# Supplementary material for: Inducible and reversible inhibition of miRNA-mediated gene repression in vivo
Source: PubMed Central journal article supplement (PMC8476124; doi:10.7554/elife.70948), 2021-08-31
Supplement: elife-70948-fig1-figsupp1-data2.pdf [file elife-70948-fig1-figsupp1-data2.pdf]

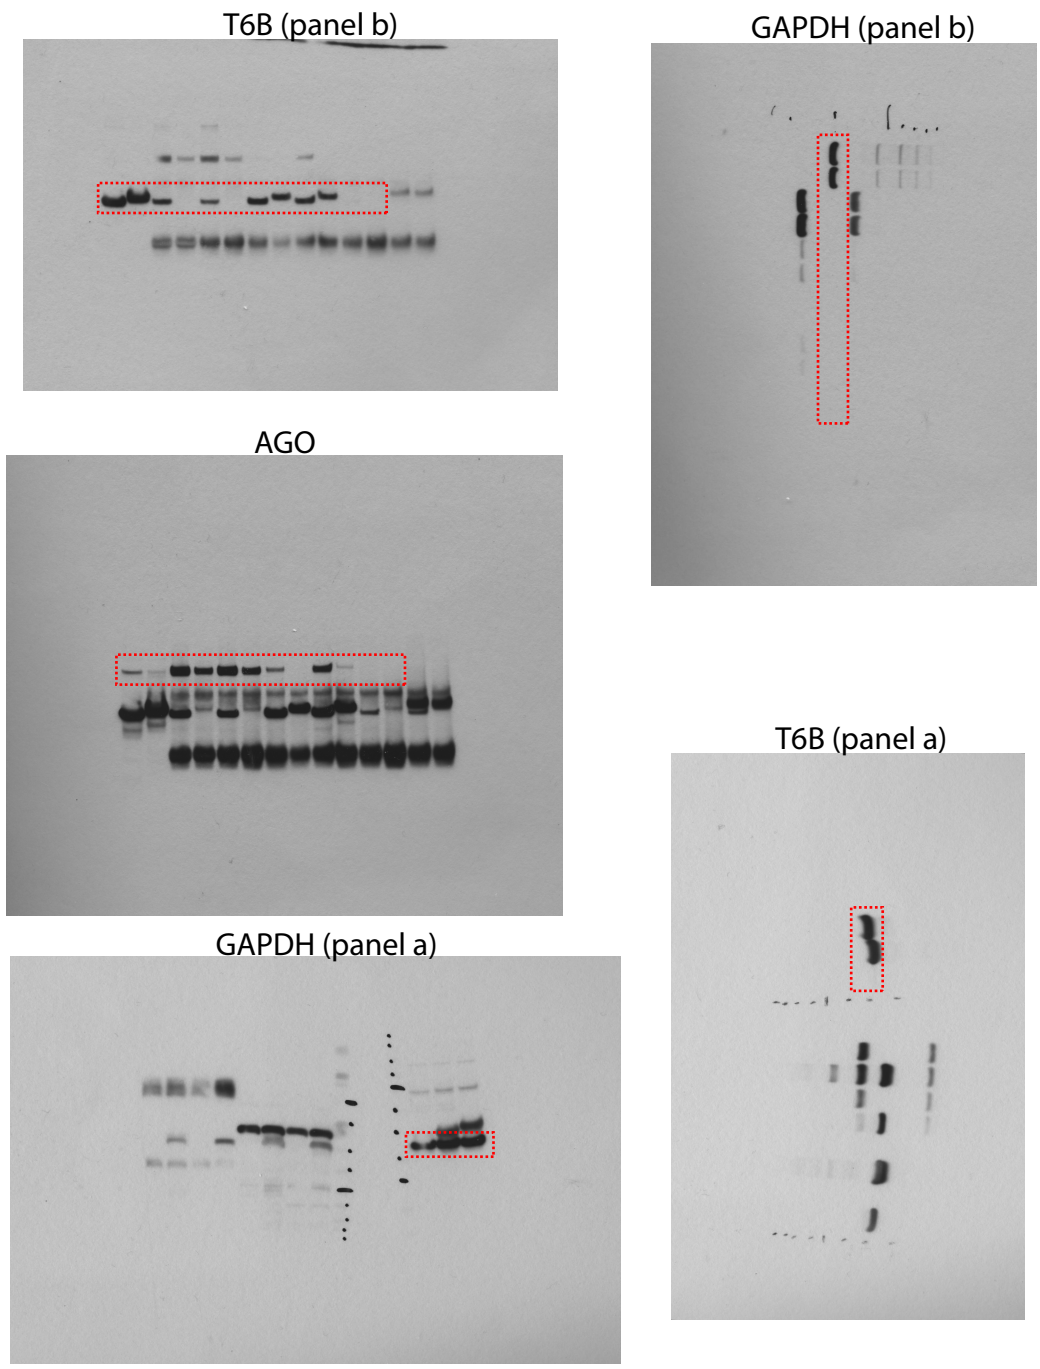

**Figure 1-figure supplement 1-source data 2. Uncropped blots shown in Figure 1-figure supplement 1. Red dashed boxes indicate the cropped area used in figure.**
