# Supplementary material for: Inducible and reversible inhibition of miRNA-mediated gene repression in vivo
Source: PubMed Central journal article supplement (PMC8476124; doi:10.7554/elife.70948), 2021-08-31
Supplement: elife-70948-fig1-figsupp2-data2.pdf [file elife-70948-fig1-figsupp2-data2.pdf]

Ago in MEF-T6B

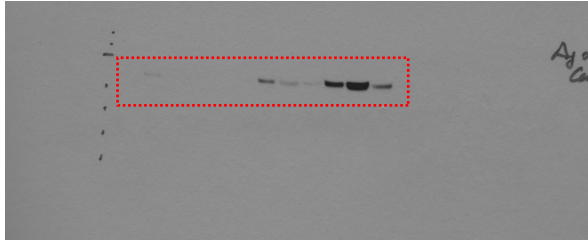

Ago in MEF-T6B-mut

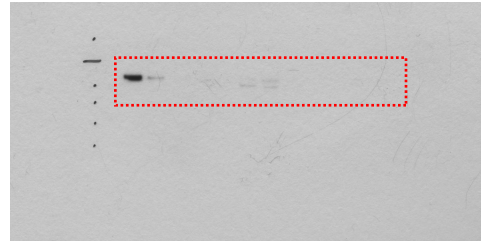

T6B in MEF-T6B

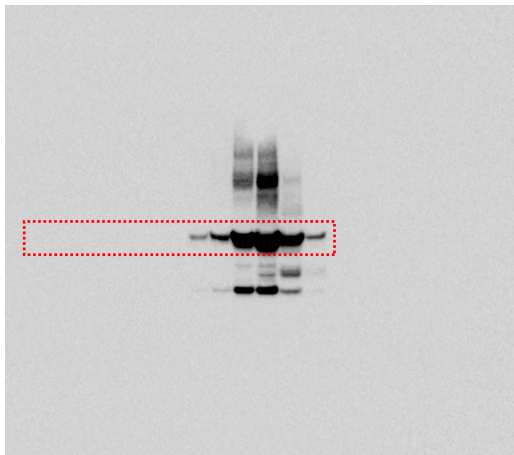

T6B in MEF-T6B-mut

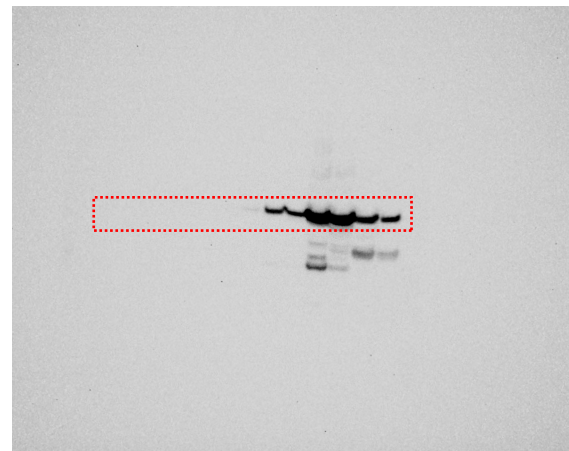

**Figure 1-figure supplement 2-source data 2. Uncropped blots shown in Figure 1-figure supplement 2. Red dashed boxes indicate the cropped area used in figure.**
