# Supplementary material for: Inducible and reversible inhibition of miRNA-mediated gene repression in vivo
Source: PubMed Central journal article supplement (PMC8476124; doi:10.7554/elife.70948), 2021-08-31
Supplement: elife-70948-fig2-data8.pdf [file elife-70948-fig2-data8.pdf]

Ago2 day 0

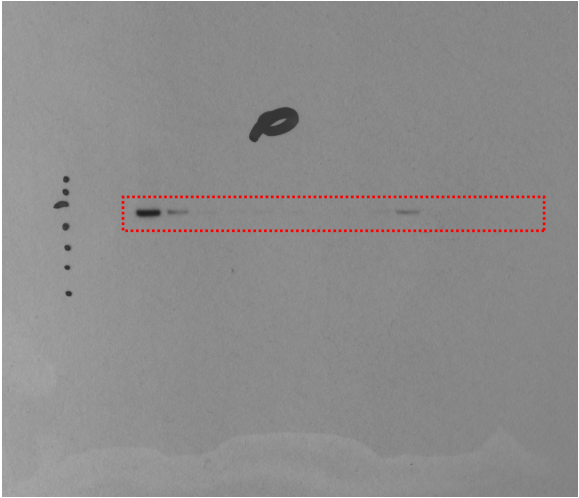

Ago2 day 5

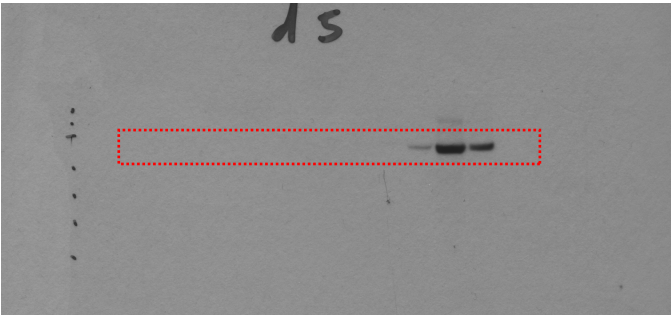

Ago2 day 5 off dox

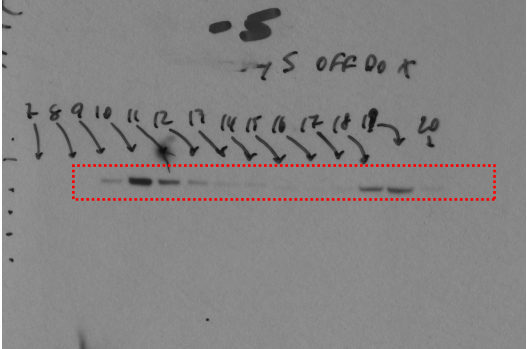

**Figure 2-source data 8. Uncropped blots shown in figure 2E. Red dashed boxes indicate the cropped area used in figure.**
