# Supplementary material for: Inducible and reversible inhibition of miRNA-mediated gene repression in vivo
Source: PubMed Central journal article supplement (PMC8476124; doi:10.7554/elife.70948), 2021-08-31
Supplement: elife-70948-fig2-figsupp3-data1.pdf [file elife-70948-fig2-figsupp3-data1.pdf]

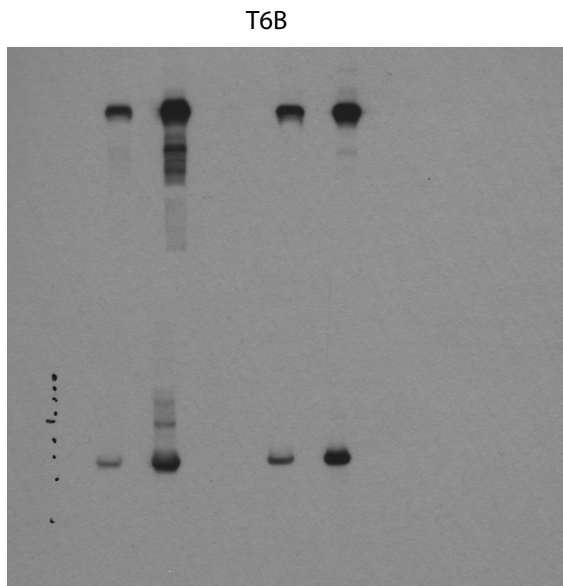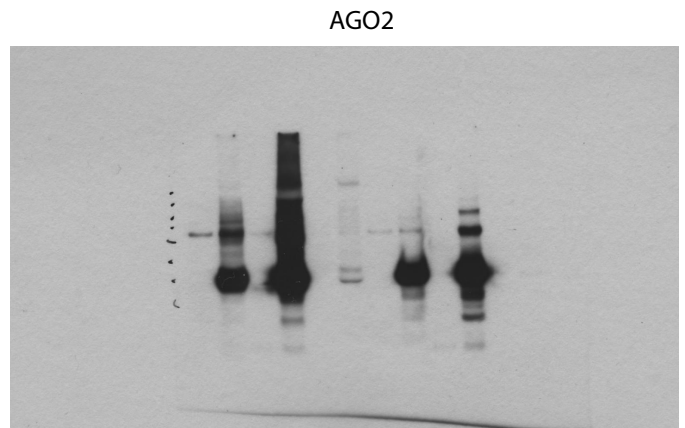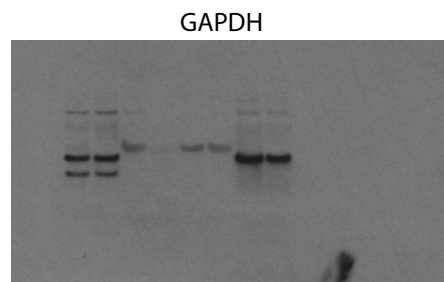

Figure 2-figure supplement 3-source data 1. Unedited blots shown in Figure 2-figure supplement 3
