# Supplementary material for: Inducible and reversible inhibition of miRNA-mediated gene repression in vivo
Source: eLife journal article supplement (doi:10.7554/elife.70948), 2021-08-31
Supplement: fig1-data6 [file elife-70948-fig1-data6-v2.pdf]

GAPDH

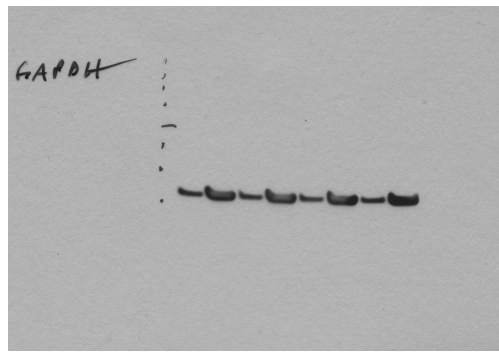

T6B

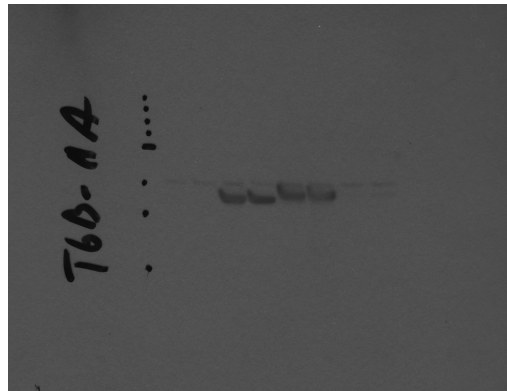

Tubulin

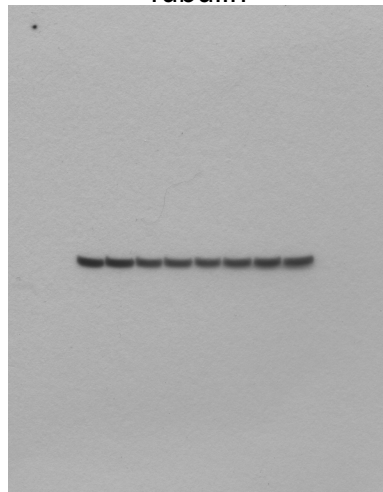

Figure 1-source data 6. Unedited gels used in Figure 1F.
