# Supplementary material for: Inducible and reversible inhibition of miRNA-mediated gene repression in vivo
Source: eLife journal article supplement (doi:10.7554/elife.70948), 2021-08-31
Supplement: fig1-data7 [file elife-70948-fig1-data7-v2.pdf]

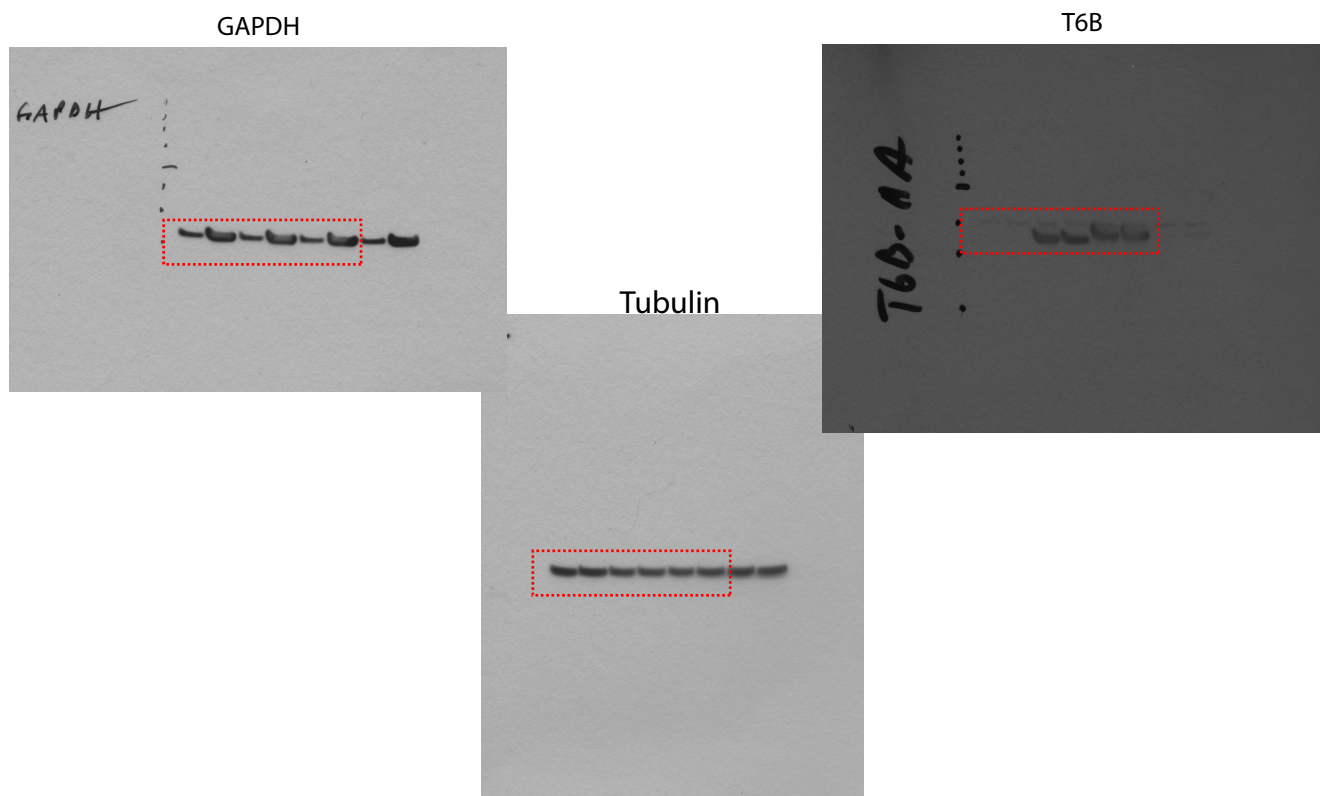

**Figure 1-source data 7. Uncropped gels used in Figure 1F.** Red dashed boxes indicate the cropped area used in figure.
