# Supplementary material for: Inducible and reversible inhibition of miRNA-mediated gene repression in vivo
Source: eLife journal article supplement (doi:10.7554/elife.70948), 2021-08-31
Supplement: fig1-figsupp2-data1 [file elife-70948-fig1-figsupp2-data1-v2.pdf]

Ago in MEF-T6B

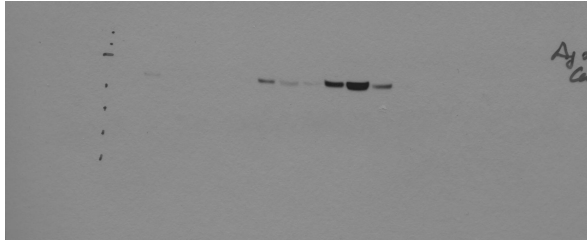

Ago in MEF-T6B-mut

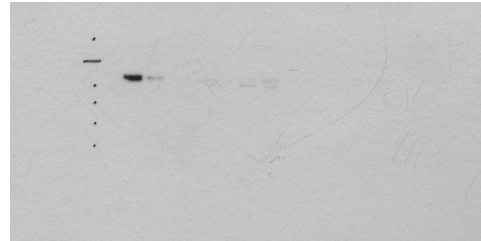

T6B in MEF-T6B

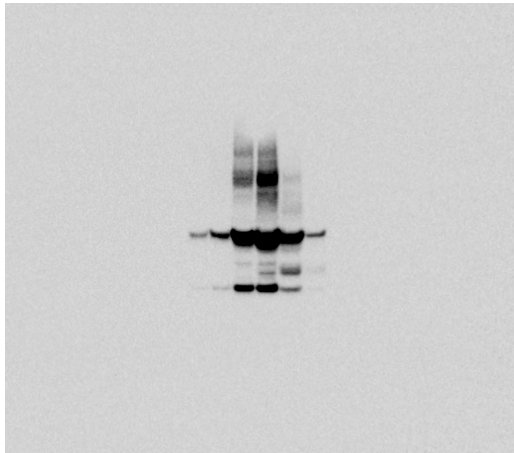

T6B in MEF-T6B-mut

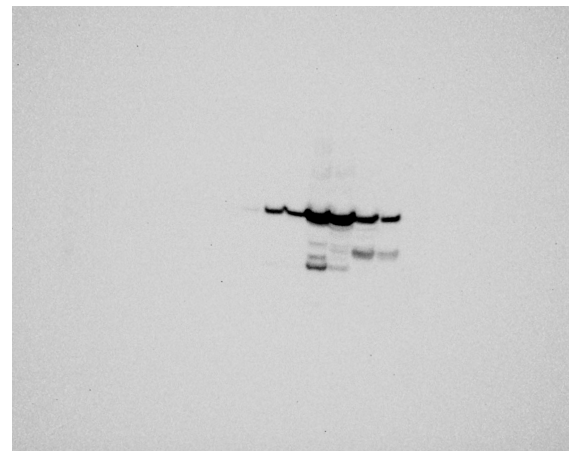

Figure 1-figure supplement 2-source data 1. Unedited blots shown in Figure 1-figure supplement 2.
