# Supplementary material for: Inducible and reversible inhibition of miRNA-mediated gene repression in vivo
Source: eLife journal article supplement (doi:10.7554/elife.70948), 2021-08-31
Supplement: fig2-data3 [file elife-70948-fig2-data3-v2.pdf]

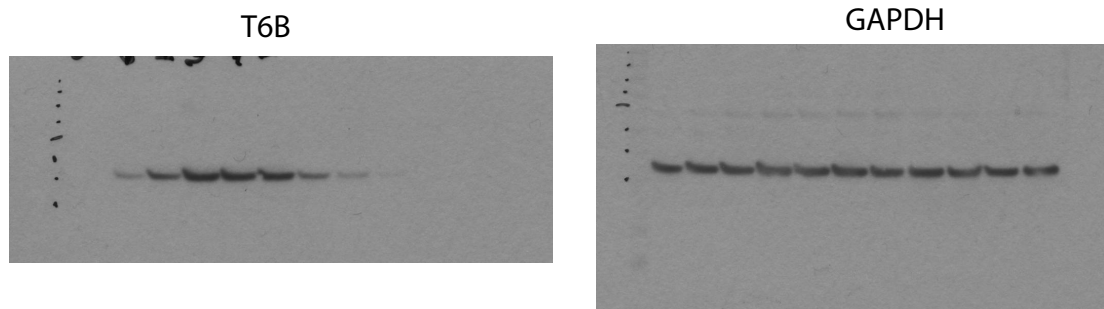

**Figure 2-source data 3. Unedited blots shown in Figure 2C.**
