# Supplementary material for: Inducible and reversible inhibition of miRNA-mediated gene repression in vivo
Source: eLife journal article supplement (doi:10.7554/elife.70948), 2021-08-31
Supplement: fig2-data4 [file elife-70948-fig2-data4-v2.pdf]

T6B

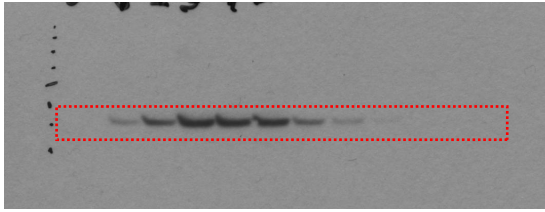

GAPDH

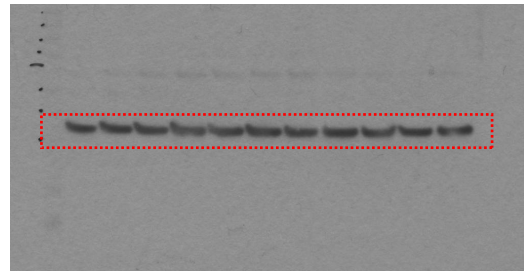

**Figure 2-source data 4. Uncropped blots shown in Figure 2C. Red dashed boxes indicate the cropped area used in figure.**
