# Supplementary material for: Inducible and reversible inhibition of miRNA-mediated gene repression in vivo
Source: eLife journal article supplement (doi:10.7554/elife.70948), 2021-08-31
Supplement: fig2-data5 [file elife-70948-fig2-data5-v2.pdf]

AGO2

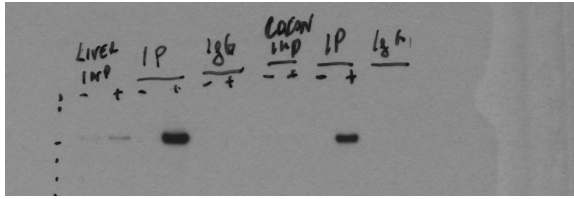

GAPDH

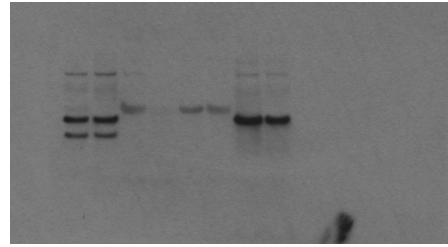

T6B

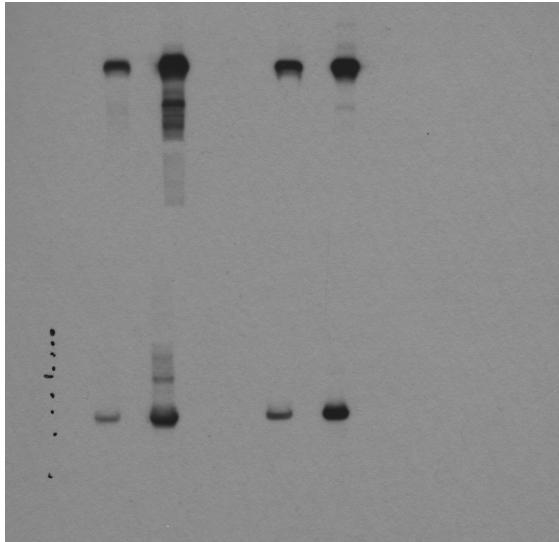

Figure 2-source data 5. Unedited blots shown in Figure 2D.
