# Supplementary material for: Inducible and reversible inhibition of miRNA-mediated gene repression in vivo
Source: eLife journal article supplement (doi:10.7554/elife.70948), 2021-08-31
Supplement: fig2-data6 [file elife-70948-fig2-data6-v2.pdf]

AGO2

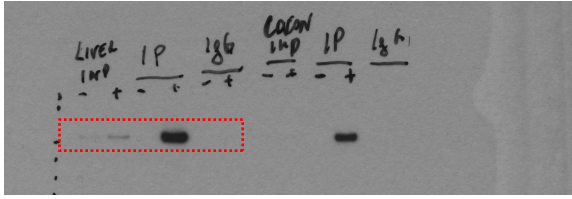

GAPDH

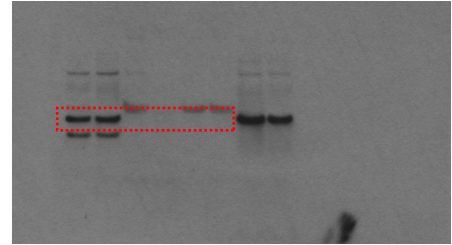

T6B

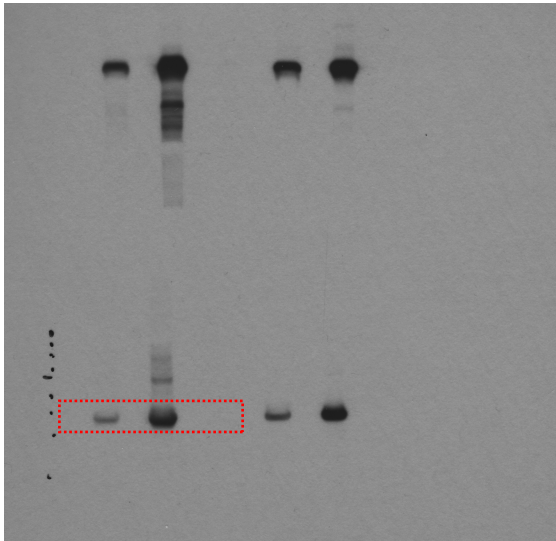

**Figure 2-source data 6. Uncropped blots shown in Figure 2D.** Red dashed boxes indicate the cropped area used in figure.
