# Supplementary material for: Inducible and reversible inhibition of miRNA-mediated gene repression in vivo
Source: eLife journal article supplement (doi:10.7554/elife.70948), 2021-08-31
Supplement: fig2-figsupp1-data1 [file elife-70948-fig2-figsupp1-data1-v2.pdf]

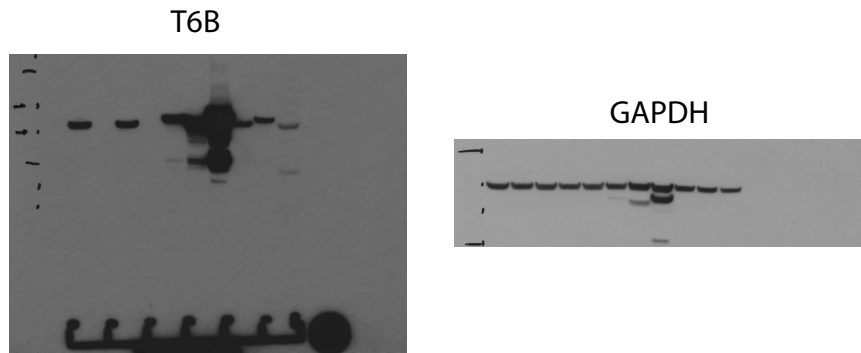

Figure 2-figure supplement 1-source data 1.Unedited blots shown in Figure 2-figure supplement 1.
