# Supplementary material for: Inducible and reversible inhibition of miRNA-mediated gene repression in vivo
Source: eLife journal article supplement (doi:10.7554/elife.70948), 2021-08-31
Supplement: fig2-figsupp1-data2 [file elife-70948-fig2-figsupp1-data2-v2.pdf]

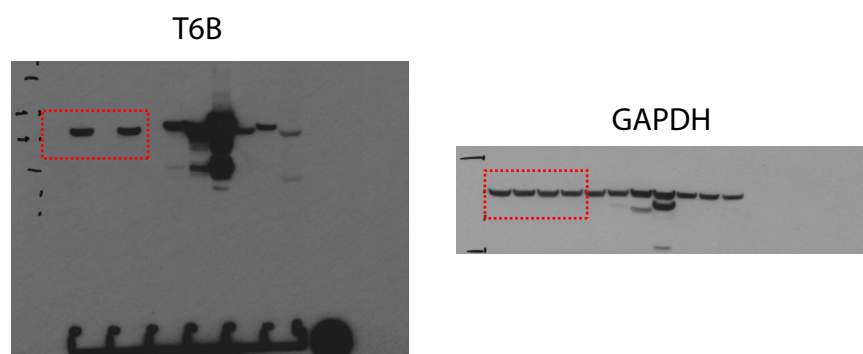

**Figure 2-figure supplement 1-source data 2. Uncropped blots shown in Figure 2-figure supplement 1.**  
Red dashed boxes indicate the cropped area used in figure.
