# Supplementary material for: Inducible and reversible inhibition of miRNA-mediated gene repression in vivo
Source: eLife journal article supplement (doi:10.7554/elife.70948), 2021-08-31
Supplement: fig3-data1 [file elife-70948-fig3-data1-v2.pdf]

|     |                     | CTRL (n=5)   | T6B (n=5)    | <i>P</i> value |
|-----|---------------------|--------------|--------------|----------------|
| RBC | 10 <sup>6</sup> /μL | 10.8 ± 0.483 | 10.7 ± 0.292 | 0.9225         |
| HGB | g/dL                | 16.4 ± 0.589 | 14.8 ± 0.277 | 0.0052         |
| HCT | %                   | 57.0 ± 1.74  | 52.0 ± 0.631 | 0.0037         |
| MCV | fL                  | 52.8 ± 1.33  | 48.6 ± 0.858 | 0.0041         |
| MCH | pg                  | 15.2 ± 0.2   | 13.9 ± 0.195 | 0.0002         |
| RDW | %                   | 22.8 ± 0.342 | 25.5 ± 0.716 | 0.0019         |
| RET | 10 <sup>3</sup> /μL | 564 ± 68.5   | 569 ± 76.5   | 0.9273         |
| WBC | 10 <sup>3</sup> /μL | 7.46 ± 1.16  | 9.16 ± 1.23  | 0.2608         |
| PLT | 10 <sup>3</sup> /μL | 990 ± 290    | 1270 ± 154   | 0.2728         |

Figure 3-source data 1: Complete blood counts (CBCs) of whole blood from R26<sup>T6B</sup> and R26<sup>CTL</sup> mice taken after 3 weeks on doxycycline. Abbreviations are as follows: RBC: red blood cell count; HGB: hemoglobin; HCT: hematocrit; MCV: mean corpuscular volume; MCH: mean cell hemoglobin; RDW: red cell distribution width; RET: reticulocyte count; WBC: white blood cell count; PLT: platelet count.
