# Supplementary material for: Inducible and reversible inhibition of miRNA-mediated gene repression in vivo
Source: eLife. 2021 Aug 31;10:e70948. doi: 10.7554/eLife.70948 (PMC8476124; doi:10.7554/eLife.70948)
Supplement: Figure 1—source data 1. [file elife-70948-fig1-data1.csv]

GeneSymbol	logFC_T6B	Adj_pval_T6B	logFC_T6Bmut	Adj_pval_T6Bmut	ENSEMBL_ID
Gm6123	0.0179874142002975	1	0.0374189306738179	1	ENSMUSG00000103922
Mrpl15	-0.0197617450470109	0.880901351953662	0.0284855537746632	0.899790150568561	ENSMUSG00000033845
Gm37144	-0.0532207639821938	1	-0.0183139673331094	1	ENSMUSG00000102275
Lypla1	0.15851684983501	0.136030963049062	0.101681726582219	0.573244446582754	ENSMUSG00000025903
Tcea1	0.0442085458994271	0.580100729131612	-0.160323891330822	0.0284193773418777	ENSMUSG00000033813
Gm6104	0.00263365413516382	0.991476161109773	-0.109842591974872	1	ENSMUSG00000062588
Gm37277	-0.10063775079394	1	0.119895711798594	1	ENSMUSG00000103280
Rgs20	0.112274120764655	0.687059270904229	-0.343375048993769	0.248322000970035	ENSMUSG00000002459
Atp6v1h	0.334683061870573	4.43793401845803e-06	0.0157743257972085	0.942783089964322	ENSMUSG00000033793
Rb1cc1	0.174340357422127	0.00145727161030331	-0.30944553319696	3.16669969263244e-08	ENSMUSG00000025907
4732440D04Rik	0.0312624166595533	0.920089959000924	-0.345400770874556	0.230726391255888	ENSMUSG00000090031
Gm37108	-0.119214182034277	1	0.082909389728024	1	ENSMUSG00000102135
Pcmtd1	-0.189122993199182	0.0197014526700647	0.183016707205262	0.0586086657824043	ENSMUSG00000051285
Gm38372	-0.0703626184101125	0.80676989833522	-0.100865695141575	0.828262708632193	ENSMUSG00000103509
Gm9826	-0.0863140567510471	0.762028840497549	0.240411515356622	0.499867491125894	ENSMUSG00000048538
Gm26901	-0.0320217440791419	1	-0.00869938047572684	1	ENSMUSG00000097797
Gm15452	0.107791889383295	0.698521068624582	0.0569425295838397	0.91838541036594	ENSMUSG00000084353
Rrs1	-0.134468916143327	0.0870504156081969	-0.0828613619182076	0.50145663329539	ENSMUSG00000061024
Adhfe1	0.777305526135293	7.52795196981915e-05	0.140270892146182	0.748920140880788	ENSMUSG00000025911
2610203C22Rik	0.197992434521326	0.398908900332308	-0.24682022948181	1	ENSMUSG00000079671
Mybl1	0.369399370056395	0.00719826466939263	0.0625657831565681	0.859065816213701	ENSMUSG00000025912
Vcpip1	0.154986202784961	0.0235752009164381	0.0103735353765368	0.958599789072901	ENSMUSG00000045210
1700034P13Rik	0.0129469740623723	1	0.0338341903782185	1	ENSMUSG00000097893
Sgk3	-0.00194139827695609	0.995218175358915	-0.109563647038748	0.816773285550564	ENSMUSG00000025915
Snhg6	-0.268670963226956	0.0460103813369905	-0.0132459514687782	0.969932378243282	ENSMUSG00000098234
Snord87	0.0206919468147184	1	0.0519043274411957	1	ENSMUSG00000093178
Tcf24	-0.174874798924701	0.484238045669747	0.0360089916802466	0.951999609044576	ENSMUSG00000099032
Cops5	0.134976840068234	0.0429671025996584	-0.0168045489149024	0.924004611714967	ENSMUSG00000025917
Cspp1	-0.00140876541174181	0.992880086867463	0.101577433363972	0.580582614236109	ENSMUSG00000056763
Arfgef1	0.336170480860542	6.8379508462261e-11	-0.0284068169632342	0.835171508466144	ENSMUSG00000067851
Cpa6	-0.152510256039894	0.527393588859408	-0.187999573659254	0.60040853966203	ENSMUSG00000042501
Prex2	0.293022475495769	0.0357677059668479	0.363925050302635	0.0244734670921709	ENSMUSG00000048960
A830018L16Rik	-0.0163006858020421	1	-0.0431669889016458	1	ENSMUSG00000057715
Sulf1	-0.211703974451297	7.97352324236455e-06	-0.252032746963177	2.06059234272429e-07	ENSMUSG00000016918
Slco5a1	-0.152138773883485	0.557682165074899	0.147760921110694	0.732464287841807	ENSMUSG00000025938
Ncoa2	0.173093475871529	0.028804232517898	-0.0111231880663581	0.962751786454354	ENSMUSG00000005886
Tram1	0.107941879772558	0.04351713478736	0.0575276834225992	0.532064061679738	ENSMUSG00000025935
Lactb2	0.464550310289087	6.34470213504413e-10	0.150701763361093	0.19727171638417	ENSMUSG00000025937
Gm38319	-0.0918065290161819	0.705782047474256	0.0170920005027475	1	ENSMUSG00000102982
Gm5523	0.0696807402564681	1	-0.133452272529803	1	ENSMUSG00000097711
Eya1	-0.166588999984088	0.322943592218838	0.659520718307969	1.12488049616035e-06	ENSMUSG00000025932
Rpl5-ps1	0.163916755476965	0.425006275860608	0.1252446549411	1	ENSMUSG00000082193
Gm10566	-0.0880032501772175	1	-0.0758268257410755	1	ENSMUSG00000073737
Terf1	-0.0540846583733493	0.710587794868954	0.0684739932111057	0.765567760131556	ENSMUSG00000025925
Gm37509	-0.0327177943353811	1	-0.0621015179434501	1	ENSMUSG00000104379
Rpl7	-0.227610272571612	7.94747941758357e-15	-0.0751038389503726	0.0560259782936271	ENSMUSG00000043716
Rdh10	-0.171083076255922	0.264384160732261	-0.0547024875453503	0.869552472801926	ENSMUSG00000025921
Stau2	0.270810591319065	0.0373601136409691	-0.0912478618565853	0.738109514684424	ENSMUSG00000025920
Ube2w	0.2623273905872	0.00070351965941571	0.0179677197457778	0.938758540328248	ENSMUSG00000025939
Gm38342	-0.0160242644613597	1	0.0760052860317741	1	ENSMUSG00000102457
Tceb1	0.124053878828513	0.0531271840377545	0.016372004205552	0.922148032100664	ENSMUSG00000079658
D030040B21Rik	0.112457747712445	1	-0.0661011829333778	1	ENSMUSG00000097744
Tmem70	-0.128987950930932	0.233903455058517	-0.174716036174919	0.179046622457876	ENSMUSG00000025940
Ly96	0.0895555144206449	0.733103279305103	-0.170324520330821	0.652176469564948	ENSMUSG00000025779
Gm5828	-0.0558595083971361	1	0.00834770581534213	1	ENSMUSG00000091020
Jph1	-0.567342711978922	0.00553361199186717	0.141513502290256	0.741631296962485	ENSMUSG00000042686
Gdap1	-0.0907287730754972	1	0.00447904446069719	1	ENSMUSG00000025777
Rbm6-ps1	0.0189285919556927	1	-0.0646245590443028	1	ENSMUSG00000101589
Pi15	-0.487910195684636	0.00973603317758904	0.985606602092195	3.12822293952407e-09	ENSMUSG00000067780
Crispld1	-0.280385611269505	0.233365771090102	0.157194752699858	0.720174330395085	ENSMUSG00000025776
Gm10075	-0.122180418049057	1	0.0117925456684432	1	ENSMUSG00000100720
Gm4849	-0.0596926674103265	1	-0.09292804649153	1	ENSMUSG00000100204
Mcm3	0.0789663539595408	0.112453887320167	-0.142774087893812	0.00536858604353755	ENSMUSG00000041859
6720483E21Rik	-0.0157272391016822	1	-0.127660880278967	1	ENSMUSG00000097934
Paqr8	-0.316357030198654	0.031129556575959	-0.183369657931956	0.435948185577901	ENSMUSG00000025931
Efhc1	-0.066076976952608	0.831530132484253	0.213412794649639	0.590287112234338	ENSMUSG00000041809
Tram2	0.348814952472335	6.15212974232466e-09	-0.225353734304404	0.00149699531972599	ENSMUSG00000041779
Tmem14a	0.0573953884363422	0.855022183035779	0.0818804913664737	0.87876204896533	ENSMUSG00000025933
Kcnq5	-0.0483010875668417	0.862859147373331	-0.259366292463364	0.368808338151668	ENSMUSG00000028033
Gm7658	-0.208921880296417	0.230778304316588	0.0132463801343143	1	ENSMUSG00000082935
Gm27028	0.0949029105771986	0.66925439955037	0.0185990351509178	1	ENSMUSG00000097970
Ogfrl1	-0.437073308543303	0.00102337431630405	-0.108058223551261	0.699332491368007	ENSMUSG00000026158
Smap1	0.264871029896244	0.00114479395044069	0.0737191582569851	0.664967391161383	ENSMUSG00000026155
Sdhaf4	0.125648227268982	0.611274942072986	0.0977630728760283	0.82923551034055	ENSMUSG00000026154
Fam135a	0.415300962288717	1.77539110503506e-08	0.0122830941227261	0.960314102341276	ENSMUSG00000026153
Gm28439	0.141525476126697	0.4045479617867	0.311373681979182	0.0814071096961805	ENSMUSG00000100131
Gm10222	0.274113048276496	0.197411397155211	0.230010984257993	0.482875008595253	ENSMUSG00000067736
Gm28438	0.220767908437693	0.292370622300927	0.42383469622924	0.0537260567940345	ENSMUSG00000101939
Gm28437	0.154744994687482	0.350579259929139	0.18583007885572	0.423536586967691	ENSMUSG00000101111
Gm10925	0.129608403058876	0.486553455850478	0.330861624392937	0.0783390614916914	ENSMUSG00000100862
Gm28661	0.116215340690595	0.316277451445214	0.172376338453354	0.225251002857928	ENSMUSG00000102070
Gm29216	0.224825820482635	0.0575157071271647	0.0964576864759139	0.678380918675519	ENSMUSG00000101249
Lmbrd1	0.328012208808637	0.000445011638450967	0.0215717534616095	0.939087499118362	ENSMUSG00000073725
Gm7846	-0.388219354481458	0.0867394628581427	-0.0230720429766987	0.969426117608608	ENSMUSG00000086240
Gm5525	-0.326041261456338	0.155993764888619	-0.0444555725203834	0.940539075238677	ENSMUSG00000099492
Phf3	0.143865317611861	0.00276417301487247	-0.0274651246843768	0.80793357878845	ENSMUSG00000048874
Gm37906	-0.0840797874998154	1	0.0288285895250457	1	ENSMUSG00000104315
Ptp4a1	0.270940096743621	0.00605593616888608	0.0334391034712579	0.902602959165024	ENSMUSG00000026064
Khdrbs2	-0.413718879913873	0.0589389881407901	-0.069654960163862	0.90138724673582	ENSMUSG00000026058
Prim2	-0.203830558950742	0.0147809300897725	-0.00457507141785348	0.984064379206663	ENSMUSG00000026134
1700001G17Rik	0.0825237443727876	0.742587865544727	0.174218936364784	1	ENSMUSG00000103746
Rab23	-0.482756560659783	3.51603681070327e-15	-0.0892707769744627	0.402349438466283	ENSMUSG00000004768
Bag2	-0.0850803366384187	0.332964005518842	-0.143050909053665	0.154525236379205	ENSMUSG00000042215
Zfp451	-0.0595201951082554	0.451122603434965	-0.0308894332473297	0.837631271637311	ENSMUSG00000042197
Gm15455	0.105132980420407	1	0.0344809591818392	1	ENSMUSG00000081402
Bend6	-0.0205516127833025	0.932405586009557	0.0957807222482301	0.774872356059359	ENSMUSG00000042182
Gm37067	-0.00766478832174713	1	0.0509284201314825	1	ENSMUSG00000104416
Dst	0.201008570537631	0.0483342187501708	0.00809401962702991	0.976774951953821	ENSMUSG00000026131
Gm38157	-0.0406457791335647	1	-0.0879085223679269	1	ENSMUSG00000103364
D630036G22Rik	0.0669028044157251	0.745315176907055	-0.419390265988316	0.0174445630853071	ENSMUSG00000104475
Gm3052	0.17908708091589	0.346025997303205	-0.00410870516129332	1	ENSMUSG00000101462
Gm37233	-0.162213522806587	0.524950891107572	0.101160760373046	0.834060602146985	ENSMUSG00000102336
Ccdc115	-0.0604245578811457	0.745156186900696	-0.0149603761881112	0.969054961248981	ENSMUSG00000042111
Imp4	0.185428831136009	0.016621045220996	-0.108656704300606	0.375139861397339	ENSMUSG00000026127
Arhgef4	-0.256907853233025	0.271688589373259	-0.0367686165968948	0.950527514497838	ENSMUSG00000037509
Gm38336	-0.0354059238482705	1	0.0350084458442601	1	ENSMUSG00000104002
Fam168b	0.158537067141641	0.000265003068621195	-0.00907399837461567	0.944676028393736	ENSMUSG00000037503
Plekhb2	0.514610227505585	1.70019462795828e-11	-0.0758000192466613	0.648336510324752	ENSMUSG00000026123
Hs6st1	-0.527404446111774	1.9415848374092e-10	-0.232867326713773	0.0190074934383062	ENSMUSG00000045216
Uggt1	0.550294461530948	3.23506599687686e-56	-0.1045901494179	0.0287411632935547	ENSMUSG00000037470
Neurl3	0.481661925016759	0.0112755506666947	0.219141453143757	1	ENSMUSG00000047180
Arid5a	0.0581970529472344	0.753266705642085	-0.297680564080574	0.0858638406130632	ENSMUSG00000037447
Kansl3	0.030453831521795	0.741835212640788	-0.0587753505049268	0.65481762466232	ENSMUSG00000010453
Lman2l	0.170231587848988	0.252197879656919	-0.0937244944486874	0.74003690729555	ENSMUSG00000001143
Cnnm4	0.10623566258932	0.435658684356412	-0.302142238510447	0.0249159577653048	ENSMUSG00000037408
Cnnm3	0.191573800697722	0.210712573098625	-0.19786109509239	0.357120097420156	ENSMUSG00000001138
Ankrd23	-0.0397084148033023	0.877817115369784	-0.0288825191263663	1	ENSMUSG00000067653
Ankrd39	0.108020774059452	0.703388668473561	-0.0612909210056629	0.913187915759482	ENSMUSG00000079610
Sema4c	0.0318936513568802	0.874897855039263	-0.00948823538743454	0.979031530059649	ENSMUSG00000026121
D430040D24Rik	0.112068177318896	0.667837917492673	-0.0351162880972679	1	ENSMUSG00000087589
Cox5b	0.162762921706635	0.0816706580065512	0.096851867799192	0.520218512992194	ENSMUSG00000061518
Actr1b	-0.133828591052998	0.00974246983168635	-0.0253976134860917	0.831039858981025	ENSMUSG00000037351
Tmem131	0.28406336830553	4.61936301307051e-10	-0.121539824911676	0.0477637851173336	ENSMUSG00000026116
Inpp4a	-0.124901966439147	0.434805464032371	0.0374006236550158	0.917235159196797	ENSMUSG00000026113
Coa5	0.19888089978914	0.0022445893261488	-0.0152147821870326	0.935859240701809	ENSMUSG00000026112
Unc50	0.170391010444491	0.189455879830237	0.0786133450493852	0.75488174172796	ENSMUSG00000026111
Mgat4a	0.535248948826648	0.0123647906221956	-0.158027969636053	0.723598436748542	ENSMUSG00000026110
2010300C02Rik	-0.0882717157800541	1	0.14798429908896	1	ENSMUSG00000026090
Tsga10	0.221222579811112	0.346025997303205	0.0210230723144849	0.970913302370155	ENSMUSG00000060771
Lipt1	-0.0942883119271651	0.682996807219708	-0.0276021378997569	0.95739027275397	ENSMUSG00000037216
Mitd1	-0.00897938976657086	0.96670980055832	-0.0252973562763822	0.948226011632932	ENSMUSG00000026088
Mrpl30	-0.0744283062484235	0.50668605327688	0.0150009876344585	0.9542466240403	ENSMUSG00000026087
Txndc9	0.0527690741016344	0.594031784836732	-0.0301925327417625	0.878834563619259	ENSMUSG00000058407
Eif5b	0.0118914165582894	0.863174277589297	-0.0611183664093206	0.409259540382726	ENSMUSG00000026083
Rev1	-0.0850090263834003	0.454456707725493	-0.0141261586302254	0.958057522647982	ENSMUSG00000026082
Gm37062	0.183463165125022	0.410493750723499	-0.0816300446262049	1	ENSMUSG00000103804
Aff3	-0.40014313575677	0.00146119790251551	-0.145360300974384	0.531337568201071	ENSMUSG00000037138
Lonrf2	0.0380732504738611	1	-0.0723841597831121	1	ENSMUSG00000048814
Chst10	-0.153192873923683	0.519673036402455	-0.0577724513921873	1	ENSMUSG00000026080
Pdcl3	0.0130571174971455	0.885725057345706	-0.143299410630992	0.0471368669125506	ENSMUSG00000026078
Gm37309	0.0988469555908306	0.736942229937646	-0.125054237902683	0.793595836215952	ENSMUSG00000103046
Npas2	-0.100016649148314	0.727791936010696	-0.00228180477310309	0.996929063654453	ENSMUSG00000026077
Rpl31	-0.289346567355338	2.0294237047247e-11	-0.0671110040008266	0.351346022554429	ENSMUSG00000073702
Tbc1d8	0.0195074073613529	1	0.0155186118159717	1	ENSMUSG00000003134
Cnot11	0.112018275834226	0.309216372005283	-0.0126981962157195	0.963521832213409	ENSMUSG00000003135
Gm15832	-0.255756883837697	0.235919363231295	0.0494695107320327	1	ENSMUSG00000085894
Snord89	-0.337774524868229	1	-0.00416413474166873	1	ENSMUSG00000077704
Rnf149	0.228797892447657	0.0451432958412503	0.213740974166215	0.143336028617563	ENSMUSG00000048234
Rfx8	-0.0152104572163591	1	-0.0674762657916772	1	ENSMUSG00000057173
Map4k4	0.324825537270175	8.7360694282181e-21	0.0524709064252597	0.407806004340431	ENSMUSG00000026074
Il1r2	0.0824096926221044	1	0.075931855359193	1	ENSMUSG00000026073
Il1r1	-0.573600232214831	5.61719533942209e-14	0.202618349092481	0.0307280584363198	ENSMUSG00000026072
Il1rl2	-0.0511155839429433	0.802861459717716	0.044334371453427	0.906285124637698	ENSMUSG00000070942
Gm17970	-0.0291685695637654	1	0.02855571727148	1	ENSMUSG00000103230
Il1rl1	-1.3230761667615	0	0.15936037531752	7.23951181795088e-08	ENSMUSG00000026069
Il18r1	-0.0732621980039901	1	0.191425134148572	1	ENSMUSG00000026070
Il18rap	0.19329749807228	0.104843016658161	0.220552027454308	0.116683484549102	ENSMUSG00000026068
Slc9a2	-0.075431644859872	1	-0.0365646159683573	1	ENSMUSG00000026062
Mfsd9	0.155831190395797	0.523873059190649	0.0949370739544727	0.839637685990677	ENSMUSG00000041945
Tmem182	0.0601463771354597	1	0.103255970194534	1	ENSMUSG00000079588
Mrps9	0.0223108547668415	0.890994712043969	0.0349057454568532	0.902376949129886	ENSMUSG00000060679
Tgfbrap1	0.407247617468909	2.24473306262064e-05	0.0337073565923579	0.903984736735322	ENSMUSG00000070939
AI597479	-0.128047474436843	0.33232681648848	0.0201029436226252	0.950602978684121	ENSMUSG00000010290
Fhl2	0.204106539257275	0.000358042069059671	0.378918100271135	2.9837202416765e-12	ENSMUSG00000008136
Gm8210	-0.0696991603706416	1	0.105626611603895	1	ENSMUSG00000094497
Gm29040	0.169552516069249	1	0.0533746467736847	1	ENSMUSG00000099576
Nck2	-0.0331533089501421	0.869798483939273	0.135151687635004	0.578946519490453	ENSMUSG00000066877
Gm38228	-0.111953519202626	0.606957032575956	-0.156715666616296	1	ENSMUSG00000103945
1500015O10Rik	-0.0606623061734671	1	0.0488625341298618	1	ENSMUSG00000026051
Gm29156	-0.0118040961850022	1	0.0689972961562906	1	ENSMUSG00000100480
Uxs1	0.247465122917206	8.77063875787471e-05	0.0916451818315856	0.394994143173566	ENSMUSG00000057363
Gm19587	0.0108384596413607	1	-0.0679575558644882	1	ENSMUSG00000100701
Tpp2	0.317472503724669	1.85732000911062e-10	0.00419457729883715	0.978179829175056	ENSMUSG00000041763
Gm8251	-0.00992587008832256	0.974943619014481	0.0602837022456406	1	ENSMUSG00000091844
Tex30	-0.144233502215194	0.391135444065857	-0.0448186669951537	0.90645063804257	ENSMUSG00000026049
Kdelc1	0.189993633929141	0.0212505654235726	-0.0912952846626769	0.529799087917486	ENSMUSG00000026047
Bivm	0.0256619091412039	0.875159821338399	-0.0494421647113107	0.849677690861132	ENSMUSG00000041684
Ercc5	-0.433746882687864	0.000809770013651054	0.133104773570837	0.577714238452425	ENSMUSG00000026048
Gulp1	-0.568351815921241	2.24038064781853e-08	-0.264233135745015	0.0386302324341543	ENSMUSG00000056870
Gm37626	-0.0124180610240297	1	0.0573485459728362	1	ENSMUSG00000102319
Col3a1	-0.408798977685755	6.31518265867854e-63	-0.133410620431062	4.87996132432556e-07	ENSMUSG00000026043
Col5a2	1.04048240090559	0	0.982501329640005	0	ENSMUSG00000026042
Gm38211	0.0671734122349898	0.827058516140817	0.366958265892287	0.214706969711414	ENSMUSG00000104476
Gm7063	0.195574309535392	1	-0.102361388812698	1	ENSMUSG00000100361
Wdr75	0.00467393704866197	0.962498827240264	-0.0752263728609581	0.457718869744578	ENSMUSG00000025995
Gm5526	-0.200212731005699	0.433154586590859	0.0522648783313142	0.92719322447548	ENSMUSG00000084817
Slc40a1	1.22360557530766	3.60187364783566e-10	-0.342233521928269	0.269650986164105	ENSMUSG00000025993
Dnah7b	0.0171142065658982	1	0.0336800776402527	1	ENSMUSG00000041144
Gm8326	-0.0277482317996528	1	-0.164040692986619	1	ENSMUSG00000101262
Slc39a10	-0.304264523785794	0.00011193949553641	-0.270173129707196	0.00153622677756423	ENSMUSG00000025986
Gm28151	-0.238284626636734	0.176848505862832	0.106634411348053	1	ENSMUSG00000100213
Gm8337	-0.147872997670211	0.428782959273267	0.0394804746002006	1	ENSMUSG00000100033
Gm28321	0.102618194962755	0.639337312764405	0.0846115464565348	1	ENSMUSG00000100816
Tmeff2	-0.310520663070141	0.011197957962696	-0.0635894089974327	0.81674087110482	ENSMUSG00000026109
Sdpr	-0.333948696982842	1.67197176843555e-18	-0.324212395225741	5.30699655357359e-17	ENSMUSG00000045954
Nabp1	0.621213425264886	5.22775006596372e-15	0.16447767119361	0.210990408814269	ENSMUSG00000026107
Myo1b	0.190262285958453	0.00610776294221311	-0.0477395221018578	0.757703062062945	ENSMUSG00000018417
Stat1	0.100008197380311	0.703452491399749	-0.0806876822959335	0.86914474837567	ENSMUSG00000026104
Gls	0.0169006684289621	0.806800944169717	0.0310220586158651	0.765283598767333	ENSMUSG00000026103
Nab1	0.175043748360609	0.00204154236659884	0.12472814182864	0.0909117935117157	ENSMUSG00000002881
Gm5527	-0.109425845702576	1	0.00787809774974101	1	ENSMUSG00000100007
Tmem194b	0.000376813799958735	0.998671162089774	-0.118865316546251	0.774053730702442	ENSMUSG00000043015
Mfsd6	0.528004288045843	0.0134054266348904	0.247742162744118	0.495996606122342	ENSMUSG00000041439
Inpp1	-0.241536803523218	0.170047436147887	0.101184191673452	0.766150491068688	ENSMUSG00000026102
Hibch	-0.250313733275206	0.125210818989626	-0.113203723610437	0.709063534242256	ENSMUSG00000041426
Pms1	-0.0446030980510196	0.869692252150193	-0.224511572994512	0.462135433671971	ENSMUSG00000026098
Ormdl1	0.1894425495624	0.324248334273505	0.0980807137355301	0.793595836215952	ENSMUSG00000026097
Osgepl1	0.218865324397286	0.285942292646281	0.286028222495828	0.270786917473061	ENSMUSG00000026096
Asnsd1	-0.0316967076359563	0.914546843516983	0.168320031879602	0.654884348459296	ENSMUSG00000026095
Stk17b	-0.122552254282352	0.264662205477211	-0.0259093496225645	0.921225823250783	ENSMUSG00000026094
Hecw2	0.523519170201507	0.00910496403357096	0.488091380553906	0.0477277367967055	ENSMUSG00000042807
Ccdc150	0.058236149156355	1	0.132119805543954	1	ENSMUSG00000025983
Gtf3c3	-0.0512815110405948	0.66925439955037	0.0317441377296468	0.894391147072146	ENSMUSG00000041303
Pgap1	-0.156269105922093	0.392934668964106	-0.144133657591623	0.620855688885383	ENSMUSG00000073678
Ankrd44	0.45924935488125	0.00156167709891648	-0.114850749749578	0.722897049524231	ENSMUSG00000052331
Sf3b1	0.00862797383777942	0.869084644402679	-0.00970996767265543	0.91816867634672	ENSMUSG00000025982
E330011M16Rik	0.0189492867829048	1	0.105321140401123	1	ENSMUSG00000103030
Coq10b	0.316295754007894	0.000431141931098959	0.197808571511305	0.0924012190198611	ENSMUSG00000025981
Gm17971	0.0357647705108499	0.900387111356752	0.119570118628206	1	ENSMUSG00000101122
Hspd1	-0.0293341058965984	0.491912900100464	-0.13825980562298	8.18693157412189e-05	ENSMUSG00000025980
Hspe1	-0.0975153334918217	0.0609725666535585	-0.0379603374375905	0.710794841734074	ENSMUSG00000073676
Gm16581	-0.0641220465258174	1	0.126022587707359	1	ENSMUSG00000089670
Mob4	0.16287892786595	0.031129556575959	0.127133350402583	0.233317353811532	ENSMUSG00000025979
Rftn2	0.0565343232739408	0.733835992337625	-0.0856945779869872	0.738638776055035	ENSMUSG00000025978
Gm10561	-0.189205590975271	0.403018708821121	0.0760953945250462	0.874261590475651	ENSMUSG00000097649
Mars2	0.0500708197808034	0.745755658221515	-0.0056587416163712	0.985828289268003	ENSMUSG00000046994
Gm8292	-0.0371614510993552	0.902074393591481	-0.102254343018564	0.820653785110024	ENSMUSG00000100215
Plcl1	0.19000409153152	0.417492497411168	0.0964697557095637	0.831736342968185	ENSMUSG00000038349
Gm6644	-0.0459343509624308	0.841579417397863	-0.0925325141381115	1	ENSMUSG00000100309
Satb2	-0.0382050235851781	0.841882153657495	-0.180346207724738	0.381468298682927	ENSMUSG00000038331
9130024F11Rik	-0.117625547861612	0.66917111214498	0.071347276945587	0.898095501829016	ENSMUSG00000087022
4930558J18Rik	-0.0550462545867963	0.863270924429844	-0.401152402651381	0.161067694250372	ENSMUSG00000097519
1700066M21Rik	0.203625870592672	0.155863736435499	0.041816668365036	0.906285124637698	ENSMUSG00000038323
Tyw5	-0.0637655069082516	0.72626208211194	-0.033253579849663	0.926458335763497	ENSMUSG00000048495
9430016H08Rik	-0.0496184369501818	0.806829985348514	0.139061910435985	0.578269261297085	ENSMUSG00000025971
Spats2l	-0.61893446542743	0.00285801304712948	-0.139606140141976	0.758751425996463	ENSMUSG00000038305
Kctd18	-0.107695386335308	0.600738703101017	0.271219402814121	0.221909292854206	ENSMUSG00000054770
Sgol2a	-0.186019560410532	0.0119168838798808	0.098731737042321	0.400257349674553	ENSMUSG00000026039
Aox1	-0.084514782370794	0.753216036730451	0.254548250311163	0.42467390503169	ENSMUSG00000063558
Aox2	0.0101793786954048	1	-0.0769244775810507	1	ENSMUSG00000079554
Gm37607	0.250029323581272	0.307177303797239	-0.0582434401227075	0.918475243572124	ENSMUSG00000103839
Bzw1	0.191127965904985	5.71691073488396e-08	0.000231376962130311	0.997889704707756	ENSMUSG00000051223
Clk1	-0.0072262436986857	0.95339873699554	0.281070044228831	0.000347098363536049	ENSMUSG00000026034
Ppil3	-0.0735815660359597	0.658059339385406	-0.108158186293529	0.652453035751046	ENSMUSG00000026035
Nif3l1	-0.131408450038709	0.297911712154792	-0.112082686190535	0.569870055057686	ENSMUSG00000026036
Orc2	0.197290120058861	0.0128134439135234	-0.0895769118105339	0.526988728745069	ENSMUSG00000026037
Gm23966	-0.127392872516073	1	0.086395628674418	1	ENSMUSG00000094245
Gm15834	0.117767656858565	0.672835188314419	-0.0641504084626858	0.908199473783791	ENSMUSG00000085054
Fam126b	0.791916015470115	4.10501592124948e-14	0.106525493880411	0.666351687592201	ENSMUSG00000038174
Ndufb3	-0.0137807380826514	0.932415751645433	0.212775626394039	0.0989568682452344	ENSMUSG00000026032
Cbx3-ps7	-0.0854522525072763	0.741963568020654	0.0741136313344874	1	ENSMUSG00000059647
Als2cr12	0.277355397722305	0.216513874962143	-0.0243784863451685	1	ENSMUSG00000047528
Gm20257	-0.0893554105749104	0.741949210032739	0.298387169547134	1	ENSMUSG00000102059
Cflar	0.274843170017969	3.34125441922394e-05	0.0534614950878999	0.71814104383618	ENSMUSG00000026031
Casp8	0.251006100095565	0.00726039021034997	0.0305963847141177	0.906285124637698	ENSMUSG00000026029
Gm37760	-0.0324944878041425	1	0.0929547391170365	1	ENSMUSG00000102719
Gm28802	0.286709426820817	0.215247071478967	-0.0449063219503099	0.938566847892942	ENSMUSG00000099719
Trak2	0.859315641413986	1.42364637136149e-58	0.0578562207010959	0.644804889205817	ENSMUSG00000026028
Stradb	0.19921742945475	0.258123585198767	-0.00577491372662363	0.989247153703135	ENSMUSG00000026027
Tmem237	-0.0677882141512979	0.678726571807748	0.104232030535187	0.670173159561018	ENSMUSG00000038079
G730003C15Rik	0.0600975613731709	1	-0.132585308327463	1	ENSMUSG00000097573
Mpp4	0.0546831371468927	0.815894481800225	0.0191339536469678	1	ENSMUSG00000079550
Als2	0.374956057637958	2.14560220402977e-06	-0.024496236444827	0.916796376872709	ENSMUSG00000026024
Cdk15	0.314354466161816	0.088189676909622	-0.0102963240608153	1	ENSMUSG00000026023
Fzd7	-0.374116682517485	4.31577864002852e-07	0.211219031614297	0.0145325935524268	ENSMUSG00000041075
Sumo1	0.0861783059980609	0.273358032407382	0.0344733783740946	0.832666040011668	ENSMUSG00000026021
D430013B06Rik	0.539758711951513	0.00658000872001556	0.0270229837439727	1	ENSMUSG00000103821
Nop58	-0.0591058680538016	0.23926970473557	-0.140915179215106	0.00327458429551402	ENSMUSG00000026020
Snord70	0.0681988707836722	1	-0.0579325917527207	1	ENSMUSG00000077345
Gm26287	0.0165052826707486	1	-0.0524409675632576	1	ENSMUSG00000089512
Bmpr2	0.0726077567559251	0.259644297065151	0.118918210277371	0.0992848202726907	ENSMUSG00000067336
Fam117b	-0.0687277484241262	0.563084304221614	-0.0432297304177919	0.845964530245229	ENSMUSG00000041040
Ica1l	-0.0865510271322369	0.705782047474256	0.136846203656404	1	ENSMUSG00000026018
Wdr12	-0.130656550760062	0.123424665896863	-0.148681259515253	0.153099510913773	ENSMUSG00000026019
Carf	0.00993069563555871	0.973542073830597	0.13181917836874	0.732711797932468	ENSMUSG00000026017
Nbeal1	0.367870266345446	1.51023692386529e-09	0.137308472561666	0.126584528750705	ENSMUSG00000073664
Cyp20a1	0.234484411040857	0.00280551005975031	-0.0365486762911715	0.858192690342925	ENSMUSG00000049439
Abi2	0.00720524711448967	0.96051984553606	0.0645052124018935	0.728840565062772	ENSMUSG00000026782
Raph1	0.413011234144262	6.31063891115574e-16	-0.191876460975648	0.00296393584627316	ENSMUSG00000026014
Eif4a-ps4	0.103458046150429	0.484988949775448	-0.0188246348573559	0.95770398518448	ENSMUSG00000101188
Rpl18-ps1	-0.0005237266803496	0.998386233815717	-0.149318550662433	0.722897049524231	ENSMUSG00000081382
Pard3b	-0.173365452004754	0.400513502985965	0.113421327276244	0.765283598767333	ENSMUSG00000052062
Pard3bos3	-0.0922199209021605	1	0.0318341095233352	1	ENSMUSG00000085400
Gm11599	-0.0154919336105157	1	0.00560796949693047	1	ENSMUSG00000084333
Nrp2	0.898344969508288	5.23864523911417e-63	0.173066725561364	0.0181895637756716	ENSMUSG00000025969
Gm37121	0.0570420200535612	0.811706604792402	-0.071188912203831	1	ENSMUSG00000103032
Ino80d	0.165464836146372	0.0249059715120485	-0.00164003372401465	0.992313074014744	ENSMUSG00000040865
Ino80dos	0.158078410661559	0.55805662330499	0.141803486127643	0.757703062062945	ENSMUSG00000084799
Gm20342	-0.221143095679289	0.384530049882015	0.300317986738671	0.368891359149776	ENSMUSG00000101599
Ndufs1	0.0159113137845924	0.866192037478771	0.0566077231107806	0.644415551510074	ENSMUSG00000025968
Eef1b2	-0.330473227572563	5.55689002486154e-20	-0.0288493340747153	0.728840565062772	ENSMUSG00000025967
Snora41	-0.0633829619655571	0.804905119339241	-0.0588821229069247	1	ENSMUSG00000064602
Gm11605	0.0337413583863906	0.918373090362295	-0.0476828388967759	0.936734670810366	ENSMUSG00000081643
Adam23	-0.58919634691843	0.00414018052104105	-0.00150943707696769	0.997635780592045	ENSMUSG00000025964
Fastkd2	0.0138073679776329	0.944555191936599	-0.118627678124282	0.623127248361457	ENSMUSG00000025962
Klf7	-0.25226468716574	0.0016852951488047	-0.224623426375605	0.023895290360402	ENSMUSG00000025959
Creb1	0.133748358670364	0.0781656563501879	-0.0926107506207469	0.445113249908413	ENSMUSG00000025958
Mettl21a	0.112962402511227	0.526724981340416	0.21388985863514	0.333471053127915	ENSMUSG00000025956
Gm29152	0.182436496820098	1	0.0526062235362264	1	ENSMUSG00000100437
2810408I11Rik	0.156336669144318	0.499302160611792	-0.00671927294186187	0.989247153703135	ENSMUSG00000087213
Ccnyl1	0.285635003091968	0.000552841340930569	-1.95798036174435e-05	0.999793557829102	ENSMUSG00000070871
Fzd5	-0.517675409694504	2.37141489831146e-06	-0.534910117418826	1.5960727704361e-06	ENSMUSG00000045005
Gm38058	-0.100672463943487	1	-0.0991490029782257	1	ENSMUSG00000102140
Plekhm3	0.0513979475420808	0.763716881965672	-0.0592679699632095	0.83871301626788	ENSMUSG00000051344
Rpl10a-ps1	-0.499578743240143	0.000627294557377345	-0.146042763633781	0.591211459994325	ENSMUSG00000084416
Gm7329	-0.00509265166732057	1	0.00594467693217998	1	ENSMUSG00000100774
Idh1	-0.109536191010293	0.0926799607332173	-0.0632628168537641	0.576941673424677	ENSMUSG00000025950
Pikfyve	0.275620782829477	0.000275886546351945	0.0453550629035156	0.801054017589754	ENSMUSG00000025949
Map2	-1.34023059388545	2.70879144372097e-52	-0.320555838129409	0.00075426412669365	ENSMUSG00000015222
Rpe	-0.0248401496121005	0.85841524962835	-0.0787152815306372	0.680280134850842	ENSMUSG00000026005
Kansl1l	-0.0230581168163838	0.909531074704339	-0.0789376796388933	0.793595836215952	ENSMUSG00000026004
Gm37570	0.035288627004376	1	-0.00824912484361864	1	ENSMUSG00000102559
Gm38387	0.0117179355441747	1	-0.0658353029726864	1	ENSMUSG00000102374
Gm38162	-0.0142866383850985	1	0.0154316419964909	1	ENSMUSG00000102776
Gm15789	-0.0137754825283804	1	0.0305567242884808	1	ENSMUSG00000082057
6820402A03Rik	-0.0376735878523523	1	0.00490753171708589	1	ENSMUSG00000103706
Gm37285	0.370740101881893	0.0499779063189828	-0.109613998494263	1	ENSMUSG00000103756
Acadl	0.0703805159648071	0.502001764869652	0.0529771425977788	0.773025997969307	ENSMUSG00000026003
Gm15793	0.150528087999947	1	0.072943137404969	1	ENSMUSG00000082769
Rpl31-ps14	-0.0294449923200006	1	-0.0119152308194503	1	ENSMUSG00000094191
Lancl1	-0.0230505981677758	0.914403592813578	-0.0674751752204492	0.839140356454923	ENSMUSG00000026000
Ikzf2	-0.655614775839988	1.0203267023788e-06	-0.368253496612347	0.0268137258947292	ENSMUSG00000025997
Bard1	-0.355893730532669	0.0106837981278088	-0.00359672869424882	0.991005304133187	ENSMUSG00000026196
Atic	-0.0470879123783063	0.452083724737986	-0.155669140559728	0.00550358631852089	ENSMUSG00000026192
Fn1	0.0738880092987092	0.0300619761292866	-0.297959381810198	5.49593789792692e-23	ENSMUSG00000026193
Apol7d	0.1221347366968	0.575017112911929	0.144158827081104	1	ENSMUSG00000073652
Gm5256	0.0509830898367316	1	-0.0553909919208999	1	ENSMUSG00000100319
Gm8883	-0.120352619050142	1	0.0284164657948172	1	ENSMUSG00000099707
Gm28818	0.17759179196188	0.361249877311504	0.0311724941379929	1	ENSMUSG00000101211
Mreg	0.279772065711578	0.193185945146148	0.0812780137011396	1	ENSMUSG00000039395
D230017M19Rik	0.0859142514481555	0.691386893532012	0.0426123575414202	1	ENSMUSG00000097131
Gm25939	-0.0588380566676434	1	-0.0603765863097878	1	ENSMUSG00000093843
Pecr	0.0420465357517344	0.882909250390223	-0.0252788298635232	0.963569681832138	ENSMUSG00000026189
Tmem169	-0.274597071778671	0.167678106256602	0.0617854345070429	1	ENSMUSG00000026188
Xrcc5	-0.00286641013389457	0.985911988669561	-0.0897121714368027	0.626949568983451	ENSMUSG00000026187
March4	0.0984239437613286	1	-0.01888314587438	1	ENSMUSG00000039372
Smarcal1	-0.152125466420221	0.267419783032108	0.0885202805883277	0.720748906471667	ENSMUSG00000039354
Rpl37a	-0.342135887967749	3.46162809955972e-14	0.000503315107078471	0.997258881119834	ENSMUSG00000046330
Igfbp2	-0.0915560557518342	1	-0.0464210930361322	1	ENSMUSG00000039323
Igfbp5	1.00320254524057	6.97052592313217e-24	0.191702975742584	0.205004088228752	ENSMUSG00000026185
Tns1	0.0998186247047212	0.0688696089278153	0.0424353970547527	0.694356920844487	ENSMUSG00000055322
Rufy4	0.0847015439607249	1	-0.0135305187223146	1	ENSMUSG00000061815
Arpc2	0.113161861102865	0.00655087659170567	0.0047987784790779	0.9686556933293	ENSMUSG00000006304
Aamp	-0.0415426960034001	0.550468401528557	0.066121769354485	0.469701996377157	ENSMUSG00000006299
Pnkd	0.0271910279153657	0.885410035763375	-0.0648137464161936	0.818209880353341	ENSMUSG00000026179
Gm37503	0.113453295120078	1	0.0934594137702617	1	ENSMUSG00000103013
Tmbim1	0.369587548868646	3.73325472307881e-09	0.0945373048472765	0.390072279731718	ENSMUSG00000006301
Gm29358	0.00605172997340515	1	0.0790185331491887	1	ENSMUSG00000099931
Catip	-0.614112218592399	0.00324812741830182	-0.23477231307936	0.534591266498017	ENSMUSG00000073650
Slc11a1	0.189807199466964	1	0.11200159035903	1	ENSMUSG00000026177
Ctdsp1	0.0764233522320903	0.248107841544545	-0.0132893029166353	0.935685491477867	ENSMUSG00000026176
Usp37	-0.055597537766585	0.6075877055743	0.00025501172373928	0.998703242649899	ENSMUSG00000033364
Gm37733	-0.013794212005859	1	0.00489515162460289	1	ENSMUSG00000103227
Rqcd1	0.0328270065737558	0.690163154647758	-0.10708954980693	0.212186639668822	ENSMUSG00000026174
Zfp142	-0.382899074709425	4.29777598606049e-07	0.0279495299371243	0.894891812910518	ENSMUSG00000026135
Bcs1l	-0.426656876226757	0.0126163103392208	-0.216538763239441	0.429818919696888	ENSMUSG00000026172
Rnf25	-0.0217458510681414	0.902262815556389	0.180539035297832	0.272303521515136	ENSMUSG00000026171
Stk36	-0.0729122574232002	0.798040263119442	0.10345289131267	0.821363598148337	ENSMUSG00000033276
Ttll4	0.303644884278326	1.0096152624035e-06	-0.0217347109604246	0.906285124637698	ENSMUSG00000033257
Prkag3	-0.125619988740584	1	-0.234182681795797	1	ENSMUSG00000006542
Nhej1	0.0678840266168119	0.826773180253316	-0.150279535190167	0.74003690729555	ENSMUSG00000026162
Slc23a3	0.0181135937514046	1	0.0606690365846387	1	ENSMUSG00000026205
Cnppd1	0.135580747385607	0.176021233924188	-0.089245256966031	0.609347107288033	ENSMUSG00000033159
Fam134a	0.351378176778328	7.96004616171756e-06	-0.106368287940344	0.462135433671971	ENSMUSG00000049339
Zfand2b	0.021461093828068	0.934626414058844	-0.0480787639199014	0.911767561559083	ENSMUSG00000026197
Abcb6	0.0610002484469234	0.837465760247683	-0.148669528825764	0.726388147752323	ENSMUSG00000026198
Atg9a	0.26886264314949	0.00723296810388288	0.125570676388115	0.457213403673198	ENSMUSG00000033124
Ankzf1	-0.0984890762807632	0.621724212650304	-0.0770228805364971	0.83138163874264	ENSMUSG00000026199
Glb1l	-0.285516126408328	0.0979094606367936	0.298726126638345	0.149219609148326	ENSMUSG00000026200
Stk16	-0.0417593474445309	0.766708545159345	0.00455009989196933	0.985901804679713	ENSMUSG00000026201
Tuba4a	0.171960406877344	0.0270074691556521	-0.179260955918848	0.0545639914456868	ENSMUSG00000026202
Dnajb2	0.0838963565675046	0.490007320000916	0.0291784719389562	0.911277426910183	ENSMUSG00000026203
Ptprn	-0.807445408869931	6.75394720916667e-18	-0.23020183460152	0.0433196061656832	ENSMUSG00000026204
Dnpep	-0.310128728078819	4.01854315281573e-05	0.0172374124709131	0.937113452743781	ENSMUSG00000026209
Speg	-0.0715914666631087	0.462419441263557	-0.194932571548244	0.0397320786724945	ENSMUSG00000026207
Gmppa	0.115444403916999	0.311520092794868	-0.0497649282064021	0.832812867733017	ENSMUSG00000033021
Chpf	-0.125922472894563	0.34557271607397	0.0770302839793583	0.748920140880788	ENSMUSG00000032997
Obsl1	-0.625993660856895	1.37347677530576e-13	-0.277826600123815	0.00392472588941719	ENSMUSG00000026211
Tmem198	0.0806282287881679	0.758323908204149	0.0224651136871377	1	ENSMUSG00000051703
Inha	-0.057914821938739	0.853207269336704	-0.0459585598201405	0.938122939194665	ENSMUSG00000032968
Stk11ip	0.501673362656369	3.19971252507253e-05	0.264078602735291	0.127978969043104	ENSMUSG00000026213
Slc4a3	-0.346812978992714	0.0385318665444184	0.146730114256198	0.627177433255311	ENSMUSG00000006576
Epha4	-0.411799666882687	0.0355222675192983	0.0429695556654834	0.934569573571524	ENSMUSG00000026235
Pax3	-0.0197713930424784	0.953888986199305	0.307720611830305	0.343731611937133	ENSMUSG00000004872
Farsb	0.174359481007424	0.00999865785330668	-0.170471060327653	0.0384987579193202	ENSMUSG00000026245
4833412K13Rik	-0.0183283920770068	1	0.270046473215141	1	ENSMUSG00000104018
Acsl3	-0.0913779611015266	0.235125507006314	0.0512113087541554	0.71814104383618	ENSMUSG00000032883
Utp14b	0.380279457825242	9.52490787260587e-05	-0.166372237304534	0.294773835221379	ENSMUSG00000079470
Gm6159	0.125783248832242	0.572579192551548	-0.0641858626806827	1	ENSMUSG00000099377
Kcne4	-0.028438979917535	1	-0.00963346977945685	1	ENSMUSG00000047330
Gm5830	0.0687263958902268	1	-0.0389227498484541	1	ENSMUSG00000072978
Ap1s3	0.111018515481821	0.664716542151289	0.0866835904209593	1	ENSMUSG00000054702
Wdfy1	-0.233678019852162	0.0502781404829368	0.0195102667724225	0.954803443311064	ENSMUSG00000073643
Mrpl44	0.432095567592744	0.00111207328803545	0.0144189113237363	0.970116586471181	ENSMUSG00000026248
Serpine2	-0.501947742984765	0.019308480019364	0.262709090211481	0.457213403673198	ENSMUSG00000026249
Gm5529	0.103267275190804	0.675406393662591	-0.199980116250971	1	ENSMUSG00000067106
Cul3	0.113950017623021	0.0517655888137524	0.110889261304027	0.133740489365222	ENSMUSG00000004364
Gm37902	-0.120963357857013	0.585651218449463	-0.0165916727517948	1	ENSMUSG00000103076
Irs1	-0.347496099962738	1.32051854001228e-08	-0.11133358652018	0.231688370976886	ENSMUSG00000055980
Rhbdd1	0.614304906263025	2.72963643574636e-14	0.0308312154140935	0.905634792196237	ENSMUSG00000026142
Gm19552	0.0848026093679847	1	-0.096341183730833	1	ENSMUSG00000104493
Col4a4	0.101794826244107	0.66925439955037	-0.0547666567053044	1	ENSMUSG00000067158
Col4a3	-0.0489768609668571	1	-0.00946126152158926	1	ENSMUSG00000079465
C430014B12Rik	0.0915827326553771	1	-0.0894950217427657	1	ENSMUSG00000097564
Mff	0.0911517310747812	0.246137655305609	0.0514525772919861	0.728089931203245	ENSMUSG00000026150
Gm28941	-0.0741342599777073	0.806383666132876	0.010644149054366	0.985800323756329	ENSMUSG00000101450
Agfg1	0.399823187892817	4.87321430896862e-14	0.106192553915043	0.209634298172865	ENSMUSG00000026159
Pid1	-0.429533272872464	0.0504244962254234	0.128123962403857	0.783443569941589	ENSMUSG00000045658
Dner	0.284975499922072	1	0.0570713466516778	1	ENSMUSG00000036766
Trip12	0.120677236052676	0.000548317132129242	0.0468210813218497	0.434335214700501	ENSMUSG00000026219
Fbxo36	-0.184819556436981	0.482117719755027	0.320897475687486	0.31720120911569	ENSMUSG00000073633
Rpl19-ps1	-0.179746253906186	0.41898219446625	-0.032854820559429	1	ENSMUSG00000064281
Gm16092	-0.110230339116757	1	0.0368354852692994	1	ENSMUSG00000089714
Sp100	0.059431389141535	1	0.0340532450841489	1	ENSMUSG00000026222
A630001G21Rik	-0.369882037672916	0.0763302709753433	0.150859348853914	1	ENSMUSG00000052760
Cab39	0.147445571881275	0.00920332240960504	0.0283345826413447	0.835171508466144	ENSMUSG00000036707
Itm2c	0.0938912997556906	0.209843234301269	0.0701188289877269	0.560073044684685	ENSMUSG00000026223
Gm18180	-0.0171383091313686	0.95284010812121	0.14963778022884	1	ENSMUSG00000099342
Psmd1	0.131230526016217	0.00127415594951306	0.0202462472718766	0.839637685990677	ENSMUSG00000026229
Htr2b	0.109756587752602	1	-0.140880536520601	1	ENSMUSG00000026228
Gm37914	-0.0282335792161398	0.916597671358717	-0.0743386901109748	1	ENSMUSG00000103272
Armc9	-0.072844258490232	0.735882584470157	0.0577722057998699	0.889289830344408	ENSMUSG00000062590
Ncl	-0.138613793097138	2.59068923195048e-07	-0.136720424872718	1.29460454181799e-06	ENSMUSG00000026234
C130036L24Rik	0.093715673262466	0.745156186900696	-0.109006669633378	0.824363805534952	ENSMUSG00000073627
Ptma	-0.332725462983861	4.71287118410369e-32	-0.0804417820430134	0.0269514624232936	ENSMUSG00000026238
Pde6d	0.0916273822436351	0.528319715463243	0.119062939668375	0.573244446582754	ENSMUSG00000026239
Cops7b	-0.0225813468767414	0.895288030938169	0.0340567236364289	0.908199473783791	ENSMUSG00000026240
Dis3l2	0.258390289138283	0.185513606456854	0.0564879718976912	0.905634792196237	ENSMUSG00000053333
Gm6136	-0.214535488657582	0.301532497325921	0.074299228833383	0.866948259665145	ENSMUSG00000084106
Gm37447	-0.0584675024776452	1	0.0750109621654716	1	ENSMUSG00000103984
Prss56	0.0104770775584952	1	0.057403034864874	1	ENSMUSG00000036480
Eif4e2	0.125396955225058	0.0558607821376493	0.0619941983640298	0.599190978721628	ENSMUSG00000026254
Efhd1	0.101122193383329	0.661343073789594	0.017258612229107	1	ENSMUSG00000026255
Gigyf2	0.00112578890994298	0.990745823116789	-0.0241078886761557	0.86846532514499	ENSMUSG00000048000
Ngef	-0.07853405815359	0.653016981647002	0.384418485947857	0.0047945753850879	ENSMUSG00000026259
Atg16l1	0.152372113459702	0.150594187241105	0.093441112837416	0.603880277947985	ENSMUSG00000026289
Scarna6	0.157150419572109	1	0.0110471961723431	1	ENSMUSG00000089281
Sag	0.0748385823592563	0.799414709812428	0.0485877738654371	0.931649248841969	ENSMUSG00000056055
Dgkd	0.44450450239412	2.66574872724103e-10	-0.114610002640476	0.35968178191417	ENSMUSG00000070738
Usp40	-0.184813017391703	0.048086245967495	-0.0303493920828975	0.899834456862257	ENSMUSG00000005501
Ugt1a7c	0.543008238789706	0.00493588754006405	0.430940803895846	0.0784918070544993	ENSMUSG00000090124
Ugt1a6a	-0.091340528743704	1	0.12430504677273	1	ENSMUSG00000054545
Hjurp	-0.255572261454435	1.24798776800937e-11	0.00556421019256697	0.963372534056654	ENSMUSG00000044783
Glrp1	0.144274645948757	0.548680889654361	0.00498569364065625	1	ENSMUSG00000062310
Gm19589	0.00148599631633433	1	0.00945157752897777	1	ENSMUSG00000100798
Arl4c	0.246477760711459	0.000199261310463847	0.0134946782521895	0.947012822640665	ENSMUSG00000049866
Sh3bp4	-0.026142971609151	0.801326517455349	-0.337129259304646	2.54930906344972e-06	ENSMUSG00000036206
Agap1	0.325928997150532	1.19278338671629e-06	-0.152932009290146	0.115315095185689	ENSMUSG00000055013
Gbx2	-0.0337435004204467	1	-0.0882903982692597	1	ENSMUSG00000034486
D130058E05Rik	-0.104386389068768	1	-0.0646137877661858	1	ENSMUSG00000092627
Ackr3	0.501900376085015	0.000268828519590694	0.77839306288798	1.3056767407455e-08	ENSMUSG00000044337
Gm35048	-0.0264035928032373	0.918682932387595	0.019318616012889	1	ENSMUSG00000103292
Cops8	-0.103073173426545	0.182848780378778	0.0651123026273787	0.61923782471556	ENSMUSG00000034432
Col6a3	-0.27113593818789	5.50343419519403e-24	-0.206594444761264	1.49421770226095e-13	ENSMUSG00000048126
Mlph	0.0394056170008518	0.882508699030862	0.106790688511314	1	ENSMUSG00000026303
Lrrfip1	0.356708108228688	1.06639129582343e-22	-0.130947663190725	0.00412594937787164	ENSMUSG00000026305
Ramp1	0.0969949884689425	1	-0.0377615343737565	1	ENSMUSG00000034353
Ube2f	0.113007936131148	0.214737045868384	-0.0250240250640665	0.908503107410641	ENSMUSG00000034343
Gm7785	0.0258316875203584	0.928838051864593	-0.189264610014227	1	ENSMUSG00000083064
Scly	1.07824812228669	6.2742066953276e-12	0.0874746549345842	0.836499651572169	ENSMUSG00000026307
Klhl30	1.35989353211292	2.31972049658218e-13	0.0122326758722776	0.98223530999151	ENSMUSG00000026308
Fam132b	2.14656738901619	3.91937118731255e-37	-0.354049449017781	0.213775746179025	ENSMUSG00000047443
Ilkap	0.0493921123936049	0.679063219868647	-0.0791281308380777	0.647277728637785	ENSMUSG00000026309
Hes6	0.0912878263725993	0.745693556786522	-0.00412605417446448	0.993080845509653	ENSMUSG00000067071
Per2	-0.0951582508533578	0.632239066516156	-0.00243318412619498	0.994518871839968	ENSMUSG00000055866
Traf3ip1	-0.130976163968102	0.378362755674954	0.128330565189253	0.562437073205731	ENSMUSG00000034292
Asb1	0.324920190743851	0.0214061942340975	0.260914273113838	0.168640379117756	ENSMUSG00000026311
Gm29100	0.0537162664873285	0.863977528125274	0.334779435224205	0.270665966844509	ENSMUSG00000100980
Twist2	0.143614248428759	0.291086375526019	0.147892777066208	0.440437332639281	ENSMUSG00000007805
Gm29101	-0.0547074354883732	0.825059631698098	-0.237239286619694	1	ENSMUSG00000101414
Hdac4	0.0935368709809443	0.400661386387887	0.111618294175136	0.4773719824192	ENSMUSG00000026313
Ndufa10	-0.0306233059485242	0.766127780745943	0.0617166191815847	0.670939763460934	ENSMUSG00000026260
Myeov2	-0.233443530131078	0.062994489279939	0.169964910988656	0.349194249493025	ENSMUSG00000073616
Gpc1	0.628604834694949	1.0632049462471e-39	0.512031419080092	8.0789223643713e-26	ENSMUSG00000034220
Ankmy1	0.162630470728512	1	-0.0173910440828912	1	ENSMUSG00000034212
Dusp28	0.043084733957402	0.892313698283604	0.0727191574669942	0.897639769150232	ENSMUSG00000047067
5033417F24Rik	0.0402667310599449	1	-0.0357015959859829	1	ENSMUSG00000097251
Rnpepl1	0.930179361126473	2.73458497907081e-22	-0.0608537632799707	0.812194313922427	ENSMUSG00000026269
Capn10	0.239447076798016	0.093190602046789	-0.201870966312344	0.328660247371803	ENSMUSG00000026270
Gpr35	0.0697500320108998	0.778284227390192	-0.123735125050704	1	ENSMUSG00000026271
Kif1a	-0.536323604343049	0.0062704504837738	-0.00634515425289746	1	ENSMUSG00000014602
Crocc2	-0.201759184547099	0.391442612821708	0.0870412578542299	1	ENSMUSG00000084989
Sned1	-1.18528208758257	2.23851968458035e-43	0.213728438505594	0.050450885031253	ENSMUSG00000047793
Mterf4	-0.0297244644274346	0.901954546230978	-0.0531225290786893	0.898917581385343	ENSMUSG00000026273
Gm28535	-0.0776382885783346	1	-0.0385751022542094	1	ENSMUSG00000101172
Gm7867	0.00664193357111138	1	0.0477432953389957	1	ENSMUSG00000100351
Pask	-0.0681578006789155	0.649225844662902	-0.00630418081979398	0.984064379206663	ENSMUSG00000026274
Ppp1r7	0.164828775076267	0.0398879652604912	0.0899341324628531	0.508766095367603	ENSMUSG00000026275
Hdlbp	0.0803768607246676	0.011818088317377	-0.0934675183856871	0.00857192402775191	ENSMUSG00000034088
Sept2	0.417759850272017	4.13400452556236e-37	-0.0663168529117975	0.216427786052492	ENSMUSG00000026276
Farp2	-0.0462157558263345	0.756767051157158	-0.0361197802060903	0.899698616100072	ENSMUSG00000034066
Stk25	0.000595710033691807	0.995780493064093	0.0111547519568724	0.95770398518448	ENSMUSG00000026277
Bok	-0.717916557109835	1.80119448218038e-11	0.0228070624765032	0.941101230742032	ENSMUSG00000026278
Thap4	-0.0387880114084346	0.790106149217351	-0.0354725953097868	0.897745804819173	ENSMUSG00000026279
Atg4b	-0.190142151754309	0.0335875737615839	-0.14265075664276	0.247369970215805	ENSMUSG00000026280
Dtymk	-0.114162636885336	0.244988787375242	-0.0350698030263202	0.866884781801685	ENSMUSG00000026281
Ing5	0.0480281643672165	0.713350455271449	-0.0269109404851817	0.918311585382685	ENSMUSG00000026283
D2hgdh	-0.0939930386078887	0.653391759375187	0.293375751154531	0.180873079122919	ENSMUSG00000073609
Gm7895	0.11560193047938	0.573097956950041	-0.00202267272811444	1	ENSMUSG00000100347
Fam174a	-0.209498052388035	0.333429186699268	0.284461978600404	0.302843131540749	ENSMUSG00000051185
BC055308	-0.0118832991506437	1	-0.0209475964317233	1	ENSMUSG00000103973
Gm15427	-0.190276738145419	0.138073141799343	0.0255872910450147	0.937781524959689	ENSMUSG00000081051
Gm22360	0.0677430330111805	1	0.0137581376599312	1	ENSMUSG00000095955
Gm6430	-0.0449156590342467	0.86233553700117	-0.0385077783859	1	ENSMUSG00000044757
D1Ertd622e	0.0846261847755759	0.573961064212634	0.11650818149353	0.593029538101012	ENSMUSG00000044768
Ppip5k2	0.242588406510227	0.000664525160833505	-0.12808864884505	0.232530936837787	ENSMUSG00000040648
Gin1	0.0258143619244766	0.932824986830718	-0.00484646450339589	0.991442298349315	ENSMUSG00000026333
Pam	-0.198395994915605	6.98850752004878e-05	0.235305544577741	2.77534836410024e-06	ENSMUSG00000026335
Gm37140	-0.0934433285901721	1	0.0546119464836826	1	ENSMUSG00000104140
Gm3531	-0.00258562285281318	0.993318940038224	-0.212300545487706	0.55542252942981	ENSMUSG00000089782
B230216N24Rik	-0.121238479100563	0.655753372802692	-0.0950017153057248	0.847551700155537	ENSMUSG00000089706
Gm3555	0.0856578251667008	1	-0.0977203775163137	1	ENSMUSG00000089791
Tdpx-ps1	-0.0491532297300447	1	0.0357069179478316	1	ENSMUSG00000082431
Gm29668	0.0777600129538989	1	0.0285418277745046	1	ENSMUSG00000099835
Gm29667	-0.0874175913062301	1	-0.0941073990835042	1	ENSMUSG00000100794
Gm28187	0.145520712874576	0.562437374230037	-0.020876158790768	1	ENSMUSG00000099375
Rnf152	-0.0282915949195812	1	0.0340491910549709	1	ENSMUSG00000047496
Gm3608	0.0406258935537879	0.894542875556791	-0.0161955057001363	0.976012704610946	ENSMUSG00000067017
Pign	0.19802045656076	0.00383720512175406	0.0426709307500105	0.787803829413477	ENSMUSG00000056536
2310035C23Rik	0.159798193952851	0.121507798396974	0.0573613382752906	0.786895986191867	ENSMUSG00000026319
Gm10193	0.0102516701185438	1	0.0553813113680482	1	ENSMUSG00000101330
Tnfrsf11a	-0.623228493999901	0.000442955112149207	-0.504431253352054	0.0126935714703451	ENSMUSG00000026321
Gm7160	0.160944288446579	0.550551179758521	0.128191405828823	0.787803829413477	ENSMUSG00000099843
Zcchc2	0.171960295254662	0.0243644574628455	-0.0845821059855571	0.529172925285846	ENSMUSG00000038866
Gm26509	0.0486642343102386	1	0.049832540955302	1	ENSMUSG00000097612
Gm20753	-0.0120206415277741	1	0.0310064586847593	1	ENSMUSG00000101583
Phlpp1	-0.213203858552036	0.00653943649883331	0.0166465105540833	0.938648610544892	ENSMUSG00000044340
Gm38235	-0.117833468707176	1	0.0275785930717657	1	ENSMUSG00000103291
Bcl2	-0.156283007119921	0.265057230826566	-0.161493360814488	0.429109585896616	ENSMUSG00000057329
Kdsr	0.126711855035971	0.245612624476522	-0.0177892284583992	0.949857020975343	ENSMUSG00000009905
Vps4b	0.50473721079434	1.09195678112201e-19	0.116202683734214	0.178011932643253	ENSMUSG00000009907
Serpinb2	-0.409860421918961	0.0557135546065926	-0.222509662984997	0.526056652874474	ENSMUSG00000062345
Serpinb8	-0.747205368510836	5.29208606541244e-06	0.379627416620576	0.062881418233626	ENSMUSG00000026315
Dsel	-0.263577308612256	0.0230806453549685	0.284261165449228	0.0255580637448766	ENSMUSG00000038702
Tsn	-0.208878150090142	0.000267442066314537	-0.0990317564526133	0.235607078691629	ENSMUSG00000026374
Nifk	0.0157783604040722	0.879030128642454	-0.0498833677111659	0.727505676217358	ENSMUSG00000026377
Clasp1	0.130358149453146	0.0197070598933539	0.0612060349946867	0.532462856460444	ENSMUSG00000064302
Gm22710	0.00802976257553819	1	0.0263355277445949	1	ENSMUSG00000080542
Tfcp2l1	0.235215145946244	0.273102249275599	-0.111479250882838	1	ENSMUSG00000026380
Gli2	0.493416346904595	7.92999452045657e-06	1.59351632384235	2.77129334527546e-63	ENSMUSG00000048402
Inhbb	-0.284413546282432	0.176331871947981	-0.288179705048753	0.316506567247457	ENSMUSG00000037035
Ralb	0.226917790894314	0.00158657452573328	-0.0613747243973969	0.685878991411537	ENSMUSG00000004451
Tmem185b	0.00459188594894102	0.986173791938114	-0.176884052378193	1	ENSMUSG00000098923
Epb41l5	-0.0993469543628577	0.565575023912783	-0.285291233783609	0.102517676603051	ENSMUSG00000026383
Ptpn4	0.502434313598324	9.42321943974528e-08	-0.0160109180093637	0.96027027345214	ENSMUSG00000026384
Tmem177	-0.0330953088312563	0.904841214836304	-0.00530836951500311	0.990617779119755	ENSMUSG00000036975
Tmem37	0.557453939925957	0.00721972847110204	0.0467373126467813	0.936646453507372	ENSMUSG00000050777
Dbi	-0.269309135236613	1.54289554969428e-06	0.0146366703554825	0.927375571694049	ENSMUSG00000026385
3110009E18Rik	0.274573245677677	0.256363749668505	0.0188483301762395	0.97471903456892	ENSMUSG00000026388
Steap3	-0.205954718308042	0.0297102875367294	-0.107633150127423	0.483609409353917	ENSMUSG00000026389
En1	-0.170619796501469	0.235029852263034	-0.0497086112638309	0.874814372134982	ENSMUSG00000058665
Insig2	0.800421949653847	1.20917842781879e-31	-0.00674118304471118	0.976526284378474	ENSMUSG00000003721
Gm37174	0.0186603274922278	0.948367738043832	-0.0379858151140814	1	ENSMUSG00000104253
2210011K15Rik	0.500409991507854	0.0152237677800511	-0.188739592432032	0.62238474120278	ENSMUSG00000101791
Ccdc93	-0.102915502412415	0.179449128736552	-0.145860527615445	0.0981382659370821	ENSMUSG00000026339
Ddx18	-0.00821978178367477	0.938551119648179	-0.194668572795006	0.00909268149319454	ENSMUSG00000001674
Actr3	0.0109867688577003	0.819209649496521	-0.0766979841147332	0.0586644075393931	ENSMUSG00000026341
Slc35f5	0.301644589875495	0.000777499347711285	0.0246614885241028	0.923967774494242	ENSMUSG00000026342
Gpr39	0.643500228478871	0.00114305046907332	0.325115544969873	0.289753171813728	ENSMUSG00000026343
Nckap5	0.36361848869003	0.0552553851390563	-0.128155532256467	1	ENSMUSG00000049690
Mgat5	-0.145870984408529	0.262555600192819	0.174456409067876	0.28776369465292	ENSMUSG00000036155
Gm8451	-0.0169841380411954	0.960594080597559	-0.0372821581195774	0.9515889948849	ENSMUSG00000099471
2900009J06Rik	-0.00433531720192397	1	-0.00757414750967581	1	ENSMUSG00000102014
Ccnt2	0.122343054581517	0.17005962263038	0.106799620332603	0.431427316344017	ENSMUSG00000026349
Map3k19	0.0362533711182216	1	0.118149845559138	1	ENSMUSG00000051590
Rab3gap1	-0.00215674027080727	0.98677909845488	0.0794239324370486	0.589612626814787	ENSMUSG00000036104
Zranb3	-0.125381744397449	0.470568332227171	0.00304142386898075	0.992511557680643	ENSMUSG00000036086
Gm38248	-0.12908082478465	0.639792491761311	0.00149720699197088	0.997635780592045	ENSMUSG00000104164
Rpl28-ps1	-0.157162718334138	0.562382534480341	-0.104895292828133	0.835469314021925	ENSMUSG00000058603
R3hdm1	0.0751444914403677	0.287322359620576	-0.0607361334917934	0.599399622640167	ENSMUSG00000056211
Ubxn4	0.201859540461427	8.06804795680173e-05	0.0449289441946199	0.683869019989528	ENSMUSG00000026353
Lct	0.087923298735079	0.736515563981713	0.124091473299999	1	ENSMUSG00000026354
Mcm6	-0.192111798620303	2.69733072655288e-06	-0.111983308569878	0.0253902207006892	ENSMUSG00000026355
Dars	-0.0346312756050818	0.667909052116876	-0.114297970288643	0.162142029760593	ENSMUSG00000026356
Gm6170	-0.131298620813163	0.636169116393138	0.0361147120790071	0.953597008026681	ENSMUSG00000100078
Cxcr4	-0.0609311380493324	1	-0.0437038905494768	1	ENSMUSG00000045382
Gm15790	0.0381208255249125	1	0.0561005015638137	1	ENSMUSG00000089648
Pfkfb2	-0.197402030893645	0.347444900890371	0.0439202046640286	0.929436908276893	ENSMUSG00000026409
Yod1	0.429443680781295	0.00212387081200748	-0.0121943457736794	0.975405735116381	ENSMUSG00000046404
AA986860	-0.306660963472942	0.185198592694661	0.041610991408844	0.944816067199621	ENSMUSG00000042510
Mapkapk2	-0.0196433905084561	0.792960018228821	-0.0628514238047799	0.476369522087905	ENSMUSG00000016528
Gm37084	-0.0282419511087707	0.909335843617276	-0.0520273090099574	1	ENSMUSG00000102856
Dyrk3	-0.00490268675050613	0.986994898152985	-0.540223163855518	0.00894927584600467	ENSMUSG00000016526
Eif2d	-0.17506619526487	0.105092197510962	-0.17419538209484	0.207480603810804	ENSMUSG00000026427
Rassf5	0.732220906952954	1.91128651428096e-09	0.713307949996533	1.95204306461036e-08	ENSMUSG00000026430
Ikbke	0.381866541378548	0.0297993240900712	0.302836534363261	0.213728713220081	ENSMUSG00000042349
Srgap2	0.125238218251909	0.0998062115535648	-0.0521149167393927	0.738109514684424	ENSMUSG00000026425
Gm29488	0.0247165037120129	1	-0.0107982485020139	1	ENSMUSG00000101778
Fam72a	-0.00709097200149866	0.982305480944391	0.0915573665521209	0.850394770949471	ENSMUSG00000055184
Rab7b	0.340586526961897	0.00664578600495548	0.691580303143576	7.83125656220533e-09	ENSMUSG00000052688
Slc41a1	-0.216860235124999	0.0169661829105113	0.116891710624857	0.405027540771231	ENSMUSG00000013275
Rab29	-0.327456719100354	0.12289011646213	-0.0618233540450481	0.90645063804257	ENSMUSG00000026433
Nucks1	-0.113450747830496	0.0110674002720118	0.0347926801625817	0.703011691456203	ENSMUSG00000026434
Gm38067	-0.0721588128377448	0.753790295129857	0.0373798348915866	1	ENSMUSG00000103569
Slc45a3	-0.299329306623045	0.207843182024718	-0.174956126684331	0.683795326916482	ENSMUSG00000026435
Elk4	0.0801169741613359	0.400513502985965	-0.0804129831787223	0.591211459994325	ENSMUSG00000026436
Gm37120	-0.0372836381789696	1	0.186690696535088	1	ENSMUSG00000103966
Cdk18	0.176038027968531	0.161085594050332	-0.135058211703658	0.507909788114903	ENSMUSG00000026437
Gm29630	0.0723982040663016	0.815074867462856	0.0695006206549396	0.903984736735322	ENSMUSG00000101549
Klhdc8a	-0.107084914075943	0.285175723253609	0.174147266453014	0.114672626298254	ENSMUSG00000042115
Nuak2	0.187984749155102	0.121410122448237	-0.0747104367707615	0.76778776348141	ENSMUSG00000009772
F730311O21Rik	0.59528559591267	0.000206490435731272	-0.0247830779784531	1	ENSMUSG00000100658
Tmcc2	-0.212832104353079	0.0916586576364814	-0.0282356423652762	0.92719322447548	ENSMUSG00000042066
Dstyk	0.207875871451196	0.0356870095729463	0.268294656871542	0.0131971091911166	ENSMUSG00000042046
6030442K20Rik	-0.00139021584063495	0.996412700408444	-0.121687762589733	1	ENSMUSG00000097760
Rbbp5	0.0467544549583088	0.674366018121138	-0.0281816344954205	0.899532604225282	ENSMUSG00000026439
Tmem81	0.165872273214482	0.512599618721613	0.185635755668696	0.637205697683573	ENSMUSG00000048174
Mdm4	0.432613538615279	1.79556743788359e-12	0.00675933824336316	0.97180984939016	ENSMUSG00000054387
Gm29257	-0.0815511460613595	1	0.0594500584949259	1	ENSMUSG00000100228
Pik3c2b	-0.350204223645569	0.0455662807019263	-0.346546250089255	0.110979503684477	ENSMUSG00000026447
Gm26616	0.12540511365161	0.49432980836761	-0.117703601518067	1	ENSMUSG00000102425
Ppp1r15b	0.262484319446021	1.26567503014847e-08	-0.166305242084105	0.00290034037241057	ENSMUSG00000046062
Plekha6	-0.127712837759565	0.651189874467607	0.092719662491946	0.861471964225618	ENSMUSG00000041757
Etnk2	-0.0839502527822678	1	0.0292973210614538	1	ENSMUSG00000070644
Sox13	0.589675741906598	0.00462721012281286	-0.0924988550416762	0.861349344480713	ENSMUSG00000070643
Snrpe	-0.226908515247709	0.00334510838713091	-0.0827468497701676	0.55256201076852	ENSMUSG00000090553
Zc3h11a	-0.0836015664541884	0.565496017246471	0.290662835220215	0.0328050206302173	ENSMUSG00000102976
Gm38394	0.108689030295886	0.574938969069099	0.101110368790658	0.755315274036767	ENSMUSG00000094410
Lax1	-0.0192367194979954	1	-0.100308207138498	1	ENSMUSG00000051998
Atp2b4	-0.402146703611427	9.369848263313e-10	-0.178359410645624	0.0340322412852344	ENSMUSG00000026463
Optc	-0.867921700648323	3.67958886094886e-06	-0.613020726265567	0.00435918019494995	ENSMUSG00000010311
Prelp	-0.482720726068946	0.0216153530120594	0.491461024582176	0.0432371888132611	ENSMUSG00000041577
Fmod	-0.103683143913235	1	0.0562204589255493	1	ENSMUSG00000041559
Btg2	0.898313634597377	1.0080581589913e-16	-0.237570932396763	0.171408091225046	ENSMUSG00000020423
Chil1	-0.0143768613468035	1	0.0766756541415928	1	ENSMUSG00000064246
Adora1	-0.0368377828793627	1	0.0355824073278881	1	ENSMUSG00000042429
Ppfia4	-0.187746642838521	0.396229516545723	-0.0401452615157236	1	ENSMUSG00000026458
Tmem183a	0.221531590824907	0.000703056406486587	0.00318562914066882	0.986238677832759	ENSMUSG00000042305
Cyb5r1	0.307199786015191	6.8338697168566e-09	-0.232996404013351	0.000243769186806359	ENSMUSG00000026456
Adipor1	0.420944452384521	5.32262313223617e-20	-0.00122965785656377	0.992072966097841	ENSMUSG00000026457
Klhl12	-0.191237380420871	0.138218269779386	0.063330055901945	0.814111978353971	ENSMUSG00000026455
Rabif	0.145606864826619	0.182046142160827	-0.0517590814768891	0.82163627892353	ENSMUSG00000042229
Kdm5b	-0.221268144491208	0.0143797119243131	-0.136843042249094	0.296250442050402	ENSMUSG00000042207
Ppp1r12b	0.0846625425083234	0.252401478411772	0.0193557504616744	0.913527043010166	ENSMUSG00000073557
Gm37949	-0.00940018660583048	1	-0.0788803410374842	1	ENSMUSG00000103614
Gm37677	-0.245462340616284	0.236906741291464	-0.164242209344338	1	ENSMUSG00000103976
Ube2t	0.281030401848273	0.103930371053179	0.0709703641216357	0.861662422476896	ENSMUSG00000026429
Lgr6	0.64452405262249	0.00195798204686995	0.112269201239147	0.820304639798824	ENSMUSG00000042793
Ptprv	-0.230680076416169	0.176605279801359	0.00402600310125169	1	ENSMUSG00000097993
Arl8a	0.268592611179457	0.000137263921927051	0.0300237858154699	0.874814372134982	ENSMUSG00000026426
Gm15445	0.148379886453708	0.499302160611792	0.0531435043331044	1	ENSMUSG00000085311
Gm4204	-0.320475015852314	0.00173028667406817	-0.102946038840833	0.587279773350084	ENSMUSG00000079139
Rnpep	0.0739637473690581	0.538309296543307	-0.214935214912059	0.0716127526376788	ENSMUSG00000041926
Timm17a	0.118586693177684	0.0846452315494077	0.0833388336751788	0.446239706569422	ENSMUSG00000062580
Lmod1	-1.32817378464281	2.07605452881302e-34	-0.872621095736301	1.68939063843235e-15	ENSMUSG00000048096
Shisa4	-0.0641944411217378	0.601241073176799	0.0641402528151883	0.754241589867145	ENSMUSG00000041889
Ipo9	0.0185037561962585	0.75276637883673	-0.0583635825782325	0.386378159661006	ENSMUSG00000041879
Nav1	0.183382520039185	0.00326148972392952	0.142827938925818	0.0714440748870551	ENSMUSG00000009418
Gm38399	0.164328755105083	0.521397816896542	0.349447739849676	0.233625377046857	ENSMUSG00000090399
Csrp1	-0.337702581476459	3.59316878978647e-17	-0.067293879448694	0.305862374222702	ENSMUSG00000026421
Phlda3	-0.409080038999958	0.000524463210650633	0.190638967269428	0.239400911892848	ENSMUSG00000041801
Tnni1	-0.058202231046125	1	0.00213818978190312	1	ENSMUSG00000026418
Lad1	0.127178135958002	1	0.118462908663175	1	ENSMUSG00000041782
Tnnt2	1.150407150338	2.5535042151528e-09	0.538303449242566	0.0311525670408544	ENSMUSG00000026414
Pkp1	0.121234332595027	0.641331696956563	0.0657919734439685	1	ENSMUSG00000026413
Tmem9	-0.4265803281145	1.07981563537513e-05	0.0169368871878269	0.953597008026681	ENSMUSG00000026411
Gm15850	-0.053544202164413	0.848191301771948	0.00286283702136105	1	ENSMUSG00000086264
Kif21b	0.666804625012302	3.65227274251367e-13	-0.49345337215803	8.9418237151705e-06	ENSMUSG00000041642
5730559C18Rik	-0.543659280713904	0.00869123811385898	0.0704135754719837	0.897745804819173	ENSMUSG00000041605
Camsap2	-0.0204808654701966	0.808537415579449	-0.0177083057904908	0.909709935822873	ENSMUSG00000041570
9230116N13Rik	-0.135590477477569	0.495208171105588	-0.0990804643067224	1	ENSMUSG00000097403
Ddx59	-0.0830165535012354	0.690674960633373	-0.0957740290403381	0.780840504685758	ENSMUSG00000026404
Kif14	0.011154714937044	0.938774503512172	0.0533609459394127	0.790528353898352	ENSMUSG00000041498
Gm29485	-0.0388237372298689	1	0.0815460315361874	1	ENSMUSG00000101413
Zfp281	-0.0975855687480659	0.332944967324656	-0.119437571201304	0.382419149147213	ENSMUSG00000041483
Gm19705	0.490109286179856	0.0236547954771132	0.215404548057033	0.583816627798059	ENSMUSG00000097113
Platr22	-0.000548601879647237	1	-0.00565545066327072	1	ENSMUSG00000097448
Gm4258	-0.00249434271984515	1	-0.0617753275749972	1	ENSMUSG00000098243
Gm37534	0.108854622418901	1	0.0527217329724664	1	ENSMUSG00000103427
A430106G13Rik	-0.0137973891510938	0.957584419865426	-0.0524533613133492	1	ENSMUSG00000098206
Nek7	0.0493474389304632	0.440267860420108	0.258305900797212	3.09135188046032e-07	ENSMUSG00000026393
Lhx9	-0.276021609693158	0.221139666017063	0.180136788623643	0.651315425178136	ENSMUSG00000019230
2310009B15Rik	-0.0033759315727874	0.991775539762499	0.232070631937487	0.513640620786798	ENSMUSG00000079283
Dennd1b	0.835444111929475	1.61622125186765e-15	0.0858305468756525	0.744807876941936	ENSMUSG00000056268
Gm37718	0.136754409321261	1	0.00609922840513659	1	ENSMUSG00000102243
Zbtb41	0.23314143638982	0.00097519523612447	0.0408889054657786	0.80938633311023	ENSMUSG00000033964
Aspm	-0.0775965335242144	0.247410362999595	0.0741152062743095	0.447310726444142	ENSMUSG00000033952
Gm5837	0.235089630030202	0.334603244216132	0.0740347333874891	0.894774931675029	ENSMUSG00000104496
Cfh	0.0161531659435992	0.961899070687249	0.433187208477725	0.107413494753939	ENSMUSG00000026365
Kcnt2	0.290039601075879	0.192350564342511	0.11273091087895	0.807998461565216	ENSMUSG00000052726
Gm5835	0.00427911553343326	0.99027715572891	-0.0326593500805965	0.958095330456932	ENSMUSG00000101795
Cdc73	-0.131756771384173	0.0689671526684177	-0.0492048887088636	0.735085810317329	ENSMUSG00000026361
Gm6397	0.0419565607402333	1	-0.088055634642443	1	ENSMUSG00000089640
Glrx2	-0.386618371213475	0.00519355708949708	0.268856467607903	0.120924353494914	ENSMUSG00000018196
Trove2	0.154483699434924	0.0375875805240898	0.0434776449691517	0.791481490881622	ENSMUSG00000018199
Uchl5	0.000613776381249955	0.996412700408444	-0.0654631533512774	0.717075395481121	ENSMUSG00000018189
Gm29170	-0.0176184690353937	0.959347091460495	0.067772509680344	0.90645063804257	ENSMUSG00000100455
Rgs2	-0.488056700242058	0.0238878600989553	0.159980411809116	0.714584727595754	ENSMUSG00000026360
Brinp3	-0.0336812296606626	1	0.100211732668792	1	ENSMUSG00000035131
Gm15443	0.0165976656780752	1	0.0368011377443213	1	ENSMUSG00000082588
Pla2g4a	-0.412071729533293	5.58874350360397e-14	-0.144893564451179	0.0386621736363261	ENSMUSG00000056220
Ptgs2os	-0.64958381564934	0.000749847850004667	-0.144494193043159	0.724905233169357	ENSMUSG00000097028
Ptgs2	-0.106009841634904	0.0161647382451207	-0.307645249146524	3.46782499740757e-14	ENSMUSG00000032487
Ptgs2os2	0.167661063664942	0.482117719755027	-0.0269035403557454	0.962766492854695	ENSMUSG00000097754
Gm15453	-0.0584614929133039	0.848915137862152	0.00785775874726652	0.989247153703135	ENSMUSG00000099875
BC003331	0.13252178773194	0.184763333507019	0.0965829749990219	0.558962205352899	ENSMUSG00000006010
Tpr	0.225988396587417	1.83919303976978e-10	-0.0582221030818012	0.325801513665607	ENSMUSG00000006005
Prg4	0.077445811778414	0.756217285297245	0.0653684111960842	1	ENSMUSG00000006014
Hmcn1	-0.278319420278658	0.171013414548762	-0.0352223876986186	1	ENSMUSG00000066842
Gm10138	0.240201893066382	0.332419102514602	0.104821372554808	0.835335336522605	ENSMUSG00000100954
Ivns1abp	0.0664878846126576	0.297740625337192	-0.125918282050066	0.065930710204566	ENSMUSG00000023150
Swt1	0.324734022265381	0.0107111068388265	0.0273637493781572	0.941269076249721	ENSMUSG00000052748
Trmt1l	0.15751239544182	0.137764315200196	-0.00502274342567445	0.985800323756329	ENSMUSG00000053286
Gm37893	0.326670170463125	0.16525681768616	-0.101242928829716	0.842409018551574	ENSMUSG00000103928
Rnf2	-0.164960419627535	0.0473201534699644	0.0910336334303198	0.504987419042998	ENSMUSG00000026484
Gm36527	0.029536298815242	1	-0.077735851538071	1	ENSMUSG00000103238
Fam129a	0.313919057682816	1.27660229322258e-16	-0.226761143083698	1.37470971481994e-07	ENSMUSG00000026483
2810414N06Rik	0.231821827004414	0.3018425112032	-0.0873345195073411	1	ENSMUSG00000100594
Edem3	0.356864198385353	3.44666950020226e-09	0.0216538995671327	0.906285124637698	ENSMUSG00000043019
1700025G04Rik	0.138572762335274	0.148126720338825	-0.0652452558534088	0.722897049524231	ENSMUSG00000032666
Tsen15	-0.185733497474077	0.18478412701637	-0.0324159786707172	0.920758615293853	ENSMUSG00000014980
Rgl1	-0.386703505471259	0.00148701734591354	-0.132241182878691	0.553205753723454	ENSMUSG00000026482
Gm7278	0.148713518158586	0.441534106008363	0.0407970213283933	1	ENSMUSG00000080950
Arpc5	0.0381366037451762	0.482117719755027	0.00845531828135567	0.947012822640665	ENSMUSG00000008475
Ncf2	0.113732098930541	1	-0.108813334820543	1	ENSMUSG00000026480
Smg7	0.0393737189384403	0.616590700653027	-0.0070706165769424	0.966883139451468	ENSMUSG00000042772
Nmnat2	-0.824477999783065	1.42963019248609e-07	0.695923906514308	2.8514548247358e-06	ENSMUSG00000042751
Lamc2	1.05008652223882	5.40211236038137e-23	0.485959952006007	7.36547115466131e-05	ENSMUSG00000026479
Lamc1	1.12278166960734	0	0.588053914275513	6.20413229711527e-103	ENSMUSG00000026478
Gm38009	0.0123934868130413	1	0.00998189393259614	1	ENSMUSG00000103818
Gm8818	0.0522533365868969	1	-0.0636040905648167	1	ENSMUSG00000079138
Dhx9	-0.0254335379768032	0.581169128426148	-0.0383084782242637	0.55256201076852	ENSMUSG00000042699
Npl	-0.0527857896389553	0.833286728546574	0.018866413834788	1	ENSMUSG00000042684
Gm6652	-0.0119636128600422	1	-0.0876516093735099	1	ENSMUSG00000099858
Rgs8	-0.0159746508436587	1	0.0419536653378175	1	ENSMUSG00000042671
Rgs16	-0.0314197851050889	0.85649637964149	0.615217674926401	3.47232553166344e-09	ENSMUSG00000026475
Rnasel	0.294786154042957	0.204216705894154	0.444631119389772	0.0900861844827932	ENSMUSG00000066800
Teddm2	-0.0565000505404034	1	0.0297791886226214	1	ENSMUSG00000045968
Glul	-0.17676504100285	0.0425791301638133	0.0547951713505233	0.751515468201099	ENSMUSG00000026473
Gm9530	-0.102157629296411	1	-0.0296469101220023	1	ENSMUSG00000096950
Ier5	-0.468570479478932	1.21557262130623e-11	-0.124513781396925	0.230630344978206	ENSMUSG00000056708
Mr1	-0.29218246376271	0.0156548149973815	0.0144017105922599	0.965340768428813	ENSMUSG00000026471
Stx6	-0.308351107950596	0.0010136811333644	-0.0730241857029883	0.705045938854227	ENSMUSG00000026470
Gm8850	-0.0479982693072008	1	-0.0949146108130157	1	ENSMUSG00000104181
BC034090	-0.29708920020878	0.0192689663565905	-0.00453015572349822	0.989247153703135	ENSMUSG00000033722
Xpr1	-0.0435316384870118	0.643004872171333	0.0561460758854972	0.696872139665733	ENSMUSG00000026469
Acbd6	-0.0554461570777853	0.717435792856383	0.0206906200233832	0.947780324543239	ENSMUSG00000033701
Qsox1	-0.345467523053334	7.41720776819252e-13	-0.293963017018751	4.11048527685461e-09	ENSMUSG00000033684
Cep350	0.0794146560653642	0.313285054843654	-0.0149474292045797	0.937337469834933	ENSMUSG00000033671
Tor1aip1	0.0494691040599616	0.508425259660811	0.0348899394261634	0.793595836215952	ENSMUSG00000026466
9430034N14Rik	0.033527420209711	0.898075524791219	-0.0261023492404141	1	ENSMUSG00000102964
Tor1aip2	0.208982702433936	2.14195787299549e-06	0.0540522676184233	0.51893826868073	ENSMUSG00000050565
Axdnd1	0.0240103078270844	0.934626414058844	0.222769525263887	1	ENSMUSG00000026601
Gm2000	-0.0479523318121692	0.85737684125224	-0.0215674052401166	0.96614562121532	ENSMUSG00000078193
Soat1	-0.139291541878626	0.00907142292207713	-0.109067862551864	0.106522012746202	ENSMUSG00000026600
Gm10031	0.152925962637503	0.546100883955398	-0.154731100131545	0.710292519680018	ENSMUSG00000101523
Abl2	0.24397020924479	2.65661811519827e-07	0.118262915435515	0.0593686148314657	ENSMUSG00000026596
Gm38043	-0.134312977722972	1	0.0732056373919544	1	ENSMUSG00000104293
Tor3a	0.463751370196026	0.000133141193859678	-0.219907548351864	0.24417995656112	ENSMUSG00000060519
Fam20b	0.187560194574027	0.00773618324506482	0.0495488096521134	0.743997139467062	ENSMUSG00000033557
Gm15428	0.0469144202691401	0.867752789707547	-0.0458386528505882	1	ENSMUSG00000046057
Ralgps2	-0.122739534065015	0.596598727696994	0.0596904020487123	0.90138724673582	ENSMUSG00000026594
Tex35	0.0327636676581461	1	0.0558738053188624	1	ENSMUSG00000026592
Rasal2	-0.0325108971290239	0.727389258068304	0.0979124491789501	0.333847829402109	ENSMUSG00000070565
2810025M15Rik	-0.349228030514637	0.00327637121966041	0.0409306618575332	0.894774931675029	ENSMUSG00000049881
Sec16b	-0.00222856528116024	0.990745823116789	-0.0984521357052769	0.674145464056041	ENSMUSG00000026589
Pappa2	0.175321454245547	0.427785222808052	-0.0611599762962673	1	ENSMUSG00000073530
Rfwd2	-0.0589799931861097	0.50668605327688	-0.0513547329023474	0.732661018421575	ENSMUSG00000040782
4930523C07Rik	0.0251280667866863	0.907151313827957	0.0888657546898129	0.772136304696178	ENSMUSG00000090394
Tnn	-1.05528846645288	5.53937274795183e-08	0.442831048174066	0.0908816037561854	ENSMUSG00000026725
Mrps14	-0.14885013306524	0.217778371734942	0.0199670123057095	0.949857020975343	ENSMUSG00000058267
Cacybp	0.0318129901810598	0.673538974978942	-0.0446506937100744	0.699258900470317	ENSMUSG00000014226
Rabgap1l	-0.0865752115948274	0.51133288658159	-0.0145398871064133	0.962766492854695	ENSMUSG00000026721
Gm36975	-0.2281737662567	1	0.052440621833215	1	ENSMUSG00000104302
Gm38329	0.142040329470508	1	0.217658927352076	1	ENSMUSG00000103632
Rc3h1	0.129659042142712	0.0456978723274563	0.0325152732063592	0.826122164371952	ENSMUSG00000040423
Serpinc1	0.0811399480889855	1	0.133187191666943	1	ENSMUSG00000026715
Zbtb37	0.206395420422512	0.0175754161481584	-0.0267178799685135	0.909709935822873	ENSMUSG00000043467
Gas5	-0.910870445745424	2.16634155264633e-111	-0.0534584906487546	0.470002404362515	ENSMUSG00000053332
Dars2	-0.161571555582723	0.361249877311504	-0.150725011900558	0.584932741857011	ENSMUSG00000026709
Cenpl	-0.285482680362484	0.0319744042263552	0.273933499087928	0.0909117935117157	ENSMUSG00000026708
Klhl20	0.150090123828486	0.203712274265243	-0.148206178757227	0.390072279731718	ENSMUSG00000026705
Prdx6	-0.0465117855382973	0.571729310882379	-0.206601563624399	0.00329319411378785	ENSMUSG00000026701
Tnfsf18	0.204358875382587	1	0.0279647150718943	1	ENSMUSG00000066755
Gm15429	0.190523862967869	0.45656495872743	0.0578412334143139	0.918436543104736	ENSMUSG00000040323
Suco	0.535267026174434	6.51204509850288e-18	-0.116788118449981	0.259874022186397	ENSMUSG00000040297
Pigc	0.192216972436318	0.277342665431317	-0.0945132189479395	0.787803829413477	ENSMUSG00000026698
Dnm3	0.174055414299736	0.477296417242505	-0.0323368306085766	0.957413309010005	ENSMUSG00000040265
2810442N19Rik	-0.0117301274471908	1	-0.0129830447336353	1	ENSMUSG00000090260
Dnm3os	-0.521011390610574	3.03097501985994e-07	-0.104499499845018	0.621907138231443	ENSMUSG00000078190
Mettl13	-0.177594717452192	0.122062633739517	-0.0585692897219884	0.80793357878845	ENSMUSG00000026694
Vamp4	-0.00777100949477321	0.963537575911845	-0.0761357816315329	0.732475719455888	ENSMUSG00000026696
Prrc2c	0.206903650691832	1.11497949178765e-10	-0.019782525289788	0.804346955318115	ENSMUSG00000040225
Gm27616	-0.086978087373208	1	-0.0704531575530955	1	ENSMUSG00000098259
Fmo1	0.0856037157560338	1	0.152204842820493	1	ENSMUSG00000040181
Mroh9	0.0523255031738424	1	0.0271427179065451	1	ENSMUSG00000071890
Prrx1	-0.400285700398678	1.95565152079299e-30	0.309736505186471	4.02005558781237e-19	ENSMUSG00000026586
Gm26523	-0.15799130069311	0.472645212368602	0.156802432268969	1	ENSMUSG00000096984
Gm37644	-0.036734565897983	0.896276597781394	0.108755519804264	1	ENSMUSG00000103195
Gorab	-0.194274749772505	0.067312554537941	0.186413812489045	0.151070213722681	ENSMUSG00000040124
Rpsa-ps1	-0.0185145381066089	0.946737221586225	-0.045022239084765	1	ENSMUSG00000102117
Kifap3	-0.0457822030622968	0.631121923471955	0.0763444592499254	0.567895477056695	ENSMUSG00000026585
Scyl3	0.059492037106739	0.732251346174715	0.227411676411402	0.188422944408728	ENSMUSG00000026584
BC055324	-0.0139161327461594	0.930832372821621	-0.0568694677064799	0.803127422641491	ENSMUSG00000041406
Mettl18	0.158699469534237	0.550009624627327	-0.067119335031828	0.906160702903999	ENSMUSG00000041396
Sele	-0.327356355670412	0.159969139789877	0.0451156633275943	0.940539075238677	ENSMUSG00000026582
Selp	-0.433946519314083	0.0479872745367949	-0.52619819905905	0.0348558309777055	ENSMUSG00000026580
F5	-0.0998508446746584	1	0.0956724331745612	1	ENSMUSG00000026579
Slc19a2	0.265771853150918	0.0619415980507034	0.0453838156597422	0.902807004608279	ENSMUSG00000040918
Ccdc181	0.339571317497265	0.0926913840291805	-0.0271805439100692	0.962419636376344	ENSMUSG00000026578
Blzf1	0.588526723398247	5.27011840460515e-08	-0.0354962784970392	0.914553358940016	ENSMUSG00000026577
Nme7	-0.175785582558475	0.278292147785329	0.18168529347765	0.420248529523743	ENSMUSG00000026575
Gm37411	-0.0303213226637049	1	-0.195249262193653	1	ENSMUSG00000103493
Atp1b1	-0.235847699888268	2.37803293719896e-05	-0.146387864973728	0.0368351722459035	ENSMUSG00000026576
Gm37754	0.543129875056196	0.000830925049438703	-0.177660341628212	1	ENSMUSG00000103383
Dpt	-0.45905762914581	0.0132432627415813	-0.00166540767555084	0.997526716429676	ENSMUSG00000026574
Sft2d2	0.384822290226155	2.49944240830912e-05	0.0283769003467186	0.915814811531363	ENSMUSG00000040848
Tiprl	-0.144143421928244	0.135305298349816	0.0634703694314691	0.726453883728629	ENSMUSG00000040843
Gm38190	0.0515445335210475	0.873481298392092	0.00193549176506372	0.997526716429676	ENSMUSG00000102302
Gpr161	0.00278878397663319	0.986994898152985	-0.0219487777258186	0.94216757286026	ENSMUSG00000040836
Dcaf6	0.103911889279498	0.393398835401067	0.08254538676035	0.695715408289065	ENSMUSG00000026571
Mpc2	-0.185710573494487	0.254349260470146	-0.0831962928516861	0.789073150880733	ENSMUSG00000026568
Gm37860	0.00945797286204681	1	-0.0463584008046702	1	ENSMUSG00000103763
Mpzl1	-0.062494118318206	0.548169145468097	-0.0745720799150567	0.640664900951483	ENSMUSG00000026566
Gm37559	-0.0799385700156654	1	0.0296993788322938	1	ENSMUSG00000103098
Creg1	0.457914503156515	0.00928021373490177	0.323156033770053	0.185631671327304	ENSMUSG00000040713
Pou2f1	0.39139778058243	4.67857310844267e-06	-0.0703239066029931	0.720174330395085	ENSMUSG00000026565
Dusp27	-0.134280814112634	0.490847805187837	-0.13308557550103	1	ENSMUSG00000026564
Ildr2	0.504980792354534	0.00307614716695027	0.259962866064844	0.331786002290513	ENSMUSG00000040612
Gm15853	-0.184417042184538	1	-0.027430006480386	1	ENSMUSG00000103400
Tada1	-0.274536734498831	0.0607101542265766	0.0574783142049029	0.86598994509932	ENSMUSG00000026563
Pogk	-0.230464331161261	0.00848914890658889	-0.181114672505476	0.0993809548860814	ENSMUSG00000040596
Gm16418	-0.0743859284315482	1	0.101446035123331	1	ENSMUSG00000084093
Gm6286	0.0624742393947439	1	-0.0546225669157299	1	ENSMUSG00000086925
Fam78b	-0.134281062654683	1	-0.113764922661283	1	ENSMUSG00000060568
Uck2	0.133886803052875	0.0176390230882415	-0.110909506512953	0.131979003004426	ENSMUSG00000026558
Gm2453	-0.101134388152889	1	-0.104269615927769	1	ENSMUSG00000102909
Tmco1	-0.149821798814958	0.0758923941762377	0.00689523950120117	0.974959467096917	ENSMUSG00000052428
Aldh9a1	0.0305012130786928	0.808383911302023	-0.125409133249055	0.349265049488284	ENSMUSG00000026687
Mgst3	0.232601247991432	0.0472499496622099	0.586447578332669	3.79788028389304e-08	ENSMUSG00000026688
Pbx1	-0.772748846948949	7.14318028319196e-66	-0.0284380603807637	0.794568730450154	ENSMUSG00000052534
Gm37524	-0.233118468613094	1	-0.0177018612502906	1	ENSMUSG00000103780
Gm38381	-0.174966900130182	1	0.0322081750649387	1	ENSMUSG00000102594
Nuf2	-0.227475201685522	0.00126064152121076	0.0717032128622164	0.588938047030214	ENSMUSG00000026683
Rgs5	-0.185757928264757	0.280954006037375	0.1161143301199	1	ENSMUSG00000026678
Rgs4	-0.77307982411605	4.06774314295213e-07	0.0646361231811643	0.871347509361561	ENSMUSG00000038530
Hsd17b7	0.192935908958952	0.0043116150914087	0.282622751771773	5.52002714828903e-05	ENSMUSG00000026675
3110045C21Rik	0.0217095632810602	0.949190256768809	0.183992371276733	0.661493370223943	ENSMUSG00000097503
Ddr2	0.356468378884418	2.58495900561249e-41	0.201181546126194	1.21570946585782e-12	ENSMUSG00000026674
Uap1	0.115724875262897	0.109333891651612	0.17268452180843	0.025512183601259	ENSMUSG00000026670
Uhmk1	1.23378700294857	8.83928123258221e-157	0.0759843822887542	0.420304639413697	ENSMUSG00000026667
Sh2d1b1	-0.587235288518593	9.28953731035968e-07	0.253227487186008	0.086011623829604	ENSMUSG00000102418
Gm7694	0.0101759118459679	0.973551776220997	0.105364838393989	1	ENSMUSG00000102752
Nos1ap	-0.0678654555295999	0.771419379196471	0.0177539384286802	1	ENSMUSG00000038473
Gm7299	-0.0331490519448047	1	-0.0637831575388917	1	ENSMUSG00000102193
Olfml2b	0.39367329076422	3.22624954843705e-06	-0.27915721270343	0.00793374555513644	ENSMUSG00000038463
Atf6	0.408812960200071	5.4804951628334e-13	-0.0685819743781221	0.553746739280824	ENSMUSG00000026663
Dusp12	-0.112248975194157	0.526536815168894	-0.107046961381673	0.714584727595754	ENSMUSG00000026659
Gm26620	0.0250296050266241	0.914295106335933	-0.204427703594079	1	ENSMUSG00000096968
Gm2962	-0.108857327344372	0.614088739718268	-0.117946784333597	1	ENSMUSG00000089838
Fcgr3	-0.0142393519810425	1	0.0066122930477742	1	ENSMUSG00000059498
Cfap126	-0.133773669533976	0.559167629676741	0.0600351911750817	1	ENSMUSG00000026649
Sdhc	-0.179291798234534	0.0356571100297376	0.0935497614580823	0.515062716365935	ENSMUSG00000058076
Mpz	0.0741316118138248	1	0.00114887717079048	1	ENSMUSG00000056569
Tomm40l	-0.238930398519797	0.0752385787375783	-0.0693533520641635	0.80229591099422	ENSMUSG00000005674
Apoa2	-0.361308426370686	0.0469234835872517	-0.0712953309616677	1	ENSMUSG00000005681
Fcer1g	0.0557208550569358	1	-0.105403986969681	1	ENSMUSG00000058715
Ndufs2	0.0118085617213064	0.892777079273467	-0.0112080276580197	0.94288350782527	ENSMUSG00000013593
Adamts4	-0.360890863739862	0.0223332603914381	-0.00921756719786109	0.982514237799043	ENSMUSG00000006403
B4galt3	0.0851201560831889	0.579786191446198	-0.196958907753409	0.272752862763268	ENSMUSG00000052423
Ppox	-0.118645791381566	0.457904124734158	0.0641738453129173	0.835171508466144	ENSMUSG00000062729
Usp21	-0.114189002136566	0.337714382299141	-0.0519190687822714	0.8260311312754	ENSMUSG00000053483
Ufc1	-0.118902486853546	0.225489143453392	0.133257944557922	0.30091952927159	ENSMUSG00000062963
Rpl27-ps1	0.0249499587370405	1	0.0837917067952297	1	ENSMUSG00000079137
Gm20045	0.0404940161696043	0.901194644721403	0.0727777170702648	0.898909220229837	ENSMUSG00000103983
Dedd	0.127095525496368	0.251521866593951	0.0868800137000782	0.649024455002634	ENSMUSG00000013973
Nit1	-0.0469069325669509	0.807281098769611	0.0366638108246759	0.918475243572124	ENSMUSG00000013997
Pfdn2	0.195580405779951	0.0174093875654947	0.0323676895402484	0.874423769788778	ENSMUSG00000006412
Gm37154	0.00870760821020834	0.978443339381158	0.31103271005446	0.30091952927159	ENSMUSG00000102929
Pvrl4	0.0631876137786208	1	-0.0430705985042085	1	ENSMUSG00000006411
Usf1	0.00201916228620615	0.990436683130389	0.051652248162447	0.830153158155586	ENSMUSG00000026641
Tstd1	0.171387879574065	0.331950183382117	0.0733450099532147	1	ENSMUSG00000103711
F11r	0.807182976891821	1.95689116594383e-28	-0.177331017725765	0.116221236142726	ENSMUSG00000038235
B930036N10Rik	0.069931199977127	1	-0.109817588762605	1	ENSMUSG00000091993
Alyref2	-0.00165178649701712	0.99611364459514	0.00603397490069068	0.990717537080325	ENSMUSG00000060244
Ly9	0.198446509493034	0.395356965871221	0.166021074221254	1	ENSMUSG00000004707
Tma7-ps	-0.109332357304503	0.69203048482515	0.202778388841364	0.59926089218993	ENSMUSG00000059058
Vangl2	-0.269506653679877	0.165270105102454	0.4739817857263	0.0167392212987834	ENSMUSG00000026556
Ncstn	0.460561043297575	2.55624787319353e-22	0.0140798956583901	0.923793694512472	ENSMUSG00000003458
Copa	-0.0183735294330476	0.665138910630114	-0.0938321846895496	0.0082004502382857	ENSMUSG00000026553
Pex19	-0.142958741836629	0.0821822082876449	-0.014483302730825	0.947941334427561	ENSMUSG00000003464
Gm10171	-0.0255677407550411	1	-0.1751090241219	1	ENSMUSG00000089803
Dcaf8	-0.0801703915152127	0.238703588823931	0.112756132560992	0.150694164545213	ENSMUSG00000026554
Pea15a	0.0654280791071955	0.173975877312916	-0.0205920199723847	0.842333338979298	ENSMUSG00000013698
Casq1	-0.0853766630957724	1	-0.00694569665210091	1	ENSMUSG00000007122
Igsf8	-0.0962744900182172	0.460297799972461	0.278076096153315	0.0140771600085424	ENSMUSG00000038034
Pigm	0.53686313489386	2.91646934670101e-10	0.0259464551063421	0.920752876161326	ENSMUSG00000050229
Gm37145	0.421271078265798	0.0537844740906329	0.525554624262009	0.032413478420924	ENSMUSG00000102278
Igsf9	0.198006333492449	0.435529441522642	-0.340820550482084	0.262067459914392	ENSMUSG00000037995
Tagln2	-0.0262057030061646	0.573272207979024	0.0299773147258134	0.681618830566241	ENSMUSG00000026547
Gm37125	0.069637014194803	1	0.011174651968106	1	ENSMUSG00000104351
Cfap45	0.162624927601992	0.435844540548694	0.0718384239780952	1	ENSMUSG00000026546
4933439K11Rik	-0.0382556138189565	1	0.0291156271397732	1	ENSMUSG00000085184
Dusp23	-0.127299860401332	0.649225844662902	-0.0787683755402457	0.886200550450813	ENSMUSG00000026544
Aim2	0.0623060824856936	1	-0.0139140338896076	1	ENSMUSG00000037860
Pyhin1	0.326039779459114	0.0474960023928018	-0.0923956807702209	1	ENSMUSG00000043263
Ifi204	0.463918596523787	0.00467384460508543	0.270580127976378	0.282191206785629	ENSMUSG00000073489
Gm16340	-0.0422939403627333	1	-0.0683020988037769	1	ENSMUSG00000090222
Mndal	-0.114179327138867	0.656601632585483	-0.165268984192109	1	ENSMUSG00000090272
Mnda	-0.0436712226973209	0.835535022348891	0.131921045818398	0.632686550592343	ENSMUSG00000026536
Ifi203	-0.0271990664605487	0.933257614824476	-0.0628885674371183	0.908199473783791	ENSMUSG00000039997
Ifi205	-0.0338901124862298	1	0.195145236040624	1	ENSMUSG00000054203
Spta1	0.0916744230280883	0.729231488617418	-0.116747140967911	0.786437307124991	ENSMUSG00000026532
Grem2	-1.00869826824608	3.96027489039913e-10	-0.0349497872110567	0.941101230742032	ENSMUSG00000050069
Rgs7	-0.0320783754343606	1	0.0253086561729573	1	ENSMUSG00000026527
Fh1	0.106276663995201	0.291472895341198	-0.0236677919392292	0.918475243572124	ENSMUSG00000026526
Opn3	-0.0426107079081941	0.896524916051517	0.0705932645375493	0.90138724673582	ENSMUSG00000026525
Chml	0.310340442399789	0.0131322100539419	-0.129822179761569	0.573244446582754	ENSMUSG00000078185
Exo1	0.0114331282103713	0.941105474289153	-0.245782506271804	0.0296657023331628	ENSMUSG00000039748
Rbm8a2	-0.0269880233541639	1	0.0301779945825807	1	ENSMUSG00000078184
Cep170	-0.0240713869893806	0.716947838493902	0.0164877974325212	0.898844489673428	ENSMUSG00000057335
3110062G12Rik	-0.13498053752792	1	0.0357425438919431	1	ENSMUSG00000103634
Gm38104	0.0488160416427337	0.862387519349795	0.0426024929121563	1	ENSMUSG00000104154
Sdccag8	-0.124162742539771	0.451139003144054	0.0313342274946824	0.932595850009298	ENSMUSG00000026504
Gm38158	0.179458527100732	0.369378009294628	-0.235565539138254	1	ENSMUSG00000103367
Akt3	0.376963930811264	7.59206419461216e-08	-0.0732442423745359	0.624169726009965	ENSMUSG00000019699
Gm37960	0.00508650627853333	1	0.0313707958736841	1	ENSMUSG00000104391
Gm26801	0.0156245803510816	1	0.0301877600730133	1	ENSMUSG00000097892
Zbtb18	0.93112667643962	5.37495821764429e-38	-0.404643954599495	8.26381289052922e-06	ENSMUSG00000063659
1700016C15Rik	0.154365185939658	1	0.238241272926883	1	ENSMUSG00000015962
Adss	-0.0439054833036371	0.494294081325163	0.040753418688542	0.699841013964691	ENSMUSG00000015961
Gm8010	-0.104605875092634	1	0.0503839080963327	1	ENSMUSG00000102493
Desi2	-0.0940412256383527	0.152118097000819	-0.0336136718244788	0.801054017589754	ENSMUSG00000026502
Gm37486	-0.0444403291350456	1	-0.0551922273894744	1	ENSMUSG00000104126
B230369F24Rik	0.144297551906338	0.531109818525329	-0.0579364371296776	1	ENSMUSG00000086350
Cox20	-0.263935903454129	0.18336348149445	0.174564025388189	0.600794961636177	ENSMUSG00000026500
Gm16586	0.119954227131187	0.374050607377582	0.143650838995729	0.455443933475464	ENSMUSG00000089788
Gm28062	-0.086481148006893	1	-0.0162576620729547	1	ENSMUSG00000100725
Hnrnpu	0.0468351046211685	0.512212150049469	-0.018090081745361	0.907456702436008	ENSMUSG00000039630
Gm38300	-0.0866524066764977	0.726691579673	-0.134710969542075	1	ENSMUSG00000104279
Efcab2	-0.145093390234802	0.591873657196607	-0.103497858196649	0.835335336522605	ENSMUSG00000026495
Kif26b	-1.0858499343838	8.87675502782771e-16	-0.323462002899245	0.0658789271502918	ENSMUSG00000026494
Smyd3	-0.241203378455618	0.175040607997864	-0.0497044936389482	0.907340949663697	ENSMUSG00000055067
Gm5561	0.0356303876608928	0.912951126704003	0.201166418577475	0.618389601161584	ENSMUSG00000096474
Tfb2m	-0.0640725299959577	0.720470405820476	-0.0754641109106129	0.794755569518996	ENSMUSG00000026492
Cnst	-0.0565998759081605	0.646202002257339	-0.25051062650382	0.0196605772406859	ENSMUSG00000038949
Sccpdh	-0.0926177430877593	0.495346632965764	-0.00705603576872585	0.981671257068937	ENSMUSG00000038936
Ahctf1	0.0245036693300781	0.682823193560278	-0.0755330910030676	0.232694598051633	ENSMUSG00000026491
Gm37070	-0.00505461858121501	1	-0.139954949409253	1	ENSMUSG00000104418
Cdc42bpa	-0.0152575072103484	0.806800944169717	-0.16671227539184	0.000150764057122062	ENSMUSG00000026490
Adck3	-0.350223840520868	0.065550383364775	0.0805220229464569	1	ENSMUSG00000026489
Psen2	-0.0159028110633269	0.960594080597559	0.14812666794894	0.71211110221019	ENSMUSG00000010609
Gm5069	-0.123519945692615	0.547448765287295	-0.029034300473031	1	ENSMUSG00000055676
Itpkb	-0.58976884207531	6.01775711803812e-08	-0.0140288232271778	0.964905310950781	ENSMUSG00000038855
Parp1	-0.104022498106632	0.0415440767295454	-0.0518910729141833	0.560073044684685	ENSMUSG00000026496
Lin9	-0.00778981650110004	0.963362603072226	0.044246440307213	0.866545982926162	ENSMUSG00000058729
Acbd3	0.125722116735795	0.0683537247900176	-0.0184834773304297	0.918311585382685	ENSMUSG00000026499
H3f3a	0.0505001164229285	0.414396722652986	0.142407313999469	0.0144754329456894	ENSMUSG00000060743
H3f3aos	-0.148585415158194	0.499687596936454	-0.0117726070842866	1	ENSMUSG00000073485
Sde2	-0.135322256047153	0.134798049378083	0.0747430274535544	0.639282990066317	ENSMUSG00000038806
Pycr2	-0.116521102566998	0.297088493722364	-0.0648655552208045	0.74840840044443	ENSMUSG00000026520
Tmem63a	-0.0433466364148371	0.654777638671907	-0.0779779516357645	0.55542252942981	ENSMUSG00000026519
Ephx1	0.431451221044647	2.99546517915782e-05	0.304176449107281	0.0155379539282537	ENSMUSG00000038776
Nvl	-0.0881583146358973	0.184666088356439	0.0454550548070501	0.711967436234127	ENSMUSG00000026516
Cnih4	0.151275013956452	0.0566782944473307	-0.0351211132415544	0.849677690861132	ENSMUSG00000062169
Wdr26	0.156405249406091	0.000309673835935522	0.211919804339209	1.88745421153446e-06	ENSMUSG00000038733
A430110L20Rik	-0.0952181732675409	0.676396218817554	0.0643336815474977	1	ENSMUSG00000054135
Rpl35a-ps2	0.0571117700777004	1	0.0499563392161945	1	ENSMUSG00000081214
Gm23690	-0.0171118079200867	1	-0.0413618596407054	1	ENSMUSG00000064970
Lbr	0.189607330314757	0.00131740462830001	-0.0332093881620439	0.816540847488097	ENSMUSG00000004880
Enah	0.232712073610718	1.27528068843199e-06	0.0113638537352966	0.938877549916216	ENSMUSG00000022995
Gm38359	-0.00884184117236105	1	0.0725421688159351	1	ENSMUSG00000103317
Srp9	-0.216858182747427	0.0128445568914634	-0.0290263882432026	0.898095501829016	ENSMUSG00000026511
Degs1	0.205868506836856	7.06720364855163e-06	-0.014329853044059	0.913730385702258	ENSMUSG00000038633
Fbxo28	0.0639778834766695	0.550613301768157	0.0613356916713532	0.734266686204305	ENSMUSG00000047539
Trp53bp2	0.054898375404262	0.70732948880832	0.0411542893039312	0.880037918349406	ENSMUSG00000026510
Capn2	0.227498583962544	2.55798058514181e-14	-0.0691661109402153	0.107110301296942	ENSMUSG00000026509
Gm37885	-0.0147307353754271	1	0.0290004412662724	1	ENSMUSG00000102234
Susd4	-0.00590994829814624	0.98465869911813	0.143624267999674	1	ENSMUSG00000038576
Tlr5	0.44319458791194	0.0295077158589396	0.441863011113011	0.0789157015360257	ENSMUSG00000079164
Gm38079	0.111320661558873	1	-0.00660799823210139	1	ENSMUSG00000104367
Disp1	0.251966916717584	0.000823385073546153	0.456387378358765	4.55583186609215e-10	ENSMUSG00000030768
BC085271	0.0542098647844379	0.822457932177609	-0.00791435370801457	1	ENSMUSG00000102478
Brox	0.0756006558407661	0.39271257595795	0.191719857085098	0.0247615151210005	ENSMUSG00000046836
Aida	-0.0205293726485809	0.792129353482492	0.0829878608445049	0.302683786078284	ENSMUSG00000042901
Mia3	0.457259612137393	1.22765137461877e-17	-0.0488391186805289	0.69799884627984	ENSMUSG00000056050
Taf1a	-0.00293953628180405	0.988972787317591	0.0432380538402258	0.901048290144428	ENSMUSG00000072258
Gm37986	-0.10664665207388	1	0.00822907685856622	1	ENSMUSG00000104212
Hhipl2	0.138115998009636	1	0.0553423597193482	1	ENSMUSG00000053461
Dusp10	-0.412519939690142	3.61944772263938e-07	0.352874507272237	2.17261290412966e-05	ENSMUSG00000039384
1700056E22Rik	-0.0541503467070408	0.843189957445714	0.021706283742446	1	ENSMUSG00000044854
Gm37800	-0.0330096233348204	1	0.0329949968653194	1	ENSMUSG00000103308
Hlx	-0.38023822161746	0.0485365323052799	0.159625422791406	0.651263060381798	ENSMUSG00000039377
Gm34342	-0.145497744626381	1	-0.019316293576027	1	ENSMUSG00000102158
Marc2	-0.0316600798132653	0.85819876868929	0.193158613821372	0.244641135773168	ENSMUSG00000073481
C130074G19Rik	0.130320762298017	1	-0.0532783402701164	1	ENSMUSG00000039349
Mark1	-0.333671495084603	0.0474080479789352	-0.00909832342570366	0.983422785280491	ENSMUSG00000026620
Rab3gap2	0.325127957641885	3.05344413470235e-12	-0.0764187316017061	0.343033278814014	ENSMUSG00000039318
Iars2	0.207702105549835	0.00112311781126005	0.019866094918529	0.911420265987389	ENSMUSG00000026618
Gm37785	0.0666374160444503	1	0.0131450592390958	1	ENSMUSG00000102526
Bpnt1	-0.0290011040736082	0.818971194750513	-0.00866956087504295	0.970988942603838	ENSMUSG00000026617
4930532G15Rik	0.00920236616824827	1	-0.012006342121022	1	ENSMUSG00000097261
Eprs	0.286615765812939	9.20973161035544e-23	-0.207910835541445	4.79317209301227e-11	ENSMUSG00000026615
Lyplal1	-0.144250556953592	0.528319715463243	-0.0896151462053231	0.835335336522605	ENSMUSG00000039246
Gm38268	-0.00722982128286905	1	-0.0211782887959766	1	ENSMUSG00000103056
Tgfb2	0.181931911762581	0.132777916898723	-0.0783361198760725	0.751131073166011	ENSMUSG00000039239
Gm29491	-0.0158265444412602	1	-0.0800000780933255	1	ENSMUSG00000100393
Rrp15	-0.0581775620428427	0.586092921909637	-0.0286110488177776	0.898909220229837	ENSMUSG00000001305
A430105J06Rik	-0.0831843184934576	0.695742834098809	0.0411283773763685	1	ENSMUSG00000097784
Gm3809	0.11311004488021	1	0.0297685536794584	1	ENSMUSG00000097935
Spata17	-0.133179801589522	1	-0.0133195612120328	1	ENSMUSG00000026611
Gpatch2	0.247985650343207	0.0765019821229415	0.0906987462729805	0.745781409139784	ENSMUSG00000039210
Gm21710	0.553550734617492	0.0078798822102434	0.076263054500879	0.891745276145798	ENSMUSG00000104394
Esrrg	0.132787715322102	1	-0.190366602838442	1	ENSMUSG00000026610
Kctd3	-0.0257372957517559	0.84588916827311	-0.0285028400620356	0.90645063804257	ENSMUSG00000026608
Kcnk2	-0.0614356546219492	0.760762829765228	-0.239835834482565	0.253276627095454	ENSMUSG00000037624
2900042K21Rik	-0.0124082498264558	1	0.00849302646975103	1	ENSMUSG00000103669
Gm3837	-0.041317106912599	0.890953712911015	-0.0479145097522428	1	ENSMUSG00000102824
Cenpf	-0.202456583468885	2.56770631204472e-05	0.0448779464365736	0.645354845445397	ENSMUSG00000026605
Ptpn14	0.139984762295854	0.0159194476161726	-0.0467846922056537	0.694871860197646	ENSMUSG00000026604
Smyd2	-0.0110093967803437	0.924212343180257	0.00527545639856277	0.979157619950898	ENSMUSG00000026603
Gm38245	-0.118226961684255	0.592727016692402	0.139668699444504	1	ENSMUSG00000103467
Rps6kc1	0.178865984128725	0.0511362282400097	0.992622818038462	9.95844982579168e-42	ENSMUSG00000089872
Angel2	-0.00866153335435706	0.946248741531101	0.118517390801545	0.331786002290513	ENSMUSG00000026634
Vash2	0.291474993935459	0.000377742489362576	-0.0475575057292205	0.812194313922427	ENSMUSG00000037568
Mfsd7b	0.0861706799409002	0.473281220592626	0.142345124314743	0.330992731127046	ENSMUSG00000066595
Tatdn3	-0.0340600845771583	0.912347215637936	0.0998897897220275	0.834060602146985	ENSMUSG00000026632
Nsl1	-0.12522049485571	0.406091368766865	0.0518386052004663	0.86598994509932	ENSMUSG00000062510
Batf3	-0.232647767908547	0.249774942367589	0.147023296010644	1	ENSMUSG00000026630
Atf3	1.08789109988822	3.88473080987104e-15	-0.388831568020503	0.0599349940560123	ENSMUSG00000026628
D730003I15Rik	-0.199421671183499	0.441642894762059	-0.00405714979228161	0.993712141855288	ENSMUSG00000073478
Gm37074	0.174602102875664	0.413749454300415	-0.121049528572177	1	ENSMUSG00000103685
Gm37168	-0.0223410364696111	0.941402931704563	0.0105016369494511	1	ENSMUSG00000103174
Nenf	-0.268797467554696	0.0422334127624755	0.0886894623274784	0.732848296271883	ENSMUSG00000037499
Tmem206	0.718529408932522	1.13074013836848e-08	-0.210504678507489	0.334114290830398	ENSMUSG00000026627
Ppp2r5a	0.290748422823146	2.58347181532774e-05	-0.0399902681893327	0.814259306244627	ENSMUSG00000026626
9430037O13Rik	-0.020485981827991	1	-0.0800229643364752	1	ENSMUSG00000102246
Dtl	0.116346621286255	0.171207149395417	0.0414271085541455	0.818209880353341	ENSMUSG00000037474
Ints7	-0.0515340901302219	0.531963678102357	0.018545771073378	0.916593810328241	ENSMUSG00000037461
Gm37349	0.0342993911107788	1	0.0486245327252968	1	ENSMUSG00000102970
Lpgat1	0.39337072004607	1.14202025704125e-18	-0.0541290384561899	0.560753591543771	ENSMUSG00000026623
Gm38037	-0.208727449911847	0.341173778961928	0.0121697577894068	1	ENSMUSG00000102840
Nek2	0.227344446902167	0.00166535685469174	0.00413117191883919	0.984064379206663	ENSMUSG00000026622
1700034H15Rik	0.0068719005876986	1	0.0291972291484769	1	ENSMUSG00000055833
Slc30a1	0.20218994936666	0.166161812442128	0.194389196832755	0.349194249493025	ENSMUSG00000037434
Traf5	-0.485342294320009	0.00167551735036123	-0.05211623722055	0.90138724673582	ENSMUSG00000026637
Gm3934	0.00673991651073357	0.983469953265656	0.0876016002328062	0.862640355380713	ENSMUSG00000103653
Rcor3	-0.103965926654842	0.410990186236475	0.0395883928789693	0.886591930231414	ENSMUSG00000037395
Gm10516	0.228801240251844	0.351812870475123	-0.273790148538954	0.423829661675471	ENSMUSG00000097316
Kcnh1	-0.0794404854630001	1	0.0918217850193137	1	ENSMUSG00000058248
Hhat	-0.0957140519372562	0.671548700802247	0.0752364620228136	0.860393177092656	ENSMUSG00000037375
Sertad4	0.00543031330207425	0.963832482649645	-0.248902442019022	0.00181928822106644	ENSMUSG00000016262
Gm15867	0.000713167585594914	0.998074520344113	0.130913749595579	0.774122505886274	ENSMUSG00000089812
Diexf	-0.185996547944746	0.114898600245412	-0.056350543979793	0.828932204106194	ENSMUSG00000016181
A130010J15Rik	-0.0362328950691935	0.898787873344095	-0.279479036038425	0.300836816188707	ENSMUSG00000079144
Lamb3	1.18585657336756	2.27496420212187e-10	0.135695660022605	0.748920140880788	ENSMUSG00000026639
G0s2	-0.00637491889704811	0.98086399748094	-0.207486256261788	1	ENSMUSG00000009633
Plxna2	0.679879294254186	1.39365894512693e-17	0.769166907331351	3.33947995783162e-21	ENSMUSG00000026640
Cd34	1.16642535613567	4.76946572540388e-190	0.525781980182484	5.87385454212532e-35	ENSMUSG00000016494
Gm16897	0.0883233485775285	1	0.0317994748032242	1	ENSMUSG00000097325
A330023F24Rik	0.0879451225475118	1	0.0933196695005752	1	ENSMUSG00000096929
Cd46	0.218136545690652	0.392503992376111	-0.178514501142502	0.679085601669915	ENSMUSG00000016493
Gm37132	-0.0362724407570218	1	-0.0156220127891148	1	ENSMUSG00000103443
Cr1l	0.49224463517288	2.42021516340844e-09	0.0221069073360693	0.932444077418063	ENSMUSG00000016481
Cr2	-0.0895632294225255	1	-0.0160562223997069	1	ENSMUSG00000026616
Fam171a1	-0.0403707371278038	0.694455341367327	0.0751131573488645	0.583816627798059	ENSMUSG00000050530
Nmt2	0.281750775873369	5.39079346845457e-07	0.135223413213498	0.0767235389960558	ENSMUSG00000026643
Rpp38	-0.00992727751302711	0.96670980055832	-0.0143659120106041	0.972464615404661	ENSMUSG00000049950
Dclre1c	0.180858108683283	0.374415142671959	0.329129307677003	0.150340926572138	ENSMUSG00000026648
Suv39h2	0.0211797544185456	0.903140321234502	-0.00395339507979022	0.989247153703135	ENSMUSG00000026646
Hspa14	0.172366015284602	0.0103293105802101	-0.0183770024746759	0.920742114672997	ENSMUSG00000051396
Cdnf	-0.100737709080636	0.691077184201265	0.121628622159045	1	ENSMUSG00000039496
Fam107b	-0.140402886085009	0.0428367443897359	-0.0277327833077162	0.866778337646597	ENSMUSG00000026655
Frmd4a	0.148771478334535	0.00147205192169788	-0.0981672095911244	0.121291140998213	ENSMUSG00000026657
Gm13187	0.0132749654282797	1	-0.0638262613954033	1	ENSMUSG00000087355
Gm36988	0.014460416885213	1	0.00546359390196937	1	ENSMUSG00000102494
Prpf18	0.135656545961985	0.139347982673269	0.0404735647493264	0.840369992707801	ENSMUSG00000039449
Bend7	0.0411351370278552	1	0.0965254206286515	1	ENSMUSG00000048186
Sephs1	-0.203383253998267	0.00318095691586724	-0.0118344692229773	0.954493499288234	ENSMUSG00000026662
Phyh	-0.267556569460678	0.19455303596427	0.191317836142151	0.56792451277895	ENSMUSG00000026664
Gm13192	-0.0556518039270999	0.859174732698117	0.266058542609369	0.450392157603626	ENSMUSG00000069188
Mcm10	-0.0106235495726414	0.932415751645433	-0.122446521514474	0.294502111881311	ENSMUSG00000026669
Optn	0.582818324514608	2.97956001486652e-07	0.222856125932705	0.21184429522643	ENSMUSG00000026672
Ccdc3	0.378241236244932	0.0402281769272036	-0.0889241869008566	1	ENSMUSG00000026676
Camk1d	0.273500171803096	7.63210657605557e-05	0.0441561848771918	0.787803829413477	ENSMUSG00000039145
Cdc123	0.0636068765221325	0.392410823359682	0.0517167121520254	0.683869019989528	ENSMUSG00000039128
Nudt5	0.548937561657198	2.28074710617137e-15	-0.097596494745714	0.47277116491753	ENSMUSG00000025817
Gm13199	-0.107217228531761	1	-0.127124498061043	1	ENSMUSG00000056718
Sec61a2	0.11233032085008	0.187260803894457	0.00540360652788892	0.979658334428436	ENSMUSG00000025816
Dhtkd1	-0.0791148667071864	0.797556736720711	-0.207046230275895	0.6055728417527	ENSMUSG00000025815
Upf2	-0.129526234722056	0.130269018811636	0.0564150137702399	0.730743802915029	ENSMUSG00000043241
Proser2	0.0906436879731456	0.734793322831573	0.00642683939986566	1	ENSMUSG00000045319
Echdc3	0.196825747998607	0.404478005606529	0.238461203627665	0.470002404362515	ENSMUSG00000039063
Usp6nl	0.178799043279828	0.057605829196902	0.0381472638377868	0.866778337646597	ENSMUSG00000039046
Celf2	-0.197130660164987	0.000565310385363122	-0.258076032001547	1.14753985134963e-05	ENSMUSG00000002107
Gm13217	0.0555436283291009	1	-0.0779451898936255	1	ENSMUSG00000082953
Gata3	-0.247697163532776	0.28730253950626	-0.434525960730111	0.0853122387502396	ENSMUSG00000015619
Taf3	-0.121396655105823	0.36929069052637	-0.0936241690639704	0.685643139244888	ENSMUSG00000025782
Atp5c1	-0.0825454088788172	0.084580056890774	0.0231649139173153	0.824100905566218	ENSMUSG00000025781
Kin	-0.173798501630491	0.210937424757189	0.184781987804857	0.324538089952748	ENSMUSG00000037262
Itih2	-1.26612160263208	4.94552164920085e-33	-0.47381769697171	1.65875648242643e-05	ENSMUSG00000037254
Itih5	-0.350928457413078	0.1158386812247	-0.248015615960666	0.490584730660085	ENSMUSG00000025780
Sfmbt2	-0.478621210990325	0.00924581733767159	-0.209714814166347	0.504699464326695	ENSMUSG00000061186
Gm13292	0.113559703438466	0.571653067157448	-0.102338644358932	1	ENSMUSG00000082424
Pfkfb3	-0.644749306680457	2.71683172768647e-11	-0.174894426447857	0.226547637463982	ENSMUSG00000026773
Rbm17	-0.0656961707780826	0.373680742673754	-0.0476794186134133	0.710015374564118	ENSMUSG00000037197
Il15ra	0.283219954958758	0.20781863064662	-0.250133543759725	0.459790719013087	ENSMUSG00000023206
Fbxo18	-0.00693191228570344	0.951660614455485	-0.00989665767917351	0.962766492854695	ENSMUSG00000058594
Ankrd16	-0.00242619028074438	0.989773797603831	0.0761333380205642	0.759544163056845	ENSMUSG00000047909
Itga8	-0.96917048595623	1.09104910833482e-10	-0.477799763982071	0.00780302501520329	ENSMUSG00000026768
Fam188a	-0.111191147711375	0.311763952299894	0.0350568846384048	0.887756772785898	ENSMUSG00000026767
Gm37289	-0.0772458639988017	1	0.0329784205526342	1	ENSMUSG00000102630
Gm37255	-0.085081269034399	1	0.0506859922505971	1	ENSMUSG00000104449
Gm38014	-0.0716972838609927	1	0.0216532963241439	1	ENSMUSG00000104406
Gm37565	0.155510723820537	0.567155735161768	-0.454596459782993	0.0914781196096275	ENSMUSG00000104045
Pter	-0.281681447607066	0.00394148516055907	-0.0523156288845383	0.818113053401258	ENSMUSG00000026730
C1ql3	-0.205884994010747	0.291905242586221	-0.281794991036359	0.236815203789251	ENSMUSG00000049630
Gm37824	-0.109838708576959	1	-0.0122619740490271	1	ENSMUSG00000104459
Gm37811	0.0769355492242342	1	0.0710742688422814	1	ENSMUSG00000102900
Rsu1	-0.131603056594107	0.0140940652042359	-0.156234110528247	0.00776017027298461	ENSMUSG00000026727
Gm37780	-0.0217710544429672	0.94541493980923	-0.0354499370130115	1	ENSMUSG00000102691
Gm37160	-0.010272618163868	1	0.0279892833112351	1	ENSMUSG00000103232
Gm13270	-0.0399857388267205	0.864897803100108	0.178989971383982	1	ENSMUSG00000086358
Cubn	0.444442090417435	0.00114633871832195	-0.0893061955078598	0.785852346878585	ENSMUSG00000026726
Trdmt1	-0.186453829558605	0.305928266446653	0.107911801091732	0.741631296962485	ENSMUSG00000026723
Vim	-0.207987397889203	9.61910478108708e-11	-0.12553725934764	0.000621490743210902	ENSMUSG00000026728
St8sia6	-0.214071307104905	0.223152333903387	0.156161093501573	1	ENSMUSG00000003418
Hacd1	0.020839650488707	0.905527650170179	-0.117200106033249	0.579852069548105	ENSMUSG00000063275
D930036K23Rik	0.217850143493501	0.363624904430044	-0.0411688737714175	0.942250584531726	ENSMUSG00000102553
Gm37894	0.0242931653153417	1	-0.0140339853960785	1	ENSMUSG00000103926
Stamos	0.0832235262779686	0.733597507302817	-0.222402903362301	1	ENSMUSG00000086657
Stam	0.0309004311001015	0.734555232238239	0.0310130112383188	0.84482004300004	ENSMUSG00000026718
Gm37499	-0.109996931146052	0.704151379863118	-0.0432617723140257	0.94249825199466	ENSMUSG00000103901
Tmem236	0.0393606372728715	1	-0.104576586511854	1	ENSMUSG00000061531
Mrc1	-0.111361919469729	0.614025692926584	0.151516515944418	1	ENSMUSG00000026712
Cacnb2	-0.414503719789544	0.0106078847610398	0.112221609424554	0.74003690729555	ENSMUSG00000057914
Gm13268	-0.0682273406240766	0.812208028753305	0.052898556203281	1	ENSMUSG00000070271
Gm37891	-0.0786675373316382	1	0.107378426035988	1	ENSMUSG00000104271
Nsun6	-0.00123911362998145	0.996412700408444	-0.0431933364671504	0.925906747257179	ENSMUSG00000026707
Arl5b	0.623647294479013	2.58846425586169e-13	0.0310815653794985	0.906285124637698	ENSMUSG00000017418
Gm38257	-0.00880913630022516	1	0.0153776139927096	1	ENSMUSG00000102258
Malrd1	-0.0859952050469271	0.677865627784625	0.387117169768046	1	ENSMUSG00000075520
Gm37416	-0.0193002949656177	1	-0.0645275143074297	1	ENSMUSG00000103865
Plxdc2	-1.255296805229	2.0955457342184e-21	0.090114350577948	0.75622876569889	ENSMUSG00000026748
Nebl	-0.539514805631069	0.0105949612551169	1.06115811032034	6.36527911032994e-08	ENSMUSG00000053702
A930004D18Rik	-0.159578940039401	0.302217073755554	-0.0425792008102487	0.903984736735322	ENSMUSG00000054057
Skida1	-0.0960764144260193	0.600738703101017	-0.0917278798722383	0.772295418720455	ENSMUSG00000054074
Mllt10	0.0915028561757676	0.280897690091752	0.0728331346320187	0.600396800728398	ENSMUSG00000026743
Dnajc1	0.151577089482565	0.0579746838093515	0.0126657675844819	0.955651534654949	ENSMUSG00000026740
Commd3	0.00653812679971731	0.966533613732454	0.0796544276219852	0.679899448484282	ENSMUSG00000051154
Bmi1	-0.109081811323285	0.161072235104938	-0.0873601857017922	0.464910709527499	ENSMUSG00000026739
Spag6	-0.153661273711457	1	-0.0846007183116514	1	ENSMUSG00000037708
Pip4k2a	0.167613635879234	0.0998062115535648	-0.139702455988143	0.351047068718485	ENSMUSG00000026737
4930426L09Rik	-0.150726670526673	0.535138532804975	-0.132701513358702	1	ENSMUSG00000026736
Msrb2	-0.0735247478336169	0.809630172547754	-0.151474082948021	0.732848296271883	ENSMUSG00000023094
Otud1	0.484615816155996	0.001493648304493	-0.192464926502748	0.484536001258615	ENSMUSG00000043415
Gm13346	0.0740021872687213	1	0.0253450310358977	1	ENSMUSG00000087246
Etl4	1.86499462675484	5.10615147701406e-63	2.81035328419736	8.34236478090824e-162	ENSMUSG00000036617
Gm13328	-0.0012180730987237	1	-0.104263048695118	1	ENSMUSG00000081128
Arhgap21	0.196044276815056	8.09175090491877e-06	0.206918162660167	7.18805598795433e-06	ENSMUSG00000036591
Gm13375	-0.125535602355625	0.658801664892356	0.24201102189049	0.517021398059271	ENSMUSG00000075514
Enkur	0.245312001929987	0.288753693243305	0.232986958239416	1	ENSMUSG00000026679
Thnsl1	0.330241160911591	0.0697365372290821	-0.0229017338368755	0.963939487570058	ENSMUSG00000048550
Gm13337	-0.0155914365158359	1	0.00666569201966742	1	ENSMUSG00000081467
Gm13342	0.095677400605071	0.634285522281338	0.0157013561251963	1	ENSMUSG00000082516
Gm13341	0.235244281010527	0.339614766306049	-0.0185711519431551	0.97471903456892	ENSMUSG00000083863
Gm13340	0.0838116924518831	0.672965379303822	0.186484080452576	0.457718869744578	ENSMUSG00000083563
Gm13339	-0.242168058342033	1	0.0604547828025414	1	ENSMUSG00000082884
Apbb1ip	-0.241664230317641	0.000810925041808536	-0.107848630715926	0.333687864102562	ENSMUSG00000026786
A130006I12Rik	0.0886420275608263	1	-0.0175693723846681	1	ENSMUSG00000069136
Pdss1	-0.121234291150562	0.393398835401067	-0.0278232612503349	0.932944152594275	ENSMUSG00000026784
Abi1	0.110218378569869	0.0639147596533644	0.0483936626601232	0.668175955798739	ENSMUSG00000058835
Gm13357	0.0128077383728122	1	0.0789414012211583	1	ENSMUSG00000083650
Acbd5	0.218931145532358	0.00145664491098901	0.161251939446246	0.0700849488522382	ENSMUSG00000026781
Mastl	0.207886009415912	0.0124818520432632	0.198323035040027	0.0495281472529612	ENSMUSG00000026779
Yme1l1	0.161788829645726	0.000415726732113949	0.0611858621894106	0.446239706569422	ENSMUSG00000026775
Gm13423	-0.0572757226452405	1	0.0910050892521413	1	ENSMUSG00000081648
Gm13422	0.0211294161188665	1	0.0564456230091737	1	ENSMUSG00000084098
Spopl	0.111850788085207	0.342901315959829	0.169905098687381	0.237204207656129	ENSMUSG00000026771
Gm13331	0.180822463222243	0.485135538903776	-0.0372613452806787	0.951372751299124	ENSMUSG00000081519
Il1rn	-2.59262581533107	5.03268620681007e-134	-0.0316103173737213	0.898909220229837	ENSMUSG00000026981
Psd4	0.00909031478269237	0.973727988704949	-0.148596623290009	1	ENSMUSG00000026979
Pax8	0.00242231733516566	1	0.0307545578441304	1	ENSMUSG00000026976
Gm13415	0.359689516672393	0.116725270310218	-0.0786459748945558	0.887756772785898	ENSMUSG00000085057
Gm13418	-0.0175264369915284	1	0.105902764824515	1	ENSMUSG00000082307
Cacna1b	-0.110729597177022	0.697967902876023	-0.0714267024032325	0.899790150568561	ENSMUSG00000004113
Ehmt1	0.0598159472968441	0.464778895879879	-0.111446295227606	0.241939543914782	ENSMUSG00000036893
Gm37139	0.203308825642725	0.252442087850014	0.0577908492092331	1	ENSMUSG00000102875
Arrdc1	0.321221546682361	0.0631315731896483	0.159937946106945	0.610289551422714	ENSMUSG00000026972
Zmynd19	0.215761454278644	0.00519869865520573	-0.130881109967876	0.249948714059536	ENSMUSG00000026974
Dph7	-0.28774911184399	0.0706910047214319	0.020398336932526	0.962766492854695	ENSMUSG00000026975
Mrpl41	-0.0312360514952667	0.875439046624895	0.112802207477052	0.654926884056671	ENSMUSG00000036850
Pnpla7	-0.338437698024921	0.0445534004888355	-0.0585175439725334	0.889724829830896	ENSMUSG00000036833
Nsmf	-0.220889725547832	0.0336351064729281	0.0889668137649436	0.637160700543807	ENSMUSG00000006476
Nrarp	-0.0669649983160024	1	-0.00840775211938775	1	ENSMUSG00000078202
Tor4a	-0.137791579513958	0.260398200421491	-0.0907864582760557	0.666757253469206	ENSMUSG00000059555
Nelfb	-0.0451183870657232	0.65491922907043	-0.0558868909957085	0.720504469887938	ENSMUSG00000013465
Tubb4b	0.218530961913552	4.43679648540604e-10	0.0382957218940302	0.591211459994325	ENSMUSG00000036752
Ndor1	0.014287624307335	0.930739547866732	0.0481060529883687	0.843532590121711	ENSMUSG00000006471
Tmem203	-0.0649815234319446	0.83045137719734	0.0526928437394978	0.925480920898133	ENSMUSG00000078201
Tprn	-0.16044608807419	0.361269256230233	-0.212296929621027	0.347635811426431	ENSMUSG00000048707
Ssna1	-0.391206426901613	0.000122770483127077	-0.0212728915199209	0.941988414801563	ENSMUSG00000026966
Anapc2	0.00941209721453934	0.910125404977036	0.0149711064889189	0.918475243572124	ENSMUSG00000026965
Grin1	-0.417967722287798	0.0479872745367949	-0.014278896808381	0.979487384444025	ENSMUSG00000026959
AA543186	-0.0479398248967495	0.84371050650609	0.117383496429982	1	ENSMUSG00000097345
Man1b1	0.27328413697543	7.48737425458266e-07	-0.129390605757364	0.0903116367005269	ENSMUSG00000036646
Gm25220	-0.145919424802717	1	0.0283621713948989	1	ENSMUSG00000088171
Dpp7	0.469063884798171	1.63874672679064e-10	0.0112371114439513	0.963569681832138	ENSMUSG00000026958
Uap1l1	0.227305724872963	0.0026094379146754	0.114618575101429	0.32851777054852	ENSMUSG00000026956
Sapcd2	-0.215608629358283	0.325321794284657	-0.0245575798788358	0.963569681832138	ENSMUSG00000026955
Npdc1	-0.365731079393729	3.06921068659119e-05	-0.0279405485086837	0.907456702436008	ENSMUSG00000015094
Abca2	0.188032833084523	0.0795743582832697	0.130484086525374	0.421780491820897	ENSMUSG00000026944
BC029214	0.0630301313459134	0.818512969792961	0.145100206033526	0.706881609507426	ENSMUSG00000047617
C8g	-0.250477910267162	0.137178924221102	-0.171416611021104	1	ENSMUSG00000015083
Fbxw5	-0.15587616872102	0.134886435474114	0.106102898489883	0.519285678340497	ENSMUSG00000015095
Traf2	-0.0347891743644646	0.790665863406528	-0.0628799827565346	0.746517061554089	ENSMUSG00000026942
Edf1	0.116376782689792	0.157171056563796	0.152008088894599	0.10567731013346	ENSMUSG00000015092
Mamdc4	-0.0784166069661039	0.798973452865473	-0.102612135774965	0.839637685990677	ENSMUSG00000026941
Phpt1	-0.124490235552498	0.66173163239284	0.0994553284769896	0.846205658799406	ENSMUSG00000036504
Gm996	-0.435703924446325	0.0306548321713198	0.204827351529893	1	ENSMUSG00000029419
Rabl6	-0.0397525920058302	0.631199172939497	-0.0627932604329652	0.587279773350084	ENSMUSG00000015087
Fcnaos	0.0121805842415241	1	-0.101326506468462	1	ENSMUSG00000052403
Tmem141	-0.16144631744221	0.547693375587041	0.111437972951575	0.822232444021261	ENSMUSG00000026939
Bmyc	-0.244682600561885	0.319226693864067	-0.225044973872388	0.559608456927004	ENSMUSG00000049086
Camsap1	0.294967329816248	2.63262742861436e-07	-0.0859248227042467	0.390489201582975	ENSMUSG00000026933
Ubac1	0.28559055193989	0.00300560724901669	-0.159278828594873	0.272951080771153	ENSMUSG00000036352
Nacc2	0.279113335115066	0.000303308490548975	-0.0227576273044792	0.920742114672997	ENSMUSG00000026932
C330006A16Rik	-0.173738969265598	0.0817015243060295	0.113682942264362	0.457718869744578	ENSMUSG00000087679
Qsox2	0.439814064174215	1.03063140773423e-06	-0.0227213094357388	0.936734670810366	ENSMUSG00000036327
Gpsm1	-0.063888414570248	0.651946000622174	-0.000911959820898849	0.99761996371539	ENSMUSG00000026930
Dnlz	-0.331314479761711	0.00138149728781099	-0.0110657544558456	0.969426117608608	ENSMUSG00000075467
Snapc4	-0.0685872407339433	0.569443517456119	-0.123875014020584	0.425510193130844	ENSMUSG00000036281
Gm13563	-0.159623767231272	0.542487672398807	0.0171865693506918	0.975558518509074	ENSMUSG00000085767
Sdccag3	0.139348929256752	0.0709930160602756	0.00867897079094845	0.966818252509454	ENSMUSG00000026927
Pmpca	0.306177180808496	1.78667534382093e-11	0.0543236470055794	0.555587133122384	ENSMUSG00000026926
Inpp5e	-0.299012976928022	0.0121728356574208	-0.0647866159251906	0.809620670088316	ENSMUSG00000026925
Sec16a	-0.0275812257957326	0.698928253224161	-0.0973914795934805	0.174327311937364	ENSMUSG00000026924
0610009E02Rik	-0.15250535706032	0.513566249517432	-0.119564462715271	1	ENSMUSG00000086714
Notch1	-0.94848889879746	6.56725595986415e-18	-0.0464674279893251	0.86598994509932	ENSMUSG00000026923
Egfl7	-0.423910445761047	0.0274567130196463	-0.257684364399953	0.369559993863649	ENSMUSG00000026921
Agpat2	0.0114289038443796	0.953674782489753	-0.00248995772312756	0.993080845509653	ENSMUSG00000026922
Fam69b	-0.613032543925504	0.00153010295033517	-0.0208809472167185	0.969124552815243	ENSMUSG00000036186
Snora17	0.0814268395974945	0.743892705744289	-0.150904498711029	1	ENSMUSG00000077192
Snhg7os	0.316992294934606	0.0789441496411785	-0.189389856647482	1	ENSMUSG00000086775
Surf6	-0.381474021451234	1.89002003674305e-05	0.00333043775653254	0.989247153703135	ENSMUSG00000036160
Med22	-0.416663124896943	4.91117603291859e-09	-0.0697190218428258	0.625404685589608	ENSMUSG00000015776
Rpl7a	-0.29738285193526	2.02479207643622e-15	-0.0608226982792382	0.331786002290513	ENSMUSG00000062647
Gm23969	0.0672747556632863	0.752614827805771	0.17253850679674	1	ENSMUSG00000065258
Surf1	-0.303019133022769	0.00645156731465918	0.0449254505521084	0.868887197345255	ENSMUSG00000015790
Surf2	-0.13622331209257	0.198193216383453	-0.0419428100711517	0.859065816213701	ENSMUSG00000014873
Surf4	-0.143610454137749	5.1486045831944e-06	-0.0461983919002009	0.377991378803957	ENSMUSG00000014867
Stkld1	-0.066044081453277	1	-0.0412841944877748	1	ENSMUSG00000049897
Rexo4	-0.0514955128260941	0.604915592140451	0.0015637736811562	0.993080845509653	ENSMUSG00000052406
Cacfd1	-0.157791108617743	0.161363343168806	0.0677646316494672	0.753056040583589	ENSMUSG00000015488
Slc2a6	0.0281453357140715	0.902249019291446	-0.0103520713128154	0.979487384444025	ENSMUSG00000036067
Adamtsl2	0.112629048767835	1	-0.159169979351855	1	ENSMUSG00000036040
Sardh	-0.492121751437699	3.83302839686331e-10	-0.00707284485968001	0.975115536424618	ENSMUSG00000009614
Vav2	0.418755431352828	4.31681542516931e-05	0.152196166051878	0.379229897795739	ENSMUSG00000009621
Brd3	0.122101666176013	0.0535645708831582	-0.0690604024899814	0.520218512992194	ENSMUSG00000026918
Wdr5	-0.110175328059428	0.159274267502751	-0.0162573601866699	0.933705455068588	ENSMUSG00000026917
Gm25541	-0.0186092031227312	1	0.130320946800412	1	ENSMUSG00000080538
Gm13421	-0.23352725559809	0.33051024244371	-0.0249850309131518	0.966084578507535	ENSMUSG00000085929
Rxra	-0.0900169649859563	0.22736993243322	-0.00212074940053694	0.989551755653735	ENSMUSG00000015846
2810430I11Rik	-0.235866002671294	0.337714382299141	0.350838965649812	0.238615664391649	ENSMUSG00000085766
Col5a1	0.834582344085069	4.16758808058654e-153	0.244374742032362	7.26808302802427e-13	ENSMUSG00000026837
Olfm1	-0.331092072139623	0.0881365989646447	0.242530391254677	0.406667584261884	ENSMUSG00000026833
Ppp1r26	-0.283083958418796	0.234608944582416	-0.405620534684701	0.152473505796876	ENSMUSG00000035829
Mrps2	-0.0224649810330836	0.867142115891178	-0.0611640840855171	0.744870207327079	ENSMUSG00000035772
Rpsa-ps9	-0.285115793036591	0.22268678551714	0.145191527627673	0.742721978369786	ENSMUSG00000082895
Ralgds	-0.282627888717689	8.06967335582423e-05	0.230505147815872	0.00311057752503924	ENSMUSG00000026821
Gtf3c5	-0.225315016228186	0.0251522148062697	-0.0341375958497276	0.891543049645256	ENSMUSG00000026816
Tsc1	0.0861188069711413	0.332847106056782	0.0497590138471845	0.764715118685365	ENSMUSG00000026812
1700026L06Rik	0.0663028077282351	1	-0.0636281892315621	1	ENSMUSG00000026809
Gtf3c4	-0.115807982672471	0.102302980338107	-0.0545405286622308	0.676913790327066	ENSMUSG00000035666
Ddx31	-0.0447742969580988	0.778213625253873	-0.14967598491703	0.400599902897498	ENSMUSG00000026806
Gm13394	-0.106947539875282	0.708077520375282	0.115361996983901	0.81131472182625	ENSMUSG00000083773
Ttf1	0.0184727144928541	0.923798874709616	0.0305272165106709	0.927466562462663	ENSMUSG00000026803
Setx	0.112045231169832	0.0280525254255568	0.0789255842837492	0.282891256254491	ENSMUSG00000043535
Ntng2	0.19016463892826	0.452321593044597	-0.113403570008818	0.812616542739857	ENSMUSG00000035513
6530402F18Rik	0.188485834364538	0.337714382299141	-0.246949452049979	0.347635811426431	ENSMUSG00000079499
Med27	0.0945206731055863	0.550283792342077	-0.0656418015824368	0.818073056312624	ENSMUSG00000026799
Rapgef1	0.318342873059469	1.86403311236741e-13	-0.0647522839336771	0.40880844504248	ENSMUSG00000039844
Trub2	0.017214117026982	0.907151313827957	0.145919224494827	0.300330888941724	ENSMUSG00000039826
Coq4	-0.0595011073348092	0.793701199982812	-0.133162238788093	0.664967391161383	ENSMUSG00000026798
Slc27a4	0.194252017360601	0.0145969842443347	-0.0490259433047948	0.784284975557066	ENSMUSG00000059316
Urm1	-0.212089969883502	0.043446398671728	0.121575472773515	0.463095882176759	ENSMUSG00000069020
2600006K01Rik	-0.202748251732403	0.402776814243736	0.0709511043175687	0.897271449898522	ENSMUSG00000039798
Cercam	0.0692570262693156	0.587481547009813	0.0672326013134598	0.756146704230217	ENSMUSG00000039787
Odf2	0.299562992867432	1.18907574108001e-07	0.12444792355755	0.126584528750705	ENSMUSG00000026790
Gle1	-0.0848975685380384	0.339281119219866	-0.118065793659103	0.289300727652768	ENSMUSG00000019715
Sptan1	0.307675267051115	7.84009327711956e-33	-0.0265585065659476	0.64256810647787	ENSMUSG00000057738
Wdr34	-0.0802819857912495	0.731226536221396	-0.0331807984974413	0.945184938834814	ENSMUSG00000039715
Set	-0.111904247736649	0.000580492495666961	-0.0923083380897118	0.0156595506285235	ENSMUSG00000054766
Pkn3	0.0556538734597141	0.815972479652407	-0.0427143305644804	0.924257818262997	ENSMUSG00000026785
Zdhhc12	0.634495771425213	1.69030889432547e-07	-0.0107546125514228	0.976819335520453	ENSMUSG00000015335
Zer1	0.111682244425407	0.445662608693932	-0.0197143498870548	0.95623835822617	ENSMUSG00000039686
Tbc1d13	-0.0145748108997191	0.91138124837143	0.00551440840731857	0.981413407394295	ENSMUSG00000039678
Slc39a1-ps	0.0768131101619929	1	0.0520218463571831	1	ENSMUSG00000085401
Endog	-0.0974949444749437	0.738623940941233	0.0449639610684089	0.940539075238677	ENSMUSG00000015337
D2Wsu81e	-0.0949737729711136	0.507209216890257	-0.118529571047469	0.577829741210838	ENSMUSG00000039660
Ccbl1	0.0147485874130799	0.965637597070168	0.1228759341975	0.798209847132709	ENSMUSG00000039648
1700084E18Rik	-0.0786292895813608	0.696926303413174	0.0903904042406215	1	ENSMUSG00000100747
Lrrc8a	-0.0409140626418865	0.841123347679489	-0.43713668023179	0.00532734763495451	ENSMUSG00000007476
Gm28035	0.0228684845658176	1	-0.102715781745059	1	ENSMUSG00000099041
Phyhd1	-0.0815780165366345	0.784352736517543	0.285046742954769	0.389060980856626	ENSMUSG00000079484
Dolk	-0.0260900544874633	0.897039570476114	0.0986366106919799	0.71211110221019	ENSMUSG00000075419
Nup188	0.153068043313747	0.00177890176593829	-0.148843987030291	0.00834813395423326	ENSMUSG00000052533
Gm14471	-0.0505354470378284	1	0.0385523729397373	1	ENSMUSG00000084892
Sh3glb2	-0.00192647137645371	0.988968307598585	0.110871898714043	0.406667584261884	ENSMUSG00000026860
Fam73b	-0.0759280778655199	0.524950891107572	0.0823031886597024	0.664648596190405	ENSMUSG00000026858
Dolpp1	0.257959967829275	0.0511352591154079	-0.0644940345913128	0.830522780269885	ENSMUSG00000026856
Crat	0.104326266726242	0.291633556307165	0.0847947032048383	0.589158408934255	ENSMUSG00000026853
Ppp2r4	-0.282922107407985	5.269205324987e-11	-0.052057311975328	0.513640620786798	ENSMUSG00000039515
Ier5l	-0.224561024253493	0.339954252766561	0.114688860103497	0.798819033509731	ENSMUSG00000089762
Cstad	-0.248888063190948	1	0.0354655873164017	1	ENSMUSG00000047363
Gm14488	-0.282078107488774	1	-0.0327626124208014	1	ENSMUSG00000075416
1700001O22Rik	-0.083179111910356	1	-0.0891181296022242	1	ENSMUSG00000044320
Ntmt1	-0.179070545248441	0.100885392130796	-0.0384096475050802	0.880037918349406	ENSMUSG00000026857
Asb6	-0.0835848930196043	0.435658684356412	0.127494890883353	0.334214147567634	ENSMUSG00000039483
Prrx2	-0.604148023394758	7.71293098350864e-15	0.334070668013778	6.73969398972213e-05	ENSMUSG00000039476
Ptges	-0.17869592705984	0.0533124277766391	0.318585528533044	0.000263456587055066	ENSMUSG00000050737
Tor1b	0.274481005648886	6.88787512644104e-06	-0.0201714981766837	0.908503731234112	ENSMUSG00000026848
Tor1a	0.125320167039853	0.268798421882206	0.00493242192844873	0.985828289268003	ENSMUSG00000026849
BC005624	0.0271199530989809	0.842445508357754	0.0611874089379219	0.758469833922512	ENSMUSG00000026851
Usp20	-0.0822001453862984	0.472645212368602	-0.0596980410328114	0.764715118685365	ENSMUSG00000026854
Fnbp1	0.00135794220256235	0.988968307598585	-0.0585760921378725	0.599036419995684	ENSMUSG00000075415
D330023K18Rik	-0.326219694423768	0.145417738628514	0.110598885049295	0.815169740635533	ENSMUSG00000087269
Gpr107	0.148531188034897	0.0327019388181608	0.0153237279606926	0.935800554860355	ENSMUSG00000000194
Gm22516	-0.00660134051832795	1	-0.0146164277873132	1	ENSMUSG00000088891
Ncs1	-0.268096030525961	4.20551719662153e-07	-0.0728187585532032	0.417232111540902	ENSMUSG00000062661
Hmcn2	0.182125529925371	0.482649125183318	0.367666557339767	0.204242990747782	ENSMUSG00000055632
Ass1	-0.108878682501766	0.329951543963003	0.137828779984821	0.303404860808297	ENSMUSG00000076441
Fubp3	0.043947923780151	0.570873036578402	0.0607744145683233	0.588977805727138	ENSMUSG00000026843
Exosc2	-0.276679537498615	0.000377742489362576	-0.0742081508524133	0.620084680955911	ENSMUSG00000039356
Abl1	-0.255213481709341	8.52742886169229e-09	-0.0561993966456719	0.484193815723242	ENSMUSG00000026842
Qrfp	0.152334068727345	1	0.0298742357116547	1	ENSMUSG00000043102
Fibcd1	0.0682371903113041	1	0.0824382861873095	1	ENSMUSG00000026841
Lamc3	0.665815714741681	0.000340487102059292	0.0871265655431972	1	ENSMUSG00000026840
Aif1l	0.529002724146842	3.7196077741813e-05	0.114053295659527	0.670173159561018	ENSMUSG00000001864
Nup214	0.0495699778520459	0.538879620149809	-0.114505603233749	0.198921962051369	ENSMUSG00000001855
Plpp7	-0.0812438310033961	1	-0.0190762045345645	1	ENSMUSG00000051373
Prrc2b	-0.0888606722692712	0.0192578950847788	-0.0760465301950509	0.113128437504552	ENSMUSG00000039262
Gm22192	0.0566973493139077	1	-0.0673139608131813	1	ENSMUSG00000094382
Gm25632	-0.0418323541869593	1	-0.0372952101782033	1	ENSMUSG00000094251
Gm13610	-0.160840049276975	0.409973187266306	0.0363123048996994	1	ENSMUSG00000086216
Pomt1	-0.321991263758471	0.00425024324016986	-0.0624128620314969	0.807495495638315	ENSMUSG00000039254
Uck1	-0.164343765592008	0.162767882052294	0.0296595791358887	0.913527043010166	ENSMUSG00000002550
Gm13611	0.0206579644991578	1	0.0698928892768189	1	ENSMUSG00000066068
Swi5	-0.0559831169627424	0.261987750458523	0.0869816270556258	0.12743525277232	ENSMUSG00000044627
Golga2	0.191179052308983	0.000115704774085942	0.0737494291274923	0.375854318828872	ENSMUSG00000002546
Dnm1	-0.17706184151521	0.00189832535429619	0.376641877426266	5.97931714839907e-13	ENSMUSG00000026825
Ciz1	-0.143013244412123	0.0688084580460643	-0.0113869791102808	0.958095330456932	ENSMUSG00000039205
1110008P14Rik	0.113607068844133	0.601720452840051	0.224683455061073	0.37494318528272	ENSMUSG00000039195
Ptges2	-0.219424284921522	0.101366765096656	-0.0252034175146817	0.942250584531726	ENSMUSG00000026820
Slc25a25	0.363432324607287	0.000307493036723339	0.0751604923712829	0.742929826221258	ENSMUSG00000026819
Naif1	0.0333779992419944	0.881574778823994	-0.048420279453493	0.903984736735322	ENSMUSG00000039164
Fam102a	-0.0411323498048905	0.894789474810778	0.0790351787083492	0.874554207231028	ENSMUSG00000039157
Dpm2	-0.257667342192875	0.00524488193935165	-0.00310937161917725	0.989247153703135	ENSMUSG00000026810
Pip5kl1	-0.120633283832017	1	0.157121704907225	1	ENSMUSG00000046854
St6galnac4	-0.300083234293622	0.0145559538831697	0.0256530074316236	0.938166050369174	ENSMUSG00000079442
St6galnac6	-0.355728317160901	1.19579042727167e-05	0.212601159942401	0.0274121700284509	ENSMUSG00000026811
Ak1	-0.680068714925187	1.22762097318405e-17	0.279485951882952	0.00141023405297334	ENSMUSG00000026817
Eng	0.301709733589997	8.94050251410212e-06	-0.024721873029541	0.898909220229837	ENSMUSG00000026814
Fpgs	-0.294867209755334	0.000967784850677307	-0.093222357704177	0.572326496416178	ENSMUSG00000009566
Cdk9	-0.13778846421923	0.0622761348925669	-0.0750222962927413	0.54998953475174	ENSMUSG00000009555
Sh2d3c	-0.00939980623736105	0.972785863263644	-0.0199124236277457	1	ENSMUSG00000059013
Ttc16	-0.0283118448291755	1	0.0812009966307035	1	ENSMUSG00000039021
Tor2a	0.387081494727749	0.00136270159134418	-0.0172271729251439	0.962766492854695	ENSMUSG00000009563
Ptrh1	0.109662236438075	0.498299655286811	0.137192320423803	0.541192222081641	ENSMUSG00000053746
Stxbp1	0.329144823215015	1.91524397758205e-08	0.0510759772678046	0.699258900470317	ENSMUSG00000026797
Gm13523	0.0177112384335638	1	0.0109468298138557	1	ENSMUSG00000087496
Fam129b	0.198205481143524	3.96706818853528e-09	0.377617949983149	2.80938493614247e-31	ENSMUSG00000026796
Lrsam1	-0.463361900768687	5.91488857935494e-05	-0.258295749847278	0.0825605834544994	ENSMUSG00000026792
Rpl12	-0.301824287229388	5.00325784563765e-21	0.029940532044552	0.67308694882794	ENSMUSG00000038900
Slc2a8	0.0882787355182964	0.765560293960348	0.218455798249361	0.573244446582754	ENSMUSG00000026791
Garnl3	-0.272785264906587	0.201590011245718	-0.00904846869692527	0.985828289268003	ENSMUSG00000038860
Gm38299	-0.0801982025619153	1	-0.0345743950242614	1	ENSMUSG00000104277
Ralgps1	0.558678720306556	0.000402331598378356	0.191373765843617	0.496687056284721	ENSMUSG00000038831
Angptl2	0.34328229746037	7.56770942290437e-23	0.203100057268776	8.29244352426385e-08	ENSMUSG00000004105
Zbtb34	0.600441122144167	3.44315554430233e-06	-0.00481452901581245	0.989551755653735	ENSMUSG00000068966
Zbtb43	0.385752467240539	0.000284832429750506	-0.0611069017527877	0.813962555533482	ENSMUSG00000026788
Mvb12b	-0.349705409537044	0.000219593622087624	0.0160575355081299	0.954407506855427	ENSMUSG00000038740
C230014O12Rik	0.0613858302688232	1	0.105243133959018	1	ENSMUSG00000087461
Pbx3	0.468494134097985	1.11306005764281e-06	0.200550593020959	0.155074962950973	ENSMUSG00000038718
Mapkap1	0.0444303666047998	0.672846446213035	0.0322621647850983	0.872561629089186	ENSMUSG00000038696
Gm13408	-0.0963715645427329	0.744146668405882	-0.0901006834200853	0.86598994509932	ENSMUSG00000081992
Gm13414	0.138458052978943	0.479384734557242	0.0594016817944879	1	ENSMUSG00000087635
Gapvd1	0.265357800868303	1.89435573341912e-08	-0.101789293550946	0.14781672221136	ENSMUSG00000026867
Hspa5	0.396630468324041	1.21465441523059e-56	-0.203260638949121	2.29203478027478e-14	ENSMUSG00000026864
Rabepk	-0.131369400627706	0.283791259199853	-0.0794235968589896	0.722876991426437	ENSMUSG00000070953
Fbxw2	0.0095583070820607	0.941135676804015	0.060836391389974	0.717075395481121	ENSMUSG00000035949
Psmd5	0.138862488813933	0.0225046123657291	0.019929664806629	0.901617735989684	ENSMUSG00000026869
Phf19	-0.315528810476476	0.00594780219220825	-0.0789426598974971	0.741530694558825	ENSMUSG00000026873
Traf1	0.861171567124212	1.38599185232097e-06	0.509868155046996	0.021943890793118	ENSMUSG00000026875
Hc	-0.0376575992401914	1	0.0536036854031616	1	ENSMUSG00000026874
AI182371	0.0319870803497531	1	0.00409150148948166	1	ENSMUSG00000035875
Cntrl	0.240557064393932	0.00821752496828809	0.0845924967096127	0.637072982835975	ENSMUSG00000057110
Rab14	0.22969241653663	2.62838068691094e-07	0.0688757320652351	0.362857185795593	ENSMUSG00000026878
Gsn	-0.010328693302763	0.826395897189915	-0.0517005982575531	0.277084105585051	ENSMUSG00000026879
Gm43128	-0.0418692353450262	0.895227093600186	-0.234346156928628	0.51064024466948	ENSMUSG00000106961
Stom	0.167254684713589	0.0139294227161601	0.260875506916793	0.000118654901284979	ENSMUSG00000026880
Gm13443	-0.116976969731706	0.647929678636112	0.17163976159262	1	ENSMUSG00000075391
Ggta1	-0.0196299912945349	0.861913072086158	0.0218957577087635	0.913290981439263	ENSMUSG00000035778
Gm13446	-0.180559541898123	1	-0.10548045513899	1	ENSMUSG00000086555
Dab2ip	0.30330295177083	1.01471092429759e-06	-0.0256909424336665	0.881663927582817	ENSMUSG00000026883
Ttll11	-0.645401380416114	0.00127391010333361	-0.420240938210089	0.110979503684477	ENSMUSG00000026885
Ndufa8	-0.133671299291266	0.0682869865554163	0.0576293734065524	0.673378337890835	ENSMUSG00000026895
Morn5	-0.039324983594526	1	0.0301751131927079	1	ENSMUSG00000026894
Lhx6	-0.655833755655226	2.24111470450791e-07	0.135786887613388	0.557055608418352	ENSMUSG00000026890
Rbm18	-0.0846358496991045	0.363869937887943	-0.00411511039264124	0.985676611059401	ENSMUSG00000026889
Mrrf	0.0766613715392042	0.575072782099243	-0.033492394294426	0.908740087642126	ENSMUSG00000026887
Ptgs1	0.203954935155252	0.000833849326686647	0.56597622069453	5.40730148850212e-24	ENSMUSG00000047250
Gm13430	0.0125126872689366	1	0.0253205317135437	1	ENSMUSG00000083101
Gm13436	-0.12981526984166	0.47264144402909	-0.00441248475838813	0.990216857729521	ENSMUSG00000083716
Pdcl	0.180937630582814	0.078464020426009	0.232290665239031	0.0531700173902264	ENSMUSG00000009030
Rc3h2	0.275631910768995	1.9492781651083e-06	0.236636310835003	0.000277555623579304	ENSMUSG00000075376
Zbtb6	0.00376723344658964	0.980013992939495	0.298878945135474	0.00360555145038	ENSMUSG00000066798
Zbtb26	-0.0727797177073621	0.722295343659947	0.098116037325666	0.757703062062945	ENSMUSG00000050714
Rabgap1	0.150235242375005	0.00918451724768729	0.228928343258373	9.95563280846929e-05	ENSMUSG00000035437
Strbp	0.619217554854277	2.7326328174165e-16	0.0330519126676471	0.886069094533972	ENSMUSG00000026915
Gpr21	-0.0909094627461793	1	0.106147669421208	1	ENSMUSG00000053164
Crb2	0.0503729193198781	1	0.0528162620618994	1	ENSMUSG00000035403
Dennd1a	-0.106544259688192	0.459472318729562	0.0876426396037399	0.720174330395085	ENSMUSG00000035392
Nek6	-0.352564700438735	2.35421152143591e-06	-0.123481504388644	0.270803242722515	ENSMUSG00000026749
Psmb7	0.175286448704204	0.000553751797044842	0.0515941723751396	0.603880277947985	ENSMUSG00000026750
Nr6a1	0.381220681978889	0.00934442652235513	0.0248369054157256	0.95623835822617	ENSMUSG00000063972
Nr6a1os	-0.0594406106197227	1	0.00179615707067338	1	ENSMUSG00000085201
Olfml2a	-0.296449675814314	0.0811943666635148	0.127937832296738	1	ENSMUSG00000046618
Gm13496	-0.0130570523418789	1	0.0249608207981447	1	ENSMUSG00000085755
Wdr38	0.261847269141316	0.206278985350315	0.0232289021053612	1	ENSMUSG00000035295
Rpl35	-0.20202292985801	1.90263379426632e-08	0.0302438606714169	0.703583715200147	ENSMUSG00000062997
Arpc5l	-0.0485859809656405	0.639227254883219	0.00182447265397557	0.992051066469344	ENSMUSG00000026755
Golga1	0.308934649820334	0.00012447317588167	0.00630286723262547	0.979031530059649	ENSMUSG00000026754
Scai	-0.22914353607518	0.00983605793432032	0.184007858753354	0.0936230771811155	ENSMUSG00000035236
Ppp6c	0.589660892640532	3.36719731489286e-18	0.0230607808923757	0.911277426910183	ENSMUSG00000026753
Gm13453	-0.100719177818393	0.602283933420403	0.0971877064886755	1	ENSMUSG00000083240
Gm13456	-0.11519748120592	0.240669932616449	0.119357469532593	0.374944841285002	ENSMUSG00000082536
Gm13461	0.0621655722976397	0.829509149214825	-0.0783908744666025	0.875456198663673	ENSMUSG00000081999
Gm13464	0.0185259187858832	1	-0.0587013991243288	1	ENSMUSG00000080994
Gtdc1	0.0355422131234611	0.899293409434775	0.0248612574018043	0.962766492854695	ENSMUSG00000036890
Zeb2	0.304949597000871	5.43229401093637e-07	0.155624381591919	0.0536381700482461	ENSMUSG00000026872
Zeb2os	0.0574283231205254	0.842202129304011	0.258970372187868	1	ENSMUSG00000052248
Gm13470	-0.0478846382322996	0.859150135143045	0.21963200323567	1	ENSMUSG00000086644
Acvr2a	0.457524035169345	3.72294580374283e-05	-0.131013878307748	0.541192222081641	ENSMUSG00000052155
Orc4	0.157834048304761	0.0480269741540491	0.0152519516912505	0.945228672785912	ENSMUSG00000026761
Mbd5	-0.000613364142333984	0.996658534297193	0.0154436424474884	0.958095330456932	ENSMUSG00000036792
Gm13509	-0.10390927993538	0.371952685723756	0.00767694108440597	0.977287017919614	ENSMUSG00000081272
Epc2	0.182924455303216	0.0187839792022682	0.0513292293754443	0.760152240555423	ENSMUSG00000069495
Kif5c	0.109055531977498	0.475125599742878	-0.133467245232734	0.550764361319871	ENSMUSG00000026764
Lypd6b	-0.0815385060053278	1	-0.0848643030814876	1	ENSMUSG00000026765
Lypd6	-0.889440615262755	9.70704039983947e-08	-0.300405541687523	0.221842063973966	ENSMUSG00000050447
Mmadhc	-0.011441443751529	0.917418071553381	-0.0979753941177175	0.39786392876613	ENSMUSG00000026766
Gm13483	0.00911790937429478	0.976409918761976	0.0323854921575447	1	ENSMUSG00000085862
Rnd3	-0.585170840666946	3.58297481241205e-27	-0.0418269766417189	0.74003690729555	ENSMUSG00000017144
Gm13493	-0.132713213833878	0.615699387670264	0.520271755795836	0.0283046588956522	ENSMUSG00000087701
Rbm43	-0.302358041836759	0.0620854836944893	0.0757070440072085	0.835469314021925	ENSMUSG00000036249
Nmi	0.671905711287872	0.000512522102346093	-0.118403904334392	0.794721898740342	ENSMUSG00000026946
Tnfaip6	-0.645482921218085	0.000160981300317333	0.287174214306031	0.253182311003285	ENSMUSG00000053475
Rif1	0.136397499194839	0.0113844006507154	-0.164406229084392	0.00635025289457163	ENSMUSG00000036202
Neb	-0.205522630821877	0.420710137682406	-0.131619725461085	0.776078916622766	ENSMUSG00000026950
Arl5a	-0.208339011077563	0.00044466317020972	0.0350856240054865	0.795676049609383	ENSMUSG00000036093
A430018G15Rik	-0.0918635133474902	0.752752346006916	-0.0336508002166371	0.9575464550696	ENSMUSG00000085315
Cacnb4	-0.26388899076335	0.185102369519218	-0.0850239127333409	1	ENSMUSG00000017412
Bloc1s2-ps	-0.036273453205117	0.882725791186874	-0.00424635280400143	1	ENSMUSG00000025201
Stam2	0.283249945652418	4.18000746213271e-05	0.0448663046947929	0.787500098105567	ENSMUSG00000055371
Fmnl2	-0.0716323061838768	0.306004841341302	-0.0151439386555256	0.92579293628216	ENSMUSG00000036053
Prpf40a	0.153552342225642	0.000493131112041572	0.0400824551055482	0.657534714892337	ENSMUSG00000061136
Arl6ip6	0.108175466534594	0.352735873384154	-0.0129211984395169	0.963569681832138	ENSMUSG00000026960
Gm13502	0.107383599933613	0.708256786616996	0.00100835824380137	0.998407300355408	ENSMUSG00000083287
Rprm	-0.083998566357572	0.734818095232289	0.181522921966777	1	ENSMUSG00000075334
Galnt13	-0.720849414073691	4.32471058948007e-15	-0.191254113181825	0.125067113677652	ENSMUSG00000060988
Nr4a2	-0.427383942636085	0.000449783790693913	0.52312280010316	6.76342077327874e-06	ENSMUSG00000026826
BB557941	-0.225074735624773	0.274025880154146	0.0102369467655277	1	ENSMUSG00000084938
A930012O16Rik	-0.123745314475836	0.574802192439532	0.0971409224252497	1	ENSMUSG00000054181
Gpd2	0.127090532967048	0.0356870095729463	0.118965864207957	0.114064285648389	ENSMUSG00000026827
Galnt5	0.0257641994704027	1	-0.0547690996227245	1	ENSMUSG00000026828
Acvr1c	-0.0134792284048416	1	0.00393254617339626	1	ENSMUSG00000026834
Acvr1	-0.202397594406324	0.00346967219612137	0.021724548267489	0.90645063804257	ENSMUSG00000026836
Upp2	-0.0636672161175146	0.837505434041999	0.141786005518148	0.757077709829961	ENSMUSG00000026839
Ccdc148	-0.0242295237386978	0.942972271823278	0.117328296127572	0.809008600517507	ENSMUSG00000036641
Pkp4	0.326283957272034	1.25395848776688e-08	-0.0509915094502464	0.69391354744441	ENSMUSG00000026991
Gm13552	-0.00525006504210998	1	0.101475816823183	1	ENSMUSG00000081157
Tanc1	0.224171199080171	6.21961400156157e-05	-0.0106002052602199	0.950925823426022	ENSMUSG00000035168
Wdsub1	0.157633937943976	0.26052758586593	-0.0594340390693945	0.841445663643965	ENSMUSG00000026988
Baz2b	0.125249733822726	0.150145643280112	0.062665862636277	0.706478997030513	ENSMUSG00000026987
Gm13620	0.00963565469529732	1	0.0269754536267991	1	ENSMUSG00000086603
March7	0.0448266063497589	0.588595192911614	0.189468987296955	0.00802432351422329	ENSMUSG00000026977
Cd302	-0.48163653505959	0.000308489271488162	-0.0346981068118712	0.922973315665711	ENSMUSG00000060703
Gm13573	-0.0174075557935785	1	0.0515774718116956	1	ENSMUSG00000080198
Ly75	0.107113919927584	0.218960769505656	-0.272170587806535	0.00124973795575795	ENSMUSG00000026980
Pla2r1	0.421434638179529	0.0591188529395619	0.528374476684425	0.0367757627739988	ENSMUSG00000054580
Itgb6	0.0359776307278467	1	0.0531176936399876	1	ENSMUSG00000026971
Rbms1	0.213181424943144	4.20551719662153e-07	0.0977187339992355	0.0904154833861807	ENSMUSG00000026970
Tank	0.0332759632378303	0.717257361985632	0.0672485708056648	0.596860426067918	ENSMUSG00000064289
Psmd14	-0.00707755480779898	0.940376139620293	0.0447836302808603	0.711868494327917	ENSMUSG00000026914
Gm25966	0.0885981323072144	1	0.00535168530622627	1	ENSMUSG00000087794
Tbr1	-0.013992167735814	1	0.00619448292576381	1	ENSMUSG00000035033
Slc4a10	-0.127985023550053	1	-0.0438835992815451	1	ENSMUSG00000026904
Fap	-0.153884425899662	1	-0.141079239966839	1	ENSMUSG00000000392
Ifih1	0.215133039844135	0.365375008207103	-0.249159649902584	0.464963203794228	ENSMUSG00000026896
Gca	0.0838271131662753	0.780645187371799	0.0274189603979986	0.964684773236807	ENSMUSG00000026893
Fign	0.185449023405852	0.408312418714201	0.181354158334313	0.610364174916816	ENSMUSG00000075324
Gm13577	0.0657923801608394	0.831802427829782	-0.0108183332700968	0.985800323756329	ENSMUSG00000082127
Gm13578	-0.124018238765895	0.552953933887167	-0.207305857767323	1	ENSMUSG00000084104
Grb14	-0.902655215929926	5.41298623174773e-07	0.296015705581083	0.268054215935086	ENSMUSG00000026888
Cobll1	0.0129914993660617	0.905606321846064	0.140318449986641	0.131819457960484	ENSMUSG00000034903
Gm13594	-0.0804688121707929	1	0.0065248208354849	1	ENSMUSG00000086881
Scn3a	-0.469585736961839	0.0313455558643385	-0.519029009291951	0.0408304179216753	ENSMUSG00000057182
Scn2a1	-0.175762799403562	0.426291091645384	-0.219002370144231	0.472374538260234	ENSMUSG00000075318
Galnt3	-0.138957113129691	0.557913313123044	-0.0402378749063742	1	ENSMUSG00000026994
Ttc21b	-0.172404693910997	0.0766344246063491	-0.0362760363880033	0.873629452579361	ENSMUSG00000034848
Scn1a	-0.160992145984198	1	0.0721365382586808	1	ENSMUSG00000064329
Scn9a	0.112617466710826	1	0.1352972166645	1	ENSMUSG00000075316
Xirp2	0.0681453627343137	1	-0.0158247698351307	1	ENSMUSG00000027022
B3galt1	-0.473150414456614	0.00858385051513348	-0.0845676668252209	0.840369992707801	ENSMUSG00000034780
Stk39	0.0149349345518037	0.906815281902471	-0.124240032305938	0.31844067287048	ENSMUSG00000027030
Gm13597	0.125789341427962	0.571601506503051	0.022270142630795	1	ENSMUSG00000075312
Cers6	0.434704601212461	1.69131750350917e-21	0.413888290313424	6.52080142367808e-19	ENSMUSG00000027035
Gm38377	-0.245491007280125	1	0.0527404568803261	1	ENSMUSG00000102662
Nostrin	0.227037694745755	0.277138562920931	0.235266218440679	1	ENSMUSG00000034738
Spc25	-0.0752610834667752	0.485446458396092	0.169125521017618	0.145135249232473	ENSMUSG00000005233
Abcb11	0.0613938378298467	1	-0.128040247842769	1	ENSMUSG00000027048
Dhrs9	1.23568728275804	1.02157624914089e-29	-0.244681299696432	0.180440341036087	ENSMUSG00000027068
Lrp2	0.106033051907829	0.680809340319918	-0.382499378627275	0.131599437108295	ENSMUSG00000027070
Bbs5	0.0938273087307634	0.70183488711008	0.204530631048604	0.511787803732866	ENSMUSG00000063145
Klhl41	-0.2356959349064	1	0.179751804794591	1	ENSMUSG00000075307
Fastkd1	-0.0487629584836345	0.830213510836169	-0.0181435981353198	0.966694973993062	ENSMUSG00000027086
Ppig	-0.134381111719692	0.0086123692064607	0.0868415830607526	0.219499558148428	ENSMUSG00000042133
Ccdc173	0.224784893072703	0.33025406113403	-0.0423885437093443	1	ENSMUSG00000070883
Phospho2	-0.160302035138434	0.331438192405752	0.0954694970392539	0.748920140880788	ENSMUSG00000027088
Gm13624	-0.016957449315788	1	0.0504730795113008	1	ENSMUSG00000081857
Klhl23	-0.691459618382042	4.79488808969118e-09	-0.187015767805776	0.313179571977121	ENSMUSG00000042155
Ssb	0.089456223289362	0.0653205116322952	0.0221621135639315	0.84132518404524	ENSMUSG00000068882
Mettl5	0.283079772698375	0.145613977552375	0.0514740050689484	0.914553358940016	ENSMUSG00000051730
Gm13625	0.0611537530928303	1	0.0833323281804949	1	ENSMUSG00000089902
Mettl5os	-0.0935689629380148	1	-0.0284700050670376	1	ENSMUSG00000085735
Ubr3	0.416206236306642	7.35524691083994e-16	0.119277592612715	0.113128437504552	ENSMUSG00000044308
Rpl9-ps7	0.0714614360218187	0.812560512196379	0.234441059835158	0.520571206060695	ENSMUSG00000047965
Gad1os	-0.0159150106339976	1	-0.0143491265954936	1	ENSMUSG00000087264
Erich2os	-0.0933938288744685	1	0.0299012020006946	1	ENSMUSG00000086515
Erich2	-0.0646042905093061	1	0.102297946229049	1	ENSMUSG00000075302
Gorasp2	0.038890121109241	0.48428566486123	0.00408040840344892	0.974430104211793	ENSMUSG00000014959
Tlk1	0.376268238132577	8.82640477934034e-11	0.0154218928350919	0.932249824662582	ENSMUSG00000041997
Mettl8	-0.0395758499907609	0.855815769622977	-0.076158065678878	0.822848719871376	ENSMUSG00000041975
Dcaf17	0.326368118224159	0.0270074691556521	0.0389858329471996	0.920086505235801	ENSMUSG00000041966
Cybrd1	-0.120738749690416	1	-0.010916108501996	1	ENSMUSG00000027015
Dync1i2	0.143956849033466	0.00186122943236163	0.00166824367269101	0.989247153703135	ENSMUSG00000027012
Slc25a12	-0.2430862685562	0.00148355789204272	0.00836863369200639	0.969426117608608	ENSMUSG00000027010
Hat1	0.143717245709013	0.0158861272853036	-0.095377029281461	0.2717936509894	ENSMUSG00000027018
Metap1d	0.0921826938890566	0.46986549277082	0.246797730252401	0.0495090221737532	ENSMUSG00000041921
Dlx1	-0.670370123860278	0.000201152331375829	0.326889362412568	0.196810977380752	ENSMUSG00000041911
Dlx2	-0.661588036434965	0.000890927158733526	-0.121501545637534	0.787803829413477	ENSMUSG00000023391
Itga6	0.218321598080141	1.35716746934666e-05	0.0204660658884077	0.881663927582817	ENSMUSG00000027111
Pdk1	-0.499175322224002	1.6917209769194e-13	-0.107778388390716	0.332995597146965	ENSMUSG00000006494
Rapgef4	0.45500883692269	0.0338557139069535	0.5447186399812	0.0250622840688473	ENSMUSG00000049044
Zak	0.00671218030179118	0.941795209438882	-0.308920972715238	2.11263088835804e-08	ENSMUSG00000004085
Cdca7	-0.421831470897362	2.96763127761028e-07	-0.142133286277324	0.243197118859857	ENSMUSG00000055612
Ak3l2-ps	0.0671657956949388	1	-0.0108928923948515	1	ENSMUSG00000081957
Sp3	-0.0326925202466927	0.661833982751474	0.120907325676279	0.0841595492214834	ENSMUSG00000027109
Sp3os	0.00470825233956852	0.989232814710904	-0.166215836247349	0.70338039868037	ENSMUSG00000063714
Ola1	-0.114065428728817	0.0694330588358598	0.0927343960031538	0.284969357090377	ENSMUSG00000027108
Cir1	0.0865360186465725	0.628258802290583	0.0214247204173408	0.95780084604222	ENSMUSG00000041777
Scrn3	0.202514742567319	0.0608525954954042	0.0442905203734536	0.86598994509932	ENSMUSG00000008226
Gpr155	0.413870442200254	0.0422934752700817	0.176118067108723	0.650571066229683	ENSMUSG00000041762
Wipf1	0.0549217865287538	0.486639921790565	-0.0113669990345836	0.950527514497838	ENSMUSG00000075284
Chrna1	0.181697193469818	1	-0.0422585801442795	1	ENSMUSG00000027107
Chrna1os	-0.0349348597975732	0.904841214836304	0.0989900565136804	1	ENSMUSG00000086382
Chn1os3	0.201915087887788	0.256194915640865	0.304572650160959	1	ENSMUSG00000086544
Chn1	-0.350918130788952	0.0986182948269827	0.13109274687286	0.75395338862204	ENSMUSG00000056486
Atf2	-0.033765748785603	0.710587794868954	-0.00238705665876285	0.989247153703135	ENSMUSG00000027104
Gm10822	-0.0810268733092589	1	0.00629559426245217	1	ENSMUSG00000097377
Atp5g3	-0.172297515969324	0.0456085751519005	0.090211246491098	0.531651548011482	ENSMUSG00000018770
Lnp	0.133888456021824	0.157844704251863	0.0430038239563275	0.835834398440348	ENSMUSG00000009207
Mrpl23-ps1	-0.183480266778067	0.337571273997485	0.127918010533356	1	ENSMUSG00000075279
Hoxd9	-0.0655504820194285	0.767709725828905	0.0164684588133129	1	ENSMUSG00000043342
Hoxd3os1	0.141111038949223	0.490281388160665	0.126235614151728	1	ENSMUSG00000052371
Hoxd8	-0.0633337779667718	0.829920287101141	-0.0971695575514171	0.840369992707801	ENSMUSG00000027102
Hoxd4	0.0137271905478585	1	-0.143150173840639	1	ENSMUSG00000101174
Gm28230	0.0109871807325448	1	0.102519374095242	1	ENSMUSG00000100642
Mtx2	0.11899172402928	0.271328028903152	-0.0996554791057072	0.5727644915277	ENSMUSG00000027099
Rps6-ps4	-0.174625625888403	0.426318513340177	-0.0809726909526544	0.856903663995865	ENSMUSG00000081406
Hnrnpa3	0.200774318376424	5.83374071469844e-11	-0.029331946261568	0.661836465196809	ENSMUSG00000059005
Nfe2l2	0.180336596911334	0.000235541191364899	0.168977245306516	0.00219355134234074	ENSMUSG00000015839
E030042O20Rik	0.0525923342241195	0.82597641075502	0.0850029335854732	1	ENSMUSG00000087222
Gm13669	-0.277045400607327	0.176954903680093	0.040814030984552	1	ENSMUSG00000081833
Agps	0.398908973465451	5.62511052378878e-20	0.10516073078077	0.0960655781495566	ENSMUSG00000042410
Ttc30b	-0.155283926872296	0.485340368307855	0.0372342438158711	0.941101230742032	ENSMUSG00000075273
Ttc30a2	-0.135780764777722	1	0.0298601471958069	1	ENSMUSG00000075272
Ttc30a1	-0.158387026827866	0.475933911079689	0.0233513611576245	0.964684773236807	ENSMUSG00000075271
Rbm45	0.0816937159737172	0.467929811656993	-0.110688282215746	0.476369522087905	ENSMUSG00000042369
Osbpl6	-1.13085263570847	3.29220604686901e-31	0.132988126329401	0.392810167900124	ENSMUSG00000042359
Prkra	-0.0198621960283801	0.915191088015376	0.0324692080665644	0.919487340275774	ENSMUSG00000002731
Fkbp7	-0.344176207538228	0.00351408866735969	0.0416386316157778	0.897881926090514	ENSMUSG00000002732
Plekha3	0.43668408770766	8.14743710302717e-11	-0.00805299319279206	0.969594731783362	ENSMUSG00000002733
Ccdc141	-0.406125033086436	0.0172341743611061	0.0635289153654534	0.883745697634873	ENSMUSG00000044033
Sestd1	0.241861620180582	0.000106992246798382	0.260173956943172	9.70058141282903e-05	ENSMUSG00000042272
Gm13650	-0.0116208547665882	1	0.0434263412187728	1	ENSMUSG00000084087
Gm13651	-0.0354900541350844	1	0.0312388216308428	1	ENSMUSG00000081611
Zfp385b	0.080164962166444	0.736515563981713	-0.0622608848054195	1	ENSMUSG00000027016
Cwc22	-0.17376986015859	0.0273982820275604	0.104865298406939	0.386724348275229	ENSMUSG00000027014
Ube2e3	-0.0757836820438941	0.428559670016331	-0.00541071814483219	0.979967993351272	ENSMUSG00000027011
Itga4	-0.0654059654780708	0.815327012803411	0.362733857803148	1	ENSMUSG00000027009
Ssfa2	0.573769144749045	1.29534430017784e-15	0.212475930171886	0.0238760239746142	ENSMUSG00000027007
Pde1a	-1.59550244535689	1.97669314041891e-28	-0.304260018724236	0.102552187107208	ENSMUSG00000059173
Dnajc10	0.0537300196577556	0.355837633611928	0.0712192100816894	0.350502701888013	ENSMUSG00000027006
Nckap1	0.288929816772486	4.92003707922962e-16	0.00661038833461338	0.955311778249561	ENSMUSG00000027002
Gm13689	-0.0548839765556127	1	-0.0205657244765789	1	ENSMUSG00000081487
Gm13688	0.0895850827563103	1	0.0569772576243279	1	ENSMUSG00000083284
Dusp19	-0.0277969278944954	0.906254182908176	-0.146314728047365	0.620233062000948	ENSMUSG00000027001
Nup35	0.066986723790535	0.666068012005556	-0.0625752406671981	0.8190048501015	ENSMUSG00000026999
Gm4735	0.10805162732928	0.710347405005412	0.0915492033246898	0.863689735223165	ENSMUSG00000064193
Gm13680	-0.0974346510725617	0.739670932464384	-0.0716416285316377	0.900153923058184	ENSMUSG00000081400
Zc3h15	0.052142447769199	0.386524707229701	-0.0897113639459132	0.200233004707415	ENSMUSG00000027091
Itgav	0.594979365063328	7.34555692444622e-83	-0.109816519129697	0.00604241070984447	ENSMUSG00000027087
Fam171b	0.193270172800705	0.00565225153769402	-0.0873117733739034	0.480248244527418	ENSMUSG00000048388
Calcrl	-0.256316683231186	0.042016394066782	0.411317334819263	0.000993993290259824	ENSMUSG00000059588
Tfpi	-0.31261480524815	1.60649732505947e-10	-0.0504638445885802	0.614676935053066	ENSMUSG00000027082
Ctnnd1	-0.177198203026846	0.0221998615783011	-0.184484044966024	0.0425058256599349	ENSMUSG00000034101
2700094K13Rik	-0.429148046494389	0.000491639515939007	-0.0674679939523989	0.815872644778332	ENSMUSG00000076437
Tmx2	-0.0874335732254092	0.424289781568099	-0.000340845843692558	0.99863023514043	ENSMUSG00000050043
Med19	0.0540760697114328	0.667669648024553	-0.00309353687828916	0.989551755653735	ENSMUSG00000027080
Zdhhc5	0.0153374379016592	0.819209649496521	-0.00298755837929933	0.981302212432999	ENSMUSG00000034075
Clp1	0.268502807343225	0.0895088779134886	-0.046524125396045	0.907340949663697	ENSMUSG00000027079
Ypel4	-0.570617841969609	0.00713674772301805	0.253934035151629	0.486896907435666	ENSMUSG00000034059
Gm19426	-0.465516298347372	0.0312298954209405	0.0784785368138235	0.885238032503355	ENSMUSG00000097187
Serping1	-0.441061194617159	0.0333178203022686	0.329241535717932	0.244641135773168	ENSMUSG00000023224
Ube2l6	-0.592904297393441	0.000442744765905643	0.141732554507564	0.673584473885038	ENSMUSG00000027078
Timm10	0.137431620424101	0.325623875210659	-0.0634972722441509	0.819725685701111	ENSMUSG00000027076
Slc43a1	-0.960935980594889	4.28374427387044e-07	-0.346493234588247	0.221787329673731	ENSMUSG00000027075
Slc43a3	0.0635921143140495	0.636169116393138	-0.136922851833624	0.41149170787421	ENSMUSG00000027074
P2rx3	0.707412664195126	3.49742837963292e-09	-0.472308951082886	0.00221950165414854	ENSMUSG00000027071
Ssrp1	-0.0421741412812056	0.298551842660795	-0.096444937477766	0.0156239600928962	ENSMUSG00000027067
Tnks1bp1	0.0504248748415333	0.289984097484508	0.00191248845915393	0.986486432723337	ENSMUSG00000033955
Aplnr	0.0104537015150282	1	0.0523680647666628	1	ENSMUSG00000044338
Gm13713	-0.0131499396749754	1	0.0986475496375311	1	ENSMUSG00000085135
Gm1826	-0.0837370854355839	1	-0.0856380748253437	1	ENSMUSG00000082028
Gm13736	0.0386563448467636	1	-0.0407320510342637	1	ENSMUSG00000082908
Ptprj	1.10632794718451	2.51489838437569e-38	0.262846938824488	0.025512183601259	ENSMUSG00000025314
Nup160	0.284816950078132	1.63314964098446e-07	-0.0400772480709223	0.758105898926152	ENSMUSG00000051329
Fnbp4	-0.041248348603582	0.660056046497284	0.158560852190317	0.0647807673745031	ENSMUSG00000008200
Rpl30-ps3	-0.0308382531027602	1	0.0648788597621066	1	ENSMUSG00000080873
Agbl2	0.147979994347253	0.5533670200279	-0.024179710925352	1	ENSMUSG00000040812
Gm13772	0.158107558565868	1	0.00337916175485114	1	ENSMUSG00000080977
Mtch2	0.189027255905406	5.05710122981165e-05	-0.0104914394320878	0.940613961251051	ENSMUSG00000027282
Ndufs3	0.0252168759243261	0.859309212930893	-0.0682794320499949	0.72913934512883	ENSMUSG00000005510
Kbtbd4	0.114791186226068	0.416852563048542	0.00192837139354724	0.994411687193565	ENSMUSG00000005505
Ptpmt1	0.200149118786395	0.0997008936402891	-0.00267715918329006	0.992051066469344	ENSMUSG00000063235
Celf1	0.43309611305024	1.26120394872357e-33	-0.0372237928737586	0.643707187947567	ENSMUSG00000005506
Rapsn	0.112789408999968	1	0.0095464251599154	1	ENSMUSG00000002104
Gm13778	0.040617917167293	1	0.00784999374764368	1	ENSMUSG00000086495
Psmc3	0.101773244309358	0.064802438361856	-0.0114719681974501	0.938648610544892	ENSMUSG00000002102
Slc39a13	0.171864857782799	0.00702793951429171	0.0642367706191505	0.596867477657322	ENSMUSG00000002105
Madd	0.695643482661558	3.07141289130369e-11	-0.129539254512947	0.555527891207919	ENSMUSG00000040687
Nr1h3	0.0962005746230323	0.649225844662902	-0.288623983687234	1	ENSMUSG00000002108
Acp2	0.0969928635167851	0.272394269256977	0.106213433120408	0.393818906835404	ENSMUSG00000002103
Ddb2	0.0507827894665782	0.859174732698117	-0.0860515055795613	0.859483781807105	ENSMUSG00000002109
A330069E16Rik	-0.141517607149804	0.514256541806822	0.171954799129273	1	ENSMUSG00000097868
Pacsin3	-0.00451721436940721	0.979182989041899	0.130858747603841	0.47581956103828	ENSMUSG00000027257
Arfgap2	-0.0810173402151547	0.322686670737163	0.108533183264046	0.293757755476874	ENSMUSG00000027255
1110051M20Rik	-0.422259361878529	0.000878516267945894	-0.031830025119884	0.928525955733751	ENSMUSG00000040591
Lrp4	-0.629785110673793	9.08740639770156e-07	0.0790478080199782	0.786895986191867	ENSMUSG00000027253
Ckap5	-0.0437502876895114	0.28186968958935	-0.0191005414074036	0.812734767277725	ENSMUSG00000040549
Zfp408	0.0573465612322132	0.676334740165115	0.0616970045531736	0.791250180074269	ENSMUSG00000075040
Arhgap1	0.127205504037689	0.00868387929290692	-0.0798500250549875	0.265107299264155	ENSMUSG00000027247
Atg13	-0.131502203152715	0.283693172348253	0.0318848835601265	0.911277426910183	ENSMUSG00000027244
Harbi1	-0.0418166779446321	0.886070410739438	-0.0881559927542222	0.847582582168789	ENSMUSG00000027243
Ambra1	-0.173820545228399	0.0406294686397273	-0.0438708444774271	0.811710127872832	ENSMUSG00000040506
Chrm4	-0.111763449929735	1	-0.0975331747847392	1	ENSMUSG00000040495
Mdk	-0.0131983200403733	1	-0.0627048082448673	1	ENSMUSG00000027239
Dgkz	-0.085230705618265	0.352170105193616	-0.136229530565952	0.200502940742693	ENSMUSG00000040479
Creb3l1	-0.374853025199559	1.54913479134618e-05	-0.469334042869127	6.89853030341919e-08	ENSMUSG00000027230
Phf21a	0.000254939394401671	0.998131801998027	-0.068355807803051	0.691707016506758	ENSMUSG00000058318
Gyltl1b	-0.0674109126438	1	-0.125128365253323	1	ENSMUSG00000040434
Pex16	-0.112686257174455	0.638018670323388	0.450639408241947	0.0372190654367426	ENSMUSG00000027222
1700029I15Rik	0.0112751118926944	0.964813230642139	0.0848196038320294	1	ENSMUSG00000044916
Mapk8ip1	0.0773998605525426	0.616590700653027	0.0379757206453206	0.904407785702546	ENSMUSG00000027223
Cry2	0.814707361086845	3.83346317285759e-17	0.0496020891204141	0.86598994509932	ENSMUSG00000068742
Slc35c1	0.346425059370457	0.00440879266362882	-0.15286278553392	0.458513645528435	ENSMUSG00000049922
Chst1	0.208709329940329	0.0767120877812537	0.506556155862079	4.16291320562554e-06	ENSMUSG00000027221
Gm13816	0.20132059650623	0.360911779400788	0.0830323519490297	1	ENSMUSG00000085976
Syt13	0.680174111674524	0.000250107722499046	0.26561036378581	1	ENSMUSG00000027220
Prdm11	0.739215333552877	3.27638231110452e-05	-0.210999068938439	0.54135729541448	ENSMUSG00000075028
Trp53i11	-0.181831014081302	0.486553455850478	-0.0476197723201199	0.936734670810366	ENSMUSG00000068735
Tspan18	-0.252456236318299	0.286768927668189	-0.160921697935778	0.705105632014805	ENSMUSG00000027217
Cd82	0.33928451122939	8.51472768037387e-05	0.356013744159918	0.000116685133266951	ENSMUSG00000027215
Ext2	-0.159446125172419	0.0104579214362083	-0.0443471262244013	0.728589340966351	ENSMUSG00000027198
Accs	-0.0854013015835502	0.742329811451813	0.182029248339055	0.599815164487686	ENSMUSG00000040272
Gm13889	-0.107763731199918	1	-0.114011677919691	1	ENSMUSG00000087006
Alkbh3	-0.0766161921694822	0.648048724325615	0.015664910974348	0.965270093933462	ENSMUSG00000040174
Hsd17b12	0.156749282889207	0.000998173479738527	-0.0115952786754922	0.932317920051455	ENSMUSG00000027195
Ttc17	0.171638874069248	0.0375519875771399	0.0535395054263266	0.757703062062945	ENSMUSG00000027194
Itpa-ps1	-0.040845614935545	0.883413765431972	-0.176919701281076	1	ENSMUSG00000081476
2810002D19Rik	0.0935343079314103	0.671365452035977	-0.0356009994054578	0.940445954498487	ENSMUSG00000045464
Api5	0.0468347168708809	0.36919279354908	0.0175322873014582	0.874423769788778	ENSMUSG00000027193
Lrrc4c	-0.392487561657502	0.0778778403733006	0.628223347905487	0.00569924790242354	ENSMUSG00000050587
Gm13803	0.242773333129733	0.222713529440467	-0.0240388541806678	1	ENSMUSG00000082820
B230118H07Rik	-0.258400575147003	0.156491209667653	-0.0984104927061763	0.791481490881622	ENSMUSG00000027165
Traf6	0.344459495461188	0.000474262104916852	0.0543486745398805	0.822232444021261	ENSMUSG00000027164
Prr5l	-0.0868805430180238	0.731806039340172	-0.0893667654020634	0.834028581436741	ENSMUSG00000032841
Commd9	-0.223913614011043	0.0835442845194807	-0.00186562777365287	0.994518871839968	ENSMUSG00000027163
Ldlrad3	0.416210924048045	1.70555690773739e-07	-0.115858625063562	0.440525192610094	ENSMUSG00000048058
Trim44	0.0765461922749883	0.154087224204473	0.0220270291400035	0.853981149009587	ENSMUSG00000027189
Gm13868	-0.0893386542551076	1	0.0796745458816003	1	ENSMUSG00000083306
Fjx1	-0.114403072173856	0.567264319756544	-0.332746065759911	0.0806368208131436	ENSMUSG00000075012
Pamr1	0.950287155925767	7.62676192651942e-09	0.0698932822915879	0.879756646507377	ENSMUSG00000027188
Slc1a2	0.296380937346202	0.214607183046171	0.00110429277491376	0.998158038771362	ENSMUSG00000005089
Cd44	0.000442748973045718	0.992587168441573	0.292510141909097	1.83079047642334e-28	ENSMUSG00000005087
Pdhx	0.236559816737162	0.0335819517083093	-0.0230902803199351	0.941101230742032	ENSMUSG00000010914
Apip	-0.0956755068049094	0.566186855153794	0.0352577635238855	0.921240556049121	ENSMUSG00000010911
Cat	0.428097638443099	3.99925281958065e-09	-0.0886931735084303	0.55256201076852	ENSMUSG00000027187
Abtb2	0.343866047454684	0.00112891767765994	-0.0088793452032794	0.976636344340732	ENSMUSG00000032724
Nat10	-0.0652890170810241	0.434897587414662	-0.243551656099973	0.00075426412669365	ENSMUSG00000027185
Caprin1	0.0354748072178162	0.272637526515514	-0.0944770117952057	0.00171605105541069	ENSMUSG00000027184
Fbxo3	-0.0989586361075905	0.213371897425026	0.17218704790621	0.0385769703741525	ENSMUSG00000027180
Gm24644	-0.0546943427531407	1	0.0331046413770985	1	ENSMUSG00000087739
Cd59b	-0.158071674079645	0.435038175931297	-0.0348387270796432	1	ENSMUSG00000068686
Cd59a	-0.356831365538085	0.119291180952036	-0.214832387778054	0.583816627798059	ENSMUSG00000032679
Gm13882	0.0233358852452699	0.935220265534271	-0.0648228553134304	1	ENSMUSG00000081721
Hipk3	0.616144082382376	9.91126654442485e-44	0.0607382785160917	0.504730978916151	ENSMUSG00000027177
Cstf3	0.0269265063948419	0.821589263421363	-0.107267960297453	0.435492220286566	ENSMUSG00000027176
Tcp11l1	-0.406941927096726	0.0413886408922361	-0.0251535264952753	0.963569681832138	ENSMUSG00000027175
Depdc7	-0.159326562184607	0.52351591331243	-0.0202240653591221	1	ENSMUSG00000027173
Qser1	0.1859412394009	0.000703056406486587	-0.0814472667234044	0.365782677337513	ENSMUSG00000074994
Gm13886	0.038476718527473	1	-0.0349366943805812	1	ENSMUSG00000083856
Prrg4	0.691528481527142	3.77139333645451e-05	-0.0159672153353314	0.97471903456892	ENSMUSG00000027171
Ccdc73	-0.130384932886233	0.515649539841122	-0.00793631942154855	1	ENSMUSG00000045106
Eif3m	-0.0111856295085613	0.898741460825886	-0.114093582540923	0.114482430699344	ENSMUSG00000027170
Rcn1	-0.317314688364901	9.59040739966847e-14	-0.0352164855207826	0.716334591443707	ENSMUSG00000005973
Elp4	-0.223127268000602	0.110568992695334	-0.0662245187649662	0.824053239905702	ENSMUSG00000027167
Immp1l	-0.318424495636232	0.0158267884882793	-0.0413689170359221	0.904902356723338	ENSMUSG00000042670
Dnajc24	0.223813828418918	0.201349581297856	0.0515134274250753	0.903144369575794	ENSMUSG00000027166
BB218582	-0.10571522319719	0.581344335460105	0.18227574540809	1	ENSMUSG00000085218
Mpped2	-0.0395234537465938	0.897039570476114	1.53028174766327	5.73139968089763e-19	ENSMUSG00000016386
Arl14ep	0.160825781803935	0.0176650238972709	-0.131070729147421	0.155234808497899	ENSMUSG00000027122
Kcna4	-0.530575291929472	0.00418821732258337	0.22192633920049	0.459790719013087	ENSMUSG00000042604
Rpl35a-ps4	0.0832369347469697	1	-0.0485307407515175	1	ENSMUSG00000083424
Gm13910	-0.0102518019348664	0.969235215223637	0.040293390907381	1	ENSMUSG00000063684
Mettl15	-0.377920554679839	0.0455525398111223	-0.114855002301651	0.768782301421962	ENSMUSG00000057234
Kif18a	-0.290867376953457	0.000353628403748834	0.0648316174449366	0.706592173483446	ENSMUSG00000027115
Bdnf	-0.236129010753542	0.000418606414638514	-0.101571798475481	0.330992731127046	ENSMUSG00000048482
Lin7c	0.481614615130252	3.47162950651528e-25	0.120179515274178	0.0715085731606235	ENSMUSG00000027162
Lgr4	0.341570404208291	2.92353131357014e-08	0.204738602862477	0.00846004454634536	ENSMUSG00000050199
Ccdc34	-0.203703777137227	0.0474338177756395	0.00264679053251675	0.990849863091428	ENSMUSG00000027160
Fibin	-0.357203690249686	0.0495947716258011	-0.249701102999041	0.364932289116483	ENSMUSG00000074971
Lpcat4	0.0122884008091925	0.943290074063377	-0.0918402204853258	0.667722783400759	ENSMUSG00000027134
Nop10	-0.167931235852961	0.0963232916727331	0.0987105536706456	0.546351900412389	ENSMUSG00000027133
Slc12a6	0.418891726418052	2.27230327116196e-05	0.0724304788393762	0.75522355458809	ENSMUSG00000027130
Emc4	0.195893680394346	0.0179219892986042	0.0633192700957106	0.710437772804797	ENSMUSG00000027131
Katnbl1	0.321166296721063	0.000289089653656262	0.0151649465941426	0.9575464550696	ENSMUSG00000027132
Emc7	0.251975168141009	0.0015900568466673	0.0845093883337605	0.585123693433245	ENSMUSG00000055943
Aven	0.232162388990371	0.052915266703317	-0.112185751560581	0.613322264666472	ENSMUSG00000003604
Fmn1	0.202447476614252	0.00790660152735877	-0.124513464465827	0.283920413363534	ENSMUSG00000044042
Gm13966	0.0607107565182177	1	-0.0190134714121619	1	ENSMUSG00000087545
Grem1	-0.391096357132101	2.15805637984963e-45	0.228332792738835	5.21383190295279e-16	ENSMUSG00000074934
Scg5	0.0137156023625993	0.961359387233746	0.13246138941	1	ENSMUSG00000023236
Arhgap11a	-0.0459635598901693	0.523606514175102	0.0702201727086404	0.468662812653172	ENSMUSG00000041219
Gm21596	-0.0612825197989319	0.819755037418078	0.0483075486826082	0.922740973938081	ENSMUSG00000096006
Aqr	0.0543966096792634	0.409026762523658	-0.100258167202355	0.17754907137729	ENSMUSG00000040383
Zfp770	-0.104179630378222	0.395732694922865	-0.0913886551422082	0.644415551510074	ENSMUSG00000040321
Dph6	0.286069565691482	0.0018892827623658	-0.00415277642690251	0.987191141410747	ENSMUSG00000057147
BC052040	0.750215064497214	1.29390217633544e-08	-0.131937297724222	0.65512773258979	ENSMUSG00000040282
Meis2	0.0152084411796304	0.921930199112019	0.0537765914368502	0.818209880353341	ENSMUSG00000027210
2700033N17Rik	0.30833196663888	0.106148899898748	0.0641693209738836	1	ENSMUSG00000086328
G630016G05Rik	-0.173734313740894	0.419192003720197	-0.0376972957657786	1	ENSMUSG00000086308
Gm13991	0.0805298348785083	0.724249401936013	-0.0260493965116837	1	ENSMUSG00000081787
D330050G23Rik	-0.0562569321411606	0.80676989833522	-0.00377537531504962	1	ENSMUSG00000085316
Gm29340	-0.288284676931135	1	0.104081963876519	1	ENSMUSG00000099470
Spred1	0.0174686841021987	0.833658672900416	0.222244068829805	0.000136065003510361	ENSMUSG00000027351
Fam98b	-0.0143095703481151	0.905677793834942	-0.0899021903579601	0.50595784207333	ENSMUSG00000027349
Gm13986	-0.0415791621627249	0.889494337037147	-0.16854408237363	1	ENSMUSG00000087203
Thbs1	-0.891703486479705	4.04491317068844e-292	-0.397578428289697	9.11287243796919e-59	ENSMUSG00000040152
Fsip1	-0.0852211484062537	0.704379175188278	0.0205049754128227	1	ENSMUSG00000027344
A930104D05Rik	-0.0113847952149425	1	0.0704824364364735	1	ENSMUSG00000045339
Gpr176	0.309545395675261	1.51062567157318e-08	-0.403061652577698	8.24518677443382e-12	ENSMUSG00000040133
Eif2ak4	0.0803357717600079	0.398422577182292	-0.0948091043174964	0.498452797374447	ENSMUSG00000005102
Srp14	0.0574322405653829	0.572582826397126	0.107954711180146	0.405027540771231	ENSMUSG00000009549
Bmf	0.479988940790434	0.0193123310717192	-0.0561872323225402	0.920742114672997	ENSMUSG00000040093
Bub1b	-0.16583435591459	0.00121274038657333	-0.0261053759651229	0.8323853772228	ENSMUSG00000040084
Pak6	-0.195002410452364	0.421454720339719	-0.0171160486605785	0.975405735116381	ENSMUSG00000074923
Inafm2	0.258811993094019	0.0210028518393621	-0.00546044714901279	0.985828289268003	ENSMUSG00000074918
A430105I19Rik	0.163699131662709	0.0427974075024133	0.0522291521864461	0.765462938879315	ENSMUSG00000045838
Disp2	0.0796199828768397	1	-0.0345107113389808	1	ENSMUSG00000040035
Knstrn	-0.227824114918699	0.000852608635085562	0.0848045636206072	0.464910709527499	ENSMUSG00000027331
Ivd	-0.0181334718197862	0.911367091689567	-0.0553809141382878	0.820638887636459	ENSMUSG00000027332
Bahd1	0.114789105194659	0.291905242586221	-0.0684324521818307	0.729423455023914	ENSMUSG00000040007
Chst14	0.146910244067513	0.231834601787082	-0.0592257406329498	0.814259306244627	ENSMUSG00000074916
Ccdc32	-0.158867496782678	0.347774492130587	0.114939862764196	0.695783700443606	ENSMUSG00000039983
Rpusd2	0.00113039810650853	0.996412700408444	-0.145574106334123	0.672286373269692	ENSMUSG00000027324
Casc5	-0.0129653322917188	0.903584021114692	-0.0137762081300398	0.944860654379165	ENSMUSG00000027326
Rad51	0.0342359350783992	0.740542989699519	-0.109833216643675	0.347317070549476	ENSMUSG00000027323
Rmdn3	0.144107744579554	0.247802226818632	-0.0560158138503503	0.829576772678804	ENSMUSG00000070730
Gchfr	0.705414868501926	2.03925165515037e-05	0.560788548757786	0.00263996303307416	ENSMUSG00000046814
Dnajc17	-0.27387659717582	0.156296784348771	-0.0917018267832708	0.824053239905702	ENSMUSG00000034278
Gm14137	0.802839826413554	6.0983119144922e-05	0.197374398097993	0.628695239769949	ENSMUSG00000055926
Zfyve19	-0.100753559586314	0.547448765287295	-0.0778259231427988	0.79502430851402	ENSMUSG00000068580
Spint1	0.0602042777820747	1	-0.0412646467611703	1	ENSMUSG00000027315
Vps18	-0.0601708112206425	0.604915592140451	0.0672504486137551	0.712453036474589	ENSMUSG00000034216
Chac1	0.584304618333081	1.83668799395056e-11	-0.735368922078811	1.68715846382109e-14	ENSMUSG00000027313
Ino80	0.05332256477857	0.519948327420219	-0.000159692377637867	0.998844426633303	ENSMUSG00000034154
Exd1	0.00614759588543121	0.981991132759564	0.0994824778257075	1	ENSMUSG00000048647
Chp1	-0.000981820931044477	0.990903363184736	0.200925277741532	0.000201750027039772	ENSMUSG00000014077
1700020I14Rik	1.14484321052798	8.58969122629582e-127	0.104611541941908	0.197189581578968	ENSMUSG00000085438
Oip5	0.337690815165895	0.0176459976044242	0.0725322319141494	0.831987430661435	ENSMUSG00000072980
Nusap1	0.101080162746796	0.150594187241105	0.0813436570332217	0.450695440587286	ENSMUSG00000027306
Ndufaf1	-0.0616896585941504	0.761633480184674	0.121589434935063	0.674744162982358	ENSMUSG00000027305
H3f3c	0.0570129003665718	1	-0.0580456559520854	1	ENSMUSG00000082029
Rtf1	0.0672596982571382	0.389954388012937	0.0810227237973885	0.462135433671971	ENSMUSG00000027304
Rpap1	0.317184057288761	0.000105129149761381	-0.0331733480657701	0.884205509480554	ENSMUSG00000034032
Tyro3	0.464326164498312	8.97365555569061e-08	0.0871577238082031	0.639046980848596	ENSMUSG00000027298
Mga	0.017754178600022	0.786554583362357	-0.0307161013053216	0.755194362852126	ENSMUSG00000033943
Mapkbp1	-0.192620852411564	0.0997624560917331	0.257559022816143	0.0429411487599539	ENSMUSG00000033902
Jmjd7	0.195493587732986	0.321884844916196	0.0138747337381772	1	ENSMUSG00000098789
Pla2g4b	0.0302283419944469	0.913054410581854	0.0230824291376045	1	ENSMUSG00000098488
Sptbn5	-0.106591745491421	1	0.0976668003544567	1	ENSMUSG00000074899
Ehd4	0.802416917605244	1.8268812758256e-30	-0.074114304121902	0.645139165456095	ENSMUSG00000027293
Vps39	0.106983748462779	0.339398190894431	0.0478761220438253	0.835834398440348	ENSMUSG00000027291
Tmem87a	0.0790528606144675	0.45870837261289	0.0387893906373073	0.860067349302458	ENSMUSG00000033808
Ganc	-0.309767244380372	0.145646835048788	0.0432780045870355	0.93684625610398	ENSMUSG00000062646
Zfp106	0.076316482460031	0.0411849646800813	-0.0584920227659758	0.263485408788891	ENSMUSG00000027288
Gm26899	0.269059902017313	0.127360823267775	0.265827180135413	1	ENSMUSG00000097799
Snap23	0.438207508895353	8.8639553873559e-12	0.0387307734574547	0.821363598148337	ENSMUSG00000027287
Lrrc57	0.166854051173707	0.398735841164019	0.088623627924208	0.81462747029146	ENSMUSG00000027286
Haus2	-0.0342041561971004	0.829920287101141	0.0626077746281764	0.79897144792251	ENSMUSG00000027285
Stard9	0.363369207928948	5.59876814978196e-07	0.214015580693828	0.0216301802493043	ENSMUSG00000033705
Cdan1	0.00307293811298742	0.986576421509605	0.058581757945584	0.817323153909999	ENSMUSG00000027284
Ttbk2	0.0562601715824584	0.690949937054315	0.0805269616881035	0.719940997964702	ENSMUSG00000090100
AV039307	-0.0334615399517035	0.89194518449563	-0.0511372223641715	1	ENSMUSG00000087519
Ubr1	0.230702487407605	0.00353673547387255	0.186378625388462	0.0655372037681614	ENSMUSG00000027272
Tmem62	0.848092954455364	2.80470329896871e-10	0.110072670445146	0.725923775967181	ENSMUSG00000054484
Ccndbp1	0.065406016170341	0.674134675966356	0.226855425125474	0.133980235972592	ENSMUSG00000023572
Tgm5	-0.0840313329821816	1	-0.0265705572511228	1	ENSMUSG00000053675
Lcmt2	-0.342776316265326	0.057279130349493	-0.0913807676348411	0.814259306244627	ENSMUSG00000074890
Adal	-0.26323946217298	0.114395830498425	-0.065689386036117	0.862268468110348	ENSMUSG00000027259
Zscan29	0.0258159376117646	0.895191413071946	0.198949513133875	0.270474464959261	ENSMUSG00000050619
Tubgcp4	0.2663445991708	0.00025934574477388	-0.0116532080476858	0.958486208645108	ENSMUSG00000027263
Trp53bp1	-0.0681280404839976	0.468986024838697	0.0766043533444654	0.585961657421781	ENSMUSG00000043909
Map1a	-0.173811444171655	0.0127589842204057	0.451729717266431	3.06918384972551e-13	ENSMUSG00000027254
Ppip5k1	0.0695265632520375	0.727470422052829	0.124757729132613	0.656765750967689	ENSMUSG00000033526
Catsper2	-0.0356992421899864	0.912581541955387	-0.0370907614867778	0.952157291431595	ENSMUSG00000033486
Pdia3	0.0551242908004285	0.0510485892074453	-0.0547737398933726	0.12389994797866	ENSMUSG00000027248
Serf2	-0.0161675607756466	0.807036419891556	0.0363566030266986	0.700591198895263	ENSMUSG00000074884
Gm22953	0.132493562671184	1	0.236768090079654	1	ENSMUSG00000080374
Hypk	0.277056714358558	0.204310731053433	-0.0113852142795945	0.983422785280491	ENSMUSG00000027245
Mfap1b	0.121149152420614	0.460964186861471	-0.0863195931601505	0.766816981388894	ENSMUSG00000048222
Gm14017	0.0606629908806	1	0.0200985869604457	1	ENSMUSG00000081967
Mfap1a	0.0898129251833994	0.515306084061674	-0.0473628718864228	0.86598994509932	ENSMUSG00000068479
Wdr76	-0.108715071843721	0.467481212924781	-0.111579956078957	0.632587292461515	ENSMUSG00000027242
Frmd5	-0.17084379299686	0.438087126884753	0.128340761750431	1	ENSMUSG00000027238
Casc4	0.0778855853790065	0.389271985636647	-0.072582852744655	0.618775088649577	ENSMUSG00000060227
Mageb3	-0.0101773869495474	1	-0.0346907977951252	1	ENSMUSG00000074881
Ctdspl2	0.0683955654007719	0.479384734557242	0.0134744232703483	0.953956283078005	ENSMUSG00000033411
Eif3j1	0.195988208022335	0.00180100524594755	-0.120884452583265	0.171839126656766	ENSMUSG00000027236
Spg11	0.232004173492189	0.000241328537438602	-0.130124282183759	0.147719410467887	ENSMUSG00000033396
B2m	0.227021489026564	1.03647816223236e-12	0.125011956369802	0.00075426412669365	ENSMUSG00000060802
Trim69	0.381080803895918	0.063560569793916	-0.170568409924084	1	ENSMUSG00000033368
Rps12-ps10	-0.0597855565356932	0.825068055041209	-0.094251480852892	1	ENSMUSG00000070692
Sord	-0.850662302733589	1.76625098897395e-11	-0.0229526321019731	0.953146858270658	ENSMUSG00000027227
Duox2	-0.0281986359156249	1	0.00892080404652912	1	ENSMUSG00000068452
Duoxa1	0.44853714409449	0.0426144969561719	0.0891429340562079	0.866948259665145	ENSMUSG00000027224
Duox1	0.361969991578746	0.113662264411533	0.109026892655201	0.824372191597187	ENSMUSG00000033268
Shf	0.10628128982294	0.645489080608854	0.696832022029592	4.66419399072717e-05	ENSMUSG00000033256
Bambi-ps1	-0.0379513477972752	1	-0.110452321626866	1	ENSMUSG00000081219
Gatm	0.0646546231013453	1	0.00748044141238063	1	ENSMUSG00000027199
Spata5l1	-0.132352958118877	0.615469511524698	-0.26934440280045	0.40201647246293	ENSMUSG00000074876
AA467197	0.328987813639881	0.0435623171828771	-0.101317036833766	1	ENSMUSG00000033213
Slc30a4	0.542315453288882	2.39192060864707e-56	0.0350590180468171	0.66098371578123	ENSMUSG00000005802
4930417H01Rik	0.181868962645408	1	0.0152246620229841	1	ENSMUSG00000087017
Bloc1s6	0.382253150425665	9.92818002764473e-05	-0.0361521505043176	0.898909220229837	ENSMUSG00000005804
Sqrdl	0.0490805901578615	0.70779002694415	0.293000946860081	0.00470508042693964	ENSMUSG00000005803
Sema6d	-0.00991040568540243	0.976355012198239	0.141318745484726	0.748920140880788	ENSMUSG00000027200
Myef2	0.274515725315675	3.91078946880134e-07	0.107902615718968	0.180164615570948	ENSMUSG00000027201
Slc12a1	-0.0725124041733544	0.751788866014043	0.0428218900991021	1	ENSMUSG00000027202
Gm14002	0.0509075224526941	0.874846571974034	0.0290843344117681	0.963372534056654	ENSMUSG00000086416
Dut	0.0471390870236692	0.632762559660135	0.0487732845459929	0.762234116655581	ENSMUSG00000027203
Fbn1	0.563245117134709	8.1135380812256e-91	0.128351603421113	9.3233114822252e-05	ENSMUSG00000027204
Gm9913	0.0393284639352827	0.880813897691797	-0.0665380375111828	1	ENSMUSG00000053615
Cep152	-0.138753941355144	0.264384160732261	-0.0224445170560975	0.941101230742032	ENSMUSG00000068394
Shc4	-0.396840066916089	0.058626070282249	-0.261240347678014	0.427326603587878	ENSMUSG00000035109
Eid1	-0.398869407831474	3.5379741106692e-14	0.103731668003675	0.180735051503749	ENSMUSG00000091337
Secisbp2l	0.173612542066633	0.00260669717801728	0.0517653660041936	0.664109188828068	ENSMUSG00000035093
Cops2	0.0578297084187347	0.316117343924821	0.0388805173243505	0.703661868209614	ENSMUSG00000027206
Galk2	-0.160039294191849	0.0885361634971038	0.157592536861619	0.191053920021672	ENSMUSG00000027207
Fgf7	-0.0414422042824691	0.418127873024041	0.158307001773451	0.000348346621529256	ENSMUSG00000027208
Dtwd1	0.259485843099634	0.0173876108565469	-0.028873440865002	0.923111140056777	ENSMUSG00000023330
Atp8b4	-0.232162316938743	0.227970334029834	-0.0814282236294767	0.841476202858563	ENSMUSG00000060131
Hdc	0.00290919475424182	1	0.0132812186762547	1	ENSMUSG00000027360
Gabpb1	-0.104969883236005	0.354274771712567	-0.0222367516026185	0.932944152594275	ENSMUSG00000027361
Gm27003	0.0514225504127514	0.818512969792961	-0.0566953763693646	1	ENSMUSG00000098024
Usp8	0.0602386589579567	0.385888322695764	0.0427569794216071	0.727198834847783	ENSMUSG00000027363
Usp50	-0.0166771800521499	1	-0.0666840532783756	1	ENSMUSG00000027364
Trpm7	0.0958948742808735	0.0505764700949333	0.013788925551018	0.913776163526293	ENSMUSG00000027365
Sppl2a	0.258755229565028	8.05195118706154e-07	0.182769199080233	0.0033113992380053	ENSMUSG00000027366
Ap4e1	0.57458098817387	2.01112116193073e-09	-0.073306019006568	0.759962485805593	ENSMUSG00000001998
Gm24081	0.00938746089018664	1	0.0307247175695405	1	ENSMUSG00000092918
Blvra	0.0977866896305062	0.533166149427536	0.227141605564611	0.186807032551929	ENSMUSG00000001999
Ncaph	-0.00637762127500523	0.9569429188845	-0.0039836263000515	0.984712526550766	ENSMUSG00000034906
Itpripl1	-0.17747356266602	0.193781453947629	-0.2400857180833	0.128472180440511	ENSMUSG00000074825
1810024B03Rik	-0.0736984384310456	0.812107327450347	0.3386905959817	0.278664409138719	ENSMUSG00000044145
Snrnp200	0.168524434056501	5.58556371439208e-07	-0.0488547060188355	0.409259540382726	ENSMUSG00000003660
Ciao1	0.109034916369296	0.327641182982763	2.2020480302344e-05	0.999793557829102	ENSMUSG00000003662
Tmem127	0.0974301973155057	0.185744595150096	0.0419081254839997	0.774872356059359	ENSMUSG00000034850
Stard7	-0.10727744894222	0.167937367045113	-0.0639930212318984	0.637205697683573	ENSMUSG00000027367
Dusp2	0.130185996814368	1	-0.0191514573798573	1	ENSMUSG00000027368
Fahd2a	-0.204914927558412	0.424697717762899	-0.211271549306382	0.593193291161804	ENSMUSG00000027371
Kcnip3	-0.375070437016161	0.0429671025996584	0.000759514998281304	1	ENSMUSG00000079056
Zfp661	-0.296132834723777	0.19550623213673	-0.223290408007095	0.541192222081641	ENSMUSG00000034800
Mrps5	0.062971714870635	0.570518828416811	-0.0764506849871856	0.651349709770076	ENSMUSG00000027374
Nphp1	-0.210802626181283	0.111293182264215	0.0371136257918614	0.910687264503304	ENSMUSG00000027378
1500011K16Rik	-0.352892650167812	0.106173534786643	-0.0595174374728553	0.913187915759482	ENSMUSG00000051319
Bub1	0.133652283026963	0.0334148350331531	-0.0415873461140482	0.75522355458809	ENSMUSG00000027379
Bcl2l11	0.210559797344042	0.107206802832539	0.173579705415062	0.35968178191417	ENSMUSG00000027381
Gm14005	-0.183777209656168	0.243030130345571	-0.02998444741988	0.938758540328248	ENSMUSG00000074813
Gm14012	-0.0138313919106364	1	0.00417688214189026	1	ENSMUSG00000086879
Anapc1	0.113511501260923	0.00312307466280861	-0.100488789064198	0.0291854175087388	ENSMUSG00000014355
Mertk	-0.347479756257656	0.121738379818268	-0.293019297603689	0.361521583088935	ENSMUSG00000014361
Tmem87b	0.429051925649113	3.47082384985619e-06	0.120183767708849	0.50145663329539	ENSMUSG00000014353
Fbln7	-0.070779422067765	0.784940130633748	0.0416009599714122	1	ENSMUSG00000027386
Zc3h8	0.0685177347358582	0.771482197373548	-0.250877234261721	0.327800096474694	ENSMUSG00000027387
Gm10762	-0.266940760811301	0.264606701545694	-0.0263590567269619	0.964715468114496	ENSMUSG00000074807
Zc3h6	0.105386374968277	0.705749640227311	0.140100305785958	0.751574637511674	ENSMUSG00000042851
Gm14027	0.0125942100718036	1	0.03007957358552	1	ENSMUSG00000090248
Gm14025	0.06072046215559	1	-0.0196099855257747	1	ENSMUSG00000079051
Gm14022	-0.00788252403938603	1	0.008633462550151	1	ENSMUSG00000087151
Ttl	-0.1070041016567	0.275769120391625	-0.0706271783612724	0.680280134850842	ENSMUSG00000027394
Polr1b	-0.0931230696070546	0.292707493571799	-0.167899217961029	0.07600155668247	ENSMUSG00000027395
Chchd5	-0.163700607951907	0.387029485984482	0.0692116355293198	0.858456275926744	ENSMUSG00000037938
Gm14026	0.014870785796577	0.953743273642129	-0.000994868214380503	1	ENSMUSG00000082274
Gm4430	0.0740906570024197	0.746971830054169	0.0425530862926917	1	ENSMUSG00000103532
Gm4430	0.0522968061768528	0.856440539968584	-0.329609692347545	0.238600387392401	ENSMUSG00000103009
Slc20a1	0.727181560521715	2.39473968482856e-73	-0.0286630840226534	0.787500098105567	ENSMUSG00000027397
Ckap2l	-0.140583190097716	0.0151103992327584	0.00610891448779724	0.969594731783362	ENSMUSG00000048327
Gm14023	0.109905496279491	1	0.101583129758434	1	ENSMUSG00000085498
Spcs2-ps	0.0128948318388767	1	-0.0455647610459333	1	ENSMUSG00000081888
Sirpa	0.106832355332606	0.306233527660828	0.331510140018076	0.000304646524808269	ENSMUSG00000037902
Gm14046	0.115442403368368	1	-0.00882735713732689	1	ENSMUSG00000084328
Stk35	0.0671806997545301	0.511805049500383	-0.00728997853497388	0.97471903456892	ENSMUSG00000037885
Snrpb	0.0528450197129217	0.302877934800293	-0.00341098625297579	0.977589231727629	ENSMUSG00000027404
Nop56	-0.207760864054294	2.12919216398754e-07	-0.068850559651453	0.269083738668255	ENSMUSG00000027405
Idh3b	-0.00536169061043485	0.954166803589907	-0.0457814044502769	0.700417640183743	ENSMUSG00000027406
Ebf4	-0.14167885509	0.582226945999606	0.147326849650426	0.730186720782347	ENSMUSG00000053552
Gm14044	-0.153193474018109	0.395356965871221	0.0622729851011588	1	ENSMUSG00000083483
Cpxm1	-0.620544083243229	0.000155700934767659	-0.0240378714669978	0.960606266791059	ENSMUSG00000027408
Pced1a	-0.194552801417906	0.102981741677354	0.0456612625144516	0.86598994509932	ENSMUSG00000037773
Vps16	0.00831531137749604	0.94934741426332	-0.0497439449302146	0.78194936425872	ENSMUSG00000027411
Ptpra	0.115508067918424	0.0334929897884126	0.0490548543815604	0.630770110111894	ENSMUSG00000027303
Mrps26	-0.231662525470931	0.0551854956662823	-0.179970792820828	0.267682801884603	ENSMUSG00000037740
Ubox5	-0.0416100344597156	0.843977181606344	0.169011166060004	0.489490570523707	ENSMUSG00000027300
Fastkd5	-0.0291781355245614	0.907451582807833	0.0967684605361457	0.787803829413477	ENSMUSG00000079043
Lzts3	0.123198960334618	0.451810726415235	0.106463612626364	0.698101875504265	ENSMUSG00000037703
Ddrgk1	0.158072399417682	0.125104707358274	0.0251198702006116	0.922596970107754	ENSMUSG00000068290
Itpa	-0.176232676169582	0.0507366333564873	0.0389057243682071	0.84980437517469	ENSMUSG00000074797
Slc4a11	-0.00406437588241863	0.989985626005947	0.00578074414390813	0.990617779119755	ENSMUSG00000074796
4930402H24Rik	0.246242548430972	8.99999679183926e-05	-0.254046619636883	0.000340228850630041	ENSMUSG00000027309
Gm14057	0.0927083028014825	0.73023439676303	-0.117129473218405	0.787803829413477	ENSMUSG00000089662
A730017L22Rik	-0.106629123380023	0.604280413712168	-0.0368798253303315	0.933705455068588	ENSMUSG00000085566
Gm14048	-0.191651700106405	0.299886814513333	-0.143033954626746	1	ENSMUSG00000080989
Atrn	0.189688229808668	0.000261335640133875	-0.180255398750294	0.00217371009068827	ENSMUSG00000027312
Gfra4	-0.104402198042629	0.66917111214498	0.103467550888385	1	ENSMUSG00000027316
Adam33	0.292821862953803	0.218159857047293	-0.165613295707527	0.702589769409986	ENSMUSG00000027318
Hspa12b	-0.490061893307534	0.00683518337287356	-0.116481732362747	0.757871615919712	ENSMUSG00000074793
1700037H04Rik	0.0729849607759831	0.557913313123044	0.0452765214216344	0.844645290011276	ENSMUSG00000027327
Gm14232	0.107846235909378	1	0.00296434658407151	1	ENSMUSG00000087405
Spef1	-0.0754948577531684	0.792704653618029	0.093786595350994	0.843532590121711	ENSMUSG00000027329
Cenpb	-0.226374443432479	1.19278338671629e-06	0.122760954188376	0.0300267990628219	ENSMUSG00000068267
Cdc25b	0.387310662281646	3.11458041067905e-09	0.308823328444554	1.62851699371599e-05	ENSMUSG00000027330
Ap5s1	-0.0942090091884323	0.695541536864922	0.167285156185892	0.620855688885383	ENSMUSG00000068264
Mavs	0.068601366672577	0.523606514175102	0.0511851070096024	0.788385879090505	ENSMUSG00000037523
Pank2	-0.064001612583012	0.551384701569602	0.013535686665231	0.95770398518448	ENSMUSG00000037514
Rnf24	-0.245954992023299	6.09315044932376e-05	-0.0129059767696019	0.942250584531726	ENSMUSG00000048911
Snrpert	-0.0848230800492012	0.71575459407766	0.0305012477325357	0.949857020975343	ENSMUSG00000082044
Smox	0.0626430795031436	0.775389782416453	0.0389512757160928	0.92553051670906	ENSMUSG00000027333
Adra1d	-0.599690442538006	0.000114484265352794	-0.373831086418741	0.0536016628734294	ENSMUSG00000027335
Prnp	-0.0313532884799453	0.66925439955037	0.0858032207127994	0.288841844710509	ENSMUSG00000079037
Rassf2	-0.459916526438764	9.74611065805708e-05	0.63582454602281	1.25552784247964e-08	ENSMUSG00000027339
Slc23a2	0.238319543945507	0.00276349130761192	0.183738981577374	0.0785331185501793	ENSMUSG00000027340
Tmem230	0.293299704705548	0.0448538358760544	-0.166873646903545	0.504699464326695	ENSMUSG00000027341
Pcna	0.0576009919816196	0.298790930589937	0.00510452400584267	0.969594731783362	ENSMUSG00000027342
AV099323	-0.140136187082179	0.538501058562372	0.184456985507726	1	ENSMUSG00000087377
Cds2	0.399590980226033	2.59511111845587e-11	-0.0816432519111653	0.482910281419443	ENSMUSG00000058793
Prokr2	-0.116203212308247	1	0.00637418265301249	1	ENSMUSG00000050558
Gpcpd1	0.665182689546882	7.85568214577302e-10	0.346410717601276	0.0147189381904537	ENSMUSG00000027346
1110034G24Rik	0.151517374081034	0.571116703354063	-0.0355396371386758	0.954231610759256	ENSMUSG00000044991
Trmt6	0.0247623327277283	0.833467350205227	-0.0117159820050542	0.961076979632332	ENSMUSG00000037376
Mcm8	0.177414295451175	0.228199787612721	-0.0533039020628794	0.873212456187392	ENSMUSG00000027353
Crls1	0.103576466541752	0.302736058867232	-0.00840090583597913	0.972614681868424	ENSMUSG00000027357
Hao1	0.161339202021916	0.50816612944225	0.129523167976034	1	ENSMUSG00000027261
Tmx4	0.222547520236086	0.0174093875654947	0.115974559659957	0.454214100943858	ENSMUSG00000034723
Plcb1	-0.234771084270215	0.101516630022989	0.297857703310321	0.07600155668247	ENSMUSG00000051177
Plcb4	-0.151733110317335	0.166330221077755	-0.354310905892997	0.00104432611195309	ENSMUSG00000039943
Ankef1	-0.088207850640799	1	0.150149252086127	1	ENSMUSG00000074771
Mkks	0.130075673361278	0.345357480578007	-0.0961036671915736	0.694721170581568	ENSMUSG00000027274
Slx4ip	0.000456145994769156	0.998074520344113	-0.0463584711003343	0.902468997504119	ENSMUSG00000027281
Jag1	-0.374059568247083	0.00125083639312392	0.0724444238916627	0.774122505886274	ENSMUSG00000027276
Btbd3	-0.0332148326455337	0.818882915580716	0.0952310097523102	0.6055728417527	ENSMUSG00000062098
Ism1	-0.848451919364531	2.31535590184855e-05	0.438723392289684	0.100351006358505	ENSMUSG00000074766
Tasp1	-0.321216926102729	0.012361239298138	-0.107349840226652	0.680280134850842	ENSMUSG00000039033
Rps19-ps7	0.0416848205901149	1	-0.143950917697168	1	ENSMUSG00000080006
Esf1	0.127450577750143	0.0599344680950782	-0.0751804125993681	0.511438994263126	ENSMUSG00000045624
Ndufaf5	-0.255187923472809	0.118917301406079	-0.0773236739163334	0.823089484826815	ENSMUSG00000027384
Macrod2	-0.22990338834864	0.317980564263078	-0.22869226732487	0.499867491125894	ENSMUSG00000068205
Flrt3	-0.768743068416436	6.89173389990084e-08	0.695122676073834	3.90478225801704e-07	ENSMUSG00000051379
Kif16b	0.126162991271399	0.243673417446242	-0.166036964149496	0.2300056569769	ENSMUSG00000038844
Snrpb2	-0.114100372659137	0.194908413292199	-0.00338706269970706	0.987191141410747	ENSMUSG00000008333
Bfsp1	-0.0398256006808667	1	0.0324192395253888	1	ENSMUSG00000027420
Dstn	-0.256276173539097	1.8651874946957e-19	-0.190818827378184	2.00131189168445e-10	ENSMUSG00000015932
Rrbp1	0.0709675162785438	0.0515662862515041	-0.0545332555195601	0.295905164839387	ENSMUSG00000027422
Gm11687	-0.0649994288027124	1	0.104473170782765	1	ENSMUSG00000082480
Snx5	0.0294508375788203	0.608207502317979	-0.105281908524297	0.0522929665795439	ENSMUSG00000027423
Gm11688	0.0701867905368229	1	-0.204954748701585	1	ENSMUSG00000082436
[truncated: 14,706 more rows]
