# Supplementary material for: Inducible and reversible inhibition of miRNA-mediated gene repression in vivo
Source: eLife. 2021 Aug 31;10:e70948. doi: 10.7554/eLife.70948 (PMC8476124; doi:10.7554/eLife.70948)
Supplement: Figure 1—source data 2. [file elife-70948-fig1-data2.csv]

seed	miRNA	z_score	pvalue	fdr	gene_set_size	genotype	experiment	seed_match	mean_miRNA_family_counts
UCCCACA	mmu-miR-188-3p	2.66441261081206	0.00385614509014603	1	168	T6Bwt_dox_vs_no_dox	MEFs	UGUGGGA	56.4166666666667
UCUCCCC	mmu-miR-1894-5p	1.12367484194204	0.130575496489412	1	119	T6Bwt_dox_vs_no_dox	MEFs	GGGGAGA	0.25
AAAGUGC	mmu-miR-106a/mmu-miR-17/mmu-miR-106b/mmu-miR-20a/mmu-miR-93/mmu-miR-20b	13.653327771239	9.64329882953551e-43	6.0559916649483e-40	801	T6Bwt_dox_vs_no_dox	MEFs	GCACUUU	226447.914166667
AAGUGCU	mmu-miR-302a/mmu-miR-291a-3p/mmu-miR-294/mmu-miR-295/mmu-miR-302d/mmu-miR-302b	10.8790034778786	7.25704865689754e-28	4.52839836190406e-25	475	T6Bwt_dox_vs_no_dox	MEFs	AGCACUU	0.5
AAGUUGU	mmu-miR-382	1.14128622780782	0.126875415702246	1	97	T6Bwt_dox_vs_no_dox	MEFs	ACAACUU	4453.54166666667
ACACACC	mmu-miR-329/mmu-miR-362-3p	2.17451576562468	0.0148332113519672	1	165	T6Bwt_dox_vs_no_dox	MEFs	GGUGUGU	4772.5
ACAUUCA	mmu-miR-181a/mmu-miR-181c/mmu-miR-181d/mmu-miR-181b	5.81420956451855	3.04605281006617e-09	1.77280273545851e-06	692	T6Bwt_dox_vs_no_dox	MEFs	UGAAUGU	27230.1666666667
ACCUCUG	mmu-miR-1927	3.13842602570817	0.000849289014546486	0.395768680778663	75	T6Bwt_dox_vs_no_dox	MEFs	CAGAGGU	5.25
AGUGCUG	mmu-miR-1186	5.92078029858142	1.60208837230487e-09	9.38823786170653e-07	192	T6Bwt_dox_vs_no_dox	MEFs	CAGCACU	0.5
AUACAUA	mmu-miR-297b-3p/mmu-miR-467g/mmu-miR-466a-3p/mmu-miR-466d-3p	1.70966185005105	0.0436642106157116	1	570	T6Bwt_dox_vs_no_dox	MEFs	UAUGUAU	379.299166666667
CCCCUGG	mmu-miR-331-3p	1.23397407460135	0.108606282489228	1	96	T6Bwt_dox_vs_no_dox	MEFs	CCAGGGG	2866
CUCCACC	mmu-miR-1952	0.419641921443819	0.337373529411542	1	100	T6Bwt_dox_vs_no_dox	MEFs	GGUGGAG	0.0833333333333333
CUGGUCC	mmu-miR-1934	1.79956000528748	0.0359650705235867	1	154	T6Bwt_dox_vs_no_dox	MEFs	GGACCAG	20.0833333333333
CUUUGGU	mmu-miR-9	7.12449660507957	5.22308824166852e-13	3.14429912148445e-10	815	T6Bwt_dox_vs_no_dox	MEFs	ACCAAAG	790.416666666667
GAGGCAG	mmu-miR-709	2.09016499575619	0.0183014903824859	1	303	T6Bwt_dox_vs_no_dox	MEFs	CUGCCUC	0.0833333333333333
GCACCAC	mmu-miR-770-5p	2.99049913340181	0.00139260959801407	0.636422586292428	168	T6Bwt_dox_vs_no_dox	MEFs	GUGGUGC	136.166666666667
GCAGCUG	mmu-miR-1968	2.17887790031161	0.0146703699549409	1	260	T6Bwt_dox_vs_no_dox	MEFs	CAGCUGC	5.25
GCCGCCC	mmu-miR-1900	-0.0315722062163591	0.487406604281126	1	4	T6Bwt_dox_vs_no_dox	MEFs	GGGCGGC	0
GGCAGUG	mmu-miR-34a/mmu-miR-449a/mmu-miR-449c/mmu-miR-34b-5p/mmu-miR-34c/mmu-miR-449b	2.67359935602756	0.00375210216900742	1	358	T6Bwt_dox_vs_no_dox	MEFs	CACUGCC	23102.8333333333
GGCAUCU	mmu-miR-680	3.98316122314312	3.40022937704445e-05	0.0178172019357129	133	T6Bwt_dox_vs_no_dox	MEFs	AGAUGCC	0.166666666666667
GGGCUGG	mmu-miR-762	-1.9198437755251	0.0274388177843399	1	178	T6Bwt_dox_vs_no_dox	MEFs	CCAGCCC	2.16666666666667
GUCCAGG	mmu-miR-1956	2.12378437468422	0.0168440890845367	1	150	T6Bwt_dox_vs_no_dox	MEFs	CCUGGAC	0.75
GUGGGGA	mmu-miR-491	0.293558724205979	0.384547560001432	1	72	T6Bwt_dox_vs_no_dox	MEFs	UCCCCAC	54.25
UACAUAC	mmu-miR-466b-3p	5.74922495561685	4.48267340542724e-09	2.59546790174237e-06	383	T6Bwt_dox_vs_no_dox	MEFs	GUAUGUA	232.8025
UGUGCUU	mmu-miR-218	3.16679039498758	0.000770656847915207	0.362208718520147	548	T6Bwt_dox_vs_no_dox	MEFs	AAGCACA	7240
UUAUUGA	mmu-miR-325	1.15573614563926	0.123894549298357	1	1281	T6Bwt_dox_vs_no_dox	MEFs	UCAAUAA	0.0833333333333333
UUGGCAA	mmu-miR-182	7.3498648836583	9.92036572775727e-14	6.0117416310209e-11	685	T6Bwt_dox_vs_no_dox	MEFs	UUGCCAA	17850.5833333333
UUGGCAC	mmu-miR-96	6.1650349285098	3.52337919779101e-10	2.0787937266967e-07	670	T6Bwt_dox_vs_no_dox	MEFs	GUGCCAA	7144.33333333333
AACAUUC	mmu-miR-543	2.82615897848831	0.00235549382938651	1	364	T6Bwt_dox_vs_no_dox	MEFs	GAAUGUU	3079.75
AGUGGUU	mmu-miR-876-3p/mmu-miR-140	4.56592243734263	2.48651316410423e-06	0.00135763618760091	182	T6Bwt_dox_vs_no_dox	MEFs	AACCACU	10460.6666666667
CCAGUGU	mmu-miR-199a-5p	4.89595205066298	4.89154602500517e-07	0.000272459113592788	293	T6Bwt_dox_vs_no_dox	MEFs	ACACUGG	125842.624166667
CCCUGAG	mmu-miR-125a-5p/mmu-miR-351/mmu-miR-125b-5p	11.0954834486059	6.59723367447344e-29	4.1232710465459e-26	511	T6Bwt_dox_vs_no_dox	MEFs	CUCAGGG	995043.333333333
CCCUGUC	mmu-miR-339-5p	0.615377279256131	0.269152796345193	1	100	T6Bwt_dox_vs_no_dox	MEFs	GACAGGG	1738.41666666667
GAGAACU	mmu-miR-146a/mmu-miR-146b	0.406624290074225	0.342141977136446	1	115	T6Bwt_dox_vs_no_dox	MEFs	AGUUCUC	2350
GAGGUAG	mmu-miR-1961/mmu-let-7g/mmu-miR-98/mmu-let-7a/mmu-let-7b/mmu-let-7i/mmu-let-7d/mmu-let-7f/mmu-let-7e/mmu-let-7c	13.4943277223749	8.44443335712009e-42	5.2946597149143e-39	706	T6Bwt_dox_vs_no_dox	MEFs	CUACCUC	1324004.25
GAGGUAU	mmu-miR-202-3p	12.5055328131726	3.48156869999282e-36	2.1794620061955e-33	499	T6Bwt_dox_vs_no_dox	MEFs	AUACCUC	0.25
GAUCAGA	mmu-miR-383	2.25137586042884	0.0121808708613767	1	84	T6Bwt_dox_vs_no_dox	MEFs	UCUGAUC	7.5
UCCCUGA	mmu-miR-670	8.47120762404932	1.21430954468422e-17	7.44371750891426e-15	411	T6Bwt_dox_vs_no_dox	MEFs	UCAGGGA	1.08333333333333
AUUUAGA	mmu-miR-465a-5p/mmu-miR-465b-5p/mmu-miR-465c-5p	2.13891278419989	0.0162213662409246	1	254	T6Bwt_dox_vs_no_dox	MEFs	UCUAAAU	2.08333333333333
GGUGUGA	mmu-miR-1188	-0.235444363382269	0.40693192832993	1	74	T6Bwt_dox_vs_no_dox	MEFs	UCACACC	82.4166666666667
UCUCUGA	mmu-miR-1896	2.28662908892658	0.0111087409341751	1	204	T6Bwt_dox_vs_no_dox	MEFs	UCAGAGA	0.25
GGUCAGA	mmu-miR-540-3p	2.2317881169882	0.0128144850378953	1	145	T6Bwt_dox_vs_no_dox	MEFs	UCUGACC	1610.83333333333
AACAAAC	mmu-miR-1192/mmu-miR-495	3.97001039425122	3.59347482194361e-05	0.0187938733187651	488	T6Bwt_dox_vs_no_dox	MEFs	GUUUGUU	454.666666666667
AAGGCAC	mmu-miR-124	7.21325629380152	2.73147263674118e-13	1.65254094522841e-10	1113	T6Bwt_dox_vs_no_dox	MEFs	GUGCCUU	1.33333333333333
AAUACUG	mmu-miR-200b/mmu-miR-429/mmu-miR-200c	7.12693651926057	5.13136969364654e-13	3.09421592526887e-10	669	T6Bwt_dox_vs_no_dox	MEFs	CAGUAUU	27.6666666666667
ACAAUAU	mmu-miR-338-5p	4.58745137131837	2.2434494816538e-06	0.00122941031594628	514	T6Bwt_dox_vs_no_dox	MEFs	AUAUUGU	2.33333333333333
ACAGUAC	mmu-miR-101a/mmu-miR-101b	6.20960069379007	2.65597017472286e-10	1.57764628378538e-07	465	T6Bwt_dox_vs_no_dox	MEFs	GUACUGU	29621.4166666667
ACAGUAU	mmu-miR-144	5.53678692426412	1.54035481906955e-08	8.88784730603128e-06	496	T6Bwt_dox_vs_no_dox	MEFs	AUACUGU	3
ACCCUGU	mmu-miR-10a/mmu-miR-10b	3.74434702568149	9.04317655628257e-05	0.0464819274992924	167	T6Bwt_dox_vs_no_dox	MEFs	ACAGGGU	34769.3333333333
ACUGUGU	mmu-miR-881	2.44043797857096	0.00733473232712196	1	115	T6Bwt_dox_vs_no_dox	MEFs	ACACAGU	85.75
AGGAAAG	mmu-miR-1958	1.8173451875228	0.034582137468755	1	275	T6Bwt_dox_vs_no_dox	MEFs	CUUUCCU	1.66666666666667
AUACACA	mmu-miR-466f-3p	4.37573703766942	6.05114222122702e-06	0.00323130994613523	501	T6Bwt_dox_vs_no_dox	MEFs	UGUGUAU	135.369166666667
AUAUAAC	mmu-miR-344d/mmu-miR-410/mmu-miR-344e	3.40188540391573	0.00033461346670402	0.164295212151674	390	T6Bwt_dox_vs_no_dox	MEFs	GUUAUAU	2652.25
AUUGCAC	mmu-miR-25/mmu-miR-92a/mmu-miR-363-3p/mmu-miR-367/mmu-miR-32/mmu-miR-92b	6.79427137200379	5.44306514176903e-12	3.25495295477788e-09	565	T6Bwt_dox_vs_no_dox	MEFs	GUGCAAU	159569.625
CACAGUG	mmu-miR-128	7.40300061540818	6.65705662085751e-14	4.04083336886051e-11	672	T6Bwt_dox_vs_no_dox	MEFs	CACUGUG	1710.58333333333
CAGUGCA	mmu-miR-148a/mmu-miR-148b/mmu-miR-152	8.56729014323428	5.29743513279661e-18	3.26322004180271e-15	409	T6Bwt_dox_vs_no_dox	MEFs	UGCACUG	44087.9966666667
CAGUGCU	mmu-miR-1960	5.44830924678904	2.54254441341935e-08	1.4594204933027e-05	307	T6Bwt_dox_vs_no_dox	MEFs	AGCACUG	3
CUACAGU	mmu-miR-139-5p	4.8884330510959	5.08208757015583e-07	0.000282291697443094	199	T6Bwt_dox_vs_no_dox	MEFs	ACUGUAG	35.0833333333333
GCUACAU	mmu-miR-222/mmu-miR-1928/mmu-miR-221	7.84400473098648	2.1820032598907e-15	1.32883998527344e-12	232	T6Bwt_dox_vs_no_dox	MEFs	AUGUAGC	177921.333333333
GGUUACC	mmu-miR-409-5p	2.69605231353873	0.00350833230265219	1	70	T6Bwt_dox_vs_no_dox	MEFs	GGUAACC	2029.75
GUAAACA	mmu-miR-30b/mmu-miR-30a/mmu-miR-30e/mmu-miR-384-5p/mmu-miR-30c/mmu-miR-30d	9.65792124149135	2.27501353549507e-22	1.41050839200695e-19	915	T6Bwt_dox_vs_no_dox	MEFs	UGUUUAC	153283.166666667
GUGUGUG	mmu-miR-466k/mmu-miR-466i-5p/mmu-miR-466d-5p	1.1194410907831	0.131476004627001	1	260	T6Bwt_dox_vs_no_dox	MEFs	CACACAC	41.5558333333333
UAGAGGA	mmu-miR-877	2.07204297730632	0.0191307166939169	1	65	T6Bwt_dox_vs_no_dox	MEFs	UCCUCUA	37.6666666666667
UCAAGUA	mmu-miR-26b/mmu-miR-26a	10.4420756360108	7.96445764229927e-26	4.95389265351015e-23	599	T6Bwt_dox_vs_no_dox	MEFs	UACUUGA	116093.166666667
UCACAGC	mmu-miR-673-5p	6.13044570479734	4.38166103855795e-10	2.58079835171063e-07	568	T6Bwt_dox_vs_no_dox	MEFs	GCUGUGA	853.916666666667
UCACAGU	mmu-miR-27a/mmu-miR-27b	9.44492245733601	1.77833783308566e-21	1.10079111868002e-18	766	T6Bwt_dox_vs_no_dox	MEFs	ACUGUGA	197900.388333333
UCAGUGA	mmu-miR-677	4.52465075674044	3.02476592030747e-06	0.00164244789472696	211	T6Bwt_dox_vs_no_dox	MEFs	UCACUGA	34.75
UGGUGGC	mmu-miR-546	0.0399166213205796	0.484079799883077	1	104	T6Bwt_dox_vs_no_dox	MEFs	GCCACCA	0.166666666666667
UGCAGUC	mmu-miR-682	2.54495755432528	0.00546455111229393	1	125	T6Bwt_dox_vs_no_dox	MEFs	GACUGCA	0.0833333333333333
ACAUCCU	mmu-miR-697	2.79308863158583	0.00261036925818776	1	120	T6Bwt_dox_vs_no_dox	MEFs	AGGAUGU	0.0833333333333333
CUUGUGU	mmu-miR-669d	0.323974567230771	0.372978644542952	1	75	T6Bwt_dox_vs_no_dox	MEFs	ACACAAG	347
UAUUGCU	mmu-miR-137	6.99443447530327	1.33165509238423e-12	8.00324710522922e-10	695	T6Bwt_dox_vs_no_dox	MEFs	AGCAAUA	0.583333333333333
AAUGCCC	mmu-miR-365	6.70891209595387	9.80403683326542e-12	5.84320595262619e-09	162	T6Bwt_dox_vs_no_dox	MEFs	GGGCAUU	3570.91666666667
ACAUAGA	mmu-miR-376c	-0.604100341617608	0.272888466218662	1	142	T6Bwt_dox_vs_no_dox	MEFs	UCUAUGU	972
AGGGAGC	mmu-miR-1966	0.862531470726475	0.194197561410909	1	59	T6Bwt_dox_vs_no_dox	MEFs	GCUCCCU	0.875
AGGGAGG	mmu-miR-1943	2.48435019325869	0.0064894051951286	1	123	T6Bwt_dox_vs_no_dox	MEFs	CCUCCCU	135.666666666667
AUAAAGU	mmu-miR-142-5p	5.14101528662188	1.36628908869207e-07	7.73319624199714e-05	456	T6Bwt_dox_vs_no_dox	MEFs	ACUUUAU	4.75
CAGUAGU	mmu-miR-199a-3p	6.71301999375955	9.53184901590999e-12	5.69051386249827e-09	262	T6Bwt_dox_vs_no_dox	MEFs	ACUACUG	216768.666666667
CUCCCUU	mmu-miR-343	1.84696998349373	0.0323757453695289	1	146	T6Bwt_dox_vs_no_dox	MEFs	AAGGGAG	0.25
GUAGUGU	mmu-miR-142-3p	5.07645680445571	1.92269083698527e-07	0.000108247494122271	216	T6Bwt_dox_vs_no_dox	MEFs	ACACUAC	9.66666666666667
GUGAGUU	mmu-miR-804	-0.683201644781017	0.247239716734712	1	56	T6Bwt_dox_vs_no_dox	MEFs	AACUCAC	0
UGUUGAA	mmu-miR-653	-0.187187439661594	0.425756836240158	1	100	T6Bwt_dox_vs_no_dox	MEFs	UUCAACA	0.416666666666667
UUUUCAU	mmu-miR-335-3p	1.92432838851731	0.0271567171821305	1	383	T6Bwt_dox_vs_no_dox	MEFs	AUGAAAA	96.25
AUACAAG	mmu-miR-539-3p/mmu-miR-381	2.24975206042112	0.0122323443663421	1	538	T6Bwt_dox_vs_no_dox	MEFs	CUUGUAU	2647.83333333333
CAGCUGA	mmu-miR-1190	1.21989712659502	0.111251937621528	1	179	T6Bwt_dox_vs_no_dox	MEFs	UCAGCUG	0.75
CAGCUGG	mmu-miR-763	0.4832000076268	0.314476864966597	1	226	T6Bwt_dox_vs_no_dox	MEFs	CCAGCUG	0
CCUGUAC	mmu-miR-3107	0.880791936062927	0.189215222579693	1	72	T6Bwt_dox_vs_no_dox	MEFs	GUACAGG	861.5
GCUGAGA	mmu-miR-883a-5p	2.67712216180329	0.00371287772586245	1	156	T6Bwt_dox_vs_no_dox	MEFs	UCUCAGC	0.333333333333333
UAUCCUG	mmu-miR-687	3.1863575243801	0.0007203821570158	0.339299995954442	64	T6Bwt_dox_vs_no_dox	MEFs	CAGGAUA	0.25
AAAGCUG	mmu-miR-320	5.06774450698973	2.01278616551519e-07	0.000113118582501954	400	T6Bwt_dox_vs_no_dox	MEFs	CAGCUUU	11524.0833333333
UAUACAC	mmu-miR-467f	1.59371800998024	0.0554996042709098	1	470	T6Bwt_dox_vs_no_dox	MEFs	GUGUAUA	0.0383333333333333
AAAGACA	mmu-miR-743a/mmu-miR-743b-3p	3.57265142541431	0.000176692507878587	0.0883462539392937	370	T6Bwt_dox_vs_no_dox	MEFs	UGUCUUU	2.08333333333333
AGCACCA	mmu-miR-29a/mmu-miR-29b/mmu-miR-29c	9.34717807169895	4.50086569261833e-21	2.78153499803813e-18	695	T6Bwt_dox_vs_no_dox	MEFs	UGGUGCU	685750.249166667
AGGUAGU	mmu-miR-196b/mmu-miR-196a	3.6176923260962	0.000148620721377561	0.0749048435742907	174	T6Bwt_dox_vs_no_dox	MEFs	ACUACCU	10433.4166666667
CAAGAGC	mmu-miR-335-5p	1.57806080812048	0.0572758203919135	1	122	T6Bwt_dox_vs_no_dox	MEFs	GCUCUUG	192.416666666667
CAAGUCU	mmu-miR-710	4.46516282431394	4.00039407634752e-06	0.00216021280122766	189	T6Bwt_dox_vs_no_dox	MEFs	AGACUUG	0
CAGAUGU	mmu-miR-1942	2.01038684922476	0.0221951306247438	1	139	T6Bwt_dox_vs_no_dox	MEFs	ACAUCUG	0.0833333333333333
CUGGCUC	mmu-miR-149	2.16136906742752	0.0153334207813198	1	206	T6Bwt_dox_vs_no_dox	MEFs	GAGCCAG	1923.58333333333
GGAGAGA	mmu-miR-185/mmu-miR-882/mmu-miR-3473	-1.30027328907653	0.0967536597402863	1	119	T6Bwt_dox_vs_no_dox	MEFs	UCUCUCC	2204.66666666667
GGCUCAG	mmu-miR-24	6.97467249010595	1.53292090393766e-12	9.19752542362594e-10	342	T6Bwt_dox_vs_no_dox	MEFs	CUGAGCC	155882.833333333
GUGACAG	mmu-miR-542-3p	1.25179119842008	0.105322979071272	1	121	T6Bwt_dox_vs_no_dox	MEFs	CUGUCAC	1151.83333333333
GUUUUCC	mmu-miR-684	2.50766105238887	0.00607665917928996	1	165	T6Bwt_dox_vs_no_dox	MEFs	GGAAAAC	0
UCACAUU	mmu-miR-23a/mmu-miR-23b	8.86930195680583	3.6802918524476e-19	2.27074007296017e-16	643	T6Bwt_dox_vs_no_dox	MEFs	AAUGUGA	108212.5
UGCAUUG	mmu-miR-33	1.93028421099092	0.0267858161455283	1	207	T6Bwt_dox_vs_no_dox	MEFs	CAAUGCA	1945.33333333333
AGUGGUA	mmu-miR-1957	3.77448060037267	8.01706922804071e-05	0.0415284186012509	92	T6Bwt_dox_vs_no_dox	MEFs	UACCACU	0
UAGUGGA	mmu-miR-1951	-0.354593653788101	0.361447015579575	1	55	T6Bwt_dox_vs_no_dox	MEFs	UCCACUA	3.08333333333333
UCCCUUU	mmu-miR-211/mmu-miR-204	5.69789610926371	6.06474618856075e-09	3.50542329698811e-06	338	T6Bwt_dox_vs_no_dox	MEFs	AAAGGGA	2.16666666666667
AAUCUCA	mmu-miR-216a	-0.543470927445108	0.293402801267724	1	123	T6Bwt_dox_vs_no_dox	MEFs	UGAGAUU	0.166666666666667
CUGAAAA	mmu-miR-875-3p	5.76247078686918	4.14456969044153e-09	2.40385042045609e-06	497	T6Bwt_dox_vs_no_dox	MEFs	UUUUCAG	2.25
CUGAGUC	mmu-miR-1199	2.92403185431994	0.0017276469274038	0.77744111733171	109	T6Bwt_dox_vs_no_dox	MEFs	GACUCAG	0.666666666666667
GAGAAAC	mmu-miR-706	2.58496076077372	0.00486950401838313	1	267	T6Bwt_dox_vs_no_dox	MEFs	GUUUCUC	1.125
CACUGAG	mmu-miR-674/mmu-miR-3473d	5.33230964504982	4.84856997740446e-08	2.77823059705275e-05	178	T6Bwt_dox_vs_no_dox	MEFs	CUCAGUG	1388.75
CUGGACU	mmu-miR-378	0.752986620019279	0.225728977169903	1	78	T6Bwt_dox_vs_no_dox	MEFs	AGUCCAG	3523.83333333333
GUGGGAG	mmu-miR-705	1.71241923409778	0.0434097184864423	1	74	T6Bwt_dox_vs_no_dox	MEFs	CUCCCAC	0.25
UCCAGUU	mmu-miR-145	6.17435748490434	3.32165369914751e-10	1.96309733619618e-07	407	T6Bwt_dox_vs_no_dox	MEFs	AACUGGA	34853.3333333333
UUCCUGA	mmu-miR-691	5.17834149032991	1.1193358385635e-07	6.36902092142631e-05	359	T6Bwt_dox_vs_no_dox	MEFs	UCAGGAA	0
GGAAUGU	mmu-miR-1a/mmu-miR-206	5.90558932395726	1.75694164457396e-09	1.02781086207577e-06	495	T6Bwt_dox_vs_no_dox	MEFs	ACAUUCC	2956.5275
GUGCUCA	mmu-miR-764-5p	4.91720546012118	4.38941999452766e-07	0.000245368577694096	146	T6Bwt_dox_vs_no_dox	MEFs	UGAGCAC	0
UUGGUCC	mmu-miR-133a/mmu-miR-133b	5.092807129859	1.76400274064695e-07	9.94897545724878e-05	399	T6Bwt_dox_vs_no_dox	MEFs	GGACCAA	6.66666666666667
UAAAGGC	mmu-miR-1971/mmu-miR-1981	3.25080645423279	0.000575390850697991	0.275612217484338	220	T6Bwt_dox_vs_no_dox	MEFs	GCCUUUA	257.208333333333
AAAGAAU	mmu-miR-186	5.94433523283145	1.3879050733862e-09	8.16088183151085e-07	401	T6Bwt_dox_vs_no_dox	MEFs	AUUCUUU	19566
AGCAGCG	mmu-miR-503	5.45516212773592	2.44640911586852e-08	1.4066852416244e-05	225	T6Bwt_dox_vs_no_dox	MEFs	CGCUGCU	4374.33333333333
GAGGCUG	mmu-miR-1962/mmu-miR-485	2.7329355782346	0.00313863044194104	1	155	T6Bwt_dox_vs_no_dox	MEFs	CAGCCUC	480.833333333333
AAGGCUA	mmu-miR-690	4.48001613557866	3.73186983203449e-06	0.00201894157913066	290	T6Bwt_dox_vs_no_dox	MEFs	UAGCCUU	4.16666666666667
ACAGUUG	mmu-miR-582-5p	2.02393144023136	0.0214886032300014	1	210	T6Bwt_dox_vs_no_dox	MEFs	CAACUGU	503.833333333333
ACAUUAC	mmu-miR-323-3p	3.79156589777031	7.48502071916584e-05	0.0389221077396623	304	T6Bwt_dox_vs_no_dox	MEFs	GUAAUGU	518.083333333333
AGCCACA	mmu-miR-693-5p	2.66095534280841	0.003895964539947	1	151	T6Bwt_dox_vs_no_dox	MEFs	UGUGGCU	0.916666666666667
AUUAUUA	mmu-miR-126-5p	3.18783978166427	0.000716699683085696	0.338282250416449	302	T6Bwt_dox_vs_no_dox	MEFs	UAAUAAU	317.25
CUGCUGU	mmu-miR-683	0.934914793505356	0.174916106284269	1	157	T6Bwt_dox_vs_no_dox	MEFs	ACAGCAG	0
UCCUUCA	mmu-miR-712	5.02480740839756	2.51968996576457e-07	0.000141354607079392	289	T6Bwt_dox_vs_no_dox	MEFs	UGAAGGA	0
UCUCGGC	mmu-miR-719	-0.192552588649803	0.423654689361616	1	4	T6Bwt_dox_vs_no_dox	MEFs	GCCGAGA	0.0833333333333333
UCUUGGA	mmu-miR-470	2.26845147210582	0.0116508517944018	1	138	T6Bwt_dox_vs_no_dox	MEFs	UCCAAGA	0.833333333333333
UGAAAGG	mmu-miR-488	4.45659026186613	4.1636773909151e-06	0.00223589475892141	172	T6Bwt_dox_vs_no_dox	MEFs	CCUUUCA	0
UUUGCAG	mmu-miR-450b-5p	0.495030459978427	0.310289309724366	1	260	T6Bwt_dox_vs_no_dox	MEFs	CUGCAAA	761.583333333333
UUUUUGC	mmu-miR-129-5p	3.26652743209021	0.000544376294054063	0.262389373734058	280	T6Bwt_dox_vs_no_dox	MEFs	GCAAAAA	10400.5
AGUGCAA	mmu-miR-130a/mmu-miR-721/mmu-miR-301a/mmu-miR-130b/mmu-miR-301b	10.0858708719026	3.1898463333159e-24	1.98089457298917e-21	522	T6Bwt_dox_vs_no_dox	MEFs	UUGCACU	45271.5
GCUGGUG	mmu-miR-138	4.53024314320261	2.94579216370086e-06	0.00160251093705327	336	T6Bwt_dox_vs_no_dox	MEFs	CACCAGC	638.666666666667
GUGCAAA	mmu-miR-19a/mmu-miR-19b	10.5437958900369	2.7131738620562e-26	1.69030731606101e-23	714	T6Bwt_dox_vs_no_dox	MEFs	UUUGCAC	74291.0833333333
ACUGCAU	mmu-miR-217	2.39678342121629	0.00826984833029716	1	175	T6Bwt_dox_vs_no_dox	MEFs	AUGCAGU	24.0833333333333
GACACCU	mmu-miR-667	2.6941483551877	0.00352843732893011	1	59	T6Bwt_dox_vs_no_dox	MEFs	AGGUGUC	433.916666666667
UGCAUAG	mmu-miR-153	7.53281915697668	2.48281814353767e-14	1.5095534312709e-11	476	T6Bwt_dox_vs_no_dox	MEFs	CUAUGCA	0.166666666666667
AAUCUCU	mmu-miR-216b	-0.316993958158562	0.375624093360647	1	130	T6Bwt_dox_vs_no_dox	MEFs	AGAGAUU	0.416666666666667
CUCAAAC	mmu-miR-290-5p/mmu-miR-292-5p	1.98000749040252	0.0238513435102816	1	165	T6Bwt_dox_vs_no_dox	MEFs	GUUUGAG	1.70833333333333
GCAUAUA	mmu-miR-669i/mmu-miR-669j	1.92029046555918	0.0274106100126037	1	258	T6Bwt_dox_vs_no_dox	MEFs	UAUAUGC	1.33333333333333
UGGUUGA	mmu-miR-380-5p	-0.631601610373992	0.26382361701228	1	78	T6Bwt_dox_vs_no_dox	MEFs	UCAACCA	297.916666666667
AAGUGCC	mmu-miR-467a/mmu-miR-290-3p/mmu-miR-292-3p	4.7350710885996	1.09489165811313e-06	0.00060219041196222	229	T6Bwt_dox_vs_no_dox	MEFs	GGCACUU	1146.925
AAUUUUA	mmu-miR-590-3p	4.91003423848978	4.55302462345037e-07	0.00025405877398853	560	T6Bwt_dox_vs_no_dox	MEFs	UAAAAUU	0.333333333333333
AUGGCUU	mmu-miR-135a/mmu-miR-135b	5.17415833948748	1.14470309145474e-07	6.50191355946295e-05	457	T6Bwt_dox_vs_no_dox	MEFs	AAGCCAU	2815.91666666667
CAUGACA	mmu-miR-878-3p	0.540372526237799	0.294470075385147	1	99	T6Bwt_dox_vs_no_dox	MEFs	UGUCAUG	95.7916666666667
CUCUGGG	mmu-miR-330/mmu-miR-326	1.07883610002619	0.140330399374902	1	193	T6Bwt_dox_vs_no_dox	MEFs	CCCAGAG	228.833333333333
UAAUGCU	mmu-miR-155	2.57907651935311	0.00495324199723008	1	216	T6Bwt_dox_vs_no_dox	MEFs	AGCAUUA	3336.75
UAUAAAG	mmu-miR-340-5p	4.45968983628909	4.10391730066131e-06	0.00220790750775578	817	T6Bwt_dox_vs_no_dox	MEFs	CUUUAUA	1931.25
UUCCUAG	mmu-miR-384-3p	0.662069755448578	0.253963258932108	1	138	T6Bwt_dox_vs_no_dox	MEFs	CUAGGAA	0.666666666666667
AAGUCAC	mmu-miR-224	0.283849023184836	0.388263041925604	1	201	T6Bwt_dox_vs_no_dox	MEFs	GUGACUU	2901.33333333333
AUCUUAG	mmu-miR-1941-3p	3.30816195711281	0.000469552415960154	0.227732921740675	63	T6Bwt_dox_vs_no_dox	MEFs	CUAAGAU	11.75
AUGCAUA	mmu-miR-669h-3p/mmu-miR-669k	5.28311626242615	6.35023667432406e-08	3.62598514103904e-05	255	T6Bwt_dox_vs_no_dox	MEFs	UAUGCAU	0.583333333333333
CUCACCC	mmu-miR-1982.1	2.12682588508684	0.0167172763599225	1	69	T6Bwt_dox_vs_no_dox	MEFs	GGGUGAG	12.5
CUGCAUC	mmu-miR-1950	2.74847671496637	0.0029936443713289	1	147	T6Bwt_dox_vs_no_dox	MEFs	GAUGCAG	10.5833333333333
CUGUUGA	mmu-miR-582-3p	0.473751292514291	0.317838635870905	1	74	T6Bwt_dox_vs_no_dox	MEFs	UCAACAG	72.1666666666667
CUUGAGG	mmu-miR-327	2.00565331549403	0.0224466246577197	1	86	T6Bwt_dox_vs_no_dox	MEFs	CCUCAAG	0.0833333333333333
GCAUCCC	mmu-miR-324-5p	1.64968827650562	0.0495033546123974	1	70	T6Bwt_dox_vs_no_dox	MEFs	GGGAUGC	2715
UAAGUGC	mmu-miR-467b	3.76845591510226	8.2130243693838e-05	0.0424613359897143	183	T6Bwt_dox_vs_no_dox	MEFs	GCACUUA	1146.63333333333
UAAGUGU	mmu-miR-467e/mmu-miR-467h	2.02250298991507	0.0215622075132858	1	125	T6Bwt_dox_vs_no_dox	MEFs	ACACUUA	391.958333333333
UACAGAC	mmu-miR-466g	0.959859791128504	0.168562892610452	1	281	T6Bwt_dox_vs_no_dox	MEFs	GUCUGUA	40.375
UCACCUG	mmu-miR-412-3p/mmu-miR-1983	3.57853920129979	0.000172760024366369	0.0865527722075507	111	T6Bwt_dox_vs_no_dox	MEFs	CAGGUGA	7788.58333333333
UCAUGAU	mmu-miR-433	3.99892340790601	3.18156330459869e-05	0.0167350229821891	176	T6Bwt_dox_vs_no_dox	MEFs	AUCAUGA	2887.83333333333
UGAAAAU	mmu-miR-694	4.5798141744572	2.32694613804667e-06	0.00127283953751153	624	T6Bwt_dox_vs_no_dox	MEFs	AUUUUCA	37.75
UUGCUUC	mmu-miR-686	1.47753281987629	0.0697664337014832	1	212	T6Bwt_dox_vs_no_dox	MEFs	GAAGCAA	0
UUGGUAC	mmu-miR-547	4.3792147988943	5.95538440745967e-06	0.00318613065799092	280	T6Bwt_dox_vs_no_dox	MEFs	GUACCAA	22.25
UUUGGAU	mmu-miR-1897-5p	2.0005560671904	0.0227201260330676	1	177	T6Bwt_dox_vs_no_dox	MEFs	AUCCAAA	0
GGAAGCC	mmu-miR-671-5p	1.57736994650362	0.0573552132272546	1	162	T6Bwt_dox_vs_no_dox	MEFs	GGCUUCC	415.916666666667
UGCCCUG	mmu-miR-874	1.45004317963973	0.0735232392364954	1	129	T6Bwt_dox_vs_no_dox	MEFs	CAGGGCA	23.9166666666667
AAGUGCA	mmu-miR-291b-3p	8.5665249162544	5.33274137608281e-18	3.27963594629093e-15	527	T6Bwt_dox_vs_no_dox	MEFs	UGCACUU	0.5
AUCAAAG	mmu-miR-291a-5p/mmu-miR-291b-5p	2.83280509346143	0.00230707553074926	1	408	T6Bwt_dox_vs_no_dox	MEFs	CUUUGAU	0.916666666666667
AUGGCAC	mmu-miR-183	3.67699850043535	0.000117997213646862	0.0601785789598997	267	T6Bwt_dox_vs_no_dox	MEFs	GUGCCAU	10308.75
CUCACAC	mmu-miR-342-3p	2.37310673834686	0.00881958283447682	1	147	T6Bwt_dox_vs_no_dox	MEFs	GUGUGAG	2677.83333333333
GAGGUUG	mmu-miR-672	3.20900491849786	0.000665976067773027	0.315672656124415	106	T6Bwt_dox_vs_no_dox	MEFs	CAACCUC	7.66666666666667
UAAGACG	mmu-miR-208b/mmu-miR-208a-3p	2.59083056245642	0.0047872309517782	1	107	T6Bwt_dox_vs_no_dox	MEFs	CGUCUUA	0.0833333333333333
UAAGACU	mmu-miR-499	1.85173281957622	0.0320320993768254	1	176	T6Bwt_dox_vs_no_dox	MEFs	AGUCUUA	7.66666666666667
UCACAAA	mmu-miR-350	3.40538466807802	0.000330354574314415	0.162534450562692	530	T6Bwt_dox_vs_no_dox	MEFs	UUUGUGA	2949.08333333333
UCUAGGA	mmu-miR-1929	0.865817112485653	0.193295231667828	1	87	T6Bwt_dox_vs_no_dox	MEFs	UCCUAGA	8.25
UUGUGAC	mmu-miR-758	2.94296865539631	0.00162540665217577	0.735728858433245	119	T6Bwt_dox_vs_no_dox	MEFs	GUCACAA	95.8333333333333
UUGUGUC	mmu-miR-592	0.676504067926316	0.249360332084647	1	118	T6Bwt_dox_vs_no_dox	MEFs	GACACAA	1.58333333333333
UUUGUGU	mmu-miR-669n	2.38821976892876	0.00846510715954519	1	198	T6Bwt_dox_vs_no_dox	MEFs	ACACAAA	0.166666666666667
CAGCUUU	mmu-miR-693-3p	4.42491788612793	4.8239486990518e-06	0.00258563650269177	283	T6Bwt_dox_vs_no_dox	MEFs	AAAGCUG	10.9166666666667
GUCUGCC	mmu-miR-346	-0.146137948193474	0.44190624482622	1	72	T6Bwt_dox_vs_no_dox	MEFs	GGCAGAC	0.0833333333333333
GUCUUGC	mmu-miR-431	1.30882161630988	0.0952973914557772	1	76	T6Bwt_dox_vs_no_dox	MEFs	GCAAGAC	1913.5
GUUUUGU	mmu-miR-669b	-0.086316110040858	0.4656075661553	1	201	T6Bwt_dox_vs_no_dox	MEFs	ACAAAAC	146.1275
UAUCAGA	mmu-miR-361	2.3173002040425	0.0102436921026128	1	114	T6Bwt_dox_vs_no_dox	MEFs	UCUGAUA	7592.75
UGAAAUG	mmu-miR-203	6.20010213454793	2.82132654390441e-10	1.67304664053531e-07	436	T6Bwt_dox_vs_no_dox	MEFs	CAUUUCA	37.5
UGUAUAA	mmu-miR-568	0.25944448367609	0.397646155668175	1	228	T6Bwt_dox_vs_no_dox	MEFs	UUAUACA	0
CAGGAAC	mmu-miR-873	2.63206371015525	0.00424339733040106	1	148	T6Bwt_dox_vs_no_dox	MEFs	GUUCCUG	438.833333333333
GAGGCUU	mmu-miR-879	3.40717826473283	0.000328191210436737	0.161798266745311	90	T6Bwt_dox_vs_no_dox	MEFs	AAGCCUC	0.25
GUGGGCC	mmu-miR-770-3p	-0.539253628639284	0.294855930343414	1	43	T6Bwt_dox_vs_no_dox	MEFs	GGCCCAC	113.75
AAGGUGC	mmu-miR-18a/mmu-miR-18b	4.32509794454284	7.62320527265677e-06	0.0040555452050534	144	T6Bwt_dox_vs_no_dox	MEFs	GCACCUU	14046.4166666667
AAGUGCG	mmu-miR-467c/mmu-miR-467d	4.68521570406859	1.39832621309402e-06	0.000767681090988617	114	T6Bwt_dox_vs_no_dox	MEFs	CGCACUU	685.290833333333
CUCCCAA	mmu-miR-150/mmu-miR-5127	1.97468190744733	0.0241521286944453	1	147	T6Bwt_dox_vs_no_dox	MEFs	UUGGGAG	12.5833333333333
CUCCCAC	mmu-miR-532-3p	1.09808137061308	0.136084479658098	1	124	T6Bwt_dox_vs_no_dox	MEFs	GUGGGAG	1336.08333333333
GAGGAUC	mmu-miR-1967	1.66076571322879	0.0483802548902102	1	47	T6Bwt_dox_vs_no_dox	MEFs	GAUCCUC	0.166666666666667
AGCAGCA	mmu-miR-497/mmu-miR-195/mmu-miR-15a/mmu-miR-16/mmu-miR-322/mmu-miR-1907/mmu-miR-15b	8.33817089301567	3.7724241233709e-17	2.30872356350299e-14	756	T6Bwt_dox_vs_no_dox	MEFs	UGCUGCU	84183.1666666667
AGGUAGA	mmu-miR-1839-5p	8.5560655760959	5.83924419388816e-18	3.58529593504733e-15	213	T6Bwt_dox_vs_no_dox	MEFs	UCUACCU	1793.58333333333
CAGAGUG	mmu-miR-759	0.399955575566029	0.344594618727561	1	85	T6Bwt_dox_vs_no_dox	MEFs	CACUCUG	0.75
CAGGCUC	mmu-miR-484	1.34580428945832	0.0891828208607956	1	153	T6Bwt_dox_vs_no_dox	MEFs	GAGCCUG	12574.0833333333
CUGCAGA	mmu-miR-1954	3.75110217478611	8.80294652208339e-05	0.0453351745887295	218	T6Bwt_dox_vs_no_dox	MEFs	UCUGCAG	1.58333333333333
GCAGCAU	mmu-miR-103/mmu-miR-107	5.92212495795018	1.58903991413126e-09	9.32766429595049e-07	350	T6Bwt_dox_vs_no_dox	MEFs	AUGCUGC	69851.8333333333
GCUGCAG	mmu-miR-666-3p	3.4357456252359	0.000295462762478672	0.145958604664464	204	T6Bwt_dox_vs_no_dox	MEFs	CUGCAGC	76.75
AGCUGCC	mmu-miR-22	3.69867329429167	0.000108364677188146	0.0553743500431425	263	T6Bwt_dox_vs_no_dox	MEFs	GGCAGCU	139803.75
AGGAGCU	mmu-miR-28/mmu-miR-708	3.12183687576888	0.000898632464805418	0.416965463669714	92	T6Bwt_dox_vs_no_dox	MEFs	AGCUCCU	12911.75
AUGCAAG	mmu-miR-300	3.50222226796283	0.000230697268324515	0.114656542357284	209	T6Bwt_dox_vs_no_dox	MEFs	CUUGCAU	10330.5141666667
GAGGUGC	mmu-miR-1902	2.42216472234781	0.00771417765673228	1	72	T6Bwt_dox_vs_no_dox	MEFs	GCACCUC	0
GAGUGUG	mmu-miR-574-5p	0.313580757831594	0.376919737963402	1	70	T6Bwt_dox_vs_no_dox	MEFs	CACACUC	2027.125
GAGUUCG	mmu-miR-1195	1.40875496559187	0.0794538178613134	1	32	T6Bwt_dox_vs_no_dox	MEFs	CGAACUC	0.166666666666667
GAUAUGU	mmu-miR-190/mmu-miR-190b	1.94922437248856	0.0256343177839483	1	82	T6Bwt_dox_vs_no_dox	MEFs	ACAUAUC	970
GGACGGA	mmu-miR-184	0.421724623255541	0.336613014751801	1	12	T6Bwt_dox_vs_no_dox	MEFs	UCCGUCC	9.33333333333333
GGAGUGU	mmu-miR-122	1.93040428971221	0.026778381918992	1	99	T6Bwt_dox_vs_no_dox	MEFs	ACACUCC	35.1666666666667
GUCAUGG	mmu-miR-1933-5p	-0.0780110374451308	0.468909636569831	1	62	T6Bwt_dox_vs_no_dox	MEFs	CCAUGAC	5.33333333333333
UAGGUAU	mmu-miR-331-5p	0.765227448100043	0.222068058915788	1	44	T6Bwt_dox_vs_no_dox	MEFs	AUACCUA	335.5
UCACACA	mmu-miR-377	1.31126170694172	0.0948846804811473	1	285	T6Bwt_dox_vs_no_dox	MEFs	UGUGUGA	3407.58333333333
UGAGGAC	mmu-miR-1224	0.853841270415291	0.19659647197835	1	64	T6Bwt_dox_vs_no_dox	MEFs	GUCCUCA	0.75
UGGCCCU	mmu-miR-328	-0.564211731193374	0.286305022487389	1	95	T6Bwt_dox_vs_no_dox	MEFs	AGGGCCA	1876.75
UUCUGCU	mmu-miR-1904	2.67001581150082	0.00379238375937551	1	222	T6Bwt_dox_vs_no_dox	MEFs	AGCAGAA	0
AAAGCCA	mmu-miR-742	2.84370172069848	0.00222963860339466	0.99588393357335	363	T6Bwt_dox_vs_no_dox	MEFs	UGGCUUU	0.25
AUGUCUG	mmu-miR-654-3p	1.87481782079639	0.0304088953346654	1	74	T6Bwt_dox_vs_no_dox	MEFs	CAGACAU	0.916666666666667
GCCCACC	mmu-miR-702	-0.419801067048117	0.337315392665087	1	81	T6Bwt_dox_vs_no_dox	MEFs	GGUGGGC	1.16666666666667
UGGAGGA	mmu-miR-1940	0.638379040496668	0.261613485635978	1	91	T6Bwt_dox_vs_no_dox	MEFs	UCCUCCA	3.58333333333333
GAUUGAC	mmu-miR-509-3p	-0.859845093577362	0.19493721913235	1	52	T6Bwt_dox_vs_no_dox	MEFs	GUCAAUC	1
UGACCUA	mmu-miR-192/mmu-miR-215	1.10353544468356	0.134897353943679	1	77	T6Bwt_dox_vs_no_dox	MEFs	UAGGUCA	1614.58333333333
GGAAGAC	mmu-miR-7a/mmu-miR-7b	3.34989701322947	0.000404208057756481	0.19644511606965	254	T6Bwt_dox_vs_no_dox	MEFs	GUCUUCC	23388
AUUCUCG	mmu-miR-698	-0.385436510386339	0.349957018386843	1	46	T6Bwt_dox_vs_no_dox	MEFs	CGAGAAU	0.0833333333333333
AUAAUAC	mmu-miR-369-3p	3.53032059845771	0.000207528195780458	0.103349041498668	377	T6Bwt_dox_vs_no_dox	MEFs	GUAUUAU	2270.66666666667
GGCAAGA	mmu-miR-31	4.97353723450529	3.2871069717798e-07	0.000184077990419669	208	T6Bwt_dox_vs_no_dox	MEFs	UCUUGCC	6233.5
GGGAGAU	mmu-miR-1941-5p	1.08287825251057	0.139431232998337	1	64	T6Bwt_dox_vs_no_dox	MEFs	AUCUCCC	34.0833333333333
GUGUGCA	mmu-miR-466j/mmu-miR-466h-5p/mmu-miR-466m-5p	2.51494076730277	0.00595261918668365	1	152	T6Bwt_dox_vs_no_dox	MEFs	UGCACAC	2.31666666666667
UCAACAG	mmu-miR-421	2.62721955677912	0.00430428845685085	1	212	T6Bwt_dox_vs_no_dox	MEFs	CUGUUGA	833.75
UCUCUUU	mmu-miR-692	2.25531407090855	0.0120568110200143	1	323	T6Bwt_dox_vs_no_dox	MEFs	AAAGAGA	0.25
AACAGUC	mmu-miR-132/mmu-miR-212-3p	2.10777708505069	0.0175251379328613	1	227	T6Bwt_dox_vs_no_dox	MEFs	GACUGUU	1735.41666666667
ACUCAGU	mmu-miR-201	-0.429355069557174	0.333832423081034	1	76	T6Bwt_dox_vs_no_dox	MEFs	ACUGAGU	2.83333333333333
AUGCACC	mmu-miR-500/mmu-miR-501-3p	2.23084527445094	0.0128456898963977	1	123	T6Bwt_dox_vs_no_dox	MEFs	GGUGCAU	4196.5
CAGUCCA	mmu-miR-455	1.23634883417626	0.108164463107105	1	171	T6Bwt_dox_vs_no_dox	MEFs	UGGACUG	478.166666666667
AGGACAC	mmu-miR-1197	2.02021367323727	0.0216806143006362	1	103	T6Bwt_dox_vs_no_dox	MEFs	GUGUCCU	92.9166666666667
CAGCAGG	mmu-miR-214/mmu-miR-761	4.01157448467977	3.01575704243934e-05	0.0158930396136553	364	T6Bwt_dox_vs_no_dox	MEFs	CCUGCUG	5434.33333333333
CCAGCAU	mmu-miR-338-3p	3.99114012265887	3.28782063610413e-05	0.0172610583395467	139	T6Bwt_dox_vs_no_dox	MEFs	AUGCUGG	18.6666666666667
GAUCUAG	mmu-miR-344/mmu-miR-344c	1.55219060067119	0.0603083122250755	1	28	T6Bwt_dox_vs_no_dox	MEFs	CUAGAUC	388.916666666667
GCACUGA	mmu-miR-713	2.89233443924802	0.00191195329881636	0.858467031168547	191	T6Bwt_dox_vs_no_dox	MEFs	UCAGUGC	0
GGACGAG	mmu-miR-1947	2.70815329704384	0.00338293813240287	1	4	T6Bwt_dox_vs_no_dox	MEFs	CUCGUCC	8.91666666666667
GGGACGA	mmu-miR-1963	0.921310380952143	0.178444201418099	1	3	T6Bwt_dox_vs_no_dox	MEFs	UCGUCCC	0
UGCAAGG	mmu-miR-1931	1.98587281549069	0.0235237239583234	1	150	T6Bwt_dox_vs_no_dox	MEFs	CCUUGCA	12.9166666666667
AGUCUUA	mmu-miR-1191	1.38589678215023	0.0828892117720386	1	79	T6Bwt_dox_vs_no_dox	MEFs	UAAGACU	164.666666666667
AACUGCA	mmu-miR-883a-3p/mmu-miR-883b-3p	1.47579640455518	0.0699992781280688	1	205	T6Bwt_dox_vs_no_dox	MEFs	UGCAGUU	0.416666666666667
ACUCCAU	mmu-miR-880	1.91503069158308	0.0277442948144248	1	74	T6Bwt_dox_vs_no_dox	MEFs	AUGGAGU	0.5
GCAGCAG	mmu-miR-1906	3.35947903069902	0.000390447886584238	0.190148120766524	444	T6Bwt_dox_vs_no_dox	MEFs	CUGCUGC	0.416666666666667
UCUCGCU	mmu-miR-720	0.608667691284791	0.271372363222034	1	7	T6Bwt_dox_vs_no_dox	MEFs	AGCGAGA	0.166666666666667
AGGUUAC	mmu-miR-872	1.96918411282285	0.0244659762950875	1	62	T6Bwt_dox_vs_no_dox	MEFs	GUAACCU	7891.08333333333
CCUUCAU	mmu-miR-205	3.69977337940747	0.000107896037802934	0.0552427713551024	241	T6Bwt_dox_vs_no_dox	MEFs	AUGAAGG	7.41666666666667
GAGUAUU	mmu-miR-496	1.38418461712192	0.0831509661711728	1	71	T6Bwt_dox_vs_no_dox	MEFs	AAUACUC	420.666666666667
UAGUUGU	mmu-miR-669c	0.722560067465547	0.234975104547241	1	68	T6Bwt_dox_vs_no_dox	MEFs	ACAACUA	553.833333333333
UUAGGCA	mmu-miR-1948	2.2366845623887	0.0126534818386209	1	151	T6Bwt_dox_vs_no_dox	MEFs	UGCCUAA	9.33333333333333
CCUCCAU	mmu-miR-1930	3.71968997514546	9.97337340956828e-05	0.0511634055910853	90	T6Bwt_dox_vs_no_dox	MEFs	AUGGAGG	101.333333333333
AAACCUU	mmu-miR-703	2.66831902657356	0.00381159173070418	1	211	T6Bwt_dox_vs_no_dox	MEFs	AAGGUUU	0.0833333333333333
AACUGAC	mmu-miR-1936	3.47317279201108	0.000257172050218915	0.127300164858363	88	T6Bwt_dox_vs_no_dox	MEFs	GUCAGUU	0.25
CUUCUCC	mmu-miR-207	2.25477073140746	0.012073861660332	1	124	T6Bwt_dox_vs_no_dox	MEFs	GGAGAAG	1.16666666666667
GCAUUGU	mmu-miR-669g	0.862474835619885	0.194213137463942	1	116	T6Bwt_dox_vs_no_dox	MEFs	ACAAUGC	1.58333333333333
CGCAGGC	mmu-miR-688	-1.44349268048358	0.074440866458799	1	7	T6Bwt_dox_vs_no_dox	MEFs	GCCUGCG	1.33333333333333
ACUGAGA	mmu-miR-883b-5p	4.5325118076847	2.91432084461953e-06	0.00158830486031764	133	T6Bwt_dox_vs_no_dox	MEFs	UCUCAGU	0.166666666666667
UCAUAGA	mmu-miR-376b	1.83879402468711	0.03297274373438	1	111	T6Bwt_dox_vs_no_dox	MEFs	UCUAUGA	3487.16666666667
AUCACUA	mmu-miR-34b-3p	0.143064643768603	0.443119563919624	1	74	T6Bwt_dox_vs_no_dox	MEFs	UAGUGAU	781.583333333333
CCUGCUG	mmu-miR-370	1.91294550884694	0.0278775143617522	1	167	T6Bwt_dox_vs_no_dox	MEFs	CAGCAGG	1118
AUGACAC	mmu-miR-425/mmu-miR-489	0.935201148238077	0.174842323448391	1	107	T6Bwt_dox_vs_no_dox	MEFs	GUGUCAU	4527.33333333333
AUGUGGG	mmu-miR-299	0.968621519779514	0.16636703113476	1	56	T6Bwt_dox_vs_no_dox	MEFs	CCCACAU	2313.75
CACUGCC	mmu-miR-324-3p	1.73715744814152	0.0411796917229236	1	139	T6Bwt_dox_vs_no_dox	MEFs	GGCAGUG	2566.33333333333
AGGUUAU	mmu-miR-154	1.84543936153054	0.0324868258845781	1	73	T6Bwt_dox_vs_no_dox	MEFs	AUAACCU	682
GGGAAAG	mmu-miR-1953	2.6557675471718	0.00395640686691257	1	168	T6Bwt_dox_vs_no_dox	MEFs	CUUUCCC	18.5833333333333
GUAACAG	mmu-miR-194	2.95730667330308	0.00155169645029128	0.707573581332825	217	T6Bwt_dox_vs_no_dox	MEFs	CUGUUAC	2574.75
UCAGACA	mmu-miR-717	0.224454949410934	0.411201658878446	1	144	T6Bwt_dox_vs_no_dox	MEFs	UGUCUGA	0
AAUCUAC	mmu-miR-1196	0.515106380333187	0.303239342220783	1	129	T6Bwt_dox_vs_no_dox	MEFs	GUAGAUU	1.83333333333333
AGUAGAC	mmu-miR-411	1.77059038205324	0.0383144212478232	1	45	T6Bwt_dox_vs_no_dox	MEFs	GUCUACU	13991.5
ACUGGCC	mmu-miR-193/mmu-miR-193b	3.63129904700688	0.00014099909535644	0.0712045431550023	123	T6Bwt_dox_vs_no_dox	MEFs	GGCCAGU	4546.25
AGUCAUG	mmu-miR-707	2.94321275535987	0.00162412551530518	0.735728858433245	89	T6Bwt_dox_vs_no_dox	MEFs	CAUGACU	0
GAGGGGC	mmu-miR-423-5p	1.22860795164547	0.109609416361678	1	78	T6Bwt_dox_vs_no_dox	MEFs	GCCCCUC	1307.25
UUGGGAA	mmu-miR-450b-3p	0.131297461079533	0.44777000008531	1	133	T6Bwt_dox_vs_no_dox	MEFs	UUCCCAA	448.541666666667
UUUGGGG	mmu-miR-1892	1.14741725159624	0.125604607283286	1	98	T6Bwt_dox_vs_no_dox	MEFs	CCCCAAA	0.291666666666667
AGUGCUU	mmu-miR-302c	8.30774407111739	4.87693071132831e-17	2.9798046646216e-14	311	T6Bwt_dox_vs_no_dox	MEFs	AAGCACU	0
GGUCAAG	mmu-miR-1898	1.1412259926824	0.126887945183568	1	95	T6Bwt_dox_vs_no_dox	MEFs	CUUGACC	0
UGUGCGG	mmu-miR-147	1.19026188060457	0.116971739135019	1	12	T6Bwt_dox_vs_no_dox	MEFs	CCGCACA	200
UGUGCGU	mmu-miR-210	1.8598705938653	0.0314519183233918	1	12	T6Bwt_dox_vs_no_dox	MEFs	ACGCACA	10951.0833333333
CUCCAUU	mmu-miR-136	3.60756599593629	0.000154541467559555	0.0777343581824561	125	T6Bwt_dox_vs_no_dox	MEFs	AAUGGAG	3969
GGUGGGA	mmu-miR-1938	1.99572964903928	0.0229816790013517	1	89	T6Bwt_dox_vs_no_dox	MEFs	UCCCACC	6
GUCUUGU	mmu-miR-669e	0.87926497695208	0.189628810422918	1	76	T6Bwt_dox_vs_no_dox	MEFs	ACAAGAC	51.75
GGCAGAG	mmu-miR-1935	1.80881008409127	0.0352402565610391	1	252	T6Bwt_dox_vs_no_dox	MEFs	CUCUGCC	0.5
CAAGGGA	mmu-miR-1894-3p	2.25665774321678	0.0120147346104362	1	76	T6Bwt_dox_vs_no_dox	MEFs	UCCCUUG	0
GAUGUGU	mmu-miR-466b-5p/mmu-miR-466c-5p	0.867618713033477	0.19280154936184	1	53	T6Bwt_dox_vs_no_dox	MEFs	ACACAUC	348.928333333333
AUGUAGU	mmu-miR-380-3p	2.18327564979996	0.014507758319341	1	76	T6Bwt_dox_vs_no_dox	MEFs	ACUACAU	1381.16666666667
GUUCAGA	mmu-miR-743b-5p	2.86552631313919	0.00208158336284746	0.932549346555662	145	T6Bwt_dox_vs_no_dox	MEFs	UCUGAAC	11.25
CAAGUGC	mmu-miR-105	5.24526877013192	7.80273330231424e-08	4.44755798231912e-05	187	T6Bwt_dox_vs_no_dox	MEFs	GCACUUG	0.0833333333333333
GAAACAU	mmu-miR-494	3.22160539561102	0.000637372839899768	0.30338947179229	262	T6Bwt_dox_vs_no_dox	MEFs	AUGUUUC	1460.75
GACCCUG	mmu-miR-504	1.47405792732024	0.0702329975627996	1	98	T6Bwt_dox_vs_no_dox	MEFs	CAGGGUC	0
GUUGUGU	mmu-miR-669a-5p/mmu-miR-669f-5p/mmu-miR-669l	0.682552799177274	0.247444734287122	1	60	T6Bwt_dox_vs_no_dox	MEFs	ACACAAC	173.494166666667
AUACCUC	mmu-miR-875-5p	0.937393436895909	0.174278107842483	1	57	T6Bwt_dox_vs_no_dox	MEFs	GAGGUAU	0
CAACUCG	mmu-miR-1897-3p	0.902702088456993	0.183342013873056	1	21	T6Bwt_dox_vs_no_dox	MEFs	CGAGUUG	0.0833333333333333
CUGAACU	mmu-miR-345-3p	2.14315773129305	0.0160502175347039	1	111	T6Bwt_dox_vs_no_dox	MEFs	AGUUCAG	1621.91666666667
GUCACUC	mmu-miR-668	2.0751959735916	0.0189841878273292	1	83	T6Bwt_dox_vs_no_dox	MEFs	GAGUGAC	141.583333333333
UUGAACC	mmu-miR-434-3p	-0.328825953659964	0.371143622394588	1	83	T6Bwt_dox_vs_no_dox	MEFs	GGUUCAA	3866.75
UAUAAUA	mmu-miR-374	3.26034180167733	0.000556390121909176	0.267623648638314	390	T6Bwt_dox_vs_no_dox	MEFs	UAUUAUA	6597.25
AUCCUUU	mmu-miR-501-5p	2.25360998030218	0.0121103574606728	1	119	T6Bwt_dox_vs_no_dox	MEFs	AAAGGAU	420.666666666667
GGAGGCC	mmu-miR-764-3p	0.657368092791243	0.255472131337119	1	82	T6Bwt_dox_vs_no_dox	MEFs	GGCCUCC	0.166666666666667
GAUAGAC	mmu-miR-463	0.464322577300107	0.321208325349272	1	28	T6Bwt_dox_vs_no_dox	MEFs	GUCUAUC	0.0833333333333333
GUCAGUU	mmu-miR-223	2.54763450406494	0.00542280173072567	1	168	T6Bwt_dox_vs_no_dox	MEFs	AACUGAC	7.83333333333333
UUGUUCG	mmu-miR-375	1.92458532959975	0.027140628095704	1	118	T6Bwt_dox_vs_no_dox	MEFs	CGAACAA	3.5
CAGUAAC	mmu-miR-802	1.6021209155515	0.0545644368637174	1	162	T6Bwt_dox_vs_no_dox	MEFs	GUUACUG	0.166666666666667
CUUCUUC	mmu-miR-1903	2.03781683877398	0.020784126863791	1	148	T6Bwt_dox_vs_no_dox	MEFs	GAAGAAG	0.333333333333333
CCAGGAG	mmu-miR-665	1.28933131406717	0.0986414645038829	1	152	T6Bwt_dox_vs_no_dox	MEFs	CUCCUGG	1468.5
UCCUAUG	mmu-miR-202-5p	3.14554325514016	0.000828893392833718	0.387093214453346	113	T6Bwt_dox_vs_no_dox	MEFs	CAUAGGA	0.916666666666667
AAUGUUG	mmu-miR-409-3p	-0.859604317114573	0.195003597229804	1	140	T6Bwt_dox_vs_no_dox	MEFs	CAACAUU	5488
AUCUAGU	mmu-miR-878-5p	1.96255436549444	0.0248489888436244	1	59	T6Bwt_dox_vs_no_dox	MEFs	ACUAGAU	1.25
AGCUUAU	mmu-miR-21/mmu-miR-590-5p	6.18955329478556	3.0167475736223e-10	1.7859145635844e-07	166	T6Bwt_dox_vs_no_dox	MEFs	AUAAGCU	1760731.66666667
ACUCCAG	mmu-miR-509-5p	1.23951008842905	0.107578327510576	1	96	T6Bwt_dox_vs_no_dox	MEFs	CUGGAGU	21.5833333333333
UAUACCA	mmu-miR-1949	1.27880650418503	0.100482601467319	1	72	T6Bwt_dox_vs_no_dox	MEFs	UGGUAUA	43.6666666666667
GGUUGCC	mmu-miR-453	0.0259221926740925	0.489659699399417	1	35	T6Bwt_dox_vs_no_dox	MEFs	GGCAACC	0
GAGAUGA	mmu-miR-143	5.17012486415587	1.16968816450211e-07	6.63213189272697e-05	185	T6Bwt_dox_vs_no_dox	MEFs	UCAUCUC	315535.458333333
GGGGUCC	mmu-miR-615-5p	-0.951325831490043	0.170719498952037	1	58	T6Bwt_dox_vs_no_dox	MEFs	GGACCCC	275.583333333333
AUGUGUG	mmu-miR-1187/mmu-miR-466a-5p	2.39036166607314	0.00841589432117821	1	95	T6Bwt_dox_vs_no_dox	MEFs	CACACAU	91.1225
AAGGGUC	mmu-miR-540-5p	0.36258927562212	0.358455861336392	1	42	T6Bwt_dox_vs_no_dox	MEFs	GACCCUU	138.916666666667
GGUAGAC	mmu-miR-379/mmu-miR-1193-5p	4.08636356614393	2.19093481043063e-05	0.0115681357990737	54	T6Bwt_dox_vs_no_dox	MEFs	GUCUACC	13506.8333333333
AUGACUG	mmu-miR-468	-0.307531143693035	0.379219560773634	1	65	T6Bwt_dox_vs_no_dox	MEFs	CAGUCAU	0
ACCCGUA	mmu-miR-99a/mmu-miR-100/mmu-miR-99b	-0.294517782007081	0.384181138787294	1	32	T6Bwt_dox_vs_no_dox	MEFs	UACGGGU	173970.081666667
AACACUG	mmu-miR-141/mmu-miR-200a	5.32776203174645	4.97151377938518e-08	2.84370588180832e-05	457	T6Bwt_dox_vs_no_dox	MEFs	CAGUGUU	20
CAGGUGA	mmu-miR-125a-3p	1.76544701604179	0.0387443337738467	1	85	T6Bwt_dox_vs_no_dox	MEFs	UCACCUG	1000.33333333333
GCAGAGG	mmu-miR-298	0.552416577276982	0.290331487776209	1	192	T6Bwt_dox_vs_no_dox	MEFs	CCUCUGC	204.083333333333
GGAUUUC	mmu-miR-876-5p	3.04425275227826	0.00116629538721985	0.53649587812113	100	T6Bwt_dox_vs_no_dox	MEFs	GAAAUCC	23.3333333333333
AGGGAUU	mmu-miR-541	1.39923274418251	0.0808716002128858	1	58	T6Bwt_dox_vs_no_dox	MEFs	AAUCCCU	11093.3333333333
GACCUAC	mmu-miR-1839-3p	2.42208226172982	0.00771592840133464	1	40	T6Bwt_dox_vs_no_dox	MEFs	GUAGGUC	122.583333333333
AGAUGGA	mmu-miR-1969	0.529592556930747	0.298197228003276	1	89	T6Bwt_dox_vs_no_dox	MEFs	UCCAUCU	10.1666666666667
GUGUCAC	mmu-miR-1970	1.52058274247076	0.0641822901250431	1	76	T6Bwt_dox_vs_no_dox	MEFs	GUGACAC	1.16666666666667
GACAUGU	mmu-miR-704	1.69628885624046	0.0449155949235323	1	92	T6Bwt_dox_vs_no_dox	MEFs	ACAUGUC	7.83333333333333
GACGAGG	mmu-miR-714	1.52448895748298	0.0636933066213367	1	6	T6Bwt_dox_vs_no_dox	MEFs	CCUCGUC	2.08333333333333
UCAGCUC	mmu-miR-337-3p	1.32220137446704	0.0930505517617691	1	115	T6Bwt_dox_vs_no_dox	MEFs	GAGCUGA	603.083333333333
AACGGAA	mmu-miR-191	-1.08795916655325	0.138306567174593	1	38	T6Bwt_dox_vs_no_dox	MEFs	UUCCGUU	27214.0833333333
GUGACUG	mmu-miR-134	3.03501761350108	0.00120260819983991	0.551997163726517	69	T6Bwt_dox_vs_no_dox	MEFs	CAGUCAC	5345.25
CAGGACC	mmu-miR-1933-3p	0.536770542945215	0.295713060755013	1	59	T6Bwt_dox_vs_no_dox	MEFs	GGUCCUG	9.91666666666667
CCCCGAG	mmu-miR-1895	0.31842374262472	0.375081765394335	1	9	T6Bwt_dox_vs_no_dox	MEFs	CUCGGGG	0.416666666666667
AUCAGGG	mmu-miR-465a-3p	-0.679456227533693	0.248424416783628	1	38	T6Bwt_dox_vs_no_dox	MEFs	CCCUGAU	2.83333333333333
GGGGUGC	mmu-miR-342-5p	-0.616129303036879	0.268904591761294	1	45	T6Bwt_dox_vs_no_dox	MEFs	GCACCCC	131.083333333333
UGUAUGU	mmu-miR-297b-5p/mmu-miR-297a/mmu-miR-297c	2.44305973966759	0.00728166318202798	1	77	T6Bwt_dox_vs_no_dox	MEFs	ACAUACA	153.7575
CACCCUA	mmu-miR-1982.2	2.08369374278998	0.0185940168798188	1	36	T6Bwt_dox_vs_no_dox	MEFs	UAGGGUG	12.5
CGUGUGC	mmu-miR-696	0.297636954047473	0.382990133430664	1	5	T6Bwt_dox_vs_no_dox	MEFs	GCACACG	0
UAGACUG	mmu-miR-151-3p	0.302750203072603	0.381040117772258	1	59	T6Bwt_dox_vs_no_dox	MEFs	CAGUCUA	15651.25
GGACCCG	mmu-miR-711	1.97175346700944	0.0243188783746014	1	23	T6Bwt_dox_vs_no_dox	MEFs	CGGGUCC	0.583333333333333
GAUUGGG	mmu-miR-695	1.59044320489066	0.0558674690615669	1	55	T6Bwt_dox_vs_no_dox	MEFs	CCCAAUC	0
UGUAUGC	mmu-miR-675-3p	0.399226139149181	0.344863292318379	1	56	T6Bwt_dox_vs_no_dox	MEFs	GCAUACA	11.25
GCGGGGC	mmu-miR-744	-0.88606191259756	0.187792082779849	1	14	T6Bwt_dox_vs_no_dox	MEFs	GCCCCGC	9384.83333333333
UGCAUGG	mmu-miR-669h-5p	-0.712887302700049	0.237957748419742	1	103	T6Bwt_dox_vs_no_dox	MEFs	CCAUGCA	6.33333333333333
GGUAAGC	mmu-miR-654-5p	1.68512449894134	0.0459822769315933	1	48	T6Bwt_dox_vs_no_dox	MEFs	GCUUACC	1.5
AUCCUUG	mmu-miR-362-5p	2.30324817580319	0.0106324418285249	1	72	T6Bwt_dox_vs_no_dox	MEFs	CAAGGAU	1808.75
AUCCCUU	mmu-miR-188-5p	1.50217644696479	0.0665257729485669	1	101	T6Bwt_dox_vs_no_dox	MEFs	AAGGGAU	508.583333333333
GGAGACG	mmu-miR-139-3p	-0.54275863602112	0.293647998213969	1	30	T6Bwt_dox_vs_no_dox	MEFs	CGUCUCC	2.25
GGGCCCC	mmu-miR-296-5p	-0.606265678951994	0.272169172671408	1	71	T6Bwt_dox_vs_no_dox	MEFs	GGGGCCC	1259.41666666667
GGUGGUC	mmu-miR-323-5p	0.345552286167158	0.364839604707506	1	56	T6Bwt_dox_vs_no_dox	MEFs	GACCACC	22.4166666666667
AGGGUUG	mmu-miR-296-3p	-1.3956598412346	0.0814084764505998	1	24	T6Bwt_dox_vs_no_dox	MEFs	CAACCCU	4915.25
GAAGGUC	mmu-miR-493	1.09877734030613	0.135932599152938	1	57	T6Bwt_dox_vs_no_dox	MEFs	GACCUUC	98.1666666666667
AAUGAGU	mmu-miR-1194	1.19744083625826	0.115567387442659	1	99	T6Bwt_dox_vs_no_dox	MEFs	ACUCAUU	0.25
GAGAGAU	mmu-miR-741	-0.161408918844486	0.435885671278514	1	67	T6Bwt_dox_vs_no_dox	MEFs	AUCUCUC	1.5
CUGACCC	mmu-miR-345-5p	0.138120267619799	0.445072684025506	1	89	T6Bwt_dox_vs_no_dox	MEFs	GGGUCAG	1440.58333333333
CUUCGCG	mmu-miR-1945	-2.21494046649171	0.0133820755365226	1	2	T6Bwt_dox_vs_no_dox	MEFs	CGCGAAG	59.6666666666667
AACCGUU	mmu-miR-451	-0.0850904678115766	0.466094734203726	1	9	T6Bwt_dox_vs_no_dox	MEFs	AACGGUU	13.4166666666667
CGUACCG	mmu-miR-126-3p	1.85314245703728	0.0319309713914372	1	19	T6Bwt_dox_vs_no_dox	MEFs	CGGUACG	1186.91666666667
GCGGGCA	mmu-miR-666-5p	0.258300111331357	0.39808765017497	1	10	T6Bwt_dox_vs_no_dox	MEFs	UGCCCGC	413.625
AGCCUCG	mmu-miR-681	-1.91194978440482	0.0279413176118357	1	13	T6Bwt_dox_vs_no_dox	MEFs	CGAGGCU	0
GGUGCGG	mmu-miR-675-5p	2.50935636888991	0.00604756963364056	1	5	T6Bwt_dox_vs_no_dox	MEFs	CCGCACC	10.0833333333333
CCGGGCA	mmu-miR-1946b	-1.08662596395532	0.138601072832299	1	11	T6Bwt_dox_vs_no_dox	MEFs	UGCCCGG	1.08333333333333
AUGCCUU	mmu-miR-532-5p	2.45491799430333	0.00704583652996809	1	106	T6Bwt_dox_vs_no_dox	MEFs	AAGGCAU	5273.16666666667
GAUCGAC	mmu-miR-369-5p	0.900378879670358	0.183959328243867	1	4	T6Bwt_dox_vs_no_dox	MEFs	GUCGAUC	836.666666666667
ACCAGUC	mmu-miR-1905	0.54117031336866	0.294195098678122	1	68	T6Bwt_dox_vs_no_dox	MEFs	GACUGGU	0.0833333333333333
AUCGUAC	mmu-miR-487b	0.316274621881881	0.375897036026927	1	10	T6Bwt_dox_vs_no_dox	MEFs	GUACGAU	503.5
ACGUCAU	mmu-miR-598	0.582472485139162	0.28012423482145	1	10	T6Bwt_dox_vs_no_dox	MEFs	AUGACGU	511.5
CGGAUCC	mmu-miR-127	-1.11194983715327	0.133079859476182	1	11	T6Bwt_dox_vs_no_dox	MEFs	GGAUCCG	40957.8333333333
CUCGACU	mmu-miR-434-5p	-0.498037204009362	0.309228909893634	1	1	T6Bwt_dox_vs_no_dox	MEFs	AGUCGAG	6147.20833333333
UUCCGCC	mmu-miR-718	-0.155892547577762	0.438058859831023	1	6	T6Bwt_dox_vs_no_dox	MEFs	GGCGGAA	0.25
CGUCCUG	mmu-miR-676	-0.0242728841553988	0.49031747103308	1	7	T6Bwt_dox_vs_no_dox	MEFs	CAGGACG	1409.41666666667
UCGUAGA	mmu-miR-376a	0.0529331628043938	0.478892580664349	1	1	T6Bwt_dox_vs_no_dox	MEFs	UCUACGA	3314.66666666667
CGUGUGU	mmu-miR-466f	-2.79762567172362	0.00257398680384476	1	9	T6Bwt_dox_vs_no_dox	MEFs	ACACACG	6.21333333333333
GCCGGGC	mmu-miR-1946a	-0.73240401534729	0.231961004349356	1	10	T6Bwt_dox_vs_no_dox	MEFs	GCCCGGC	4
GUGCCGC	mmu-miR-293	-0.813879961611486	0.207856860602531	1	4	T6Bwt_dox_vs_no_dox	MEFs	GCGGCAC	1.5
ACGUGUG	mmu-miR-466f-5p	-0.212575556815839	0.415829019261723	1	4	T6Bwt_dox_vs_no_dox	MEFs	CACACGU	18.64
ACGCUCA	mmu-miR-574-3p	1.52771255827677	0.0632919603583945	1	5	T6Bwt_dox_vs_no_dox	MEFs	UGAGCGU	1675.04166666667
CCGGGGC	mmu-miR-673-3p	0.832150623060046	0.202661965319117	1	9	T6Bwt_dox_vs_no_dox	MEFs	GCCCCGG	108.916666666667
UCUCGGU	mmu-miR-678	-0.0969882543311696	0.461367861079012	1	3	T6Bwt_dox_vs_no_dox	MEFs	ACCGAGA	0.166666666666667
CGAGGAG	mmu-miR-151-5p	0.580683837603402	0.280726778312047	1	5	T6Bwt_dox_vs_no_dox	MEFs	CUCCUCG	20096.8333333333
CCGAGCC	mmu-miR-615-3p	-0.31295955007213	0.377155696934799	1	3	T6Bwt_dox_vs_no_dox	MEFs	GGCUCGG	6351.75
CCGUCUC	mmu-miR-340-3p	-0.389611769059961	0.348411824054001	1	6	T6Bwt_dox_vs_no_dox	MEFs	GAGACGG	160.75
CGUGUCU	mmu-miR-187	1.7367158882564	0.0412186659521834	1	5	T6Bwt_dox_vs_no_dox	MEFs	AGACACG	43.6666666666667
UUGCGGA	mmu-miR-1932	1.36574473010902	0.0860095497423336	1	2	T6Bwt_dox_vs_no_dox	MEFs	UCCGCAA	1.5
GAGCGCC	mmu-miR-339-3p	-0.334919356457053	0.368842960095086	1	6	T6Bwt_dox_vs_no_dox	MEFs	GGCGCUC	297.583333333333
GCUCGGU	mmu-miR-423-3p	-1.13566812354814	0.128047743101604	1	5	T6Bwt_dox_vs_no_dox	MEFs	ACCGAGC	13196.8333333333
CGACCCA	mmu-miR-551b	-3.67542482946342	0.000118726975536258	0.0604320305479552	4	T6Bwt_dox_vs_no_dox	MEFs	UGGGUCG	0.0833333333333333
AUGGCGC	mmu-miR-652	2.84394624099757	0.00222792826302763	0.99588393357335	2	T6Bwt_dox_vs_no_dox	MEFs	GCGCCAU	7189.66666666667
CCGGUUC	mmu-miR-671-3p	1.24344000198406	0.106852868639977	1	4	T6Bwt_dox_vs_no_dox	MEFs	GAACCGG	542.416666666667
GCGAUGG	mmu-miR-1899	1.95410395899697	0.0253444619981213	1	4	T6Bwt_dox_vs_no_dox	MEFs	CCAUCGC	0
AGACGGG	mmu-miR-483	0.356925842139974	0.360573661483175	1	3	T6Bwt_dox_vs_no_dox	MEFs	CCCGUCU	0.0833333333333333
AGCCGGG	mmu-miR-1965	-1.86002324155807	0.0314411188993273	1	3	T6Bwt_dox_vs_no_dox	MEFs	CCCGGCU	38.0833333333333
GCGCGGG	mmu-miR-1893	-2.47812515819202	0.00660374033345136	1	4	T6Bwt_dox_vs_no_dox	MEFs	CCCGCGC	0.833333333333333
UAGCCGC	mmu-miR-701	-1.28819011426899	0.098839896183176	1	2	T6Bwt_dox_vs_no_dox	MEFs	GCGGCUA	170
AACGGCG	mmu-miR-337-5p	0.44641183305215	0.327649893398362	1	2	T6Bwt_dox_vs_no_dox	MEFs	CGCCGUU	848.583333333333
ACGCGGG	mmu-miR-700	1.29886409404343	0.0969952869429642	1	1	T6Bwt_dox_vs_no_dox	MEFs	CCCGCGU	540.25
UCCCACA	mmu-miR-188-3p	-1.80973799848167	0.0351682134469257	1	168	T6Bmut_dox_vs_no_dox	MEFs	UGUGGGA	56.4166666666667
UCUCCCC	mmu-miR-1894-5p	-1.23190755473165	0.108991809509547	1	119	T6Bmut_dox_vs_no_dox	MEFs	GGGGAGA	0.25
AAAGUGC	mmu-miR-106a/mmu-miR-17/mmu-miR-106b/mmu-miR-20a/mmu-miR-93/mmu-miR-20b	0.77959859854703	0.217813590544609	1	801	T6Bmut_dox_vs_no_dox	MEFs	GCACUUU	226447.914166667
AAGUGCU	mmu-miR-302a/mmu-miR-291a-3p/mmu-miR-294/mmu-miR-295/mmu-miR-302d/mmu-miR-302b	-0.298497444415257	0.38266176316419	1	475	T6Bmut_dox_vs_no_dox	MEFs	AGCACUU	0.5
AAGUUGU	mmu-miR-382	-0.308849926977707	0.378717844115334	1	97	T6Bmut_dox_vs_no_dox	MEFs	ACAACUU	4453.54166666667
ACACACC	mmu-miR-329/mmu-miR-362-3p	0.596872277661617	0.275296328640181	1	165	T6Bmut_dox_vs_no_dox	MEFs	GGUGUGU	4772.5
ACAUUCA	mmu-miR-181a/mmu-miR-181c/mmu-miR-181d/mmu-miR-181b	-0.776629449055768	0.21868871090275	1	692	T6Bmut_dox_vs_no_dox	MEFs	UGAAUGU	27230.1666666667
ACCUCUG	mmu-miR-1927	0.655264282352897	0.256148806518586	1	75	T6Bmut_dox_vs_no_dox	MEFs	CAGAGGU	5.25
AGUGCUG	mmu-miR-1186	0.669626383708219	0.251547995386414	1	192	T6Bmut_dox_vs_no_dox	MEFs	CAGCACU	0.5
AUACAUA	mmu-miR-297b-3p/mmu-miR-467g/mmu-miR-466a-3p/mmu-miR-466d-3p	-1.6914624446048	0.0453742573382073	1	570	T6Bmut_dox_vs_no_dox	MEFs	UAUGUAU	379.299166666667
CCCCUGG	mmu-miR-331-3p	0.484535750063178	0.314002849526059	1	96	T6Bmut_dox_vs_no_dox	MEFs	CCAGGGG	2866
CUCCACC	mmu-miR-1952	-1.78728430837049	0.036945774437112	1	100	T6Bmut_dox_vs_no_dox	MEFs	GGUGGAG	0.0833333333333333
CUGGUCC	mmu-miR-1934	-1.43289153312983	0.0759444186528075	1	154	T6Bmut_dox_vs_no_dox	MEFs	GGACCAG	20.0833333333333
CUUUGGU	mmu-miR-9	-0.523925720573159	0.300165102265206	1	815	T6Bmut_dox_vs_no_dox	MEFs	ACCAAAG	790.416666666667
GAGGCAG	mmu-miR-709	-0.990211729875559	0.161035320195427	1	303	T6Bmut_dox_vs_no_dox	MEFs	CUGCCUC	0.0833333333333333
GCACCAC	mmu-miR-770-5p	-1.46588852526561	0.0713393292653698	1	168	T6Bmut_dox_vs_no_dox	MEFs	GUGGUGC	136.166666666667
GCAGCUG	mmu-miR-1968	-1.04168413752266	0.148779072825242	1	260	T6Bmut_dox_vs_no_dox	MEFs	CAGCUGC	5.25
GCCGCCC	mmu-miR-1900	-0.851633080124298	0.197208886669226	1	4	T6Bmut_dox_vs_no_dox	MEFs	GGGCGGC	0
GGCAGUG	mmu-miR-34a/mmu-miR-449a/mmu-miR-449c/mmu-miR-34b-5p/mmu-miR-34c/mmu-miR-449b	1.43361257325814	0.0758414267308209	1	358	T6Bmut_dox_vs_no_dox	MEFs	CACUGCC	23102.8333333333
GGCAUCU	mmu-miR-680	-2.16687378499614	0.0151222396754421	1	133	T6Bmut_dox_vs_no_dox	MEFs	AGAUGCC	0.166666666666667
GGGCUGG	mmu-miR-762	-2.32174213756344	0.0101234122809755	1	178	T6Bmut_dox_vs_no_dox	MEFs	CCAGCCC	2.16666666666667
GUCCAGG	mmu-miR-1956	-1.85135636205703	0.0320591512974432	1	150	T6Bmut_dox_vs_no_dox	MEFs	CCUGGAC	0.75
GUGGGGA	mmu-miR-491	-0.774753802459682	0.219242576132458	1	72	T6Bmut_dox_vs_no_dox	MEFs	UCCCCAC	54.25
UACAUAC	mmu-miR-466b-3p	-0.0463848874772157	0.481501740797012	1	383	T6Bmut_dox_vs_no_dox	MEFs	GUAUGUA	232.8025
UGUGCUU	mmu-miR-218	0.909720793334519	0.181484887703652	1	548	T6Bmut_dox_vs_no_dox	MEFs	AAGCACA	7240
UUAUUGA	mmu-miR-325	0.919015591108465	0.179043708639228	1	1281	T6Bmut_dox_vs_no_dox	MEFs	UCAAUAA	0.0833333333333333
UUGGCAA	mmu-miR-182	-1.90968921384914	0.0280866202854207	1	685	T6Bmut_dox_vs_no_dox	MEFs	UUGCCAA	17850.5833333333
UUGGCAC	mmu-miR-96	-2.36283452432818	0.0090678826944088	1	670	T6Bmut_dox_vs_no_dox	MEFs	GUGCCAA	7144.33333333333
AACAUUC	mmu-miR-543	0.0211401485129196	0.491566929080405	1	364	T6Bmut_dox_vs_no_dox	MEFs	GAAUGUU	3079.75
AGUGGUU	mmu-miR-876-3p/mmu-miR-140	-0.0984903077193371	0.460771483930428	1	182	T6Bmut_dox_vs_no_dox	MEFs	AACCACU	10460.6666666667
CCAGUGU	mmu-miR-199a-5p	-0.21877955018823	0.413410888785426	1	293	T6Bmut_dox_vs_no_dox	MEFs	ACACUGG	125842.624166667
CCCUGAG	mmu-miR-125a-5p/mmu-miR-351/mmu-miR-125b-5p	-0.339606528227534	0.367076430615291	1	511	T6Bmut_dox_vs_no_dox	MEFs	CUCAGGG	995043.333333333
CCCUGUC	mmu-miR-339-5p	-1.37998129882253	0.0837962014663961	1	100	T6Bmut_dox_vs_no_dox	MEFs	GACAGGG	1738.41666666667
GAGAACU	mmu-miR-146a/mmu-miR-146b	-0.88983413285604	0.186777477903899	1	115	T6Bmut_dox_vs_no_dox	MEFs	AGUUCUC	2350
GAGGUAG	mmu-miR-1961/mmu-let-7g/mmu-miR-98/mmu-let-7a/mmu-let-7b/mmu-let-7i/mmu-let-7d/mmu-let-7f/mmu-let-7e/mmu-let-7c	-0.570009319578826	0.28433568855895	1	706	T6Bmut_dox_vs_no_dox	MEFs	CUACCUC	1324004.25
GAGGUAU	mmu-miR-202-3p	-0.094118034489865	0.462507697260424	1	499	T6Bmut_dox_vs_no_dox	MEFs	AUACCUC	0.25
GAUCAGA	mmu-miR-383	0.226295710032942	0.410485717378333	1	84	T6Bmut_dox_vs_no_dox	MEFs	UCUGAUC	7.5
UCCCUGA	mmu-miR-670	-0.180001079556095	0.428575860339385	1	411	T6Bmut_dox_vs_no_dox	MEFs	UCAGGGA	1.08333333333333
AUUUAGA	mmu-miR-465a-5p/mmu-miR-465b-5p/mmu-miR-465c-5p	-1.24298950946918	0.106935849623615	1	254	T6Bmut_dox_vs_no_dox	MEFs	UCUAAAU	2.08333333333333
GGUGUGA	mmu-miR-1188	-1.92325226224179	0.0272241883307995	1	74	T6Bmut_dox_vs_no_dox	MEFs	UCACACC	82.4166666666667
UCUCUGA	mmu-miR-1896	-2.0504437185937	0.0201605753241982	1	204	T6Bmut_dox_vs_no_dox	MEFs	UCAGAGA	0.25
GGUCAGA	mmu-miR-540-3p	0.502944074871746	0.30750179605405	1	145	T6Bmut_dox_vs_no_dox	MEFs	UCUGACC	1610.83333333333
AACAAAC	mmu-miR-1192/mmu-miR-495	-2.44350512453186	0.00727268151270658	1	488	T6Bmut_dox_vs_no_dox	MEFs	GUUUGUU	454.666666666667
AAGGCAC	mmu-miR-124	-0.440133914566091	0.329920059953791	1	1113	T6Bmut_dox_vs_no_dox	MEFs	GUGCCUU	1.33333333333333
AAUACUG	mmu-miR-200b/mmu-miR-429/mmu-miR-200c	-1.50971846533629	0.0655576387475087	1	669	T6Bmut_dox_vs_no_dox	MEFs	CAGUAUU	27.6666666666667
ACAAUAU	mmu-miR-338-5p	-0.472514548398279	0.318279779948916	1	514	T6Bmut_dox_vs_no_dox	MEFs	AUAUUGU	2.33333333333333
ACAGUAC	mmu-miR-101a/mmu-miR-101b	-0.652438068408884	0.257059306485171	1	465	T6Bmut_dox_vs_no_dox	MEFs	GUACUGU	29621.4166666667
ACAGUAU	mmu-miR-144	-2.16925761717632	0.0150315655053688	1	496	T6Bmut_dox_vs_no_dox	MEFs	AUACUGU	3
ACCCUGU	mmu-miR-10a/mmu-miR-10b	-0.128647368789071	0.448818341416712	1	167	T6Bmut_dox_vs_no_dox	MEFs	ACAGGGU	34769.3333333333
ACUGUGU	mmu-miR-881	-0.637527208982551	0.261890746305275	1	115	T6Bmut_dox_vs_no_dox	MEFs	ACACAGU	85.75
AGGAAAG	mmu-miR-1958	-1.43468511865492	0.0756884233467628	1	275	T6Bmut_dox_vs_no_dox	MEFs	CUUUCCU	1.66666666666667
AUACACA	mmu-miR-466f-3p	0.768536827330609	0.221084160083148	1	501	T6Bmut_dox_vs_no_dox	MEFs	UGUGUAU	135.369166666667
AUAUAAC	mmu-miR-344d/mmu-miR-410/mmu-miR-344e	-1.34825746559826	0.0887877937386776	1	390	T6Bmut_dox_vs_no_dox	MEFs	GUUAUAU	2652.25
AUUGCAC	mmu-miR-25/mmu-miR-92a/mmu-miR-363-3p/mmu-miR-367/mmu-miR-32/mmu-miR-92b	0.879788324381255	0.189486995415495	1	565	T6Bmut_dox_vs_no_dox	MEFs	GUGCAAU	159569.625
CACAGUG	mmu-miR-128	-0.862373996102407	0.194240872705069	1	672	T6Bmut_dox_vs_no_dox	MEFs	CACUGUG	1710.58333333333
CAGUGCA	mmu-miR-148a/mmu-miR-148b/mmu-miR-152	-0.0214168956458798	0.491456547940206	1	409	T6Bmut_dox_vs_no_dox	MEFs	UGCACUG	44087.9966666667
CAGUGCU	mmu-miR-1960	-0.0960142132829142	0.461754642074735	1	307	T6Bmut_dox_vs_no_dox	MEFs	AGCACUG	3
CUACAGU	mmu-miR-139-5p	-0.692136552245797	0.244425789469235	1	199	T6Bmut_dox_vs_no_dox	MEFs	ACUGUAG	35.0833333333333
GCUACAU	mmu-miR-222/mmu-miR-1928/mmu-miR-221	1.20502588528458	0.114096654596285	1	232	T6Bmut_dox_vs_no_dox	MEFs	AUGUAGC	177921.333333333
GGUUACC	mmu-miR-409-5p	-1.16670312636023	0.121665139920842	1	70	T6Bmut_dox_vs_no_dox	MEFs	GGUAACC	2029.75
GUAAACA	mmu-miR-30b/mmu-miR-30a/mmu-miR-30e/mmu-miR-384-5p/mmu-miR-30c/mmu-miR-30d	-1.21704089906513	0.111794327595311	1	915	T6Bmut_dox_vs_no_dox	MEFs	UGUUUAC	153283.166666667
GUGUGUG	mmu-miR-466k/mmu-miR-466i-5p/mmu-miR-466d-5p	0.502699802302785	0.307587674356106	1	260	T6Bmut_dox_vs_no_dox	MEFs	CACACAC	41.5558333333333
UAGAGGA	mmu-miR-877	-0.223196901531922	0.411691131670781	1	65	T6Bmut_dox_vs_no_dox	MEFs	UCCUCUA	37.6666666666667
UCAAGUA	mmu-miR-26b/mmu-miR-26a	0.332700414578888	0.369680218285755	1	599	T6Bmut_dox_vs_no_dox	MEFs	UACUUGA	116093.166666667
UCACAGC	mmu-miR-673-5p	-2.24238291371287	0.0124683175665329	1	568	T6Bmut_dox_vs_no_dox	MEFs	GCUGUGA	853.916666666667
UCACAGU	mmu-miR-27a/mmu-miR-27b	-1.3861802007938	0.0828459428245171	1	766	T6Bmut_dox_vs_no_dox	MEFs	ACUGUGA	197900.388333333
UCAGUGA	mmu-miR-677	1.11678929413275	0.132042213712396	1	211	T6Bmut_dox_vs_no_dox	MEFs	UCACUGA	34.75
UGGUGGC	mmu-miR-546	0.0271745126576084	0.489160272074983	1	104	T6Bmut_dox_vs_no_dox	MEFs	GCCACCA	0.166666666666667
UGCAGUC	mmu-miR-682	-1.07775436038498	0.14057169599756	1	125	T6Bmut_dox_vs_no_dox	MEFs	GACUGCA	0.0833333333333333
ACAUCCU	mmu-miR-697	0.264870668338348	0.395554547406028	1	120	T6Bmut_dox_vs_no_dox	MEFs	AGGAUGU	0.0833333333333333
CUUGUGU	mmu-miR-669d	0.0974040053967605	0.461202782004766	1	75	T6Bmut_dox_vs_no_dox	MEFs	ACACAAG	347
UAUUGCU	mmu-miR-137	2.41798701293435	0.00780331690945192	1	695	T6Bmut_dox_vs_no_dox	MEFs	AGCAAUA	0.583333333333333
AAUGCCC	mmu-miR-365	0.754930996288918	0.225145193213189	1	162	T6Bmut_dox_vs_no_dox	MEFs	GGGCAUU	3570.91666666667
ACAUAGA	mmu-miR-376c	0.412003444745052	0.340168449184685	1	142	T6Bmut_dox_vs_no_dox	MEFs	UCUAUGU	972
AGGGAGC	mmu-miR-1966	-2.14978247263071	0.0157862126196313	1	59	T6Bmut_dox_vs_no_dox	MEFs	GCUCCCU	0.875
AGGGAGG	mmu-miR-1943	0.3912018242071	0.347824030009301	1	123	T6Bmut_dox_vs_no_dox	MEFs	CCUCCCU	135.666666666667
AUAAAGU	mmu-miR-142-5p	-1.61581462424986	0.053067199359843	1	456	T6Bmut_dox_vs_no_dox	MEFs	ACUUUAU	4.75
CAGUAGU	mmu-miR-199a-3p	-0.430063820448031	0.333574608549046	1	262	T6Bmut_dox_vs_no_dox	MEFs	ACUACUG	216768.666666667
CUCCCUU	mmu-miR-343	-1.79683902490195	0.0361805894945484	1	146	T6Bmut_dox_vs_no_dox	MEFs	AAGGGAG	0.25
GUAGUGU	mmu-miR-142-3p	-0.642813928807798	0.260172421984991	1	216	T6Bmut_dox_vs_no_dox	MEFs	ACACUAC	9.66666666666667
GUGAGUU	mmu-miR-804	-1.3523351804934	0.0881340574819411	1	56	T6Bmut_dox_vs_no_dox	MEFs	AACUCAC	0
UGUUGAA	mmu-miR-653	-1.92416898304274	0.0271667028023288	1	100	T6Bmut_dox_vs_no_dox	MEFs	UUCAACA	0.416666666666667
UUUUCAU	mmu-miR-335-3p	-3.03660036584649	0.00119631219792806	0.747695123705035	383	T6Bmut_dox_vs_no_dox	MEFs	AUGAAAA	96.25
AUACAAG	mmu-miR-539-3p/mmu-miR-381	0.0681149660169255	0.472847058433923	1	538	T6Bmut_dox_vs_no_dox	MEFs	CUUGUAU	2647.83333333333
CAGCUGA	mmu-miR-1190	-0.175969841819291	0.430158817721868	1	179	T6Bmut_dox_vs_no_dox	MEFs	UCAGCUG	0.75
CAGCUGG	mmu-miR-763	-0.9850460269326	0.16230073152294	1	226	T6Bmut_dox_vs_no_dox	MEFs	CCAGCUG	0
CCUGUAC	mmu-miR-3107	-2.16956513474892	0.0150199025121695	1	72	T6Bmut_dox_vs_no_dox	MEFs	GUACAGG	861.5
GCUGAGA	mmu-miR-883a-5p	-1.29855272590804	0.0970487352856255	1	156	T6Bmut_dox_vs_no_dox	MEFs	UCUCAGC	0.333333333333333
UAUCCUG	mmu-miR-687	-1.01613727261256	0.154782011010476	1	64	T6Bmut_dox_vs_no_dox	MEFs	CAGGAUA	0.25
AAAGCUG	mmu-miR-320	0.0798449273579314	0.468180295750043	1	400	T6Bmut_dox_vs_no_dox	MEFs	CAGCUUU	11524.0833333333
UAUACAC	mmu-miR-467f	-1.95892105863395	0.0250610162066115	1	470	T6Bmut_dox_vs_no_dox	MEFs	GUGUAUA	0.0383333333333333
AAAGACA	mmu-miR-743a/mmu-miR-743b-3p	-0.207059681734156	0.41798162450871	1	370	T6Bmut_dox_vs_no_dox	MEFs	UGUCUUU	2.08333333333333
AGCACCA	mmu-miR-29a/mmu-miR-29b/mmu-miR-29c	-1.14357103654433	0.126400789505858	1	695	T6Bmut_dox_vs_no_dox	MEFs	UGGUGCU	685750.249166667
AGGUAGU	mmu-miR-196b/mmu-miR-196a	0.316100215196001	0.375963221703332	1	174	T6Bmut_dox_vs_no_dox	MEFs	ACUACCU	10433.4166666667
CAAGAGC	mmu-miR-335-5p	-0.092780892091581	0.46303881571205	1	122	T6Bmut_dox_vs_no_dox	MEFs	GCUCUUG	192.416666666667
CAAGUCU	mmu-miR-710	-0.0668406250972887	0.473354290778101	1	189	T6Bmut_dox_vs_no_dox	MEFs	AGACUUG	0
CAGAUGU	mmu-miR-1942	-1.58068597185588	0.0569749287242475	1	139	T6Bmut_dox_vs_no_dox	MEFs	ACAUCUG	0.0833333333333333
CUGGCUC	mmu-miR-149	0.0325295984718883	0.487024856173749	1	206	T6Bmut_dox_vs_no_dox	MEFs	GAGCCAG	1923.58333333333
GGAGAGA	mmu-miR-185/mmu-miR-882/mmu-miR-3473	0.300077163441258	0.382059148955408	1	119	T6Bmut_dox_vs_no_dox	MEFs	UCUCUCC	2204.66666666667
GGCUCAG	mmu-miR-24	-1.53266188977914	0.0626795918972076	1	342	T6Bmut_dox_vs_no_dox	MEFs	CUGAGCC	155882.833333333
GUGACAG	mmu-miR-542-3p	-0.654513054977839	0.256390659551143	1	121	T6Bmut_dox_vs_no_dox	MEFs	CUGUCAC	1151.83333333333
GUUUUCC	mmu-miR-684	0.103270803245211	0.458874023666738	1	165	T6Bmut_dox_vs_no_dox	MEFs	GGAAAAC	0
UCACAUU	mmu-miR-23a/mmu-miR-23b	-0.135498814951343	0.446108750574502	1	643	T6Bmut_dox_vs_no_dox	MEFs	AAUGUGA	108212.5
UGCAUUG	mmu-miR-33	1.11648868388843	0.132106505680343	1	207	T6Bmut_dox_vs_no_dox	MEFs	CAAUGCA	1945.33333333333
AGUGGUA	mmu-miR-1957	-0.0150596411625605	0.493992299497301	1	92	T6Bmut_dox_vs_no_dox	MEFs	UACCACU	0
UAGUGGA	mmu-miR-1951	-1.4938622874466	0.067605808614957	1	55	T6Bmut_dox_vs_no_dox	MEFs	UCCACUA	3.08333333333333
UCCCUUU	mmu-miR-211/mmu-miR-204	0.436706984951182	0.331161931471701	1	338	T6Bmut_dox_vs_no_dox	MEFs	AAAGGGA	2.16666666666667
AAUCUCA	mmu-miR-216a	-1.94303248330864	0.0260061168296147	1	123	T6Bmut_dox_vs_no_dox	MEFs	UGAGAUU	0.166666666666667
CUGAAAA	mmu-miR-875-3p	-0.0441010446016803	0.482411930062359	1	497	T6Bmut_dox_vs_no_dox	MEFs	UUUUCAG	2.25
CUGAGUC	mmu-miR-1199	-0.116253598340484	0.453725779671479	1	109	T6Bmut_dox_vs_no_dox	MEFs	GACUCAG	0.666666666666667
GAGAAAC	mmu-miR-706	0.35377895554959	0.361752272950106	1	267	T6Bmut_dox_vs_no_dox	MEFs	GUUUCUC	1.125
CACUGAG	mmu-miR-674/mmu-miR-3473d	1.05057950897527	0.14672587814212	1	178	T6Bmut_dox_vs_no_dox	MEFs	CUCAGUG	1388.75
CUGGACU	mmu-miR-378	-1.16342285210975	0.122328991137725	1	78	T6Bmut_dox_vs_no_dox	MEFs	AGUCCAG	3523.83333333333
GUGGGAG	mmu-miR-705	-1.53583291872707	0.0622896819184502	1	74	T6Bmut_dox_vs_no_dox	MEFs	CUCCCAC	0.25
UCCAGUU	mmu-miR-145	-0.928523136868797	0.176568135923834	1	407	T6Bmut_dox_vs_no_dox	MEFs	AACUGGA	34853.3333333333
UUCCUGA	mmu-miR-691	-0.437002750986264	0.331054676480389	1	359	T6Bmut_dox_vs_no_dox	MEFs	UCAGGAA	0
GGAAUGU	mmu-miR-1a/mmu-miR-206	0.830218444713276	0.203207644311345	1	495	T6Bmut_dox_vs_no_dox	MEFs	ACAUUCC	2956.5275
GUGCUCA	mmu-miR-764-5p	1.42214796796851	0.077491650028523	1	146	T6Bmut_dox_vs_no_dox	MEFs	UGAGCAC	0
UUGGUCC	mmu-miR-133a/mmu-miR-133b	-0.108703855405532	0.456718691904124	1	399	T6Bmut_dox_vs_no_dox	MEFs	GGACCAA	6.66666666666667
UAAAGGC	mmu-miR-1971/mmu-miR-1981	-0.270059669197807	0.393557174474438	1	220	T6Bmut_dox_vs_no_dox	MEFs	GCCUUUA	257.208333333333
AAAGAAU	mmu-miR-186	-1.46273330285787	0.0717701848576	1	401	T6Bmut_dox_vs_no_dox	MEFs	AUUCUUU	19566
AGCAGCG	mmu-miR-503	-0.257862620149221	0.398256467128743	1	225	T6Bmut_dox_vs_no_dox	MEFs	CGCUGCU	4374.33333333333
GAGGCUG	mmu-miR-1962/mmu-miR-485	0.608452352731516	0.271443749114937	1	155	T6Bmut_dox_vs_no_dox	MEFs	CAGCCUC	480.833333333333
AAGGCUA	mmu-miR-690	-0.238824615848422	0.405620790890008	1	290	T6Bmut_dox_vs_no_dox	MEFs	UAGCCUU	4.16666666666667
ACAGUUG	mmu-miR-582-5p	-2.01261995881774	0.0220773128137145	1	210	T6Bmut_dox_vs_no_dox	MEFs	CAACUGU	503.833333333333
ACAUUAC	mmu-miR-323-3p	-0.773090433242405	0.219734431237746	1	304	T6Bmut_dox_vs_no_dox	MEFs	GUAAUGU	518.083333333333
AGCCACA	mmu-miR-693-5p	0.367321117708657	0.35668975187223	1	151	T6Bmut_dox_vs_no_dox	MEFs	UGUGGCU	0.916666666666667
AUUAUUA	mmu-miR-126-5p	2.99920652429503	0.00135341878408866	0.843179902487236	302	T6Bmut_dox_vs_no_dox	MEFs	UAAUAAU	317.25
CUGCUGU	mmu-miR-683	-0.211707038845892	0.416167798183981	1	157	T6Bmut_dox_vs_no_dox	MEFs	ACAGCAG	0
UCCUUCA	mmu-miR-712	0.494827838434329	0.310360825921572	1	289	T6Bmut_dox_vs_no_dox	MEFs	UGAAGGA	0
UCUCGGC	mmu-miR-719	-1.13258843128565	0.128693564544442	1	4	T6Bmut_dox_vs_no_dox	MEFs	GCCGAGA	0.0833333333333333
UCUUGGA	mmu-miR-470	-0.559267325113703	0.287989645779821	1	138	T6Bmut_dox_vs_no_dox	MEFs	UCCAAGA	0.833333333333333
UGAAAGG	mmu-miR-488	-0.57498173949038	0.28265182341148	1	172	T6Bmut_dox_vs_no_dox	MEFs	CCUUUCA	0
UUUGCAG	mmu-miR-450b-5p	-1.61271648030631	0.0534030592084403	1	260	T6Bmut_dox_vs_no_dox	MEFs	CUGCAAA	761.583333333333
UUUUUGC	mmu-miR-129-5p	-0.45658230219246	0.323985651103163	1	280	T6Bmut_dox_vs_no_dox	MEFs	GCAAAAA	10400.5
AGUGCAA	mmu-miR-130a/mmu-miR-721/mmu-miR-301a/mmu-miR-130b/mmu-miR-301b	1.24013215945206	0.107463257867516	1	522	T6Bmut_dox_vs_no_dox	MEFs	UUGCACU	45271.5
GCUGGUG	mmu-miR-138	-0.43497615038226	0.331789869456066	1	336	T6Bmut_dox_vs_no_dox	MEFs	CACCAGC	638.666666666667
GUGCAAA	mmu-miR-19a/mmu-miR-19b	0.462712807018044	0.321785118564083	1	714	T6Bmut_dox_vs_no_dox	MEFs	UUUGCAC	74291.0833333333
ACUGCAU	mmu-miR-217	-0.551351319140636	0.290696432506439	1	175	T6Bmut_dox_vs_no_dox	MEFs	AUGCAGU	24.0833333333333
GACACCU	mmu-miR-667	-0.804457156729923	0.210566501492964	1	59	T6Bmut_dox_vs_no_dox	MEFs	AGGUGUC	433.916666666667
UGCAUAG	mmu-miR-153	-0.0561588763679089	0.477607620668553	1	476	T6Bmut_dox_vs_no_dox	MEFs	CUAUGCA	0.166666666666667
AAUCUCU	mmu-miR-216b	-2.46039974272614	0.00693911706117141	1	130	T6Bmut_dox_vs_no_dox	MEFs	AGAGAUU	0.416666666666667
CUCAAAC	mmu-miR-290-5p/mmu-miR-292-5p	0.276788034303997	0.390971434799902	1	165	T6Bmut_dox_vs_no_dox	MEFs	GUUUGAG	1.70833333333333
GCAUAUA	mmu-miR-669i/mmu-miR-669j	-0.265663866188252	0.395249047104117	1	258	T6Bmut_dox_vs_no_dox	MEFs	UAUAUGC	1.33333333333333
UGGUUGA	mmu-miR-380-5p	-1.87601508662861	0.0303266041538734	1	78	T6Bmut_dox_vs_no_dox	MEFs	UCAACCA	297.916666666667
AAGUGCC	mmu-miR-467a/mmu-miR-290-3p/mmu-miR-292-3p	2.03468637511662	0.0209412200000482	1	229	T6Bmut_dox_vs_no_dox	MEFs	GGCACUU	1146.925
AAUUUUA	mmu-miR-590-3p	1.08942102093421	0.137984132854811	1	560	T6Bmut_dox_vs_no_dox	MEFs	UAAAAUU	0.333333333333333
AUGGCUU	mmu-miR-135a/mmu-miR-135b	-0.0417013607550632	0.483368384590384	1	457	T6Bmut_dox_vs_no_dox	MEFs	AAGCCAU	2815.91666666667
CAUGACA	mmu-miR-878-3p	0.168947598655921	0.432918929488564	1	99	T6Bmut_dox_vs_no_dox	MEFs	UGUCAUG	95.7916666666667
CUCUGGG	mmu-miR-330/mmu-miR-326	-1.23363657794328	0.108669178282757	1	193	T6Bmut_dox_vs_no_dox	MEFs	CCCAGAG	228.833333333333
UAAUGCU	mmu-miR-155	-0.757786186593927	0.224289496557935	1	216	T6Bmut_dox_vs_no_dox	MEFs	AGCAUUA	3336.75
UAUAAAG	mmu-miR-340-5p	0.0500369468781516	0.480046472916484	1	817	T6Bmut_dox_vs_no_dox	MEFs	CUUUAUA	1931.25
UUCCUAG	mmu-miR-384-3p	-0.626491769239789	0.265496216933578	1	138	T6Bmut_dox_vs_no_dox	MEFs	CUAGGAA	0.666666666666667
AAGUCAC	mmu-miR-224	-1.54590659632915	0.0610635636293704	1	201	T6Bmut_dox_vs_no_dox	MEFs	GUGACUU	2901.33333333333
AUCUUAG	mmu-miR-1941-3p	-0.768766503410947	0.221015968663558	1	63	T6Bmut_dox_vs_no_dox	MEFs	CUAAGAU	11.75
AUGCAUA	mmu-miR-669h-3p/mmu-miR-669k	2.17590366676626	0.0147812322877418	1	255	T6Bmut_dox_vs_no_dox	MEFs	UAUGCAU	0.583333333333333
CUCACCC	mmu-miR-1982.1	1.13975392249753	0.127194417613596	1	69	T6Bmut_dox_vs_no_dox	MEFs	GGGUGAG	12.5
CUGCAUC	mmu-miR-1950	1.29731587381916	0.0972612624005461	1	147	T6Bmut_dox_vs_no_dox	MEFs	GAUGCAG	10.5833333333333
CUGUUGA	mmu-miR-582-3p	-1.11584948928175	0.132243282933444	1	74	T6Bmut_dox_vs_no_dox	MEFs	UCAACAG	72.1666666666667
CUUGAGG	mmu-miR-327	-1.89089450862548	0.0293192138162722	1	86	T6Bmut_dox_vs_no_dox	MEFs	CCUCAAG	0.0833333333333333
GCAUCCC	mmu-miR-324-5p	-0.151953074880892	0.439611973291864	1	70	T6Bmut_dox_vs_no_dox	MEFs	GGGAUGC	2715
UAAGUGC	mmu-miR-467b	0.693677968922182	0.2439420926172	1	183	T6Bmut_dox_vs_no_dox	MEFs	GCACUUA	1146.63333333333
UAAGUGU	mmu-miR-467e/mmu-miR-467h	-0.332088720275041	0.369911133598752	1	125	T6Bmut_dox_vs_no_dox	MEFs	ACACUUA	391.958333333333
UACAGAC	mmu-miR-466g	0.322724238909758	0.373452046789606	1	281	T6Bmut_dox_vs_no_dox	MEFs	GUCUGUA	40.375
UCACCUG	mmu-miR-412-3p/mmu-miR-1983	-0.27230820738791	0.392692523006756	1	111	T6Bmut_dox_vs_no_dox	MEFs	CAGGUGA	7788.58333333333
UCAUGAU	mmu-miR-433	0.815904026731804	0.207277514457002	1	176	T6Bmut_dox_vs_no_dox	MEFs	AUCAUGA	2887.83333333333
UGAAAAU	mmu-miR-694	0.217296053105916	0.413988816390998	1	624	T6Bmut_dox_vs_no_dox	MEFs	AUUUUCA	37.75
UUGCUUC	mmu-miR-686	0.171663428757445	0.431851069283902	1	212	T6Bmut_dox_vs_no_dox	MEFs	GAAGCAA	0
UUGGUAC	mmu-miR-547	-1.81217978117172	0.0349792110598547	1	280	T6Bmut_dox_vs_no_dox	MEFs	GUACCAA	22.25
UUUGGAU	mmu-miR-1897-5p	-1.80378054867387	0.0356328581633789	1	177	T6Bmut_dox_vs_no_dox	MEFs	AUCCAAA	0
GGAAGCC	mmu-miR-671-5p	-1.49795391718549	0.0670726118912286	1	162	T6Bmut_dox_vs_no_dox	MEFs	GGCUUCC	415.916666666667
UGCCCUG	mmu-miR-874	-1.35526352284372	0.0876668061891107	1	129	T6Bmut_dox_vs_no_dox	MEFs	CAGGGCA	23.9166666666667
AAGUGCA	mmu-miR-291b-3p	0.457923196610145	0.323503810425428	1	527	T6Bmut_dox_vs_no_dox	MEFs	UGCACUU	0.5
AUCAAAG	mmu-miR-291a-5p/mmu-miR-291b-5p	0.762993499835061	0.222733636221801	1	408	T6Bmut_dox_vs_no_dox	MEFs	CUUUGAU	0.916666666666667
AUGGCAC	mmu-miR-183	-0.869046599171378	0.192410821602648	1	267	T6Bmut_dox_vs_no_dox	MEFs	GUGCCAU	10308.75
CUCACAC	mmu-miR-342-3p	-0.402978749998081	0.343481928599892	1	147	T6Bmut_dox_vs_no_dox	MEFs	GUGUGAG	2677.83333333333
GAGGUUG	mmu-miR-672	1.25367208867929	0.10498060847979	1	106	T6Bmut_dox_vs_no_dox	MEFs	CAACCUC	7.66666666666667
UAAGACG	mmu-miR-208b/mmu-miR-208a-3p	-0.521765558778373	0.300916786208116	1	107	T6Bmut_dox_vs_no_dox	MEFs	CGUCUUA	0.0833333333333333
UAAGACU	mmu-miR-499	-1.1266084829005	0.12995402548205	1	176	T6Bmut_dox_vs_no_dox	MEFs	AGUCUUA	7.66666666666667
UCACAAA	mmu-miR-350	-1.27241428733486	0.101612980187107	1	530	T6Bmut_dox_vs_no_dox	MEFs	UUUGUGA	2949.08333333333
UCUAGGA	mmu-miR-1929	-0.710114747096773	0.238816491021815	1	87	T6Bmut_dox_vs_no_dox	MEFs	UCCUAGA	8.25
UUGUGAC	mmu-miR-758	-1.52064548804927	0.0641744125829602	1	119	T6Bmut_dox_vs_no_dox	MEFs	GUCACAA	95.8333333333333
UUGUGUC	mmu-miR-592	1.16910521220457	0.12118062209607	1	118	T6Bmut_dox_vs_no_dox	MEFs	GACACAA	1.58333333333333
UUUGUGU	mmu-miR-669n	-0.275104748602381	0.39161788171872	1	198	T6Bmut_dox_vs_no_dox	MEFs	ACACAAA	0.166666666666667
CAGCUUU	mmu-miR-693-3p	-1.44435227429147	0.074319954169476	1	283	T6Bmut_dox_vs_no_dox	MEFs	AAAGCUG	10.9166666666667
GUCUGCC	mmu-miR-346	1.03453462022071	0.15044315035743	1	72	T6Bmut_dox_vs_no_dox	MEFs	GGCAGAC	0.0833333333333333
GUCUUGC	mmu-miR-431	-0.12722318377203	0.449381878239235	1	76	T6Bmut_dox_vs_no_dox	MEFs	GCAAGAC	1913.5
GUUUUGU	mmu-miR-669b	-1.65467491071523	0.04899522949879	1	201	T6Bmut_dox_vs_no_dox	MEFs	ACAAAAC	146.1275
UAUCAGA	mmu-miR-361	-1.03165096901146	0.151117827102604	1	114	T6Bmut_dox_vs_no_dox	MEFs	UCUGAUA	7592.75
UGAAAUG	mmu-miR-203	0.948935369941665	0.171326741992571	1	436	T6Bmut_dox_vs_no_dox	MEFs	CAUUUCA	37.5
UGUAUAA	mmu-miR-568	-0.817308200296488	0.206876160844415	1	228	T6Bmut_dox_vs_no_dox	MEFs	UUAUACA	0
CAGGAAC	mmu-miR-873	-0.647552425854985	0.25863723795777	1	148	T6Bmut_dox_vs_no_dox	MEFs	GUUCCUG	438.833333333333
GAGGCUU	mmu-miR-879	0.275960342265891	0.391289263082468	1	90	T6Bmut_dox_vs_no_dox	MEFs	AAGCCUC	0.25
GUGGGCC	mmu-miR-770-3p	-0.294643526311367	0.384133104114534	1	43	T6Bmut_dox_vs_no_dox	MEFs	GGCCCAC	113.75
AAGGUGC	mmu-miR-18a/mmu-miR-18b	-0.614957004076522	0.269291557735618	1	144	T6Bmut_dox_vs_no_dox	MEFs	GCACCUU	14046.4166666667
AAGUGCG	mmu-miR-467c/mmu-miR-467d	0.225403026618569	0.410832878661704	1	114	T6Bmut_dox_vs_no_dox	MEFs	CGCACUU	685.290833333333
CUCCCAA	mmu-miR-150/mmu-miR-5127	-1.11459132656188	0.132512794411791	1	147	T6Bmut_dox_vs_no_dox	MEFs	UUGGGAG	12.5833333333333
CUCCCAC	mmu-miR-532-3p	-0.996222377225701	0.159571054560611	1	124	T6Bmut_dox_vs_no_dox	MEFs	GUGGGAG	1336.08333333333
GAGGAUC	mmu-miR-1967	-2.46993938545962	0.00675679739704513	1	47	T6Bmut_dox_vs_no_dox	MEFs	GAUCCUC	0.166666666666667
AGCAGCA	mmu-miR-497/mmu-miR-195/mmu-miR-15a/mmu-miR-16/mmu-miR-322/mmu-miR-1907/mmu-miR-15b	0.266119576044944	0.395073559469413	1	756	T6Bmut_dox_vs_no_dox	MEFs	UGCUGCU	84183.1666666667
AGGUAGA	mmu-miR-1839-5p	0.194346159668218	0.422952422201602	1	213	T6Bmut_dox_vs_no_dox	MEFs	UCUACCU	1793.58333333333
CAGAGUG	mmu-miR-759	-1.83656559389561	0.0331370252235236	1	85	T6Bmut_dox_vs_no_dox	MEFs	CACUCUG	0.75
CAGGCUC	mmu-miR-484	0.898078437538466	0.184571866836655	1	153	T6Bmut_dox_vs_no_dox	MEFs	GAGCCUG	12574.0833333333
CUGCAGA	mmu-miR-1954	-0.868666557580811	0.192514769135914	1	218	T6Bmut_dox_vs_no_dox	MEFs	UCUGCAG	1.58333333333333
GCAGCAU	mmu-miR-103/mmu-miR-107	3.02681487579814	0.00123572633493254	0.771093232997902	350	T6Bmut_dox_vs_no_dox	MEFs	AUGCUGC	69851.8333333333
GCUGCAG	mmu-miR-666-3p	-1.44736391681612	0.0738975130981852	1	204	T6Bmut_dox_vs_no_dox	MEFs	CUGCAGC	76.75
AGCUGCC	mmu-miR-22	0.556942296299125	0.288783427516923	1	263	T6Bmut_dox_vs_no_dox	MEFs	GGCAGCU	139803.75
AGGAGCU	mmu-miR-28/mmu-miR-708	-0.20096606067976	0.42036255614151	1	92	T6Bmut_dox_vs_no_dox	MEFs	AGCUCCU	12911.75
AUGCAAG	mmu-miR-300	1.86249620709484	0.0312665897895982	1	209	T6Bmut_dox_vs_no_dox	MEFs	CUUGCAU	10330.5141666667
GAGGUGC	mmu-miR-1902	-0.555566621648876	0.289253577353569	1	72	T6Bmut_dox_vs_no_dox	MEFs	GCACCUC	0
GAGUGUG	mmu-miR-574-5p	-0.752943894477072	0.225741814791497	1	70	T6Bmut_dox_vs_no_dox	MEFs	CACACUC	2027.125
GAGUUCG	mmu-miR-1195	-0.56384662709663	0.286429258056596	1	32	T6Bmut_dox_vs_no_dox	MEFs	CGAACUC	0.166666666666667
GAUAUGU	mmu-miR-190/mmu-miR-190b	-0.400990056459109	0.344213722405137	1	82	T6Bmut_dox_vs_no_dox	MEFs	ACAUAUC	970
GGACGGA	mmu-miR-184	0.224567839817112	0.411157742985776	1	12	T6Bmut_dox_vs_no_dox	MEFs	UCCGUCC	9.33333333333333
GGAGUGU	mmu-miR-122	0.825795023969028	0.204460188652179	1	99	T6Bmut_dox_vs_no_dox	MEFs	ACACUCC	35.1666666666667
GUCAUGG	mmu-miR-1933-5p	-0.219690781290316	0.413055992373476	1	62	T6Bmut_dox_vs_no_dox	MEFs	CCAUGAC	5.33333333333333
UAGGUAU	mmu-miR-331-5p	0.154940495937737	0.438434113992139	1	44	T6Bmut_dox_vs_no_dox	MEFs	AUACCUA	335.5
UCACACA	mmu-miR-377	-2.31197945812279	0.0103894076791988	1	285	T6Bmut_dox_vs_no_dox	MEFs	UGUGUGA	3407.58333333333
UGAGGAC	mmu-miR-1224	-0.68368594541974	0.247086750131283	1	64	T6Bmut_dox_vs_no_dox	MEFs	GUCCUCA	0.75
UGGCCCU	mmu-miR-328	-2.434972110813	0.00744646876326816	1	95	T6Bmut_dox_vs_no_dox	MEFs	AGGGCCA	1876.75
UUCUGCU	mmu-miR-1904	-0.350545262054264	0.362964764034394	1	222	T6Bmut_dox_vs_no_dox	MEFs	AGCAGAA	0
AAAGCCA	mmu-miR-742	-0.00671992305185669	0.497319158750207	1	363	T6Bmut_dox_vs_no_dox	MEFs	UGGCUUU	0.25
AUGUCUG	mmu-miR-654-3p	-0.117436312262614	0.453257155058971	1	74	T6Bmut_dox_vs_no_dox	MEFs	CAGACAU	0.916666666666667
GCCCACC	mmu-miR-702	-1.32529460462163	0.0925367289005063	1	81	T6Bmut_dox_vs_no_dox	MEFs	GGUGGGC	1.16666666666667
UGGAGGA	mmu-miR-1940	0.00856534705983848	0.49658296269349	1	91	T6Bmut_dox_vs_no_dox	MEFs	UCCUCCA	3.58333333333333
GAUUGAC	mmu-miR-509-3p	-1.77810481423211	0.0376933209601595	1	52	T6Bmut_dox_vs_no_dox	MEFs	GUCAAUC	1
UGACCUA	mmu-miR-192/mmu-miR-215	-0.205161733651275	0.418722882800422	1	77	T6Bmut_dox_vs_no_dox	MEFs	UAGGUCA	1614.58333333333
GGAAGAC	mmu-miR-7a/mmu-miR-7b	-1.13002141851333	0.129233599723328	1	254	T6Bmut_dox_vs_no_dox	MEFs	GUCUUCC	23388
AUUCUCG	mmu-miR-698	-0.182951985693915	0.427417846258751	1	46	T6Bmut_dox_vs_no_dox	MEFs	CGAGAAU	0.0833333333333333
AUAAUAC	mmu-miR-369-3p	-0.909119074261622	0.181643637576412	1	377	T6Bmut_dox_vs_no_dox	MEFs	GUAUUAU	2270.66666666667
GGCAAGA	mmu-miR-31	-0.817906574077096	0.206705268096948	1	208	T6Bmut_dox_vs_no_dox	MEFs	UCUUGCC	6233.5
GGGAGAU	mmu-miR-1941-5p	0.0131964146633051	0.494735545038276	1	64	T6Bmut_dox_vs_no_dox	MEFs	AUCUCCC	34.0833333333333
GUGUGCA	mmu-miR-466j/mmu-miR-466h-5p/mmu-miR-466m-5p	1.08364425356246	0.139261280743648	1	152	T6Bmut_dox_vs_no_dox	MEFs	UGCACAC	2.31666666666667
UCAACAG	mmu-miR-421	-1.9025449476454	0.0285499742612485	1	212	T6Bmut_dox_vs_no_dox	MEFs	CUGUUGA	833.75
UCUCUUU	mmu-miR-692	0.143049838020466	0.443125410425945	1	323	T6Bmut_dox_vs_no_dox	MEFs	AAAGAGA	0.25
AACAGUC	mmu-miR-132/mmu-miR-212-3p	-0.699026122785474	0.242267852842985	1	227	T6Bmut_dox_vs_no_dox	MEFs	GACUGUU	1735.41666666667
ACUCAGU	mmu-miR-201	-1.08408890431255	0.139162691000579	1	76	T6Bmut_dox_vs_no_dox	MEFs	ACUGAGU	2.83333333333333
AUGCACC	mmu-miR-500/mmu-miR-501-3p	0.709583439590778	0.23898124602714	1	123	T6Bmut_dox_vs_no_dox	MEFs	GGUGCAU	4196.5
CAGUCCA	mmu-miR-455	-1.32397891588029	0.0927550235630358	1	171	T6Bmut_dox_vs_no_dox	MEFs	UGGACUG	478.166666666667
AGGACAC	mmu-miR-1197	-1.38507369285108	0.0830149675203697	1	103	T6Bmut_dox_vs_no_dox	MEFs	GUGUCCU	92.9166666666667
CAGCAGG	mmu-miR-214/mmu-miR-761	-2.0644461821654	0.0194877157982237	1	364	T6Bmut_dox_vs_no_dox	MEFs	CCUGCUG	5434.33333333333
CCAGCAU	mmu-miR-338-3p	0.174432572282415	0.430762758856282	1	139	T6Bmut_dox_vs_no_dox	MEFs	AUGCUGG	18.6666666666667
GAUCUAG	mmu-miR-344/mmu-miR-344c	-0.907088142880027	0.182180093889989	1	28	T6Bmut_dox_vs_no_dox	MEFs	CUAGAUC	388.916666666667
GCACUGA	mmu-miR-713	-0.379897214518466	0.352010857551019	1	191	T6Bmut_dox_vs_no_dox	MEFs	UCAGUGC	0
GGACGAG	mmu-miR-1947	-1.31192540045	0.0947726531226287	1	4	T6Bmut_dox_vs_no_dox	MEFs	CUCGUCC	8.91666666666667
GGGACGA	mmu-miR-1963	-1.43465543399151	0.0756926548300678	1	3	T6Bmut_dox_vs_no_dox	MEFs	UCGUCCC	0
UGCAAGG	mmu-miR-1931	1.03050602887719	0.151386261798174	1	150	T6Bmut_dox_vs_no_dox	MEFs	CCUUGCA	12.9166666666667
AGUCUUA	mmu-miR-1191	-1.68952198277533	0.0455597213906962	1	79	T6Bmut_dox_vs_no_dox	MEFs	UAAGACU	164.666666666667
AACUGCA	mmu-miR-883a-3p/mmu-miR-883b-3p	-0.391093208112978	0.347864170391683	1	205	T6Bmut_dox_vs_no_dox	MEFs	UGCAGUU	0.416666666666667
ACUCCAU	mmu-miR-880	0.0560913527554311	0.477634516298114	1	74	T6Bmut_dox_vs_no_dox	MEFs	AUGGAGU	0.5
GCAGCAG	mmu-miR-1906	0.0532241942915223	0.478776639338125	1	444	T6Bmut_dox_vs_no_dox	MEFs	CUGCUGC	0.416666666666667
UCUCGCU	mmu-miR-720	0.0941184838773265	0.462507518773061	1	7	T6Bmut_dox_vs_no_dox	MEFs	AGCGAGA	0.166666666666667
AGGUUAC	mmu-miR-872	-1.73733691597143	0.0411638595591138	1	62	T6Bmut_dox_vs_no_dox	MEFs	GUAACCU	7891.08333333333
CCUUCAU	mmu-miR-205	-0.471979470445483	0.3184707211019	1	241	T6Bmut_dox_vs_no_dox	MEFs	AUGAAGG	7.41666666666667
GAGUAUU	mmu-miR-496	-0.970262071630433	0.165957938868248	1	71	T6Bmut_dox_vs_no_dox	MEFs	AAUACUC	420.666666666667
UAGUUGU	mmu-miR-669c	-0.99900462701886	0.1588962249212	1	68	T6Bmut_dox_vs_no_dox	MEFs	ACAACUA	553.833333333333
UUAGGCA	mmu-miR-1948	0.451918255839006	0.325663936167484	1	151	T6Bmut_dox_vs_no_dox	MEFs	UGCCUAA	9.33333333333333
CCUCCAU	mmu-miR-1930	0.817340060746733	0.206867059541908	1	90	T6Bmut_dox_vs_no_dox	MEFs	AUGGAGG	101.333333333333
AAACCUU	mmu-miR-703	-0.901172241391291	0.183748373755204	1	211	T6Bmut_dox_vs_no_dox	MEFs	AAGGUUU	0.0833333333333333
AACUGAC	mmu-miR-1936	0.626842120384553	0.265381365242171	1	88	T6Bmut_dox_vs_no_dox	MEFs	GUCAGUU	0.25
CUUCUCC	mmu-miR-207	0.893219607097201	0.185869790032822	1	124	T6Bmut_dox_vs_no_dox	MEFs	GGAGAAG	1.16666666666667
GCAUUGU	mmu-miR-669g	-0.172774637775851	0.431414286667298	1	116	T6Bmut_dox_vs_no_dox	MEFs	ACAAUGC	1.58333333333333
CGCAGGC	mmu-miR-688	-0.243401495681919	0.403847192629087	1	7	T6Bmut_dox_vs_no_dox	MEFs	GCCUGCG	1.33333333333333
ACUGAGA	mmu-miR-883b-5p	-0.727687592666686	0.233402423574917	1	133	T6Bmut_dox_vs_no_dox	MEFs	UCUCAGU	0.166666666666667
UCAUAGA	mmu-miR-376b	-1.24454866090553	0.106648850903922	1	111	T6Bmut_dox_vs_no_dox	MEFs	UCUAUGA	3487.16666666667
AUCACUA	mmu-miR-34b-3p	0.00336737223602325	0.498656615380018	1	74	T6Bmut_dox_vs_no_dox	MEFs	UAGUGAU	781.583333333333
CCUGCUG	mmu-miR-370	-0.733298908411458	0.231688070338219	1	167	T6Bmut_dox_vs_no_dox	MEFs	CAGCAGG	1118
AUGACAC	mmu-miR-425/mmu-miR-489	-0.198334602238983	0.421391640356466	1	107	T6Bmut_dox_vs_no_dox	MEFs	GUGUCAU	4527.33333333333
AUGUGGG	mmu-miR-299	0.255239980658901	0.399268876659731	1	56	T6Bmut_dox_vs_no_dox	MEFs	CCCACAU	2313.75
CACUGCC	mmu-miR-324-3p	-1.44164760605769	0.0747009056112163	1	139	T6Bmut_dox_vs_no_dox	MEFs	GGCAGUG	2566.33333333333
AGGUUAU	mmu-miR-154	-0.985356712794661	0.162224442206431	1	73	T6Bmut_dox_vs_no_dox	MEFs	AUAACCU	682
GGGAAAG	mmu-miR-1953	-0.599611977689607	0.274382431379511	1	168	T6Bmut_dox_vs_no_dox	MEFs	CUUUCCC	18.5833333333333
GUAACAG	mmu-miR-194	-2.07290638150151	0.0190904965137935	1	217	T6Bmut_dox_vs_no_dox	MEFs	CUGUUAC	2574.75
UCAGACA	mmu-miR-717	1.04264702550269	0.148555900551421	1	144	T6Bmut_dox_vs_no_dox	MEFs	UGUCUGA	0
AAUCUAC	mmu-miR-1196	0.288510422753264	0.386478026676193	1	129	T6Bmut_dox_vs_no_dox	MEFs	GUAGAUU	1.83333333333333
AGUAGAC	mmu-miR-411	-0.0559222891650657	0.477701857213162	1	45	T6Bmut_dox_vs_no_dox	MEFs	GUCUACU	13991.5
ACUGGCC	mmu-miR-193/mmu-miR-193b	1.54648581356985	0.0609936418107409	1	123	T6Bmut_dox_vs_no_dox	MEFs	GGCCAGU	4546.25
AGUCAUG	mmu-miR-707	0.983965661005511	0.162566198557938	1	89	T6Bmut_dox_vs_no_dox	MEFs	CAUGACU	0
GAGGGGC	mmu-miR-423-5p	0.195594558158217	0.422463759986196	1	78	T6Bmut_dox_vs_no_dox	MEFs	GCCCCUC	1307.25
UUGGGAA	mmu-miR-450b-3p	0.203013328631617	0.419562307198689	1	133	T6Bmut_dox_vs_no_dox	MEFs	UUCCCAA	448.541666666667
UUUGGGG	mmu-miR-1892	-2.10006579745073	0.0178615267542592	1	98	T6Bmut_dox_vs_no_dox	MEFs	CCCCAAA	0.291666666666667
AGUGCUU	mmu-miR-302c	0.848527399145324	0.198072160063074	1	311	T6Bmut_dox_vs_no_dox	MEFs	AAGCACU	0
GGUCAAG	mmu-miR-1898	2.06432675534664	0.0194933729441458	1	95	T6Bmut_dox_vs_no_dox	MEFs	CUUGACC	0
UGUGCGG	mmu-miR-147	0.576580196764735	0.282111540034793	1	12	T6Bmut_dox_vs_no_dox	MEFs	CCGCACA	200
UGUGCGU	mmu-miR-210	0.0773685771163603	0.469165168830464	1	12	T6Bmut_dox_vs_no_dox	MEFs	ACGCACA	10951.0833333333
CUCCAUU	mmu-miR-136	-1.01171202328523	0.155837882535368	1	125	T6Bmut_dox_vs_no_dox	MEFs	AAUGGAG	3969
GGUGGGA	mmu-miR-1938	-1.00895826356553	0.15649732541058	1	89	T6Bmut_dox_vs_no_dox	MEFs	UCCCACC	6
GUCUUGU	mmu-miR-669e	-0.820985865416916	0.205827159696888	1	76	T6Bmut_dox_vs_no_dox	MEFs	ACAAGAC	51.75
GGCAGAG	mmu-miR-1935	0.595610910393031	0.275717593160325	1	252	T6Bmut_dox_vs_no_dox	MEFs	CUCUGCC	0.5
CAAGGGA	mmu-miR-1894-3p	3.43829307422096	0.00029269687618226	0.183520941366277	76	T6Bmut_dox_vs_no_dox	MEFs	UCCCUUG	0
GAUGUGU	mmu-miR-466b-5p/mmu-miR-466c-5p	-1.41092268372345	0.0791337064020288	1	53	T6Bmut_dox_vs_no_dox	MEFs	ACACAUC	348.928333333333
AUGUAGU	mmu-miR-380-3p	-0.707680010755109	0.239571996738223	1	76	T6Bmut_dox_vs_no_dox	MEFs	ACUACAU	1381.16666666667
GUUCAGA	mmu-miR-743b-5p	0.180976138883969	0.428193152576138	1	145	T6Bmut_dox_vs_no_dox	MEFs	UCUGAAC	11.25
CAAGUGC	mmu-miR-105	-0.192708094309197	0.423593791968528	1	187	T6Bmut_dox_vs_no_dox	MEFs	GCACUUG	0.0833333333333333
GAAACAU	mmu-miR-494	-0.188646373557615	0.425184992233181	1	262	T6Bmut_dox_vs_no_dox	MEFs	AUGUUUC	1460.75
GACCCUG	mmu-miR-504	-0.874440742362836	0.190939138913271	1	98	T6Bmut_dox_vs_no_dox	MEFs	CAGGGUC	0
GUUGUGU	mmu-miR-669a-5p/mmu-miR-669f-5p/mmu-miR-669l	0.822538797777649	0.205385157418135	1	60	T6Bmut_dox_vs_no_dox	MEFs	ACACAAC	173.494166666667
AUACCUC	mmu-miR-875-5p	-0.609175435691087	0.271204080251896	1	57	T6Bmut_dox_vs_no_dox	MEFs	GAGGUAU	0
CAACUCG	mmu-miR-1897-3p	0.0507975744321734	0.479743411853201	1	21	T6Bmut_dox_vs_no_dox	MEFs	CGAGUUG	0.0833333333333333
CUGAACU	mmu-miR-345-3p	-0.500810529997025	0.308252237064267	1	111	T6Bmut_dox_vs_no_dox	MEFs	AGUUCAG	1621.91666666667
GUCACUC	mmu-miR-668	-2.02509427968332	0.0214288420923386	1	83	T6Bmut_dox_vs_no_dox	MEFs	GAGUGAC	141.583333333333
UUGAACC	mmu-miR-434-3p	-0.767096815441574	0.221511977601015	1	83	T6Bmut_dox_vs_no_dox	MEFs	GGUUCAA	3866.75
UAUAAUA	mmu-miR-374	-1.42127221393339	0.0776188190370742	1	390	T6Bmut_dox_vs_no_dox	MEFs	UAUUAUA	6597.25
AUCCUUU	mmu-miR-501-5p	0.619928443680415	0.267652449184182	1	119	T6Bmut_dox_vs_no_dox	MEFs	AAAGGAU	420.666666666667
GGAGGCC	mmu-miR-764-3p	-0.0816729555271485	0.4674533924278	1	82	T6Bmut_dox_vs_no_dox	MEFs	GGCCUCC	0.166666666666667
GAUAGAC	mmu-miR-463	-0.591457827403819	0.277106852040432	1	28	T6Bmut_dox_vs_no_dox	MEFs	GUCUAUC	0.0833333333333333
GUCAGUU	mmu-miR-223	-1.54416441749965	0.0612742532573539	1	168	T6Bmut_dox_vs_no_dox	MEFs	AACUGAC	7.83333333333333
UUGUUCG	mmu-miR-375	1.24507864839351	0.106551420886085	1	118	T6Bmut_dox_vs_no_dox	MEFs	CGAACAA	3.5
CAGUAAC	mmu-miR-802	-1.26068232019136	0.10371166313254	1	162	T6Bmut_dox_vs_no_dox	MEFs	GUUACUG	0.166666666666667
CUUCUUC	mmu-miR-1903	-1.86872438908705	0.0308305845163474	1	148	T6Bmut_dox_vs_no_dox	MEFs	GAAGAAG	0.333333333333333
CCAGGAG	mmu-miR-665	-1.27339383803942	0.101439161432352	1	152	T6Bmut_dox_vs_no_dox	MEFs	CUCCUGG	1468.5
UCCUAUG	mmu-miR-202-5p	-1.51043729992421	0.0654659384923959	1	113	T6Bmut_dox_vs_no_dox	MEFs	CAUAGGA	0.916666666666667
AAUGUUG	mmu-miR-409-3p	-0.732746022388511	0.231856674270259	1	140	T6Bmut_dox_vs_no_dox	MEFs	CAACAUU	5488
AUCUAGU	mmu-miR-878-5p	-0.182609665557042	0.427552149927257	1	59	T6Bmut_dox_vs_no_dox	MEFs	ACUAGAU	1.25
AGCUUAU	mmu-miR-21/mmu-miR-590-5p	-0.259832360218267	0.397496544082843	1	166	T6Bmut_dox_vs_no_dox	MEFs	AUAAGCU	1760731.66666667
ACUCCAG	mmu-miR-509-5p	0.218299898759493	0.41359772666787	1	96	T6Bmut_dox_vs_no_dox	MEFs	CUGGAGU	21.5833333333333
UAUACCA	mmu-miR-1949	0.357506825080725	0.36035620883994	1	72	T6Bmut_dox_vs_no_dox	MEFs	UGGUAUA	43.6666666666667
GGUUGCC	mmu-miR-453	-0.296890445354554	0.383275075488528	1	35	T6Bmut_dox_vs_no_dox	MEFs	GGCAACC	0
GAGAUGA	mmu-miR-143	-0.954433575900737	0.169932108669625	1	185	T6Bmut_dox_vs_no_dox	MEFs	UCAUCUC	315535.458333333
GGGGUCC	mmu-miR-615-5p	-2.15697537793336	0.0155037914816742	1	58	T6Bmut_dox_vs_no_dox	MEFs	GGACCCC	275.583333333333
AUGUGUG	mmu-miR-1187/mmu-miR-466a-5p	2.96722977913948	0.00150248146856965	0.934543473450325	95	T6Bmut_dox_vs_no_dox	MEFs	CACACAU	91.1225
AAGGGUC	mmu-miR-540-5p	-0.673205746557366	0.250408202899479	1	42	T6Bmut_dox_vs_no_dox	MEFs	GACCCUU	138.916666666667
GGUAGAC	mmu-miR-379/mmu-miR-1193-5p	1.23144180967929	0.109078833914545	1	54	T6Bmut_dox_vs_no_dox	MEFs	GUCUACC	13506.8333333333
AUGACUG	mmu-miR-468	-0.0432943123705695	0.482733462521967	1	65	T6Bmut_dox_vs_no_dox	MEFs	CAGUCAU	0
ACCCGUA	mmu-miR-99a/mmu-miR-100/mmu-miR-99b	-2.34519551897979	0.00950855208807746	1	32	T6Bmut_dox_vs_no_dox	MEFs	UACGGGU	173970.081666667
AACACUG	mmu-miR-141/mmu-miR-200a	-0.705280244378037	0.24031792611759	1	457	T6Bmut_dox_vs_no_dox	MEFs	CAGUGUU	20
CAGGUGA	mmu-miR-125a-3p	-0.59259202721604	0.276727108039202	1	85	T6Bmut_dox_vs_no_dox	MEFs	UCACCUG	1000.33333333333
GCAGAGG	mmu-miR-298	-0.663195236409872	0.253602760982423	1	192	T6Bmut_dox_vs_no_dox	MEFs	CCUCUGC	204.083333333333
GGAUUUC	mmu-miR-876-5p	1.3863266108352	0.082823597359275	1	100	T6Bmut_dox_vs_no_dox	MEFs	GAAAUCC	23.3333333333333
AGGGAUU	mmu-miR-541	-0.198744928905122	0.421231138416431	1	58	T6Bmut_dox_vs_no_dox	MEFs	AAUCCCU	11093.3333333333
GACCUAC	mmu-miR-1839-3p	1.0083348012438	0.15664688066008	1	40	T6Bmut_dox_vs_no_dox	MEFs	GUAGGUC	122.583333333333
AGAUGGA	mmu-miR-1969	-0.0477151194785624	0.480971642113287	1	89	T6Bmut_dox_vs_no_dox	MEFs	UCCAUCU	10.1666666666667
GUGUCAC	mmu-miR-1970	0.593248383014408	0.276507468600293	1	76	T6Bmut_dox_vs_no_dox	MEFs	GUGACAC	1.16666666666667
GACAUGU	mmu-miR-704	-0.421285378889121	0.336773352758489	1	92	T6Bmut_dox_vs_no_dox	MEFs	ACAUGUC	7.83333333333333
GACGAGG	mmu-miR-714	1.31723733754259	0.0938795410416938	1	6	T6Bmut_dox_vs_no_dox	MEFs	CCUCGUC	2.08333333333333
UCAGCUC	mmu-miR-337-3p	-0.075112819931975	0.470062473905105	1	115	T6Bmut_dox_vs_no_dox	MEFs	GAGCUGA	603.083333333333
AACGGAA	mmu-miR-191	-1.68614174517089	0.0458842505624412	1	38	T6Bmut_dox_vs_no_dox	MEFs	UUCCGUU	27214.0833333333
GUGACUG	mmu-miR-134	-1.43029439447307	0.0763162714822077	1	69	T6Bmut_dox_vs_no_dox	MEFs	CAGUCAC	5345.25
CAGGACC	mmu-miR-1933-3p	0.332160743522158	0.369883942300869	1	59	T6Bmut_dox_vs_no_dox	MEFs	GGUCCUG	9.91666666666667
CCCCGAG	mmu-miR-1895	-1.96795587192809	0.0245365576488023	1	9	T6Bmut_dox_vs_no_dox	MEFs	CUCGGGG	0.416666666666667
AUCAGGG	mmu-miR-465a-3p	-1.94412152447743	0.0259403991000514	1	38	T6Bmut_dox_vs_no_dox	MEFs	CCCUGAU	2.83333333333333
GGGGUGC	mmu-miR-342-5p	-0.797935713311272	0.212453898628963	1	45	T6Bmut_dox_vs_no_dox	MEFs	GCACCCC	131.083333333333
UGUAUGU	mmu-miR-297b-5p/mmu-miR-297a/mmu-miR-297c	1.36639881973677	0.0859069095265468	1	77	T6Bmut_dox_vs_no_dox	MEFs	ACAUACA	153.7575
CACCCUA	mmu-miR-1982.2	-1.14459312745169	0.126188870258732	1	36	T6Bmut_dox_vs_no_dox	MEFs	UAGGGUG	12.5
CGUGUGC	mmu-miR-696	-0.268069337893958	0.394322973562612	1	5	T6Bmut_dox_vs_no_dox	MEFs	GCACACG	0
UAGACUG	mmu-miR-151-3p	-0.504157215807169	0.307075451477483	1	59	T6Bmut_dox_vs_no_dox	MEFs	CAGUCUA	15651.25
GGACCCG	mmu-miR-711	1.00055205359236	0.15852170999562	1	23	T6Bmut_dox_vs_no_dox	MEFs	CGGGUCC	0.583333333333333
GAUUGGG	mmu-miR-695	-1.9518308319837	0.0254791462211953	1	55	T6Bmut_dox_vs_no_dox	MEFs	CCCAAUC	0
UGUAUGC	mmu-miR-675-3p	0.853794500528894	0.196609431081909	1	56	T6Bmut_dox_vs_no_dox	MEFs	GCAUACA	11.25
GCGGGGC	mmu-miR-744	0.258940834898632	0.397840445339123	1	14	T6Bmut_dox_vs_no_dox	MEFs	GCCCCGC	9384.83333333333
UGCAUGG	mmu-miR-669h-5p	-0.214527751102236	0.415067764210242	1	103	T6Bmut_dox_vs_no_dox	MEFs	CCAUGCA	6.33333333333333
GGUAAGC	mmu-miR-654-5p	1.29766857406647	0.0972006234779973	1	48	T6Bmut_dox_vs_no_dox	MEFs	GCUUACC	1.5
AUCCUUG	mmu-miR-362-5p	0.199453209420949	0.420954120703132	1	72	T6Bmut_dox_vs_no_dox	MEFs	CAAGGAU	1808.75
AUCCCUU	mmu-miR-188-5p	-0.193793970959849	0.423168603999427	1	101	T6Bmut_dox_vs_no_dox	MEFs	AAGGGAU	508.583333333333
GGAGACG	mmu-miR-139-3p	1.22946653718952	0.10944846833014	1	30	T6Bmut_dox_vs_no_dox	MEFs	CGUCUCC	2.25
GGGCCCC	mmu-miR-296-5p	-2.22909572281251	0.0129037682247664	1	71	T6Bmut_dox_vs_no_dox	MEFs	GGGGCCC	1259.41666666667
GGUGGUC	mmu-miR-323-5p	-0.073187777484809	0.470828346228948	1	56	T6Bmut_dox_vs_no_dox	MEFs	GACCACC	22.4166666666667
AGGGUUG	mmu-miR-296-3p	0.227763281817639	0.409915136656461	1	24	T6Bmut_dox_vs_no_dox	MEFs	CAACCCU	4915.25
GAAGGUC	mmu-miR-493	-1.19537194109709	0.115970871681367	1	57	T6Bmut_dox_vs_no_dox	MEFs	GACCUUC	98.1666666666667
AAUGAGU	mmu-miR-1194	0.250171879902186	0.401227215267191	1	99	T6Bmut_dox_vs_no_dox	MEFs	ACUCAUU	0.25
GAGAGAU	mmu-miR-741	-1.65204884016937	0.0492622974535512	1	67	T6Bmut_dox_vs_no_dox	MEFs	AUCUCUC	1.5
CUGACCC	mmu-miR-345-5p	0.333229630170598	0.369480476692395	1	89	T6Bmut_dox_vs_no_dox	MEFs	GGGUCAG	1440.58333333333
CUUCGCG	mmu-miR-1945	-1.67531069817625	0.0469366437554901	1	2	T6Bmut_dox_vs_no_dox	MEFs	CGCGAAG	59.6666666666667
AACCGUU	mmu-miR-451	-1.29975341263205	0.0968427486890493	1	9	T6Bmut_dox_vs_no_dox	MEFs	AACGGUU	13.4166666666667
CGUACCG	mmu-miR-126-3p	-0.553567545303083	0.289937421169467	1	19	T6Bmut_dox_vs_no_dox	MEFs	CGGUACG	1186.91666666667
GCGGGCA	mmu-miR-666-5p	0.08233810593077	0.467188926564719	1	10	T6Bmut_dox_vs_no_dox	MEFs	UGCCCGC	413.625
AGCCUCG	mmu-miR-681	0.0194824384565197	0.492228123233415	1	13	T6Bmut_dox_vs_no_dox	MEFs	CGAGGCU	0
GGUGCGG	mmu-miR-675-5p	1.40079965157798	0.0806369964368438	1	5	T6Bmut_dox_vs_no_dox	MEFs	CCGCACC	10.0833333333333
CCGGGCA	mmu-miR-1946b	1.16427118320424	0.122157065415093	1	11	T6Bmut_dox_vs_no_dox	MEFs	UGCCCGG	1.08333333333333
AUGCCUU	mmu-miR-532-5p	-1.32200264424195	0.093083635201886	1	106	T6Bmut_dox_vs_no_dox	MEFs	AAGGCAU	5273.16666666667
GAUCGAC	mmu-miR-369-5p	-0.362551177395042	0.358470093445686	1	4	T6Bmut_dox_vs_no_dox	MEFs	GUCGAUC	836.666666666667
ACCAGUC	mmu-miR-1905	-1.08795176461175	0.138308201091675	1	68	T6Bmut_dox_vs_no_dox	MEFs	GACUGGU	0.0833333333333333
AUCGUAC	mmu-miR-487b	0.00797415963758439	0.496818804283832	1	10	T6Bmut_dox_vs_no_dox	MEFs	GUACGAU	503.5
ACGUCAU	mmu-miR-598	0.0688854366648464	0.472540405419385	1	10	T6Bmut_dox_vs_no_dox	MEFs	AUGACGU	511.5
CGGAUCC	mmu-miR-127	-0.308790432630253	0.378740473693573	1	11	T6Bmut_dox_vs_no_dox	MEFs	GGAUCCG	40957.8333333333
CUCGACU	mmu-miR-434-5p	-0.940521575189746	0.173475044067468	1	1	T6Bmut_dox_vs_no_dox	MEFs	AGUCGAG	6147.20833333333
UUCCGCC	mmu-miR-718	-0.616163363804091	0.268893352765312	1	6	T6Bmut_dox_vs_no_dox	MEFs	GGCGGAA	0.25
CGUCCUG	mmu-miR-676	-0.649015215220811	0.258164270836209	1	7	T6Bmut_dox_vs_no_dox	MEFs	CAGGACG	1409.41666666667
UCGUAGA	mmu-miR-376a	-0.681952925130623	0.247634358954916	1	1	T6Bmut_dox_vs_no_dox	MEFs	UCUACGA	3314.66666666667
CGUGUGU	mmu-miR-466f	-0.847854781141859	0.198259425107779	1	9	T6Bmut_dox_vs_no_dox	MEFs	ACACACG	6.21333333333333
GCCGGGC	mmu-miR-1946a	1.74696123152681	0.04032203160022	1	10	T6Bmut_dox_vs_no_dox	MEFs	GCCCGGC	4
GUGCCGC	mmu-miR-293	0.363141997238558	0.358249406807438	1	4	T6Bmut_dox_vs_no_dox	MEFs	GCGGCAC	1.5
ACGUGUG	mmu-miR-466f-5p	-0.734691959300309	0.231263559182111	1	4	T6Bmut_dox_vs_no_dox	MEFs	CACACGU	18.64
ACGCUCA	mmu-miR-574-3p	-0.627485093532884	0.265170652177529	1	5	T6Bmut_dox_vs_no_dox	MEFs	UGAGCGU	1675.04166666667
CCGGGGC	mmu-miR-673-3p	-0.669042595846111	0.251734153204144	1	9	T6Bmut_dox_vs_no_dox	MEFs	GCCCCGG	108.916666666667
UCUCGGU	mmu-miR-678	-0.237234884373257	0.406237287413756	1	3	T6Bmut_dox_vs_no_dox	MEFs	ACCGAGA	0.166666666666667
CGAGGAG	mmu-miR-151-5p	-0.485133619422473	0.313790782711719	1	5	T6Bmut_dox_vs_no_dox	MEFs	CUCCUCG	20096.8333333333
CCGAGCC	mmu-miR-615-3p	0.0328379352771016	0.486901913269136	1	3	T6Bmut_dox_vs_no_dox	MEFs	GGCUCGG	6351.75
CCGUCUC	mmu-miR-340-3p	0.62789090750845	0.2650377038928	1	6	T6Bmut_dox_vs_no_dox	MEFs	GAGACGG	160.75
CGUGUCU	mmu-miR-187	0.670439657582064	0.251288780538035	1	5	T6Bmut_dox_vs_no_dox	MEFs	AGACACG	43.6666666666667
UUGCGGA	mmu-miR-1932	1.17332646025806	0.120332457610463	1	2	T6Bmut_dox_vs_no_dox	MEFs	UCCGCAA	1.5
GAGCGCC	mmu-miR-339-3p	0.550061716240606	0.2911385219421	1	6	T6Bmut_dox_vs_no_dox	MEFs	GGCGCUC	297.583333333333
GCUCGGU	mmu-miR-423-3p	-0.591805507165533	0.276990417494246	1	5	T6Bmut_dox_vs_no_dox	MEFs	ACCGAGC	13196.8333333333
CGACCCA	mmu-miR-551b	-0.0899890222346219	0.464147969210651	1	4	T6Bmut_dox_vs_no_dox	MEFs	UGGGUCG	0.0833333333333333
AUGGCGC	mmu-miR-652	0.0761788035545696	0.469638422996075	1	2	T6Bmut_dox_vs_no_dox	MEFs	GCGCCAU	7189.66666666667
CCGGUUC	mmu-miR-671-3p	0.193181899296291	0.423408256997137	1	4	T6Bmut_dox_vs_no_dox	MEFs	GAACCGG	542.416666666667
GCGAUGG	mmu-miR-1899	1.46353245401035	0.0716608699593287	1	4	T6Bmut_dox_vs_no_dox	MEFs	CCAUCGC	0
AGACGGG	mmu-miR-483	-0.940009751363261	0.173606279405329	1	3	T6Bmut_dox_vs_no_dox	MEFs	CCCGUCU	0.0833333333333333
AGCCGGG	mmu-miR-1965	-1.93063215992527	0.0267642789211116	1	3	T6Bmut_dox_vs_no_dox	MEFs	CCCGGCU	38.0833333333333
GCGCGGG	mmu-miR-1893	-1.21023826297984	0.113093739861114	1	4	T6Bmut_dox_vs_no_dox	MEFs	CCCGCGC	0.833333333333333
UAGCCGC	mmu-miR-701	-1.48870214873323	0.0682829094719965	1	2	T6Bmut_dox_vs_no_dox	MEFs	GCGGCUA	170
AACGGCG	mmu-miR-337-5p	0.868799307030091	0.192478456109751	1	2	T6Bmut_dox_vs_no_dox	MEFs	CGCCGUU	848.583333333333
ACGCGGG	mmu-miR-700	1.81873642913708	0.0344758255569515	1	1	T6Bmut_dox_vs_no_dox	MEFs	CCCGCGU	540.25
