# Supplementary material for: Inducible and reversible inhibition of miRNA-mediated gene repression in vivo
Source: eLife. 2021 Aug 31;10:e70948. doi: 10.7554/eLife.70948 (PMC8476124; doi:10.7554/eLife.70948)
Supplement: Figure 1—source data 3. [file elife-70948-fig1-data3.csv]

	MEF_T6B_mut_dox_1	MEF_T6B_mut_dox_2	MEF_T6B_mut_dox_3	MEF_T6B_mut_nodox_1	MEF_T6B_mut_nodox_2	MEF_T6B_mut_nodox_3	MEF_T6B_wt_dox_1	MEF_T6B_wt_dox_2	MEF_T6B_wt_dox_3	MEF_T6B_wt_nodox_1	MEF_T6B_wt_nodox_2	MEF_T6B_wt_nodox_3
mmu-let-7a-1-3p	895	998	822	768	89	463	1748	822	2285	237	3649	2828
mmu-let-7a-2-3p	40	49	18	72	12	27	102	69	127	42	272	125
mmu-let-7a-5p	167529	180575	79009	105971	17756	82850	325959	275211	555364	96357	341651	536740
mmu-let-7b-3p	658	679	192	406	47	249	1039	560	1157	246	1337	1555
mmu-let-7b-5p	67587	68358	36173	40267	7807	39720	192103	131025	137698	39374	115613	257712
mmu-let-7c-1-3p	21	40	12	23	2	7	39	44	48	6	66	60
mmu-let-7c-2-3p	941	1073	826	808	81	454	1815	845	2337	239	3742	2810
mmu-let-7c-5p	164328	168444	87776	103178	19268	97906	357748	293261	474133	103337	301693	483279
mmu-let-7d-3p	10157	11704	4018	5083	594	4495	24144	21222	35254	3495	17956	29269
mmu-let-7d-5p	91574	84160	44353	60626	10078	46438	223415	215334	366520	58289	193930	217709
mmu-let-7e-3p	671	701	275	366	55	261	1386	1474	1834	306	1078	2065
mmu-let-7e-5p	50991	25637	26032	33486	6634	24492	109172	111979	184938	32308	105575	92878
mmu-let-7f-1-3p	211	248	175	167	20	111	403	200	519	88	545	465
mmu-let-7f-2-3p	49	91	69	100	3	20	139	55	247	22	187	203
mmu-let-7f-5p	215044	208454	100188	150994	22275	97538	395968	426422	678747	139135	436573	678182
mmu-let-7g-3p	240	133	86	170	14	56	169	139	274	199	461	369
mmu-let-7g-5p	49745	56372	25558	33230	5307	24932	132047	121347	228670	30634	96290	149493
mmu-let-7i-3p	2873	2116	1184	1966	507	1145	2398	1297	3301	3157	4318	3938
mmu-let-7i-5p	101634	120945	43276	84947	14966	55449	284915	275501	440228	67761	230704	360805
mmu-let-7j	23436	22475	11078	13405	2334	7667	37591	30350	53191	13651	43208	13739
mmu-let-7k	6	3	3	7	0	3	10	33	16	9	22	5
mmu-miR-100-3p	321	141	205	209	45	181	374	549	680	215	830	1087
mmu-miR-100-5p	36653	29538	16811	18387	2875	11264	47031	45541	59264	14354	46046	82682
mmu-miR-101a-3p	2079	4011	607	2221	485	1413	9523	11562	26069	1029	9000	15611
mmu-miR-101a-5p	80	52	41	29	3	28	58	73	170	43	133	203
mmu-miR-101b-3p	8140	12063	2896	7321	1799	5976	25679	35553	63123	4434	30117	46967
mmu-miR-101b-5p	3	6	4	6	2	8	9	11	31	5	16	44
mmu-miR-101c	5	24	8	9	3	5	34	9	36	4	49	52
mmu-miR-103-1-5p	1	0	1	0	1	0	11	2	13	2	1	5
mmu-miR-103-2-5p	8	6	19	7	2	6	23	20	67	8	35	39
mmu-miR-103-3p	31357	33723	19086	21216	6178	17025	83808	160831	129242	24372	75046	197444
mmu-miR-105	0	0	0	0	0	0	0	0	0	0	0	0
mmu-miR-106a-3p	0	0	0	0	0	0	0	0	0	0	0	0
mmu-miR-106a-5p	17	20	15	15	8	12	34	49	84	15	49	105
mmu-miR-106b-3p	1885	2577	788	2176	356	1118	4736	3245	16351	1387	4214	8491
mmu-miR-106b-5p	33967	32092	18374	22599	4697	17492	60765	87362	104963	23356	63762	100108
mmu-miR-107-3p	3267	2753	1709	2068	478	1446	6522	7038	9681	2541	6840	9669
mmu-miR-107-5p	2	1	9	1	0	3	11	10	52	5	12	19
mmu-miR-10a-3p	704	1025	370	567	89	352	1367	1489	1698	382	1555	1906
mmu-miR-10a-5p	28052	27456	14896	12284	2258	12984	51186	44774	65723	13889	41694	70894
mmu-miR-10b-3p	53	70	27	57	6	29	116	148	151	39	123	78
mmu-miR-10b-5p	2871	2867	1433	1492	263	1411	5960	5900	8341	1222	4683	8243
mmu-miR-1187	5	11	7	11	3	10	40	32	34	4	23	70
mmu-miR-1188-3p	2	2	1	0	0	0	1	2	12	0	4	2
mmu-miR-1188-5p	30	59	12	17	4	18	68	106	151	14	57	153
mmu-miR-1190	0	0	2	0	0	0	3	0	3	0	2	1
mmu-miR-1191a	89	173	44	120	12	102	388	251	399	42	347	322
mmu-miR-1191b-3p	0	0	0	0	0	0	1	2	2	0	3	3
mmu-miR-1191b-5p	22	20	10	8	4	7	38	38	72	2	34	32
mmu-miR-1192	0	0	0	0	0	0	0	0	0	0	0	0
mmu-miR-1193-3p	384	637	131	292	42	226	934	649	1160	203	1001	1245
mmu-miR-1193-5p	27	37	27	17	1	14	71	72	99	18	81	120
mmu-miR-1194	48	59	21	29	4	11	159	117	192	27	83	138
mmu-miR-1195	4	32	3	14	6	17	38	189	99	11	44	39
mmu-miR-1197-3p	85	106	26	45	12	22	101	109	192	16	257	161
mmu-miR-1197-5p	8	9	8	0	0	1	4	10	0	6	18	26
mmu-miR-1198-3p	16	29	1	23	5	8	44	36	86	23	27	99
mmu-miR-1198-5p	566	832	313	411	104	482	2192	1800	2987	238	1258	2079
mmu-miR-1199-3p	0	0	0	0	0	0	1	1	0	0	1	0
mmu-miR-1199-5p	3	1	1	1	0	0	1	1	3	3	0	5
mmu-miR-122-3p	1	0	0	0	1	0	0	0	2	0	1	1
mmu-miR-122-5p	26	32	10	26	2	22	45	43	63	16	53	57
mmu-miR-1224-3p	0	0	0	0	0	0	0	0	0	0	0	0
mmu-miR-1224-5p	1	2	0	6	2	6	6	13	11	2	14	2
mmu-miR-1231-3p	4	1	0	0	0	0	7	5	6	0	7	1
mmu-miR-1231-5p	4	1	1	0	1	2	11	6	13	0	12	4
mmu-miR-124-3p	2	1	0	0	1	1	2	3	4	0	4	2
mmu-miR-124-5p	0	1	0	3	0	0	0	0	2	0	2	1
mmu-miR-1247-3p	2	9	1	9	0	3	1	7	9	4	10	24
mmu-miR-1247-5p	62	99	36	55	7	41	95	106	206	71	225	254
mmu-miR-1249-3p	224	214	137	136	11	41	560	310	735	143	418	400
mmu-miR-1249-5p	2	5	4	1	1	1	7	2	14	0	13	5
mmu-miR-1251-3p	1	1	0	1	1	1	5	11	11	3	5	10
mmu-miR-1251-5p	21	11	9	4	2	4	60	47	74	19	37	56
mmu-miR-1258-3p	0	1	0	1	1	0	2	0	0	0	0	0
mmu-miR-1258-5p	0	0	0	0	0	0	0	0	0	0	0	0
mmu-miR-125a-3p	346	1378	208	860	423	706	560	931	2191	213	1881	2228
mmu-miR-125a-5p	80827	88717	39935	41396	6974	37325	189926	189607	286611	43385	140320	224997
mmu-miR-125b-1-3p	2921	10837	3191	11264	685	2967	13775	10183	18960	9982	25718	30653
mmu-miR-125b-2-3p	594	528	227	533	130	318	1045	965	1560	490	970	1747
mmu-miR-125b-5p	668684	799649	367320	406616	60974	333972	1505976	1565166	1825960	246741	1285896	1872851
mmu-miR-1264-3p	0	0	0	0	0	0	1	0	0	0	1	0
mmu-miR-1264-5p	0	0	0	0	0	0	0	0	0	0	0	0
mmu-miR-126a-3p	1029	992	588	706	94	665	1684	1901	2658	396	1804	2296
mmu-miR-126a-5p	74	158	79	72	18	92	176	268	450	21	225	376
mmu-miR-126b-3p	1	1	0	0	0	0	0	3	4	0	2	2
mmu-miR-126b-5p	1	1	3	0	1	2	0	4	1	3	4	2
mmu-miR-127-3p	25659	25801	11424	16107	2823	11828	59148	67478	76328	13865	47005	70724
mmu-miR-127-5p	2440	2724	854	1086	312	881	3558	4021	6590	1487	5117	10087
mmu-miR-128-1-5p	14	23	3	13	2	9	29	26	36	10	24	68
mmu-miR-128-2-5p	1	0	3	0	0	0	0	0	0	0	0	0
mmu-miR-128-3p	962	1342	498	441	69	502	2945	2548	4189	563	1900	3310
mmu-miR-129-1-3p	8	9	12	2	1	4	9	8	15	9	10	17
mmu-miR-129-2-3p	4607	2642	1937	1863	455	1388	3462	2601	5015	4226	6911	4904
mmu-miR-129-5p	5742	5987	2870	3326	572	2533	8911	8188	12543	2810	11138	16299
mmu-miR-1291	30	29	13	21	3	14	45	76	70	23	48	75
mmu-miR-1298-3p	0	0	0	0	0	0	0	0	0	0	0	0
mmu-miR-1298-5p	0	1	0	0	0	1	1	0	1	0	0	5
mmu-miR-129b-3p	0	0	0	1	0	0	0	0	1	0	0	0
mmu-miR-129b-5p	0	0	1	0	0	0	0	0	0	0	1	0
mmu-miR-1306-3p	100	113	39	42	9	54	214	205	284	42	143	229
mmu-miR-1306-5p	186	193	119	100	15	76	580	412	799	91	391	676
mmu-miR-130a-3p	23104	30205	10977	29870	6699	15774	25257	56674	70331	32021	61280	78914
mmu-miR-130a-5p	33	45	33	36	7	21	58	27	68	33	105	136
mmu-miR-130b-3p	753	790	364	732	174	516	1711	1680	2396	945	1850	2728
mmu-miR-130b-5p	148	204	70	100	17	73	385	294	445	91	369	596
mmu-miR-130c	0	0	0	0	0	0	0	0	0	1	0	0
mmu-miR-132-3p	402	1324	304	980	308	1019	1157	3376	5342	285	1780	4509
mmu-miR-132-5p	155	96	72	99	11	25	172	269	339	101	310	522
mmu-miR-133a-3p	7	0	1	4	0	0	11	5	19	4	8	5
mmu-miR-133a-5p	0	0	3	0	0	0	0	0	1	1	2	0
mmu-miR-133b-3p	4	1	1	0	0	0	1	4	4	0	0	1
mmu-miR-133b-5p	0	0	0	0	0	0	0	1	3	0	1	0
mmu-miR-133c	0	0	0	0	0	0	0	0	0	1	0	0
mmu-miR-134-3p	52	86	18	43	4	12	70	50	179	17	195	163
mmu-miR-134-5p	1124	4528	592	3139	826	2647	4391	8316	12404	747	7000	12945
mmu-miR-135a-1-3p	0	0	0	0	0	0	0	0	0	1	0	1
mmu-miR-135a-2-3p	24	37	9	46	9	41	159	267	303	23	194	302
mmu-miR-135a-5p	1551	1495	1572	1528	353	1223	4162	2947	8821	893	4787	6163
mmu-miR-135b-3p	0	0	0	0	0	0	0	0	0	0	1	0
mmu-miR-135b-5p	15	11	13	8	2	10	26	17	42	13	49	52
mmu-miR-136-3p	663	630	381	484	27	237	524	391	854	198	1264	1464
mmu-miR-136-5p	2425	2433	810	920	473	1775	735	729	3584	1391	4683	5043
mmu-miR-137-3p	2	1	0	1	1	0	1	0	0	1	0	1
mmu-miR-137-5p	0	0	0	0	0	0	0	0	0	0	1	0
mmu-miR-138-1-3p	1	3	1	3	1	1	2	0	3	1	5	5
mmu-miR-138-2-3p	3	5	4	1	0	1	12	6	23	4	6	18
mmu-miR-138-5p	205	380	180	299	49	220	1346	1274	1842	156	555	1444
mmu-miR-139-3p	4	1	0	1	0	0	5	4	5	0	2	3
mmu-miR-139-5p	16	20	6	9	1	13	69	61	105	12	35	49
mmu-miR-140-3p	34126	45165	12309	16816	8082	18121	143276	134535	189839	24737	81865	153817
mmu-miR-140-5p	4974	10538	5009	6984	2152	5942	6809	18715	11043	2195	20439	36002
mmu-miR-141-3p	6	13	3	10	3	7	19	18	30	10	22	63
mmu-miR-141-5p	0	0	0	0	0	2	0	1	1	0	3	4
mmu-miR-142a-3p	8	5	2	0	1	0	11	8	16	0	5	11
mmu-miR-142a-5p	2	1	1	3	1	0	3	2	7	0	4	1
mmu-miR-142b	0	0	0	0	0	0	0	0	0	0	0	0
mmu-miR-143-3p	238139	223443	121883	232451	52972	170515	386306	305683	549488	202458	441404	708845
mmu-miR-143-5p	1513	3106	962	4349	644	2350	6253	4340	10195	1219	7746	16930
mmu-miR-144-3p	4	1	4	0	2	0	3	0	5	4	4	11
mmu-miR-144-5p	3	1	0	0	0	1	6	2	3	0	3	11
mmu-miR-145a-3p	3861	4310	1979	1918	273	1888	5210	3858	7925	1779	8683	13078
mmu-miR-145a-5p	32401	78558	8808	10457	1968	10810	45078	24991	107238	13051	43471	64582
mmu-miR-145b	7	17	12	5	0	7	5	9	12	12	11	29
mmu-miR-146a-3p	5	5	1	0	0	0	17	16	21	2	6	7
mmu-miR-146a-5p	961	1302	420	325	24	469	2560	2723	4307	266	1119	2100
mmu-miR-146b-3p	10	10	5	3	3	3	9	18	24	3	18	24
mmu-miR-146b-5p	965	910	460	648	105	406	1617	1499	2175	466	1606	1431
mmu-miR-147-3p	123	156	23	79	9	45	247	306	613	66	264	435
mmu-miR-147-5p	4	7	2	2	0	2	20	27	39	4	12	19
mmu-miR-148a-3p	2349	9050	824	7211	1943	6863	7289	12602	26666	1579	14935	32510
mmu-miR-148a-5p	203	183	72	124	23	114	269	327	385	149	472	641
mmu-miR-148b-3p	2244	7504	910	4849	981	3849	11366	18187	34198	1743	7365	23315
mmu-miR-148b-5p	192	184	86	123	46	163	350	430	435	97	317	483
mmu-miR-149-3p	8	6	0	5	1	0	18	7	10	4	11	17
mmu-miR-149-5p	1206	1389	651	827	64	306	4370	2417	7086	467	2186	2427
mmu-miR-150-3p	1	3	4	2	0	0	2	5	0	1	0	6
mmu-miR-150-5p	15	9	7	13	1	4	15	17	24	9	16	23
mmu-miR-151-3p	9274	10080	4416	6781	1413	5541	24486	27798	36273	6270	17772	33660
mmu-miR-151-5p	16174	15267	11296	13551	2527	9515	36438	40792	51339	14662	27512	12831
mmu-miR-152-3p	16330	18479	7915	12924	2621	12353	34601	36577	50345	8562	26095	61558
mmu-miR-152-5p	213	258	68	143	32	98	476	581	705	226	585	823
mmu-miR-153-3p	0	0	2	1	0	1	0	0	1	0	1	0
mmu-miR-153-5p	0	0	0	0	0	0	0	0	0	0	0	0
mmu-miR-154-3p	186	348	191	159	22	182	2884	3485	4177	106	665	1188
mmu-miR-154-5p	129	438	242	138	35	142	619	2024	1407	112	547	2225
mmu-miR-155-3p	92	79	26	44	8	45	138	140	174	43	181	198
mmu-miR-155-5p	2173	1574	1840	2060	432	1793	6159	5196	7960	1410	5374	6782
mmu-miR-15a-3p	553	335	362	206	42	137	607	484	1154	271	1057	1133
mmu-miR-15a-5p	5412	7477	4540	5848	1197	3597	11062	14572	15716	13365	22498	43364
mmu-miR-15b-3p	1527	1466	767	1195	268	1023	2852	1765	3468	1109	2898	3108
mmu-miR-15b-5p	5731	7859	3526	7216	1293	3840	20210	20015	24332	6820	22659	25020
mmu-miR-16-1-3p	164	465	46	394	67	206	433	1705	3332	146	1967	4100
mmu-miR-16-2-3p	639	644	297	419	65	441	1035	752	1524	483	1176	1642
mmu-miR-16-5p	30054	39627	16222	43414	7677	26351	84520	80245	120710	33620	79421	106566
mmu-miR-1668	1	1	1	3	0	0	0	4	0	1	6	3
mmu-miR-17-3p	1687	1731	558	1311	581	1019	3030	3791	6070	814	4821	10170
mmu-miR-17-5p	16302	25505	21020	24794	8681	21372	24383	79072	54863	6826	64205	95510
mmu-miR-181a-1-3p	487	553	242	254	51	197	897	666	1298	262	1088	1083
mmu-miR-181a-2-3p	265	272	125	115	9	107	586	475	748	138	563	592
mmu-miR-181a-5p	12264	10955	5726	8835	1024	5010	25297	32200	49661	6253	24468	41342
mmu-miR-181b-1-3p	62	27	23	14	3	15	62	65	69	27	43	70
mmu-miR-181b-2-3p	11	12	11	6	7	7	31	26	48	12	31	27
mmu-miR-181b-5p	4840	4653	2507	3847	530	2450	12775	15663	20713	2909	10361	17215
mmu-miR-181c-3p	55	89	18	69	20	37	115	146	127	34	213	271
mmu-miR-181c-5p	681	585	321	540	58	257	1191	1737	2576	453	1659	2545
mmu-miR-181d-3p	2	6	4	2	1	2	4	11	6	7	10	2
mmu-miR-181d-5p	677	509	398	710	129	430	1292	1499	1740	672	1220	2399
mmu-miR-182-3p	113	136	51	110	12	74	471	373	852	41	260	682
mmu-miR-182-5p	11833	14962	5450	8522	922	6133	39689	40222	57186	6397	23643	36933
mmu-miR-183-3p	150	188	85	143	27	86	854	1068	1541	122	502	801
mmu-miR-183-5p	5780	6153	2813	3565	666	3431	20774	21978	31101	3200	11176	16540
mmu-miR-1839-3p	82	87	29	75	13	37	226	196	259	82	235	197
mmu-miR-1839-5p	1313	1301	615	702	141	705	3094	3361	4061	515	1987	3859
mmu-miR-184-3p	3	16	4	11	1	4	13	8	16	3	11	18
mmu-miR-184-5p	0	0	0	1	0	0	0	0	0	0	0	3
mmu-miR-1843a-3p	21	42	17	5	3	8	94	61	137	8	41	89
mmu-miR-1843a-5p	156	134	48	86	14	73	318	255	384	93	260	468
mmu-miR-1843b-3p	17	24	5	10	0	8	35	28	81	7	34	72
mmu-miR-1843b-5p	123	106	70	81	22	37	229	222	278	76	245	377
mmu-miR-185-3p	44	78	20	43	3	17	131	93	245	31	83	240
mmu-miR-185-5p	318	1384	249	729	141	443	2992	4438	7308	251	2906	935
mmu-miR-186-3p	74	92	40	61	18	18	92	101	257	72	199	303
mmu-miR-186-5p	14339	14106	7268	11969	1873	8266	30848	34778	44374	9781	26453	33501
mmu-miR-187-3p	31	34	10	18	1	17	87	87	132	8	50	61
mmu-miR-187-5p	2	0	1	0	1	2	10	3	7	4	1	10
mmu-miR-188-3p	23	32	18	28	6	10	74	90	150	27	74	150
mmu-miR-188-5p	189	304	149	438	122	197	434	437	1227	171	718	872
mmu-miR-1892	0	0	0	1	0	0	0	1	0	0	0	0
mmu-miR-1893	0	1	0	0	0	0	1	1	2	0	3	0
mmu-miR-1894-3p	1	0	0	0	0	0	0	0	1	0	0	0
mmu-miR-1894-5p	0	1	0	0	0	0	0	0	0	0	1	0
mmu-miR-1895	2	1	0	1	0	0	0	4	2	0	2	0
mmu-miR-1896	1	0	1	0	0	0	1	0	0	0	0	0
mmu-miR-1897-3p	0	0	0	0	0	0	0	0	4	0	1	1
mmu-miR-1897-5p	1	1	1	2	0	2	3	4	1	2	3	5
mmu-miR-1898	1	0	4	0	0	1	0	0	0	0	0	0
mmu-miR-1899	0	0	0	0	0	0	0	1	0	0	0	1
mmu-miR-18a-3p	496	500	209	373	85	321	803	689	1869	365	972	960
mmu-miR-18a-5p	11036	10614	8889	6929	2819	5621	11595	28947	31630	5765	23294	26789
mmu-miR-18b-3p	0	0	1	0	0	0	0	0	0	0	0	0
mmu-miR-18b-5p	1	2	2	1	0	1	0	0	0	3	1	1
mmu-miR-1900	0	0	1	0	0	0	1	0	0	0	0	0
mmu-miR-1901	1	1	0	1	0	1	4	1	1	1	2	3
mmu-miR-1902	0	0	0	0	0	0	0	0	0	0	0	0
mmu-miR-1903	0	0	0	0	0	0	0	0	0	0	0	0
mmu-miR-1904	0	1	0	0	0	0	0	0	0	0	0	0
mmu-miR-1905	0	0	0	1	0	0	1	0	2	0	2	4
mmu-miR-1906	0	1	1	1	0	1	1	0	3	2	2	0
mmu-miR-1907	0	0	0	0	0	0	1	3	0	1	0	0
mmu-miR-190a-3p	32	21	14	14	5	13	41	38	60	11	71	59
mmu-miR-190a-5p	594	764	509	779	178	547	1138	735	1892	510	1066	2774
mmu-miR-190b-3p	7	1	0	1	0	0	4	3	7	1	2	5
mmu-miR-190b-5p	25	48	15	55	15	55	47	110	157	7	59	114
mmu-miR-191-3p	204	196	115	31	5	72	256	235	371	95	254	692
mmu-miR-191-5p	6262	21222	9743	12761	2615	11520	43466	41876	63687	13001	41132	57451
mmu-miR-1912-3p	0	0	0	0	0	0	0	0	0	0	0	0
mmu-miR-1912-5p	0	0	0	1	0	0	1	0	0	0	0	0
mmu-miR-192-3p	8	5	4	4	0	1	12	3	19	3	9	19
mmu-miR-192-5p	1051	1150	447	725	113	532	3020	2786	3933	585	1927	2776
mmu-miR-1927	0	2	0	3	0	2	7	9	13	2	9	11
mmu-miR-1928	0	0	0	0	0	0	0	0	0	0	0	0
mmu-miR-1929-3p	0	1	0	1	0	1	3	3	2	1	0	1
mmu-miR-1929-5p	10	5	3	3	1	3	15	11	15	2	17	18
mmu-miR-1930-3p	5	12	2	5	3	3	23	15	25	5	10	34
mmu-miR-1930-5p	51	67	40	48	10	45	226	173	227	47	99	208
mmu-miR-1931	18	14	10	15	2	4	59	48	42	14	18	34
mmu-miR-1932	0	1	1	1	0	0	3	4	3	2	1	2
mmu-miR-1933-3p	5	3	4	3	0	2	26	27	18	3	7	19
mmu-miR-1933-5p	8	4	2	4	0	0	11	8	20	1	4	5
mmu-miR-1934-3p	16	23	15	8	3	9	24	45	50	6	28	73
mmu-miR-1934-5p	10	16	15	11	0	0	36	20	56	4	36	33
mmu-miR-1936	0	0	1	0	0	0	3	1	1	0	0	0
mmu-miR-1938	4	3	4	2	0	0	6	9	20	3	7	11
mmu-miR-193a-3p	3390	1514	781	2254	2260	1314	798	546	4148	7633	6727	4010
mmu-miR-193a-5p	636	1118	473	689	121	581	1799	2479	2019	373	1776	3357
mmu-miR-193b-3p	916	755	631	538	80	276	3040	1533	4887	233	1741	1924
mmu-miR-193b-5p	33	68	15	27	9	27	79	102	157	25	90	187
mmu-miR-194-1-3p	0	0	0	0	0	0	0	0	0	1	0	2
mmu-miR-194-2-3p	16	26	6	12	0	3	50	41	81	10	31	50
mmu-miR-194-5p	1755	1759	875	1757	331	1019	4672	5774	3452	1343	3970	5111
mmu-miR-1941-3p	5	4	0	2	1	3	27	32	38	2	19	14
mmu-miR-1941-5p	21	18	9	17	5	15	143	63	46	16	43	0
mmu-miR-1942	0	0	0	0	0	0	0	0	0	0	0	0
mmu-miR-1943-3p	24	25	14	14	2	9	65	42	102	14	47	61
mmu-miR-1943-5p	10	55	7	41	11	19	103	307	335	10	217	426
mmu-miR-1945	27	48	17	28	11	32	50	62	155	23	80	154
mmu-miR-1946a	25	45	18	9	5	14	189	187	248	31	57	112
mmu-miR-1946b	12	12	3	8	0	3	18	20	26	2	14	38
mmu-miR-1947-3p	0	0	1	0	0	0	3	1	1	0	0	0
mmu-miR-1947-5p	7	13	6	6	2	7	4	12	3	6	11	23
mmu-miR-1948-3p	3	7	3	5	1	3	10	25	16	5	20	16
mmu-miR-1948-5p	20	25	10	13	4	8	45	50	87	5	38	48
mmu-miR-1949	42	25	15	22	2	16	32	74	84	31	84	124
mmu-miR-1950	7	15	2	5	0	2	20	7	45	3	13	17
mmu-miR-1951	3	1	0	1	0	1	6	6	8	3	2	1
mmu-miR-1952	0	0	0	0	0	0	0	0	0	0	0	2
mmu-miR-1953	30	49	5	9	1	9	51	36	90	5	47	35
mmu-miR-1954	3	1	1	1	0	0	0	1	6	0	0	5
mmu-miR-1955-3p	23	7	11	15	3	7	44	51	57	11	30	39
mmu-miR-1955-5p	43	45	20	35	4	21	127	148	170	23	119	142
mmu-miR-1956	0	0	0	0	0	1	1	2	1	1	1	1
mmu-miR-1957a	23	42	10	26	5	29	65	107	166	21	87	174
mmu-miR-1957b	0	0	0	0	0	0	0	0	0	0	0	1
mmu-miR-1958	0	0	0	2	0	0	2	2	2	2	0	2
mmu-miR-195a-3p	35	19	17	25	1	18	26	21	32	29	41	51
mmu-miR-195a-5p	236	206	128	167	33	96	261	269	356	128	357	556
mmu-miR-195b	0	0	0	0	0	0	0	0	0	0	0	1
mmu-miR-1960	0	0	0	1	1	1	2	6	3	0	6	3
mmu-miR-1961	0	0	0	0	0	1	1	0	0	3	0	0
mmu-miR-1962	1	0	0	0	0	1	0	0	0	0	0	0
mmu-miR-1963	0	0	1	0	0	0	0	0	0	0	0	0
mmu-miR-1964-3p	158	118	99	117	16	53	362	237	393	106	308	302
mmu-miR-1964-5p	3	5	1	3	1	2	21	14	24	4	10	18
mmu-miR-1966-3p	5	2	1	1	0	0	1	5	2	0	3	4
mmu-miR-1966-5p	0	1	0	2	0	0	1	0	4	0	0	0
mmu-miR-1967	0	0	1	0	0	0	0	1	1	0	0	0
mmu-miR-1968-3p	0	0	0	0	0	0	0	0	0	0	0	0
mmu-miR-1968-5p	3	7	0	4	1	8	8	9	11	1	2	8
mmu-miR-1969	2	5	9	4	0	12	33	24	17	10	12	16
mmu-miR-196a-1-3p	131	268	55	73	12	122	532	611	878	80	215	810
mmu-miR-196a-2-3p	50	158	33	94	13	67	161	208	398	38	221	594
mmu-miR-196a-5p	2602	7987	1493	4172	962	3191	10898	8720	12527	2790	11037	20659
mmu-miR-196b-3p	28	14	19	3	0	4	23	14	61	4	33	70
mmu-miR-196b-5p	1104	2639	456	2626	746	1944	4661	4285	6422	1871	6356	9855
mmu-miR-1970	0	1	0	2	0	0	0	5	6	0	0	2
mmu-miR-1971	0	0	0	0	0	0	0	1	2	0	0	1
mmu-miR-1981-3p	17	23	2	14	0	10	53	60	83	5	36	56
mmu-miR-1981-5p	151	158	91	101	17	91	574	510	713	48	218	447
mmu-miR-1982-3p	11	6	4	3	1	2	27	17	38	8	14	19
mmu-miR-1982-5p	0	0	0	1	0	0	2	4	2	0	1	2
mmu-miR-1983	4053	4958	1891	2456	385	2141	11553	14113	17380	2404	8857	15561
mmu-miR-199a-3p	112626	113959	61590	70026	12081	82936	224629	150763	218402	58600	240542	436912
mmu-miR-199a-5p	86783	83937	29689	52449	9205	39958	179547	149980	282277	57085	235287	357216
mmu-miR-199b-3p	54679	54683	30014	33754	5764	40702	111012	74565	107658	28734	116756	212910
mmu-miR-199b-5p	6337	4916	2496	4706	358	2250	10093	6224	14970	3459	15069	14866
mmu-miR-19a-3p	5133	6930	6899	6351	1878	5349	27743	27883	42487	6443	41916	43318
mmu-miR-19a-5p	145	102	33	143	60	47	84	53	261	192	219	298
mmu-miR-19b-1-5p	175	115	152	72	6	39	177	153	359	152	261	455
mmu-miR-19b-2-5p	0	0	0	0	0	0	0	0	0	1	0	0
mmu-miR-19b-3p	18616	23194	25320	24939	5922	19748	80286	88917	131728	22721	137930	119396
mmu-miR-1a-1-5p	0	0	0	1	0	0	0	0	2	0	0	0
mmu-miR-1a-2-5p	0	0	0	0	0	0	0	0	0	0	0	0
mmu-miR-1a-3p	6	9	4	5	0	2	10	11	22	2	13	30
mmu-miR-1b-3p	4	14	1	9	5	10	2	3	8	1	8	10
mmu-miR-1b-5p	1	2	0	0	0	1	4	2	5	0	2	4
mmu-miR-200a-3p	3	2	0	0	0	1	5	3	9	0	8	6
mmu-miR-200a-5p	0	0	0	0	0	0	0	0	0	0	0	0
mmu-miR-200b-3p	1	4	2	3	0	2	5	14	1	1	6	4
mmu-miR-200b-5p	0	0	0	0	0	0	0	0	1	0	0	0
mmu-miR-200c-3p	7	21	6	7	1	11	35	32	65	6	28	45
mmu-miR-200c-5p	0	0	0	0	0	0	0	0	0	1	0	0
mmu-miR-201-3p	0	0	0	0	0	1	0	0	2	0	0	0
mmu-miR-201-5p	4	6	1	3	0	0	4	2	2	0	5	5
mmu-miR-202-3p	0	0	0	1	0	1	0	1	4	0	1	0
mmu-miR-202-5p	0	2	0	1	0	0	1	1	0	0	6	2
mmu-miR-203-3p	24	25	14	11	0	18	57	51	68	12	38	76
mmu-miR-203-5p	1	2	2	0	0	0	0	0	1	1	2	2
mmu-miR-204-3p	0	0	11	0	0	1	0	7	0	1	6	6
mmu-miR-204-5p	1	2	3	0	0	0	4	4	5	2	1	0
mmu-miR-205-3p	0	0	0	0	0	0	0	0	1	0	0	0
mmu-miR-205-5p	3	4	4	7	1	8	10	9	12	1	15	8
mmu-miR-206-3p	1563	2001	718	998	212	1079	5774	5107	10480	645	2551	5065
mmu-miR-206-5p	1	3	1	6	0	8	9	6	13	2	5	8
mmu-miR-207	0	0	0	0	0	0	1	1	2	1	1	0
mmu-miR-208a-3p	0	0	0	0	0	0	0	0	0	0	0	0
mmu-miR-208a-5p	0	3	4	1	0	1	7	3	11	1	6	3
mmu-miR-208b-3p	1	0	2	0	0	2	1	0	2	1	2	0
mmu-miR-208b-5p	0	0	0	0	0	0	0	0	0	0	0	0
mmu-miR-20a-3p	75	191	84	149	32	93	340	312	383	73	478	443
mmu-miR-20a-5p	15888	29158	17070	27814	8216	25971	39153	106635	165765	10552	57189	95694
mmu-miR-20b-3p	0	0	0	0	0	0	0	0	0	0	0	0
mmu-miR-20b-5p	10	18	4	16	3	12	21	57	100	12	31	65
mmu-miR-210-3p	5824	6162	2992	4205	1080	4382	12761	14222	21133	3990	12927	22425
mmu-miR-210-5p	91	120	50	58	13	94	171	169	462	59	321	307
mmu-miR-211-3p	1	0	2	0	0	0	0	1	0	0	0	0
mmu-miR-211-5p	0	0	0	0	0	0	2	1	0	0	1	0
mmu-miR-212-3p	81	206	116	116	22	99	356	339	491	124	348	618
mmu-miR-212-5p	170	186	74	82	14	101	252	285	402	80	268	484
mmu-miR-2136	0	0	0	1	0	0	0	0	0	0	0	0
mmu-miR-2137	188	901	211	1660	384	467	976	1141	2588	598	3368	3033
mmu-miR-2139	0	0	0	0	0	0	0	0	0	0	0	0
mmu-miR-214-3p	2658	3143	1689	3222	654	1641	6321	7330	9475	2822	9029	9817
mmu-miR-214-5p	3876	3572	2088	5027	481	2061	7158	5599	8923	4121	17534	16455
mmu-miR-215-3p	0	0	1	1	0	0	3	0	0	1	0	1
mmu-miR-215-5p	6	16	6	11	4	10	33	34	37	5	33	46
mmu-miR-216a-3p	1	1	1	0	0	0	3	2	1	0	0	0
mmu-miR-216a-5p	0	0	0	0	0	0	0	0	0	0	0	2
mmu-miR-216b-3p	0	0	0	0	0	0	0	0	1	0	0	0
mmu-miR-216b-5p	0	0	0	1	0	0	0	1	0	0	0	0
mmu-miR-216c-3p	0	1	0	0	0	0	0	0	0	0	0	1
mmu-miR-216c-5p	1	2	2	0	0	0	4	0	2	1	3	3
mmu-miR-217-3p	0	0	0	0	0	0	0	0	0	0	0	0
mmu-miR-217-5p	1	1	0	0	0	0	0	4	0	0	1	3
mmu-miR-218-1-3p	176	116	62	86	16	86	75	61	191	89	291	186
mmu-miR-218-2-3p	8	8	18	5	1	4	18	10	12	1	16	33
mmu-miR-218-5p	5960	8361	3228	3841	953	3799	8559	7240	13939	3331	10519	16410
mmu-miR-2183	0	0	0	0	0	0	0	0	0	0	1	0
mmu-miR-219a-1-3p	49	31	15	15	4	13	69	63	72	13	64	90
mmu-miR-219a-2-3p	0	0	3	1	1	0	1	1	2	0	1	2
mmu-miR-219a-5p	18	20	61	14	2	13	77	385	163	11	64	187
mmu-miR-219b-3p	0	0	10	0	0	0	2	3	3	1	6	3
mmu-miR-219b-5p	0	0	0	0	1	1	1	5	2	0	1	1
mmu-miR-219c-3p	0	0	9	0	0	0	1	0	0	1	1	0
mmu-miR-219c-5p	4	1	0	4	0	0	11	9	5	2	4	8
mmu-miR-21a-3p	6969	4295	2479	1886	608	1439	4106	5185	9908	3583	8071	20723
mmu-miR-21a-5p	713785	1577711	402418	1129597	202942	817180	2043244	3237910	4023833	450243	3019836	4404690
mmu-miR-21b	2	4	3	2	13	6	5	6	5	0	11	19
mmu-miR-21c	0	2	2	0	0	1	0	5	0	4	2	3
mmu-miR-22-3p	111058	92411	57685	69306	18991	62665	189910	251813	359628	69970	136963	283893
mmu-miR-22-5p	802	1046	498	593	202	506	1154	1191	1858	945	2001	2386
mmu-miR-221-3p	60801	94212	33147	35817	4875	34798	167303	125957	312825	32694	137429	288796
mmu-miR-221-5p	338	762	91	646	225	771	856	1234	2812	269	1509	3276
mmu-miR-222-3p	50582	38358	19843	33780	5536	23253	139373	104759	160983	29461	88758	125452
mmu-miR-222-5p	781	1159	399	486	109	487	1064	1564	2363	473	1872	3757
mmu-miR-223-3p	7	2	0	1	0	0	16	7	31	3	6	18
mmu-miR-223-5p	1	0	0	0	1	0	0	2	2	0	4	1
mmu-miR-224-3p	21	12	7	9	0	6	20	17	48	4	21	38
mmu-miR-224-5p	1812	2436	1354	1015	223	1418	6695	4213	8052	746	3690	4144
mmu-miR-23a-3p	53609	98287	25519	22907	4789	19820	103174	93195	178857	38522	97492	168544
mmu-miR-23a-5p	466	682	134	191	29	235	711	730	877	211	682	1558
mmu-miR-23b-3p	20244	32285	8838	10252	1777	8078	47873	45516	67028	14329	53290	78661
mmu-miR-23b-5p	79	67	29	46	4	22	86	72	153	61	168	283
mmu-miR-24-1-5p	86	135	43	112	35	82	112	174	259	85	217	402
mmu-miR-24-2-5p	4180	5213	1885	3459	731	2494	8270	9554	15906	3047	8291	16821
mmu-miR-24-3p	51564	53084	31680	40908	8290	35148	102353	162342	121880	33177	105849	165516
mmu-miR-25-3p	45867	34757	23498	38613	8652	23431	70033	53342	95803	36738	70822	69648
mmu-miR-25-5p	2	10	3	4	0	3	16	24	20	5	11	41
mmu-miR-26a-1-3p	27	56	32	18	6	19	86	104	121	28	64	116
mmu-miR-26a-2-3p	124	157	52	120	17	47	217	123	213	58	482	277
mmu-miR-26a-5p	58005	85987	29867	46105	7547	32876	122362	138185	178149	37487	142708	197064
mmu-miR-26b-3p	61	69	39	48	11	31	173	103	170	42	193	187
mmu-miR-26b-5p	17410	18093	9244	12807	2361	6889	35436	37781	53948	11390	32934	63525
mmu-miR-27a-3p	48793	71290	25185	59581	23836	43208	152586	152759	253089	65248	92604	216101
mmu-miR-27a-5p	2553	2256	726	1423	247	793	3549	3792	5553	1353	4916	7983
mmu-miR-27b-3p	59011	80891	26720	54968	12591	43315	99098	160692	189009	38554	134553	231932
mmu-miR-27b-5p	942	1271	481	677	134	613	1426	1665	2477	641	2290	3598
mmu-miR-2861	0	0	0	0	0	0	1	0	2	3	1	1
mmu-miR-28a-3p	2003	3127	737	2250	522	1825	6182	15193	17484	1639	9896	14076
mmu-miR-28a-5p	11218	14211	5209	7294	1036	4289	15612	23259	35226	6399	19394	5822
mmu-miR-28b	4	9	5	3	0	2	6	14	26	5	17	3
mmu-miR-28c	184	166	80	91	16	57	176	193	328	72	282	252
mmu-miR-290a-3p	0	0	0	0	0	0	0	1	0	0	0	0
mmu-miR-290a-5p	0	0	0	0	0	0	2	2	2	0	1	1
mmu-miR-290b-3p	0	0	0	0	0	0	0	0	0	0	0	0
mmu-miR-290b-5p	0	0	0	0	0	0	0	0	1	0	0	0
mmu-miR-291a-3p	0	0	0	0	0	0	0	0	0	1	1	0
mmu-miR-291a-5p	0	1	0	0	0	0	0	1	0	0	1	0
mmu-miR-291b-3p	0	0	0	0	0	0	1	0	2	0	0	4
mmu-miR-291b-5p	0	0	2	0	0	1	0	3	1	0	2	0
mmu-miR-292a-3p	1	0	0	0	0	1	0	0	0	0	1	0
mmu-miR-292a-5p	1	0	0	1	0	0	0	0	0	0	0	2
mmu-miR-292b-3p	0	0	0	0	0	0	0	0	0	0	0	0
mmu-miR-292b-5p	0	1	0	0	0	0	2	0	0	0	0	0
mmu-miR-293-3p	1	0	0	2	0	0	2	0	1	1	3	6
mmu-miR-293-5p	0	0	0	0	0	0	0	0	1	0	0	0
mmu-miR-294-3p	0	0	0	0	0	1	0	1	1	0	0	0
mmu-miR-294-5p	0	0	0	0	0	0	0	0	0	0	1	0
mmu-miR-295-3p	0	0	1	0	0	0	1	1	1	0	1	1
mmu-miR-295-5p	0	1	0	0	0	0	0	0	0	0	0	0
mmu-miR-296-3p	3184	2524	1128	2377	342	1227	9737	8929	3812	1783	5414	9708
mmu-miR-296-5p	531	957	798	765	132	446	1811	1260	4489	750	1711	1726
mmu-miR-297a-3p	36	27	15	18	4	19	55	23	82	20	94	89
mmu-miR-297a-5p	50	75	32	98	14	55	127	72	214	21	152	304
mmu-miR-297b-3p	7	19	5	13	1	10	28	10	45	7	32	37
mmu-miR-297b-5p	27	36	21	37	3	24	38	45	79	21	95	161
mmu-miR-297c-3p	13	18	4	11	2	10	19	16	39	10	33	32
mmu-miR-297c-5p	4	13	2	4	2	7	12	3	34	5	17	36
mmu-miR-298-3p	53	98	15	40	12	19	128	57	150	45	93	92
mmu-miR-298-5p	105	117	70	149	23	65	265	427	417	146	442	360
mmu-miR-299a-3p	2191	2014	929	676	172	854	2605	2900	3827	207	2277	7508
mmu-miR-299a-5p	957	1094	416	469	76	412	1949	1593	3060	766	2201	3647
mmu-miR-299b-3p	0	2	1	0	1	0	1	0	0	1	5	3
mmu-miR-299b-5p	0	2	2	0	0	1	4	2	6	2	4	3
mmu-miR-29a-3p	616629	511964	160229	286232	52006	271803	904151	911872	1263977	255384	838825	1304755
mmu-miR-29a-5p	3848	2008	2583	1730	439	962	3617	3881	6675	1393	5930	11013
mmu-miR-29b-1-5p	862	815	635	594	168	461	1255	1215	613	464	1892	5198
mmu-miR-29b-2-5p	27	42	16	19	5	14	70	83	109	6	73	139
mmu-miR-29b-3p	108394	78287	43866	65375	17574	47904	35538	45104	222930	78375	211096	188035
mmu-miR-29c-3p	1272	1079	537	880	89	481	2239	1870	3262	586	2142	2991
mmu-miR-29c-5p	84	54	65	32	12	34	127	119	191	36	131	208
mmu-miR-300-3p	7312	6847	2921	4769	689	3061	16616	18609	25285	3639	12810	19369
mmu-miR-300-5p	146	87	158	46	14	41	157	147	300	122	235	326
mmu-miR-301a-3p	5520	4615	2808	3130	885	2418	11218	12668	20761	4875	14338	16662
mmu-miR-301a-5p	58	99	30	127	4	44	183	95	251	38	361	194
mmu-miR-301b-3p	146	151	85	66	16	56	253	231	449	158	364	456
mmu-miR-301b-5p	2	2	1	3	0	1	7	11	12	1	4	19
mmu-miR-302a-3p	0	0	1	0	0	0	0	0	0	0	0	0
mmu-miR-302a-5p	0	0	0	0	0	0	0	0	0	0	0	0
mmu-miR-302b-3p	0	0	0	0	0	1	1	0	0	0	0	0
mmu-miR-302b-5p	1	0	1	0	0	0	1	0	0	1	0	0
mmu-miR-302c-3p	2	0	0	0	0	0	0	0	0	0	0	0
mmu-miR-302c-5p	0	0	0	0	0	0	0	0	0	0	0	0
mmu-miR-302d-3p	0	0	0	0	0	0	0	1	0	0	0	0
mmu-miR-302d-5p	0	0	0	0	0	0	2	0	0	0	0	0
mmu-miR-3057-3p	21	16	10	23	2	22	52	54	80	14	31	54
mmu-miR-3057-5p	101	115	51	40	10	59	397	412	619	50	202	376
mmu-miR-3058-3p	8	11	3	7	1	6	27	23	35	6	23	26
mmu-miR-3058-5p	2	8	6	4	1	3	15	34	25	3	7	14
mmu-miR-3059-3p	0	0	0	0	0	0	0	0	0	0	0	0
mmu-miR-3059-5p	1	0	0	0	0	0	1	1	2	0	0	0
mmu-miR-3060-3p	7	11	3	4	0	4	20	28	36	2	16	29
mmu-miR-3060-5p	0	1	0	0	0	0	0	1	0	1	0	2
mmu-miR-3061-3p	11	21	10	14	1	6	48	32	57	15	36	53
mmu-miR-3061-5p	20	24	11	8	1	11	19	34	36	13	53	82
mmu-miR-3062-3p	0	0	0	0	0	0	0	0	0	0	0	0
mmu-miR-3062-5p	11	12	1	3	0	1	24	28	23	2	10	20
mmu-miR-3063-3p	1	3	1	4	0	1	5	8	7	0	1	13
mmu-miR-3063-5p	0	1	1	2	0	0	2	0	4	0	1	2
mmu-miR-3064-3p	3	7	2	4	0	3	10	15	32	1	10	28
mmu-miR-3064-5p	8	18	8	9	1	3	39	36	14	6	23	31
mmu-miR-3065-3p	0	0	0	0	0	0	0	0	0	0	0	0
mmu-miR-3065-5p	1	3	1	0	0	0	2	3	8	1	1	5
mmu-miR-3066-3p	4	7	3	3	0	5	12	21	30	4	15	19
mmu-miR-3066-5p	46	33	13	30	1	11	64	67	98	15	61	93
mmu-miR-3067-3p	0	0	0	1	0	0	0	0	0	1	0	0
mmu-miR-3067-5p	0	0	0	0	0	0	0	1	0	0	3	0
mmu-miR-3068-3p	140	157	67	60	12	75	296	428	519	62	250	456
mmu-miR-3068-5p	827	992	337	631	69	396	2073	2280	2394	476	2121	2700
mmu-miR-3069-3p	0	1	1	1	0	3	7	7	10	2	0	8
mmu-miR-3069-5p	0	1	2	1	0	1	5	9	8	2	4	15
mmu-miR-3070-2-3p	4	9	4	3	2	2	7	10	9	0	3	8
mmu-miR-3070-3p	19	16	9	6	1	1	20	23	39	9	26	52
mmu-miR-3070-5p	1	0	8	4	1	1	1	4	5	1	7	3
mmu-miR-3071-3p	0	0	1	0	0	0	0	0	0	0	0	0
mmu-miR-3071-5p	0	0	0	1	0	0	0	0	0	0	0	0
mmu-miR-3072-3p	43	159	19	17	8	6	108	59	210	15	83	122
mmu-miR-3072-5p	32	33	34	23	7	19	60	77	29	13	64	64
mmu-miR-3073a-3p	2	0	0	0	0	0	1	0	2	0	0	0
mmu-miR-3073a-5p	0	0	0	0	0	0	0	0	0	0	0	0
mmu-miR-3073b-3p	0	0	0	0	0	0	0	0	0	0	1	0
mmu-miR-3073b-5p	0	0	0	0	0	0	0	1	0	0	1	0
mmu-miR-3074-1-3p	8	9	4	6	1	2	35	40	48	7	19	48
mmu-miR-3074-2-3p	0	0	0	0	0	0	1	0	1	1	1	0
mmu-miR-3074-5p	14	27	7	12	1	4	53	52	76	13	56	47
mmu-miR-3075-3p	0	0	0	1	0	1	2	2	6	3	3	4
mmu-miR-3075-5p	12	10	10	11	2	9	44	40	29	4	19	37
mmu-miR-3076-3p	19	8	10	21	3	10	31	41	48	14	22	30
mmu-miR-3076-5p	1	4	3	2	1	2	12	9	12	3	11	1
mmu-miR-3077-3p	2	0	2	1	0	1	2	5	6	0	4	2
mmu-miR-3077-5p	0	0	2	0	0	0	2	5	2	0	0	2
mmu-miR-3078-3p	0	0	0	0	0	0	0	0	1	0	0	0
mmu-miR-3078-5p	0	0	0	0	0	0	0	0	0	0	0	0
mmu-miR-3079-3p	2	4	0	1	0	2	3	2	6	0	2	7
mmu-miR-3079-5p	2	8	3	6	0	6	11	12	12	4	10	19
mmu-miR-3080-3p	2	4	5	1	1	2	4	8	14	2	5	15
mmu-miR-3080-5p	12	5	15	5	0	1	11	16	13	6	12	23
mmu-miR-3081-3p	1	10	1	3	0	3	20	23	25	1	7	26
mmu-miR-3081-5p	0	0	0	0	0	0	0	1	0	0	0	0
mmu-miR-3082-3p	7	14	3	5	0	8	17	15	31	3	23	25
mmu-miR-3082-5p	0	3	6	1	1	3	6	12	13	1	3	13
mmu-miR-3083-3p	0	0	0	0	0	0	0	0	0	0	0	0
mmu-miR-3083-5p	0	0	0	0	0	0	0	3	2	0	0	1
mmu-miR-3084-3p	17	21	10	9	0	15	58	58	63	17	51	82
mmu-miR-3084-5p	6	5	1	3	2	2	9	26	24	5	9	19
mmu-miR-3085-3p	0	0	1	0	0	0	0	0	0	0	0	0
mmu-miR-3085-5p	0	0	0	0	0	0	0	0	0	0	0	0
mmu-miR-3086-3p	1	0	0	1	0	0	1	0	2	0	0	2
mmu-miR-3086-5p	3	2	1	0	0	1	3	3	4	2	1	4
mmu-miR-3087-3p	0	0	1	0	0	0	0	0	0	0	1	1
mmu-miR-3087-5p	0	0	0	0	0	1	0	1	0	1	0	0
mmu-miR-3088-3p	0	1	0	0	1	0	1	2	2	0	3	6
mmu-miR-3088-5p	0	0	0	1	0	0	0	1	0	0	0	0
mmu-miR-3089-3p	32	17	5	9	3	7	34	31	34	14	27	39
mmu-miR-3089-5p	0	0	3	1	3	0	1	2	3	0	2	0
mmu-miR-3090-3p	0	0	0	0	0	0	0	0	0	0	0	0
mmu-miR-3090-5p	1	0	5	0	0	1	0	0	1	0	1	0
mmu-miR-3091-3p	14	19	3	13	5	11	39	32	40	14	32	37
mmu-miR-3091-5p	6	4	4	3	3	3	6	3	20	8	9	22
mmu-miR-3092-3p	4	8	2	17	1	7	26	20	71	5	27	37
mmu-miR-3092-5p	2	2	0	0	1	2	0	1	4	1	2	3
mmu-miR-3093-3p	0	0	0	0	0	0	2	1	1	0	1	1
mmu-miR-3093-5p	0	0	1	0	0	0	0	0	1	0	0	0
mmu-miR-3094-3p	1	0	1	1	0	0	1	1	4	0	3	1
mmu-miR-3094-5p	4	4	0	6	0	0	7	9	12	1	9	15
mmu-miR-3095-3p	48	49	26	17	1	21	142	117	196	17	71	134
mmu-miR-3095-5p	5	6	4	5	0	0	17	14	16	2	6	15
mmu-miR-3097-3p	0	1	1	2	0	0	0	0	2	0	1	5
mmu-miR-3097-5p	0	1	2	0	0	0	1	0	1	0	2	2
mmu-miR-3098-3p	9	6	3	11	2	6	18	17	26	11	22	17
mmu-miR-3098-5p	5	8	3	2	0	4	10	9	22	4	25	40
mmu-miR-3099-3p	0	0	0	0	0	0	0	0	0	0	0	0
mmu-miR-3099-5p	0	0	0	1	0	0	0	0	0	0	0	0
mmu-miR-30a-3p	2472	2945	1052	1502	280	1105	4479	5082	8008	1264	5067	8135
mmu-miR-30a-5p	23109	25627	12681	22750	3802	14285	38433	52931	70971	15229	43481	76527
mmu-miR-30b-3p	240	362	147	281	34	200	627	359	895	175	680	1107
mmu-miR-30b-5p	6365	6413	4306	5868	1214	3482	18609	20021	20079	5578	16866	14346
mmu-miR-30c-1-3p	98	112	60	148	20	73	137	78	169	92	208	37
mmu-miR-30c-2-3p	985	641	607	406	92	482	896	908	1182	645	1111	814
mmu-miR-30c-5p	10981	11109	6619	12027	1899	5958	34185	41474	36186	8676	29939	23990
mmu-miR-30d-3p	586	564	277	400	95	235	1165	1128	1854	377	1369	2299
mmu-miR-30d-5p	32973	39296	17930	27208	4551	22318	96595	131565	150146	21896	67768	106147
mmu-miR-30e-3p	965	1057	480	662	83	438	2152	2176	3518	572	2127	3590
mmu-miR-30e-5p	10787	11864	4963	8855	1581	6043	21752	27869	43054	7024	22444	44194
mmu-miR-30f	0	0	0	0	0	0	0	0	0	0	1	0
mmu-miR-31-3p	4386	3207	2777	1488	151	1273	3905	3998	27512	3405	5087	6746
mmu-miR-31-5p	3678	3787	2332	2258	595	2462	8057	10529	16655	2815	5325	13215
mmu-miR-3100-3p	0	0	0	0	0	0	1	2	3	0	0	2
mmu-miR-3100-5p	0	1	1	0	0	0	1	1	6	0	2	0
mmu-miR-3101-3p	3	0	1	0	0	0	1	1	1	0	4	4
mmu-miR-3101-5p	1	2	1	0	0	4	2	2	8	0	2	4
mmu-miR-3102-3p	72	111	53	31	5	25	215	205	532	18	139	212
mmu-miR-3102-3p.2-3p	39	38	19	28	5	16	133	89	148	17	76	112
mmu-miR-3102-5p	6	6	3	2	0	4	35	62	24	2	19	39
mmu-miR-3102-5p.2-5p	32	51	21	53	14	23	164	165	138	37	112	143
mmu-miR-3103-3p	0	1	0	3	0	0	2	3	2	0	1	3
mmu-miR-3103-5p	1	0	0	0	0	0	1	1	0	0	1	3
mmu-miR-3104-3p	0	0	0	1	0	0	0	0	0	0	0	1
mmu-miR-3104-5p	1	1	0	0	0	0	1	2	0	0	1	0
mmu-miR-3105-3p	72	70	26	16	10	20	188	189	286	29	119	164
mmu-miR-3105-5p	9	7	8	5	0	4	12	23	28	8	8	12
mmu-miR-3106-3p	0	0	0	0	0	0	0	0	0	0	0	0
mmu-miR-3106-5p	0	0	0	1	0	0	0	0	0	0	0	0
mmu-miR-3108-3p	7	4	1	0	0	3	7	4	7	2	4	6
mmu-miR-3108-5p	4	6	14	6	1	11	26	32	39	11	20	45
mmu-miR-3109-3p	16	16	8	8	0	13	43	59	65	24	52	79
mmu-miR-3109-5p	2	8	5	19	4	8	27	32	26	16	43	54
mmu-miR-3110-3p	1	3	0	3	0	1	5	5	5	0	12	17
mmu-miR-3110-5p	39	29	20	19	7	13	57	46	67	22	55	109
mmu-miR-3112-3p	2	2	2	5	1	5	6	1	5	0	4	2
mmu-miR-3112-5p	1	2	0	0	0	2	7	4	7	0	3	6
mmu-miR-3113-3p	0	0	0	1	0	0	0	0	0	0	0	0
mmu-miR-3113-5p	5	6	1	3	0	0	1	3	8	1	11	4
mmu-miR-3154	7	2	3	1	0	3	15	8	21	0	8	4
mmu-miR-32-3p	92	73	33	60	9	26	124	96	147	53	190	153
mmu-miR-32-5p	3677	2567	1581	1673	741	1922	2456	1493	5773	2328	5938	6320
mmu-miR-320-3p	7243	6746	3779	4871	1272	3812	20050	22188	29201	5514	14399	16435
mmu-miR-320-5p	3	3	3	0	0	1	3	5	12	3	15	12
mmu-miR-322-3p	88	206	73	107	19	74	415	502	689	125	474	937
mmu-miR-322-5p	1778	2667	1544	2631	675	1513	3981	6047	15847	1714	6953	11551
mmu-miR-323-3p	369	487	220	153	24	184	908	747	1423	86	496	1277
mmu-miR-323-5p	18	18	18	10	3	11	28	20	31	3	51	62
mmu-miR-324-3p	1201	1137	522	826	179	506	2432	3023	4047	867	2322	5760
mmu-miR-324-5p	1449	1719	1218	1060	302	846	3042	3429	5540	1092	1812	11313
mmu-miR-325-3p	1	0	0	0	0	0	0	0	0	0	1	0
mmu-miR-325-5p	1	0	0	2	0	0	1	1	3	0	2	0
mmu-miR-326-3p	236	198	97	139	17	46	184	141	388	119	356	342
mmu-miR-326-5p	1	2	2	1	0	0	4	6	0	5	4	1
mmu-miR-327	0	0	2	0	0	0	0	0	1	0	0	0
mmu-miR-328-3p	1115	1900	657	715	102	445	3016	1602	4118	401	1967	3101
mmu-miR-328-5p	0	0	2	1	0	0	6	5	2	0	4	4
mmu-miR-329-3p	272	326	103	158	23	117	636	464	870	165	647	752
mmu-miR-329-5p	383	574	206	231	21	165	1425	876	2556	160	657	1914
mmu-miR-33-3p	209	222	147	204	27	81	267	298	712	209	491	581
mmu-miR-33-5p	1882	1592	292	1059	229	555	1182	886	3199	1648	3862	7669
mmu-miR-330-3p	21	27	19	18	9	17	72	80	138	9	41	64
mmu-miR-330-5p	10	13	4	20	3	7	56	66	116	10	32	66
mmu-miR-331-3p	1264	2513	962	964	164	627	3370	4226	8024	1108	4251	6430
mmu-miR-331-5p	293	230	124	117	54	128	561	468	695	105	467	821
mmu-miR-335-3p	54	77	18	41	8	34	219	205	206	28	152	150
mmu-miR-335-5p	115	132	54	135	20	58	170	258	359	163	489	415
mmu-miR-337-3p	204	302	167	140	27	101	279	276	444	408	523	309
mmu-miR-337-5p	249	269	286	381	63	315	434	1021	754	317	1009	116
mmu-miR-338-3p	3	11	9	3	0	3	4	6	9	2	50	20
mmu-miR-338-5p	2	7	1	0	1	0	1	1	3	1	1	4
mmu-miR-339-3p	137	273	62	162	40	156	405	489	750	46	375	629
mmu-miR-339-5p	961	1119	1045	600	137	577	3841	3235	4218	404	1500	2737
mmu-miR-340-3p	112	116	58	72	10	38	225	213	299	69	473	349
mmu-miR-340-5p	1324	845	491	761	181	303	2419	2834	4915	787	2320	5407
mmu-miR-341-3p	1726	980	715	774	155	467	1458	1651	2905	794	1890	3622
mmu-miR-341-5p	27	34	15	19	3	20	25	13	52	21	40	88
mmu-miR-342-3p	1562	1432	819	870	107	620	5438	4746	8874	717	3187	5686
mmu-miR-342-5p	77	91	43	69	17	66	253	308	400	31	157	264
mmu-miR-343	0	0	3	0	0	0	0	2	1	0	1	0
mmu-miR-344-3p	117	90	51	39	8	37	371	168	565	37	130	234
mmu-miR-344-5p	2	2	3	1	0	1	2	7	8	6	3	8
mmu-miR-344b-3p	187	137	86	92	22	106	342	330	469	132	216	419
mmu-miR-344b-5p	0	0	0	0	0	0	2	0	1	1	2	1
mmu-miR-344c-3p	49	72	27	34	10	33	85	100	143	50	132	251
mmu-miR-344c-5p	1	1	1	2	0	0	6	3	3	0	0	3
mmu-miR-344d-1-5p	3	1	0	3	0	0	4	6	6	1	1	5
mmu-miR-344d-2-5p	0	1	0	0	1	0	1	0	3	0	1	1
mmu-miR-344d-3-5p	14	17	5	8	1	6	38	40	56	14	12	57
mmu-miR-344d-3p	184	200	86	131	34	161	705	788	785	153	443	614
mmu-miR-344e-3p	0	0	0	1	0	0	0	0	0	0	0	0
mmu-miR-344e-5p	0	0	0	0	0	0	0	0	2	0	0	1
mmu-miR-344f-3p	0	0	0	0	0	0	0	0	0	0	0	0
mmu-miR-344f-5p	0	0	0	0	0	0	0	0	0	0	0	0
mmu-miR-344g-3p	0	0	0	0	0	0	0	0	0	0	0	0
mmu-miR-344g-5p	0	0	1	0	0	0	0	1	0	0	1	0
mmu-miR-344h-3p	0	0	0	0	0	0	0	0	0	0	0	0
mmu-miR-344h-5p	0	0	1	0	0	0	0	0	0	0	0	0
mmu-miR-344i	0	0	2	0	0	0	2	0	0	0	0	0
mmu-miR-345-3p	1200	998	602	903	250	645	2080	2287	3325	756	2046	3659
mmu-miR-345-5p	800	879	1120	578	132	433	1899	1483	3644	864	2514	2279
mmu-miR-346-3p	0	1	0	0	0	0	0	0	0	0	1	1
mmu-miR-346-5p	0	0	0	0	0	0	0	0	0	0	0	0
mmu-miR-3470a	29	41	14	23	5	18	75	100	93	35	83	76
mmu-miR-3470b	34	31	23	33	8	19	91	126	94	40	79	92
mmu-miR-3471	5	8	8	6	1	2	16	15	10	5	11	15
mmu-miR-3472	1	2	0	3	0	0	2	2	10	2	1	2
mmu-miR-3473a	2	1	3	5	0	2	5	4	7	4	16	5
mmu-miR-3473b	16	21	11	15	3	7	55	45	65	21	33	70
mmu-miR-3473c	0	0	1	0	0	0	0	1	0	0	1	0
mmu-miR-3473d	26	32	24	31	5	10	99	76	138	12	108	100
mmu-miR-3473e	1	0	3	2	2	3	7	1	1	0	5	5
mmu-miR-3473f	3	4	2	7	1	2	7	7	2	4	7	4
mmu-miR-3473g	4	5	2	2	0	1	14	14	17	1	7	5
mmu-miR-3474	1	4	4	0	0	0	8	4	2	0	5	4
mmu-miR-3475-3p	0	0	0	0	0	0	0	1	0	0	0	1
mmu-miR-3475-5p	0	0	0	1	0	0	0	0	0	0	0	0
mmu-miR-34a-3p	25	22	19	20	2	11	97	77	118	16	62	41
mmu-miR-34a-5p	1860	1474	1672	1064	268	780	5466	7115	11861	1083	3099	9132
mmu-miR-34b-3p	563	664	241	461	66	344	1344	884	1434	340	1491	1886
mmu-miR-34b-5p	967	1499	991	1081	272	482	2375	1741	8153	803	1845	10300
mmu-miR-34c-3p	178	193	89	121	38	133	340	254	470	193	370	562
mmu-miR-34c-5p	12499	12640	5239	10092	640	4467	17806	20440	31080	7529	26086	53342
mmu-miR-350-3p	2076	2270	899	1270	226	946	5002	4463	7444	1163	4488	6433
mmu-miR-350-5p	206	240	184	123	46	177	605	774	611	256	458	681
mmu-miR-351-3p	135	258	60	155	53	156	360	442	757	73	449	890
mmu-miR-351-5p	1136	2066	607	1348	204	786	10350	9482	16054	906	4066	5441
mmu-miR-3535	95	125	40	87	13	87	264	334	455	69	303	442
mmu-miR-3544-3p	0	0	1	0	0	0	0	0	0	0	0	0
mmu-miR-3544-5p	0	0	0	1	0	0	0	0	0	0	2	0
mmu-miR-3547-3p	0	0	0	0	0	0	1	0	1	1	1	0
mmu-miR-3547-5p	1	0	0	3	1	2	1	4	6	0	3	1
mmu-miR-3552	0	0	0	0	0	0	0	0	0	0	0	0
mmu-miR-3569-3p	1	2	0	4	0	3	2	1	4	0	0	1
mmu-miR-3569-5p	0	0	1	0	0	0	3	0	1	0	1	0
mmu-miR-3572-3p	2	3	0	6	0	2	11	14	15	1	2	14
mmu-miR-3572-5p	2	3	0	1	0	0	2	6	2	0	1	7
mmu-miR-361-3p	328	428	134	227	25	275	1885	931	1923	146	681	1064
mmu-miR-361-5p	3442	6081	1883	2536	638	2403	14923	16149	19994	2359	9595	11301
mmu-miR-3618-3p	1	4	2	2	0	3	6	4	8	2	6	9
mmu-miR-3618-5p	6	2	5	3	1	4	8	5	8	1	16	14
mmu-miR-362-3p	3626	4374	1821	2316	504	1620	6109	6448	9248	2629	5637	10064
mmu-miR-362-5p	1589	2447	928	1099	149	626	7069	5642	9952	944	3905	5451
mmu-miR-3620-3p	0	0	0	0	0	0	0	0	0	0	0	0
mmu-miR-3620-5p	0	0	0	0	0	0	0	0	0	0	0	3
mmu-miR-363-3p	0	0	2	0	0	0	0	0	0	0	0	0
mmu-miR-363-5p	0	0	0	0	0	0	0	0	0	0	0	1
mmu-miR-365-1-5p	9	22	9	7	4	11	62	31	86	8	38	46
mmu-miR-365-2-5p	77	271	44	93	29	87	273	413	615	42	232	447
mmu-miR-365-3p	3408	2388	1489	2146	427	1446	5858	3360	9376	1955	7816	4055
mmu-miR-367-3p	0	0	0	0	0	0	0	0	0	0	1	0
mmu-miR-367-5p	0	0	0	0	0	0	0	0	0	0	0	0
mmu-miR-369-3p	1650	1390	1035	941	147	632	3665	3239	7780	771	2688	4715
mmu-miR-369-5p	833	768	60	334	84	428	1419	1022	2073	160	1138	2225
mmu-miR-370-3p	534	801	250	516	61	293	1477	1277	1686	490	1118	2563
mmu-miR-370-5p	89	90	40	58	8	40	195	200	273	51	200	310
mmu-miR-374b-3p	0	0	0	0	0	0	0	0	0	0	0	0
mmu-miR-374b-5p	2619	2594	1768	2602	569	1702	4208	4997	4787	2078	5969	6762
mmu-miR-374c-3p	0	0	0	0	0	0	1	1	3	1	2	0
mmu-miR-374c-5p	7	9	5	15	1	24	6	16	13	11	11	17
mmu-miR-375-3p	3	2	1	1	0	0	7	4	12	0	4	4
mmu-miR-375-5p	0	0	0	0	0	0	0	0	0	0	0	0
mmu-miR-376a-3p	1923	2936	908	809	124	476	5384	4207	11375	1012	4394	7265
mmu-miR-376a-5p	392	111	206	259	34	150	435	559	700	281	842	717
mmu-miR-376b-3p	1323	1631	569	871	80	636	8756	9260	11690	1121	3711	3710
mmu-miR-376b-5p	929	1081	387	624	123	351	450	441	128	560	2455	1007
mmu-miR-376c-3p	605	1361	405	394	71	273	1347	1508	1760	456	1438	2479
mmu-miR-376c-5p	92	113	31	30	5	25	37	46	21	40	220	110
mmu-miR-377-3p	3571	4000	1462	1925	458	1383	3880	3150	6523	2918	6356	6121
mmu-miR-377-5p	58	102	35	88	14	67	118	219	173	64	147	201
mmu-miR-378a-3p	1614	2585	753	1630	278	1048	4264	5545	8631	804	4894	6508
mmu-miR-378a-5p	94	140	55	81	17	42	246	228	539	64	289	326
mmu-miR-378b	10	13	4	10	1	3	14	19	26	7	12	30
mmu-miR-378c	197	170	81	125	19	93	169	236	317	72	387	442
mmu-miR-378d	16	20	8	13	4	9	16	21	25	13	26	29
mmu-miR-379-3p	981	928	240	400	47	281	2012	1739	3164	243	1671	1664
mmu-miR-379-5p	14601	7380	5812	5564	1476	6902	18586	18094	24664	5552	20145	37890
mmu-miR-380-3p	786	1099	304	556	41	380	2470	2915	3868	451	1960	2515
mmu-miR-380-5p	328	307	147	154	40	172	316	391	487	141	482	723
mmu-miR-381-3p	333	2282	139	1758	489	1756	1459	3695	8686	250	2950	8375
mmu-miR-381-5p	41	44	17	12	3	8	61	49	130	73	58	126
mmu-miR-382-3p	1305	1196	391	350	55	396	2080	1806	3243	669	2322	3381
mmu-miR-382-5p	2229	4292	989	1723	333	2627	9743	10827	4066	1121	4734	11963
mmu-miR-383-3p	0	0	0	0	1	0	0	0	0	0	0	0
mmu-miR-383-5p	8	4	4	4	0	4	4	6	7	8	13	26
mmu-miR-384-3p	0	0	0	0	0	0	2	0	2	0	1	0
mmu-miR-384-5p	0	1	0	0	0	1	0	1	0	0	0	1
mmu-miR-3960	0	2	0	1	0	1	0	4	0	1	5	0
mmu-miR-3961	0	0	0	0	0	0	1	0	0	1	0	0
mmu-miR-3962	1	1	1	0	1	0	2	2	2	2	2	7
mmu-miR-3963	37	35	10	18	14	38	75	88	99	12	76	113
mmu-miR-3964	0	0	0	0	0	0	0	0	0	0	0	0
mmu-miR-3965	1	0	0	1	0	0	0	0	0	1	0	1
mmu-miR-3966	0	0	0	0	0	1	0	1	1	0	1	0
mmu-miR-3967	1	0	0	1	0	0	0	1	0	1	2	1
mmu-miR-3968	1439	1670	778	499	127	464	6222	3819	7366	855	2922	6557
mmu-miR-3969	0	0	1	0	0	0	1	0	0	0	0	0
mmu-miR-3970	9	4	3	2	0	0	3	3	11	2	3	10
mmu-miR-3971	0	0	0	0	0	0	0	0	0	0	0	0
mmu-miR-409-3p	3395	3459	1153	1173	168	982	12890	9160	15772	1587	5156	9923
mmu-miR-409-5p	1795	1710	791	981	198	749	3127	3086	4429	834	2898	4500
mmu-miR-410-3p	1764	1209	744	1257	268	917	4092	5343	8024	1273	2685	4043
mmu-miR-410-5p	70	136	28	54	7	36	117	121	110	20	106	243
mmu-miR-411-3p	1183	2389	835	698	125	633	6610	5904	8995	951	4936	5948
mmu-miR-411-5p	10961	12416	6166	7357	1165	7108	18181	19752	27089	7157	23277	34684
mmu-miR-412-3p	18	21	14	14	3	7	48	37	68	8	29	75
mmu-miR-412-5p	176	182	72	63	15	43	311	300	517	105	317	388
mmu-miR-421-3p	529	478	321	319	68	268	1273	1509	2134	258	1228	1827
mmu-miR-421-5p	21	24	15	16	1	6	26	23	36	17	71	75
mmu-miR-423-3p	3667	9427	3339	6449	962	4731	20720	20636	31763	3955	17857	26872
mmu-miR-423-5p	671	1362	500	246	44	611	3548	2165	3734	299	1024	1160
mmu-miR-425-3p	407	382	162	246	42	134	699	787	1119	96	904	1296
mmu-miR-425-5p	2248	3071	876	2574	315	1701	5951	7107	11477	1591	7461	12062
mmu-miR-429-3p	1	0	0	1	0	0	3	3	2	2	2	8
mmu-miR-429-5p	0	0	6	0	0	0	0	0	0	0	0	1
mmu-miR-431-3p	253	231	114	110	20	66	283	263	367	134	420	703
mmu-miR-431-5p	1859	1287	1022	977	219	627	2413	2804	3467	1338	3175	3965
mmu-miR-432	0	0	0	0	0	0	0	0	0	0	0	0
mmu-miR-433-3p	2036	2066	1001	1066	177	982	5516	3413	7501	984	3365	5192
mmu-miR-433-5p	156	196	59	90	9	54	306	423	526	65	354	557
mmu-miR-434-3p	3854	3276	2128	1963	232	1044	6479	4130	7465	1660	8208	7459
mmu-miR-434-5p	4105	6078	1742	851	258	2663	9298	10656	15491	2179	4146	18601
mmu-miR-448-3p	0	0	3	1	0	0	0	0	0	1	0	0
mmu-miR-448-5p	0	0	0	0	0	0	0	0	0	0	0	0
mmu-miR-449a-3p	17	5	10	3	2	2	5	4	10	4	6	20
mmu-miR-449a-5p	110	159	101	216	44	117	213	220	374	124	413	823
mmu-miR-449b	0	0	1	0	0	0	1	0	0	1	0	4
mmu-miR-449c-3p	0	0	0	0	0	0	0	0	2	0	2	1
mmu-miR-449c-5p	1	9	5	4	5	21	11	21	50	5	7	32
mmu-miR-450a-1-3p	42	23	15	15	2	18	52	58	68	19	66	106
mmu-miR-450a-2-3p	36	29	17	25	3	24	23	10	57	23	52	69
mmu-miR-450a-5p	819	1813	224	326	64	1027	3888	1089	5054	887	917	1464
mmu-miR-450b-3p	350	323	156	211	41	180	839	649	1021	219	634	1003
mmu-miR-450b-5p	402	452	220	398	75	283	1452	1403	1828	361	1127	1163
mmu-miR-451a	7	3	6	1	0	3	10	7	21	7	10	22
mmu-miR-451b	0	0	0	0	0	0	0	0	0	0	1	0
mmu-miR-452-3p	42	49	30	39	7	26	59	64	84	29	71	157
mmu-miR-452-5p	108	294	67	137	35	103	470	591	780	63	395	770
mmu-miR-453	0	0	0	0	0	0	0	0	0	0	0	0
mmu-miR-455-3p	122	345	106	68	17	79	561	747	878	100	567	1858
mmu-miR-455-5p	123	320	94	212	20	84	454	504	794	75	406	625
mmu-miR-463-3p	0	0	0	0	0	0	0	0	0	0	0	1
mmu-miR-463-5p	0	0	2	1	0	0	0	0	1	0	0	0
mmu-miR-465a-3p	0	0	0	0	0	0	0	1	2	0	0	2
mmu-miR-465a-5p	0	0	1	0	0	0	0	1	3	0	0	4
mmu-miR-465b-3p	1	0	0	0	0	1	2	1	3	0	1	0
mmu-miR-465b-5p	1	0	9	2	1	0	1	0	4	1	3	0
mmu-miR-465c-3p	0	0	0	0	0	0	3	0	1	0	4	2
mmu-miR-465c-5p	0	0	13	1	0	0	3	1	4	0	4	3
mmu-miR-465d-3p	0	0	0	0	0	0	0	1	0	0	1	0
mmu-miR-465d-5p	0	0	1	1	0	0	0	3	0	0	1	2
mmu-miR-466a-3p	41	48	29	13	4	27	78	69	129	12	107	188
mmu-miR-466a-5p	25	33	10	19	6	13	16	23	71	31	66	116
mmu-miR-466b-3p	296	310	226	200	42	191	575	592	901	174	891	1474
mmu-miR-466b-5p	123	101	50	114	25	75	99	106	209	81	242	489
mmu-miR-466c-3p	117	127	86	66	16	74	239	230	352	67	351	581
mmu-miR-466c-5p	259	251	94	264	50	159	192	119	466	248	628	752
mmu-miR-466d-3p	84	122	80	94	15	88	229	271	386	36	348	802
mmu-miR-466d-5p	7	6	4	2	1	0	6	5	25	8	6	36
mmu-miR-466e-3p	47	45	29	30	3	29	65	82	123	28	104	209
mmu-miR-466e-5p	6	9	6	12	5	4	7	9	20	9	31	52
mmu-miR-466f	2	4	4	6	2	2	4	7	8	5	14	26
mmu-miR-466f-3p	106	164	58	84	15	72	375	261	527	67	326	479
mmu-miR-466f-5p	19	7	17	12	5	5	11	16	15	5	36	67
mmu-miR-466g	8	32	10	8	1	10	54	82	94	15	38	95
mmu-miR-466h-3p	11	15	5	10	0	6	53	45	86	19	43	75
mmu-miR-466h-5p	102	81	40	69	15	43	137	85	163	69	195	409
mmu-miR-466i-3p	5	7	2	3	1	1	9	15	18	3	13	22
mmu-miR-466i-5p	13	9	1	12	3	2	33	24	22	5	17	45
mmu-miR-466j	3	2	0	3	1	1	6	1	9	1	7	10
mmu-miR-466k	18	19	9	16	3	20	30	24	91	4	58	117
mmu-miR-466l-3p	2	5	2	2	0	2	4	4	7	1	6	8
mmu-miR-466l-5p	0	0	1	0	0	0	1	1	4	0	2	4
mmu-miR-466m-3p	17	15	9	4	0	7	31	17	37	0	25	31
mmu-miR-466m-5p	2	2	0	1	0	1	2	2	13	4	5	8
mmu-miR-466n-3p	2	6	3	10	1	7	12	17	45	2	20	47
mmu-miR-466n-5p	11	3	2	2	1	1	2	3	18	2	6	25
mmu-miR-466o-3p	0	1	1	1	0	0	1	1	0	1	4	6
mmu-miR-466o-5p	12	9	10	18	4	10	11	12	29	8	40	63
mmu-miR-466p-3p	34	40	26	15	7	34	88	75	121	18	127	188
mmu-miR-466p-5p	22	31	9	12	6	10	36	19	76	12	56	113
mmu-miR-466q	0	0	2	1	0	2	0	1	1	6	2	4
mmu-miR-467a-3p	162	196	65	106	19	77	340	211	521	156	545	658
mmu-miR-467a-5p	2050	1906	949	1405	328	895	1013	3136	3506	2492	3968	5096
mmu-miR-467b-3p	1	2	0	0	0	3	0	1	2	1	1	3
mmu-miR-467b-5p	190	231	84	136	25	80	83	305	316	220	392	469
mmu-miR-467c-3p	2	5	1	4	2	1	8	7	5	4	19	15
mmu-miR-467c-5p	294	224	138	252	45	71	265	608	555	205	687	1644
mmu-miR-467d-3p	17	21	9	7	2	3	29	31	57	15	64	74
mmu-miR-467d-5p	253	224	62	125	31	47	92	301	361	102	878	1141
mmu-miR-467e-3p	20	9	6	13	1	6	13	11	20	7	29	22
mmu-miR-467e-5p	206	546	149	429	93	219	283	522	435	177	766	1062
mmu-miR-467f	0	0	0	0	0	0	0	0	0	0	2	0
mmu-miR-467g	0	1	0	0	0	0	0	0	1	1	1	1
mmu-miR-467h	1	0	0	0	1	0	1	0	2	1	1	1
mmu-miR-468-3p	0	0	0	1	0	0	1	0	1	0	0	0
mmu-miR-468-5p	0	0	0	0	0	0	0	0	0	0	0	0
mmu-miR-470-3p	0	0	0	0	0	0	0	0	0	0	0	0
mmu-miR-470-5p	0	0	0	0	0	0	2	0	3	0	3	0
mmu-miR-471-3p	0	0	1	0	0	0	0	0	0	0	0	1
mmu-miR-471-5p	0	0	0	0	0	2	2	0	1	0	0	1
mmu-miR-483-3p	0	0	0	0	0	0	1	0	0	0	0	0
mmu-miR-483-5p	0	0	0	0	0	1	0	0	1	0	0	0
mmu-miR-484	7003	9849	5113	4576	781	4982	20744	21164	34044	4339	16295	16754
mmu-miR-485-3p	327	344	162	190	36	147	1105	992	1750	208	776	842
mmu-miR-485-5p	467	537	251	423	56	294	515	205	766	155	860	1478
mmu-miR-486a-3p	6	13	8	5	2	5	15	10	12	3	25	46
mmu-miR-486a-5p	107	135	48	87	11	65	287	363	568	38	202	467
mmu-miR-486b-3p	0	2	0	1	1	0	0	0	1	0	1	4
mmu-miR-486b-5p	107	149	68	92	15	72	317	381	539	48	219	455
mmu-miR-487b-3p	408	458	71	228	30	158	855	778	1338	209	778	838
mmu-miR-487b-5p	2	8	3	2	1	1	1	6	17	0	10	19
mmu-miR-488-3p	0	0	0	0	0	0	0	0	0	0	0	1
mmu-miR-488-5p	0	0	0	0	0	0	0	0	0	0	0	0
mmu-miR-489-3p	0	0	0	0	0	0	0	0	0	0	1	1
mmu-miR-489-5p	18	9	3	86	9	8	7	6	30	225	81	8
mmu-miR-490-3p	0	1	0	0	0	0	1	0	1	1	0	0
mmu-miR-490-5p	0	0	0	0	0	0	0	0	1	0	0	0
mmu-miR-491-3p	4	11	3	8	0	6	16	12	15	3	22	21
mmu-miR-491-5p	57	41	15	52	11	23	97	120	25	27	95	81
mmu-miR-493-3p	56	50	38	50	12	39	98	123	219	34	121	241
mmu-miR-493-5p	259	337	70	105	20	110	424	307	749	69	371	718
mmu-miR-494-3p	149	829	721	865	92	962	3464	3791	2206	262	1826	2293
mmu-miR-494-5p	33	37	9	26	5	20	71	48	107	20	73	155
mmu-miR-495-3p	176	220	112	114	12	98	1106	1026	1725	86	481	639
mmu-miR-495-5p	19	14	37	7	3	8	16	34	68	24	28	41
mmu-miR-496a-3p	413	444	184	242	31	164	611	549	915	194	773	672
mmu-miR-496a-5p	12	33	12	5	0	1	7	12	14	3	18	24
mmu-miR-496b	0	1	0	0	0	0	0	0	0	0	1	0
mmu-miR-497a-3p	0	2	2	4	0	2	3	4	10	1	8	19
mmu-miR-497a-5p	646	597	301	391	59	298	700	816	278	303	960	2167
mmu-miR-497b	2	6	0	1	1	2	6	9	10	0	8	6
mmu-miR-499-3p	0	0	0	0	0	0	0	0	0	0	2	1
mmu-miR-499-5p	11	5	1	6	0	4	4	4	17	6	24	20
mmu-miR-500-3p	1282	1281	624	466	294	586	1431	1026	2720	1400	2846	3703
mmu-miR-500-5p	61	74	45	53	12	29	171	214	336	30	156	328
mmu-miR-501-3p	983	1933	694	748	193	823	5779	7024	8080	484	2477	3917
mmu-miR-501-5p	216	355	279	303	35	217	1693	1677	1777	150	840	1015
mmu-miR-503-3p	119	250	87	273	50	291	750	729	748	149	393	1243
mmu-miR-503-5p	2783	2085	1918	2860	663	1873	8023	7412	13482	2136	3322	6140
mmu-miR-504-3p	0	0	1	0	0	0	0	0	0	0	0	0
mmu-miR-504-5p	0	0	3	0	0	0	0	0	0	0	0	0
mmu-miR-5046	0	0	0	0	0	0	0	0	0	1	0	0
mmu-miR-505-3p	39	37	24	33	4	20	106	66	147	16	154	67
mmu-miR-505-5p	8	20	8	19	4	13	41	44	45	18	54	17
mmu-miR-509-3p	2	0	0	0	0	0	2	1	6	0	1	3
mmu-miR-509-5p	13	21	4	10	3	4	24	32	47	10	26	43
mmu-miR-5098	2	3	2	1	1	0	4	2	2	0	4	2
mmu-miR-5099	4398	5931	1461	2750	584	2402	10323	10588	18190	2709	7928	14023
mmu-miR-5100	13	22	8	12	4	19	55	54	87	16	51	84
mmu-miR-5101	5	3	1	2	0	0	6	5	12	2	10	22
mmu-miR-5103	5	6	3	4	3	5	43	39	45	3	12	24
mmu-miR-5104	0	0	0	0	0	2	1	1	2	0	0	1
mmu-miR-5106	1	1	3	1	0	0	2	6	9	1	5	3
mmu-miR-5107-3p	0	0	0	0	0	0	1	0	0	3	0	0
mmu-miR-5107-5p	0	0	0	0	0	0	0	0	0	0	0	0
mmu-miR-5108	0	0	0	0	0	0	0	0	1	0	0	0
mmu-miR-511-3p	2	3	0	0	0	2	2	4	3	0	2	6
mmu-miR-511-5p	0	2	1	0	0	0	3	0	6	0	1	5
mmu-miR-5110	1	0	0	0	0	0	0	0	0	0	3	0
mmu-miR-5112	0	0	0	0	0	0	0	0	1	0	0	0
mmu-miR-5113	11	28	11	21	4	11	64	5	97	5	25	23
mmu-miR-5114	0	0	0	0	0	0	0	0	0	0	0	0
mmu-miR-5116	0	1	0	2	0	0	4	0	1	0	0	0
mmu-miR-5118	0	1	4	2	1	2	0	1	2	3	2	0
mmu-miR-5119	1	3	1	1	0	1	1	11	9	1	5	6
mmu-miR-5120	0	0	0	1	0	0	0	1	1	1	1	0
mmu-miR-5121	42	42	27	28	4	27	68	31	150	36	110	200
mmu-miR-5122	1	7	3	2	0	2	8	9	15	5	10	18
mmu-miR-5123	17	28	10	10	2	3	43	43	53	5	26	43
mmu-miR-5124a	5	7	2	1	0	2	2	2	9	0	2	2
mmu-miR-5124b	0	0	0	0	0	0	0	0	0	0	1	0
mmu-miR-5125	8	10	3	5	0	1	10	5	26	2	14	23
mmu-miR-5126	5	31	4	42	9	32	107	121	110	27	166	154
mmu-miR-5127	0	0	0	0	0	0	0	0	0	0	1	0
mmu-miR-5128	13	14	3	11	3	5	69	75	87	12	26	35
mmu-miR-5129-3p	0	1	0	0	0	0	3	0	3	0	1	2
mmu-miR-5129-5p	0	0	1	1	0	0	0	1	2	0	2	1
mmu-miR-5130	0	5	1	3	1	1	3	1	5	2	3	7
mmu-miR-5131	0	1	0	0	0	0	0	0	1	0	2	1
mmu-miR-5132-3p	0	3	1	1	0	0	1	5	8	0	4	7
mmu-miR-5132-5p	10	7	6	3	1	5	24	34	49	2	20	32
mmu-miR-5133	1	1	0	2	1	0	3	5	3	0	4	5
mmu-miR-5134-3p	4	11	4	14	0	4	17	12	4	4	27	19
mmu-miR-5134-5p	0	0	0	2	0	0	3	1	5	0	2	1
mmu-miR-5135	0	1	1	0	0	2	4	1	2	5	1	2
mmu-miR-5136	0	0	0	1	1	0	1	0	1	0	0	0
mmu-miR-532-3p	963	1297	475	642	113	474	2877	1981	3406	585	1900	2560
mmu-miR-532-5p	2133	4501	1277	2426	342	1771	12209	8362	16524	1435	5899	10852
mmu-miR-539-3p	22	27	20	19	4	13	31	66	99	29	94	118
mmu-miR-539-5p	78	212	130	77	14	37	103	67	393	61	274	109
mmu-miR-540-3p	492	896	149	721	205	384	1882	1934	3177	395	1894	3852
mmu-miR-540-5p	67	159	40	101	19	86	95	102	367	73	183	393
mmu-miR-541-3p	229	314	68	120	20	92	385	391	586	129	258	830
mmu-miR-541-5p	9098	11824	3276	5394	761	4549	23788	27234	35872	4564	17818	33290
mmu-miR-542-3p	753	714	321	578	86	495	2094	2142	2777	440	1551	2439
mmu-miR-542-5p	73	97	67	46	9	47	170	195	295	75	228	207
mmu-miR-543-3p	1189	1334	497	551	85	531	7845	6635	9100	422	2872	5206
mmu-miR-543-5p	66	76	79	25	7	20	106	132	290	22	117	175
mmu-miR-544-3p	52	65	35	42	13	25	99	126	120	50	181	142
mmu-miR-544-5p	7	7	2	2	0	3	6	14	13	2	11	24
mmu-miR-546	0	0	0	0	0	0	0	0	1	0	2	0
mmu-miR-547-3p	12	16	6	10	1	7	12	38	20	10	25	52
mmu-miR-547-5p	1	0	0	0	0	0	0	0	0	0	0	0
mmu-miR-551b-3p	0	0	0	0	0	0	0	0	0	0	0	0
mmu-miR-551b-5p	0	0	0	0	0	0	0	0	0	0	0	0
mmu-miR-5615-3p	1	1	1	2	0	1	1	6	3	2	6	4
mmu-miR-5615-5p	0	0	1	0	1	0	2	3	0	0	5	3
mmu-miR-5616-3p	0	0	0	2	0	2	1	1	3	0	0	0
mmu-miR-5616-5p	0	1	1	0	0	1	0	0	4	0	2	1
mmu-miR-5617-3p	0	0	0	0	0	0	0	0	1	0	0	0
mmu-miR-5617-5p	0	2	0	1	0	0	2	1	3	0	2	1
mmu-miR-5618-3p	0	0	0	0	0	0	0	0	0	0	0	0
mmu-miR-5618-5p	0	0	0	0	0	0	0	1	0	0	0	1
mmu-miR-5619-3p	5	2	2	5	1	1	4	7	6	4	3	6
mmu-miR-5619-5p	4	5	7	2	1	2	10	6	16	5	11	20
mmu-miR-5620-3p	0	0	1	1	0	0	3	2	3	0	2	2
mmu-miR-5620-5p	0	6	0	0	0	0	6	7	6	1	2	6
mmu-miR-5621-3p	7	2	6	0	0	2	9	10	9	2	6	6
mmu-miR-5621-5p	0	0	0	0	0	0	1	1	1	1	2	2
mmu-miR-5622-3p	3	6	0	1	0	3	9	10	12	0	6	13
mmu-miR-5622-5p	2	2	1	5	0	3	2	5	7	2	8	11
mmu-miR-5623-3p	3	2	2	0	0	0	1	0	5	0	2	4
mmu-miR-5623-5p	0	1	1	0	0	0	2	3	1	3	8	4
mmu-miR-5624-3p	0	0	0	1	0	0	2	0	2	1	1	2
mmu-miR-5624-5p	0	2	0	0	0	0	0	0	1	0	0	0
mmu-miR-5625-3p	0	0	0	0	0	0	0	0	0	0	0	1
mmu-miR-5625-5p	0	0	0	0	0	0	0	0	0	0	1	0
mmu-miR-5626-3p	1	4	0	0	0	3	1	2	3	0	2	9
mmu-miR-5626-5p	4	1	0	2	0	1	3	5	6	1	4	8
mmu-miR-5627-3p	1	0	2	2	0	2	0	1	4	0	1	5
mmu-miR-5627-5p	2	2	2	0	0	3	9	15	10	3	3	13
mmu-miR-568	0	0	0	0	0	0	0	0	0	0	0	0
mmu-miR-5709-3p	5	3	2	2	1	1	9	1	6	1	6	7
mmu-miR-5709-5p	1	4	1	1	1	4	3	4	8	1	3	6
mmu-miR-5710	0	0	0	0	0	0	0	0	0	0	4	0
mmu-miR-574-3p	933	1566	518	685	124	552	2570	1911	3289	694	3407	4032
mmu-miR-574-5p	2325	1930	1083	1415	294	1075	4671	5440	7154	1124	3691	8945
mmu-miR-582-3p	73	52	5	1	1	6	179	164	170	15	66	156
mmu-miR-582-5p	299	418	124	201	29	120	711	745	1196	169	994	1295
mmu-miR-590-3p	0	0	0	0	0	0	0	0	0	0	0	0
mmu-miR-590-5p	0	0	0	0	0	0	0	0	0	0	0	0
mmu-miR-592-3p	0	0	1	0	0	0	0	0	0	0	0	0
mmu-miR-592-5p	1	1	0	1	0	0	3	0	2	2	0	8
mmu-miR-598-3p	381	330	89	167	18	132	904	702	1372	254	731	1240
mmu-miR-598-5p	2	13	5	1	0	0	13	8	10	2	25	27
mmu-miR-599	0	0	0	0	0	0	1	0	0	0	0	0
mmu-miR-615-3p	4237	4003	1717	1940	205	984	10326	8403	17659	2490	7526	11758
mmu-miR-615-5p	132	276	149	141	55	142	377	500	230	268	582	513
mmu-miR-6236	24	19	11	14	1	10	29	21	48	12	20	34
mmu-miR-6237	1	0	0	0	0	0	0	0	0	0	1	0
mmu-miR-6238	7	28	17	11	4	3	31	8	48	12	27	110
mmu-miR-6239	26	12	10	79	14	69	101	143	4	29	147	97
mmu-miR-6240	15	26	12	27	2	18	60	75	89	68	66	98
mmu-miR-6241	0	0	0	1	0	0	0	0	0	0	0	0
mmu-miR-6244	0	0	1	0	0	0	0	0	0	1	1	0
mmu-miR-6335	0	0	0	0	0	0	0	0	0	0	0	0
mmu-miR-6336	0	0	3	1	0	1	0	0	3	1	2	0
mmu-miR-6337	0	0	0	0	0	0	0	1	0	0	0	1
mmu-miR-6338	0	1	0	0	0	0	0	0	0	0	0	0
mmu-miR-6339	0	0	0	0	0	0	0	0	0	0	0	0
mmu-miR-6340	0	0	1	0	0	0	0	0	0	0	0	0
mmu-miR-6341	0	0	0	0	0	0	0	0	0	0	0	0
mmu-miR-6342	0	1	0	1	0	0	0	0	0	0	0	0
mmu-miR-6343	1	1	0	0	0	2	2	7	3	0	9	0
mmu-miR-6344	0	0	0	0	0	0	0	1	1	0	0	0
mmu-miR-6345	0	0	0	0	0	0	0	0	0	0	0	0
mmu-miR-6346	0	0	0	0	0	0	0	0	0	0	0	0
mmu-miR-6347	0	0	0	1	0	0	0	1	0	0	1	1
mmu-miR-6348	0	0	0	0	0	0	0	1	0	0	0	0
mmu-miR-6349	0	0	0	0	0	0	0	0	0	1	0	0
mmu-miR-6350	0	0	0	0	0	0	0	0	0	0	1	0
mmu-miR-6351	3	1	0	1	0	2	2	1	7	3	3	2
mmu-miR-6352	0	0	0	0	0	0	0	0	0	0	1	0
mmu-miR-6353	0	0	0	0	0	0	0	1	0	0	0	0
mmu-miR-6354	0	0	1	0	0	0	0	0	0	0	0	0
mmu-miR-6355	0	0	0	0	0	0	0	0	0	0	0	0
mmu-miR-6356	0	0	0	0	0	0	0	0	0	1	0	0
mmu-miR-6357	0	0	1	0	0	0	0	0	0	0	0	0
mmu-miR-6358	0	0	0	0	0	0	0	0	0	0	0	0
mmu-miR-6359	0	1	0	0	0	0	0	0	0	0	0	0
mmu-miR-6360	0	0	0	0	0	0	0	0	0	0	0	0
mmu-miR-6361	0	0	0	0	0	0	0	0	0	0	0	0
mmu-miR-6362	4	0	0	0	0	1	0	0	3	0	3	0
mmu-miR-6363	0	0	1	0	0	0	0	0	0	0	0	0
mmu-miR-6364	0	0	0	0	0	0	0	0	0	0	0	0
mmu-miR-6365	0	0	0	0	0	0	0	0	0	0	0	0
mmu-miR-6366	0	4	1	5	0	4	11	14	8	4	18	0
mmu-miR-6367	0	1	0	1	0	0	1	1	2	0	0	0
mmu-miR-6368	0	0	1	0	0	0	0	0	0	0	0	0
mmu-miR-6369	0	0	0	0	0	0	0	0	0	0	0	0
mmu-miR-6370	0	0	0	0	0	0	0	0	0	0	0	0
mmu-miR-6371	0	0	0	0	0	0	0	0	0	0	1	0
mmu-miR-6372	1	0	0	0	0	0	0	0	0	0	0	0
mmu-miR-6373	0	0	0	0	0	0	0	0	0	0	0	0
mmu-miR-6374	0	0	0	0	0	0	0	0	0	0	0	0
mmu-miR-6375	0	1	0	0	0	0	0	0	0	0	0	0
mmu-miR-6376	0	0	0	0	0	0	0	0	0	0	0	0
mmu-miR-6377	0	0	0	0	0	0	0	1	0	0	0	0
mmu-miR-6378	0	0	0	0	0	0	0	0	0	0	0	0
mmu-miR-6379	0	0	0	0	0	0	0	0	0	0	0	1
mmu-miR-6380	1	5	0	1	0	1	2	6	7	3	9	14
mmu-miR-6381	1	0	0	0	0	0	0	0	1	0	0	0
mmu-miR-6382	0	0	0	0	0	0	0	0	0	0	0	0
mmu-miR-6383	0	0	0	0	0	0	0	0	0	0	0	0
mmu-miR-6384	0	0	0	0	0	0	0	0	0	0	0	0
mmu-miR-6385	0	0	0	0	0	0	0	0	0	0	0	0
mmu-miR-6386	1	0	0	0	0	0	0	1	0	0	0	3
mmu-miR-6387	0	0	0	0	0	0	0	0	0	4	1	0
mmu-miR-6388	1	0	0	0	0	0	1	0	0	0	0	0
mmu-miR-6389	0	0	0	0	0	0	0	0	0	0	0	0
mmu-miR-6390	1	0	0	0	0	1	3	1	0	1	0	2
mmu-miR-6391	0	0	0	0	0	0	0	0	0	0	0	0
mmu-miR-6392-3p	0	0	1	0	0	0	0	0	0	0	0	0
mmu-miR-6392-5p	0	0	0	0	0	0	1	0	0	0	3	0
mmu-miR-6393	0	0	0	0	0	0	0	0	0	0	0	0
mmu-miR-6394	0	0	2	0	0	0	0	0	1	0	1	0
mmu-miR-6395	0	0	0	0	0	0	0	0	0	0	0	0
mmu-miR-6396	0	0	0	0	0	0	0	0	0	0	0	0
mmu-miR-6397	0	0	0	0	0	0	0	0	0	0	0	0
mmu-miR-6398	0	0	0	0	0	0	0	0	1	0	0	0
mmu-miR-6399	29	15	12	18	3	11	18	4	8	14	46	4
mmu-miR-6400	0	0	0	0	0	1	0	0	0	0	0	0
mmu-miR-6401	0	0	0	0	0	0	0	0	0	0	0	0
mmu-miR-6402	0	4	0	0	0	0	1	1	1	0	2	9
mmu-miR-6403	0	0	0	0	0	0	0	0	0	0	0	0
mmu-miR-6404	2	0	0	0	0	0	1	0	0	0	0	0
mmu-miR-6405	1	0	0	0	0	0	0	0	0	0	0	0
mmu-miR-6406	0	0	0	0	0	0	0	0	0	0	0	0
mmu-miR-6407	0	0	1	0	0	0	0	0	0	0	0	0
mmu-miR-6408	0	0	1	1	0	0	0	0	0	0	0	0
mmu-miR-6409	0	0	1	0	0	1	0	0	0	0	0	0
mmu-miR-6410	0	0	0	0	0	0	0	0	0	0	0	0
mmu-miR-6411	0	0	9	0	0	0	1	0	0	1	0	0
mmu-miR-6412	2	6	1	2	1	4	5	11	8	3	10	6
mmu-miR-6413	0	0	0	0	0	0	0	1	0	0	0	0
mmu-miR-6414	0	0	0	0	0	0	0	0	0	0	0	0
mmu-miR-6415	0	0	0	0	0	0	0	1	0	0	0	0
mmu-miR-6416-3p	0	0	0	0	0	0	0	0	0	0	0	0
mmu-miR-6416-5p	0	0	0	0	0	0	0	0	0	1	0	0
mmu-miR-6417	0	0	0	0	0	0	0	0	0	1	1	0
mmu-miR-6418-3p	11	16	5	15	1	4	45	33	73	9	32	31
mmu-miR-6418-5p	0	0	0	0	0	0	1	0	0	0	0	0
mmu-miR-6419	0	0	0	0	0	0	0	0	0	0	1	0
mmu-miR-6420	0	0	0	0	0	0	0	1	0	0	0	0
mmu-miR-6481	4	8	7	5	0	1	4	8	19	10	16	24
mmu-miR-6516-3p	1	2	0	2	0	2	5	14	15	2	10	10
mmu-miR-6516-5p	12	17	15	5	0	3	21	27	13	1	16	40
mmu-miR-652-3p	3802	2752	2444	3577	888	2126	10800	12390	15662	2704	3339	21545
mmu-miR-652-5p	20	33	28	13	2	3	76	45	135	32	41	153
mmu-miR-653-3p	2	0	0	0	1	1	2	0	1	1	3	0
mmu-miR-653-5p	0	1	0	1	0	0	2	1	0	0	0	1
mmu-miR-6537-3p	0	0	0	0	0	0	0	0	0	0	0	0
mmu-miR-6537-5p	0	0	0	0	0	0	0	0	0	0	0	0
mmu-miR-6538	3	4	2	6	2	4	6	11	20	22	10	15
mmu-miR-6539	293	243	116	59	28	129	451	573	726	152	446	882
mmu-miR-654-3p	0	0	1	0	0	0	2	2	2	0	0	0
mmu-miR-654-5p	1	0	0	0	0	0	0	0	0	0	0	0
mmu-miR-6540-3p	12	11	3	5	1	2	17	25	25	4	17	30
mmu-miR-6540-5p	30	39	14	21	7	33	45	85	91	18	61	112
mmu-miR-6541	0	0	0	0	0	0	0	1	0	0	0	0
mmu-miR-6546-3p	0	0	0	0	0	0	1	0	4	0	3	2
mmu-miR-6546-5p	3	3	1	2	0	1	2	7	5	0	2	4
mmu-miR-664-3p	118	155	60	105	20	87	344	243	382	75	318	301
mmu-miR-664-5p	40	109	26	69	11	35	224	300	496	27	228	374
mmu-miR-665-3p	1534	1106	686	1043	177	684	1843	1647	2883	1041	2701	741
mmu-miR-665-5p	29	15	14	10	6	6	26	22	47	22	46	46
mmu-miR-666-3p	206	146	38	44	9	22	20	15	55	83	93	90
mmu-miR-666-5p	309	355	127	241	51	136	551	611	929	127	538	888
mmu-miR-667-3p	413	317	216	141	29	111	603	540	1063	157	618	617
mmu-miR-667-5p	182	137	78	37	8	54	194	218	237	46	176	291
mmu-miR-668-3p	98	130	36	81	9	32	205	174	316	50	291	280
mmu-miR-668-5p	14	7	4	1	2	5	6	9	14	4	10	20
mmu-miR-669a-3-3p	52	29	25	31	4	26	33	36	88	58	98	82
mmu-miR-669a-3p	957	1070	730	1164	146	744	1803	1457	3080	1236	3570	3128
mmu-miR-669a-5p	628	560	302	523	82	264	658	807	1196	481	1357	1780
mmu-miR-669b-3p	16	17	4	9	1	5	15	5	14	8	27	19
mmu-miR-669b-5p	136	100	105	105	47	66	146	109	247	114	280	413
mmu-miR-669c-3p	3	4	1	1	0	1	3	10	7	3	17	12
mmu-miR-669c-5p	356	466	191	229	39	274	1226	928	821	230	793	1356
mmu-miR-669d-2-3p	0	1	2	1	0	1	0	1	2	0	8	4
mmu-miR-669d-3p	3	1	1	0	0	1	3	0	1	2	3	2
mmu-miR-669d-5p	274	320	103	147	34	99	449	478	417	155	514	1358
mmu-miR-669e-3p	5	7	2	2	0	0	7	9	18	4	20	22
mmu-miR-669e-5p	32	17	21	20	1	13	125	53	146	11	76	120
mmu-miR-669f-3p	79	96	41	84	17	71	170	123	247	78	263	309
mmu-miR-669f-5p	64	54	52	53	14	35	69	63	149	65	124	216
mmu-miR-669g	1	3	0	0	0	1	3	1	3	1	2	3
mmu-miR-669h-3p	1	2	1	1	0	0	2	0	5	1	2	4
mmu-miR-669h-5p	2	7	3	4	2	4	14	10	15	1	13	23
mmu-miR-669i	1	0	2	0	0	0	1	1	4	2	2	4
mmu-miR-669j	1	0	1	0	0	0	0	0	1	1	1	0
mmu-miR-669k-3p	0	0	1	1	1	1	0	0	0	1	0	1
mmu-miR-669k-5p	1	0	0	1	1	0	1	3	9	1	7	9
mmu-miR-669l-3p	5	10	4	1	1	3	7	3	17	5	9	8
mmu-miR-669l-5p	99	142	54	95	31	76	169	239	228	140	273	591
mmu-miR-669m-3p	11	3	0	7	0	3	16	9	22	1	26	16
mmu-miR-669m-5p	73	87	47	76	17	38	122	86	208	58	251	415
mmu-miR-669n	0	0	0	0	0	0	0	1	0	1	0	0
mmu-miR-669o-3p	82	97	52	118	11	65	144	126	285	110	337	299
mmu-miR-669o-5p	97	104	39	48	9	46	164	143	170	81	193	310
mmu-miR-669p-3p	8	20	5	14	1	7	15	19	29	13	34	25
mmu-miR-669p-5p	103	108	51	84	12	40	110	128	191	92	219	314
mmu-miR-670-3p	2	0	1	0	0	1	0	2	5	2	3	6
mmu-miR-670-5p	2	1	0	0	0	0	1	2	2	0	1	5
mmu-miR-671-3p	316	436	155	171	33	128	871	1024	1402	155	700	1008
mmu-miR-671-5p	231	342	173	223	54	107	293	455	897	123	559	1063
mmu-miR-6715-3p	0	0	0	0	0	1	0	0	0	0	0	0
mmu-miR-6715-5p	0	0	0	0	0	0	1	0	0	0	0	0
mmu-miR-672-3p	0	0	0	0	0	0	0	0	0	0	1	1
mmu-miR-672-5p	4	7	4	2	1	1	13	21	15	0	11	11
mmu-miR-673-3p	60	102	27	45	5	22	148	166	221	45	156	267
mmu-miR-673-5p	418	658	171	654	125	244	1005	968	1798	426	1326	2447
mmu-miR-674-3p	893	1360	421	598	104	504	2614	3335	3389	622	2212	3687
mmu-miR-674-5p	1337	1458	895	772	161	573	1491	1994	1185	509	2236	6551
mmu-miR-675-3p	7	8	7	8	0	7	8	11	21	8	22	29
mmu-miR-675-5p	4	20	9	7	1	6	8	5	6	5	15	25
mmu-miR-676-3p	967	1041	355	750	197	601	2101	1871	2725	887	1908	3524
mmu-miR-676-5p	107	156	81	114	18	82	290	190	326	80	292	384
mmu-miR-6769b-3p	0	0	0	0	0	0	0	0	0	0	0	0
mmu-miR-6769b-5p	0	0	0	0	0	1	0	0	1	0	1	2
mmu-miR-677-3p	10	5	2	2	1	1	20	37	20	6	13	21
mmu-miR-677-5p	25	31	11	23	3	13	63	69	136	15	58	101
mmu-miR-678	0	0	0	0	0	0	0	0	0	0	0	1
mmu-miR-679-3p	99	95	55	59	14	42	94	143	171	46	163	247
mmu-miR-679-5p	244	261	99	132	21	116	340	399	666	97	420	766
mmu-miR-680	0	0	0	0	0	0	2	0	0	0	0	1
mmu-miR-681	1	0	1	0	0	0	1	1	0	0	0	0
mmu-miR-682	0	0	1	0	0	0	0	0	0	0	0	0
mmu-miR-683	0	0	1	0	0	0	0	0	0	0	1	0
mmu-miR-684	0	0	0	0	0	0	0	0	0	0	1	0
mmu-miR-686	0	0	0	0	0	0	0	0	0	0	0	0
mmu-miR-687	0	0	2	1	0	0	0	0	0	1	0	0
mmu-miR-688	3	2	0	0	0	0	2	2	1	0	3	2
mmu-miR-6896-3p	0	0	0	0	0	0	0	0	1	0	0	0
mmu-miR-6896-5p	2	11	3	12	1	12	20	15	19	22	34	19
mmu-miR-6897-3p	0	0	0	0	0	0	0	0	0	0	1	0
mmu-miR-6897-5p	2	6	1	1	0	1	1	1	6	1	2	1
mmu-miR-6898-3p	0	0	3	0	0	0	1	1	2	0	0	2
mmu-miR-6898-5p	0	1	0	0	0	1	1	1	1	0	1	1
mmu-miR-6899-3p	2	2	0	1	0	0	2	1	4	1	5	0
mmu-miR-6899-5p	0	0	3	1	0	0	0	0	0	1	0	0
mmu-miR-690	54	49	20	33	6	10	116	126	145	36	127	161
mmu-miR-6900-3p	2	2	1	0	0	0	5	0	5	0	2	2
mmu-miR-6900-5p	2	1	0	0	0	1	1	3	4	0	5	4
mmu-miR-6901-3p	0	0	0	1	0	0	0	0	1	0	1	0
mmu-miR-6901-5p	0	1	2	0	1	0	1	1	2	0	2	5
mmu-miR-6902-3p	0	1	0	0	0	0	0	0	0	0	2	0
mmu-miR-6902-5p	1	1	0	0	1	1	1	2	0	0	0	0
mmu-miR-6903-3p	0	0	0	0	0	0	0	0	1	0	0	2
mmu-miR-6903-5p	0	0	0	0	0	0	0	1	3	0	0	1
mmu-miR-6904-3p	0	1	0	0	0	0	0	0	1	0	0	0
mmu-miR-6904-5p	0	0	2	0	0	0	1	0	2	1	0	5
mmu-miR-6905-3p	0	1	0	4	0	0	0	2	1	0	0	0
mmu-miR-6905-5p	2	1	1	1	0	0	1	1	3	0	1	3
mmu-miR-6906-3p	0	1	0	0	0	1	0	0	0	0	0	0
mmu-miR-6906-5p	1	0	0	0	0	0	0	0	0	0	0	0
mmu-miR-6907-3p	1	0	0	0	0	0	1	0	0	0	0	1
mmu-miR-6907-5p	0	2	1	13	0	0	0	0	0	0	0	0
mmu-miR-6908-3p	0	0	0	0	0	0	0	0	2	0	0	0
mmu-miR-6908-5p	0	0	0	0	0	0	0	1	1	1	0	0
mmu-miR-6909-3p	0	0	0	0	0	0	0	0	0	0	1	2
mmu-miR-6909-5p	0	7	0	2	1	0	13	4	14	1	7	7
mmu-miR-691	0	0	0	0	0	0	0	0	0	0	0	0
mmu-miR-6910-3p	0	0	2	1	0	0	1	0	0	0	2	0
mmu-miR-6910-5p	0	1	0	1	0	0	1	2	0	0	1	2
mmu-miR-6911-3p	0	2	0	2	0	1	4	2	6	2	1	3
mmu-miR-6911-5p	0	0	5	1	0	1	2	2	2	2	3	3
mmu-miR-6912-3p	0	0	0	0	0	0	1	0	0	0	0	0
mmu-miR-6912-5p	0	3	0	2	0	1	10	3	6	2	4	0
mmu-miR-6913-3p	0	0	0	1	0	1	1	2	0	0	0	1
mmu-miR-6913-5p	0	0	0	0	0	0	0	2	4	1	0	0
mmu-miR-6914-3p	2	5	1	2	0	3	5	2	13	4	8	4
mmu-miR-6914-5p	0	0	0	1	0	0	1	0	3	0	0	1
mmu-miR-6915-3p	0	0	0	0	0	1	0	0	0	0	1	0
mmu-miR-6915-5p	1	0	0	1	0	0	1	1	3	1	0	1
mmu-miR-6916-3p	0	0	0	0	0	0	0	0	2	0	0	0
mmu-miR-6916-5p	0	0	0	0	1	0	0	0	1	0	1	1
mmu-miR-6917-3p	0	0	0	0	0	0	0	0	0	0	0	1
mmu-miR-6917-5p	0	0	0	0	0	1	2	2	1	0	1	0
mmu-miR-6918-3p	0	0	0	1	0	0	0	0	0	0	0	0
mmu-miR-6918-5p	0	0	0	0	0	0	0	0	0	0	0	0
mmu-miR-6919-3p	0	0	0	0	0	0	0	0	0	0	0	0
mmu-miR-6919-5p	0	1	2	2	0	0	3	4	10	0	2	2
mmu-miR-692	0	0	3	0	0	0	0	0	2	0	1	1
mmu-miR-6920-3p	1	0	0	0	0	0	0	1	0	0	0	0
mmu-miR-6920-5p	0	0	1	0	1	0	1	1	1	0	0	1
mmu-miR-6921-3p	0	1	0	0	0	0	2	0	1	0	2	2
mmu-miR-6921-5p	0	0	0	0	0	0	0	0	0	1	0	0
mmu-miR-6922-3p	2	0	0	0	0	0	2	0	2	1	0	0
mmu-miR-6922-5p	0	0	0	0	0	0	1	0	1	0	1	1
mmu-miR-6923-3p	0	0	0	0	0	0	0	0	0	0	0	0
mmu-miR-6923-5p	0	1	0	0	0	0	0	0	1	0	0	1
mmu-miR-6924-3p	0	0	0	0	0	0	0	0	0	0	0	0
mmu-miR-6924-5p	0	0	1	0	0	0	0	0	1	2	0	0
mmu-miR-6925-3p	0	0	0	0	1	0	0	0	0	0	1	1
mmu-miR-6925-5p	0	1	0	0	0	1	0	0	0	0	0	2
mmu-miR-6926-3p	0	0	0	0	0	0	0	0	0	0	0	0
mmu-miR-6926-5p	0	0	0	0	0	0	0	0	1	0	0	0
mmu-miR-6927-3p	0	0	2	0	0	0	0	0	5	0	0	3
mmu-miR-6927-5p	1	1	1	0	0	1	0	0	0	0	2	0
mmu-miR-6928-3p	0	0	0	0	0	0	0	0	0	0	0	0
mmu-miR-6928-5p	0	0	0	0	0	0	0	0	0	0	0	0
mmu-miR-6929-3p	0	0	1	0	0	0	0	0	0	0	0	3
mmu-miR-6929-5p	0	0	0	0	0	0	1	1	1	0	0	0
mmu-miR-693-3p	7	9	4	2	2	1	8	6	22	4	6	56
mmu-miR-693-5p	0	0	0	0	0	0	1	0	3	2	0	3
mmu-miR-6930-3p	0	0	0	0	0	0	0	0	0	0	0	0
mmu-miR-6930-5p	0	0	0	0	0	0	1	0	0	0	1	0
mmu-miR-6931-3p	0	0	2	0	1	0	2	0	0	0	1	0
mmu-miR-6931-5p	0	1	2	0	0	0	3	6	1	1	4	3
mmu-miR-6932-3p	2	0	0	0	0	0	0	0	0	0	1	0
mmu-miR-6932-5p	2	2	0	1	0	0	0	4	1	1	6	4
mmu-miR-6933-3p	0	0	1	0	0	0	4	0	2	0	0	4
mmu-miR-6933-5p	0	4	1	2	0	1	5	4	5	3	1	2
mmu-miR-6934-3p	0	0	0	0	0	0	0	0	0	0	0	0
mmu-miR-6934-5p	0	0	0	0	0	0	4	0	0	0	0	0
mmu-miR-6935-3p	0	3	0	1	0	0	4	1	1	0	2	0
mmu-miR-6935-5p	10	6	7	6	2	3	4	6	15	7	23	16
mmu-miR-6936-3p	0	1	0	0	0	0	1	1	3	1	0	3
mmu-miR-6936-5p	0	0	1	1	0	0	0	0	0	1	1	1
mmu-miR-6937-3p	0	0	0	0	0	0	1	0	0	0	0	0
mmu-miR-6937-5p	23	32	21	31	3	31	111	93	88	15	70	142
mmu-miR-6938-3p	0	0	0	0	0	0	0	1	0	0	0	0
mmu-miR-6938-5p	0	0	0	0	0	0	0	0	0	0	0	0
mmu-miR-6939-3p	2	0	0	1	0	0	0	1	0	0	0	0
mmu-miR-6939-5p	2	0	1	0	0	1	0	1	2	0	1	1
mmu-miR-694	21	27	9	30	10	17	53	38	65	28	54	95
mmu-miR-6940-3p	0	0	1	0	0	3	0	3	5	1	6	4
mmu-miR-6940-5p	0	0	1	0	0	0	0	0	0	0	0	0
mmu-miR-6941-3p	0	0	0	0	0	0	0	0	0	0	0	0
mmu-miR-6941-5p	0	0	0	0	0	0	0	0	0	0	0	0
mmu-miR-6942-3p	0	0	0	1	0	0	1	0	0	0	0	0
mmu-miR-6942-5p	1	2	1	1	0	0	3	7	1	0	2	0
mmu-miR-6943-3p	0	1	0	1	0	1	4	0	0	2	0	0
mmu-miR-6943-5p	1	7	0	0	0	0	4	1	4	1	0	8
mmu-miR-6944-3p	9	7	2	14	0	4	48	30	48	3	23	21
mmu-miR-6944-5p	0	0	0	0	0	0	1	0	0	0	0	0
mmu-miR-6945-3p	13	10	3	8	2	2	36	21	41	2	14	25
mmu-miR-6945-5p	2	1	0	1	2	0	3	0	8	1	1	5
mmu-miR-6946-3p	0	0	0	0	0	2	0	1	2	0	0	1
mmu-miR-6946-5p	0	0	0	1	0	1	1	3	3	0	0	0
mmu-miR-6947-3p	0	0	0	1	0	0	0	0	0	0	0	0
mmu-miR-6947-5p	0	0	0	0	0	0	0	0	0	0	0	0
mmu-miR-6948-3p	2	5	1	1	0	0	5	4	12	0	6	5
mmu-miR-6948-5p	3	0	1	2	1	3	4	4	16	1	2	9
mmu-miR-6949-3p	0	0	0	0	0	0	0	0	1	0	0	0
mmu-miR-6949-5p	0	0	0	0	0	1	0	0	0	0	0	0
mmu-miR-695	0	0	1	0	0	0	1	0	0	0	0	0
mmu-miR-6950-3p	1	2	0	0	0	1	4	4	1	1	3	3
mmu-miR-6950-5p	1	2	2	0	0	0	1	3	0	1	4	6
mmu-miR-6951-3p	0	0	0	0	0	0	0	0	0	0	0	0
mmu-miR-6951-5p	9	15	2	2	2	2	20	7	13	3	11	28
mmu-miR-6952-3p	3	3	2	0	0	2	6	4	7	0	2	6
mmu-miR-6952-5p	0	0	0	2	0	0	2	2	2	0	4	6
mmu-miR-6953-3p	0	0	0	0	0	0	0	0	0	0	1	0
mmu-miR-6953-5p	0	0	0	0	0	0	0	0	0	0	0	1
mmu-miR-6954-3p	1	1	1	0	0	0	1	0	0	0	1	0
mmu-miR-6954-5p	1	2	34	0	0	0	3	2	7	0	0	3
mmu-miR-6955-3p	0	4	0	1	0	1	4	1	3	1	0	4
mmu-miR-6955-5p	2	3	1	2	1	1	7	9	8	1	5	3
mmu-miR-6956-3p	0	0	1	0	0	0	0	0	1	1	3	0
mmu-miR-6956-5p	0	0	0	1	0	0	1	0	2	0	0	0
mmu-miR-6957-3p	0	0	1	0	0	0	0	0	0	0	1	1
mmu-miR-6957-5p	0	0	1	0	0	0	1	0	0	0	1	1
mmu-miR-6958-3p	7	6	2	4	0	1	10	6	24	1	8	12
mmu-miR-6958-5p	0	0	0	0	0	0	0	0	1	0	0	1
mmu-miR-6959-3p	1	0	0	0	0	0	1	0	0	0	0	0
mmu-miR-6959-5p	4	3	3	0	0	0	3	7	19	2	2	3
mmu-miR-696	0	2	1	2	1	0	3	2	9	1	2	12
mmu-miR-6960-3p	0	1	0	0	0	0	0	0	0	0	0	0
mmu-miR-6960-5p	11	7	6	8	0	5	18	32	49	5	20	32
mmu-miR-6961-3p	0	0	0	0	0	0	0	0	0	0	0	0
mmu-miR-6961-5p	0	0	0	0	0	0	0	0	0	0	0	0
mmu-miR-6962-3p	0	0	0	0	0	1	0	0	0	0	2	2
mmu-miR-6962-5p	0	1	3	0	0	0	1	0	0	3	3	1
mmu-miR-6963-3p	1	3	1	1	0	1	3	6	11	1	1	7
mmu-miR-6963-5p	2	2	1	2	0	2	5	1	9	0	3	9
mmu-miR-6964-3p	0	0	0	0	0	0	0	0	0	0	1	0
mmu-miR-6964-5p	1	0	0	0	0	0	0	2	0	0	0	0
mmu-miR-6965-3p	1	0	0	0	0	0	1	1	2	0	2	2
mmu-miR-6965-5p	0	0	0	2	0	0	1	0	0	0	0	0
mmu-miR-6966-3p	0	0	0	1	0	1	3	2	4	1	1	1
mmu-miR-6966-5p	1	0	1	0	0	0	2	1	1	1	0	1
mmu-miR-6967-3p	2	3	1	0	0	0	2	4	9	0	4	5
mmu-miR-6967-5p	0	2	2	0	1	1	4	6	2	0	0	4
mmu-miR-6968-3p	0	0	0	0	0	0	3	1	0	0	1	0
mmu-miR-6968-5p	0	0	0	0	0	1	1	0	0	0	1	0
mmu-miR-6969-3p	0	0	0	0	0	0	0	0	0	0	0	0
mmu-miR-6969-5p	0	0	0	0	0	0	0	0	0	0	0	0
mmu-miR-697	0	0	0	0	0	0	0	0	0	0	0	0
mmu-miR-6970-3p	0	1	0	1	0	0	5	3	6	1	1	2
mmu-miR-6970-5p	1	0	0	1	0	2	9	5	9	1	3	5
mmu-miR-6971-3p	1	1	0	0	0	0	1	0	0	0	1	1
mmu-miR-6971-5p	0	0	0	0	0	0	2	0	0	0	2	1
mmu-miR-6972-3p	0	0	0	0	0	0	0	0	0	0	0	0
mmu-miR-6972-5p	0	0	0	0	0	0	0	0	0	0	0	0
mmu-miR-6973a-3p	0	0	0	0	0	0	0	0	0	0	0	0
mmu-miR-6973a-5p	0	0	0	1	0	0	0	0	0	0	0	0
mmu-miR-6973b-3p	0	0	0	0	0	0	0	0	0	0	0	0
mmu-miR-6973b-5p	0	0	0	0	0	0	0	0	0	0	0	0
mmu-miR-6974-3p	0	0	1	0	0	0	0	0	1	0	0	0
mmu-miR-6974-5p	1	1	1	1	0	1	3	3	4	3	5	2
mmu-miR-6975-3p	0	0	2	1	0	0	2	1	0	0	1	0
mmu-miR-6975-5p	0	1	0	0	0	0	4	3	1	0	0	0
mmu-miR-6976-3p	0	0	0	0	0	0	0	1	0	1	0	0
mmu-miR-6976-5p	0	0	2	0	0	0	1	1	3	2	4	5
mmu-miR-6977-3p	0	1	1	2	0	0	2	0	3	1	2	0
mmu-miR-6977-5p	0	0	0	0	0	0	0	2	0	0	0	1
mmu-miR-6978-3p	0	0	0	0	0	1	0	1	1	0	0	0
mmu-miR-6978-5p	0	0	0	0	0	0	0	0	0	0	0	0
mmu-miR-6979-3p	0	1	0	0	0	1	0	0	1	0	0	0
mmu-miR-6979-5p	0	0	0	0	0	0	0	0	0	0	0	0
mmu-miR-698-3p	1	0	1	0	0	0	0	0	0	0	0	0
mmu-miR-698-5p	0	0	1	1	0	1	0	4	3	2	0	4
mmu-miR-6980-3p	0	0	0	0	0	0	0	0	0	0	0	0
mmu-miR-6980-5p	0	0	0	0	0	0	0	0	0	0	1	0
mmu-miR-6981-3p	0	0	0	0	0	0	0	0	0	0	0	0
mmu-miR-6981-5p	1	0	0	0	0	1	0	1	0	0	3	0
mmu-miR-6982-3p	0	0	1	0	0	0	0	0	1	0	0	0
mmu-miR-6982-5p	0	0	0	0	0	0	0	0	0	0	0	0
mmu-miR-6983-3p	0	1	0	0	0	0	1	1	0	0	0	0
mmu-miR-6983-5p	0	0	1	1	0	0	0	0	0	0	0	0
mmu-miR-6984-3p	1	0	0	1	0	0	1	2	0	0	0	1
mmu-miR-6984-5p	0	0	0	0	0	1	1	3	1	0	0	1
mmu-miR-6985-3p	0	2	1	0	0	0	0	0	0	0	0	0
mmu-miR-6985-5p	0	0	0	0	0	0	0	0	0	0	0	3
mmu-miR-6986-3p	0	0	0	0	0	0	0	0	0	0	0	1
mmu-miR-6986-5p	3	1	0	3	3	1	10	5	4	2	8	0
mmu-miR-6987-3p	0	0	0	0	0	0	0	0	3	0	0	1
mmu-miR-6987-5p	1	1	0	0	0	0	3	1	3	0	1	3
mmu-miR-6988-3p	0	0	0	0	0	0	3	0	0	0	2	2
mmu-miR-6988-5p	1	0	0	0	0	0	3	3	1	0	3	2
mmu-miR-6989-3p	0	1	0	2	0	0	0	0	0	0	3	0
mmu-miR-6989-5p	0	0	0	0	0	0	2	0	2	0	0	1
mmu-miR-6990-3p	0	0	1	0	0	0	0	0	0	0	2	0
mmu-miR-6990-5p	0	0	0	0	0	0	1	1	3	0	0	4
mmu-miR-6991-3p	0	0	1	0	0	0	1	0	0	0	0	0
mmu-miR-6991-5p	1	0	0	1	0	0	1	1	1	0	1	1
mmu-miR-6992-3p	0	1	0	1	0	0	1	0	1	0	0	0
mmu-miR-6992-5p	12	9	12	4	2	3	11	20	17	5	14	28
mmu-miR-6993-3p	0	0	0	0	0	0	0	0	0	0	0	0
mmu-miR-6993-5p	0	0	1	0	0	0	0	0	0	0	0	0
mmu-miR-6994-3p	3	2	3	0	0	0	3	2	10	0	3	3
mmu-miR-6994-5p	5	2	0	7	1	3	5	5	10	1	3	3
mmu-miR-6995-3p	0	0	3	0	0	0	2	2	4	2	1	2
mmu-miR-6995-5p	0	2	1	2	0	0	10	3	10	0	3	5
mmu-miR-6996-3p	1	0	0	0	0	0	0	0	0	0	0	0
mmu-miR-6996-5p	0	0	2	1	0	0	0	1	0	0	2	3
mmu-miR-6997-3p	0	0	0	1	0	0	0	1	2	0	1	0
mmu-miR-6997-5p	0	1	0	0	0	1	4	5	4	2	1	1
mmu-miR-6998-3p	2	2	0	1	1	0	6	6	12	1	2	6
mmu-miR-6998-5p	0	0	0	0	0	0	0	0	0	0	0	0
mmu-miR-6999-3p	0	0	1	0	0	0	0	0	0	0	0	0
mmu-miR-6999-5p	0	0	0	0	0	0	0	0	0	0	0	0
mmu-miR-700-3p	174	308	105	165	48	98	909	950	1363	54	679	966
mmu-miR-700-5p	211	173	123	233	27	127	592	369	811	153	584	483
mmu-miR-7000-3p	0	1	0	0	0	0	0	0	1	0	1	0
mmu-miR-7000-5p	0	1	0	0	0	0	1	0	0	0	0	0
mmu-miR-7001-3p	0	0	0	0	0	0	0	0	0	0	0	0
mmu-miR-7001-5p	0	0	1	0	0	0	0	0	0	0	0	0
mmu-miR-7002-3p	0	0	0	0	0	0	0	0	0	0	0	0
mmu-miR-7002-5p	0	2	1	0	0	0	2	1	3	0	2	2
mmu-miR-7003-3p	0	0	0	0	0	0	0	0	0	0	0	0
mmu-miR-7003-5p	1	0	1	0	0	2	1	3	1	2	1	1
mmu-miR-7004-3p	0	0	0	0	0	0	0	1	0	0	0	0
mmu-miR-7004-5p	0	0	0	0	0	0	0	0	0	0	0	0
mmu-miR-7005-3p	0	0	0	0	0	0	0	0	1	0	0	0
mmu-miR-7005-5p	1	0	1	0	0	0	0	0	1	0	2	3
mmu-miR-7006-3p	0	0	0	0	0	0	0	0	0	0	0	0
mmu-miR-7006-5p	0	0	0	0	0	0	1	0	0	0	0	0
mmu-miR-7007-3p	1	1	1	2	0	2	4	3	2	4	4	0
mmu-miR-7007-5p	0	1	1	0	0	0	0	0	0	0	0	0
mmu-miR-7008-3p	0	0	1	1	0	0	0	2	0	1	1	0
mmu-miR-7008-5p	1	4	3	1	0	3	5	8	6	2	3	3
mmu-miR-7009-3p	1	0	0	0	0	0	0	2	4	0	2	2
mmu-miR-7009-5p	3	4	0	5	0	3	14	13	19	6	11	17
mmu-miR-701-3p	5	8	3	5	2	6	9	14	19	2	12	19
mmu-miR-701-5p	120	119	77	54	24	59	224	244	345	92	261	454
mmu-miR-7010-3p	0	1	3	1	0	3	1	1	1	0	3	0
mmu-miR-7010-5p	0	0	0	0	0	0	0	0	0	0	1	0
mmu-miR-7011-3p	0	0	0	0	0	0	0	0	0	0	0	0
mmu-miR-7011-5p	0	0	0	0	0	0	0	0	1	0	0	0
mmu-miR-7012-3p	0	1	0	0	0	0	0	0	2	0	0	0
mmu-miR-7012-5p	0	1	0	0	0	0	1	3	0	0	0	0
mmu-miR-7013-3p	0	0	3	0	0	0	2	1	1	0	1	2
mmu-miR-7013-5p	2	0	0	1	0	0	1	1	0	2	2	4
mmu-miR-7014-3p	0	0	0	0	0	1	0	0	0	0	0	0
mmu-miR-7014-5p	1	1	1	1	1	0	6	1	7	2	2	4
mmu-miR-7015-3p	1	0	0	0	0	1	1	0	2	1	0	2
mmu-miR-7015-5p	7	7	4	1	0	1	9	6	12	3	6	12
mmu-miR-7016-3p	0	0	0	0	0	0	0	0	1	0	0	0
mmu-miR-7016-5p	0	0	0	0	0	0	0	0	1	0	1	1
mmu-miR-7017-3p	0	1	0	0	0	0	1	0	0	0	0	2
mmu-miR-7017-5p	1	1	0	1	0	1	4	7	5	0	1	1
mmu-miR-7018-3p	5	9	5	8	4	5	19	29	45	5	23	39
mmu-miR-7018-5p	0	0	0	0	0	0	0	0	0	0	1	1
mmu-miR-7019-3p	0	0	0	0	0	0	2	0	2	0	1	1
mmu-miR-7019-5p	0	0	0	0	0	1	0	0	0	0	0	0
mmu-miR-702-3p	0	0	1	0	0	0	5	2	4	0	0	2
mmu-miR-702-5p	5	8	2	4	0	1	9	19	18	4	11	16
mmu-miR-7020-3p	0	0	0	0	0	0	0	0	0	0	1	0
mmu-miR-7020-5p	2	3	1	0	1	0	5	1	1	0	3	1
mmu-miR-7021-3p	0	0	0	0	0	0	0	0	0	0	0	0
mmu-miR-7021-5p	2	1	3	3	1	2	5	7	12	4	4	6
mmu-miR-7022-3p	0	1	0	2	0	1	0	1	0	0	2	1
mmu-miR-7022-5p	0	1	0	0	0	2	1	1	2	0	1	2
mmu-miR-7023-3p	0	0	0	0	0	0	0	0	0	0	0	0
mmu-miR-7023-5p	0	1	0	0	0	0	0	1	1	1	2	2
mmu-miR-7024-3p	0	0	1	0	0	0	1	0	1	3	1	1
mmu-miR-7024-5p	2	0	0	2	0	1	1	2	3	2	1	4
mmu-miR-7025-3p	18	17	10	18	0	12	25	26	49	13	39	53
mmu-miR-7025-5p	0	0	0	2	0	0	0	4	0	1	0	2
mmu-miR-7026-3p	0	0	0	0	0	0	0	1	0	0	0	0
mmu-miR-7026-5p	3	1	1	2	1	0	11	5	4	2	7	7
mmu-miR-7027-3p	1	0	0	0	0	0	0	0	0	0	0	0
mmu-miR-7027-5p	0	1	0	0	0	0	0	6	0	0	2	0
mmu-miR-7028-3p	0	0	1	0	0	0	0	0	0	0	0	0
mmu-miR-7028-5p	0	0	0	0	0	0	0	2	2	0	3	1
mmu-miR-7029-3p	0	2	4	0	0	2	6	2	6	0	2	3
mmu-miR-7029-5p	5	5	0	2	0	1	1	2	5	1	2	3
mmu-miR-703	0	0	0	0	0	0	0	3	0	0	0	1
mmu-miR-7030-3p	0	0	0	0	0	0	0	0	0	0	0	1
mmu-miR-7030-5p	0	2	1	0	0	0	3	2	1	0	0	0
mmu-miR-7031-3p	0	0	0	0	0	0	0	0	0	0	1	0
mmu-miR-7031-5p	0	0	0	2	1	0	3	1	3	0	5	2
mmu-miR-7032-3p	2	2	0	1	0	0	6	5	11	1	1	8
mmu-miR-7032-5p	0	0	0	0	0	0	2	0	3	0	1	0
mmu-miR-7033-3p	0	0	0	0	0	0	1	0	0	0	0	0
mmu-miR-7033-5p	11	15	7	12	3	2	41	48	33	8	18	24
mmu-miR-7034-3p	0	1	0	0	1	0	0	0	2	0	2	0
mmu-miR-7034-5p	0	0	0	0	0	0	2	2	3	1	2	1
mmu-miR-7035-3p	2	5	2	1	0	2	6	5	5	2	2	5
mmu-miR-7035-5p	1	0	0	1	1	0	0	0	2	0	3	2
mmu-miR-7036a-3p	0	0	1	0	0	0	1	0	0	0	2	1
mmu-miR-7036a-5p	2	3	0	1	0	1	7	3	2	0	2	3
mmu-miR-7036b-3p	1	1	2	0	0	1	4	1	1	0	1	0
mmu-miR-7036b-5p	3	3	0	1	0	0	1	6	4	0	10	3
mmu-miR-7037-3p	0	0	0	1	0	0	0	0	4	0	2	0
mmu-miR-7037-5p	0	1	0	0	0	0	1	0	0	0	0	0
mmu-miR-7038-3p	0	0	1	0	0	0	0	1	1	0	1	0
mmu-miR-7038-5p	1	2	0	0	1	2	2	4	6	0	2	8
mmu-miR-7039-3p	0	0	0	0	0	0	0	0	0	0	0	0
mmu-miR-7039-5p	2	2	2	1	0	0	0	5	5	2	1	1
mmu-miR-704	3	3	2	4	0	2	10	18	24	1	8	14
mmu-miR-7040-3p	0	0	0	1	0	1	0	0	0	0	1	0
mmu-miR-7040-5p	0	2	0	0	0	1	2	1	3	3	0	2
mmu-miR-7041-3p	0	0	0	0	0	0	0	1	2	0	1	0
mmu-miR-7041-5p	2	3	0	0	0	0	5	6	11	1	2	5
mmu-miR-7042-3p	0	0	0	0	0	0	1	1	1	2	1	0
mmu-miR-7042-5p	4	3	0	1	0	0	6	7	4	1	1	5
mmu-miR-7043-3p	31	29	9	8	5	22	90	36	86	17	68	73
mmu-miR-7043-5p	0	0	1	2	0	0	1	0	0	0	0	0
mmu-miR-7044-3p	0	0	0	0	0	0	0	1	0	0	0	0
mmu-miR-7044-5p	0	1	0	1	0	0	3	2	0	5	1	4
mmu-miR-7045-3p	1	0	0	0	1	0	0	0	1	0	5	0
mmu-miR-7045-5p	1	3	0	0	0	0	0	2	0	0	1	0
mmu-miR-7046-3p	0	0	0	0	0	0	0	0	2	0	1	0
mmu-miR-7046-5p	2	0	1	0	0	0	2	5	3	3	1	0
mmu-miR-7047-3p	0	0	0	0	0	0	0	0	0	0	1	0
mmu-miR-7047-5p	1	2	5	12	1	17	44	51	26	4	24	39
mmu-miR-7048-3p	0	0	0	0	0	0	0	0	0	0	0	0
mmu-miR-7048-5p	0	0	2	0	0	0	0	0	0	1	0	0
mmu-miR-7049-3p	0	0	0	0	0	0	0	0	0	0	0	0
mmu-miR-7049-5p	0	0	1	1	0	0	1	1	0	3	0	2
mmu-miR-705	0	2	2	1	0	1	4	3	0	2	3	3
mmu-miR-7050-3p	0	0	0	0	0	0	0	0	0	0	1	0
mmu-miR-7050-5p	0	0	0	0	0	1	0	0	0	0	2	0
mmu-miR-7051-3p	0	0	0	0	0	0	0	0	0	1	0	1
mmu-miR-7051-5p	1	0	1	1	0	0	2	5	4	1	2	5
mmu-miR-7052-3p	0	0	0	0	0	0	0	0	0	0	1	0
mmu-miR-7052-5p	1	4	0	2	0	0	4	2	4	1	5	4
mmu-miR-7053-3p	1	0	0	0	1	0	0	0	0	0	0	0
mmu-miR-7053-5p	0	0	0	0	0	0	0	0	0	0	0	0
mmu-miR-7054-3p	0	1	0	0	0	0	0	0	0	0	0	0
mmu-miR-7054-5p	2	1	3	1	0	0	7	3	5	1	1	2
mmu-miR-7055-3p	0	0	0	0	0	0	0	0	0	0	0	0
mmu-miR-7055-5p	0	0	0	0	0	0	1	1	0	0	0	1
mmu-miR-7056-3p	0	0	0	0	0	0	0	0	0	0	0	0
mmu-miR-7056-5p	0	0	0	0	0	0	0	0	0	0	0	0
mmu-miR-7057-3p	1	3	0	1	0	1	8	7	8	2	4	4
mmu-miR-7057-5p	0	0	0	0	0	0	0	2	0	0	1	0
mmu-miR-7058-3p	2	0	0	0	0	0	0	0	1	1	4	1
mmu-miR-7058-5p	0	0	0	0	0	0	0	0	0	0	1	0
mmu-miR-7059-3p	0	0	0	0	0	0	0	0	0	0	0	0
mmu-miR-7059-5p	0	0	0	0	0	0	1	1	1	0	2	1
mmu-miR-706	4	4	1	3	0	0	3	8	7	2	9	12
mmu-miR-7060-3p	0	0	0	0	0	0	0	0	0	1	0	0
mmu-miR-7060-5p	1	1	0	0	0	0	2	0	1	0	0	4
mmu-miR-7061-3p	0	0	1	1	0	0	1	0	1	0	1	0
mmu-miR-7061-5p	1	1	0	1	0	1	5	5	5	0	0	3
mmu-miR-7062-3p	0	0	0	0	0	0	0	0	2	0	0	0
mmu-miR-7062-5p	2	1	1	0	1	1	3	3	0	1	7	0
mmu-miR-7063-3p	0	0	0	0	0	0	0	0	1	1	1	0
mmu-miR-7063-5p	4	3	3	1	0	0	10	5	7	2	6	4
mmu-miR-7064-3p	0	0	0	1	0	0	0	2	0	0	0	0
mmu-miR-7064-5p	1	1	0	0	0	0	1	2	8	5	17	0
mmu-miR-7065-3p	0	1	0	2	0	0	0	0	0	0	0	0
mmu-miR-7065-5p	1	0	3	0	0	0	2	1	0	0	1	0
mmu-miR-7066-3p	0	0	2	0	0	0	0	0	0	0	1	0
mmu-miR-7066-5p	0	0	0	0	0	0	0	1	0	0	0	0
mmu-miR-7067-3p	0	0	0	0	0	0	0	0	1	2	0	0
mmu-miR-7067-5p	0	0	0	0	0	0	0	0	0	0	0	1
mmu-miR-7068-3p	4	5	2	0	0	1	5	1	8	1	7	7
mmu-miR-7068-5p	2	1	0	3	0	3	5	3	4	0	2	2
mmu-miR-7069-3p	0	2	1	2	0	0	10	5	3	2	5	2
mmu-miR-7069-5p	1	4	1	0	0	1	11	7	11	0	8	10
mmu-miR-707	0	0	0	0	0	0	0	0	1	0	0	0
mmu-miR-7070-3p	3	2	0	0	0	0	3	1	3	0	0	2
mmu-miR-7070-5p	1	1	1	0	1	0	5	2	2	0	3	1
mmu-miR-7071-3p	3	0	1	1	0	0	0	3	6	0	1	4
mmu-miR-7071-5p	0	1	0	1	0	0	1	3	2	1	1	1
mmu-miR-7072-3p	0	0	0	0	0	0	0	0	1	0	0	0
mmu-miR-7072-5p	0	0	0	0	0	0	0	0	1	0	0	0
mmu-miR-7073-3p	0	0	0	0	0	0	0	0	0	0	0	0
mmu-miR-7073-5p	3	7	0	3	0	2	8	4	7	1	5	10
mmu-miR-7074-3p	0	0	0	0	0	0	5	1	9	1	2	3
mmu-miR-7074-5p	0	0	0	0	0	0	0	0	0	0	0	0
mmu-miR-7075-3p	1	0	2	0	0	0	0	0	0	0	0	1
mmu-miR-7075-5p	2	1	1	2	0	0	2	0	1	0	0	3
mmu-miR-7076-3p	1	0	0	0	0	0	0	0	0	0	0	0
mmu-miR-7076-5p	0	0	0	0	0	0	0	1	0	0	0	0
mmu-miR-7077-3p	0	0	0	0	0	0	0	0	0	0	0	0
mmu-miR-7077-5p	0	0	0	1	0	0	1	0	0	1	0	2
mmu-miR-7078-3p	1	0	0	0	0	0	0	0	0	0	0	0
mmu-miR-7078-5p	0	0	2	0	0	0	1	1	0	0	0	0
mmu-miR-7079-3p	0	2	1	2	1	0	1	0	3	1	1	1
mmu-miR-7079-5p	0	3	2	0	0	0	2	1	0	0	0	0
mmu-miR-708-3p	87	114	48	124	22	62	210	247	351	60	320	545
mmu-miR-708-5p	339	426	207	510	134	433	1242	1593	1946	452	286	762
mmu-miR-7080-3p	0	0	0	0	1	0	0	0	0	0	1	0
mmu-miR-7080-5p	1	0	0	0	0	0	1	0	0	0	0	0
mmu-miR-7081-3p	2	2	1	0	0	1	5	5	11	0	5	7
mmu-miR-7081-5p	0	0	0	1	0	1	1	0	1	0	4	0
mmu-miR-7082-3p	0	1	1	2	0	1	4	2	6	2	2	2
mmu-miR-7082-5p	0	1	0	0	0	1	1	1	0	0	0	0
mmu-miR-7083-3p	0	0	0	0	0	0	1	0	0	0	0	0
mmu-miR-7083-5p	1	0	1	0	0	0	0	1	3	0	1	0
mmu-miR-7084-3p	0	0	0	0	0	0	0	0	2	0	0	0
mmu-miR-7084-5p	1	0	1	1	0	0	5	1	6	0	1	2
mmu-miR-7085-3p	0	0	0	1	0	0	2	1	1	1	3	1
mmu-miR-7085-5p	0	1	0	0	0	1	0	0	0	0	0	1
mmu-miR-7086-3p	0	0	0	0	0	0	1	0	0	0	0	0
mmu-miR-7086-5p	16	16	14	8	3	6	16	11	34	4	23	32
mmu-miR-7087-3p	1	0	0	0	0	1	2	1	2	2	0	0
mmu-miR-7087-5p	1	1	0	0	0	0	1	1	0	1	0	1
mmu-miR-7088-3p	0	0	0	0	0	0	0	0	0	0	0	0
mmu-miR-7088-5p	3	3	4	1	0	2	5	5	5	4	5	0
mmu-miR-7089-3p	0	0	0	0	1	0	1	1	4	0	0	0
mmu-miR-7089-5p	2	1	1	1	1	0	3	6	7	0	2	3
mmu-miR-709	2	3	2	5	1	4	5	6	11	7	13	15
mmu-miR-7090-3p	0	0	0	0	0	0	0	0	0	0	0	0
mmu-miR-7090-5p	2	1	0	2	0	1	3	4	6	1	2	4
mmu-miR-7091-3p	0	0	2	0	0	0	2	0	1	0	1	0
mmu-miR-7091-5p	2	2	0	0	0	1	4	8	10	1	3	5
mmu-miR-7092-3p	1	1	0	0	0	2	1	1	4	0	0	0
mmu-miR-7092-5p	0	0	1	1	0	0	2	3	7	0	2	2
mmu-miR-7093-3p	2	1	0	2	0	0	1	1	0	0	3	3
mmu-miR-7093-5p	0	0	0	0	0	0	0	0	0	3	0	2
mmu-miR-7094-1-5p	1	0	1	0	0	0	0	0	0	0	1	0
mmu-miR-7094-3p	0	0	1	0	0	0	0	0	0	0	0	0
mmu-miR-7094b-2-5p	0	0	1	0	0	0	0	1	0	0	0	0
mmu-miR-710	0	0	0	0	0	0	0	1	1	0	1	0
mmu-miR-711	0	0	0	0	0	0	0	0	0	0	0	0
mmu-miR-7115-3p	0	0	1	0	0	0	0	0	0	0	0	0
mmu-miR-7115-5p	0	2	1	0	0	1	7	0	3	1	4	0
mmu-miR-7116-3p	1	1	2	3	0	0	0	1	7	2	1	3
mmu-miR-7116-5p	3	3	2	1	1	1	2	0	2	1	1	4
mmu-miR-7117-3p	0	0	0	0	0	0	0	0	2	0	0	0
mmu-miR-7117-5p	2	2	2	2	0	2	5	4	9	2	6	5
mmu-miR-7118-3p	2	2	0	1	0	2	4	2	6	0	2	1
mmu-miR-7118-5p	0	0	0	0	0	0	0	0	2	0	0	0
mmu-miR-7119-3p	0	0	0	0	0	0	0	0	0	0	0	0
mmu-miR-7119-5p	1	0	0	0	0	0	1	1	1	0	0	2
mmu-miR-712-3p	3	2	1	0	1	3	7	7	22	6	12	18
mmu-miR-712-5p	10	20	3	8	2	4	20	22	41	2	14	37
mmu-miR-713	0	0	0	0	0	0	0	0	0	0	0	0
mmu-miR-714	9	2	0	5	0	1	9	1	8	4	8	13
mmu-miR-717	0	0	1	0	0	0	0	0	1	0	0	0
mmu-miR-718	0	0	0	0	0	0	2	3	1	0	4	1
mmu-miR-719	0	0	0	0	0	0	0	0	0	0	0	0
mmu-miR-721	3	1	2	1	2	1	1	0	4	0	5	0
mmu-miR-7210-3p	0	0	0	0	0	0	0	0	0	0	0	0
mmu-miR-7210-5p	0	0	2	0	0	0	0	0	0	0	0	0
mmu-miR-7211-3p	0	0	0	1	0	0	0	0	0	0	0	0
mmu-miR-7211-5p	0	0	0	0	0	0	0	0	0	0	0	0
mmu-miR-7212-3p	0	0	0	0	0	0	0	0	0	2	0	1
mmu-miR-7212-5p	1	1	0	0	0	1	2	3	3	0	0	3
mmu-miR-7213-3p	0	0	0	0	0	0	1	5	1	2	1	1
mmu-miR-7213-5p	3	1	11	1	1	0	4	1	4	3	5	3
mmu-miR-7214-3p	0	0	0	0	0	0	0	0	0	0	0	0
mmu-miR-7214-5p	1	0	0	0	1	0	0	3	2	0	0	0
mmu-miR-7215-3p	0	0	0	0	0	0	0	0	0	0	0	0
mmu-miR-7215-5p	0	0	0	0	0	0	0	0	0	0	0	0
mmu-miR-7216-3p	0	0	0	0	0	0	0	0	1	0	1	0
mmu-miR-7216-5p	0	0	0	0	0	0	0	0	0	0	0	0
mmu-miR-7217-3p	0	0	0	0	0	0	0	0	0	0	0	0
mmu-miR-7217-5p	0	0	0	0	0	0	0	0	0	0	1	0
mmu-miR-7218-3p	0	0	0	1	0	0	0	0	0	0	0	0
mmu-miR-7218-5p	0	0	0	0	0	0	0	0	0	0	0	0
mmu-miR-7219-3p	0	0	0	0	0	0	0	0	1	0	0	0
mmu-miR-7219-5p	0	0	2	0	0	0	0	0	0	1	0	0
mmu-miR-7220-3p	0	0	0	0	0	0	0	0	0	0	0	0
mmu-miR-7220-5p	1	0	0	0	0	0	0	0	0	5	0	0
mmu-miR-7221-3p	0	1	1	1	0	2	0	0	0	0	2	0
mmu-miR-7221-5p	0	0	0	0	0	0	0	0	0	0	0	0
mmu-miR-7222-3p	0	0	0	0	0	0	0	0	0	0	0	0
mmu-miR-7222-5p	0	0	0	0	0	0	0	0	0	0	0	0
mmu-miR-7223-3p	0	0	0	0	0	0	0	0	0	0	0	0
mmu-miR-7223-5p	0	0	0	0	0	1	0	0	0	0	1	1
mmu-miR-7224-3p	45	68	11	10	3	19	128	122	221	22	79	156
mmu-miR-7224-5p	2	0	0	1	0	0	2	2	2	3	2	4
mmu-miR-7225-3p	0	0	0	0	0	0	0	0	0	0	0	0
mmu-miR-7225-5p	0	0	0	0	0	0	0	0	0	0	0	0
mmu-miR-7226-3p	4	1	5	2	0	0	9	6	6	2	6	5
mmu-miR-7226-5p	1	0	2	0	1	1	1	3	1	0	2	2
mmu-miR-7227-3p	0	0	1	0	0	0	0	0	0	0	0	0
mmu-miR-7227-5p	0	0	0	0	0	0	0	0	0	0	0	0
mmu-miR-7228-3p	0	0	0	0	0	0	0	0	0	0	1	0
mmu-miR-7228-5p	0	0	0	0	0	0	0	0	0	0	0	0
mmu-miR-7229-3p	0	0	0	0	0	0	0	0	0	0	0	0
mmu-miR-7229-5p	0	0	0	1	0	0	0	0	0	0	1	0
mmu-miR-7230-3p	0	0	0	0	0	0	0	0	0	0	0	1
mmu-miR-7230-5p	0	0	1	1	0	0	1	0	3	0	1	3
mmu-miR-7231-3p	0	0	0	0	0	0	1	3	4	0	0	0
mmu-miR-7231-5p	0	0	1	1	0	0	3	2	0	1	4	1
mmu-miR-7232-3p	0	0	0	0	0	0	0	0	0	0	0	0
mmu-miR-7232-5p	0	0	1	0	0	0	0	0	0	0	1	1
mmu-miR-7233-3p	0	0	0	0	0	0	0	0	0	0	0	0
mmu-miR-7233-5p	0	0	0	0	0	0	0	0	0	0	0	0
mmu-miR-7234-3p	0	0	0	0	0	0	0	0	0	0	0	0
mmu-miR-7234-5p	0	0	0	0	0	0	0	0	0	0	0	0
mmu-miR-7235-3p	0	0	1	0	0	0	0	0	0	1	0	0
mmu-miR-7235-5p	5	3	2	3	1	4	8	14	18	4	12	13
mmu-miR-7236-3p	1	0	0	0	0	0	0	0	0	0	0	0
mmu-miR-7236-5p	0	0	0	0	0	0	1	0	0	0	0	0
mmu-miR-7237-3p	0	4	0	1	0	0	1	2	3	0	2	2
mmu-miR-7237-5p	0	0	0	0	0	0	1	1	3	0	1	0
mmu-miR-7238-3p	0	0	0	0	0	0	0	0	0	0	0	0
mmu-miR-7238-5p	0	0	0	1	0	1	1	1	1	0	0	0
mmu-miR-7239-3p	0	0	0	0	0	0	0	1	1	0	1	0
mmu-miR-7239-5p	0	0	1	0	0	0	0	0	0	0	0	0
mmu-miR-7240-3p	0	0	0	0	0	0	1	0	0	0	0	0
mmu-miR-7240-5p	0	0	0	0	0	0	1	0	2	0	2	0
mmu-miR-7241-3p	0	0	0	0	0	0	0	0	0	0	1	0
mmu-miR-7241-5p	0	0	0	0	0	0	0	0	0	0	0	0
mmu-miR-7242-3p	0	0	0	0	0	0	0	0	0	0	0	0
mmu-miR-7242-5p	0	0	0	0	0	0	0	0	0	0	0	0
mmu-miR-7243-3p	0	0	0	0	0	0	0	0	0	0	0	0
mmu-miR-7243-5p	0	0	0	0	0	0	0	0	0	0	0	0
mmu-miR-741-3p	0	0	1	1	0	0	3	4	5	0	3	2
mmu-miR-741-5p	0	0	1	0	0	0	0	0	0	0	0	0
mmu-miR-742-3p	0	1	0	0	0	0	0	0	0	0	2	0
mmu-miR-742-5p	0	0	0	0	0	0	0	0	0	1	0	1
mmu-miR-743a-3p	0	0	0	0	0	0	1	2	3	0	3	3
mmu-miR-743a-5p	0	0	0	0	0	0	1	0	2	0	0	2
mmu-miR-743b-3p	0	0	0	0	0	0	1	0	3	0	0	1
mmu-miR-743b-5p	8	6	9	7	3	4	18	14	27	6	20	18
mmu-miR-744-3p	117	178	49	74	4	38	220	173	344	83	350	345
mmu-miR-744-5p	6471	7465	3368	5722	770	3610	18332	17927	24732	3927	8241	19708
mmu-miR-7578	0	0	0	0	0	0	0	0	0	0	0	0
mmu-miR-758-3p	55	51	24	52	1	22	219	124	265	26	126	129
mmu-miR-758-5p	4	3	2	1	1	3	3	3	4	1	5	6
mmu-miR-759	0	0	0	0	0	0	0	0	0	0	0	0
mmu-miR-760-3p	771	1372	456	645	233	571	2324	2026	2137	696	1955	3212
mmu-miR-760-5p	1	1	0	1	1	0	4	1	6	3	4	2
mmu-miR-761	0	0	0	0	0	0	0	0	0	0	0	0
mmu-miR-762	1	2	0	0	0	0	0	1	4	0	1	5
mmu-miR-763	0	0	0	0	0	0	0	0	0	0	0	0
mmu-miR-764-3p	0	1	0	0	0	0	0	0	0	0	0	0
mmu-miR-764-5p	0	0	2	0	0	0	0	0	0	0	0	0
mmu-miR-7646-3p	0	0	0	0	0	0	0	0	0	0	0	0
mmu-miR-7646-5p	0	0	0	0	0	0	1	2	1	0	1	0
mmu-miR-7647-3p	0	0	0	3	0	3	2	6	13	2	2	5
mmu-miR-7647-5p	1	0	1	0	1	1	0	0	1	3	4	0
mmu-miR-7648-3p	2	3	2	4	0	2	8	11	6	0	9	13
mmu-miR-7648-5p	2	0	0	0	0	3	3	7	2	10	3	5
mmu-miR-7649-3p	0	0	0	0	0	0	0	0	0	0	0	0
mmu-miR-7649-5p	23	5	0	0	0	1	0	1	10	1	0	1
mmu-miR-7650-3p	1	0	0	0	0	0	0	0	0	0	0	0
mmu-miR-7650-5p	3	2	2	1	0	0	4	1	4	1	2	4
mmu-miR-7651-3p	0	0	0	0	1	0	2	1	0	0	2	2
mmu-miR-7651-5p	3	2	0	0	0	1	1	3	1	1	1	7
mmu-miR-7652-3p	1	0	2	1	0	0	15	4	6	2	6	22
mmu-miR-7652-5p	1	0	1	0	0	2	3	2	1	2	4	5
mmu-miR-7653-3p	0	2	0	0	0	0	1	1	8	0	0	4
mmu-miR-7653-5p	0	2	0	1	0	0	0	2	2	0	1	2
mmu-miR-7654-3p	0	0	1	0	0	0	0	3	2	0	0	2
mmu-miR-7654-5p	26	40	20	3	0	11	25	16	40	3	15	7
mmu-miR-7655-3p	0	0	0	1	0	0	2	5	2	1	6	2
mmu-miR-7655-5p	3	5	1	2	0	1	9	10	10	5	9	7
mmu-miR-7656-3p	0	0	0	0	0	0	0	1	0	0	0	0
mmu-miR-7656-5p	1	1	0	0	0	0	1	2	1	0	1	1
mmu-miR-7657-3p	0	0	0	0	0	0	0	0	0	0	0	1
mmu-miR-7657-5p	0	0	0	0	0	0	0	0	1	0	0	2
mmu-miR-7658-3p	0	0	1	0	0	0	1	0	1	0	1	5
mmu-miR-7658-5p	3	5	2	4	3	4	15	9	28	1	7	13
mmu-miR-7659-3p	0	0	1	0	0	0	0	0	0	0	0	0
mmu-miR-7659-5p	0	0	0	0	0	0	0	0	5	0	2	0
mmu-miR-7660-3p	0	0	0	0	0	0	0	1	1	0	0	0
mmu-miR-7660-5p	0	0	4	2	0	0	0	0	0	0	2	0
mmu-miR-7661-3p	3	0	0	5	0	1	8	1	5	2	6	6
mmu-miR-7661-5p	0	1	0	1	0	0	1	0	2	1	2	0
mmu-miR-7662-3p	0	6	0	2	0	0	5	2	1	2	4	3
mmu-miR-7662-5p	0	1	3	0	0	0	1	1	2	2	1	0
mmu-miR-7663-3p	0	1	0	0	0	0	6	1	4	0	2	1
mmu-miR-7663-5p	0	0	0	1	0	1	0	0	1	0	0	0
mmu-miR-7664-3p	1	0	1	1	0	0	2	2	3	1	3	3
mmu-miR-7664-5p	0	0	0	0	0	0	2	0	1	0	3	1
mmu-miR-7665-3p	0	0	0	0	0	0	2	0	0	0	0	2
mmu-miR-7665-5p	0	0	0	0	0	0	0	0	0	0	1	3
mmu-miR-7666-3p	1	0	1	0	0	0	0	2	4	3	0	2
mmu-miR-7666-5p	0	0	1	0	0	0	1	0	5	1	0	0
mmu-miR-7667-3p	1	2	1	2	1	1	1	1	3	0	1	1
mmu-miR-7667-5p	8	4	4	11	1	4	24	20	36	6	23	25
mmu-miR-7668-3p	0	1	2	0	0	0	0	3	1	0	2	0
mmu-miR-7668-5p	0	1	3	2	0	0	2	2	1	3	2	8
mmu-miR-7669-3p	14	22	11	23	5	11	35	19	30	3	40	31
mmu-miR-7669-5p	9	8	1	4	1	3	7	7	15	10	25	9
mmu-miR-767	0	0	1	0	0	1	1	0	3	0	0	1
mmu-miR-7670-3p	0	0	0	0	0	0	0	0	0	0	0	0
mmu-miR-7670-5p	0	0	0	1	0	0	0	0	1	0	0	1
mmu-miR-7671-3p	0	0	0	1	0	0	0	0	0	0	0	1
mmu-miR-7671-5p	0	0	0	0	0	0	0	1	0	0	0	1
mmu-miR-7672-3p	0	0	0	0	1	2	0	4	1	0	2	0
mmu-miR-7672-5p	0	0	0	0	0	0	0	1	0	4	0	2
mmu-miR-7673-3p	0	0	0	0	0	0	0	1	0	0	0	0
mmu-miR-7673-5p	0	1	0	0	0	0	0	0	0	0	0	0
mmu-miR-7674-3p	1	0	0	0	0	0	0	0	0	0	0	0
mmu-miR-7674-5p	2	0	0	1	0	0	0	0	1	0	0	2
mmu-miR-7675-3p	1	0	0	1	0	1	0	1	3	0	2	3
mmu-miR-7675-5p	0	0	0	1	0	0	0	4	2	0	0	2
mmu-miR-7676-3p	0	0	0	0	0	0	0	0	0	0	0	0
mmu-miR-7676-5p	0	0	0	0	0	0	0	0	0	0	1	1
mmu-miR-7677-3p	0	0	0	0	0	0	3	2	4	0	5	5
mmu-miR-7677-5p	0	0	0	0	1	0	0	0	1	2	1	0
mmu-miR-7678-3p	0	0	0	0	0	0	1	0	0	0	0	0
mmu-miR-7678-5p	0	0	2	0	0	1	0	0	0	3	1	0
mmu-miR-7679-3p	6	7	0	10	1	4	11	15	11	4	13	23
mmu-miR-7679-5p	0	9	7	2	0	3	5	4	11	3	13	12
mmu-miR-7680-3p	11	18	3	7	3	2	38	42	49	6	16	28
mmu-miR-7680-5p	0	0	0	0	0	0	2	2	4	0	0	0
mmu-miR-7681-3p	0	0	0	0	0	0	0	0	0	0	0	0
mmu-miR-7681-5p	0	0	0	1	0	1	1	0	0	0	0	1
mmu-miR-7682-3p	1	0	0	0	0	0	1	0	1	0	0	2
mmu-miR-7682-5p	0	0	2	0	0	0	0	0	0	0	0	2
mmu-miR-7683-3p	0	0	0	0	0	0	1	0	0	0	0	0
mmu-miR-7683-5p	0	0	0	0	0	0	0	0	0	0	0	0
mmu-miR-7684-3p	0	0	0	0	0	0	0	0	0	0	1	0
mmu-miR-7684-5p	0	0	0	0	0	0	1	0	0	0	0	0
mmu-miR-7685-3p	0	0	0	0	0	0	0	0	1	0	0	0
mmu-miR-7685-5p	0	0	2	0	0	0	0	0	0	0	1	0
mmu-miR-7686-3p	0	0	0	0	0	0	0	0	0	0	0	1
mmu-miR-7686-5p	1	1	0	0	0	2	1	1	1	2	2	1
mmu-miR-7687-3p	0	4	0	0	0	1	3	4	5	0	4	7
mmu-miR-7687-5p	3	3	2	1	0	3	2	6	2	1	4	2
mmu-miR-7688-3p	0	0	2	0	0	0	0	0	2	1	0	0
mmu-miR-7688-5p	111	152	45	104	9	69	385	433	472	65	302	469
mmu-miR-7689-3p	17	14	11	4	4	2	42	48	66	6	27	36
mmu-miR-7689-5p	1	0	0	0	0	0	0	0	1	0	0	0
mmu-miR-770-3p	77	97	58	34	8	39	194	170	142	62	127	120
mmu-miR-770-5p	84	93	50	72	7	32	184	206	322	79	194	261
mmu-miR-7a-1-3p	519	548	266	245	62	261	1032	824	1476	294	1033	1824
mmu-miR-7a-2-3p	0	0	0	1	0	0	0	0	0	0	0	2
mmu-miR-7a-5p	23253	18069	10012	17650	3083	9554	13516	35732	36921	16055	36004	68262
mmu-miR-7b-3p	0	0	0	0	0	0	0	0	0	0	0	0
mmu-miR-7b-5p	16	12	7	9	2	7	19	14	52	15	42	52
mmu-miR-802-3p	0	0	0	0	0	0	0	0	0	0	0	0
mmu-miR-802-5p	0	0	0	0	0	0	0	0	0	2	2	1
mmu-miR-804	0	0	0	0	0	0	0	1	0	0	1	0
mmu-miR-8090	0	0	0	1	0	0	1	1	0	0	0	0
mmu-miR-8091	0	0	0	0	0	0	0	1	0	0	0	0
mmu-miR-8092	2	1	1	0	0	0	5	6	8	4	2	4
mmu-miR-8093	1	0	0	0	0	1	0	1	0	0	1	2
mmu-miR-8094	0	0	0	0	0	0	1	0	0	0	0	0
mmu-miR-8095	0	1	1	0	0	0	0	0	1	0	0	0
mmu-miR-8096	0	0	0	0	0	0	0	0	0	0	1	0
mmu-miR-8097	1	1	0	0	0	0	1	1	0	0	0	1
mmu-miR-8098	2	2	2	2	0	1	6	2	10	2	4	4
mmu-miR-8099	0	0	0	0	0	0	3	1	1	3	1	0
mmu-miR-8100	2	0	0	0	0	2	0	2	2	0	3	2
mmu-miR-8101	0	0	0	1	0	0	0	3	2	0	0	1
mmu-miR-8102	0	0	1	0	0	0	0	0	0	0	0	1
mmu-miR-8103	6	2	3	3	0	1	14	6	16	2	10	7
mmu-miR-8104	0	0	0	0	0	0	0	0	0	0	0	0
mmu-miR-8105	24	29	382	30	7	5	49	22	58	33	129	40
mmu-miR-8106	4	1	0	0	2	3	9	9	9	2	3	9
mmu-miR-8107	0	0	0	0	0	0	0	1	1	0	0	2
mmu-miR-8108	0	0	0	0	0	0	0	1	1	0	1	0
mmu-miR-8109	2	9	2	7	2	6	17	11	16	2	15	13
mmu-miR-8110	2	1	1	2	0	1	2	1	2	2	6	2
mmu-miR-8111	1	7	1	2	0	2	7	11	7	3	9	14
mmu-miR-8112	66	60	29	43	2	23	208	145	234	5	120	153
mmu-miR-8113	0	0	0	0	0	0	1	0	0	0	0	0
mmu-miR-8114	49	54	23	32	3	12	177	103	203	8	91	99
mmu-miR-8115	0	0	0	0	0	0	0	0	0	0	0	0
mmu-miR-8116	0	0	0	0	0	0	0	0	0	3	0	0
mmu-miR-8117	2	0	1	2	0	0	1	1	0	0	0	2
mmu-miR-8118	4	1	0	3	0	2	6	6	20	1	5	17
mmu-miR-8119	1	0	0	0	0	0	0	0	0	0	0	0
mmu-miR-8120	1	2	2	2	0	2	5	17	16	0	5	10
mmu-miR-871-3p	1	0	0	0	0	1	4	0	6	1	0	2
mmu-miR-871-5p	1	0	0	0	0	0	0	0	2	0	0	1
mmu-miR-872-3p	1048	1253	646	625	58	298	2696	2412	4481	493	2528	2580
mmu-miR-872-5p	3929	6288	2098	5884	662	2696	10121	11903	15915	3776	13828	19597
mmu-miR-873a-3p	15	11	1	9	3	3	33	22	24	4	18	34
mmu-miR-873a-5p	114	92	48	82	14	39	337	248	546	70	292	622
mmu-miR-873b	0	0	0	0	0	0	0	0	0	0	0	0
mmu-miR-874-3p	20	23	10	20	3	11	27	34	37	6	25	53
mmu-miR-874-5p	3	3	2	0	0	1	1	1	5	0	7	6
mmu-miR-875-3p	2	2	1	0	1	1	1	3	2	1	4	4
mmu-miR-875-5p	1	0	1	1	0	0	1	1	4	0	2	0
mmu-miR-876-3p	0	0	2	0	0	0	0	0	1	0	1	0
mmu-miR-876-5p	9	17	6	13	1	5	44	25	60	6	42	57
mmu-miR-877-3p	40	35	13	23	3	14	133	53	202	20	86	45
mmu-miR-877-5p	20	26	13	10	4	32	93	53	56	13	62	21
mmu-miR-878-3p	39	39	29	28	12	22	84	137	73	25	145	318
mmu-miR-878-5p	0	2	0	0	0	0	2	1	3	0	3	3
mmu-miR-879-3p	0	0	1	1	0	1	1	0	2	0	0	2
mmu-miR-879-5p	0	0	0	0	1	0	0	0	1	1	0	0
mmu-miR-880-3p	1	1	1	0	0	0	2	1	4	0	2	3
mmu-miR-880-5p	0	0	0	0	0	0	0	0	0	0	0	0
mmu-miR-881-3p	4	0	0	2	0	4	4	6	14	1	7	6
mmu-miR-881-5p	0	0	4	0	0	0	1	0	0	1	0	0
mmu-miR-882	0	0	0	0	0	0	0	0	0	0	0	0
mmu-miR-883a-3p	0	0	0	0	0	0	1	0	2	0	1	0
mmu-miR-883a-5p	0	0	0	0	0	0	0	2	1	0	0	1
mmu-miR-883b-3p	0	0	0	0	0	0	0	0	0	0	0	1
mmu-miR-883b-5p	0	0	0	0	0	0	0	1	0	0	0	0
mmu-miR-9-3p	50	54	32	51	8	16	76	96	135	33	53	164
mmu-miR-9-5p	682	900	348	550	115	464	865	1300	1571	313	1063	1573
mmu-miR-92a-1-5p	837	912	346	783	77	460	1677	1398	2535	325	2045	3600
mmu-miR-92a-2-5p	0	0	0	0	0	0	0	0	0	0	0	0
mmu-miR-92a-3p	90139	66349	34254	37226	6893	52075	215687	146942	226434	43731	103771	145284
mmu-miR-92b-3p	350	257	160	134	29	98	418	381	573	151	564	776
mmu-miR-92b-5p	4	9	9	9	1	6	2	3	6	6	35	3
mmu-miR-93-3p	368	462	337	214	37	175	1378	1198	1964	265	791	1128
mmu-miR-93-5p	65090	45212	31255	46507	10413	50355	139262	214816	263589	14850	99181	182252
mmu-miR-935	63	73	50	34	5	19	126	125	186	12	122	155
mmu-miR-96-3p	36	49	31	36	3	23	270	184	442	33	136	135
mmu-miR-96-5p	7386	3808	2962	5067	923	3504	9904	9374	16510	5615	8763	14272
mmu-miR-9768-3p	0	0	0	0	0	1	0	1	1	2	0	1
mmu-miR-9768-5p	0	0	0	0	0	0	0	0	0	0	0	0
mmu-miR-9769-3p	7	5	0	4	0	0	8	5	12	2	10	8
mmu-miR-9769-5p	0	0	1	1	0	0	1	0	0	0	0	0
mmu-miR-98-3p	149	126	39	119	16	52	306	154	356	50	321	267
mmu-miR-98-5p	5699	5611	3049	4006	838	3282	15953	13886	25262	3872	11605	12097
mmu-miR-99a-3p	16	20	11	22	4	9	14	16	33	6	36	69
mmu-miR-99a-5p	8548	7666	3236	6563	391	2851	12868	14420	17562	2732	11926	18359
mmu-miR-99b-3p	1994	3058	1163	2518	333	1507	7067	7199	11963	748	4338	8194
mmu-miR-99b-5p	82710	119317	38857	53952	9189	57399	234086	239109	327877	27833	170045	264038
