# Supplementary material for: Inducible and reversible inhibition of miRNA-mediated gene repression in vivo
Source: eLife. 2021 Aug 31;10:e70948. doi: 10.7554/eLife.70948 (PMC8476124; doi:10.7554/eLife.70948)
Supplement: Figure 2—source data 1. [file elife-70948-fig2-data1.csv]

baseMean	log2FoldChange	lfcSE	stat	pvalue	padj	Symbol	Tissue
73.0239168567191	-0.0595078810970885	0.393741281226166	-0.151134473153977	0.879869639181707	0.951360035893936	Sox17	liver
2287.19743504075	-0.284680525196107	0.153317672397048	-1.85680176815408	0.0633393620789337	0.248766740388368	Mrpl15	liver
7300.8851576732	-0.0634833210527577	0.197968747103685	-0.320673449630453	0.748457869661538	0.893356338999933	Lypla1	liver
593.346159342483	-0.086008246467951	0.158393068536331	-0.543005115455686	0.587126280362005	0.800536002805726	Tcea1	liver
2718.51965272496	-0.117460340162035	0.232496809568066	-0.505212696811854	0.613409453472206	0.815864785068496	Atp6v1h	liver
2851.93432812982	0.170209445145201	0.120093595647062	1.41730659514453	0.156393307783407	0.416686510698971	Rb1cc1	liver
6369.46268124128	-0.00957738337076212	0.142596347869451	-0.067164296378266	0.946450908279243	0.980098513092821	Pcmtd1	liver
41.9842598349176	-2.80015647914629	0.572342258476456	-4.89245104249363	9.95878934630246e-07	7.13120451404873e-05	Sntg1	liver
480.16030910728	0.0395777354590964	0.1752767087176	0.225801452735302	0.821355847137254	0.928320471196248	Rrs1	liver
6064.26180827567	0.0879539175649948	0.158818025976382	0.553803115384864	0.579713595979286	0.797114477040897	Adhfe1	liver
36.7674590298844	-0.274343072907103	0.451069584498827	-0.608205656809956	0.543051083281439	0.772694120717716	2610203C22Rik	liver
2507.90142733658	0.210708962741979	0.125580776827497	1.67787593025816	0.0933713223047236	0.312752543257614	Vcpip1	liver
36.4394749287667	-0.483666563073019	0.482266820368807	-1.00290242381415	0.31590794305058	0.594923693628441	1700034P13Rik	liver
990.607297342152	0.367833218937826	0.178966436322358	2.05531956995152	0.0398481483184436	0.187915807240641	Sgk3	liver
425.393133034378	-0.516400986920003	0.256730241086412	-2.01145367501209	0.0442775587492144	0.200700464111925	Snhg6	liver
379.014746013059	1.69829668112921	1.1699702219586	1.451572569331	0.146620490526641	0.402102693732109	Tcf24	liver
3513.93086768028	-0.0682635031911889	0.144139220919526	-0.473594228938567	0.635789291623288	0.829446329270844	Cops5	liver
790.869276795832	0.398434409487949	0.146285728219403	2.72367246167971	0.00645604984175301	0.0580031961137331	Cspp1	liver
6220.26499561753	0.223749349247356	0.118416245047149	1.8895156585844	0.0588227666132865	0.237861473061457	Arfgef1	liver
411.498442800699	-0.676869295324575	0.275447118246453	-2.45734752875125	0.0139967211315329	0.0963734654583289	Prex2	liver
49.6415745727949	0.094257651366478	0.492877762105927	0.191239407847783	0.848338030333526	0.939745558509379	Sulf1	liver
3225.22203881874	0.185522150453682	0.138684177494494	1.33773119475758	0.180984078197657	0.447818612548224	Ncoa2	liver
6786.48299440574	-0.046720965363348	0.173146976228973	-0.269834139647713	0.787287857029531	0.913931575804811	Tram1	liver
12773.0296759603	-0.309180890065499	0.211350311867469	-1.4628835289317	0.143499251725308	0.39758083792157	Lactb2	liver
1049.73345554124	-0.230390576916646	0.216327945642463	-1.06500607784361	0.286873179363075	0.565476652257406	Xkr9	liver
529.557377668246	0.136411054750491	0.171798934523356	0.794015720347473	0.427186279642879	0.691518624569411	Terf1	liver
7984.84856858347	-0.176275032658291	0.141572535473738	-1.24512167609649	0.213087027456196	0.487223572189928	Rpl7	liver
978.482000023714	0.0556027894636224	0.136439209474355	0.407527936271673	0.683620280284683	0.855770236402158	Rdh10	liver
235.637257690452	-0.0262847721927199	0.197055312198345	-0.13338778792354	0.893886702929611	0.956287864494729	Stau2	liver
1088.25864190072	0.0104617919011343	0.154271873468202	0.0678139939960647	0.945933703809657	0.980098513092821	Ube2w	liver
1317.02181240737	-0.0630554818567982	0.163791888631	-0.384973165544561	0.700257296998229	0.865518882450293	Tceb1	liver
1728.28555303194	-0.0873328385655305	0.140068721012569	-0.62349993584716	0.53295604439858	0.766780745637602	Tmem70	liver
134.348467018722	-0.463403942473104	0.285732859978341	-1.621808365017	0.104844386791792	0.333054653579419	Ly96	liver
51.4293772981779	0.485399571070309	0.45390512352078	1.06938552996546	0.284895984811826	0.563793172772868	Jph1	liver
420.309408514935	-0.202130301427198	0.194122979296504	-1.04124870821431	0.297760134996435	0.576575441224268	Pkhd1	liver
267.856616533005	-0.351119014108048	0.219855880320045	-1.59704172386439	0.110256406947953	0.342292793699063	Mcm3	liver
175.974810421307	0.402351522703666	0.274708813206425	1.46464730420326	0.143017168854955	0.397180514079793	Tram2	liver
142.98595909013	-1.07962596478476	0.254107250608449	-4.2487019248748	2.15012786193077e-05	0.000808313693094599	Tmem14a	liver
66853.0606552452	-0.775694928741713	0.211656161711149	-3.66488233779992	0.000247452319538341	0.00548223094667816	Gsta3	liver
1015.10696814501	-0.757336772179497	0.529181497868032	-1.43114748952988	0.152387949268063	0.41140642497639	Gm4956	liver
618.051210785055	-0.489628392713354	0.187321340632758	-2.6138420270719	0.0089530421831175	0.0723824579723814	Ogfrl1	liver
742.841624423458	0.849914094376976	0.138973189092466	6.11566950378815	9.6152416837487e-10	1.92785595759162e-07	Smap1	liver
813.055766562428	-0.0887692609700695	0.160649378996557	-0.552565229473885	0.58056115674091	0.797485108208271	Sdhaf4	liver
2293.81113941294	0.349135440886041	0.117647642081183	2.96763653490921	0.00300098965749157	0.0340263012060542	Fam135a	liver
4635.55788737799	0.122341109941076	0.132652050281376	0.92227078044833	0.356387351259141	0.631877665452259	Lmbrd1	liver
3066.90807897198	0.106200351996615	0.121065612778616	0.877213186793312	0.380370854881751	0.651840240475936	Phf3	liver
494.715934460774	0.265251974237218	0.19089017629431	1.38955277524737	0.164664724554955	0.427018818126605	Ptp4a1	liver
165.416157777536	-0.303730705084546	0.23598474686539	-1.28707769938114	0.19806720743539	0.469948064250389	Prim2	liver
506.645809477057	-0.35704861099785	0.223934261915786	-1.5944349379289	0.110838652327942	0.343568406984061	Rab23	liver
111.644866275841	0.240683206113964	0.336092859224726	0.716121153746479	0.473916542947986	0.726639817953641	Bag2	liver
541.925387074229	0.0504518808336175	0.16513377381208	0.30552127326195	0.759969170292397	0.898863360368648	Zfp451	liver
4421.02604636871	0.381459072144715	0.152185674104643	2.50653732283909	0.0121920185344555	0.0879316444661266	Dst	liver
326.34978628609	-0.254202191290134	0.193408787094398	-1.31432596785825	0.188736532101478	0.458131654798383	Ccdc115	liver
1406.36142253842	-0.0559151726528089	0.141894824742452	-0.394060690756682	0.693536231978599	0.861638012052313	Imp4	liver
47.9836584927654	-0.572904549505277	0.42492922438498	-1.34823522748869	0.177582737617851	0.442869139695704	Ptpn18	liver
3937.04142826052	0.191410263384289	0.14583421909863	1.31251954834301	0.189344894693044	0.458960121530793	Fam168b	liver
960.633084170389	-0.271575802434432	0.260097251677545	-1.04413176487969	0.296424431273394	0.575421151590678	Plekhb2	liver
5478.43298720767	0.503090947231205	0.154680358110855	3.25245527858587	0.00114412598638519	0.0174236780203845	Hs6st1	liver
6370.80102572524	0.377449870168672	0.139983106367992	2.69639587205916	0.00700943088143774	0.0613444687387792	Uggt1	liver
336.034053525001	-0.302374662441391	0.197189822466939	-1.5334192133171	0.125172597736288	0.367992754342019	Neurl3	liver
67.1884592509286	-0.043256278802179	0.514683997021201	-0.0840443438158757	0.93302117519455	0.97491919895687	Arid5a	liver
2999.43657612755	-0.02184530830664	0.163648387221376	-0.133489297863282	0.893806427591912	0.956287026318988	Kansl3	liver
236.59413844074	0.683810701563024	0.24224509262337	2.8228051770121	0.00476054905180061	0.046980644046892	Fer1l5	liver
813.081744435738	0.521505021626381	0.194746892878664	2.67786054975112	0.00740940593778561	0.0637590510955371	Lman2l	liver
221.199514057764	0.711149164732237	0.223482722572953	3.18212144788996	0.00146200498300648	0.0209421717064503	Cnnm4	liver
1039.62069134381	0.10187449171562	0.164088203946204	0.620852012915075	0.53469699716488	0.767817483601081	Cnnm3	liver
115.89573821918	0.305686506777755	0.326875849477175	0.935176175501151	0.349697514392729	0.625741647797788	Ankrd23	liver
170.971387200796	-0.138941693101054	0.32125219061284	-0.432500375595886	0.665377779287755	0.845314984900677	Ankrd39	liver
183.646498024101	-0.520800144211086	0.344303390986242	-1.51261985169323	0.13037624865891	0.377388419481878	Sema4c	liver
2980.35599255577	0.00345752062989303	0.12441558667841	0.0277900922400507	0.977829568159376	0.992245730374269	Cox5b	liver
2806.55970976587	0.182338373686154	0.129684852876961	1.40601133934391	0.159720757640337	0.420354564518322	Actr1b	liver
330.580857309331	-0.788039168401375	0.35835591330368	-2.19904050455439	0.0278750423375206	0.150848744633546	Zap70	liver
2459.4251382157	0.675943402057275	0.147222484844531	4.59130548415263	4.40482053009921e-06	0.000245324032301359	Tmem131	liver
1164.40642725677	-0.0229912425305811	0.183773574933399	-0.125106357314501	0.900439350432915	0.959798457000529	Inpp4a	liver
5008.96245145855	-0.172598179170346	0.120244477091064	-1.43539381887481	0.151174906385854	0.409049403463195	Coa5	liver
1354.95554190098	-0.204804461897876	0.135283571310334	-1.51389011920792	0.130053710578729	0.377214377833931	Unc50	liver
86.63880494457	-0.398210966322154	0.310139324899494	-1.28397444100712	0.199150898556198	0.471240226127274	Mgat4a	liver
52.2088504656335	-0.537964014416646	0.36978956025778	-1.45478421305791	0.145729010033293	0.401171622585931	Tsga10	liver
356.347933745865	-0.0560813925286508	0.204050446357919	-0.274840822598742	0.783438533451856	0.912368398589141	Lipt1	liver
373.006389784294	-0.164355453982782	0.184901504463772	-0.88888110704899	0.374066980133193	0.647392572435954	Mitd1	liver
2208.76580634051	-0.240253680904105	0.155345734391609	-1.54657404559595	0.121965992263941	0.361837456704121	Mrpl30	liver
1410.79312995872	-0.0108300467815987	0.163411257481804	-0.0662747900511358	0.947159053711947	0.980325511155014	Txndc9	liver
3423.6029555729	0.0742104215246833	0.122071396866507	0.607926372840947	0.5432363072216	0.772694120717716	Eif5b	liver
460.081581526434	0.159802107790634	0.205278580885175	0.778464597239303	0.436295169716603	0.699164898320331	Rev1	liver
690.266223568632	-0.403408452704952	0.179828688310541	-2.24329308351689	0.024877921096479	0.139720537250533	Pdcl3	liver
209.036715656468	-0.157710033045459	1.10767404669813	-0.142379460379683	0.886780285336857	0.953603900295199	Npas2	liver
2760.08683617309	-0.235637592095434	0.150993305442604	-1.56058304310058	0.118622162246492	0.356524844798993	Rpl31	liver
744.582038208697	0.39289868778627	0.185340612833084	2.11987368435062	0.0340166992000396	0.171523656884981	Tbc1d8	liver
838.558472113679	0.417004186527853	0.144087255743439	2.89410874248564	0.00380236454179584	0.0404442488397913	Cnot11	liver
4189.24451337747	-0.00792707657025357	0.12447295883869	-0.063685130041189	0.949220945217949	0.981251451754886	Rnf149	liver
623.667810693248	0.140681999953394	0.278223337439488	0.505644139158497	0.613106489592705	0.815742138856178	Map4k4	liver
1990.75162496266	0.313774831327704	0.252548886726618	1.24243205105617	0.214077196264181	0.488495574935147	Il1r1	liver
165.608239788274	-0.189705667869454	0.231050117610187	-0.821058521119269	0.411612935084579	0.679432438126714	Mfsd9	liver
994.076361624798	-0.263561253306869	0.140001454896166	-1.88256081697395	0.0597599106714465	0.239948134471519	Mrps9	liver
2159.25984250313	0.127523851281668	0.143580653751357	0.888168760552553	0.374449980064278	0.647775849895494	Tgfbrap1	liver
683.249580134323	-0.315168207062431	0.18038926685388	-1.74715609503377	0.0806102652212533	0.286312774589554	AI597479	liver
81.5032130297342	0.249579410013806	0.41046980067828	0.608033549852849	0.543165222628867	0.772694120717716	Nck2	liver
283.292123717283	-0.123138280664992	0.227264831811917	-0.541827258019845	0.587937511714342	0.801094787058665	Uxs1	liver
3087.9960585042	0.248122211611914	0.122084467933217	2.03238147990818	0.0421150515084494	0.194669927669523	Tpp2	liver
245.55607038939	-0.439439197755994	0.208571967276514	-2.10689482145704	0.0351266976063894	0.175487613041887	Tex30	liver
411.630493803311	0.150504926029488	0.161413098826603	0.93242077082708	0.351119114582818	0.627445476594073	Kdelc1	liver
919.425188730471	0.0494397455924551	0.169616808723496	0.291479046000978	0.770684967354088	0.90487411255804	Bivm	liver
1086.27994427308	0.028192379245037	0.15757893164232	0.178909572182082	0.858008706543138	0.943127433426538	Ercc5	liver
801.86427952348	0.561518326166389	0.184874304867024	3.03729783633414	0.00238709466528012	0.0289191831050552	Col3a1	liver
200.166785216576	-0.35745492580866	0.337307055098368	-1.05973154253894	0.289266748545216	0.56795805206446	Col5a2	liver
668.862389608093	0.381166868177288	0.204236628264922	1.86630023916603	0.0619993713636328	0.245669445818348	Wdr75	liver
11852.7645489342	0.634557578927317	0.173806583454232	3.65094098460553	0.000261281277501897	0.00572333678178691	Slc40a1	liver
191.67493391839	-0.0428473011165947	0.281785232362915	-0.152056588478033	0.879142303354642	0.951237427411806	Slc39a10	liver
615.930472927141	-0.206895761010477	0.290092868581638	-0.713205264307464	0.475718749219974	0.728176380819592	Sdpr	liver
864.201067601396	0.701202818275121	0.193818289191564	3.61783617634802	0.000297076330151288	0.00630304806299823	Nabp1	liver
13589.8875794149	0.109731365476498	0.133946100709037	0.819220305000599	0.41266073209361	0.680334464198087	Myo1b	liver
3000.25017777521	-0.744100414809979	0.255410075547217	-2.91335576020539	0.00357566982263732	0.0387525296993936	Stat1	liver
311.317325095549	0.101994874272041	0.237210469946378	0.429976275056903	0.667212899447891	0.846427548411492	Gls	liver
3822.70619368473	0.162898961691832	0.158732365110663	1.02624919359239	0.304774138744012	0.583641020230891	Nab1	liver
43.1898258363967	0.170719702835878	0.495025749352568	0.344870348783186	0.730191842853396	0.882761857005421	Tmem194b	liver
881.801047653404	0.597175536495648	0.184786384606209	3.23170745381629	0.00123052965442904	0.0184579448164356	Mfsd6	liver
377.776693797775	0.0957051911113891	0.193779972703251	0.493885873634369	0.621386781620408	0.820696309916806	Inpp1	liver
4384.7633853754	-0.132575294295932	0.133438849350468	-0.99352845847563	0.320452488914447	0.598516292755908	Hibch	liver
422.734117589082	0.0296290883960844	0.188533554017432	0.157155518286919	0.875122283866567	0.949767003407282	Pms1	liver
1391.10119390123	-0.373999877221876	0.144760069082144	-2.58358454505606	0.00977794987871023	0.0763822967797948	Ormdl1	liver
1111.93053111741	-0.134652757674353	0.159325310624649	-0.845143544025962	0.398030698868479	0.667453207051548	Osgepl1	liver
2140.69299450661	-0.336913336984927	0.158051765096236	-2.13166450105625	0.0330344371017975	0.168677537493474	Asnsd1	liver
422.355993564518	0.0727692770872035	0.222195432652488	0.327501228168871	0.74328881419175	0.88946229331809	Stk17b	liver
199.324744780393	-0.403785074902668	0.357226246526724	-1.130334287664	0.258335391921879	0.535951281888238	Hecw2	liver
719.792984232949	0.159798047930782	0.151343671454259	1.05586210771342	0.29103121811183	0.570212630925947	Gtf3c3	liver
1929.88911390588	0.447028091245201	0.180255189912808	2.4799734834899	0.0131392153470253	0.0923275470938753	Pgap1	liver
259.908186684197	-0.406850814768269	0.208251509828592	-1.95365121291625	0.0507424796462904	0.218245273559125	Ankrd44	liver
7766.1463731069	0.160548596139932	0.118706658394897	1.35248180945201	0.176221234099455	0.441422160846987	Sf3b1	liver
683.454533123323	0.573486901144981	0.321131768014693	1.78583048538113	0.0741267090978363	0.272955099616459	Coq10b	liver
12916.5749280105	-0.138018504415972	0.108444568083927	-1.27271016754991	0.203120908314742	0.47623163652823	Hspd1	liver
3049.67729269145	-0.181508209238174	0.160434815343224	-1.13135175086446	0.257907070695793	0.535895329107715	Hspe1	liver
1336.5741222975	0.165509937838228	0.145792238786942	1.13524519010989	0.256272600018477	0.534957379528418	Mob4	liver
110.47636848632	0.298558732754297	0.31170279226694	0.95783143481953	0.338147765243095	0.613562234671861	Mars2	liver
1772.61881966049	-0.049535835381035	0.211548312469156	-0.234158499318009	0.814861932156195	0.925988083734539	1700066M21Rik	liver
408.486251227642	-0.815308331944322	0.246664528227893	-3.30533270349704	0.000948637181409656	0.0152772493873603	Tyw5	liver
686.944922932452	0.156872572085184	0.162671663827225	0.96435094099609	0.334870009348502	0.611117447278896	9430016H08Rik	liver
48.2970272296575	0.31576821790208	0.458520268348168	0.68866796017468	0.491032243152531	0.738974416035778	Spats2l	liver
241.531522461471	0.00254854969717005	0.198203921601053	0.0128582203449021	0.989740907204032	0.996200059710885	Kctd18	liver
5636.51393884202	-0.259779167099006	0.166467979789811	-1.56053534996348	0.11863342300131	0.356524844798993	Aox1	liver
71332.2661025988	0.764637546458463	0.150710729534321	5.07354419171816	3.90473739713946e-07	3.47955488056205e-05	Aox3	liver
6130.89242106488	0.0478485964249877	0.143288365310365	0.333932181593019	0.738430734921555	0.887093347148047	Bzw1	liver
3560.81377174102	-0.0914300693250826	0.19953014110613	-0.458226856444967	0.646789467035318	0.834859914506204	Clk1	liver
416.894265402177	-0.464996732653164	0.165459155960925	-2.81034150061165	0.00494889579457035	0.0481676508160852	Ppil3	liver
708.674927343721	0.015345502502915	0.186924828933243	0.0820945114166476	0.934571557648385	0.975808224357766	Nif3l1	liver
368.726947558067	0.238287388899582	0.191895995594026	1.24175279511148	0.214327784190987	0.488746392658012	Orc2	liver
2322.0331193191	0.373550749334067	0.174072596649635	2.14594804997327	0.0318771236369743	0.164822620640377	Fam126b	liver
1673.23302103872	-0.233158381783574	0.155345016965543	-1.50090673224034	0.133379686665045	0.382437763928319	Ndufb3	liver
43.1773957967214	0.222725718010567	0.433651556752249	0.513605254132209	0.607528005403443	0.812359096082368	Gm20257	liver
4699.00705513214	-0.0112297491029487	0.125251010079931	-0.089657952425152	0.92855903041877	0.972537448714766	Cflar	liver
1294.5097838878	0.164580317387469	0.194178010932445	0.847574432332231	0.3966750183475	0.666015418104736	Casp8	liver
1581.8255809932	0.516056455041318	0.154495248051879	3.34027396666612	0.000836957801349855	0.0137392179102664	Trak2	liver
2238.5608579065	0.254670863384471	0.157170251154189	1.62035029857292	0.105157049867451	0.333607412949745	Stradb	liver
113.376308246453	-0.0661256315924746	0.300045732028196	-0.220385176437906	0.825571189115062	0.930537000379856	Tmem237	liver
56.1305257985696	-0.0260789251558453	0.444975913759521	-0.058607498404822	0.953264738088133	0.983261150578774	Mpp4	liver
5950.47421213362	0.164286094288837	0.180819323627778	0.908564919903277	0.363579830839518	0.638174826416925	Als2	liver
1328.24298025222	-0.487664931603535	0.254122211683524	-1.91901734355617	0.0549821389563647	0.229028785195661	Fzd7	liver
580.137768014961	-0.166422364214282	0.165913980478339	-1.00306414043276	0.315829915150905	0.594923693628441	Sumo1	liver
826.756770309561	0.192863947776384	0.166171382250721	1.16063274653026	0.245791282461603	0.523852060545061	Nop58	liver
2430.51887311827	0.361685087452763	0.172607959168759	2.09541372943957	0.0361342301017534	0.178650266306268	Bmpr2	liver
520.596324081716	0.356719152544897	0.223191371528179	1.59826587426951	0.109983818743176	0.341780913756165	Fam117b	liver
545.985283402484	-0.136817282347309	0.185719588058378	-0.736687410184768	0.46131246474732	0.716908532606932	Wdr12	liver
201.295100963585	0.352137429081292	0.245757395688839	1.43286605106747	0.151896120813501	0.410354891845143	Carf	liver
1563.43746986354	0.336840691168912	0.150035076144306	2.24507961621543	0.0247630219245315	0.139596604382434	Nbeal1	liver
510.908166111925	-0.259687259386174	0.157538490707496	-1.64840514987755	0.0992695599511817	0.323898238734124	Cyp20a1	liver
255.003081517019	0.609591579688034	0.241859418720295	2.52043762824475	0.0117209008596688	0.0858227140314487	Abi2	liver
4361.95798995425	0.907463876656471	0.122607676452643	7.40136264638354	1.34794057346579e-13	7.2544292806184e-11	Raph1	liver
63.0783759334525	-0.664451216096547	0.465620063367209	-1.4270244527082	0.153572846460843	0.412660563530029	Icos	liver
392.641482622204	0.00266880380604223	0.169948290488274	0.0157036225452728	0.987470836981021	0.995181855752765	Pard3b	liver
825.856428101827	-0.0464555309530885	0.313853672231521	-0.148016528284619	0.882329724238335	0.951928465021608	Nrp2	liver
1347.37884908997	0.343540004686882	0.161229390438597	2.13075298338808	0.0331094975973719	0.16877426105779	Ino80d	liver
7622.33281690993	0.159193008588872	0.136550506543025	1.16581778141345	0.243688126396042	0.521167672985668	Ndufs1	liver
6730.38366725315	-0.268024306244421	0.149140318140919	-1.79712843304498	0.0723152327799675	0.2693350620257	Eef1b2	liver
728.706116952992	-0.420390464633305	0.287460250244897	-1.46242989865611	0.143623441249696	0.397681387462904	Adam23	liver
912.529525816058	-0.253682574632547	0.18729204722792	-1.35447595553182	0.175584579390761	0.440701541846621	Fastkd2	liver
76.1051452390013	-0.05082037051349	0.361216915119945	-0.140692111543599	0.888113177183872	0.95419291261091	Klf7	liver
1153.71224016893	0.151367442352801	0.152223859169742	0.994373964622814	0.320040838458929	0.598186553565053	Creb1	liver
376.792980470193	-0.402083987896505	0.173143366543048	-2.32226042455133	0.0202189171353056	0.122105207398457	Mettl21a	liver
50.3874322085099	-0.127774982297451	0.52062626403497	-0.245425540592529	0.806126955089338	0.923525464757209	2810408I11Rik	liver
154.500927099353	0.950462404153189	0.290783885864005	3.26862130385625	0.00108072840844742	0.016775693875642	Ccnyl1	liver
589.795981133127	-0.483196838073831	0.206926867135436	-2.33510923333882	0.0195377150985258	0.119612576404715	Fzd5	liver
171.579629739913	0.343904071162324	0.235565635085709	1.45990764330798	0.144315458317133	0.399106888173589	Plekhm3	liver
31064.0077549642	0.200673288992403	0.167235477594632	1.19994448473919	0.230160901740563	0.507205650840625	Idh1	liver
1598.07302462812	0.143967889378554	0.168384765357317	0.854993556412606	0.392554714961079	0.663550224772847	Pikfyve	liver
38.5940631683815	0.542266745040909	0.472233027682768	1.14830330208328	0.250843376431284	0.5294557551469	Map2	liver
1572.38734382723	-0.0950384867157818	0.182662815919068	-0.520294654594016	0.602858220989794	0.80975861797472	Rpe	liver
633.46251251091	0.0263031591319397	0.187370106922103	0.140380765982457	0.888359153885469	0.95419291261091	Kansl1l	liver
9131.56619133185	0.257685296412432	0.116646105777238	2.20912043908727	0.0271662648312655	0.148213227174659	Acadl	liver
1045.89204347847	0.000325981972267857	0.150048011044758	0.00217251778279567	0.998266582966611	0.999069324872201	Lancl1	liver
242669.577319487	-0.184717030038256	0.184173530028868	-1.00295102129662	0.315884493545944	0.594923693628441	Cps1	liver
129.905334226542	1.41418856506905	0.31508097063476	4.48833378359864	7.17823987899594e-06	0.000356835643571575	Erbb4	liver
1169.60110428117	-0.506114626023929	0.165645436867531	-3.05540940695321	0.00224753490533849	0.0280808540483388	Atic	liver
97002.4301434138	0.361535521818869	0.204308126102951	1.76956016735571	0.0768004393758643	0.278285929425195	Fn1	liver
929.777618923468	-0.0259972081156727	0.225589648578334	-0.115241139296537	0.908253991431265	0.963773089610842	Gm8883	liver
2244.50360138386	-0.154741810234855	0.268066259531145	-0.57725209620003	0.563769169046594	0.786957663354014	Mreg	liver
9541.22891531068	-0.503006937049082	0.173324982309364	-2.90210291873146	0.00370666741903671	0.0396891803784399	Pecr	liver
1399.89935823349	0.0200517485476501	0.162931064967605	0.123068909858515	0.902052530429291	0.96041644183111	Xrcc5	liver
709.442510155409	0.0878591316813717	0.158570449898151	0.554070015805614	0.579530929601139	0.796999804396114	Smarcal1	liver
3634.99850473653	-0.188794830805393	0.142425505849409	-1.32556896799799	0.184982510761062	0.452606092970244	Rpl37a	liver
12472.9415970142	-0.944713077429591	0.234553959331004	-4.02770040686632	5.63250515685207e-05	0.00169822147962232	Igfbp2	liver
293.375991430807	0.123850226271717	0.263787021513231	0.469508414634056	0.638706271611621	0.831392548022609	Igfbp5	liver
6213.39093346145	1.06715505477158	0.177051082728981	6.02738508188123	1.66633652097747e-09	3.23323037860628e-07	Tns1	liver
4855.4804963857	-0.128388439481642	0.136433101671343	-0.941035847670747	0.346686488979723	0.62257627443291	Arpc2	liver
6766.36383786359	0.00488448021835619	0.11927990224203	0.0409497335808099	0.96733596900899	0.989461075348878	Aamp	liver
4800.0748679276	0.138803634631611	0.185774571248194	0.747161647038173	0.454965991919776	0.713218775448907	Pnkd	liver
2489.52396683944	-0.0790117710818525	0.124533918935	-0.634459846422179	0.52578076362584	0.762340916767368	Tmbim1	liver
362.759434188329	-0.191535870833913	0.241373947274511	-0.793523381444651	0.427472952272077	0.691723391312085	Slc11a1	liver
4659.07610985397	-0.0518994886873439	0.126465977376051	-0.410383011812094	0.681525006192536	0.854748313646394	Ctdsp1	liver
436.706608885068	0.231837618254625	0.15793775309398	1.46790500506027	0.142130028467499	0.396618938173049	Usp37	liver
1085.27000570413	0.157650836698945	0.155314374409249	1.0150434388226	0.310085121418768	0.589228581833328	Rqcd1	liver
301.352526234672	0.316813435091316	0.239552963368006	1.32251937374125	0.18599526238558	0.453816405883756	Zfp142	liver
587.746236959421	0.0449024262769576	0.182093573866462	0.246589845668506	0.805225663901393	0.922987036637729	Bcs1l	liver
637.490582353943	0.381613537683292	0.184249658889671	2.07117635920185	0.0383423180197468	0.184174629800608	Rnf25	liver
756.352307318977	0.600396743050739	0.196207224507339	3.06001343507247	0.00221327062808052	0.0278510937822266	Ttll4	liver
24551.8247072543	-0.393450316562605	0.149851790541024	-2.62559636519587	0.00864973208173252	0.0707865829545865	Cyp27a1	liver
87.3541928732708	0.283630549526957	0.308633706316259	0.918987601556127	0.358102057285507	0.633431517298139	Ihh	liver
147.566017993708	0.367187834327665	0.242612607657807	1.51347383745846	0.130159341844443	0.377214377833931	Nhej1	liver
2760.70568448382	-0.140608238989716	0.165518991550313	-0.849499128001723	0.395603615210975	0.664803040232796	Cnppd1	liver
8672.6151452294	0.00830814359860913	0.124528763514752	0.0667166633966049	0.946807268396329	0.980214409535959	Fam134a	liver
1084.00751258419	-0.302578787947294	0.159052631056933	-1.90238153205391	0.0571212936193523	0.234448707690484	Zfand2b	liver
3654.6873924613	-0.132492015009367	0.126513924649103	-1.04725242993485	0.294983169672434	0.573993631960192	Abcb6	liver
4355.47303013014	0.212159425469876	0.134561550652486	1.57667197235109	0.114871022663448	0.350824676984329	Atg9a	liver
873.80963152066	0.132721631422503	0.134445937450858	0.987174725684922	0.32355698980392	0.60141957056242	Ankzf1	liver
150.528219897936	0.0758633593896549	0.262425495749802	0.289085323714063	0.772516084333499	0.906313881508063	Glb1l	liver
3049.84631653725	-0.171295354640414	0.151698998615887	-1.12917920489473	0.25882224422201	0.536425933096884	Stk16	liver
8443.37383488682	0.0280466006628589	0.23955296587995	0.117078912213987	0.906797520411104	0.962778942427789	Tuba4a	liver
2332.307473791	-0.155733955836657	0.153287470694663	-1.01596011161844	0.3096483817434	0.58857165940482	Dnajb2	liver
2386.11611364268	-0.000553098468014385	0.155344355757184	-0.00356046710109587	0.997159164272968	0.998696034369571	Dnpep	liver
143.252885173865	0.0895717910163594	0.267960984954533	0.334271763598562	0.738174495552017	0.887093347148047	Des	liver
1168.26664666796	0.400030026839515	0.152717144267899	2.61941793606208	0.00880799622831465	0.0717401453125425	Gmppa	liver
47.8454141098132	-0.0724789938016301	0.46007870556483	-0.157536075730019	0.874822378516569	0.949622869542771	Chpf	liver
397.485597210422	0.0497724587338609	0.183607823303896	0.271080272279469	0.786329294135983	0.91363437163977	Stk11ip	liver
2017.68253478312	-0.344230118773046	0.208971406515974	-1.64725942420612	0.099504734172666	0.324225880849722	Farsb	liver
2240.09267284868	0.659773827920149	0.201759086114915	3.27010713928574	0.00107506757686686	0.016752672214648	Acsl3	liver
257.648413688326	0.393429023578744	0.208672617472245	1.88538883704314	0.0593773600278403	0.239235541666991	Utp14b	liver
1105.78879706555	1.16531015569726	0.231775803575663	5.0277472355601	4.96275427453211e-07	4.14596763351537e-05	Wdfy1	liver
981.154336617062	-0.16683662297241	0.13278549553305	-1.25643710032234	0.208957537548284	0.482339153207277	Mrpl44	liver
132.67444031666	-0.122973731749921	0.513537173225809	-0.239464128716244	0.810745708525708	0.925269981364602	Serpine2	liver
3519.16800180993	0.226444234176317	0.121380050986828	1.86558031847334	0.0621001053451491	0.245825688483759	Cul3	liver
331.319107449792	-0.464856595313167	0.208197746521909	-2.23276477809643	0.025564460126877	0.142310013520757	Dock10	liver
1648.61997873809	0.331480460032685	0.219394092892054	1.51089054250782	0.130816340842223	0.378298216425946	Irs1	liver
1294.72865480939	0.127841511892459	0.140326272154586	0.911030485806864	0.362279311040045	0.636980431425276	Rhbdd1	liver
34.4724442662126	0.0593450140344711	0.503304807504884	0.1179106838432	0.90613842782191	0.962377088964207	Col4a3	liver
1708.69623121842	-0.0236333028364977	0.136591772072952	-0.173021423456424	0.862634588099119	0.944725776463888	Mff	liver
909.69179943867	0.0515381561547636	0.138896635433168	0.371054028731761	0.71059729039946	0.871245196710468	Agfg1	liver
6429.88759449092	0.16405872082333	0.129890199497662	1.26305696240218	0.206568709322859	0.479687080734233	Pid1	liver
8542.18968081671	0.229497439473304	0.12453006968075	1.8429078218751	0.0653424700748969	0.252836897716632	Trip12	liver
230.805540209726	0.0420572928071305	0.233141934923459	0.180393513594789	0.85684364619717	0.942712265753036	Fbxo36	liver
68.7910428652646	-0.552183006302727	0.336897128819541	-1.63902556319648	0.101207935927979	0.327055853782581	Sp110	liver
210.704444856096	-0.282122809319798	0.241107224173056	-1.17011346419593	0.241955310807152	0.51893784792477	Sp140	liver
328.367293815167	-0.218455884275936	0.188866347988444	-1.15666918221611	0.24740754521641	0.525200770946428	Sp100	liver
3897.94571056433	0.28639949833107	0.120563633935234	2.375504859823	0.0175249616217317	0.112380217648951	Cab39	liver
1634.42954424567	-0.0633291985177112	0.157249870870142	-0.402729733050202	0.687147058185569	0.857797071318818	Itm2c	liver
4437.40290548382	-0.10871250072383	0.164925195468584	-0.659162479177045	0.509791438085434	0.7526272782348	2810459M11Rik	liver
6655.91321423058	0.182748286729596	0.15157788016263	1.2056395467038	0.227956503837303	0.504398582683123	Psmd1	liver
201.415467640004	-0.264776542839554	0.230098025925601	-1.15071192712086	0.249850768069865	0.528243363775128	Armc9	liver
8683.52741220128	-0.116679084668182	0.147301364115842	-0.792111365488934	0.428295743618698	0.692340472417756	Ncl	liver
2260.99400241973	-0.219063872736289	0.138855610106569	-1.57763789715203	0.114648820892677	0.350680222562652	Ptma	liver
202.248751801257	0.136242485769725	0.205993042953562	0.661393626776215	0.50835991202796	0.751654953480792	Pde6d	liver
670.575013265307	0.0656320327217514	0.173442725117375	0.378407527195713	0.705127877311434	0.868013877277646	Cops7b	liver
807.795082623635	-0.28768151880721	0.163190691926058	-1.76285494847683	0.0779249570497002	0.280416601656204	Dis3l2	liver
2082.43109918015	0.173938746507027	0.134204783750865	1.29606964554947	0.194951491598025	0.466626829272631	Eif4e2	liver
2121.9315135561	0.13904009219804	0.1457140150589	0.954198483528424	0.339983182135017	0.615357971867709	Gigyf2	liver
1445.666607452	-0.264980310188108	0.213441878441158	-1.24146354091031	0.214434558689297	0.488746392658012	Ngef	liver
97.8897499714545	-0.187583554437741	0.330018193642003	-0.568403676074985	0.569760894870306	0.790533738828358	Neu2	liver
250.691369496001	-0.28587730151097	0.212874750349495	-1.34293663781928	0.179292491667486	0.445362105050558	Inpp5d	liver
1683.75488497014	0.127106398744882	0.138491997642379	0.917788759702225	0.358729468054958	0.633702716696204	Atg16l1	liver
1469.08656940639	0.534575627503012	0.187686680786355	2.84823422345842	0.004396255612956	0.0446303417922875	Dgkd	liver
2654.08752629942	0.794331091587448	0.122222520017808	6.49905673252123	8.08251798606816e-11	2.20983389482727e-08	Usp40	liver
44.5892591649659	-3.17652903575884	0.784373749401899	-4.04976459013449	5.1269181223918e-05	0.00157741240440853	Ugt1a10	liver
2171.06571802203	-1.22987134689432	0.900870966390986	-1.36520255705581	0.172189394915826	0.437381423318705	Ugt1a9	liver
1579.52678833931	0.0775061835751093	0.170366063935096	0.454939098696538	0.649153053325671	0.836421216730868	Ugt1a6b	liver
1687.50150858725	0.0132241128798219	0.165343010555559	0.0799798723598195	0.936253264209888	0.976430582439962	Ugt1a6a	liver
1215.29780912991	0.167870720683011	0.243817327727167	0.688510214790226	0.49113153996033	0.738974416035778	Ugt1a5	liver
10596.6787811828	-0.0992604616859134	0.175137817497372	-0.566756301433314	0.570879763411223	0.791116640230045	Ugt1a1	liver
76.334183318276	0.49222117350777	0.378404703881528	1.30077974311301	0.193333857643238	0.464325475633491	Mroh2a	liver
295.741127611174	0.945071938230129	0.218665042509456	4.32200742919051	1.54615981411091e-05	0.000620010085458476	Hjurp	liver
4554.02661811486	-0.136674278256142	0.182343811757483	-0.749541632034754	0.453530815705578	0.711989522763683	Spp2	liver
136.901924687747	-0.427251144780176	0.272223382509678	-1.56948731163822	0.116534433700511	0.353647910817287	Arl4c	liver
80.1986311315871	0.529021820315281	0.42802728926892	1.23595348609399	0.216475853881033	0.491359343809214	Sh3bp4	liver
462.176874418927	0.389010798457433	0.186696278689824	2.08365587781068	0.0371914803482917	0.181432890750182	Agap1	liver
1240.91855375087	-0.194260257349168	0.153938225694826	-1.26193644543025	0.206971656369175	0.480298809051153	Cops8	liver
181.314373093148	0.460534665744583	0.241769156610573	1.90485284475879	0.0567992023782236	0.233764763807742	Col6a3	liver
54.0715994311825	0.884053622263094	0.451352217006966	1.95867792148111	0.0501505176695721	0.216862231331759	Mlph	liver
1253.67841839504	-0.727742410654357	0.144593229753814	-5.03303240333878	4.82781483481564e-07	4.11905052927887e-05	Rab17	liver
2097.97419918263	0.27738593895886	0.137444092409805	2.01817287375148	0.0435732602093681	0.198555424363143	Lrrfip1	liver
132.283452223238	-0.181016501870735	0.270748187214166	-0.668578813890816	0.503764190939445	0.748830250463551	Ramp1	liver
991.168481890947	0.0680932664668315	0.18664417437948	0.364829315960252	0.715238820219541	0.873624023478635	Ube2f	liver
4933.54963249007	-0.113625239581401	0.137293057940823	-0.82761096071133	0.407890858892987	0.676479569770411	Scly	liver
1292.74962849796	0.0791122061906098	0.143270769177374	0.55218665080709	0.580820479365981	0.797542559841657	Ilkap	liver
3176.97608359644	-0.0365338401309528	0.248876746844637	-0.146794911915814	0.883293900880574	0.952494229795025	Hes6	liver
782.726075371691	1.21010328213427	0.663035008702921	1.82509711591485	0.0679863753476086	0.25956080464352	Per2	liver
347.594217545942	0.0773042482282125	0.220573260556699	0.350469717104904	0.725986213018134	0.880227186314065	Traf3ip1	liver
524.916554200714	0.00654033177616186	0.209672531619555	0.0311930786815181	0.975115559642111	0.991936426728784	Asb1	liver
245.066122515695	0.147534487944079	0.20788876058978	0.70967996309913	0.477902620191397	0.729775135935834	Hdac4	liver
5575.84312253376	0.0177464665824573	0.139357245875623	0.127345129928127	0.898667242522213	0.959270502449393	Ndufa10	liver
1179.43039018736	-0.379573933851263	0.203741459441212	-1.86301764448088	0.0624597838172242	0.247005653951745	Myeov2	liver
115.707317441221	-0.824939099588991	0.292600400877631	-2.81933687416235	0.004812298404835	0.0472973446161479	Gpc1	liver
267.443605206157	-0.554461527482913	0.212783724441723	-2.60575158620635	0.00916729213082892	0.0734237845099014	Dusp28	liver
2766.11284956644	0.155394121964433	0.139492952245218	1.11399263879125	0.265282344652388	0.543360113177932	Rnpepl1	liver
1068.21910095916	-0.0350709023314802	0.161451759675968	-0.217222174610342	0.828035204398538	0.931655771503406	Capn10	liver
35.0229111264869	-0.284164863206799	0.505392189402244	-0.562266036487221	0.573934774899444	0.793515149184609	Gpr35	liver
16749.9311213064	0.253010041872084	0.147694444679159	1.71306403854055	0.0867007589891984	0.298606118939104	Agxt	liver
514.5710368482	0.809544925380576	0.198533298458686	4.07762794284628	4.54974947014653e-05	0.00144797582343552	Sned1	liver
1100.95509570877	0.077883189663206	0.153482227701146	0.507441094840354	0.611845357528655	0.814484856818604	Mterf4	liver
1145.53001225388	0.191826212065977	0.154790265626333	1.23926534585224	0.215247247812418	0.489679347803212	Ppp1r7	liver
32964.3304107365	0.172367536087667	0.149220923535698	1.15511640059266	0.248042762936132	0.52617782368571	Hdlbp	liver
3952.40103564793	0.0220660225720048	0.12509492764892	0.176394223065009	0.859984242834751	0.943426084379177	Sept2	liver
1038.77357940175	-0.0910875380434077	0.156833090383094	-0.580792853223191	0.56138007235871	0.785092720909444	Farp2	liver
2263.48343913964	0.0339693067197832	0.139051130972426	0.244293638478348	0.807003410009446	0.92397247170807	Stk25	liver
518.271289038778	-0.657149871399107	0.227558574445026	-2.88782733413485	0.00387912749457765	0.0410069453073543	Bok	liver
635.112755811643	-0.197625218644918	0.175362154623948	-1.1269547814847	0.259761599863503	0.537114480295281	Thap4	liver
1592.26750722502	-0.0469456286775526	0.141637194119967	-0.33144986364097	0.740304705609962	0.887758876470226	Atg4b	liver
537.689509857945	-0.574905642507686	0.196709748236984	-2.92260880642822	0.00347112318657653	0.0379269863165447	Dtymk	liver
607.933286155873	-0.103439645701536	0.166490530815979	-0.621294467586672	0.534405893139274	0.767587310783899	Ing5	liver
1200.34427010078	0.0344614998604533	0.14941996213859	0.230635179980099	0.81759823464249	0.926886142736334	D2hgdh	liver
365.789456334049	-0.309950354687711	0.249271067319763	-1.24342691681144	0.213710556562133	0.488019518363332	Fam174a	liver
63.082614431656	-0.244849013316772	0.388592673937689	-0.630091686587055	0.528634598551567	0.763442283382396	St8sia4	liver
452.922223277854	0.412968801105722	0.211682186033924	1.95089066700936	0.0510700531144012	0.218871656204577	D1Ertd622e	liver
2922.01817243042	0.11129852811202	0.129388501253787	0.860188711002343	0.389685026553544	0.660827582384992	Ppip5k2	liver
362.816540982871	0.516614009269253	0.211577301214389	2.44172700145075	0.0146171954754388	0.0994306969564692	Gin1	liver
967.180594396	0.100216317435338	0.137568363267685	0.728483752040674	0.466317511236288	0.720776006703398	Pam	liver
2320.52738683208	-0.31247874489176	0.190290825315283	-1.64211145952008	0.10056690722465	0.326068585209435	Rnf152	liver
1017.74795949784	0.210639353220157	0.145423537494959	1.44845433448116	0.147490028457093	0.402878805633075	Pign	liver
1579.31588157601	-0.110222266555967	0.141372197736387	-0.779660133469066	0.435590950545044	0.698315449767708	2310035C23Rik	liver
43.4245321988752	-0.664206797283521	0.410752896646392	-1.61704714125321	0.105868105494564	0.334383279127614	Tnfrsf11a	liver
2230.79130572661	0.393471896940772	0.200719759279104	1.96030474704607	0.0499601815223753	0.216740347534863	Zcchc2	liver
1514.13420578817	0.0406489216946157	0.169023216488897	0.240493125968206	0.809947991603671	0.924622730972876	Phlpp1	liver
75.5698114508458	0.340999958937928	0.404206522064767	0.843628047355674	0.398877286258645	0.668500105000208	Bcl2	liver
1048.36196623796	-0.128940527398393	0.173886922650457	-0.741519404869717	0.458378570476844	0.715491657303287	Kdsr	liver
3144.95636848834	0.059133453558771	0.116180033888281	0.508981204254372	0.610765398882556	0.814183669991944	Vps4b	liver
104.338811390653	-0.759807514460063	0.326256107735264	-2.32886832290845	0.0198660425284103	0.12088441659928	Serpinb8	liver
55.4533440139244	-0.104904954421863	0.383398798905703	-0.273618370013892	0.784377915336295	0.912755496372183	Dsel	liver
2416.17599510578	-0.00872444818052973	0.122865984507229	-0.0710078400911394	0.94339151575342	0.979628824731432	Tsn	liver
971.796067685077	-0.141180581897357	0.176436094958073	-0.800179702066667	0.423606688309509	0.689395675310135	Nifk	liver
871.684330781196	0.249960539341971	0.155514795092876	1.60731034749903	0.107986305538945	0.338098036631933	Clasp1	liver
492.172287062463	0.455006271690004	0.193274165783789	2.35420119313312	0.018562561020042	0.116311459162495	Tfcp2l1	liver
66.5923658355688	0.703434619350157	0.437084874342713	1.60937763039268	0.107533793599282	0.337939272988339	Inhbb	liver
565.151460374382	0.0765108658470516	0.157384203227722	0.486140694414845	0.626867415974986	0.823546468732017	Ralb	liver
404.235015696824	-0.242172623701609	0.169829070615919	-1.42597861969874	0.15387451364281	0.412911332270876	Tmem185b	liver
2895.03828679158	0.352935346516059	0.180155507966944	1.95905942870655	0.0501058274260742	0.216814161841095	Epb4.1l5	liver
369.045338371335	0.220694502105722	0.224463278597455	0.98320983051089	0.325504177515864	0.603084353068428	Ptpn4	liver
505.399197308508	-0.309447234937292	0.152966626645918	-2.02297221114504	0.0430760126295205	0.197025982585518	Tmem177	liver
2922.02795742433	0.062727153053698	0.166003860158604	0.377865629111077	0.705530416698861	0.868013877277646	Tmem37	liver
30745.0163587168	0.0874186543414378	0.138712216123583	0.630215973649748	0.528553289639184	0.76341650550599	Dbi	liver
1369.39467266655	-0.0357422766087159	0.190628824662645	-0.187496705558401	0.851271206471247	0.941027573950341	Steap3	liver
202.096169294161	0.0409967851623109	0.853955160763343	0.0480081238992271	0.961709768138861	0.986642376830163	Marco	liver
17668.4894874762	0.4184413669247	0.266563724111276	1.56976110804193	0.116470698733164	0.353647910817287	Insig2	liver
999.086305057042	0.0180713899808021	0.140900595704474	0.128256306443907	0.897946141861273	0.95892517413148	Ccdc93	liver
434.528480829768	0.00284118375654542	0.165551788560818	0.0171619031195285	0.986307454616561	0.995181855752765	Ddx18	liver
1890.539760568	-0.146384559537739	0.138915979308886	-1.05376329106276	0.291991303971705	0.571210303147464	Actr3	liver
2525.97771118378	-0.254290769204708	0.12890959179207	-1.97262876772488	0.0485378729662187	0.213222361808842	Slc35f5	liver
131.689275029277	0.0657901658450279	0.243473160122713	0.270215270594381	0.78699464529861	0.913748020316373	Gpr39	liver
189.382796211331	-0.331025505212479	0.269358639311013	-1.22893962510058	0.219094443312596	0.494503968677398	Mgat5	liver
875.612037446312	-1.18775951842731	0.310175086864067	-3.82931953186763	0.000128498074578447	0.0033030594811511	Acmsd	liver
1084.14188362315	0.21320664589429	0.143183736705321	1.48904233679192	0.136476220589561	0.387127784412266	Ccnt2	liver
2270.1561235147	0.135843897205498	0.120368170653729	1.12856992399003	0.259079304133792	0.536520757617187	Rab3gap1	liver
200.048196697924	-0.173744113256785	0.230811398687198	-0.75275360855227	0.45159798895016	0.710067155544429	Zranb3	liver
1264.40749711667	0.683727423638339	0.151139399362321	4.52381990747008	6.07334075849051e-06	0.000314775388538607	R3hdm1	liver
4284.78712956241	0.0410985530244032	0.164754420772752	0.249453415766554	0.803010070886553	0.922214351069779	Ubxn4	liver
194.477589497808	-0.333795110809199	0.334190332190569	-0.99881737637717	0.317883166872459	0.596672299079732	Mcm6	liver
4277.8841616827	-0.246300816982069	0.164986433243157	-1.49285497080278	0.135475154285838	0.385743457055296	Dars	liver
719.275316747837	-0.244976007131243	0.224189782168357	-1.09271709335654	0.274518032359753	0.553086795512976	Cd55	liver
32466.0663459316	-0.0494045383396153	0.154732224390189	-0.319290558474953	0.749506191547909	0.893822274498444	C4bp	liver
2008.38436177572	0.609035498474532	0.137998439595715	4.41335061656338	1.01782957101923e-05	0.000469554499696712	Pfkfb2	liver
482.243123266768	0.975980553769246	0.221126750472556	4.41367022164228	1.01632737521461e-05	0.000469554499696712	Yod1	liver
57.5521094923873	1.03631834955784	0.378595238162838	2.73727254095074	0.00619509450805583	0.056289265054314	AA986860	liver
81481.597610124	-0.393720740067057	0.18739183104691	-2.10105604853446	0.035636046452235	0.177149437529086	Pigr	liver
3783.11464619616	0.226921446361264	0.128739947807927	1.76263428892964	0.0779621900457801	0.280416601656204	Mapkapk2	liver
54.2755694561052	0.482418162851224	0.457918176475346	1.05350297855494	0.292110529884317	0.571303800115157	Dyrk3	liver
1654.66585187849	-0.0267202246825893	0.138535205785278	-0.192876781978468	0.847055468894393	0.939387601306414	Eif2d	liver
808.244916091543	0.34056061812556	0.204030964944245	1.66916143448434	0.0950853907886701	0.315639418098152	Rassf5	liver
1037.98754153195	0.0613052708051106	0.175251430325482	0.349813240846323	0.726478861368078	0.880558257154457	Ikbke	liver
1072.65441101163	0.300816747488534	0.177472455799807	1.695005267904	0.0900744214575906	0.306152991719038	Srgap2	liver
55.5361417573165	0.287978711705856	0.390181103807742	0.73806421914208	0.460475425620363	0.716294062158485	Fam72a	liver
283.717913491819	5.38529168151826	1.34840677314746	3.9938183260144	6.50176885016325e-05	0.00192121536543852	Ctse	liver
51.6302129102944	-0.187117088531843	0.379328842513279	-0.49328463212046	0.6218114854873	0.820758412377904	Rab7b	liver
8124.86311416454	0.21922985698122	0.15916602327566	1.3773659256507	0.168399142186352	0.432218343934633	Pm20d1	liver
589.067781953955	0.763966605393229	0.283135224272152	2.69823935667891	0.00697073004341013	0.0612623134004112	Slc41a1	liver
458.920151012458	-0.647539271235431	0.162863394150988	-3.97596571415618	7.00942244285649e-05	0.00203120228425212	Rab29	liver
3319.28198810977	0.159415182616814	0.135659599192725	1.17511170286108	0.239950029235568	0.517589896306955	Nucks1	liver
2533.13187764237	-0.21708556824728	0.296184156527959	-0.732941190346174	0.463594299051578	0.718598043756021	Slc45a3	liver
1307.39951672173	0.275424427652713	0.160013364462335	1.72125889970612	0.0852038540312034	0.295815978065044	Elk4	liver
384.38051559441	0.205677136948486	0.172369809094263	1.19323179638732	0.232778605192563	0.50943317785719	Mfsd4	liver
1585.49449211437	0.245503266059638	0.167689999764018	1.46403045145877	0.143185628263619	0.39748913930871	Cdk18	liver
184.463677111798	0.556964496279999	0.286694947689476	1.9427077483181	0.0520514795188803	0.221646760253544	Klhdc8a	liver
567.541822863337	-0.457382420041616	0.201572401593637	-2.26907263308637	0.0232639092862693	0.13384257709891	Nuak2	liver
140.105182490067	-0.523929840346636	0.334671873609147	-1.56550305436936	0.117465001771651	0.35517612653949	Tmcc2	liver
1077.37646039275	0.496085652099088	0.159051231169682	3.11903056927515	0.00181447135165341	0.0240397470929412	Dstyk	liver
1163.08735987383	-0.0741856044110998	0.135188399964597	-0.548757174657942	0.58317210339526	0.798792768040122	Rbbp5	liver
116.584742979477	0.299777770925896	0.29624639903143	1.01192038757606	0.311576120398886	0.590531680783363	Tmem81	liver
71.7469038826616	-0.652337489594376	0.366160008958155	-1.78156399834731	0.0748203597394917	0.274576838329829	Nfasc	liver
2754.92482373443	0.21037066806024	0.119583818377683	1.75919008871102	0.0785452271434553	0.281331673415412	Mdm4	liver
413.211990306567	-0.523182190280042	0.202128944413975	-2.58835859355465	0.00964345319593681	0.0758736049359842	Pik3c2b	liver
6062.77286794216	0.17181559890799	0.125323375482515	1.37097806571577	0.170381793754598	0.434994265464307	Ppp1r15b	liver
3451.9146407864	0.332149621028817	0.174768013392191	1.90051723185438	0.0573652757978265	0.234749254374592	Plekha6	liver
45.9696120794221	-0.604894706813371	0.449993041571551	-1.34423124566736	0.178873620704781	0.444872784179969	Gm19461	liver
889.595441493403	0.114491226328609	0.14214920338341	0.805429953904136	0.420571612242028	0.687604448388034	Golt1a	liver
12267.7757452937	0.22935813407281	0.222385779112938	1.0313525216751	0.302375536904882	0.581640183716938	Etnk2	liver
348.330660669488	-0.186859529708776	0.186735905783904	-1.00066202546507	0.316990232350418	0.595563407024133	Sox13	liver
696.79953446849	-0.268735407716627	0.18807555044487	-1.42886944677799	0.153041760500858	0.412309880095281	Snrpe	liver
4557.94020543605	0.0548614588884947	0.12255199343089	0.447658641468222	0.654399574481003	0.840214858327221	Zc3h11a	liver
2199.69845865346	0.0172677052496642	0.121840046618393	0.141724381506084	0.887297715673972	0.953819276164586	Zbed6	liver
318.66411631844	-0.021555692630218	0.312064455988184	-0.0690744883519647	0.944930327859574	0.980098513092821	Atp2b4	liver
2002.24414022983	0.426762500718397	0.174686614987027	2.44301774781136	0.0145650209953576	0.0992064114395472	Prelp	liver
643.441331917069	-0.871519605566009	0.588670931890739	-1.48048690423153	0.138743353051016	0.391120989916687	Btg2	liver
728.980832562078	0.320913653003905	0.222528746021123	1.44212223697807	0.149267892899159	0.405897999904359	Adora1	liver
60.937619895236	-0.194930726411327	0.362351463030806	-0.537960368038461	0.590604409990595	0.802778011203563	Ppfia4	liver
7027.48430717839	0.164526724294991	0.135798408288102	1.21155119834645	0.225684225072525	0.501659502517087	Tmem183a	liver
421.739274654154	0.39576574317745	0.244349066645688	1.6196736439813	0.105302400680848	0.333711677286088	Cyb5r1	liver
5454.91035190038	0.0239788891176627	0.128260680976386	0.186954325636845	0.851696444320143	0.941027573950341	Adipor1	liver
913.0691512207	0.0352372811585779	0.153512887859918	0.229539562767734	0.818449574701845	0.927090427343395	Klhl12	liver
760.326059792785	-0.365858199755204	0.187382741810048	-1.95246475860663	0.0508830510584369	0.218381414282196	Rabif	liver
1516.93146611666	0.0157739752850279	0.244117660813665	0.0646162806593016	0.94847952170826	0.981016993048781	Kdm5b	liver
103.612371418728	-0.127705734474017	0.266515083644606	-0.479168881279194	0.631818490342445	0.826637706682518	Ppp1r12b	liver
667.253401083091	0.194209771559318	0.178725697509454	1.08663596934092	0.277197722087236	0.556383363219908	Arl8a	liver
1982.73149737261	0.481324359618825	0.172203343635052	2.79509299563246	0.00518847877179443	0.0500540494183537	Rnpep	liver
1046.12939735379	0.122671273136775	0.147181950629595	0.83346682532762	0.404581500156849	0.673257195445667	Timm17a	liver
2002.18661070996	0.279200220239911	0.122709518327207	2.27529391400118	0.022888304291359	0.132825036480969	Ipo9	liver
275.33228281739	-0.259844854387499	0.248880458878897	-1.04405486697506	0.296460005515846	0.575421151590678	Nav1	liver
474.402350567115	0.0801825276061653	0.235920276546096	0.339871285249611	0.733953461822316	0.885070183011474	Csrp1	liver
270.991255349633	1.18205488859616	0.265388323960189	4.45405762754463	8.42624679827239e-06	0.000400663039459355	Lad1	liver
750.446792623596	-0.352986115738641	0.183039084442675	-1.92847400222432	0.0537961949132107	0.226440946398154	Tmem9	liver
176.195192042951	0.027386641740091	0.269641752128947	0.101566769700392	0.919100556944546	0.96814785739911	Kif21b	liver
1261.57492527567	0.136561473419614	0.14919965049297	0.915293520919132	0.360037559554268	0.634684281465904	Camsap2	liver
268.47540727831	0.191948014941376	0.204621910371834	0.938061884929983	0.348212607943441	0.624414138482781	Ddx59	liver
1435.45822594955	0.243406750017987	0.15436622007975	1.57681356641522	0.114838429126076	0.350824676984329	Zfp281	liver
2991.98836901871	0.139424358662594	0.126280912545125	1.10408101947134	0.269557993987374	0.54765264866411	Nr5a2	liver
642.461331911259	-0.28500477780308	0.218348653477151	-1.30527380528547	0.191799630360058	0.461931842488788	Ptprc	liver
3697.24325185288	0.681216588026172	0.134753092225342	5.05529466356886	4.29726759312022e-07	3.77344008359388e-05	Nek7	liver
80.9434858368761	-0.662444195664725	0.349187221652178	-1.89710320019837	0.0578143189409167	0.236004837753386	2310009B15Rik	liver
1483.92243075289	0.51383932584651	0.1476505969278	3.48010327447422	0.000501220534534708	0.00942137973508209	Dennd1b	liver
1348.32233540002	0.279897576747165	0.182402687254522	1.53450358084144	0.124905813000847	0.367657678101344	Zbtb41	liver
35.8955174215872	-0.0173646184326216	0.543682182153408	-0.0319389139512427	0.974520765613094	0.991936426728784	Aspm	liver
14493.2674499834	-0.0436804590873285	0.125139240067727	-0.349054853327287	0.727048129207844	0.881070715661365	F13b	liver
8253.3957910332	-0.402198147161673	0.135647412983894	-2.9650263010134	0.00302657053071164	0.0342517812647799	Cfhr1	liver
18381.6186777612	-0.0670847170897669	0.126328762788693	-0.531032803685237	0.595396047466856	0.80542161824202	Gm4788	liver
20343.3022922006	-0.240436825053028	0.143917775566804	-1.67065412250915	0.0947900155226367	0.314956400129523	Cfhr2	liver
55744.9251088288	-0.13801336146645	0.133407517186004	-1.03452462333157	0.300890971638514	0.579618637119508	Cfh	liver
100.251825078639	-0.0927696685104963	0.388624150597475	-0.23871308143838	0.811328072447595	0.925490454864997	Kcnt2	liver
585.397796338209	0.135592670645151	0.155820492635161	0.870185097942339	0.384199258388388	0.655033599548229	Cdc73	liver
1043.12835218563	0.0696951125631175	0.131753544672072	0.528980929785118	0.596818679008716	0.806258136830416	Glrx2	liver
291.920046733458	0.274965398342554	0.256739465556151	1.070989992703	0.284173929332405	0.56319808399816	Trove2	liver
739.307051682419	-0.0341294730372086	0.162254669894035	-0.210345089355503	0.83339834616343	0.933083178022857	Uchl5	liver
254.381498685723	-0.350022625240015	0.233203441067675	-1.50093250613073	0.133373019526429	0.382437763928319	Rgs2	liver
47.7572732805353	0.484373961411215	0.506149187886746	0.956978639901713	0.338578036369294	0.613972532035364	Rgs1	liver
114.75342773252	-0.60103579990851	0.311341392765571	-1.93047186745602	0.0535483977051103	0.225792928283378	Pla2g4a	liver
2250.58470247416	-0.100819184473252	0.129214112533703	-0.780249018441819	0.435244314647114	0.697945761824151	BC003331	liver
4106.44808073981	0.120505029135607	0.122677476593268	0.982291391068761	0.325956314517948	0.603084353068428	Tpr	liver
2482.57539353337	0.296281937692704	0.252760386341634	1.17218501673061	0.241122782633114	0.518768980273267	Prg4	liver
156.287049135999	0.374585862904951	0.324742299782873	1.15348651270686	0.24871075030699	0.526944404049504	Hmcn1	liver
1392.81535077221	-0.917392490471307	0.211900291861134	-4.32935925861068	1.49543805529924e-05	0.000607774317744926	C730036E19Rik	liver
6086.61829708435	0.225028016707919	0.153073494836875	1.47006519285213	0.141544098250075	0.395718220299421	Ivns1abp	liver
862.97635503279	0.123014135265939	0.134120524805127	0.91719097762758	0.359042573832013	0.633736350964973	Swt1	liver
878.946698895972	0.174219998981023	0.162561031720225	1.07172055404313	0.28384556597655	0.562825475308702	Trmt1l	liver
1006.11709958769	0.264452945178471	0.180106124070863	1.4683173409163	0.142018042715465	0.396398388368223	Rnf2	liver
235.840465213462	-0.189272497736201	0.269778286968287	-0.701585364275261	0.482937781564764	0.732832970265808	Fam129a	liver
2667.53214624529	0.45256459681191	0.164680466651163	2.74813768757749	0.00599348343802395	0.0553350773288013	Edem3	liver
199.740556144206	0.299772415629351	0.215462939846663	1.3912945578608	0.164136123426311	0.426422434191625	1700025G04Rik	liver
139.735469777454	0.0631799917596325	0.261150783445778	0.241929167992522	0.808835048565037	0.924299749545312	Tsen15	liver
151.284393389968	2.03845444264256	0.286170066867752	7.12322733455065	1.05428709193427e-12	4.37347369516182e-10	Colgalt2	liver
765.075977243361	-0.246072250365441	0.193067624106607	-1.2745391750901	0.202472398198337	0.475359670243169	Rgl1	liver
2671.21866666932	-0.364655336060951	0.154065937541267	-2.36687837610619	0.0179388268511299	0.114098452527961	Arpc5	liver
127.51669735628	-0.321950937778274	0.313097249858239	-1.02827775690794	0.303819190992821	0.582938992979349	Ncf2	liver
1941.24301095441	0.607208742358149	0.122993636912901	4.9369118403105	7.93693272802417e-07	6.02907409219315e-05	Smg7	liver
929.121376138513	0.566018009667933	0.181261587779956	3.12265834477328	0.00179225667221356	0.023956497518588	Lamc1	liver
4001.60051817131	0.0578924536767104	0.138920552944554	0.416730659716108	0.676875425867265	0.85291833803113	Dhx9	liver
69.2750205897774	0.0126900305275389	0.403498781137225	0.0314499847850176	0.974910678751773	0.991936426728784	Npl	liver
1604.95140915202	2.1850221728634	0.972565404366648	2.24665833583329	0.0246618708923906	0.139091564386057	Rgs16	liver
186.556950244457	-0.274615017607017	0.290647931363672	-0.94483733745693	0.344741926684566	0.620017282254385	Rnasel	liver
32830.2534848539	-0.081430466722451	0.242146245662969	-0.336286307060031	0.736654974661998	0.886412303490639	Glul	liver
161.862192426404	-0.326251668964078	0.337832661615832	-0.965719736521734	0.334184440799038	0.610051414690808	Ier5	liver
353.325781854667	-0.932251334913143	0.274932545370724	-3.39083659104846	0.000696796334177828	0.0120437642243668	Mr1	liver
501.30590053582	0.248342751913598	0.188695640393928	1.31610222363987	0.18813973474533	0.457051900037624	Stx6	liver
2682.09719321667	0.403836256678793	0.140368406324207	2.876974008995	0.004015086645166	0.0419283787685304	Xpr1	liver
740.667164527782	-0.328913835972	0.161745336891494	-2.03352901723931	0.0419991050207324	0.194530240670683	Acbd6	liver
24329.7919608935	-0.121358753000892	0.210318511358669	-0.577023640082406	0.563923486016453	0.787006906818785	Qsox1	liver
2549.86972903293	0.457428073348751	0.148942941151386	3.07116315692881	0.00213226600915396	0.0271440847514519	Cep350	liver
2679.67427794119	0.13792444309113	0.127831473663573	1.07895527711837	0.280607665056604	0.559270375121577	Tor1aip1	liver
10098.3785741262	-0.15724885662893	0.117257660363878	-1.34105401848331	0.179902914805275	0.446374612104729	Tor1aip2	liver
186.211700111237	0.175068477908158	0.243808448236394	0.718057471652555	0.472721851184831	0.72565709703565	Soat1	liver
818.037289340654	0.287304182314882	0.177092628085059	1.62233846446103	0.104730897078135	0.332957899537518	Abl2	liver
409.523572762689	0.314709354134121	0.26477894827951	1.18857392620921	0.234607373187385	0.511383710716478	Tor3a	liver
1498.33802269856	0.79333958948771	0.159258215402437	4.98146728244434	6.31039545873854e-07	5.02742101778971e-05	Fam20b	liver
1516.91347830349	0.716436345609104	0.207304762028541	3.45595701033857	0.000548342767760757	0.010117428675095	Ralgps2	liver
616.501563600339	-0.384451276564377	0.193016479785405	-1.99180545097397	0.0463924079456762	0.206398175882576	Rasal2	liver
139.704533532835	-0.156633085528802	0.257674535092818	-0.607871808024726	0.54327249882996	0.772694120717716	2810025M15Rik	liver
714.614734314304	-0.608701925719409	0.166062901479621	-3.6654901263068	0.000246865336437242	0.00547931733826573	BC026585	liver
6079.48017892247	0.36018383405924	0.131524371489573	2.73853301848164	0.00617139630599768	0.0562154953190699	Sec16b	liver
709.288147710628	0.0879672096774215	0.147523126743812	0.596294368341208	0.550978592595868	0.7783316661494	Rfwd2	liver
419.883732933056	-0.68151165870342	0.232949550828391	-2.9255761871182	0.00343818976904362	0.0377041229914264	4930523C07Rik	liver
1165.3470894434	-0.564185007447714	0.180182715265052	-3.1311827364672	0.00174103789876833	0.0234653892894626	Mrps14	liver
1108.12040644773	0.256780533328238	0.246617392813596	1.04121015309866	0.297778024570282	0.576575441224268	Cacybp	liver
2285.48011205292	0.441235672119634	0.140584961542847	3.13856949759989	0.00169774670562259	0.0230057692000177	Rabgap1l	liver
2074.45741034122	0.119030439126406	0.149708552048557	0.795081092547067	0.426566332299065	0.691093484997616	Rc3h1	liver
106762.821658643	0.21942531751133	0.104945753539184	2.09084512818713	0.0365419492398569	0.17972185173977	Serpinc1	liver
202.365418893798	-0.345818827616315	0.2131019483282	-1.6227858559215	0.104635190346119	0.332861252717409	Zbtb37	liver
2204.03802703547	-0.78690148845604	0.235957092385608	-3.33493467180915	0.000853194406486612	0.0139455553125461	Gas5	liver
1068.80320682906	-0.273601978149296	0.17261207868354	-1.58506855508592	0.112950759076109	0.347874457676803	Dars2	liver
267.696217032044	-2.02283791510319	0.681596918305146	-2.96779204949043	0.002999471823835	0.0340263012060542	Cenpl	liver
570.232857038031	-0.0230900898231024	0.18474873431077	-0.124981044710498	0.900538556793455	0.959819158166498	Klhl20	liver
26543.5924643583	0.00365844663660921	0.137696592947572	0.0265688973001835	0.978803580856942	0.992248005200052	Prdx6	liver
997.299685196334	0.14126686624749	0.139865999128073	1.01001578030508	0.312487729723951	0.590943712623185	Suco	liver
744.259222693894	0.120899364683011	0.181015952706024	0.667893425279235	0.504201624518224	0.749095359970342	Pigc	liver
368.170999367538	-0.151548025025425	0.237189224298307	-0.638933010020841	0.522866512511347	0.759855538235263	Mettl13	liver
352.60561740733	-0.0921924198669652	0.224497585514297	-0.410661075288464	0.681321072706783	0.854748313646394	Vamp4	liver
2892.23113677135	0.451495017605388	0.147852490417129	3.053685577643	0.00226048862430431	0.0281427280736558	Prrc2c	liver
461.844494214747	0.754186483783346	0.241582124321309	3.12186377987248	0.00179710069958902	0.0239945853674316	Fmo4	liver
10262.5707487594	0.349572500538255	0.122253150007987	2.85941507859238	0.00424423037861793	0.0436252838361299	Fmo1	liver
305.845591168629	0.541816133650153	0.239675548724552	2.260623315701	0.0237825926935647	0.135787655483428	Fmo2	liver
212.102603125461	-0.115829339807662	0.218532907970342	-0.53003156770962	0.596090043960927	0.805820365840173	Gorab	liver
282.214708510571	-0.182192733448254	0.228317430884425	-0.797979955987157	0.424882121940077	0.689571650702941	Kifap3	liver
1471.44313424826	0.0267016256458059	0.134941259941048	0.197875917695382	0.843142146510928	0.93793940057919	Scyl3	liver
144.651997055721	-0.0302397584816461	0.249030825797219	-0.121429780368916	0.903350630079922	0.960884372691155	Mettl18	liver
92.7652760746712	-0.457508992102551	0.381344021247252	-1.19972771726219	0.230245104741234	0.507298280226565	Sell	liver
85.1390284928771	0.45713078590396	0.366422499984902	1.2475510808501	0.212195502751549	0.486045677475463	Selp	liver
235.048153745801	-0.59637497727708	0.229432408024172	-2.59934933522665	0.00934006692524659	0.0743128340679342	Gm16548	liver
36210.6674949966	0.199031183026656	0.136724196730399	1.45571294464518	0.145471989945374	0.400830975502255	F5	liver
8791.28964303662	-0.115424927374796	0.143898061987806	-0.80212982565795	0.422477863766952	0.688579962216018	Slc19a2	liver
183.417845617939	-0.434523639192538	0.247520168783138	-1.75550801103906	0.079172451587837	0.282960366191824	Ccdc181	liver
574.575529602968	0.269076897811217	0.145892326414492	1.84435264296731	0.0651317641542449	0.252671758392637	Blzf1	liver
326.388494253024	-0.279340530638237	0.222600668107015	-1.2548952930543	0.20951677293156	0.48294439133295	Nme7	liver
2134.19962540984	0.402802532897064	0.162364829508329	2.48084843322797	0.0131070092432436	0.0922089597638715	Atp1b1	liver
90.4111606384115	-0.0278594476625323	0.359778935282266	-0.0774349049665041	0.938277573984692	0.977288286108583	Dpt	liver
4196.13763094106	-0.0161769733242751	0.131231446953493	-0.123270555189475	0.901892856527595	0.960411707889437	Sft2d2	liver
973.116005238353	-0.0443853095644545	0.143881102369973	-0.308486026541018	0.757712531349315	0.898309007940744	Tiprl	liver
2458.07300091073	0.313158591629171	0.179369868474319	1.74588181556261	0.0808314903206962	0.286695976021864	Dcaf6	liver
6011.59186373116	-0.131543044599743	0.165845826973389	-0.793164633686265	0.427681909756373	0.691770166660477	Mpc2	liver
264.288994932352	-0.0587871176456151	0.35864283096173	-0.163915496339276	0.869797667787462	0.94728100158276	Mpzl1	liver
254.905989662699	-0.108503090483986	0.20298319776507	-0.534542226542146	0.592966442673972	0.803671282713822	Rcsd1	liver
18091.568891063	-0.423451957814816	0.125302785462256	-3.37942972498699	0.000726363747131673	0.0123706783701383	Creg1	liver
640.162176552225	0.226044746381428	0.163558204052321	1.38204468367187	0.166957981527117	0.430150853331354	Pou2f1	liver
1950.6133228902	0.00517017189502098	0.304689083557899	0.0169686811048434	0.986461601031429	0.995181855752765	Ildr2	liver
809.012524720171	-0.269602341272382	0.165989740344594	-1.62421087419432	0.10433081086054	0.332476729709217	Tada1	liver
474.77625994723	0.131528824558329	0.231983954129598	0.56697380235553	0.570731980594256	0.791002963888122	Pogk	liver
224.001595300416	0.453812895316203	0.219178821106204	2.07051435456122	0.0384042032179816	0.18435856532814	Uck2	liver
3788.34802808164	-0.309755178470284	0.139508209490912	-2.22033656370927	0.0263959296896244	0.145195717497111	Tmco1	liver
12888.606848555	-0.0732708414286695	0.109245576732317	-0.670698472380296	0.502412636220142	0.747814902951348	Aldh9a1	liver
494.796940654638	-0.950292822876898	0.27912923447995	-3.40449048501638	0.000662876096293772	0.0115909989136324	Mgst3	liver
284.745924519125	-0.0284560964005854	0.184462626501095	-0.154264833697446	0.877400924004768	0.950307055500337	Rxrg	liver
753.501278477172	-0.563765137013842	0.223569446426861	-2.52165555725109	0.0116804018234623	0.0856278086144131	Pbx1	liver
624.21083144352	-0.0334764764140303	0.2382613201524	-0.140503193689255	0.88826242932281	0.95419291261091	Rgs5	liver
100.988112896432	1.43246737469354	0.363978721007483	3.93557999964533	8.29960108566126e-05	0.00234376058827476	Rgs4	liver
5214.93007960123	0.129344557755335	0.278461997700708	0.464496264565175	0.642292235176707	0.83273853154975	Hsd17b7	liver
93.6795006668288	-0.309662577473537	0.38551540064255	-0.803243079154329	0.421834250554788	0.688224978286629	3110045C21Rik	liver
296.054706850299	-0.00211234234700769	0.223127866606884	-0.00946695891970006	0.992446572467583	0.996537408195979	Ddr2	liver
1657.25743750589	-0.0417846271432621	0.203988333825237	-0.204838317759192	0.837698448470914	0.935001487956909	Uap1	liver
814.824183772881	0.562080960116122	0.154955070315811	3.62738023977244	0.000286311502141424	0.00613962098174925	Uhmk1	liver
531.569367376655	0.115929182385181	0.264916052231866	0.43760723975954	0.661671022148918	0.843597542429847	Gm7694	liver
125.992223403511	-0.133673579368151	0.334506230236824	-0.399614617860816	0.689440388120488	0.859122422735598	Nos1ap	liver
5196.07076985004	0.269406305668344	0.14852958640159	1.81382249957885	0.0697050573948411	0.263778496527191	Atf6	liver
712.213573017772	-0.164309416182747	0.162444844498562	-1.01147818319468	0.311787617882803	0.590692238730876	Dusp12	liver
2214.77248487788	-0.569094449512067	0.228059340989527	-2.49537882133142	0.0125822723057584	0.0895119667878611	Fcgr2b	liver
275.860500474892	-0.484480404538565	0.281256583230501	-1.72255667395886	0.0849687256812872	0.295170017310391	Fcgr4	liver
363.549417161743	-0.0497993503735658	0.229834665176452	-0.21667467061739	0.828461888991084	0.931787259214916	Fcgr3	liver
70.4837084691562	-0.640757654174158	0.417679743662842	-1.53408841078821	0.125007904019876	0.367868171565339	Cfap126	liver
7807.99379886553	-0.0916084651992648	0.121107149194478	-0.756424916353672	0.449394473811024	0.708501632450142	Sdhc	liver
228.608842636296	0.78886078303757	0.323754092051969	2.43660482571118	0.0148258716107013	0.100312280920549	Pcp4l1	liver
3728.78897093132	-0.154279212502212	0.214676876205339	-0.718657804367543	0.472351787978656	0.72565709703565	Nr1i3	liver
3006.30417623255	-0.106873359423932	0.180452644746634	-0.592251554827518	0.553682151166322	0.779952725823284	Tomm40l	liver
266520.874448586	-0.145629309163222	0.142932354163078	-1.01886875099718	0.30826528085134	0.587086559126125	Apoa2	liver
422.342846458428	-0.0375815183616266	0.256794127452675	-0.146348823216577	0.883646025375741	0.952630282111885	Fcer1g	liver
11266.0731106096	-0.0113810533632647	0.108205023399856	-0.105180452863151	0.916232621033639	0.967121156136457	Ndufs2	liver
465.977570523058	0.078471225392009	0.188690070452416	0.415873634494179	0.677502473327465	0.853261594862794	B4galt3	liver
978.383874205493	-0.190768165227655	0.136697704956374	-1.39554768156889	0.162850746694695	0.42482511428902	Ppox	liver
646.703566314108	0.0597748974759367	0.154537369407991	0.386798983992838	0.698905029449518	0.864607573892277	Usp21	liver
3207.20756077544	-0.146373006130413	0.133667204133873	-1.0950554930723	0.273492325602589	0.552226367555401	Ufc1	liver
1535.61765647329	0.0426434982466445	0.179578506863375	0.23746437695402	0.81229655197573	0.925547217301385	Dedd	liver
3306.43585851109	0.0781398698117516	0.124365377200503	0.628308871574229	0.529801621076552	0.764121384328052	Nit1	liver
843.758131550615	-0.12935296144021	0.153713632115132	-0.841519126575085	0.400057174598926	0.669890959481796	Pfdn2	liver
345.176052763931	-0.134920230576505	0.185053639926836	-0.729087148082295	0.465948355615861	0.720390530530627	Klhdc9	liver
256.699230912466	-0.286227294971633	0.246046985064044	-1.16330340279167	0.244706425569999	0.522509460349146	Arhgap30	liver
837.689578302274	0.0227293305868818	0.179266879807964	0.126790462416874	0.899106244701705	0.959397562866907	Usf1	liver
511.022174764115	0.546840225519189	0.215325932528161	2.53959297469974	0.0110981542880033	0.082977499120373	Tstd1	liver
3890.400801368	0.252078496690086	0.170140126162739	1.48159345108851	0.138448502621274	0.39078730326934	F11r	liver
110.077865059455	-0.0576657197005573	0.27593195625226	-0.208985289285735	0.83445972251347	0.933297737247773	Alyref2	liver
107.127450255828	-0.268982599714947	0.373034039899515	-0.72106717067269	0.47086818837519	0.724644276084629	Ly9	liver
124.691101831484	-0.100867738941896	0.365116735220226	-0.276261615017609	0.782347135837447	0.911803530723163	Cd48	liver
300.440600292798	-0.387602980919486	0.242494400158046	-1.59839971837233	0.109954047274872	0.341780913756165	Cd84	liver
2498.72377376107	0.198362075829201	0.170071646385309	1.16634418520179	0.243475315321447	0.520990402582179	Ncstn	liver
12174.6365772139	0.140471493382888	0.133750133564151	1.05025310733999	0.29360175850075	0.572781219822766	Copa	liver
6838.47126719689	0.240324474987419	0.134113242928491	1.7919518590387	0.0731406778224297	0.271000508281392	Pex19	liver
7990.96856738469	-0.04283040193167	0.118986604383036	-0.359959864001098	0.718877148332143	0.875203078979799	Dcaf8	liver
978.81277158834	-0.0051699340138694	0.207145076356091	-0.0249580347494336	0.980088436590654	0.992797565862712	Pea15a	liver
363.57160962366	-0.136352853568651	0.291138273627479	-0.468343965462675	0.639538632542036	0.831609212895752	Igsf8	liver
98.7812736029241	0.211006515001948	0.413957238691094	0.509730221578291	0.610240477175764	0.813918809540006	Kcnj10	liver
848.281448997041	0.252744289080952	0.183599405941865	1.37660733587004	0.168633681620411	0.432366408758215	Pigm	liver
535.673576354444	0.258374835123838	0.203430466555806	1.27008918328838	0.204052864176582	0.477054919857134	Tagln2	liver
48.0655591106228	-0.557545880692894	0.499742885184713	-1.11566546962808	0.264565356477616	0.542663606489326	Slamf8	liver
411.806314126699	-0.518942283055272	0.186155175279519	-2.7876865753319	0.00530858759776388	0.0508863018335454	Dusp23	liver
21004.6473412389	-0.317488957085428	0.119592288149238	-2.65476112213219	0.00793645879646527	0.066756810969252	Crp	liver
6822.31296481691	0.49731542594037	0.62384201946634	0.797181674882679	0.42534552715048	0.689864038335099	Apcs	liver
59.5965153161122	0.355181088032612	0.387143563793164	0.917440250207471	0.358911989182042	0.633736350964973	Ackr1	liver
230.967140273654	0.355595175576208	0.220786165838689	1.6105863074592	0.107269920189131	0.337462641180767	Cadm3	liver
74.6635796510165	-0.223579445424586	0.319574886230705	-0.699615192112376	0.484167652362484	0.73412362716419	Aim2	liver
63.9876055410528	-0.683964228170053	0.364182027505581	-1.8780834212352	0.0603697539340552	0.241358637363471	Pyhin1	liver
41.702665908905	-0.374071101299574	0.430263984596027	-0.869399054282427	0.384628900193899	0.65535559807425	Pydc3	liver
312.661009947593	0.255808103441457	0.234612409823746	1.09034344616994	0.275561883816939	0.554164069260745	AI607873	liver
316.051243446776	-0.314902978620931	0.253410049244832	-1.24266176325426	0.213992499749397	0.488394948204373	Ifi204	liver
267.3207666241	-0.424963503779327	0.211086301486919	-2.01322161024107	0.0440913207804624	0.200233517927128	Mndal	liver
411.746082699102	-0.219171011169103	0.194584871722954	-1.12635175195507	0.260016660428424	0.537457117689681	Ifi203	liver
77.2757854175877	-0.0611951333426835	1.22844097557517	-0.0498152817753667	NA	NA	Fmn2	liver
463.068837834052	0.242560768579206	0.365050719999794	0.664457718585909	0.506397401726605	0.750333876434421	Grem2	liver
9650.19873035495	-0.0021612518072128	0.16419257400993	-0.0131629083729578	0.989497821906501	0.996038724586663	Fh1	liver
19423.0941665726	-0.293191066005619	0.135185206511388	-2.16881028310535	0.0300970902247829	0.158938490408558	Kmo	liver
50.1245111802093	-0.227105689515175	0.379294342980565	-0.598758441084399	0.549333979510374	0.777154021884349	Opn3	liver
137.490525610871	-0.346587193383185	0.306740714199811	-1.12990280500363	0.258517181891984	0.536015459869109	Chml	liver
513.361579262505	0.079003109645498	0.191527771789918	0.412489055279954	0.6799810011114	0.854283319801004	Cep170	liver
310.215053955719	-0.306349717539775	0.236457656712966	-1.29557960523837	0.195120359299955	0.466938118635062	Sdccag8	liver
202.441450952942	0.00904321094126338	0.26833679153366	0.0337009729063896	0.973115603147526	0.991674231209393	Akt3	liver
1323.62430685035	0.57207901481466	0.151882019208832	3.76660132512508	0.00016548493951459	0.00399755787622594	Zbtb18	liver
2541.75695840193	0.178046494858753	0.14020636415383	1.26988882375843	0.20412423477633	0.477054919857134	Adss	liver
1993.11543616908	1.0837410432254	0.236265816647349	4.58695658391833	4.4975416412663e-06	0.000248190027268044	Desi2	liver
1136.43932282578	-0.35863460861225	0.209274471919659	-1.71370452077849	0.0865830062229763	0.298536418705189	Cox20	liver
9400.84304638728	0.114510782480822	0.120555974285027	0.949855726022237	0.342185565862088	0.617535607158855	Hnrnpu	liver
127.430723971259	-0.233036793747625	0.283676271970307	-0.821488495068837	0.411368074701837	0.679307884511064	Efcab2	liver
164.075203107362	-0.179743579036914	0.26707481026749	-0.673008356186385	0.500941974803159	0.746757367643371	Smyd3	liver
358.765689395499	-0.225213849604944	0.177419892933835	-1.26938330240642	0.204304388600468	0.477054919857134	Tfb2m	liver
620.667727786247	0.223526651940065	0.185897935800822	1.20241599766637	0.229202394096606	0.505741893063494	Cnst	liver
131.119958831614	0.0758482097033448	0.28405903092083	0.2670156602924	0.789457103547591	0.915125164355128	Sccpdh	liver
3887.89212552834	-0.291431115435094	0.173330760863709	-1.68135831160545	0.0926933378462811	0.311404454627514	Ahctf1	liver
1849.59758130884	0.176645344620147	0.161358861885321	1.094735935518	0.273632340346658	0.552407627852038	Cdc42bpa	liver
24946.7007387194	-0.212519098101457	0.204919299866237	-1.0370867860674	0.29969541287711	0.578334266427917	Adck3	liver
9270.35394018238	-0.230093981470313	0.165848550012056	-1.38737409192656	0.165327720894875	0.427916271129585	Psen2	liver
394.838629105683	-0.294222172112418	0.273050239077422	-1.07753859914766	0.281239716244078	0.559679831384355	Itpkb	liver
2029.50488547232	0.0321310416136896	0.130267758673977	0.246653830086264	0.805176140908583	0.922987036637729	Parp1	liver
179.045112931987	-0.295831310488578	0.269599134495021	-1.09730066842645	0.272509978802207	0.551251899275358	Lin9	liver
1078.00946296978	0.339323867063656	0.157259887760491	2.1577267534392	0.0309490826297019	0.161455968792417	Acbd3	liver
446.717138851132	-0.244447290968312	0.212564914223587	-1.14998889568007	0.250148444867928	0.528686892438715	H3f3a	liver
557.439682170871	-0.134410946290674	0.161732315652699	-0.831070437273065	0.405933839125919	0.674593740113939	Sde2	liver
188.552540543912	-0.659347847536555	0.231407905772624	-2.84928833928611	0.00438171499205474	0.0445579301389844	Pycr2	liver
1039.38658729888	-0.194108543241723	0.155990160819925	-1.24436401771393	0.213365619606226	0.487611778849334	Tmem63a	liver
18843.1658500103	-0.130532043163388	0.124094047569515	-1.05187997103783	0.292854622259852	0.572293876833336	Ephx1	liver
1181.65084916405	-0.841060498306307	0.226617199579747	-3.7113709809583	0.000206139729574449	0.00475069146892839	9130409I23Rik	liver
831.889933121902	-0.0427040080990632	0.141355129280504	-0.302104411183564	0.762572469829533	0.900534682639568	Nvl	liver
575.949234829666	-0.0332505567429672	0.153414617262188	-0.216736562241272	0.828413652643375	0.931787259214916	Cnih4	liver
7363.74801112606	0.207787300114955	0.118176040354599	1.75828619313583	0.0786988257323816	0.281600488160525	Wdr26	liver
791.711195989652	0.18245887574119	0.175519410683314	1.03953673859124	0.298555180985588	0.577152310341736	Lbr	liver
1458.56804546969	-0.467362593454518	0.208671573923382	-2.23970416606011	0.0251101349330696	0.140565343529468	Srp9	liver
4699.04460500603	0.0354349560592066	0.141302132855938	0.25077438919718	0.801988543434317	0.921573112887003	Degs1	liver
688.076161050455	0.543087837861283	0.180841819353341	3.00310978845088	0.00267236006479166	0.0313033024142586	Fbxo28	liver
897.910429879595	0.253677511671093	0.173982416027469	1.45806408178078	0.144822880581723	0.399866709524472	Trp53bp2	liver
2647.82995381489	0.0155409031186882	0.135513774143504	0.114681354105236	0.908697693674237	0.964073838513191	Capn2	liver
467.614203979508	-0.108695451145659	0.313265614850771	-0.346975365290051	0.728609826063844	0.881952970010883	Capn8	liver
1205.67212515471	-0.603561746728621	0.322620846541311	-1.87080826672909	0.0613716613812245	0.244147184661419	Susd4	liver
648.68699455885	0.354502812263692	0.233597575950393	1.51757915646768	0.129120524675054	0.3753793890384	Tlr5	liver
88.4544950155022	-0.741853884985952	0.322336789210735	-2.30148686038114	0.0213641272454385	0.127232896417141	Disp1	liver
935.874991782289	-0.0315375556498944	0.137802327655287	-0.228860834112945	0.81897708252012	0.927449336601435	Brox	liver
326.785964615247	0.101172415015636	0.176393471368174	0.573560995375312	0.566264912497691	0.788901783132278	Aida	liver
13116.6064319232	0.68084032976178	0.136499491232959	4.98785983458218	6.10518356150221e-07	4.89635721632477e-05	Mia3	liver
242.674969154219	0.109275767699458	0.226676155135201	0.482078794896975	0.629749972908263	0.825800324186441	Taf1a	liver
161.127438501087	0.0538061840817192	0.264285044743362	0.203591482575068	0.83867274966459	0.935548324121956	Dusp10	liver
100.038086536934	-0.0614950854888744	0.289603756721106	-0.21234215393171	0.831840111092628	0.932956178973817	Hlx	liver
19472.1728583666	-0.0519098920879589	0.116754175333693	-0.444608442820963	0.65660274504182	0.841293056950579	Marc1	liver
16231.0819178796	-0.164527991914361	0.120069742301864	-1.37027021762674	0.170602566286487	0.435096220569523	Marc2	liver
11087.2985150298	-0.316962593419638	0.132912734931834	-2.3847420909832	0.0170910986221219	0.110838768961793	C130074G19Rik	liver
42.4074400323118	0.500998491696405	0.429923851985374	1.16531913589537	0.243889836027225	0.521506350410152	Mark1	liver
1499.55489656186	0.120029587113856	0.137319775214111	0.874088141541918	0.382070254925191	0.653366927088659	Rab3gap2	liver
4365.84498441261	0.344951925740387	0.125880508784156	2.74031245243746	0.00613808017699723	0.0560251172452782	Iars2	liver
3226.03266407617	0.0379125226849526	0.168801618090353	0.224598099910745	0.822291943179707	0.928964715862088	Bpnt1	liver
8194.64499941068	0.0914414121415046	0.195816784876923	0.466974331127837	0.640518243117889	0.832258619665516	Eprs	liver
101.782862082488	0.289780279356293	0.405150621609996	0.715240860805689	0.474460224513989	0.727102738968572	Gm2061	liver
4542.98542705005	0.619518633133724	0.190282925987333	3.25577626010946	0.00113082824777212	0.017396245295011	Slc30a10	liver
721.287524825313	-0.515964524517688	0.219808592288524	-2.34733555747641	0.018908217506217	0.117198081024627	Lyplal1	liver
379.980333441389	-0.450878464650392	0.22548776050135	-1.99956957152756	0.0455467624048174	0.204397078872984	Rrp15	liver
749.523387402029	0.468273844104298	0.188299220044494	2.48686024293488	0.0128876016088466	0.0911451189620365	Gpatch2	liver
124.781653179336	-1.20727138733886	0.543233156210727	-2.22238163031151	0.0262575257026591	0.144765368562323	Esrrg	liver
681.460660811858	0.41656196318713	0.17436441149855	2.3890308785322	0.0168928824821904	0.109968277197376	Kctd3	liver
101.449990047657	0.208092543552346	0.321831866122036	0.646587754220208	0.517898785605142	0.756933834385841	Ptpn14	liver
857.291182948535	-0.233422642859143	0.182294583076175	-1.28046944083689	0.2003800855783	0.472716814712201	Smyd2	liver
3881.34061260566	0.993040402777129	0.217601186491445	4.56357990867927	5.02886563680066e-06	0.000273743229007747	Prox1	liver
594.871398109027	0.228422272445373	0.154064147948878	1.48264392129159	0.138169041283182	0.390273201840028	Rps6kc1	liver
1115.65937058293	0.164919082536014	0.133862619542445	1.23200250450591	0.217948148563617	0.493305028639757	Angel2	liver
202.584257391282	0.627239640413772	0.235452837645245	2.66397146318885	0.0077224113440969	0.065417028675318	Mfsd7b	liver
250.049513655732	-0.00674391929731549	0.215375461733181	-0.031312384628432	0.97502041374654	0.991936426728784	Tatdn3	liver
59.9434458121077	0.505146383250407	0.436720539709798	1.15668107478086	0.247402684560618	0.525200770946428	Atf3	liver
245.552121657587	-0.665086793313739	0.264611478931998	-2.51344649143002	0.0119557913253918	0.0868764064736669	Nenf	liver
105.689373954798	-0.123382260428599	0.266794115072527	-0.462462451224075	0.643749723282437	0.833528056300476	Tmem206	liver
4938.91374412184	0.0624732810500547	0.135382645112616	0.461457087044557	0.644470702507358	0.83387564262865	Ppp2r5a	liver
1360.60567673041	0.297335871709445	0.144131346881201	2.06295076083984	0.0391173066165045	0.185926984826768	Ints7	liver
11989.4607717819	0.468484907599381	0.138922533183904	3.37227443858373	0.000745501230766996	0.0126376364876192	Lpgat1	liver
184.411140608824	-0.390216487884957	0.3098079652718	-1.25954310936652	0.207834229477937	0.481186639842105	Nek2	liver
2857.54637303428	0.220037039774255	0.179589948177009	1.22521912839676	0.220492669217875	0.496541896422882	Slc30a1	liver
104.7795139161	-0.808120611958675	0.306699159029104	-2.63489673240998	0.00841628843962419	0.06934425410248	Rd3	liver
159.774920899038	-0.267265400440149	0.250593328216198	-1.06653039146184	0.286183947871309	0.565133436128012	Traf5	liver
450.253311637601	0.00862597951212984	0.217219672895501	0.0397108576637973	0.968323645342151	0.990134590179862	Rcor3	liver
78.2337682290753	0.00102313401334813	0.332472783416494	0.00307734667131064	0.997544636478131	0.998696034369571	Gm10516	liver
44.5810845047368	-0.104102068284618	0.48519026779898	-0.214559267144553	0.830110954373515	0.932255825502631	Hhat	liver
445.147829063899	0.00655894211245177	0.16598175715953	0.0395160421524382	0.968478963718032	0.990209241333327	Diexf	liver
4603.26981487292	0.288526062252623	0.161010486055786	1.79197063073679	0.0731376706615324	0.271000508281392	Irf6	liver
414.121645002368	-0.233230069051008	0.177137098505069	-1.31666416024272	0.187951222052576	0.456686164672285	A130010J15Rik	liver
36.4374608398673	-0.647507932611545	0.550242900516636	-1.17676744580182	0.239288339450349	0.516811260967272	Traf3ip3	liver
29597.6914446988	-0.277122054057846	0.178118643472853	-1.5558284559925	0.119748889587651	0.358085792130114	Hsd11b1	liver
1725.25337765256	-1.82517834010318	0.314684953983506	-5.80001781781674	6.63078736268078e-09	1.00372183031293e-06	G0s2	liver
177.517004269362	-0.278983203852859	0.232961668871434	-1.19754981669033	0.231092322654506	0.508141224919339	Lamb3	liver
2493.4309402296	0.365610057966416	0.18226464110879	2.00592970607058	0.0448637483242507	0.20277095850161	Plxna2	liver
67.062347239547	-0.0959905343190397	0.395788003575805	-0.242530176386851	0.80836937730815	0.924299749545312	Cd34	liver
274.75432620478	0.628551835136373	0.242945884558058	2.58720923089424	0.00967568194982965	0.0760277294947425	A330023F24Rik	liver
1668.73618602769	0.0207709833576871	0.140204087031036	0.148148201650421	0.882225809700713	0.951928465021608	Cr1l	liver
4547.50117782655	0.107399062750217	0.137299717943204	0.782223476924002	0.434083249607794	0.69694406550996	Iyd	liver
302.64999003833	-0.194020438298489	0.32993159796228	-0.588062615089903	0.556490265308885	0.781346626011424	Plekhg1	liver
206.914098582873	-0.481758240306345	0.426880156787411	-1.12855618291544	0.259085103628865	0.536520757617187	Akap12	liver
227.902005864905	0.126945506291314	0.234046542424395	0.54239428182248	0.587546918019034	0.800837233601743	Zbtb2	liver
685.396448352264	0.424198303068074	0.204425308416665	2.07507723164816	0.0379793775249565	0.183196436096723	Armt1	liver
1091.3958092585	-0.064766888037654	0.220006962429062	-0.294385629084521	0.768463246974475	0.903941807089365	Esr1	liver
2558.67375465831	-0.0675680285661596	0.205242961256484	-0.329209967311487	0.741996989647372	0.888889044558642	Syne1	liver
188.749796496594	-0.43096914579889	0.296820336532033	-1.45195289121431	0.146514704430217	0.401954821960208	Myct1	liver
50.4257683846639	-0.209928133714769	0.384114367408352	-0.546525075672565	0.584705055708921	0.79940640727404	Fbxo5	liver
211.15880182425	0.110357150290648	0.209731504922907	0.526182989681083	0.598761071622302	0.807898776466599	Mtrf1l	liver
480.329163554554	-0.106249896913724	0.234492732932093	-0.453105286399188	0.650472928916793	0.837187261674229	Cnksr3	liver
58.3742766450041	-0.454720952876347	0.366304406428722	-1.2413745095497	0.214467431198553	0.488746392658012	Lrp11	liver
1542.90716205246	-0.00759971321945552	0.13501002458924	-0.0562899921141202	0.955110791331143	0.983731405797401	Pcmt1	liver
45.030748773173	-0.0497332943158015	0.413539752631352	-0.120262427008163	0.904275266944504	0.961297267786313	A630066F11Rik	liver
188.037474506895	-0.0503669710416172	0.207961883386339	-0.242193281871988	0.808630400407877	0.924299749545312	Nup43	liver
80.5192153515422	-0.0887953041633887	0.327949220881079	-0.270759308178347	0.786576158526442	0.91363437163977	BC020402	liver
2007.18864414762	0.298209313839258	0.141324042703972	2.11011026951662	0.0348488589334909	0.174607152423946	Lats1	liver
780.279036302446	-0.0919099312129461	0.181398403649717	-0.506674421404643	0.61238328072192	0.815020562792864	Katna1	liver
1820.15139152604	0.17395621800694	0.148840401472225	1.16874327323957	0.242507081591691	0.519380486300168	Ginm1	liver
840.00775946165	0.10120293181216	0.137515495319773	0.735938386992871	0.461768194616207	0.717431406590853	Ppil4	liver
278.672760662214	-0.0821677632902425	0.309904150268358	-0.265139280061562	0.790902168705757	0.915917702111114	Zc3h12d	liver
5535.91232375942	0.110186118883921	0.210061115062191	0.524543149508175	0.599900816185958	0.808787046813525	Tab2	liver
41.7434019117776	0.0154140966922219	0.538752999861299	0.0286106930192319	0.977175083780514	0.992245730374269	Ust	liver
2578.48741139339	-0.165573945285346	0.200071605604522	-0.827573431947325	0.407912119627146	0.676479569770411	Sash1	liver
998.481241973379	0.581127019641279	0.133871089171119	4.34094488391335	1.41871310013238e-05	0.000584656783067253	Stxbp5	liver
116.366334010348	-0.620206075700308	0.427608816798386	-1.4504052567109	0.146945542074068	0.402233566131428	Adgb	liver
2116.93153912655	0.190457865825075	0.147934214998827	1.28744973450925	0.197937578893163	0.469940610634449	Rab32	liver
1348.16059051421	-0.127830295562129	0.131765388007641	-0.970135613722145	0.331978899193901	0.608573937843191	Shprh	liver
705.131080915102	0.239625720769378	0.165700789291579	1.4461350594276	0.148139323913426	0.40383323514129	Fbxo30	liver
101.393723779326	-0.721462801502636	0.329392137497728	-2.19028543602567	0.028503542402897	0.153079292458416	Epm2a	liver
2480.72094669064	0.34873464643837	0.123560873339048	2.82237116826983	0.00476699706068632	0.0470057169180791	Utrn	liver
596.728809379392	-0.964832802943644	0.175067742355519	-5.5111969227564	3.56401702901413e-08	4.24506186723169e-06	Sf3b5	liver
693.489554361425	-0.0757850204639817	0.200970436948965	-0.377095365937961	0.706102734883099	0.868425153486619	Ltv1	liver
386.892328869139	-0.213238621724079	0.228880133424713	-0.93166068427787	0.351511910818296	0.627651586833951	Phactr2	liver
471.702654183379	-0.673514634940998	0.190418703795473	-3.53701932381819	0.000404670056874845	0.00802006718979307	Fuca2	liver
1400.62926866431	-0.277110680675721	0.131297237837346	-2.11055986584434	0.0348101603979441	0.174485928994695	Pex3	liver
138.243235110547	0.0341086499083871	0.260417114629305	0.130976990344662	0.895793509625199	0.957391250958701	Adat2	liver
356.450491611769	-0.314720310353783	0.250976581176779	-1.25398277750905	0.209848265417274	0.483615830070845	Aig1	liver
534.353960694926	0.246952111091924	0.175501279711255	1.40712427566468	0.159390540864624	0.420036847010169	Hivep2	liver
67.5415176506138	0.789833025201304	0.440284263703523	1.7939160908398	0.0728265627501269	0.270485813486887	Adgrg6	liver
819.375514431409	0.0714263162557159	0.158880281934057	0.449560608693791	0.653027296715894	0.839292265296562	Vta1	liver
855.096793562125	-0.297210162838914	0.239866284911933	-1.23906601942009	0.215321049876299	0.489754628476437	Cited2	liver
2003.99357117439	0.16514238427835	0.180014563321029	0.917383467380043	0.35894173297095	0.633736350964973	Heca	liver
311.489657039447	-0.31867370801006	0.252125613827534	-1.26394816921714	0.20624863097071	0.479333777434954	Abracl	liver
947.645981215523	0.0565401650756449	0.174262359884975	0.324454260305928	0.745594145750989	0.890803215153878	Reps1	liver
519.943540645488	-0.0198887072579936	0.17983252464644	-0.110595718416876	0.911936942866631	0.965297089545584	Ccdc28a	liver
684.497612159468	0.00512711824707946	0.185621882440596	0.0276213029394327	0.977964190857718	0.992245730374269	Nhsl1	liver
4027.29669763888	-0.118356520793841	0.134935732874814	-0.877132530221969	0.380414657465987	0.651840240475936	Perp	liver
181.551112762213	0.589200954599588	0.262993234873962	2.24036544089037	0.0250672079633532	0.140455757708029	Tnfaip3	liver
1086.84925615235	0.103590183762739	0.158103623680337	0.655204361237055	0.51233618677201	0.753841038021928	Ifngr1	liver
3527.81183738286	-0.0179497114678743	0.12980524068822	-0.138281870382936	0.890017653190966	0.95512153147969	Pex7	liver
1971.20197818976	0.519401878167846	0.206967806213119	2.50957812072959	0.0120875475740839	0.0874928985055533	Map3k5	liver
1706.38762245613	0.160427410889802	0.163281580969163	0.982519950735288	0.325843759123554	0.603084353068428	Map7	liver
3437.77513551612	-0.00514238096000796	0.140241915222426	-0.0366679316369293	0.970749778285736	0.990906913122636	Bclaf1	liver
275.302040428197	-0.130218681309207	0.206173595330202	-0.631597276560331	0.527650066631948	0.7629363343248	Pde7b	liver
70.6309423551154	0.181151753221365	0.35283922231727	0.513411610057555	0.607663425936796	0.812359096082368	Ahi1	liver
2781.22091055238	0.153343797948645	0.161614373447453	0.948825247888624	0.342709498511186	0.618017578637321	Hbs1l	liver
18699.8191008874	-0.150616550992653	0.122608062126388	-1.22843921011811	0.219282136290071	0.494834758876299	Aldh8a1	liver
1129.18765057824	0.841251708571154	0.250890278754115	3.35306617995997	0.000799215940982482	0.0133216705049537	Sgk1	liver
54.6357366717004	-1.38872863482369	0.420318974298543	-3.30398749459573	0.000953200840834761	0.0153097544929802	E030030I06Rik	liver
56.2939911692261	-1.32474275263029	0.454589148689975	-2.91415392656843	0.00356654003665482	0.0387204448037621	Raet1d	liver
455.013052232182	0.385349938829082	0.157745926136244	2.44285192186997	0.0145717147974796	0.0992064114395472	Tbpl1	liver
118.390776231254	-0.613295117829587	0.3191168054135	-1.92185152090283	0.0546244433585442	0.228309194926474	Tcf21	liver
5372.92667356199	-0.369171577396643	0.156158283455344	-2.36408578032439	0.0180746269902346	0.114682364289305	Rps12	liver
219.272653953878	0.567654591748198	0.282009426380296	2.01289226049736	0.0441259649618264	0.200315229619159	Slc18b1	liver
3260.97425453171	0.335603093381076	0.141582890886048	2.37036474732801	0.017770544430913	0.113396337683206	Vnn3	liver
1667.20744935957	-0.297550804649173	0.547165698625123	-0.543803833823715	0.586576470331127	0.800456172377361	Vnn1	liver
946.993579452222	-0.0570761818960317	0.18764366361576	-0.304173244095826	0.76099590779498	0.899379189583811	Stx7	liver
879.612961730932	1.58042474087292	1.13324507478639	1.39460102323481	0.163136186366253	0.425020313316731	Moxd1	liver
192.366157731454	1.63493023190061	0.295318504186761	5.53615912556117	3.09176690006381e-08	3.71939558077676e-06	Ctgf	liver
1646.59213458174	0.027533064479919	0.185126931735104	0.148725332515723	0.881770371087083	0.951799522723956	Enpp1	liver
5035.14427823172	-0.362225657797874	0.150484259687416	-2.40706674937489	0.0160812303366117	0.106412101732365	Enpp3	liver
772.631140446818	0.0690701064079801	0.144865125061851	0.476789057259229	0.633512338677425	0.827775784630569	Med23	liver
57335.359893997	0.179042061182275	0.190098525972437	0.941838240283015	0.346275463659089	0.622302633375984	Arg1	liver
294.319759159892	-0.496210701189027	0.244829260008906	-2.02676224717167	0.0426867331045799	0.195925753242311	Akap7	liver
775.081702109905	-0.183125731452517	0.195883607868026	-0.934870117237662	0.349855238916695	0.625930773969042	Epb4.1l2	liver
1229.41129951012	-0.018800594591685	0.208986014038438	-0.0899610181006041	0.928318192227031	0.97247868642299	Smlr1	liver
257.357141104438	0.805505002249574	0.243781717397238	3.30420595461232	0.000952458328583415	0.0153097544929802	L3mbtl3	liver
861.514241771377	-0.234585627750536	0.187358477133843	-1.25206839497823	0.210544942903003	0.484324944608023	Arhgap18	liver
55.8467324495714	1.08042401312935	0.425681062821325	2.53810683042492	0.0111453956604988	0.0831756264241937	Lama2	liver
4311.42215765885	0.451309361280653	0.176938634084189	2.55065471493306	0.0107520789507226	0.0815044169988615	Ptprk	liver
1631.88199424966	0.114350173172012	0.165002358832553	0.693021445154347	0.48829609348295	0.737501821042045	Echdc1	liver
1103.28720582983	0.119029437072256	0.144501524754725	0.823724436640342	0.410096151222555	0.678305769547716	Rnf146	liver
202.433421704027	-0.0823709481220532	0.268916440086589	-0.306306851658196	0.759371022914919	0.898694875127052	Rspo3	liver
38.4368695323669	-1.17342178158554	0.493953569612118	-2.37557101269049	0.017521820479057	0.112380217648951	Cenpw	liver
357.124620825581	-0.276782843562509	0.203482143273456	-1.36023161103894	0.173756642220798	0.43841561242651	Trmt11	liver
1274.60258265286	0.124518582146117	0.207945124006197	0.598805010414222	0.549302920745973	0.777154021884349	Gm20300	liver
1049.65439918162	-0.215450710990962	0.172628988467076	-1.24805638325369	0.212010409706385	0.486006491761081	Hint3	liver
83.789464810818	-0.00159464789735416	0.35065393324214	-0.00454764012657742	0.996371520661703	0.998280119393711	Ncoa7	liver
33.1502119463324	-0.417966724764146	0.458692683381385	-0.91121297528224	0.362183168705458	0.636904475884616	Hddc2	liver
269.427866977005	-0.796652836796174	0.211543851264724	-3.76589927825059	0.000165950687043662	0.00400077508043136	Tpd52l1	liver
925.954864499792	0.336894495021647	0.165816803477668	2.03172711061831	0.0421812897676298	0.194869783373497	Rnf217	liver
254.161906388709	-0.177543939094049	0.207662579035596	-0.854963565985644	0.392571318115569	0.663550224772847	Zufsp	liver
468.072573000323	-0.259058472373759	0.183430889544946	-1.41229469592842	0.15786320751804	0.418118535103924	Rwdd1	liver
66.5115918425495	-1.19327280926746	0.421604913157371	-2.83031049218834	0.00465028508443008	0.0462647387083948	Fam26f	liver
529.568931616887	-0.261887483165807	0.230939750872865	-1.13400781881842	0.25679126828235	0.535440674985626	Dse	liver
1486.59772772523	0.16358165087672	0.159133032608514	1.02795534148557	0.303970835296911	0.583024896137764	Tspyl1	liver
156.665370648591	-1.20065265735113	0.395224115950714	-3.0379033285025	0.00238230365284882	0.0288902348223501	Tspyl4	liver
1095.01566882862	-0.0194470966130612	0.165245116259665	-0.117686362255343	0.906316173025026	0.962395936224827	Nt5dc1	liver
231.306191892169	-0.10632069288076	0.226566886166722	-0.469268456126122	0.638877759375881	0.831392548022609	Frk	liver
1065.61431434957	0.13090588084682	0.156913219254948	0.834256549374137	0.404136431053358	0.673185792570851	Hdac2	liver
763.664484178762	0.0382446902184883	0.252449100473143	0.151494658316506	0.879585524253595	0.951252086739532	Marcks	liver
340.610841103811	0.297340957047561	0.33448456916174	0.888952688588099	0.374028507035773	0.647392572435954	Lama4	liver
74.5111528260823	-0.812414350096605	0.406966501895668	-1.99626835700811	0.0459047203929316	0.20507152692519	Tube1	liver
401.134931663147	-0.166511615200356	0.240211798775623	-0.693186662974414	0.488192416849986	0.737501821042045	Fyn	liver
201.843743042996	0.376455305210856	0.220936957912535	1.70390372334124	0.0883990753073708	0.302113885212407	Traf3ip2	liver
39.2249825797015	-0.450293771893112	0.452030401042657	-0.996158158509826	0.319173305618294	0.597704680353063	E130307A14Rik	liver
1882.53902093402	0.603443822000171	0.15386688352944	3.9218564005341	8.78693568535422e-05	0.00245829851848398	Rev3l	liver
33.3595190062716	-0.572056165814889	0.46755826504537	-1.22349706674393	0.22114201139865	0.497352476561181	AA474331	liver
766.490912005795	0.320672596688988	0.145622925680581	2.20207494932751	0.0276600146686655	0.149887376785606	G630090E17Rik	liver
2452.0346929597	-0.241704787639297	0.144665195213763	-1.6707874156057	0.0947636750894646	0.314956400129523	AI317395	liver
5211.75082999512	-0.145400309046548	0.123883275819845	-1.17368795815501	0.240520035297014	0.518447594449575	Slc16a10	liver
314.882455454965	-0.00222897733213652	0.202281516978874	-0.0110191843794078	0.991208140832866	0.996477547814798	Rpf2	liver
592.991924070994	-0.148471121444262	0.203402214484673	-0.729938569353429	0.465427735222548	0.719718901633713	Gtf3c6	liver
638.235094389477	-0.0342595174017454	0.192684439728436	-0.177801162616088	0.858879134262821	0.943373668924314	Cdk19	liver
1066.00884933965	0.226587761125445	0.180485059692967	1.25543777147486	0.209319884850785	0.482583023141998	Ddo	liver
1721.12726532551	-0.305426800094111	0.146238497849817	-2.08855263548846	0.0367480126001006	0.180366622431338	Cdc40	liver
39.5323537584651	0.0962839207006471	0.514878195576402	0.187003298115699	0.851658047041304	0.941027573950341	Wasf1	liver
994.207090635681	0.0912018360884961	0.16836965412229	0.541676209789292	0.588041581362574	0.801094787058665	Fig4	liver
644.597419979126	0.0638726100835443	0.165828689839287	0.385172253036834	0.700109799304785	0.865518882450293	Zbtb24	liver
67.7818319528769	0.271850282413864	0.447288451957646	0.607773979462375	0.543337389307966	0.772694120717716	Mical1	liver
1109.49414057002	-0.217316116011785	0.169032634448692	-1.2856459151842	0.198566664675662	0.470454568610686	Smpd2	liver
19804.5299474441	0.207321293594037	0.175001693899859	1.18468163921129	0.236143344656387	0.513243800581091	Cd164	liver
290.543278154118	-0.731092048710404	0.231126550380534	-3.16316774298198	0.00156062380904302	0.0219008679567289	Ccdc162	liver
231.208316521606	-0.292150286078728	0.219473735365855	-1.33114008194066	0.183142922477404	0.450118114234163	Cep57l1	liver
1041.56203505274	-0.0829169937552484	0.176602172657217	-0.469512874658622	0.638703084411588	0.831392548022609	Sesn1	liver
698.035786491211	0.285048373854912	0.234439980625683	1.21586929453826	0.224034716609181	0.500054245834222	Foxo3	liver
659.186170581853	0.273956046087838	0.159198966546643	1.72084060613279	0.0852797517061025	0.295908685614195	Lace1	liver
2546.52962785069	0.123302836776119	0.133230812375426	0.925482886261088	0.354714781667873	0.630521933950771	Snx3	liver
989.960521178955	0.469143612004887	0.185653162385262	2.52698960781144	0.0115044906890616	0.0846995244733239	Ostm1	liver
9903.75941663692	-0.0452417420359168	0.125547195301814	-0.360356453421011	0.718580587243195	0.875164137176991	Sec63	liver
563.171987885751	-0.0388155168371765	0.154990941920755	-0.250437324634252	0.802249168146587	0.921685661538032	Pdss2	liver
388.29545326955	0.523038893460085	0.209103058664028	2.50134501523705	0.0123722581890971	0.0886998009623589	Bend3	liver
724.996751758663	-0.00969324754554073	0.168348747186288	-0.0575783764806669	0.954084474160517	0.983432873858592	1700021F05Rik	liver
85.3464833830105	-0.589396281175005	0.377823852761849	-1.5599763669408	0.118765466129234	0.356725308067742	Cd24a	liver
243.210935362316	-0.26400428953415	0.290313461098136	-0.909376673529125	0.363151330484898	0.63765160142763	Qrsl1	liver
1191.75257142488	-0.223155168376599	0.190255725027316	-1.17292222530786	0.24082699595295	0.518766102623819	Rtn4ip1	liver
1395.51484626123	-0.151110553688716	0.131664061173277	-1.14769780259054	0.251093338640518	0.529562534717833	Aim1	liver
2676.79190612646	-0.619136105620978	0.180246466258783	-3.43494171326539	0.000592681291694985	0.0107056395481842	Atg5	liver
1751.55941496679	0.0322438767432028	0.149509579902873	0.215664285620692	0.829249442020382	0.932169504496729	Prep	liver
225.045004291113	0.354754177874262	0.220241023593421	1.6107543094658	0.107233283317631	0.337435626029585	Hace1	liver
2416.05762731682	0.0565004911486347	0.1375738225779	0.410692165776246	0.681298272196483	0.854748313646394	Ascc3	liver
112.30398688842	-0.186165809614618	0.345997649837934	-0.538055127547307	0.59053899020957	0.802778011203563	Lilr4b	liver
219.154572520333	-0.137495607792516	0.286869851106987	-0.479296124224771	0.631727979018678	0.826637706682518	Lilrb4a	liver
197.408760289862	1.00410604218161	0.265671237296112	3.77950602557118	0.000157139790885227	0.00385768826857896	Dcbld1	liver
1579.1725924335	0.192648364494154	0.184483157084012	1.04425990718721	0.296365156868078	0.575421151590678	Gopc	liver
3001.6311254191	0.319996635856975	0.162495932075081	1.96925936403824	0.0489233150004627	0.213558889918372	Nus1	liver
630.199463029299	0.147540326903107	0.187094152828902	0.788588658022002	0.430352462102053	0.693871090302162	Cep85l	liver
222.393130229831	0.39185705915986	0.226819274494362	1.72761799028504	0.08405673526949	0.292762746176017	Mcm9	liver
435.995457514788	0.0473417565173088	0.177000431160908	0.267466899412641	0.789109696518253	0.914898771117443	Asf1a	liver
10018.899641095	0.117124128213194	0.118129833258092	0.991486443202709	0.321448108858877	0.599450759917192	Man1a	liver
541.408073567091	-0.381242119689924	0.176867601637075	-2.155522640445	0.0311209588866271	0.161972474608114	Tbc1d32	liver
41.0120593566031	-0.285483583621103	0.401241524686474	-0.711500595169398	0.476774082136089	0.728699302261104	Msl3l2	liver
192.99017872552	-0.399391827839453	0.24495553852474	-1.63046661547159	0.103002915456172	0.330169217409472	Gja1	liver
1293.62799731497	0.13880100416095	0.167750826873808	0.827423666086391	0.407996971313857	0.676521828441955	Hsf2	liver
12154.5635989942	-0.0117998957354226	0.124202751155878	-0.095005107581018	0.924310770010796	0.970877373895912	Serinc1	liver
49.7133810564969	-0.415574586455096	0.385111077242056	-1.07910317571544	0.280541735721003	0.559270375121577	Pkib	liver
198.077593772265	-0.457939764064079	0.264395092984265	-1.73202822675431	0.0832685368522253	0.291146317991012	Fabp7	liver
2156.55542541955	-0.32532642771913	0.137920602831989	-2.3587949953745	0.0183343811202747	0.115651376038929	Smpdl3a	liver
1837.40353049132	0.205465242570512	0.129906944394701	1.58163401908861	0.113733143220823	0.349478853881608	Gcc2	liver
893.153857066015	-0.206473989147907	0.18080958347059	-1.14194162269884	0.253478285947011	0.532611490450857	Lims1	liver
6819.53321325628	0.17937860090521	0.129913204991003	1.38075725956905	0.16735360901027	0.430921214981496	Ranbp2	liver
130.130495763735	0.235291615463695	0.277177550453585	0.84888410002417	0.395945787097517	0.665162382178904	Ccdc138	liver
1009.07405711323	0.107120580822924	0.150170281964009	0.713327426851318	0.475643169598333	0.728176380819592	Sept10	liver
341.57600985263	-0.287162243665855	0.204450878473436	-1.40455372855326	0.160154024205727	0.420841019120616	Sowahc	liver
445.080504509471	0.192938035610043	0.162912448454887	1.18430505120958	0.236292330033885	0.51347484290239	P4ha1	liver
2772.14429135133	-0.179555516415423	0.150243729317701	-1.19509491165345	0.232049949812275	0.508759047975518	Pla2g12b	liver
1592.96973345138	-0.251956870674917	0.293955813298803	-0.857124980273161	0.391375816969296	0.662667287563776	Oit3	liver
1103.6289543688	-0.181590360069285	0.202420182068815	-0.897096120620773	0.369667628609531	0.643907333006797	Mcu	liver
1606.75150398005	0.0901971013818574	0.129827659305527	0.694744878436064	0.48721519777419	0.736770362491532	Micu1	liver
1883.17175878661	0.172198479377532	0.127723651660893	1.34821136992481	0.177590408694115	0.442869139695704	Dnajb12	liver
408.311808816736	1.90974134543168	0.623387336094678	3.06349076225321	0.00218770959271704	0.027674181283266	Ddit4	liver
1099.64941750389	-0.193696394265985	0.159188574048972	-1.21677322272136	0.223690510760636	0.500054245834222	Anapc16	liver
639.190151414674	0.0473962861024904	0.163112103573897	0.290574917887794	0.771376445351903	0.905244233497551	Ascc1	liver
22877.3935255629	0.0176640376838682	0.133532748968737	0.132282438729721	0.894760897166718	0.95679765270361	Psap	liver
404.786813798593	-0.137446511379737	0.240654222714889	-0.571136919307561	0.567906834103924	0.789512141038615	4632428N05Rik	liver
362.197366773448	0.876640367742993	0.24098381298398	3.63775623303491	0.000275023533518236	0.00597814546277364	Slc29a3	liver
147.557125072076	1.07818602153572	0.304946631576195	3.53565479953932	0.000406765847284965	0.0080362949326026	Unc5b	liver
12212.0798318623	0.084049897723002	0.150880980157931	0.557060920700707	0.577485806718443	0.795870575647023	Pcbd1	liver
6004.47823722133	0.436578759658594	0.133368970873608	3.27346576043039	0.00106237260858067	0.0166410709390957	Sgpl1	liver
42.461165812083	0.273040277072173	0.396094492567532	0.689331162628122	0.49061489167309	0.738974416035778	Adamts14	liver
904.903779521158	0.0980324837797406	0.171652137184673	0.571111349894068	0.56792416540384	0.789512141038615	Pald1	liver
4974.21355623448	0.293557181441745	0.16178657072346	1.81447186950714	0.0696051097761459	0.263540109231036	Eif4ebp2	liver
364.568096449964	0.118265428517363	0.194567549156992	0.607837375912757	0.543295337488754	0.772694120717716	Lrrc20	liver
7147.77368973327	-0.149649063292405	0.182973487240098	-0.817872936399988	0.413429745283862	0.680771206175455	Ppa1	liver
4614.71487976684	0.0498593084554687	0.136322839618217	0.36574435065396	0.714555848561106	0.873297764645542	Sar1a	liver
1363.05318621684	-0.0113339250317589	0.168747699167077	-0.0671649159526446	0.94645041504418	0.980098513092821	Tysnd1	liver
1001.30276985084	-0.174478941068421	0.139851619895933	-1.24760042964289	0.212177421070694	0.486045677475463	Aifm2	liver
238.975794693586	-0.859198624825021	0.410144522699841	-2.09486797280434	0.0361827306086691	0.178685652390102	Col13a1	liver
53.3030871249316	-1.67026431392414	0.428419124328675	-3.89866889472175	9.67229256952513e-05	0.00263849613631264	2010107G23Rik	liver
237.258069609548	0.184784354878539	0.270451688526118	0.68324348753583	0.49445299736232	0.741402163563344	Tspan15	liver
166.346569848121	-0.334211254785531	0.263515872540833	-1.26827751043248	0.204698865449418	0.477302753548618	Hk1	liver
751.218888718406	0.0875416875012915	0.174662616358408	0.501204489698333	0.616227214874623	0.818325796991027	Supv3l1	liver
2194.25665960048	0.030712862115468	0.139793714409314	0.21970130949909	0.826103784750875	0.930595577984317	Vps26a	liver
460.126089472905	-0.243346449544747	0.225783009393322	-1.07778902495196	0.281127918465814	0.559650646887927	Srgn	liver
742.367883854139	0.545728819118206	0.163956378576845	3.32850007944295	0.000873149800994117	0.0142523637801346	Kif1bp	liver
2005.59147738983	0.100672631709905	0.180189364614146	0.558704626799054	0.576363321150424	0.795143435027478	Ddx21	liver
2144.34501290496	-0.334411868274423	0.145436602404856	-2.29936524055692	0.0214842080142054	0.127534475544172	Ddx50	liver
2093.16650894436	0.243394532161082	0.146415648529928	1.6623532703291	0.0964419626122668	0.317601097789644	Ccar1	liver
4042.88458973455	0.0968663174785776	0.130730515767789	0.740961793883207	0.458716606136175	0.715547116603017	Slc25a16	liver
770.349116063702	0.201517182392638	0.140376109626763	1.4355518394721	0.151129907266755	0.409019749025662	Dna2	liver
429.721527973786	0.197848709436523	0.182895212805521	1.0817599126933	0.279359223465443	0.557993680551033	Rufy2	liver
112.79262813596	0.165773769508151	0.263871410634664	0.628236947342766	0.529848729811866	0.764121384328052	Hnrnph3	liver
6605.06746001515	-0.271625267544386	0.162322254363232	-1.67337047289009	0.0942543868617269	0.314057946361609	Pbld2	liver
9275.4729045754	-0.0957603328306065	0.158160108767353	-0.605464510469361	0.544870398625236	0.773930960336493	Pbld1	liver
3774.89509651647	0.0112403473111837	0.124413451348975	0.0903467204655786	0.928011694365598	0.972472184949316	Herc4	liver
694.762601003639	0.081346838423338	0.157507115123914	0.516464531518723	0.605530005049239	0.81038224059877	Sirt1	liver
568.284929530888	-0.313348724041434	0.235253179891059	-1.33196381951793	0.182872077836562	0.449795766995265	Dnajc12	liver
5046.97351314746	0.460131268268134	0.11736675399475	3.92045662512501	8.83813432122643e-05	0.00246247040262829	Reep3	liver
3219.97423621471	-0.243504686133677	0.14243475885126	-1.70958751991121	0.0873421750553078	0.299864830455295	Jmjd1c	liver
310.040610869285	-0.124937306488049	0.232659723930657	-0.536995851182585	0.591270479856708	0.803083164908602	Nrbf2	liver
747.151488855646	0.0399886659374543	0.163080145443175	0.245208672268375	0.806294861840448	0.923525464757209	Ado	liver
1736.23226042281	0.144856723993624	0.291762648387835	0.496488240677978	0.61954998193507	0.820221686600999	Arid5b	liver
101.502813855763	-0.311744839437544	0.293801495091276	-1.06107301918492	0.288656718372818	0.567663821319055	1700040L02Rik	liver
113.78645682275	-0.037604789395688	0.292159318058018	-0.128713298092448	0.897584512587024	0.958649181316089	Tmem26	liver
2499.85819826653	0.158931636503692	0.180217768577689	0.881886607286335	0.377838130196753	0.650324798702496	Rhobtb1	liver
42.5672602311103	-0.404117750497367	0.473922893213865	-0.8527078060249	0.393821360962351	0.664165864874914	Cdk1	liver
697.332015785467	-0.457429381206211	0.247770777717212	-1.84617970456665	0.064866116817407	0.251907528465114	Ank3	liver
1537.95954932583	0.109982597380391	0.166928514413241	0.658860457525687	0.509985380114574	0.752675537382133	Ccdc6	liver
167.30289822915	-0.179685447560517	0.227935638066419	-0.788316601496769	0.430511539319646	0.693871090302162	Slc16a9	liver
54.7150394801689	0.465181281518337	0.383002577315012	1.21456436345527	0.224532287588706	0.500748196212058	Bicc1	liver
835.861048340319	-0.270738667801928	0.211141639810201	-1.2822608938971	0.199751141264077	0.471825295387167	C730027H18Rik	liver
2289.73621849825	-0.0292977768522751	0.122706647669477	-0.238762751723051	0.811289554757791	0.925490454864997	Tfam	liver
313.587671087843	0.000912356975102681	0.187918731355876	0.00485506137956456	0.996126236701981	0.998280119393711	Ube2d1	liver
5200.83228228047	-0.651229496122476	0.179795397160846	-3.62205877573097	0.000292267691785223	0.00623400768116353	Cisd1	liver
3466.78298555634	-0.275301320301085	0.142336799037679	-1.93415421846185	0.0530941693613597	0.224507155506909	Ipmk	liver
3291.24270217917	0.197156070921122	0.129243254189599	1.52546507867943	0.127143137333369	0.372148891026867	Zwint	liver
275.351053318203	-0.460794828331262	0.290644008439863	-1.58542689665184	0.112869374147346	0.34785617239348	Rab36	liver
1986.25091380522	0.343933902104048	0.154112553650316	2.23170594450365	0.0256344041097043	0.142439668101498	Bcr	liver
1347.58326736632	-0.0761633759965483	0.16059397849513	-0.474260471720352	0.635314175517385	0.828940296255329	Specc1l	liver
61.599041055989	0.137273120141868	0.354413552030825	0.387324692736154	0.698515847277062	0.864538830721932	Adora2a	liver
16161.1851119248	0.0868385707819997	0.136118620400796	0.63796246631289	0.523498113157262	0.760278284126656	Upb1	liver
9826.49971863642	0.286784677453174	0.132330538208846	2.16718439549128	0.0302207967456267	0.159253776508936	Gucd1	liver
1694.1908208258	-0.150937285316024	0.163355632765544	-0.923979680166012	0.355496895396864	0.631383588661143	Snrpd3	liver
84.9179538261985	0.273756080324109	0.382679221966481	0.715366982605832	0.474382308858272	0.727075955607723	Ggt5	liver
70.4004016819414	0.553881767587277	0.393230059896892	1.40854381206897	0.158970103294023	0.419271881722743	Susd2	liver
1062.30195831377	0.0607884957969908	0.198863459792607	0.305679564563478	0.759848634124733	0.898863360368648	Cabin1	liver
10261.3939403276	-0.535120367276499	0.165954338898647	-3.22450362447776	0.00126191259174887	0.0188347499736215	Ddt	liver
2147.13903076829	-0.0140789322490264	0.270509941356131	-0.0520458959047689	0.958492123301563	0.98488591885363	Gstt3	liver
11303.383287188	-0.127195274437595	0.171781199022506	-0.740449334161009	0.459027393323625	0.715700079198466	Gstt1	liver
1897.83955900298	-1.37418632352838	0.278013698469005	-4.94287271129406	7.69797475156322e-07	5.89851186377742e-05	Gstt2	liver
1282.05768889527	-0.659719724488378	0.165220360323502	-3.9929686825319	6.5251189269378e-05	0.00192121536543852	Mif	liver
328.280171312274	0.769691133865948	0.302915766502485	2.540941142658	0.0110554528508165	0.082812638726851	Derl3	liver
695.022535810912	0.389599283005889	0.165303866743315	2.3568673297332	0.018429829969643	0.115957559903141	Smarcb1	liver
36.2240992601872	0.342176936243191	0.533610457666712	0.641248557495309	0.52136120597005	0.759421758325878	Mmp11	liver
10585.9438309393	-0.225067616623123	0.14751163233984	-1.52576181995334	0.127069192369765	0.372116089697396	Chchd10	liver
540.185552233613	0.408831722119753	0.165319151089892	2.47298464469765	0.013398989994195	0.0934975925929038	Zfp280b	liver
221.814392053311	0.100059729191673	0.268095144542005	0.37322469738349	0.708981216191234	0.870289368765967	Dip2a	liver
665.448112277028	0.0880250460277733	0.162736743477145	0.540904556321882	0.5885733702398	0.801328388862019	Pcnt	liver
170.183036646441	-0.262265309000712	0.242444877301676	-1.0817523220933	0.279362597202802	0.557993680551033	Ybey	liver
1310.558188082	0.160930327119882	0.150338541724179	1.07045289434253	0.284415501362204	0.563445861144995	Mcm3ap	liver
4518.21068270706	-0.0882009593143082	0.279053023885583	-0.316072401173736	0.751947554394634	0.895370590850979	Lss	liver
115.229555492633	0.29196909247719	0.267918460324448	1.08976847703446	0.275815143154197	0.554395350400166	Spatc1l	liver
25511.2958341852	-0.0331754959381897	0.112372618157384	-0.295227578409944	0.767820035869813	0.903803819130514	Ftcd	liver
115.491057211033	0.536807079743841	0.317784452115587	1.68921756923649	0.0911777432794659	0.30855845028961	Col6a2	liver
296.591661669249	0.703418916362662	0.260182730033551	2.70355728941715	0.00686016211012341	0.0607715391640535	Col6a1	liver
41.7403625298752	0.136010538789081	0.425484841543422	0.319660127716209	0.749225988500573	0.893810853000981	Pcbp3	liver
214.982275746236	-0.0295513158171221	0.298005736260308	-0.0991635805000376	0.921008390842528	0.969355287999616	Slc19a1	liver
60702.8187983956	0.414461265878584	0.154239556548928	2.6871269287338	0.00720695603769448	0.0624637472143117	Col18a1	liver
637.226887606652	0.171885252169001	0.162933978025398	1.05493804455083	0.291453661066077	0.570512881942195	Pofut2	liver
785.715565752321	0.665069389399228	0.203042526469838	3.27551770046569	0.00105468504971901	0.0165421918489175	Adarb1	liver
1177.82713045838	-0.0302062267923729	0.159485810563693	-0.189397581425023	0.849781219908559	0.940495562719327	Fam207a	liver
457.075820488555	-0.200247938696356	0.219939057423883	-0.910470114048108	0.362574635911365	0.637127208590961	Itgb2	liver
11755.6580053819	-0.166840276114049	0.130089256697432	-1.28250618344369	0.199665137229023	0.47174971801612	Pttg1ip	liver
3794.20937393072	-0.0552456593642009	0.137155727186395	-0.402795132930336	0.687098941919872	0.857797071318818	Sumo3	liver
1713.0961421195	0.102503600115587	0.141770896273263	0.723022868657125	0.469665834472624	0.723732333710683	Ube2g2	liver
6221.20367263851	0.345731420415246	0.136319420314775	2.53618611065773	0.0112067158196948	0.0834262322468618	Lrrc3	liver
272.157681321378	-0.0900234642423492	0.261048678109199	-0.344853170276127	0.730204758026679	0.882761857005421	Trpm2	liver
207.221924695961	-0.456227755963524	0.257467162042526	-1.77198424973577	0.076397171762428	0.277912904838829	1810043G02Rik	liver
2016.1733988839	0.14713926945933	0.147652540729684	0.996523789785011	0.318995714048924	0.597704680353063	Pfkl	liver
43.7381753564864	0.469868918074705	0.473483225027101	0.992366557543429	0.321018746428879	0.599201787360654	Icosl	liver
4502.54193519937	-0.265711261723743	0.123510134746404	-2.15133164796001	0.0314500319921686	0.163431483743321	D10Jhu81e	liver
721.756302085921	0.0444825969567978	0.149138659833299	0.298263354428145	0.765502171010257	0.902223093686038	Pwp2	liver
1472.96621354172	0.250182219477682	0.146269452077816	1.71042015898566	0.0871882058831215	0.299452254408994	Trappc10	liver
9084.56449377198	-0.0429298575158067	0.12337600228194	-0.347959544172157	0.727870566225561	0.881379982227176	Agpat3	liver
2989.60994778058	0.0829824679456245	0.140161218834192	0.592050130812512	0.553817019574585	0.779991310068423	Rrp1	liver
1191.78055941514	-0.568953708719221	0.161918154434044	-3.5138351885735	0.000441686766108485	0.00858643510419987	Cstb	liver
3211.28150689363	-0.352672600468913	0.144583423135762	-2.43923260924427	0.014718490719988	0.0997540525980029	Pdxk	liver
1315.60890589772	-0.26074585502904	0.155783812769965	-1.67376732147431	0.0941763370651712	0.314057946361609	Ilvbl	liver
143.965574746646	0.0457183602689458	0.302157082990131	0.151306597934158	0.879733864806678	0.951298732011176	Syde1	liver
714.001360375763	-0.127685060193711	0.173660635936856	-0.735256205327603	0.462183474595283	0.717827186542563	2610008E11Rik	liver
647.218272800604	0.00138830598597291	0.259929548706895	0.00534108566294016	0.995738450473301	0.998280119393711	Ppap2c	liver
385.88830345342	-0.0840725586498997	0.177146969412914	-0.474592136283934	0.635077712317606	0.828865516861611	Mier2	liver
321.844787850586	-0.921011571071331	0.304987154033205	-3.01983725836222	0.0025291054058029	0.0301537542436164	Tpgs1	liver
1595.10791380871	-0.162718254434468	0.149280306142554	-1.09001822570675	0.275705115692048	0.554297266358345	Cdc34	liver
14073.368001922	-0.164985248612668	0.112226704394859	-1.47010686540508	0.141532813244656	0.395718220299421	Bsg	liver
972.841282958391	-0.166981921933132	0.172738881919874	-0.966672471636045	0.333707792879207	0.610010443591618	Polrmt	liver
591.099450600541	-0.283431683177686	0.190130396025285	-1.49072262564474	0.136034333285781	0.386469416113194	Rnf126	liver
67.3513821834632	-0.62189415388676	0.398008365589382	-1.56251528272739	0.118166648445613	0.356187617339196	Palm	liver
3399.45868563892	-0.159341314487734	0.124589993454509	-1.2789254583749	0.200923306614067	0.473385698896832	Ptbp1	liver
78.7503096369654	-0.312015248115383	0.329283748180737	-0.947557387327004	0.34335482825377	0.61899574162938	Lppr3	liver
48.0586216196447	-2.30185893584476	0.752888642807167	-3.05736971574204	0.00223288683377728	0.0279980112116718	Prtn3	liver
835.893911612591	-0.0877168544718754	0.169728008208086	-0.516808365324918	0.605289939873289	0.81038224059877	Med16	liver
1664.31446090649	-0.0867610196548927	0.148526301349099	-0.584145830515015	0.559122202641606	0.783396237803229	R3hdm4	liver
91.1699281538868	0.598879614448243	0.437005131056384	1.37041780951303	0.170556515804461	0.435096220569523	Arid3a	liver
2015.85975937365	-0.19209540298998	0.153300179488515	-1.25306704552405	0.210181307895633	0.483919834255401	Wdr18	liver
3354.78581303775	-0.0788234284684768	0.137086284622316	-0.57499135442792	0.565297144095061	0.788182939748423	Tmem259	liver
253.1363037774	-0.0135665498405782	0.263579775800686	-0.0514703747636426	0.95895070806419	0.98502865918341	Cnn2	liver
418.834537778144	-0.168947972130303	0.196974997511581	-0.85771277707654	0.391051082967084	0.66239714560603	Abca7	liver
505.799305204845	-0.29484306070058	0.228344184775705	-1.29122211275139	0.196626669467835	0.468399769049119	Hmha1	liver
1014.84277887909	-0.277773049396606	0.137193433173627	-2.02468181582035	0.042900047020463	0.196714884439219	Polr2e	liver
5096.69179545856	-0.199340422566921	0.127685601269237	-1.56118168834552	0.118480888289007	0.356524844798993	Gpx4	liver
1324.31570406103	0.0421681930157136	0.185162458519126	0.227736190980408	0.819851335286981	0.92782799280361	Sbno2	liver
3283.39284146743	-0.0293595298505987	0.124710663399025	-0.235421166485657	0.813881859199822	0.925792304834522	Stk11	liver
8540.36987760079	-0.207813281583301	0.117848940542156	-1.76338693099207	0.0778352524926628	0.28039817675286	Atp5d	liver
1698.83757209972	-0.291659419734842	0.226969825088744	-1.28501407453967	0.198787365771378	0.470565133850783	Midn	liver
1017.18542340228	-0.183945832494794	0.165201850912103	-1.11346108702295	0.26551045180383	0.543397539162994	Cirbp	liver
137.940705650825	-0.547742388804208	0.284591612549073	-1.92466103936833	0.0542717776670819	0.227367170622094	1600002K03Rik	liver
423.562530001869	-0.11070905654554	0.223685115297244	-0.494932603800765	0.62064769522539	0.820696309916806	Mum1	liver
2878.76433706921	-0.170600245944325	0.160892128713252	-1.06033929259756	0.288990269559881	0.567779303823445	Ndufs7	liver
4926.81710548033	-0.083940103848242	0.132543829221793	-0.633300730340151	0.526537276460743	0.762513472844727	Gamt	liver
1339.29479578782	-0.18101106854342	0.13979504331791	-1.29483180696028	0.195378257004555	0.467183548353169	Dazap1	liver
5974.17358965494	-0.286897688393652	0.133105150899878	-2.15542138267404	0.0311288745880266	0.161972474608114	Rps15	liver
629.917579834094	-0.214429615746829	0.158560086391461	-1.35235556833285	0.176261595916495	0.441422160846987	2310011J03Rik	liver
433.298585413662	-0.137115683708237	0.294045395595989	-0.466307875456858	0.640995142390704	0.832338445662537	Pcsk4	liver
19972.6735273745	0.122359231280212	0.138946164607708	0.880623309219603	0.378521738142993	0.650724869534684	Reep6	liver
62.4986830548418	-1.22743975241645	0.385972560335709	-3.18012179764502	0.00147213163079244	0.0210329495468326	Plk5	liver
65.1783438129786	-0.603569008090321	0.368461008991088	-1.63808108147725	0.101404780914136	0.327124514843716	Mex3d	liver
1643.56839245346	-0.2864533161029	0.132563796318829	-2.16087139971423	0.0307052747355747	0.160819100374994	Mbd3	liver
3384.32577506297	-0.524688273308049	0.134997108384258	-3.88666305217862	0.000101631669886307	0.00275366889354116	Uqcr11	liver
603.843844556324	-0.273048727985216	0.198311707318209	-1.37686640732251	0.168553554823208	0.43228604430916	Tcf3	liver
1382.03850277094	0.241159175764001	0.162418216717563	1.4848037408474	0.137595820682181	0.389257207216264	Rexo1	liver
163.205353918866	-0.136282343510816	0.317411845190379	-0.429354939255893	0.667664940973037	0.84672245834974	Klf16	liver
1429.62363581097	-0.522811516061661	0.13404372243279	-3.90030585970784	9.60712390779864e-05	0.00262667501388222	Abhd17a	liver
1047.86605785558	0.0065426030527323	0.156402532638141	0.0418318229402943	0.966632766170982	0.989008986401139	Scamp4	liver
2590.89888727444	-0.290312906465505	0.15259246304264	-1.90253765275668	0.0571009012283043	0.234448707690484	Csnk1g2	liver
1017.90760003991	-0.0944651401720164	0.161831312823769	-0.583725970726611	0.559404691438534	0.783560564810835	Btbd2	liver
4710.53168455201	0.602418701852544	0.178157507870699	3.38138262626439	0.000721220375990043	0.0123417939163019	Mknk2	liver
250.615308263596	0.010043957542662	0.268516279415447	0.037405395175769	0.970161770954659	0.990750636632578	Mob3a	liver
365.577385067682	0.0265964953597883	0.202747998810055	0.131180063506843	0.895632866679356	0.957364375225749	Izumo4	liver
3626.5429192841	0.408315242750916	0.142794910672906	2.8594523490142	0.00424373168925814	0.0436252838361299	Ap3d1	liver
1138.20709131989	0.770243440281661	0.203820803384611	3.7790226880237	0.000157445080163967	0.00385768826857896	Dot1l	liver
613.037064123027	-0.170948835618132	0.148345428747575	-1.15237009364824	0.249169024830715	0.52745088310989	Plekhj1	liver
528.132518845864	0.278463437268509	0.188998882501736	1.47336023146037	0.140653927600593	0.394150909597274	Sf3a2	liver
182.270325376973	-0.462980537316258	0.232017044274194	-1.99545916449619	0.0459928236501938	0.20530377310272	Lsm7	liver
671.180519389439	0.122665676397659	0.2108080115265	0.581883371079751	0.560645242068858	0.784616363667794	Sppl2b	liver
1945.17153299028	-0.75227300985235	0.140203521616762	-5.36557856163303	8.06901488004524e-08	8.59028752273843e-06	Timm13	liver
252.719339387726	0.0530104240608478	0.228874003782666	0.231614002397517	0.816837830882383	0.926724907525166	Lmnb2	liver
35.2464966945531	1.30999163755765	0.5988346666503	2.18756813944214	0.0287010747462393	0.153832751521143	Gadd45b	liver
42.0443888947308	-1.16659835904102	0.454948897335248	-2.56424043639645	0.0103401887409519	0.0792380270753383	Gng7	liver
462.570236453482	0.0436075054472184	0.192249531551327	0.226827629151211	0.820557778642904	0.928103617626377	Slc39a3	liver
2385.04671740157	-0.194248223696009	0.129544647564584	-1.49946931307345	0.133751923849128	0.382648191178361	Sgta	liver
361.373671738948	-0.486885391750116	0.231173467698566	-2.10614737321404	0.0351915528797248	0.175665718316634	Thop1	liver
15227.5333398193	0.309619396837445	0.147674794177906	2.09662995341265	0.0360263455909476	0.178566179358558	Creb3l3	liver
4136.54396364314	-0.193989355909737	0.122186670336217	-1.58764745267175	0.112366081523204	0.346872969136296	Map2k2	liver
1527.76346978894	-0.0122930759364154	0.169226926281127	-0.0726425528523375	0.942090563869597	0.978818654601259	Zbtb7a	liver
525.819330110541	0.0179073544274482	0.191005689997531	0.0937529893883248	0.925305376161669	0.971182633995307	Pias4	liver
66526.4628145597	0.00148051900087063	0.140178495207474	0.0105616699528651	0.99157316327596	0.996477547814798	Eef2	liver
613.030909706289	0.0785529108136544	0.153639656803634	0.511280176276703	0.609154884049313	0.813335352963492	Dapk3	liver
695.376043686512	-0.434851631090302	0.172791953682877	-2.51661967945787	0.0118486651638533	0.0863875405582755	Mrpl54	liver
1194.47035656833	-0.000467449649758341	0.176641029168515	-0.00264632544295468	0.997888540250646	0.998801825377758	Apba3	liver
1057.97486727094	-0.3319076600149	0.226797365569761	-1.46345465336901	0.143343013194536	0.397509674630711	Tjp3	liver
1620.7498750112	0.444737132405178	0.154222770700188	2.88373195725913	0.00392993101803998	0.0413984852425753	Pip5k1c	liver
437.487033875304	-0.189376787329899	0.190219106068201	-0.995571849980201	0.319458217870535	0.59786595534887	Cactin	liver
60.5547231570832	-0.12694160535067	0.395195282658099	-0.321212349744804	0.748049473902786	0.89320448347896	Tbxa2r	liver
665.708629629968	-0.266802890946521	0.196135839275421	-1.36029647581066	0.173736123161392	0.43841561242651	Hmg20b	liver
149.974307261485	-0.66998869833664	0.263106733383769	-2.54645211743551	0.0108824140080226	0.0820272183687421	Mfsd12	liver
94.8560848752778	-0.929974784398959	0.325787357356106	-2.85454534499458	0.00430984786827172	0.0442007415646281	4930404N11Rik	liver
566.930389050411	-0.00593605936182892	0.193763042543063	-0.0306356634573885	0.975560100163568	0.992053085796088	Fzr1	liver
778.714836340522	-0.556482361026773	0.165558062177711	-3.36125196023036	0.000775900108731855	0.0130001090641284	Dohh	liver
5165.79007502563	0.0271039552834935	0.17697440002729	0.153151841618415	0.878278534356948	0.950664996249243	Nfic	liver
2377.74481430952	-0.23933521282633	0.139712547786171	-1.7130545295948	0.0867025081840641	0.298606118939104	Ncln	liver
2368.78502621655	0.0280597779500769	0.127722115095225	0.219693965521605	0.826109504675964	0.930595577984317	Gna11	liver
15582.4925024426	-0.348370048549947	0.129957390051765	-2.6806482371736	0.00734797115032386	0.0632794941887283	Aes	liver
408.270109470099	0.116586720240498	0.179163846623544	0.650726820380613	0.515222846749173	0.755708985121957	Tle2	liver
68.5498406264026	-0.384025825994848	0.343837319524307	-1.11688232832358	0.264044641444281	0.542057514773839	Tle6	liver
45.9843817035012	-0.513431523118344	0.453465563123512	-1.1322392809319	0.25753384978023	0.535895329107715	BC025920	liver
119.211862180883	0.0155697401465479	0.282431168053721	0.0551275564019423	0.956036842686116	0.98428524467039	Sirt6	liver
172.762365931363	-0.324979171476961	0.233785379532192	-1.39007482900449	0.164506155841744	0.42678651170502	Ankrd24	liver
172.277535094702	-0.439203164308077	0.237016649321194	-1.85304773131312	0.0638755175611986	0.24988871769931	Zfp873	liver
159.137248637903	-0.343234549696706	0.23839887880025	-1.43974900982775	0.149938422023977	0.40716912346466	AU041133	liver
224.234524243568	-0.275764853108239	0.227764391704179	-1.21074611814828	0.225992721425444	0.502066932363451	Zfp938	liver
265.721645552059	-0.493412711563432	0.228079603255145	-2.16333553952857	0.030515381511383	0.160375727209234	1190007I07Rik	liver
506.876217860379	0.0981367026538389	0.189860879120028	0.516887434150128	0.605234739956281	0.81038224059877	Hcfc2	liver
1686.54924399521	-0.00738275220662748	0.192068704169709	-0.0384380799492675	0.969338399994834	0.990414553417518	Nfyb	liver
6484.9427938977	-0.0740108891981584	0.133813406692475	-0.553090239816162	0.580201619648628	0.797485108208271	Txnrd1	liver
3296.8139851726	0.105532424287476	0.264703892557988	0.39868104419491	0.690128236885072	0.859565633345335	Slc41a2	liver
870.384594860104	0.00125223160693226	0.174802708072338	0.00716368539561788	0.994284254911567	0.99726859984877	D10Wsu102e	liver
1902.0081566581	0.173590877421578	0.171914897015405	1.00974889573429	0.312615609903071	0.590943712623185	A230046K03Rik	liver
1125.53017484139	-0.0162937416482251	0.146101364752881	-0.111523541725875	0.911201198444351	0.965099155586654	Appl2	liver
184.374070017587	0.032138887675241	0.270868565931861	0.118651226895504	0.905551678778655	0.961923770040373	Nuak1	liver
120.307057464952	-0.101736358756222	0.343601400488093	-0.296088312246991	0.76716263950396	0.903206748212237	Ckap4	liver
2078.73893271469	-0.264701582849189	0.226435005139416	-1.1689958568297	0.242405300651129	0.519347420629221	Tcp11l2	liver
959.531373648772	0.117296013887219	0.13453091606323	0.871888910888627	0.383268983785303	0.653790397252927	Polr3b	liver
455.673903195057	-0.610468278625695	0.23012842439857	-2.65272871102788	0.00798440150613581	0.0669690917384944	Rfx4	liver
672.415269542452	0.179259550091507	0.149662929288204	1.19775518856984	0.231012337162228	0.508058211345813	Ric8b	liver
470.084571385275	0.209810303076008	0.180251779619964	1.16398464147408	0.244430235943609	0.522012380330483	Tmem263	liver
151.535825417708	-0.247026652096332	0.288139848219113	-0.857315132298129	0.391270747744348	0.662667287563776	Mterf2	liver
585.065818909726	0.190900418070183	0.572690032000805	0.333339865202882	0.738877750332868	0.887095742166108	Cry1	liver
45.5799876030332	-1.08484955879141	0.51679386051363	-2.09919204092944	0.0357999753386979	0.177743996419536	Btbd11	liver
809.130735906071	0.0181598045442482	0.164807519601453	0.110187961011508	0.912260309854708	0.965484250575053	Pwp1	liver
502.983992074126	0.508829580274571	0.206520824313485	2.46381730252152	0.0137466160960442	0.0951804145969036	Prdm4	liver
3161.97256141259	-0.145551805666222	0.129466569050076	-1.12424239503809	0.260910208689137	0.538748680145952	Rtcb	liver
836.953275592406	-0.0720059220680723	0.140230288220581	-0.513483377819258	0.607613235231477	0.812359096082368	Fbxo7	liver
205.731959748957	0.245639185774201	0.211359893479376	1.16218446996033	0.245160541544482	0.523200517080029	Syn3	liver
988.258019131607	-0.0355756065345579	0.267452644011689	-0.133016469760542	0.894180355259287	0.95648602730639	Timp3	liver
87.2792268997907	-0.773580537585195	0.324191393584474	-2.3861846825481	0.0170241993730675	0.110597824642836	1810014B01Rik	liver
61592.2002833176	0.26183437510293	0.176772305076861	1.48119568271219	0.138554436338636	0.390811223717185	Hsp90b1	liver
195.113736732698	0.528513627243259	0.244821313631487	2.15877294098175	0.0308677867336496	0.161311674372634	Ttc41	liver
1219.38420649256	0.236367038103049	0.151702266972244	1.55809825931141	0.119209957283579	0.3574515917551	Nt5dc3	liver
3323.03550934503	-0.259026862605295	0.288059250695448	-0.89921383180696	0.368538774216616	0.643191854609878	Stab2	liver
55535.4337312843	-0.107319572223281	0.151414492247274	-0.708780055531393	0.478460976376371	0.730256983736075	Pah	liver
34855.5911459433	0.292875516934553	0.124818871905679	2.34640413314958	0.0189555418449284	0.117362412966798	Igf1	liver
275.091141371857	-0.00721068790812086	0.209345773364741	-0.0344439144494107	0.972523165563917	0.991674231209393	Nup37	liver
905.510884803114	-0.326815533414552	0.184579693877122	-1.77059310561063	0.0766283892631402	0.278118524451463	Ccdc53	liver
54.724247673751	-0.874855577469038	0.461240147403144	-1.89674637473476	0.0578614199111985	0.23611698830791	Dram1	liver
666.77934545313	-0.120899360686165	0.165396955752906	-0.730964848390454	0.464800624113683	0.719263121698946	Gnptab	liver
62.8007334789446	-0.864422537507588	0.432404872000706	-1.99910452791146	0.0455970453297247	0.204523659700443	Sycp3	liver
6863.09843079196	-0.625774481163286	0.19894476210538	-3.14546849357018	0.00165821054441777	0.0227720009695728	Chpt1	liver
76.231040776156	0.0725591212455053	0.39872487516401	0.181977914509746	0.855600058160861	0.942397793414683	Spic	liver
2035.82766746439	-0.153630562383323	0.131084436485061	-1.17199697006618	0.241198272629298	0.518768980273267	Arl1	liver
1079.62682817186	-0.0723124485036348	0.234714678508219	-0.30808660524869	0.758016433308103	0.898309007940744	Utp20	liver
146.228550590377	0.706974024957216	0.417807723252359	1.69210377312771	0.0906261891821912	0.307281019126765	Gas2l3	liver
6340.13142765474	0.0901566843693746	0.145442178376782	0.619879909497883	0.535336853615514	0.768325262347248	Nr1h4	liver
1264.46397550785	1.16710978113595	0.835483435803567	1.39692749265989	0.162435376191367	0.424066314145431	Slc17a8	liver
1712.7763502153	0.470628916177353	0.128207107719275	3.67084886750468	0.000241746259195239	0.00539137721235099	Scyl2	liver
52.2994502877531	-1.15108069813588	0.423255075616723	-2.719591008941	0.00653627055173264	0.0585440049740215	1500026H17Rik	liver
631.061915542039	0.275239212441486	0.187647925133766	1.4667852695162	0.142434478095041	0.396927064186328	Actr6	liver
3623.27912014345	0.277796529595008	0.122762466208796	2.26287837132996	0.0236431880231999	0.13537722604431	Uhrf1bp1l	liver
206.761904033167	0.0903741256619167	0.235359626924732	0.383983127619497	0.700990952915022	0.865714111853785	Apaf1	liver
115.61309791844	-0.424600263988087	0.272786383833202	-1.55653027112861	0.119582050199637	0.357886226184792	Ikbip	liver
12860.0790143385	0.221805748010963	0.115832798057126	1.9148786158267	0.055507985530352	0.230183063057613	Slc25a3	liver
1960.37987186118	0.273624483866212	0.136203436953297	2.00893964195657	0.044543535175779	0.201754039218607	Tmpo	liver
982.41507096839	-0.259601523906423	0.196874068933475	-1.3186171511198	0.18729713688068	0.455833412234387	Nedd1	liver
1160.74553221778	-0.0751684743221099	0.136949784179276	-0.548876179488604	0.583090426361279	0.798792768040122	Cdk17	liver
533.722848773507	0.0717799888067217	0.241985730712648	0.29662901442713	0.766749757009257	0.902897374395199	Elk3	liver
1743.50904605035	0.232105685556489	0.154835140074293	1.49905044452519	0.133860546038406	0.382776888243886	Lta4h	liver
23282.7326674197	-0.209775650544217	0.134888359074479	-1.55517979448759	0.119903255084556	0.358280218248188	Hal	liver
11647.9684570037	-0.0355872196781912	0.143892252888893	-0.247318524546767	0.804661723496653	0.922703320337884	Amdhd1	liver
329.181907175671	-0.155091599099369	0.691154584425132	-0.224394950991126	0.822449999053961	0.928964715862088	Ntn4	liver
2757.53525089914	0.112424839494778	0.147393192031895	0.762754628927841	0.445609744159653	0.706364482842468	Metap2	liver
1149.11523442916	0.0893290054004342	0.178266751231125	0.50109739917018	0.616302577166841	0.818335541204978	Vezt	liver
3208.05097251378	0.671483463663079	0.134124844680835	5.00640627216344	5.54556457094284e-07	4.5076447154353e-05	Fgd6	liver
906.654642081249	-0.152763625918943	0.169744959507949	-0.899959718166412	0.368141687885612	0.642968564410984	Nr2c1	liver
945.712714708104	-0.362770301505333	0.149821482162719	-2.42135037157979	0.0154629654002709	0.103347247346288	Ndufa12	liver
1061.58097989142	-0.0289022234490725	0.194333948152931	-0.148724521493938	0.881771011071617	0.951799522723956	Tmcc3	liver
154.472102881272	-0.52770048745118	0.312940205575536	-1.68626618775518	0.0917445405161422	0.309415986097334	Cep83os	liver
422.578114858351	0.0311438771448631	0.18813529360575	0.165539790796123	0.868519133309078	0.946904916926437	Cep83	liver
1383.87191455457	-0.510341768357387	0.287433254517787	-1.77551400311548	0.0758130554879527	0.276607818154037	Plxnc1	liver
645.261885164236	-0.0382359198739222	0.153997452693627	-0.248289300927538	0.803910576501767	0.922633489345187	Cradd	liver
765.741151326522	-0.31008055114417	0.992024077178236	-0.312573614166885	0.754604627153027	0.896754011157321	Socs2	liver
1234.796555511	-0.214088490030229	0.199648534198631	-1.07232688128444	0.283573236929623	0.562556227438198	Mrpl42	liver
759.412136497743	0.32994335933243	0.172076148140717	1.91742645856191	0.0551837755507741	0.229471420627657	Ube2n	liver
8240.20303791622	0.0644089956460781	0.123833996359289	0.520123694136491	0.602977364905864	0.80975861797472	Nudt4	liver
2448.79605753389	0.0219190896009053	0.14599189313642	0.150139087383595	0.880654882208523	0.951736608283701	Eea1	liver
1651.34693761451	-0.0131868326812119	0.189196416853926	-0.0696991671432821	0.944433104694815	0.980098513092821	Btg1	liver
6041.15797936633	0.0527202450954401	0.136193373635744	0.387098459257225	0.698683318210057	0.864538830721932	Dcn	liver
328.123713230714	-0.610042571946172	0.200713044159714	-3.03937681031205	0.00237068134765266	0.0288613816022	Lum	liver
2031.58340968036	0.212994192955277	0.133192000831199	1.59915153782558	0.10978693546044	0.341615463921142	Atp2b1	liver
318.010453009358	-0.227386448558281	0.234460705341846	-0.969827537739209	0.332132464046283	0.608573937843191	Poc1b	liver
931.323628428607	-0.0636809127143559	0.146055052051458	-0.436006230663763	0.662832208982272	0.843885223204226	Galnt4	liver
1358.94846888675	-0.722745057751228	0.258040520223312	-2.80089753781985	0.00509606966765178	0.0493207707979492	Dusp6	liver
173.491984211452	0.13437395807262	0.289407939469337	0.464306398501056	0.642428240393762	0.83273853154975	Kitl	liver
525.258413448369	0.523665530430391	0.189763372940799	2.75957115598783	0.0057877281423042	0.054015802600403	Tmtc3	liver
156.746262008021	-0.212100260245466	0.228647881898151	-0.927628362374	0.35360038021239	0.629821228006374	Cep290	liver
193.580737757602	-0.13281661762888	0.210592728530394	-0.630679979103412	0.528249792367111	0.763161402927386	4930430F08Rik	liver
461.103562365175	-0.209364341938154	0.27333707330779	-0.765956624194921	0.443702111850678	0.705312028507882	Tmtc2	liver
152.208497491597	-0.12824823360811	0.269031092485517	-0.476704132683154	0.633572819631784	0.827775784630569	Mettl25	liver
475.594790183832	-0.190931845399057	0.179511729861475	-1.06361765633028	0.287501940580274	0.565970928682817	Ccdc59	liver
659.974303242342	-0.523727522413487	0.583517612534696	-0.897535072058081	0.369433467403726	0.643907333006797	Acss3	liver
2242.3530097556	0.15941503843142	0.151117982651246	1.05490449008522	0.291469008513444	0.570512881942195	Lin7a	liver
1019.25717821484	0.298293411173398	0.146946614107302	2.02994409218289	0.0423622225146171	0.195255761245534	Ppp1r12a	liver
282.299685104264	0.121259254613669	0.22538318644821	0.538013755704588	0.590567551966107	0.802778011203563	Pawr	liver
1093.80341880208	-0.468267762772072	0.260517898116364	-1.79744948872156	0.0722642901851052	0.269240425158096	Syt1	liver
1229.84386361304	-0.19547270481683	0.193327995161762	-1.01109363211093	0.311971617870678	0.590840453870316	Csrp2	liver
877.681873290786	0.101546829897925	0.173906681973093	0.58391563076131	0.559277076369338	0.783521978423562	Zdhhc17	liver
2534.97586588045	0.164550301479321	0.195858443765379	0.840149131770074	0.400824775420849	0.670846657506091	Osbpl8	liver
341.865711797478	-0.0157881036910232	0.192735070293382	-0.0819160916951466	0.934713438122542	0.975808224357766	Bbs10	liver
2287.01853785852	0.509387440814408	0.149232519200006	3.41338096780175	0.000641621803996162	0.0113510445618733	Nap1l1	liver
4867.40016611354	-1.13139465630796	0.617334152094285	-1.83271029550162	0.0668456654002167	0.256590094053799	Phlda1	liver
895.934317467968	0.0875408713982398	0.159287256963539	0.549578623343849	0.582608424131364	0.798630280572051	Krr1	liver
5713.77331277763	0.0865585515947443	0.120489587857328	0.718390303544221	0.472516663847713	0.72565709703565	Atxn7l3b	liver
429.15530727413	0.531525834818237	0.928391985089653	0.572523075764069	0.566967657181454	0.789241022436114	Trhde	liver
3329.35395270037	-0.0144683418798896	0.119095581872925	-0.121485126923745	0.903306794443455	0.960884372691155	Tbc1d15	liver
1326.30408476204	-0.0392097406041017	0.174072588165171	-0.225249368768488	0.821785285373983	0.92853169747807	Rab21	liver
7270.86067421283	-0.267935146720694	0.140730297445532	-1.90389099990637	0.0569243815018932	0.233986477647561	Tmem19	liver
445.03203472937	0.289013333364972	0.189799297002469	1.52273131633998	0.127825939720626	0.373148763610564	Thap2	liver
2429.94039799758	0.069298965461425	0.150172889373626	0.461461224795449	0.644467734506102	0.83387564262865	Zfc3h1	liver
358.92450506696	-0.358261779108069	0.312146689374532	-1.14773531580918	0.251077847390258	0.529562534717833	Lgr5	liver
4618.21114135004	-0.221777381739969	0.276787303355184	-0.801255617767176	0.422983678890794	0.688860666311768	Ptprb	liver
1894.86223983057	-0.00203394958471301	0.149750429129993	-0.0135822621446207	0.98916325592492	0.996033028038482	Cnot2	liver
1140.02158289403	-0.0286579130783308	0.15352837357557	-0.186661998762234	0.851925652943752	0.941070822192472	Rab3ip	liver
5367.03722069083	0.119892042883049	0.157652758633811	0.760481731636102	0.446966685005891	0.70685016703311	Cct2	liver
1237.63546141378	0.286276300263032	0.147920865480434	1.93533413513524	0.0529493060828388	0.224052111212294	Frs2	liver
799.42604658429	-0.254844525021875	0.150867634615486	-1.68919281906549	0.0911824846865806	0.30855845028961	Yeats4	liver
3691.64568424504	-0.219432376635	0.204131718179242	-1.07495483108765	0.282394951510752	0.561244220497992	Lyz2	liver
1896.57014993095	0.0748022466874012	0.140278494591968	0.533241013920065	0.593866753765391	0.804391428907869	Cpsf6	liver
151.834061741636	0.51437547349661	0.294590059945387	1.74607206228197	0.0807984306983987	0.286695976021864	Cpm	liver
1296.1768168964	-0.313401482353102	0.155026282872928	-2.021602250568	0.0432174593778634	0.197380565928996	Mdm2	liver
380.060790316232	-0.175793028362775	0.212882016288792	-0.82577679142374	0.408930721811465	0.676955632777201	Slc35e3	liver
305.579798082776	-0.169906567067227	0.215512206536348	-0.788384889180609	0.430471606855759	0.693871090302162	Nup107	liver
2942.0650260534	0.262518203369711	0.139007529289162	1.88851787174509	0.0589564609667057	0.238241929939358	Rap1b	liver
42.8655947449351	-0.195691125305643	0.424600779119003	-0.460882633592145	0.644882811923693	0.833893507894639	Mdm1	liver
1577.5603060059	0.132153710563475	0.162347295545157	0.814018552755729	0.415634322652308	0.682977858421973	Dyrk2	liver
3815.38090399134	0.420565525610215	0.133190688047798	3.15761958868542	0.00159062978936972	0.0222084774869429	Cand1	liver
920.939477676448	0.775689929386839	0.173295906628427	4.47610070242475	7.60186392710516e-06	0.000366266913040219	Helb	liver
50.8365067321469	0.145722541163859	0.412964428923737	0.352869474844696	0.724186296157646	0.879050682463993	Irak3	liver
2301.18094834184	-0.25132871090717	0.127755192680534	-1.96726806663463	0.0491523144872728	0.214162384383155	Tmbim4	liver
197.191333133447	0.0187158415806919	0.249772838287842	0.0749314525509915	0.940269251377796	0.978108311051374	Llph	liver
673.118012703814	0.297337716196651	0.216088264276325	1.37600122427948	0.168821254232949	0.432570753657588	Msrb3	liver
639.910522264105	0.190492404869079	0.172594092620986	1.1037017662441	0.269722529211021	0.547755032358739	Lemd3	liver
857.504958499477	-0.672901353502914	0.235797607124821	-2.85372426678914	0.00432100171530978	0.0442312570369916	Tbc1d30	liver
9893.76284729374	0.305956182215754	0.126111323116415	2.42608018578414	0.0152628975590145	0.102576903706673	Gns	liver
5812.93444794584	0.0827638797792537	0.133106647986675	0.62178622203407	0.534082447214777	0.76725720563575	Rassf3	liver
1691.51157456518	0.00701179018496477	0.144929408387003	0.0483807273002955	0.961412818702515	0.986590139809883	Tbk1	liver
3687.88802836103	0.0249972854412359	0.15722265961246	0.158992892645704	0.87367447345148	0.949196013268606	Xpot	liver
218.256280859284	-0.16059528800401	0.20635888647794	-0.778232964642294	0.436431686521096	0.699290515296854	BC048403	liver
49.0012096763763	-0.163222147327081	0.388341258384113	-0.420305964929525	0.674261952925034	0.851063036662704	Srgap1	liver
685.856528678385	-0.301334412229342	0.149403906639101	-2.01691119735739	0.043704781337057	0.19900398163694	Tmem5	liver
1202.31349469794	-0.816854478956561	0.271851252412514	-3.00478468172384	0.00265768918130752	0.0311921959523214	Avpr1a	liver
153.101610233258	0.323532461824977	0.327577269381741	0.987652355841424	0.323322935630544	0.60141957056242	Ppm1h	liver
4273.50777063869	0.254206413478715	0.146272491485761	1.73789624348787	0.0822290977274359	0.289421247656381	Mon2	liver
2891.75963611511	0.210092568616228	0.134140487637876	1.56621294819943	0.117298772421618	0.354994775404292	Usp15	liver
1877.44299673128	0.0762896283592364	0.152533700064814	0.500149333077344	0.616969931380517	0.818441201445062	Slc16a7	liver
435.367425134468	-0.562153166430203	0.194081285165652	-2.89648312020602	0.00377370943181181	0.0402105619705014	Lrig3	liver
105.278523269485	-0.712245248039136	0.270334405110181	-2.63468221053418	0.00842160891469021	0.06934425410248	Xrcc6bp1	liver
3205.55306337669	0.375144790657629	0.194666886823675	1.92711147118424	0.053965739467191	0.226837122917648	Ctdsp2	liver
486.406039016169	-0.483399512122115	0.177266289411075	-2.72696807570179	0.00639192229284362	0.0575861337636669	Tsfm	liver
262.024111040129	-0.32349400307389	0.298138175841455	-1.08504723409161	0.277900735669582	0.5568880485319	Mettl1	liver
1468.85793617086	0.0907087205515267	0.130937625298429	0.692762835317856	0.48845839882522	0.737631303815728	Cdk4	liver
10765.5848374656	-0.0397492909806633	0.14272806630142	-0.278496668599985	0.780631122002999	0.911039231441219	Tspan31	liver
76.7729623357523	0.104297910714879	0.407781493814416	0.255769112372582	0.798129125511466	0.920034568187106	Agap2	liver
13463.746783309	-0.097931284801788	0.127118941098404	-0.7703909736471	0.441068006131507	0.702787829637355	Os9	liver
3785.99280537283	0.120641288112094	0.121907667229754	0.989611981375437	0.32236381146428	0.600279304216241	B4galnt1	liver
121.914062175942	-0.535646658567511	0.495171181708601	-1.08174037252985	0.279367908392259	0.557993680551033	Slc26a10	liver
60.546459659521	0.0847415161503019	0.428624160984242	0.197705878165411	0.843275190386563	0.93793940057919	Arhgef25	liver
152.780367222682	0.572728987696287	0.280616927650633	2.04096378821926	0.0412544265771375	0.19221175512121	Dtx3	liver
1281.51055674375	0.190060806112101	0.168266255404198	1.12952419161851	0.258676770283464	0.536253928400839	Pip4k2c	liver
62.2740697185545	0.0440021292268414	0.413842328599968	0.106325830360807	0.915323838086397	0.966755555064035	Kif5a	liver
4424.86999122363	-0.103544939045311	0.125660177117894	-0.824007584743143	0.409935248313022	0.678245225856918	Dctn2	liver
1331.44838913599	0.179427509663804	0.148027129613199	1.21212584566528	0.225464211586156	0.501541136350121	Mbd6	liver
196.822637885355	-0.102589235857897	0.229969918379379	-0.446098500972881	0.655526095586082	0.840486737713294	Ddit3	liver
3132.55774460272	0.123555183028827	0.151200157747777	0.817163056370177	0.413835251736753	0.680965766400252	Mars	liver
103.127090938215	-0.252403932626921	0.351409530428583	-0.718261489149388	0.472596070739983	0.72565709703565	Arhgap9	liver
1840.11336498578	-0.120643831603153	0.290258206082865	-0.415643137988358	0.677671155588125	0.853283749861401	Inhbe	liver
3658.08035024415	0.80113780598988	0.193401568830041	4.14235422616407	3.43758861507886e-05	0.00115514500110052	Inhbc	liver
3631.86054350235	0.2483891557522	0.12902303577231	1.92515355312627	0.054210150856027	0.227367170622094	R3hdm2	liver
55.4099499728657	-0.491219747428818	0.388895747473515	-1.26311421665075	0.206548135533698	0.479687080734233	Ndufa4l2	liver
8759.25985330394	-0.305156612221291	0.141118389038759	-2.1624156447639	0.0305861527469438	0.160537267690111	Shmt2	liver
48502.0918384906	0.102773675206337	0.196933734903146	0.521869324505939	0.601761317695446	0.809445919877499	Lrp1	liver
3686.80796630949	0.22477183510427	0.167032035854936	1.3456809884032	0.178405420198714	0.444092671580998	Stat6	liver
755.951352401569	-0.609023777729718	0.305333157487367	-1.99462050810815	0.0460842851241208	0.205483302462258	Nab2	liver
79.759689274832	-0.635401618204212	0.440022322501053	-1.44402132735594	0.148732976202387	0.404809435229574	1700012D01Rik	liver
364.418575055889	-0.00320448079568224	0.20733618971208	-0.015455482229765	0.987668800280643	0.995181855752765	Tmem194	liver
870.227179703444	0.276124771653605	0.184076331956031	1.50005581227879	0.133599945798565	0.382486279856434	Zbtb39	liver
853.352683419064	-0.242874450749504	0.26832941821484	-0.905135383087385	0.365393669079546	0.640324984644441	Gpr182	liver
4036.71408999449	1.20513226918313	0.274474341533383	4.39069190384254	1.12990544338344e-05	0.000507575539547736	Rdh9	liver
4059.9542545444	-0.414785558040911	0.149853382273064	-2.76794258327173	0.00564113929851214	0.0531008652277786	Rdh16	liver
106.619379066575	0.618837594443709	0.321970966061161	1.92202918795528	0.0546020851708274	0.228309194926474	Rdh18-ps	liver
3442.65074576249	-0.612038775188567	0.193566489390967	-3.16190461021569	0.00156740899668444	0.0219510247149171	BC089597	liver
59857.7157468164	-0.0731033080237205	0.123431819475884	-0.592256586139068	0.553678782533736	0.779952725823284	Rdh7	liver
4670.58312605373	-0.114939732686786	0.247019250098082	-0.465306783342384	0.641711777772454	0.832518290290372	Sdr9c7	liver
9897.10550072538	0.774377191065062	0.493876843888	1.56795606161417	0.116891386877054	0.353939940632005	Hsd17b6	liver
173.160406970162	-0.278380937263914	0.221580600661476	-1.25634164919165	0.208992127592911	0.482339153207277	Prim1	liver
4819.14097280607	-0.0130153548138391	0.149101849079065	-0.0872917062680922	0.930439646296342	0.973687485740492	Naca	liver
1140.14521997197	0.0589666853448285	0.166090241600958	0.355027994278553	0.722568619167289	0.877941671405159	Ptges3	liver
68362.2996475404	0.270291541079763	0.109446759503646	2.46961666389728	0.0135257906576193	0.0942184491089521	Atp5b	liver
2962.54905814823	0.555358412626487	0.170961755995207	3.24843652543004	0.00116041095931632	0.0176037122831972	Baz2a	liver
930.704201933622	0.147671901731524	0.167410249375937	0.882095942643938	0.377724926152673	0.650324798702496	Rbms2	liver
21839.3978739856	-0.227195517630416	0.154958080133801	-1.46617406097339	0.142600873277406	0.396927064186328	Gls2	liver
1752.8735923069	0.571110899138833	0.163286781724236	3.49759419046756	0.000469474898972467	0.008950527788651	Spryd4	liver
219.734882128718	0.139723725638509	0.240026655216396	0.5821175382065	0.560487512581788	0.784486884974859	Timeless	liver
18159.4883759184	-0.30651553002116	0.170650429566111	-1.79616031908326	0.0724690235491177	0.269574011532432	Apon	liver
36760.194785784	-0.100419366272365	0.131785486890766	-0.76199108598051	0.446065324383576	0.706364482842468	Apof	liver
3244.0277463819	0.590587362790071	0.14085499024015	4.1928749686692	2.75441271730469e-05	0.00097171803487318	Stat2	liver
1649.03452183206	0.220476654755716	0.147175668108348	1.49805098620925	0.134120004086225	0.383245522365151	Pan2	liver
3517.65138964878	-0.152198596134445	0.135875077630115	-1.12013622210223	0.262655717059493	0.540774991652525	Cnpy2	liver
8269.69748827965	0.499830732504448	0.170788053436123	2.92661414219696	0.00342673735757357	0.0376128197186223	Cs	liver
1112.47948240205	0.0178475207298779	0.164932576389442	0.108211010344833	0.913828311251692	0.966228418536951	Coq10a	liver
2700.98431708379	1.28654654857577	0.186081141260084	6.91390078469894	4.71505003524838e-12	1.71885005830418e-09	Ankrd52	liver
1114.09798168685	-0.192694322630355	0.16208014583347	-1.18888295441405	0.234485728603378	0.511303845404864	Nabp2	liver
447.038696150086	-0.0782065597222279	0.206030260428044	-0.379587734150059	0.704251467254663	0.867425529955319	Rnf41	liver
4838.90255129033	0.215784001395739	0.124777387470358	1.72935181422196	0.0837461484469342	0.29227332921863	Smarcc2	liver
3570.69741055914	0.0501983338675846	0.128159784096825	0.391685537092195	0.695290577636665	0.8624950140473	Myl6	liver
40.301800607029	-0.125700155888245	0.471044197514763	-0.266854270897384	0.789581366705232	0.915181023361012	Myl6b	liver
144.86221052103	-0.406477288506519	0.274611816863179	-1.48018862825936	0.138822914354678	0.391120989916687	A430046D13Rik	liver
1024.27619380153	0.175065418664474	0.178210510436017	0.982351816602463	0.325926555192608	0.603084353068428	Esyt1	liver
272.926200182381	-0.0541952200735894	0.240395521826072	-0.225441887028162	0.821635529071237	0.928449691407757	Zc3h10	liver
4397.27183663087	-0.389188266574181	0.144724815865813	-2.6891605578896	0.00716319566979659	0.0621740576534293	Rpl41	liver
3521.09808189938	0.0746715741112678	0.161700669095457	0.461788900002552	0.644232711668605	0.83387564262865	Pa2g4	liver
8115.39406092389	-0.0332028756106897	0.170867628280767	-0.194319286483753	0.845925885025687	0.93918125005304	Erbb3	liver
3134.75856937558	-0.487089498920032	0.165891574958252	-2.93619190150322	0.00332268702156101	0.0365708370259643	Rps26	liver
62.3863435645207	-0.591618794295884	0.730736046279623	-0.80962037839515	0.418158392170031	0.685346792616549	Ikzf4	liver
7095.83195065841	-0.0770021223468939	0.131546741220263	-0.585359406341819	0.558306077825776	0.782799780448028	Suox	liver
2865.84859601526	0.0613971005738705	0.121922772381916	0.503573691562292	0.614560983848156	0.81674421516718	Rab5b	liver
675.254305838866	-0.047536408251961	0.159435267614601	-0.298154912417933	0.765584932252693	0.902232242848736	Cdk2	liver
452.100233053904	0.267811161555861	0.237424917075764	1.12798254224682	0.259327292035061	0.536677674725922	Dgka	liver
409.978269092776	-0.241157953694139	0.185569569529312	-1.29955549450174	0.193753361755323	0.464901016634251	Wibg	liver
3127.65070517641	0.168218767900088	0.171608453536797	0.980247560263792	0.326963933033719	0.603556255086028	Mmp19	liver
158.969907880597	0.053460841701988	0.224007097872464	0.238656909578934	0.8113716324474	0.925490454864997	Tmem198b	liver
1780.01837602641	0.189144314029928	0.121867615563515	1.55204738482267	0.120650886039655	0.359245300688506	Dnajc14	liver
1159.38350959228	0.139560991089728	0.134246674342607	1.03958620780102	0.298532187405041	0.577152310341736	Ormdl2	liver
344.691402510532	-0.062503330241866	0.184951019174256	-0.33794531395892	0.735404398742855	0.885990427506257	Sarnp	liver
89.4213599932305	0.322546544058486	0.304715861556965	1.05851576747733	0.289820366180665	0.568581051068722	Cd63	liver
654.454763472151	-0.204019840466228	0.163377302647064	-1.24876489671862	0.211751076652018	0.485767630076997	Rdh5	liver
1717.12165838847	-0.395747779254278	0.136605698448841	-2.89700783897011	0.00376740341657724	0.0401789566501988	Bloc1s1	liver
517.888021419943	-0.275805215862872	0.205831837658395	-1.33995410525658	0.180260266232821	0.446475396907728	Itga7	liver
23750.5037753913	-0.128691541008774	0.139340626204944	-0.923575159045807	0.355707552189529	0.631424207295268	Mettl7b	liver
3299.72948439256	0.102182831789301	0.140217450275397	0.728745470614444	0.466157372778751	0.720621073570853	Pisd-ps1	liver
852.019385561656	0.41997905860479	0.138797231386867	3.02584608070596	0.0024793848189905	0.0297377860144125	Sfi1	liver
1146.88531514825	0.283917248090336	0.157008707214345	1.80828982753637	0.0705614042593433	0.265765088678742	Eif4enif1	liver
2448.32454463269	0.0486320631805291	0.12901308957945	0.376954488409333	0.706207427193434	0.868425153486619	Drg1	liver
195.721166995553	-0.0952845852847166	0.239947112846137	-0.397106613013579	0.691288843559194	0.860128888963663	Patz1	liver
359.924622731683	0.0660026817481761	0.220580372440739	0.299222823036571	0.764770036324329	0.901836989063733	Limk2	liver
1728.00733432159	0.0859761074510516	0.14530960821468	0.591675309756742	0.554068033051653	0.780031379032049	Rnf185	liver
51.6733993278799	-0.500364385254774	0.408885269857667	-1.22372807763153	0.221054824015921	0.497249351703727	Selm	liver
203.944248696556	-0.0646091872876132	0.221337255217525	-0.291903806361549	0.770360173122305	0.90487411255804	Smtn	liver
2352.9792774813	0.109521975865281	0.170494994645837	0.642376487900933	0.520628762113176	0.75917139493594	Tug1	liver
972.801945493751	0.544361876620333	0.156055917310549	3.48824886618725	0.00048619531390248	0.00919769957124966	Morc2a	liver
61.6656656729497	-0.0576547009681475	0.372201428473876	-0.154901879889465	0.876898671600018	0.950026208514789	Osbp2	liver
4366.44268502691	-0.336339116465133	0.184864701367788	-1.81937987066545	0.068853495553743	0.261874028299566	Tcn2	liver
1195.69615464268	-0.0355734170864352	0.143783361141397	-0.247409831040549	0.804591066577525	0.922703320337884	Pes1	liver
11756.1524457789	0.675952088740929	0.119938846252944	5.63580616171167	1.74241282874116e-08	2.27839416627784e-06	Sec14l4	liver
1000.08080375222	-0.0782839982941586	0.163748712926935	-0.478073976246086	0.632597553629165	0.827190061973789	Mtfp1	liver
34469.104916532	0.273666016491558	0.13225020188673	2.06930509433891	0.0385174659043382	0.184607615469796	Sec14l2	liver
429.181330289553	-0.0747122420545166	0.169735302940088	-0.44016913841953	0.659814610036671	0.842987442517115	Rnf215	liver
784.531030089918	-0.280988367081724	0.1989295919828	-1.41250160059655	0.157802319735998	0.418065203109366	Ccdc157	liver
994.211733654459	0.254055050706175	0.16578554033032	1.53243190087617	0.125415890343995	0.368497329006009	Sf3a1	liver
513.80941567057	-0.617036358544149	0.238670357182193	-2.58530789423977	0.00972920729312406	0.0763453579411924	Tbc1d10a	liver
50.1474388071593	-0.679696142909822	0.48422071386367	-1.40369076218657	0.160410954483481	0.420841019120616	Gatsl3	liver
2515.51170414666	0.147510150237959	0.125158610180233	1.17858571636053	0.238563182059818	0.516231690746173	Mtmr3	liver
1051.48846086486	0.0647521128146354	0.163083168693172	0.397049636289943	0.691330858107892	0.860128888963663	Ascc2	liver
3806.97047650642	-0.604516970955138	0.160438776072077	-3.76789817122239	0.000164627826283369	0.00398668084955079	Uqcr10	liver
257.681856775967	-0.214836977620118	0.188809189580118	-1.13785233704928	0.25518214650104	0.533978295774485	Zmat5	liver
1762.43099982171	0.587430173270911	0.144972445040237	4.05201259527541	5.07789307294398e-05	0.00156633470942349	Nf2	liver
12724.0802957108	-0.214320321740901	0.122779266542918	-1.7455742144052	0.0808849661361767	0.286695976021864	Nipsnap1	liver
778.635454757053	-0.150514133712104	0.176819619348502	-0.85122982543837	0.394641697901593	0.66419837401514	Thoc5	liver
3333.46936402734	0.166162932359624	0.133139221035586	1.24803894049531	0.212016797070836	0.486006491761081	Ap1b1	liver
617.210032144527	-0.0983585676675539	0.180265168862029	-0.545632682611222	0.585318453861679	0.799520949239923	Gas2l1	liver
3422.11233161193	0.124216560316528	0.119964522712967	1.03544412554147	0.30046154764118	0.579162380727992	Ewsr1	liver
705.071069133514	-0.477938927993782	0.14902533979772	-3.20709839442415	0.00134081127245659	0.019670682448357	Rhbdd3	liver
901.088588170925	0.0562857503910307	0.17908322497058	0.314299401299465	0.75329365289606	0.896441056913602	Kremen1	liver
625.931882451635	0.134653386853282	0.197456820047581	0.681938394535243	0.495277906294575	0.742026716982358	Znrf3	liver
11000.7768478059	-0.0733710503469056	0.220284563179025	-0.333073953472069	0.739078460043246	0.887248166282831	Xbp1	liver
1390.87812339011	-0.00866054656145505	0.1603853517598	-0.0539983637310311	0.956936467894915	0.98447575832367	Ccdc117	liver
1407.88942862085	-0.299223498079994	0.165893356853983	-1.80370994809254	0.0712767892033298	0.267038235476817	Mrps24	liver
1323.72070829055	0.104357311470395	0.144152969956326	0.723934522486851	0.469105934434343	0.723227526751909	Urgcp	liver
358.544649070061	-0.260196663691978	0.257901455185513	-1.00889955624645	0.313022808054536	0.5914346444002	2210015D19Rik	liver
1244.32814081996	-0.161511310340112	0.148809886136664	-1.08535336282553	0.277765179713281	0.5568880485319	Dbnl	liver
217.101726106459	0.0868977195801433	0.240413435530354	0.361451178418736	0.717762195366435	0.874866043048531	Polm	liver
51.9506745722764	0.744931565303881	0.644163048304634	1.15643324662049	0.247503989180838	0.525312806959329	Aebp1	liver
597.110659960399	0.534166727993147	0.203540857259494	2.62437102400595	0.00868091635556748	0.0709452607048076	Pold2	liver
6718.99953648708	1.60226207462916	0.630822863179401	2.53995561694392	0.0110866536934374	0.082977499120373	Gck	liver
2994.19539058984	-0.0735799366149106	0.158548088273085	-0.46408592759678	0.642586183572429	0.83273853154975	Ykt6	liver
408.935947954715	0.813934182975491	0.289390862461079	2.8125773428142	0.00491462027768169	0.0479504314197167	Camk2b	liver
1622.51667961311	-0.0890420286932843	0.165721275344548	-0.537299924274409	0.591060457743933	0.803078530230349	Nudcd3	liver
1239.10681982456	0.00388573920644193	0.164759152526311	0.0235843602425754	0.981184147400882	0.993489209092889	Ddx56	liver
2622.56549111264	-0.0334884768112377	0.123405367141402	-0.271369694746464	0.786106707902557	0.91363437163977	Tmed4	liver
10831.5929859523	0.482456190425685	0.151890336781925	3.17634551774263	0.00149143199786107	0.0212079514589464	Ogdh	liver
1445.49926481156	0.472909283112191	0.170552683989528	2.77280469617955	0.00555754640191969	0.0526021111055027	Zmiz2	liver
7468.14558349745	0.0610180855806013	0.133652127144291	0.456544066184043	0.647998790531546	0.835701699195379	Ppia	liver
1192.80428661368	-0.0254424751225314	0.184582668465313	-0.137837833497962	0.89036858292349	0.955242491087986	H2afv	liver
2729.059361377	0.595319189236114	0.191949243065254	3.10144067113478	0.00192581459380659	0.0251025422441742	Purb	liver
86.8874415424425	-0.438821910947156	0.292278778440783	-1.50138136366976	0.133256951304458	0.382437763928319	Myo1g	liver
38.1617772091322	-0.309590628074424	0.445789572913937	-0.694477051248108	0.487383087673118	0.736770362491532	Gm11974	liver
871.532198393234	0.114255608797253	0.161708872727358	0.706551266298714	0.479845383105219	0.731329601866431	Ccm2	liver
1554.18146332608	-0.0957805020766919	0.143928874357619	-0.665471070375404	0.505749241117364	0.749893848864822	Tbrg4	liver
47.9507777823834	1.53176866525617	0.486234025979289	3.15027041180663	0.00163119406817884	0.0225037438534306	Adcy1	liver
3391.28860594164	0.427812690439941	0.593783630674624	0.720485827394541	0.471225922728956	0.724902173091312	Igfbp1	liver
681.394604765123	0.27826641897439	0.291733027879208	0.953839272149898	0.340165006946743	0.615551298671678	Igfbp3	liver
2438.28621852095	0.305618331447664	0.151009074251084	2.02384083846186	0.0429865307688043	0.196776242446239	Tns3	liver
538.23249272845	0.335858840065776	0.177298379385603	1.89431421330323	0.0581833155396248	0.236787985771883	Hus1	liver
59.6602801410463	-0.855717746311463	0.352274821001636	-2.42911981014814	0.0151355297699168	0.102005839289691	Gm11992	liver
74.1661507116325	-0.116463121587619	0.43490073535132	-0.267792422777898	0.788859103528745	0.914865601188515	Upp1	liver
193.178073846754	-0.408747620814612	0.23813648101502	-1.71644268476794	0.0860810497441636	0.297487799029672	Ikzf1	liver
5630.79651669695	0.360110949977085	0.230516394058434	1.56219236140662	0.118242679557659	0.356242308403979	Ddc	liver
231.81739228109	-0.0974878220987317	0.242340736973827	-0.402275834084223	0.68748103748929	0.857836000518221	Grb10	liver
1225.72179169994	0.745437323698436	0.193813626908451	3.84615537921154	0.000119985690554538	0.00313107995091342	Cobl	liver
162.404199066842	-0.568795635987546	0.284770475773367	-1.99738274988949	0.0457836202669258	0.204821027031105	Sec61g	liver
28361.3880472101	0.203866231219319	0.242864318225659	0.839424386047093	0.401231204158748	0.671311303555308	Egfr	liver
268.765137080101	-0.186661642695328	0.247880434295451	-0.753030965214641	0.451431306665073	0.710067155544429	Plek	liver
2333.54153029566	0.565651512883081	0.158803444570294	3.56195997142051	0.000368096516179814	0.00748655851752798	Ppp3r1	liver
1323.25224563957	-0.437598731332774	0.218669840821779	-2.00118466126029	0.0453724933379974	0.203954883636206	Pno1	liver
589.104799073453	-0.0328891698199053	0.173686567721175	-0.189359316908739	0.849811207975915	0.940495562719327	Wdr92	liver
1985.89548419436	-0.136243930795502	0.170537447235742	-0.798909172172403	0.424343080100374	0.689434470476837	C1d	liver
366.970159654637	-0.408101237917096	0.179828524069043	-2.26939102141777	0.0232445577090214	0.13384257709891	Etaa1	liver
119.282751776152	-0.0511381985757303	0.309503569936756	-0.165226522544409	0.868765690186484	0.946930638546955	Meis1	liver
375.650237223985	0.118589397806791	0.218393994577065	0.543006679448525	0.587125203530423	0.800536002805726	Spred2	liver
5731.93770943692	-0.0160851304442154	0.149997789618914	-0.107235783174415	0.914601928223194	0.96642294841434	Actr2	liver
7904.10269221801	0.450236081127221	0.165335430976143	2.72316755379666	0.00646592553439283	0.0580485702826461	Rab1	liver
971.737531691079	0.410387685990612	0.17261487752027	2.37747575345828	0.0174315889553114	0.112140115044062	Cep68	liver
265.103138949653	0.328935866340064	0.281348795017468	1.16913906213688	0.24234760806932	0.519347420629221	Slc1a4	liver
1193.21858312784	0.123994833256469	0.141504945436938	0.876257948961423	0.380889819837722	0.651978448014769	Sertad2	liver
2508.18072547953	-0.0440421603746175	0.118700894661419	-0.371034780321098	0.710611626776651	0.871245196710468	Aftph	liver
1271.58970439106	-0.333417840186135	0.29796877997139	-1.11896904171688	0.26315334655048	0.541147885215969	Lgalsl	liver
1248.06180540435	0.15195124546824	0.134966669948555	1.12584273973833	0.260232089810926	0.537532973974148	Peli1	liver
2643.18689059677	0.0382116070431584	0.128311511304072	0.297803421180229	0.76585320324458	0.90237159990522	Vps54	liver
21335.4277827161	-0.00595098153226925	0.166995124795916	-0.0356356602597946	0.971572873594633	0.991393716945674	Ugp2	liver
38746.1677626208	-0.00704390315180429	0.122096346526394	-0.057691350742273	0.95399448333041	0.983432873858592	Mdh1	liver
136.210421401279	-0.168413866389077	0.329646852227642	-0.510891777825248	0.609426838870566	0.813335352963492	Wdpcp	liver
681.962390718442	0.332610356992703	0.14515443938322	2.29142393719411	0.0219389064393681	0.128995622905962	Ehbp1	liver
45.930142618746	-0.118966668522626	0.400284377953938	-0.297205374665699	0.766309718781715	0.902644268769611	Tmem17	liver
1124.96553312183	-0.25364748790411	0.151956782715237	-1.66920806937218	0.0950761514648181	0.315639418098152	B3gnt2	liver
1555.38340873099	-0.271311779326693	0.169108132984519	-1.60436860450426	0.108632827098191	0.339266072168027	Commd1	liver
1119.71837824947	-0.171256123551932	0.19029385729615	-0.899956130929701	0.368143596979456	0.642968564410984	Zrsr1	liver
4856.89835358434	-0.0836340685770747	0.147698529125592	-0.566248486509695	0.571224873414568	0.791503711953151	Cct4	liver
89.4975870184771	-0.077616529955497	0.294891185941817	-0.263203966939897	0.792393373398984	0.916871738114089	Fam161a	liver
2340.25312371296	0.450150991150893	0.150919845802807	2.98271568431804	0.00285703263116288	0.0328900502898464	Xpo1	liver
3631.23968149346	0.272679880507492	0.136188543778331	2.00222333643073	0.0452607169166135	0.203687377618804	Usp34	liver
1125.86886750608	0.197482871914299	0.149091425134574	1.3245756537376	0.185311935347033	0.453095897228046	Ahsa2	liver
944.318075320089	0.225636198738821	0.162417980434758	1.38923164870565	0.164762320753998	0.427174723851421	0610010F05Rik	liver
3088.05639308479	0.0506774634254375	0.134538837940102	0.376675346698027	0.706414886142075	0.868425153486619	Pex13	liver
1311.66061181934	0.241395058147261	0.135682720940688	1.77911421936168	0.0752210379382005	0.275383166888786	Pus10	liver
115.917466012017	0.221197648249029	0.254547612330635	0.868983394594612	0.384856213398081	0.65535559807425	Rel	liver
420.451961603477	-0.066164387217853	0.198058553289623	-0.334064780939302	0.73833067559239	0.887093347148047	Papolg	liver
397.882480551506	-0.253192712706739	0.196041157812403	-1.29152834808814	0.19652053174341	0.468332408255392	Fancl	liver
167.491246647666	-0.207403410900272	0.269024437620715	-0.77094635987189	0.440738726505315	0.702356190205185	Vrk2	liver
336.542904128844	0.391986270325962	0.195591456704121	2.00410732110316	0.0450585653501306	0.203101728772177	Efemp1	liver
1622.05469937116	-0.172352315493971	0.179893225113957	-0.958081191689076	0.338021818842931	0.613485408891811	Pnpt1	liver
3203.62559342326	0.149979280495603	0.150463064845202	0.996784696961367	0.318869027805578	0.597704680353063	Smek2	liver
631.240407141531	0.104202704110195	0.182546607732391	0.570827940352381	0.568116281234072	0.789512141038615	Cfap36	liver
91.883301915516	0.211972224967955	0.373778843719387	0.567106000057864	0.570642166665751	0.791002963888122	Ccdc88a	liver
685.754184787073	-0.383401827522903	0.156508077867363	-2.44972548859636	0.014296516293665	0.0977754923324562	Prorsd1	liver
1823.27491200834	-0.185738360095336	0.153960810640531	-1.20640024771628	0.227663200587791	0.504102393350106	Mtif2	liver
6010.05980623404	-0.0806238802162759	0.173516458268228	-0.464646875696623	0.642184357657584	0.83273853154975	Rps27a	liver
4114.97436778395	-0.0624581210255674	0.173068974155884	-0.360885718137505	0.718184880428786	0.875001429163287	Rtn4	liver
68.947144118123	-0.170068519252504	0.39281028773188	-0.432953322670071	0.665048680602143	0.845045634700143	Eml6	liver
4590.33793718359	0.127327024150402	0.130533849422539	0.975432998518593	0.329345521818224	0.606185224521609	Sptbn1	liver
46.8916983620271	-0.00642842075882862	0.429435155958441	-0.0149694794886582	0.988056529493804	0.995420823198264	Acyp2	liver
9820.50621903333	0.32761578818981	0.129399012082166	2.53182603884007	0.0113470270959237	0.0839512521303576	Psme4	liver
1545.03618214107	0.102332856192316	0.132013840280484	0.775167633748806	0.438240610780783	0.700061622322104	Erlec1	liver
528.65584897355	0.148439930929539	0.165774764259515	0.895431410158186	0.370556516168367	0.644190439664055	Asb3	liver
1124.31881206382	-0.534773363497743	0.250754264200991	-2.13265910034175	0.0329527013300079	0.168331633545645	Chac2	liver
803.057877581815	-0.367783679252964	0.17836086355568	-2.06202006382499	0.0392058258194144	0.185980317274272	Bod1	liver
79.0150072450172	-1.09072701095362	0.331251606797998	-3.29274481563123	0.000992144792147481	0.0158137416428826	D630024D03Rik	liver
4876.95764525993	-0.0104430616629298	0.160400368119646	-0.0651062200501941	0.948089428058497	0.980782166957066	Cpeb4	liver
122.076341240157	-0.667313114330496	0.301591045411319	-2.21264233299896	0.0269223140296664	0.147216108080403	Snrnp25	liver
196.576191281997	0.170843566846291	0.302556462193042	0.564666725701222	0.572300470662255	0.792355237894686	Rhbdf1	liver
309.888809182577	-0.22759543007706	0.203319731945928	-1.11939666602349	0.262970952667485	0.540974752985246	Mpg	liver
669.502898206899	0.168844529296437	0.205088022620215	0.823278352091316	0.410349721211968	0.6783711895259	Nprl3	liver
66.9674283653073	0.51270574240779	0.448223987410405	1.14386056259489	0.252681468648817	0.531333345192321	Sh3pxd2b	liver
88.8866522424149	1.10189243439344	0.378622135817531	2.91026944849436	0.00361117282725621	0.0391020784085439	Ubtd2	liver
188.144498393111	0.100764964569305	0.251178011033908	0.401169529747179	0.688295312664008	0.858199560097878	Stk10	liver
2054.85654837392	0.0802628285293174	0.128954315256945	0.62241289381741	0.53367040424505	0.766788520929035	Fbxw11	liver
3507.8401673251	-0.102421202333918	0.145155910039182	-0.705594435020053	0.48044038599754	0.731329601866431	Npm1	liver
274.271709533426	-0.291684950856717	0.236471271748867	-1.23349000789612	0.217393002395122	0.492511830284993	Lcp2	liver
218.757183471583	-0.155327040119254	0.287998075298396	-0.53933360477607	0.589656685234804	0.80198642434988	Dock2	liver
4936.9963418924	0.169437703404821	0.18817713863802	0.900415983743665	0.367898917857602	0.642933821258312	Pank3	liver
1667.30243935825	0.0245845693625915	0.154739051140665	0.158877601881137	0.873765307642273	0.949196013268606	Rars	liver
3154.21350295565	0.619869468709408	0.174590889187253	3.55041131639225	0.000384629699332711	0.00768620478899089	Wwc1	liver
1953.97461319051	-0.158729943098062	0.153295633121573	-1.0354498681132	0.300458867041444	0.579162380727992	Mat2b	liver
1075.93041047128	-0.524494459032475	0.194545857763107	-2.69599396801928	0.00701789375279091	0.0613555682020892	Nudcd2	liver
1957.71667722786	-0.0220440086288473	0.185527054929143	-0.11881829654045	0.905419312828619	0.961868097256118	Ccng1	liver
846.710503185454	-0.545639063472007	0.226969411679249	-2.40402025733362	0.0162158746764693	0.106793632329669	Pttg1	liver
1429.25317273301	-0.129470053972606	0.14358485786838	-0.901697128058502	0.367217779039734	0.642190708220381	Slu7	liver
490.201081690627	0.316180179237102	0.193606034697373	1.63311117719717	0.102445616254472	0.329211956510857	Pwwp2a	liver
842.172452666308	-0.0586581124034047	0.160197253282651	-0.366161786181869	0.714244355231217	0.873223975633193	Ttc1	liver
3045.66395775253	-0.440956364333597	0.161163384166841	-2.73608280573896	0.00621753782169596	0.0564079788800923	Adra1b	liver
569.667837849663	-0.166900695649274	0.184418187735403	-0.905012123255097	0.365458964635805	0.640324984644441	Ublcp1	liver
774.600753544781	0.317007279732073	0.245401182308444	1.29179198221477	0.196429192738248	0.468332408255392	Rnf145	liver
2855.77943930213	0.0848516412525878	0.14538142566666	0.583648432827597	0.55945686782932	0.783560564810835	Clint1	liver
234.59636920481	0.139862058772436	0.260542094999104	0.536811753098543	0.591397652362868	0.803083164908602	Lsm11	liver
162.545802200757	0.259066655261101	0.261208005319989	0.99180212698204	0.321294059899882	0.599436653318172	Thg1l	liver
98.4924440235036	-0.217329663556939	0.293721674064004	-0.739917012421703	0.459350350959609	0.715733669620717	Adam19	liver
117.130671631212	0.466469148309503	0.282202468522313	1.65295913516299	0.0983391806205286	0.321972014102445	Cyfip2	liver
558.504029159807	0.0625244800797794	0.158484078575216	0.394515844379317	0.69320023169123	0.861398490573856	Med7	liver
6257.31972370805	0.578689206705363	0.220073135111767	2.6295313438029	0.00855026494793544	0.0702593492647973	Timd2	liver
499.565785568436	-0.180438923048869	0.206624552183286	-0.873269517790947	0.382516191115093	0.653510895303124	Timd4	liver
15292.5883137335	-0.363339709877315	0.1237608623211	-2.93582076807629	0.00332666472143609	0.0365811486278576	Gnb2l1	liver
42.294061199708	-0.0500520221936645	0.443371316382223	-0.112889626243921	0.910118060812621	0.964647060155426	Snord96a	liver
1307.91249105698	-0.0108554028484888	0.144974099983204	-0.0748782220392913	0.940311604199203	0.978108311051374	Trim41	liver
319.495076716723	0.771349468366341	0.300641032240803	2.56568261031154	0.010297300304624	0.0791543275812309	Trim7	liver
3166.49959515616	-0.507984669464669	0.220920755113205	-2.29939766955968	0.021482368163778	0.127534475544172	Irgm1	liver
34.0691770139323	-0.349340120272458	0.475656372734507	-0.7344380109198	0.46268182749951	0.717923692095847	Gm5431	liver
76.0225043473473	-1.97272329580703	0.645994914149966	-3.05377527376177	0.00225981291924923	0.0281427280736558	Tgtp1	liver
44.3538166042122	-1.62021159111183	0.545252528381388	-2.97148845127141	0.00296360019771874	0.0336976468606393	Tgtp2	liver
1778.04386199964	-0.524473410463028	0.258914967401645	-2.02565890927979	0.0427997502416301	0.196369563465603	Ifi47	liver
124.732630439728	-0.0786527697293861	0.380030752737383	-0.206964223718333	0.836037798880056	0.933874350579383	Btnl9	liver
987.855518536185	-0.195669848859672	0.15085190008997	-1.2970990006952	0.194597125328828	0.466149625190322	Zfp62	liver
3457.04468342906	-0.141554824364769	0.128744408139596	-1.0995027000418	0.271548856915767	0.550325597826259	Mgat1	liver
1174.65308938938	0.0583083545793974	0.272364295747023	0.214082225496822	0.830482936477681	0.932341176205908	Flt4	liver
2919.28801818206	0.375163692056655	0.134117086882951	2.79728482608688	0.00515340806922508	0.0497955815845604	Cnot6	liver
3103.84672466316	-0.141173630793265	0.128784729754494	-1.09619852495236	0.272991905004096	0.551670185990135	Mapk9	liver
3565.06387179782	-0.212164906975434	0.12950980637895	-1.63821499628092	0.101376852406278	0.327124514843716	Rnf130	liver
3564.01435641551	-0.0254512034156088	0.127698999850895	-0.199306207921177	0.842023223372605	0.937052671338801	Tbc1d9b	liver
493.740353721832	0.0344298864575117	0.220971431269064	0.155811483230103	0.876181618870662	0.950026208514789	3010026O09Rik	liver
19424.5012989637	-0.057757487192685	0.111206731160587	-0.519370424702806	0.603502451455089	0.810011658039129	Sqstm1	liver
1139.14387832617	-0.0848574612576723	0.191939050497901	-0.442106288624159	0.658412293964917	0.842288859586263	Mgat4b	liver
1080.31870430934	0.304877707809553	0.145042382452503	2.10199048481151	0.0355541093270845	0.176815186111958	Maml1	liver
22377.2712503644	-0.0530739674060745	0.137232472148239	-0.38674496331119	0.698945025444921	0.864607573892277	Canx	liver
3357.22870780762	0.249089242969347	0.132394121713819	1.88142222437771	0.0599145060057735	0.24017711004647	Hnrnph1	liver
939.532594326059	0.0325213899127943	0.153756326289499	0.211512532183954	0.8324873541498	0.932956178973817	Rufy1	liver
116.718782540826	0.646801782889024	0.30518591998607	2.11936967117797	0.0340592378494185	0.171651709815042	Adamts2	liver
35.9837121668063	-0.179395301592947	0.453864089194906	-0.395262162977402	0.692649420244104	0.860868624654717	Zfp354c	liver
40.3198777039655	-0.676662187272133	0.449669787071378	-1.50479798004468	0.132376023253365	0.381159301038292	Zfp454	liver
294.978760494824	-0.130489585914078	0.220451329016311	-0.59192015986632	0.553904053359479	0.779991310068423	Zfp2	liver
65.2385794352679	-0.729396117290281	0.394596540491692	-1.84846049684421	0.0645357539842755	0.251185241381011	Zfp354b	liver
195.748152542267	-0.321230618492541	0.215472061396172	-1.49082259858237	0.136008076966803	0.386469416113194	Zfp354a	liver
1609.78367561613	-0.140101247437958	0.176371815669773	-0.794351676348754	0.426990727907586	0.6913943142004	Clk4	liver
579.831413898237	0.0446386091670619	0.169858394937187	0.262798957823481	0.792705538848107	0.916871738114089	Phykpl	liver
4881.02802228104	0.0786460531853429	0.135704398315449	0.579539456064847	0.562225231625549	0.785639393246062	Hnrnpab	liver
655.715955312035	-0.696324131765671	0.214116690490505	-3.25207778137477	0.00114564665952819	0.0174236780203845	Nhp2	liver
635.592594733577	0.125729323122915	0.17164618310024	0.73249122614914	0.46386879599889	0.718603777262571	Rmnd5b	liver
181.958578230858	-0.43578113475085	0.214924386739123	-2.02760208537808	0.0426008760091593	0.195715192841922	N4bp3	liver
406.512018201946	0.194906106066578	0.217343650784765	0.896764664451105	0.369844506951832	0.643907333006797	D930048N14Rik	liver
919.51354921709	0.0469782089951062	0.14965373787225	0.313912700498056	0.753587344017341	0.896701854453869	0610009B22Rik	liver
5736.05791110077	0.505964378543918	0.123947244762362	4.08209460011781	4.4631621457149e-05	0.00142797448438697	Sec24a	liver
9008.40196816809	0.186891980616801	0.192112380822629	0.972826320805178	0.330639628763545	0.607279062470354	Sar1b	liver
757.753744287086	0.115235986603178	0.269877592529486	0.426993532597887	0.669384038315981	0.848276622873828	Jade2	liver
674.243030494353	0.0118085738472806	0.155624400882726	0.0758786782811725	0.939515620213379	0.977798504296821	Cdkn2aipnl	liver
4723.41908030684	-0.124988219639011	0.142617464358364	-0.876387896821278	0.380819195768758	0.651978448014769	Ube2b	liver
5572.4784401385	0.101532474833186	0.136144517094214	0.745769840756234	0.455806461470104	0.713954050753821	Ppp2ca	liver
7659.99553955502	-0.116545615168112	0.150037575463381	-0.776776182953961	0.437290830817561	0.699357003536204	Skp1a	liver
135.457511899885	-0.296167885898302	0.304414014965664	-0.972911467074562	0.330597305271524	0.607279062470354	Tcf7	liver
8599.47007946694	0.0425740699149537	0.119472623834386	0.356350003444892	0.721578466435395	0.877180754321989	Vdac1	liver
7545.88144710778	0.134728804846019	0.142807807289892	0.943427445619463	0.345462310337503	0.621212495270577	9530068E07Rik	liver
6794.54755586044	0.253318163022045	0.150981254025082	1.67781202148422	0.0933838017773358	0.312752543257614	Hspa4	liver
107.09670126211	-0.286962693404778	0.284408166816173	-1.00898190307684	0.312983313298058	0.5914346444002	Zcchc10	liver
6969.93362694357	0.229838205655313	0.110593096761983	2.07823284078904	0.0376879186893811	0.182446462985723	Aff4	liver
2531.48909313484	-0.00251553910113644	0.266840802675285	-0.00942711562818062	0.992478361396178	0.996537408195979	Leap2	liver
8788.38295715193	-0.872722037791464	0.169212464189044	-5.15755173222028	2.50199735657856e-07	2.31530986151078e-05	Uqcrq	liver
1654.81659235587	0.371028644539086	0.165306145698438	2.24449395375741	0.0248006375096924	0.139612386168273	Shroom1	liver
199.536330976766	0.421912282674138	0.207050062223305	2.03773076976477	0.0415768652146433	0.193175273732825	Sept8	liver
233.183032818205	-0.264764832839898	0.219800300074546	-1.20456993348099	0.228369369529556	0.505015352103045	Kif3a	liver
717.893548104412	0.0570496188802412	0.14982936563676	0.380763935279216	0.703378422423581	0.866629715405536	Rad50	liver
1853.80199308309	-0.358368663185642	0.163560145715091	-2.19105125896557	0.028448083301912	0.152849683841894	Irf1	liver
1044.75752161943	-0.148815043866914	0.193220246165209	-0.77018349174275	0.441191054997887	0.70289079481189	Slc22a5	liver
33.471315507271	-0.0746465194693636	0.480858281572362	-0.155236006802829	0.876635263022035	0.950026208514789	Slc22a21	liver
214.962967996448	-0.287719538974352	0.252207806307132	-1.14080346356915	0.253951718974056	0.532793718042883	Slc22a4	liver
33.5324547401307	-0.325164500591428	0.450090354636844	-0.722442721203806	0.470022329251884	0.723805507027671	Pdlim4	liver
265.706903694205	0.451293424859438	0.232683108117809	1.93951949718217	0.052438112774438	0.222672254386336	P4ha2	liver
2855.86614776455	-0.284816591812562	0.171926015662968	-1.65662299980765	0.0975957193570648	0.320435727037525	Fnip1	liver
1700.3368700014	0.1615679620252	0.131957440252647	1.22439448443271	0.220803448991973	0.496962673783617	Rapgef6	liver
801.857478442867	0.163044348063308	0.1679730912454	0.970657543148438	0.331718840781974	0.60831976442182	Cdc42se2	liver
74.984520624566	-0.939799103225045	0.395472833155046	-2.37639358366898	0.0174828034726561	0.112349426162422	Lyrm7	liver
6866.40790101397	-0.406659063785547	0.158294172211435	-2.56900843602991	0.0101989974599738	0.0788521461719055	Hint1	liver
109.033731991975	0.402733282835041	0.264504623237912	1.52259449345351	0.127860188289438	0.373158191441519	Gpx3	liver
529.357889368336	0.417900922704633	0.185415778832013	2.25385846521321	0.0242050733561283	0.137158281900247	Tnip1	liver
5507.38282180696	-0.0794355718056732	0.143796239201985	-0.552417589267361	0.580662282364815	0.797485108208271	Anxa6	liver
6129.78945006652	-0.0635308678410838	0.136285651993418	-0.46615962070719	0.641101250000754	0.832338445662537	Gm2a	liver
3299.48084351129	1.01199097635611	0.124713318147281	8.11453813746657	4.87635876300594e-16	3.72031670989291e-13	Slc36a1	liver
3324.0303077854	0.336355974467166	0.200622830039471	1.67655881636697	0.0936287857874758	0.312963126708345	Sparc	liver
2083.62557791025	-0.901769326580268	0.167591496260594	-5.38075825266264	7.41727468165596e-08	7.96694771610011e-06	Atox1	liver
1771.60128801841	0.126890516036131	0.158190808988756	0.802135831071897	0.422474390271239	0.688579962216018	G3bp1	liver
2094.23441694254	-0.0805384910349334	0.131003541908895	-0.61478101936315	0.538699345801856	0.769981971025768	Fam114a2	liver
842.696663915161	-0.297309385227871	0.155387654584708	-1.91333980825224	0.0557045646442525	0.230918646681722	Mfap3	liver
343.070916751919	-0.157604481666824	0.180776562203044	-0.871819221176504	0.383307006988952	0.653790397252927	Galnt10	liver
111.09144775209	-0.694342744007257	0.2632576161692	-2.63750296804705	0.008351889466958	0.0690537665206218	2010001A14Rik	liver
534.214149333742	-0.0647959404202218	0.176009560225484	-0.368138755288135	0.712769774405718	0.872546215910042	Sap30l	liver
7543.59136708573	0.379419617947223	0.111573692405816	3.40061899687962	0.000672334655939028	0.0117220085665891	Larp1	liver
2514.17673821601	0.245761356778428	0.13564897289808	1.81174506174168	0.0700255974177682	0.264559588744751	Cnot8	liver
743.93407406195	0.430785887108684	0.175703050766577	2.45178376373776	0.0142150056170355	0.0975451886816889	Gemin5	liver
653.99837076065	0.0251079341160027	0.178615697451293	0.140569583044902	0.888209978808209	0.95419291261091	Mrpl22	liver
307.577536012182	-0.879123717835493	0.308898696454023	-2.84599361514736	0.00442730825747596	0.0448320861426227	Gm12250	liver
2872.81349749925	-0.467608605931982	0.250397231093628	-1.86746715963937	0.0618363787477346	0.245346845757008	Igtp	liver
3484.15368280801	-0.682484079813578	0.223767026541598	-3.04997608611788	0.00228859588109403	0.0283249058123057	Irgm2	liver
230.155237443151	0.199704546039962	0.212846809721134	0.938254824216581	0.348113469860031	0.624414138482781	Zfp692	liver
567.205867205774	0.314382498749652	0.159546231386109	1.97047900171851	0.0487834992290865	0.213544494346181	Zfp672	liver
812.9432915555	0.0880770932687034	0.191875476231094	0.459032571534174	0.646210776292813	0.834648447369824	Sh3bp5l	liver
294.216512648206	0.105045197609258	0.210015813654937	0.500177561780424	0.616950056309965	0.818441201445062	2810021J22Rik	liver
198.178810654119	-0.643245138708902	0.313246268976248	-2.05348060748228	0.0400259886359585	0.188532749918004	Zfp39	liver
3067.36387115222	-0.254600634468323	0.167256040481309	-1.5222208641055	0.127953748981878	0.37325014555092	Rnf187	liver
50.9900350697396	-1.14066886530312	0.499065266559911	-2.28561060393128	0.0222770492631533	0.13053721511726	Hist3h2a	liver
641.315569589349	-0.270107363725197	0.163329268576947	-1.65375970931961	0.0981763453352495	0.321727440583779	Trim11	liver
585.737991103728	0.115709616039413	0.183026815268844	0.632200346541839	0.527255970909647	0.762733204670881	Iba57	liver
852.838860855091	-0.820636590913589	0.200633372116618	-4.0902297671426	4.30946055918346e-05	0.00139362393889723	Guk1	liver
234.393155153804	-3.57075291400593	0.911832748800771	-3.9160174041809	9.00237520338822e-05	0.00249535884093918	2610507I01Rik	liver
674.136519369902	-0.340836576364066	0.180207669908866	-1.89135443866752	0.0585770462128782	0.237259552190023	Mrpl55	liver
210.361995099885	0.0827635040369575	0.220830098907408	0.374783620740302	0.70782139664217	0.869419175169012	2310033P09Rik	liver
6994.66363309522	-0.0807001102407159	0.137585728861849	-0.586544192543019	0.557509873001497	0.782109167031539	Arf1	liver
62.3541220858378	-0.176669482122382	0.416903416200903	-0.423765973741136	0.671736495528532	0.850004211760623	Wnt9a	liver
4333.29002803955	-0.0934092669945808	0.135976464050765	-0.686951728349896	0.492113147965017	0.739460550839265	Snap47	liver
693.291798734388	-0.0224162547087294	0.181351714466173	-0.123606522136909	0.901626828175293	0.960383455192915	Jmjd4	liver
406.378463776113	-0.370323336191376	0.181634864153844	-2.03883399762786	0.0414665979770389	0.192867432321336	Zfp867	liver
1081.26854288415	-0.132554134060957	0.221582281835763	-0.598216305756823	0.549695612813479	0.777523600487497	Zkscan17	liver
80.5052252130658	-0.11487628350996	0.375619567999634	-0.305831466985958	0.759732968464961	0.898863360368648	4933439C10Rik	liver
60.3778799994073	-0.236680650755776	0.347817158231675	-0.680474338756248	0.496204164779156	0.742916751996671	Nlrp3	liver
5015.19788443247	0.303482124474671	0.13891172409744	2.18471210005134	0.0289099624355651	0.154571932488821	Mprip	liver
70.2507345464187	0.154630074749155	0.426197330679842	0.362813334617792	0.716744330078425	0.874568466828786	Pld6	liver
2006.74112535839	-0.147871756094678	0.201595236497613	-0.733508185330702	0.463248537327948	0.718339765926168	Flcn	liver
1908.17045517209	-0.0590466132540518	0.157436780022665	-0.375049675466885	0.707623522847866	0.869264881023162	Cops3	liver
311.122853801247	-0.273848003085977	0.212254687726442	-1.29018588950515	0.196986124166132	0.468606500636458	Nt5m	liver
311.297826318451	-0.224639483732294	0.182033930787578	-1.23405280960742	0.217183226441086	0.492414329908542	Med9	liver
13605.1054843253	-0.195865059854817	0.144036835343788	-1.35982618187442	0.173884935068721	0.43841561242651	Pemt	liver
524.192721319899	-0.0961333305952168	0.226765472762347	-0.42393283873496	0.671614794244337	0.849939614428716	Rai1	liver
10609.5681330312	0.262345849564518	0.28209725277463	0.929983709462455	0.352379519160941	0.62839098955027	Srebf1	liver
1999.64236089175	0.552779493468181	0.198238174237037	2.78846138285763	0.00529590608550848	0.0508052234518876	Tom1l2	liver
920.048833743063	-0.0616766405281431	0.146418592589801	-0.421235031953445	0.673583465738505	0.850968669521715	Atpaf2	liver
1879.82990748521	0.169327924554025	0.121147328161212	1.39770250920184	0.162202420460588	0.423734010454046	Gid4	liver
1473.84580553508	-0.127176605806139	0.133014190758297	-0.95611306644142	0.339015114036402	0.61425430861489	Drg2	liver
5313.42183791238	0.327841065810695	0.129298908097333	2.53552849467147	0.0112277793635951	0.0835313455436297	Alkbh5	liver
417.6568226404	0.29404175621254	0.211609901542037	1.38954630227512	0.164666691378996	0.427018818126605	Llgl1	liver
2976.17288788665	0.247340902817089	0.165606666965349	1.49354435633224	0.135294752461941	0.385426159021415	Flii	liver
872.296361695047	-0.127414342578348	0.195000439578602	-0.653405412078516	0.513494950658093	0.754877309392435	Mief2	liver
415.281141512285	-0.0359906446759679	0.172998633452417	-0.208040051864728	0.835197694584646	0.933515587276158	Top3a	liver
2343.2771978333	0.0895454221797344	0.143474985771597	0.624118704024722	0.532549631231472	0.76661147106792	Smcr8	liver
11794.4418511116	0.0941909084677818	0.181647554573848	0.518536617180216	0.60408391881248	0.810159369377273	Shmt1	liver
1226.88271771166	-0.1595184585924	0.145984051915866	-1.09271154279465	0.274520470158602	0.553086795512976	Dhrs7b	liver
828.658924888732	-0.198466585555536	0.14528727687586	-1.36602866970323	0.171929964943133	0.436933977871296	Tmem11	liver
460.952287248023	0.602092951627241	0.231524458439367	2.60055873010463	0.0093072086400854	0.0741494834041241	Natd1	liver
48.7738410378705	-0.907293649441424	0.409357958285476	-2.21638209561496	0.0266653448471037	0.146343110634424	Map2k3os	liver
3285.42030908117	0.159178751165597	0.151857535863638	1.04821107665367	0.294541368316663	0.573911995602439	Map2k3	liver
1536.29248064612	0.155644878264678	0.146937499487941	1.05925906461646	0.289481812300478	0.568287565596401	Usp22	liver
15129.3530290848	-0.0789036353402954	0.152882632239751	-0.516105944699842	0.605780416213318	0.810537026698501	Aldh3a2	liver
4392.73346603988	-0.416648849312121	0.211223263065776	-1.97255190202404	0.0485466374891453	0.213222361808842	Slc47a1	liver
96.9963277937056	-0.48805394833385	0.328238475881583	-1.48688829675752	0.137044315746051	0.388190044366609	Mapk7	liver
533.110335147994	-0.071234261115825	0.192961691086125	-0.369162711597665	0.712006447745183	0.871962623964921	Epn2	liver
202.136067183297	-0.301014718964882	0.274661467405967	-1.09594812045464	0.273101478759159	0.551706261876185	Grap	liver
88.5599099823963	-0.440799709820821	0.404829702439173	-1.08885219430522	0.276219070539966	0.555060279874279	Fam83g	liver
317.513054556663	0.04569995419017	0.184660637833933	0.247480755651177	0.80453618314369	0.922703320337884	Prpsap2	liver
3486.44377152235	-0.0876729875807063	0.158012725103681	-0.554847639790904	0.578998878557199	0.796807045442008	Ulk2	liver
753.597677160924	0.152449804672146	0.153035125071249	0.996175254544795	0.319165000423837	0.597704680353063	Akap10	liver
85.5071142907075	0.43847729869661	0.38557534016437	1.13720265022573	0.255453579326843	0.534005653835367	Specc1	liver
252.942239192075	-1.00802472361801	0.238973836223341	-4.21813843535542	2.46327574792597e-05	0.000900828551567866	Zswim7	liver
800.44744050025	-0.0140646212298074	0.145187486037477	-0.0968721314327113	0.922827940589246	0.970040924989195	Ttc19	liver
6548.13181114473	0.228233610878578	0.148377643129708	1.53819407064622	0.124001170328257	0.365688632453196	Ncor1	liver
208.814011941916	-0.515347137362564	0.22093627469148	-2.33256009264303	0.0196712455207315	0.120124407926091	Pigl	liver
615.784694672927	0.0974721093800341	0.180134795355475	0.541106504091473	0.588434175459148	0.801325749404465	Cenpv	liver
124.359037793422	0.120560949202819	0.285978907274049	0.42157287176179	0.673336810925386	0.850955125058556	Ubb	liver
36.0861580971495	0.0653436665803525	0.460417630082001	0.14192259876911	0.887141143761086	0.953814145264221	Gm1821	liver
82.9117271842642	-0.228444221553277	0.332134106712886	-0.687807174680666	0.491574217404118	0.739112340378895	Trpv2	liver
297.189106099497	-0.643833999508221	0.233012962373679	-2.76308233219968	0.00572583213222749	0.0536044829188302	2410006H16Rik	liver
42.9965495914525	-0.0745024724813982	0.450087082627762	-0.165529017288004	0.868527612355529	0.946904916926437	Mmgt2	liver
1360.22861965204	-0.298482736360907	0.138106032172502	-2.16125777900915	0.0306754323980715	0.160795403812113	Tvp23b	liver
134.298440577504	-0.0462625134900087	0.269357001897645	-0.171751664757497	0.863632766663402	0.944757859685435	Pmp22	liver
4164.41947344648	0.548364175382316	0.145778494514062	3.76162600121667	0.000168812342613382	0.00406162496327798	Hs3st3b1	liver
584.05428846461	0.201133455151529	0.191519817097179	1.05019657077822	0.293627745855943	0.572781219822766	Cox10	liver
56.4801233196131	-0.856383078476249	0.364149356952513	-2.35173579775928	0.0186860419702254	0.116331670013514	2810001G20Rik	liver
1269.00512644316	0.0775496742667952	0.139331427167271	0.556584223986271	0.577811534961076	0.795998633812412	Elac2	liver
39.0255642971581	0.905288068694248	0.436532904179614	2.07381404706611	0.0380965840756708	0.183541011786271	Arhgap44	liver
2934.79729436407	0.484640723974101	0.116286818064525	4.16763251450551	3.07779593083527e-05	0.0010669017722312	Map2k4	liver
243.024388634332	0.0636290083331547	0.202394915848126	0.314380467841894	0.753232089087238	0.896441056913602	Zkscan6	liver
1001.52610782284	-0.250747025435511	0.155082080232401	-1.61686653325613	0.105907093843776	0.334383279127614	Tmem220	liver
906.756467087196	-0.0397266351801612	0.143993982071031	-0.275890940779485	0.782631832194648	0.912046976780163	Adprm	liver
598.514535006545	0.147804611382867	0.162728774791935	0.908288110519175	0.363726022485594	0.638218210399897	Sco1	liver
584.379586471875	-0.641343360292787	0.327790974736887	-1.95656198529439	0.0503989881058553	0.217454344466418	Gas7	liver
677.736867109188	-0.0791632596131659	0.163072627938931	-0.485447868313077	0.627358683885938	0.824012350383161	Stx8	liver
400.182921119539	0.079953451826003	0.191746668868298	0.416974398032016	0.676697134197421	0.852783000669912	Ntn1	liver
53.787451594121	0.170519974723765	0.377249772721634	0.452008157602228	0.651263105683608	0.83784951568391	Pik3r5	liver
58.4251817194871	0.106716297570795	0.375961554589365	0.283848963459451	0.776526129623578	0.908540103031672	Pik3r6	liver
991.740346369245	-0.159738432679418	0.211409785113834	-0.755586751074018	0.449897001899901	0.708656863981264	Myh10	liver
1334.9847328605	-0.134450851284753	0.134988068368403	-0.996020262456205	0.319240300214094	0.597737091295805	Ndel1	liver
419.191389656863	0.0837949076695035	0.246072946797486	0.340528728411844	0.733458391942401	0.885046867178433	Arhgef15	liver
54.2331640677967	0.100105975905079	0.410394130397841	0.243926431910794	0.807287797676305	0.924129051864683	Slc25a35	liver
507.042847553195	0.18188251667605	0.155758459276048	1.16772159612662	0.24291908265776	0.520077694318003	Pfas	liver
383.823957880302	-0.0162089695020193	0.192734630919825	-0.0840999327659076	0.93297697810118	0.97491919895687	Ctc1	liver
310.054655186632	-0.353973965219913	0.191775715927586	-1.84577053203949	0.064925531031329	0.252034249211645	2310047M10Rik	liver
33.0605426500249	-0.652920750222208	0.514483387236836	-1.26908033654669	0.20441241267006	0.477054919857134	Tmem107	liver
812.890399215279	0.342593638851214	0.145259359565224	2.35849614012228	0.0183491506101359	0.115651376038929	Vamp2	liver
591.215625412322	2.82723475243768	0.625713263064866	4.5184190895832	6.23030726923215e-06	0.000318938708293033	Per1	liver
316.405960645483	0.0889316502574439	0.178172136968285	0.49913332000544	0.617685465569779	0.818725887043239	Cntrob	liver
1229.46584690012	-0.120994837938484	0.211521211374419	-0.572022243784846	0.567306905151752	0.789377192295406	Trappc1	liver
4145.6613991577	-0.4665112202096	0.155378380409262	-3.00242040740046	0.0026784200287712	0.0313351737355271	Chd3	liver
181.540629379326	-0.0715231657175209	0.2271820812169	-0.314827495788433	0.75289263390743	0.896229802682206	Cyb5d1	liver
565.855007155372	-0.562460125401651	0.191386086824001	-2.938876773832	0.00329404011676378	0.0362887386489636	Naa38	liver
85.6448325327256	0.0906486981478534	0.36597971954379	0.247687763302434	0.804376000382933	0.922703320337884	Tmem88	liver
979.575740091232	0.281215791360732	0.186099688052214	1.5111029701556	0.13076221809843	0.378232624122171	Kdm6b	liver
333.420562195869	-0.167190175824621	0.190019871307738	-0.879856273314996	0.378937175238765	0.650724869534684	Wrap53	liver
810.500618469909	0.177385837590761	0.138645648657962	1.27941871459934	0.200749647058667	0.47332498649006	Trp53	liver
405.19869730669	-0.384145609601468	0.200125356817301	-1.91952492033363	0.0549179355786107	0.228999225306997	Sat2	liver
1666.33134621202	0.0657638589615007	0.143509569409361	0.458254172402325	0.646769844326419	0.834859914506204	Fxr2	liver
2263.36000208469	0.0337577001184277	0.143768405540562	0.234806110504602	0.814359224826744	0.925988083734539	Mpdu1	liver
454.052934644104	-0.0352590035274176	0.238460989636649	-0.1478606776779	0.882452721689192	0.951928465021608	Cd68	liver
5562.23301137716	0.14634917452863	0.164168282335369	0.891458279557695	0.372683364053602	0.646020298208189	Eif4a1	liver
1386.57964002671	-0.0265151436454744	0.148544105139328	-0.178500140551551	0.858330210823944	0.943245860620448	Senp3	liver
169.133756410251	-0.74505397898333	0.262384586004333	-2.83954934369135	0.00451773073912425	0.0453658604270991	Tnfsf12	liver
2830.36599445984	1.01527225339312	0.181168286360585	5.60402857359034	2.09426160442439e-08	2.68020926608781e-06	Polr2a	liver
1043.12967402181	0.342977504789694	0.19030557264595	1.80224625070638	0.0715066708977559	0.267316734275949	Zbtb4	liver
97.5734971287692	0.344250330042244	0.320422238275958	1.07436466299747	0.282659273828388	0.561530771144074	Nlgn2	liver
2584.59479873872	-0.483048830838084	0.155870900554449	-3.0990315005548	0.00194154375901305	0.0252232952709795	Tmem256	liver
296.669498469971	0.3682161290634	0.23674566730964	1.55532362322732	0.119869013939459	0.358266891351972	Plscr3	liver
54.4561194374293	-0.353791855532637	0.41648676406052	-0.849467224560412	0.395621360351337	0.664803040232796	Kctd11	liver
111.481328875582	0.030338176280371	0.290968860825206	0.104266058554616	0.916958212415125	0.967291497330508	Acap1	liver
1214.39868365884	0.892013552099465	0.149549518521424	5.96467017024651	2.45128685351856e-09	4.40134042504899e-07	Neurl4	liver
529.708110951114	0.286056702926718	0.170191022390085	1.68079784062325	0.0928021882386299	0.311672340734427	Gps2	liver
9454.89504594815	-0.423494042816327	0.14337767808473	-2.953695780776	0.00313993369735613	0.0350402619473045	Eif5a	liver
999.333550933235	-0.065215203983162	0.169559483759548	-0.384615490311609	0.700522315783042	0.865554126557117	Elp5	liver
1417.47582620447	0.342830131688285	0.145725249432464	2.35257879484481	0.0186437392958094	0.116329970813582	Ctdnep1	liver
9388.43586792292	-0.0630896644029441	0.155749168858596	-0.405072238043355	0.68542441246327	0.857512245310057	Gabarap	liver
875.171681838156	0.193731309953171	0.179150412035168	1.08138913973104	0.279524050530579	0.558046144373899	Phf23	liver
212.083804999453	-0.269484625543808	0.211467758465108	-1.27435325129373	0.202538252119016	0.475421497169123	Dvl2	liver
26065.4700293051	0.0900937409008715	0.116098291989086	0.776012629964797	0.437741528607349	0.699525848717643	Acadvl	liver
25227.3763996935	-0.183146354814189	0.135843998960752	-1.34821086110034	0.177590572302413	0.442869139695704	Asgr1	liver
9760.39017993615	-0.130706051317694	0.145739219234786	-0.896848851009188	0.369799576636888	0.643907333006797	Asgr2	liver
245.580130202458	-0.286693223999196	0.438847608131236	-0.653286513785582	0.513571585100834	0.754877309392435	Slc16a11	liver
98.6792774010138	0.288852791737269	0.520953477990221	0.554469456373782	0.579257603344426	0.796942928663478	Slc16a13	liver
90.7092412164072	0.409488460530148	0.330132614039644	1.24037566455332	0.214836477748163	0.489121124635543	Bcl6b	liver
472.479719673592	-0.274763885611701	0.177836381334709	-1.54503754265311	0.122337182725489	0.362372298293635	0610010K14Rik	liver
1906.57942827827	-0.057523656045691	0.143411963008825	-0.401107793511976	0.688340763152717	0.858199560097878	Rnasek	liver
38.4992043438586	-0.763684986311832	0.521024601224086	-1.46573690477886	0.142719976016386	0.396927064186328	Alox12	liver
552.265347403613	0.0388666552690566	0.167354346881441	0.232241683549402	0.816350303875686	0.926606940834165	Pelp1	liver
687.725259485126	0.146952412300666	0.177644701112529	0.827226544784913	0.408108668835095	0.676521828441955	Arrb2	liver
329.605864855555	-0.604937281890358	0.198702301667566	-3.0444402345295	0.00233113742615773	0.0286451309874132	Med11	liver
378.957652245629	-0.0623271515290201	0.265882849994302	-0.234415839646505	0.814662162926241	0.925988083734539	Cxcl16	liver
142.016114514903	-0.0997944457653797	0.272283834150392	-0.366508889801587	0.713985380316055	0.873223975633193	Zmynd15	liver
163.037855619	-0.517546853071704	0.23452298651583	-2.20680650865228	0.0273275801587848	0.148600479710705	Vmo1	liver
2678.77456812363	-0.0139335430115152	0.115730057697045	-0.120396924435915	0.904168727625928	0.961297267786313	Gltpd2	liver
5131.6896901576	-0.139086157178848	0.11761027286266	-1.18260211283811	0.236966874769218	0.513919506665531	Psmb6	liver
368.88625713543	0.0646753177535663	0.244698630601472	0.264306006104708	0.791544132591547	0.916495392756324	Pld2	liver
3249.15840492549	0.437409153680852	0.143941639829533	3.03879512696165	0.00237526324522436	0.0288613816022	Mink1	liver
3457.88722074528	0.0252551649167458	0.128311329067527	0.196827241213086	0.843962732688336	0.938170510950479	Slc25a11	liver
2628.57408486316	0.45294501556741	0.135265574896845	3.34856090260091	0.000812324250432659	0.0134234350723968	Rnf167	liver
5408.38658366676	-0.0132145078717898	0.144080703192714	-0.0917160145596651	0.926923673243215	0.9716705985636	Pfn1	liver
159.826189416383	-0.0921934482035471	0.231073951463737	-0.398978109040625	0.689909334351322	0.859439711323019	Eno3	liver
1318.16238137004	-0.103157615114721	0.138592163753568	-0.7443250204113	0.456679867928701	0.714230214662282	Spag7	liver
1651.64626058693	0.391665426033748	0.181289069178133	2.16044700217916	0.0307380821710901	0.16082809828667	Camta2	liver
1048.95009645008	0.0030358834976718	0.18596359706363	0.016325149360458	0.98697499392521	0.995181855752765	Inca1	liver
10827.8869555837	-0.0761032226101534	0.137579368581855	-0.553158685016604	0.580154754760396	0.797485108208271	Kif1c	liver
99.2958463248688	0.0752667280762677	0.27519224810617	0.273505989337423	0.784464288974764	0.912767714127711	Zfp3	liver
56.642726388883	-0.161544933807871	0.43914898930036	-0.367859058642581	0.712978329376202	0.872546215910042	Scimp	liver
3578.85610809594	-0.00540543146088124	0.135448453645296	-0.0399076646163612	0.968166740492386	0.990058303988729	Rabep1	liver
1640.66829526695	-0.0685938183387997	0.130973836459078	-0.523721532431643	0.600472236885079	0.809285347269494	Nup88	liver
562.540489719025	-0.537732328806537	0.222013175911673	-2.4220739449287	0.0154322099941883	0.103347247346288	Rpain	liver
2550.52610445458	-0.163492246665194	0.12670199736056	-1.29036834518038	0.1969227973803	0.468606500636458	C1qbp	liver
1486.53014720335	0.649047226010139	0.190922434250285	3.39953357790989	0.000675008911707818	0.0117347447081191	Dhx33	liver
5642.57022150231	0.0883294828171513	0.169663800962175	0.520614782388635	0.602635149486755	0.80975861797472	Derl2	liver
911.748719745796	0.0902687450236928	0.185666625188404	0.486187245187943	0.626834413764091	0.823546468732017	Mis12	liver
50.9584409014783	0.188091514833708	0.378531801853285	0.496897523306668	0.619261318139532	0.820091772040793	Nlrp1b	liver
227.1487993819	-0.145543605349666	0.231577807879227	-0.628486842856591	0.529685063086796	0.764121384328052	4933427D14Rik	liver
2137.71521909418	-0.264982500384323	0.135869642771173	-1.95027008962258	0.0511439356961515	0.218992804180959	Txndc17	liver
144.161519518569	-0.192372541195803	0.25894999779386	-0.742894546571665	0.457545527631928	0.714946920684981	Med31	liver
129.351513495171	-0.170239113233608	0.489285093449148	-0.347934395535189	0.727889453318952	0.881379982227176	Slc13a5	liver
591.101811875492	-0.372424665485905	0.214796772874599	-1.73384665189235	0.0829452956063361	0.290793213155693	Xaf1	liver
981.471598786639	-0.666685226625862	0.147445528497463	-4.52156964961696	6.13827558456465e-06	0.000315570321719285	Ggt6	liver
2169.67941500407	0.0983842390597374	0.180393894144359	0.545385638058272	0.585488316010744	0.799662175477889	Mybbp1a	liver
1569.10439570058	0.0298250543847706	0.181569609958167	0.164262369631362	0.869524603947385	0.947069351334273	Spns2	liver
2687.42267980221	0.133823116225061	0.162712090049558	0.822453427918617	0.410818882202042	0.678773678463202	Ube2g1	liver
2741.81867013085	-0.0162124582349702	0.127739150973233	-0.126918474965967	0.899004923983106	0.95937454408913	Ankfy1	liver
618.142998899973	-0.141978151885026	0.153379169882446	-0.925667755235874	0.354618669959898	0.630521933950771	Cyb5d2	liver
2836.2783581806	0.308110598605973	0.147060418283141	2.09512935025628	0.0361594954986007	0.178650266306268	Zzef1	liver
87.373380545243	-0.244528224452247	0.375165402720868	-0.651787778613962	0.514538086786259	0.755325586825955	Atp2a3	liver
864.421628741955	-0.145412924419486	0.167224426587518	-0.869567487160037	0.384536812125349	0.655330478802656	1200014J11Rik	liver
2307.0789535532	-0.0966938511937268	0.140137868359698	-0.689990880591522	0.4901999222281	0.73889300393485	Emc6	liver
103.828946534992	0.175770342454905	0.270079245535199	0.65081025425183	0.515168980012383	0.755708985121957	Tax1bp3	liver
964.898960949507	0.0446259856896539	0.156466211326877	0.285211646087759	0.775481998470861	0.907936587990701	Ctns	liver
3013.14656343912	-0.100210851816736	0.153810678136569	-0.651520772359888	0.514710372474987	0.755486308061749	Shpk	liver
561.117340303516	-0.376957968346964	0.231704205782447	-1.62689307720594	0.10375980853527	0.331316054332848	Aspa	liver
385.201908005141	0.225610143469194	0.188113422708113	1.19933038387836	0.230399505162303	0.50731667467463	Spata22	liver
57.0969989615769	-0.331694004393757	0.45211804069936	-0.733644700133344	0.463165310104322	0.718303297738172	Rap1gap2	liver
17286.5590532316	0.0795260686774078	0.133114672940904	0.597425264401266	0.550223490199922	0.777721605816597	Cluh	liver
5184.16949723955	0.383015654243179	0.124422073747914	3.07835774397386	0.00208144879340375	0.0265815594316848	Pafah1b1	liver
721.892822637012	0.169347041129777	0.156375024355836	1.08295453079785	0.278828605704041	0.557842695263532	Mettl16	liver
572.330299221902	-0.13964388769121	0.185499161084851	-0.752800642733552	0.451569720494399	0.710067155544429	Mnt	liver
613.885426197185	0.317603070676269	0.194386843335498	1.63387122927918	0.102285892004317	0.32892255568349	Sgsm2	liver
666.867394242891	0.158169744480002	0.157577585343406	1.00375788939338	0.31549532646241	0.594425806944839	Tsr1	liver
3276.02691382665	-0.23583250017337	0.169197456879381	-1.39383005231274	0.163368930764024	0.425303665243716	Srr	liver
1754.66498532577	0.209955473841011	0.142974281562276	1.46848420252113	0.141972744257529	0.396363915854739	Smg6	liver
87.6696430019203	-0.592624170129628	0.37697552444919	-1.57204946128937	0.115939080836009	0.353279418048932	Hic1	liver
392.82246772626	0.0174457489685654	0.166754227476098	0.104619530386814	0.916677716743729	0.967291497330508	Ovca2	liver
669.334001613349	-0.29480250071688	0.163242894279753	-1.80591321917921	0.0709318959114213	0.266659596191999	Dph1	liver
1073.37535240172	0.7638402495621	0.217504636466915	3.51183433130304	0.000445025319232049	0.00863345909385322	Rtn4rl1	liver
1788.73732412798	0.243867669524255	0.169629039181863	1.43765283763	0.15053258096838	0.408257303787942	Rpa1	liver
189.411219406432	-0.343598784846802	0.25088062454203	-1.36957082865217	0.170820910898943	0.435226390257522	Smyd4	liver
25750.2629507756	-0.171223480350923	0.118144324275087	-1.44927385552815	0.147261119312622	0.402367917147811	Serpinf1	liver
51658.8493893763	-0.134979833940554	0.171685427039042	-0.786204375458486	0.43174776313637	0.694804283600939	Serpinf2	liver
3053.67373181179	-0.189946982583659	0.162513295643034	-1.16880887703418	0.242480643034892	0.519380486300168	Wdr81	liver
1887.90562246154	-0.900866636521885	0.161842812342644	-5.56630611815262	2.60195985207304e-08	3.22696670313801e-06	Mir22hg	liver
4091.77320246727	-0.886410959873069	0.214867073528732	-4.125392249802	3.70103428332426e-05	0.00123333635535709	Tlcd2	liver
14589.7845160046	0.271261348895634	0.137494631094973	1.97288684463805	0.0485084557635501	0.213222361808842	Prpf8	liver
917.053443085795	0.0847460305703119	0.140426468017567	0.603490437142593	0.546182475290558	0.774740617585829	Rilp	liver
559.388591800404	0.11269179204153	0.233146636007109	0.483351567800848	0.628846130687476	0.82497480394442	Scarf1	liver
821.87714850723	0.630286411526554	0.236363370243549	2.66659935876319	0.00766229535271535	0.0650101854716379	Slc43a2	liver
2328.2086041049	0.250820936636469	0.120273216875837	2.08542635801787	0.0370306163397816	0.18116238900674	Pitpna	liver
1118.67918838786	0.446903582037989	0.146283385452277	3.05505359105724	0.00225020310079789	0.0280808540483388	Inpp5k	liver
2027.24913021996	0.203940156179744	0.180339343818905	1.13086890448342	0.258110272971455	0.535910697936936	Myo1c	liver
4812.338859274	0.115609034089784	0.12492084291129	0.925458325412372	0.354727551868563	0.630521933950771	Crk	liver
8942.6064912285	0.16662673551099	0.122421021861544	1.36109577405293	0.173483424973506	0.43841561242651	Ywhae	liver
127.089753568927	0.256066307359752	0.283304392570147	0.903855761065723	0.366071889631372	0.64083888711662	Rph3al	liver
1477.10926804713	0.25060075251934	0.137464615467353	1.82302006714489	0.0683003516451668	0.260428916098687	Vps53	liver
64.6868192463788	-0.272397061719023	0.391470573115526	-0.695830237126499	0.486535150695187	0.736136066263753	Fam57a	liver
406.799883737519	0.0211635205430729	0.253124334965525	0.0836091897128552	0.933367160188586	0.975065354906967	Gemin4	liver
3217.35655384741	0.0130389833747428	0.126420531431033	0.103139760821651	0.917852048705987	0.967845248539259	Glod4	liver
318.135959709277	0.152335849346104	0.23297777521475	0.653864297595282	0.513199237435902	0.754649410384293	Rnmtl1	liver
83.5235802919565	0.648659191479405	0.419089350972162	1.54778256707003	0.121674655067917	0.361263424206727	Nxn	liver
576.758002470963	-0.216665047361386	0.179061072636	-1.21000641944008	0.226276429627989	0.502349872234094	Timm22	liver
241.477755254706	0.100408167966006	0.191965826372042	0.523052305004583	0.600937854930765	0.809431381807393	Abr	liver
2025.76145049891	-0.0167902491681769	0.123744524855606	-0.135684784339096	0.892070476808304	0.955711548919465	Gosr1	liver
2390.72738617189	0.63358369983258	0.208359699474994	3.0408169210698	0.00235937244582538	0.0288154827647506	Cpd	liver
2413.49171658857	-0.283188637329119	0.135145628700299	-2.09543320085568	0.0361325007330206	0.178650266306268	Blmh	liver
491.679275112344	-0.0115391344838784	0.166647047836866	-0.0692429576980824	0.944796229843904	0.980098513092821	Ccdc55	liver
1851.52836818911	0.282647750968167	0.156791291318063	1.80270057470727	0.0714352518887285	0.267316734275949	Ssh2	liver
92.7116324457907	-0.290586889096061	0.369636087265765	-0.786143180027581	0.431783609659237	0.694804283600939	Ankrd13b	liver
528.18626770648	0.168112427298369	0.206686518506302	0.813369098832847	0.416006470684642	0.683402682279973	Git1	liver
96.3726585327759	-0.286892851973604	0.376612860241769	-0.761771257066027	0.446196538014995	0.706364482842468	Trp53i13	liver
1910.43251723583	-0.269878628862864	0.202562823960254	-1.33232062817123	0.182754851466527	0.449599358515813	Abhd15	liver
3689.5239025719	0.220701941676001	0.123973656305149	1.78023257725629	0.0750379060157443	0.274927831649747	Taok1	liver
2835.26120719751	0.206013857289411	0.161610244692117	1.27475741208045	0.202395118901079	0.475321160456015	Nufip2	liver
5486.19386857733	0.406907852262765	0.173033731651578	2.35160999175652	0.0186923622723293	0.116331670013514	Myo18a	liver
15613.4547886877	-0.152464757340913	0.128830415986943	-1.1834531168196	0.236629616741639	0.513810250587875	Pipox	liver
1183.61627222701	0.225820597925536	0.155588262799999	1.45139867147831	0.146668879476018	0.402102693732109	Phf12	liver
162.145646693153	-0.16792545113679	0.262736910451356	-0.639139170999274	0.522732399555877	0.759855538235263	Dhrs13	liver
1964.84255419218	-0.264971825766395	0.158007297385255	-1.67695941992058	0.0935504174189514	0.312962047149607	Flot2	liver
773.209302319641	-0.038481820189968	0.16337953231321	-0.235536359084414	0.813792462030173	0.925792304834522	Eral1	liver
865.59699677918	0.240950059157664	0.176377354868819	1.36610541266407	0.171905879666305	0.436933977871296	Fam222b	liver
1802.84192224668	-0.268295918495663	0.154894613883188	-1.73211909549028	0.0832523599397887	0.291146317991012	Traf4	liver
299.533566656691	0.155608874008661	0.205287607263127	0.758004226768595	0.448448452369906	0.708060423389158	Nek8	liver
1292.66387081351	0.0698724235748755	0.151396493463342	0.461519431371732	0.644425983634462	0.83387564262865	Tlcd1	liver
3056.70913079991	-0.281449879104098	0.155357416690211	-1.81162821254501	0.0700436626387858	0.264559588744751	Rpl23a	liver
43.80282796259	0.194406836564714	0.39371502242751	0.493775511450056	0.621464729610633	0.820696309916806	Snord4a	liver
138.725634764661	-0.124706780824941	0.238427778346038	-0.523037968520386	0.600947831389292	0.809431381807393	Rab34	liver
114.853209942081	0.0408048814411654	0.307656176191628	0.132631439245833	0.894484867148059	0.956672559725386	Proca1	liver
2977.2754634619	0.488199891878288	0.137106723805854	3.56072903156514	0.000369826574851911	0.00749610399753411	Supt6	liver
1776.39489554967	0.0231916355348581	0.134326535429394	0.172651185119327	0.862925616075219	0.944725776463888	Sdf2	liver
11675.7498481782	0.26969271946045	0.130752940959816	2.06261302790378	0.0391494089763895	0.185980317274272	2610507B11Rik	liver
816.843432678147	-0.489648145072844	0.232917969184867	-2.10223430500637	0.0355327561306847	0.176782074545962	Aldoc	liver
1172.02504604744	0.705698649469283	0.174710076328522	4.03925557300025	5.36211137944318e-05	0.00163721319529699	Pigs	liver
193.982797052451	-0.144861888632174	0.302355741469701	-0.479110758499324	0.631859836472666	0.826637706682518	Unc119	liver
218.527111399361	-0.33582232909726	0.280716206280241	-1.1963054557741	0.231577380498061	0.508209058243614	Slc13a2	liver
2219.46645543525	-0.0938137087776183	0.142470241048307	-0.658479329348571	0.510230175174671	0.752675537382133	Slc46a1	liver
140302.019711179	0.0775559509739933	0.168482652204712	0.460320097998934	0.645286477291319	0.834171107007798	Vtn	liver
38.4067696060961	0.0953994390807851	0.532865907266802	0.179030855192279	0.857913474143152	0.943127433426538	Sebox	liver
424.16598197507	-0.200616159290161	0.161637992660785	-1.24114483227453	0.21455225032248	0.488837797609741	Tmem199	liver
4031.86687394967	0.086404531845856	0.134499117940787	0.642417089187869	0.520602406755165	0.75917139493594	Poldip2	liver
1982.78662050277	0.120399794481767	0.144216197534966	0.834856254288465	0.403798647885749	0.672904520579798	Tnfaip1	liver
1379.48696787744	-0.545824400866027	0.19877571332383	-2.74593103824918	0.00603394456085366	0.0555905626227228	Ift20	liver
2258.26954859224	-0.623603722183822	0.180305614651938	-3.45859291951405	0.000543004932621041	0.0100652532194624	Tmem97	liver
686.123154700108	0.324062258519935	0.157328111666306	2.05978610616819	0.0394189933926476	0.186697043509272	Nlk	liver
304.543998654106	0.0243411842274635	0.190003714488426	0.12810899141104	0.898062720566367	0.95894144467254	Fam58b	liver
327.999502372784	-0.40858037435285	0.21485115145795	-1.90169041022252	0.0572116403112108	0.234549997005555	Lyrm9	liver
28330.5852850292	0.169664287347271	0.129189975253044	1.31329297815059	0.189084243742832	0.458568019210606	Lgals9	liver
61.2237812481317	-0.215530909953716	0.452540619931094	-0.476268649622068	0.6338829971897	0.828003231417531	Ksr1	liver
1955.9609656385	0.291706913422347	0.235721526860501	1.23750646496948	0.215899115699677	0.490698349115269	Wsb1	liver
1590.15480956721	0.250852642053152	0.150443385079615	1.66742221281713	0.0954304800258608	0.316087190173763	Nf1	liver
78.2865208718631	-0.285221999957421	0.361028446276668	-0.790026389607112	0.429512356757891	0.693375422946515	Evi2a	liver
380.183787165627	0.949386938076303	0.249475216537923	3.8055360819057	0.000141497383802222	0.00356858181790509	Rab11fip4	liver
1899.6121528538	-0.0553574213075635	0.163691470479117	-0.338181465078998	0.73522644259545	0.885983582532632	Utp6	liver
1792.25027160772	0.277690594810727	0.142543666254963	1.94810896973866	0.0514019257703034	0.219824090656506	Suz12	liver
417.885334970775	-0.105915744073962	0.165564334933043	-0.639725603444704	0.522351006979486	0.759656989115476	Crlf3	liver
127.78579021263	-0.863422765337939	0.273354384084426	-3.15862051464764	0.00158517753753322	0.022174053228517	Atad5	liver
569.028608446471	-0.22045482689522	0.163446466448461	-1.34878918881207	0.177404688235462	0.442683758446921	Tefm	liver
1280.96338914184	-0.0467904718531653	0.186008170704693	-0.251550626383235	0.801388425947873	0.921497109936237	Adap2	liver
445.251047132732	-0.248664286716153	0.214546659174975	-1.1590219473581	0.246447239084001	0.524434250713462	Rnf135	liver
2437.88007481498	0.0987848594258263	0.120889782942022	0.817148124694728	0.413843783720053	0.680965766400252	Rhot1	liver
1150.78446007553	-0.153154650911717	0.150690656937861	-1.01635133872216	0.309462109246633	0.588496549831963	5730455P16Rik	liver
4000.28973292626	-0.0379830451139239	0.132816039955829	-0.285982364227664	0.774891629019676	0.907598704810311	Zfp207	liver
3506.2524015311	0.0476300478544191	0.125777675851361	0.378684432925175	0.704922214654964	0.867896248316366	Psmd11	liver
782.426589284891	0.084851735481827	0.165284736995818	0.51336703572317	0.607694599879622	0.812359096082368	Myo1d	liver
410.217859103135	-0.0308936360856135	0.284913444666889	-0.108431654117739	0.913653292800532	0.9661787194436	Tmem98	liver
34.3334855242218	0.245833670680091	0.654727998535251	0.375474504267523	0.707307604404838	0.86912494857086	Ccl2	liver
136.091173601192	-0.00874994023934523	0.305743289783783	-0.0286185847137743	0.977168789696597	0.992245730374269	Tmem132e	liver
39.7126077146562	-0.289226510869363	0.453552709079456	-0.637691066726039	0.523674801848695	0.760295421945427	Cct6b	liver
398.634796090605	0.0796479070782985	0.189549547095697	0.420195712934555	0.674342486314327	0.851063036662704	Zfp830	liver
91.7518010661889	-0.59984323843876	0.370569071000795	-1.61870832020267	0.105510035852876	0.333846852001605	Gm11423	liver
1618.04240405633	0.495911363831981	0.177534026237576	2.79333136493144	0.0052168221623929	0.0502468940060741	Lig3	liver
1658.33724441762	0.189664645279122	0.170109921220071	1.11495346020267	0.264870365757044	0.542916090650312	Rffl	liver
978.867938349491	-0.122990111184319	0.200013230888618	-0.614909876901138	0.53861423970965	0.769981971025768	Rad51d	liver
167.142103913068	0.1799703809549	0.285912938826467	0.629458679602226	0.529048812118607	0.763557269167834	Nle1	liver
43.9255861107699	-0.664865783780739	0.447990729108477	-1.48410612224912	0.13778076928844	0.389542339492347	Unc45b	liver
623.062698450986	-0.242637096619802	0.219779732345128	-1.1040012381068	0.269592600614203	0.54765264866411	Slfn5	liver
65.5556023054043	-1.73831271665469	0.472698023517251	-3.6774275122207	0.000235597996823982	0.00528693596352117	Slfn9	liver
45.5966089997214	-1.67583403731509	0.482036736433068	-3.47656912980486	0.000507873280152805	0.00950189045138141	Slfn8	liver
177.73871163849	-0.228043134302399	0.275769772109252	-0.826933033878909	0.408275018660731	0.676521828441955	Slfn2	liver
68.2240885944248	-0.553353207503913	0.409281850732401	-1.35201012826173	0.176372075263272	0.441422160846987	AI662270	liver
98.8903898107032	1.61269748985302	0.529799725696771	3.04397569804716	0.00233473999712074	0.0286601246585332	AA465934	liver
585.372882030707	0.0352690717841409	0.170826726807161	0.206461087461768	0.83643075761157	0.934025992208966	Pex12	liver
4195.38183930463	0.612325179187469	0.121761934688675	5.02887196029763	4.93373688759332e-07	4.14596763351537e-05	Ap2b1	liver
3014.90783865207	-0.0372166806208005	0.121242808630755	-0.306959901713791	0.758873893492956	0.898548517590576	Taf15	liver
4283.29160178316	0.111102309810563	0.235585250483514	0.471601297545312	0.63721140038388	0.830424996925369	Ccl9	liver
396.073590714179	-0.533248746714327	0.232072759037572	-2.2977653599921	0.0215751473043694	0.127856661118997	Ccl6	liver
680.798385599461	-0.279768878363791	0.19784278451335	-1.41409695103089	0.157333438254997	0.417682271654564	Wfdc17	liver
19932.2652280543	-0.382013009974402	0.195175442250086	-1.95728010435306	0.0503145453300551	0.217300575305251	Wfdc21	liver
664.93914486466	0.322762973684718	0.156566581345651	2.06150617143614	0.0392547753113579	0.186139119824846	Heatr6	liver
897.784532190733	0.505275709740268	0.151895325435545	3.32647307144864	0.000879525176595424	0.0143231168874075	Hnf1b	liver
1421.05346123581	0.0998313625949464	0.138389289033281	0.721380702887621	0.470675315985744	0.724440129389522	Ddx52	liver
1552.45269098106	0.815140525181907	0.168589077608793	4.83507316573272	1.33096671862986e-06	8.94498861738391e-05	Synrg	liver
34.2975000007328	-0.28597122438581	0.548223792081677	-0.521632275935964	0.601926386395899	0.809481982310593	Dusp14	liver
299.955469991364	0.0516991194864283	0.213085386303817	0.242621609971487	0.808298538996964	0.924299749545312	Tada2a	liver
381.677777568242	0.670802371613249	0.252078763220772	2.66108244519494	0.00778898825290934	0.0657093469021734	Gm11437	liver
2556.61109814957	0.811416075856752	0.251876141004589	3.22148843721554	0.00127526608094189	0.0189400629058406	Acaca	liver
556.75251059107	-0.0636854477431729	0.182543670546048	-0.348877874278899	0.727180996554849	0.881071669395871	Aatf	liver
123.732985634495	-0.192835402422606	0.246337235301017	-0.782810614022546	0.433738333738866	0.69661913735889	Mrm1	liver
972.924848229737	0.0285190629889974	0.158524557244153	0.179903123432627	0.857228623066533	0.942737919673571	Dhrs11	liver
4089.05047050094	-0.147411755659514	0.122059242466134	-1.20770662410439	0.227160129167456	0.503365891784193	Ggnbp2	liver
106.632417077495	-0.182962737437607	0.321453343138136	-0.569173540556346	0.569238375063282	0.790116263068107	Ggnbp2os	liver
211.979267600775	-0.0201986866311038	0.217731352456956	-0.0927688474956632	0.926087200351759	0.971216896541858	Pigw	liver
413.814630584831	0.332998090552746	0.208362791184546	1.59816485784072	0.110006292440887	0.341780913756165	Myo19	liver
234.918912282319	-0.21557712219455	0.222221172280584	-0.970101633350917	0.331995834941264	0.608573937843191	Znhit3	liver
2548.99934738673	0.351763768993141	0.133246664050967	2.63994428302228	0.00829196582968292	0.0687517837847826	Usp32	liver
893.169060686965	0.315367218030914	0.158762250591071	1.98641186337939	0.0469876104258431	0.208199246196277	Appbp2	liver
301.185260036486	0.353900293656584	0.184660724501284	1.91648925136825	0.0553028500592339	0.229569802005723	Ppm1d	liver
1119.21494616675	0.351575813549966	0.172336028432517	2.04005985717394	0.0413443643110937	0.192481696076802	Bcas3	liver
88.2138479022883	-0.619975884021187	0.397987173565991	-1.55777855468598	0.119285751359647	0.357500644956789	Tbx2	liver
204.154373892538	0.34201668676387	0.245250142210514	1.39456264400571	0.163147766555408	0.425020313316731	Brip1	liver
1004.56948396136	-0.450341459776993	0.18973365874571	-2.37354543602916	0.0176182252575615	0.112737898855566	Brip1os	liver
320.147776927569	0.538901273324106	0.257285006964858	2.09456928595032	0.0362092979131641	0.178743477183161	Ints2	liver
2530.71551949466	0.363116058116183	0.127369874680984	2.85087866362167	0.00435986032105582	0.0444861065838011	Med13	liver
2135.5041019699	0.0259677124887361	0.152661225023121	0.170100249652806	0.864931297182479	0.945576472655873	Rnft1	liver
2078.07625939814	0.32011406137111	0.119646175717175	2.67550600303189	0.00746165369168327	0.064116924222107	Rps6kb1	liver
178.235414332464	-0.127594597890285	0.244256332968764	-0.5223798963141	0.601405850532909	0.809445919877499	Tubd1	liver
6492.07931037969	0.000831566339891817	0.160066164839137	0.0051951412762811	0.995854895630185	0.998280119393711	Vmp1	liver
719.438855498341	-0.364315182917651	0.154486211419462	-2.35823753829046	0.0183619391716005	0.115651376038929	Ptrh2	liver
12448.7554504509	0.0798168696744238	0.140757305936178	0.567053121282489	0.570678091221647	0.791002963888122	Cltc	liver
1663.84805548887	-0.989130263882444	0.156429035548687	-6.32318840561147	2.56220580235323e-10	6.04379133378615e-08	Dhx40	liver
1823.77808442841	0.100915854204944	0.288151043461986	0.350218597137432	0.726174650994301	0.88036375884395	Ypel2	liver
36.2620112049666	0.109579370965282	0.473191684681986	0.231575013916245	0.816868116014101	0.926724907525166	Gdpd1	liver
614.176070915965	0.0646406195289897	0.156297068995202	0.413575378889376	0.679185107725631	0.853932280971288	Smg8	liver
48.4042070218091	0.130390260740727	0.393224219480238	0.331592649387355	0.740196870779972	0.887758876470226	Ska2	liver
773.092331464728	0.00903750529889335	0.173353358441833	0.0521334306997333	0.958422375329105	0.98488591885363	Trim37	liver
466.031665554299	0.243932721476783	0.16500995219593	1.47829096506338	0.13932991493539	0.39189592627373	Sept4	liver
3913.15340145496	0.565120949158119	0.182883577959357	3.09005847033301	0.0020011709563096	0.025761816078131	Mtmr4	liver
1086.23508489927	0.178431891171268	0.311395335603561	0.57300759121977	0.566639554074883	0.788966879111208	Rnf43	liver
42.2415414149869	0.00085928092563973	0.430995357870003	0.00199371271627224	0.998409248458854	0.999070494121534	1110028F11Rik	liver
742.814896477464	-0.212531998077023	0.195313823677788	-1.08815645546748	0.276526044270369	0.555453049352569	Supt4a	liver
90.8595722356543	-0.202664609216822	0.320459648429826	-0.632418497023976	0.527113450366264	0.762618738172718	Mks1	liver
9294.66400992568	0.0708900939944006	0.119256235513249	0.594435114351108	0.552221128398334	0.778989836408598	Dynll2	liver
4533.37524533081	0.165130055639023	0.192928396990312	0.855913687228297	0.392045523529534	0.663241126151075	Srsf1	liver
893.405262662917	0.131441165265118	0.168404337786265	0.780509379942103	0.43509110858139	0.69788613816455	Vezf1	liver
88.1937850338502	-0.378544237918137	0.331760324922658	-1.14101720272424	0.25386276431208	0.532699992093899	Cuedc1	liver
961.985652884963	-0.0890527234326378	0.137994008232843	-0.645337609748792	0.518708425129457	0.757748919770173	Mrps23	liver
960.667235610375	-0.357156142995689	0.186299077347158	-1.91711171134868	0.0552237411116561	0.229558260391577	Msi2	liver
6344.72228052586	0.250144986932676	0.168266829111889	1.4865971401074	0.137121243608782	0.388225126056402	Akap1	liver
2826.38483235275	0.337101979365738	0.161704597973488	2.08467776173568	0.0370985605892689	0.18134729129984	Scpep1	liver
210.209920566013	-0.0874651028026142	0.252213070244139	-0.346790524051546	0.72874869659157	0.881976541247141	Coil	liver
5036.32749067387	0.232930136876948	0.140667595758159	1.6558905099751	0.0977439938039778	0.320747475576065	Trim25	liver
120.156486376566	-0.245092255997232	0.3320633056145	-0.738088948261466	0.460460399176136	0.716294062158485	Dgke	liver
3927.9621858291	-0.807137573751949	0.16274730494834	-4.95945277869981	7.0692028441762e-07	5.49895658794607e-05	Pctp	liver
8502.77035303757	0.0493532533994319	0.155994092518056	0.316378989760265	0.751714862313723	0.895359385508325	Mmd	liver
2922.95031716581	0.734322567494261	0.19404064478805	3.78437501223704	0.000154095323834891	0.00380650255797482	Hlf	liver
197.708345433083	0.358123151243861	0.275555600006056	1.29964025857573	0.193724294766531	0.464901016634251	Stxbp4	liver
652.771142038792	-0.127406339648663	0.169078767872665	-0.753532458579387	0.451130013924977	0.709941448260618	Cox11	liver
1148.81635927114	0.459420472457028	0.159498237917407	2.88041095911624	0.00397157116287675	0.0415460879038325	Tom1l1	liver
473.35547826826	-0.383489722114559	0.212464334036783	-1.8049604600844	0.0710808696035446	0.26696936039046	Utp18	liver
998.592227073572	-0.0768727823497742	0.190404377333678	-0.403734322846248	0.686408097180797	0.857797071318818	Mbtd1	liver
5008.37026842011	-0.662886197560142	0.136894573068792	-4.84231173449828	1.28337211784754e-06	8.67357672904825e-05	Nme2	liver
2584.01490780848	-1.0335810350194	0.173971055154306	-5.94110919257605	2.83099956159047e-09	4.93578619216425e-07	Nme1	liver
6095.55181072131	-0.048158253214186	0.143562330854834	-0.335451876041789	0.737284241048872	0.886775586864421	Spag9	liver
4181.65548766739	-0.470431998402353	0.163645486468652	-2.87470194598047	0.00404409058536048	0.0421580673673193	Tob1	liver
2284.22324360223	-0.0801154547940219	0.180248817346212	-0.444471458806525	0.656701759412588	0.841293056950579	Luc7l3	liver
2650.07098913429	0.406571447317973	0.140602232785798	2.89164289401698	0.00383233273215971	0.0406910527518812	Ankrd40	liver
10632.0419968132	-0.542566452404711	0.128989630788596	-4.20627959850461	2.5960902097894e-05	0.000926152301489313	Abcc3	liver
366.469092408874	0.237178335680955	0.286223662375366	0.828646848106881	0.407304270354473	0.67603068051384	Rsad1	liver
6085.67348347067	0.0909034014877233	0.177890449532957	0.511007767569231	0.609345617728376	0.813335352963492	Acsf2	liver
113.368341870094	0.460382341435768	0.301376932255778	1.52759648188682	0.126612755805114	0.371228723454917	Chad	liver
3193.05116575559	0.0240764719235257	0.243182898686082	0.0990056128683843	0.921133813578175	0.969401663336448	Lrrc59	liver
930.474743869632	-0.395957536061354	0.18043581820684	-2.19445085790813	0.0282030131204134	0.151888670746055	Mrpl27	liver
990.962206919864	-0.0954190351781142	0.170561377745729	-0.559441043683195	0.575860756750229	0.794787704802162	Xylt2	liver
84.3804999326857	1.04487342175757	0.446280019741283	2.34129554436092	0.0192169481650507	0.118553787910544	Col1a1	liver
376.338452399035	-0.0535292101150811	0.203808202461908	-0.262645023450839	0.792824194258823	0.916871738114089	Ppp1r9b	liver
48.9063275059448	0.950304285135507	0.418302676160967	2.27181019700151	0.0230979767069719	0.133424240068313	Samd14	liver
4776.40456448693	0.15933336569773	0.134480768332182	1.18480410004916	0.236094911138032	0.513231257858786	Pdk2	liver
369.958521278653	0.169271571828373	0.198401882007632	0.853175232591098	0.393562135994628	0.664165864874914	Itga3	liver
1386.76552171683	0.229596968007194	0.157001324657177	1.46238873148704	0.143634715588223	0.397681387462904	Kat7	liver
95.1035436772528	-0.261140425912268	0.32518752968812	-0.803045633892304	0.421948359038761	0.688224978286629	Fam117a	liver
2513.46214476296	-0.0145500186264072	0.193387686577721	-0.0752375649344129	0.940025696545204	0.978075517163017	Slc35b1	liver
6110.94007840053	-0.321881330407727	0.128651542887361	-2.50196245753185	0.012350702093456	0.0886866728164961	Spop	liver
218.056254089429	0.000373537048316612	0.287017750434993	0.00130144232456179	0.998961599555589	0.999293866842985	Ngfr	liver
1465.53435482559	-0.130220870379643	0.132325341056628	-0.984096238406179	0.325068196272208	0.602553220516896	Phb	liver
686.474210129442	0.055151044932947	0.19437009819338	0.283742434898998	0.776607772271371	0.908547262513332	Zfp652	liver
77.2128337933907	-0.136489015466845	0.406836319545323	-0.33548876761884	0.737256416414977	0.886775586864421	Phospho1	liver
183.965010264943	-0.233605617727074	0.232700126343509	-1.00389123718063	0.315431040748534	0.594397778854146	Abi3	liver
226.262750885421	-0.0454571299198979	0.254302266226561	-0.17875235873596	0.858132154887058	0.943127433426538	Gngt2	liver
1111.79895841284	-0.00961836289864449	0.142390981084171	-0.0675489614960856	0.946144685364769	0.980098513092821	Snf8	liver
2733.08508188087	0.233078079838698	0.126686840347418	1.8397970870496	0.0657980332659225	0.253864765936192	Ube2z	liver
3388.39176316945	-0.091777239197816	0.154846096830235	-0.592699726221937	0.553382124701843	0.779868734450391	Atp5g1	liver
51.552001466542	-0.0875261490708155	0.401354854045921	-0.218076717369914	0.827369337685817	0.931254971216353	Hoxb4	liver
35.2802476799853	-0.0362446899175146	0.49942773196511	-0.0725724416121263	0.94214635728447	0.978818654601259	Hoxb3	liver
352.0087562323	0.174932424597916	0.190646242169105	0.917576043501285	0.358840864680903	0.633736350964973	Snx11	liver
640.397579846225	-0.155650632380955	0.163905057013259	-0.949638987455789	0.342295721085241	0.617641746610986	Cbx1	liver
7333.68035054911	0.278883329771268	0.160025880029094	1.74273892273277	0.081379229429222	0.287347264465378	Nfe2l1	liver
514.427580039532	-0.38673890410313	0.186430834397709	-2.07443637396434	0.0380388021211889	0.183336053492749	Copz2	liver
3642.89841987262	-0.200536804569169	0.152851365212424	-1.31197261006125	0.189529376294204	0.459074412639146	Cdk5rap3	liver
8602.65763493067	0.152379588354118	0.125154547621576	1.21753137420832	0.223402106835139	0.500031986881179	Pnpo	liver
48.4903303845466	0.0750860963963665	0.391181441682571	0.191946980085257	0.847783736806832	0.939594396344503	D030028A08Rik	liver
240.580732611014	0.23865222843888	0.215077150561664	1.10961219179095	0.26716617534245	0.544933838771438	Sp2	liver
1533.45261456353	-0.315561003361778	0.144019575513144	-2.19109799648714	0.0284447016918781	0.152849683841894	Scrn2	liver
44.8442735640319	-0.103109723621512	0.384699724917909	-0.268026507280488	0.788678915109523	0.914862795947437	Lrrc46	liver
2206.65184267852	-0.0392958159019726	0.131399558539046	-0.29905592027005	0.764897378514128	0.901836989063733	Mrpl10	liver
85.8760618281111	-0.558898055082776	0.340619079283334	-1.64083015038002	0.100832677726514	0.326576788093163	Osbpl7	liver
284.663054018596	-0.401447381336498	0.209279340187718	-1.91823703656754	0.0550809620170808	0.229281651579751	Tbkbp1	liver
6307.52837212708	0.334922102624991	0.147293535164418	2.2738411584129	0.02297553860108	0.133074496567642	Kpnb1	liver
1624.77272345421	0.440962395761467	0.14041521086593	3.14041757329626	0.00168707175118745	0.0229846808230861	Npepps	liver
1030.72772657861	-0.189816751403967	0.150577082691757	-1.26059522478953	0.207454719979051	0.480742657782289	Mrpl45	liver
1013.87692781674	0.275468339868627	0.159661409102106	1.72532825194133	0.0844683332883639	0.293941003603997	Socs7	liver
622.51376193841	-0.165085339513164	0.279909309793783	-0.589781524718801	0.555337130542334	0.780439551860168	Arhgap23	liver
62.2185334299533	-0.0707910768463501	0.463983439726959	-0.152572421308848	0.878735474934661	0.95090292016407	E130012A19Rik	liver
1377.66435386551	0.319608660271165	0.214407805405205	1.49065776624663	0.136051369679084	0.386469416113194	Mllt6	liver
683.545488265016	-0.770393538481881	0.212494001467854	-3.62548369911715	0.000288421090529731	0.00617385359265599	Cisd3	liver
184.922881566084	0.329354432675551	0.251067906908825	1.3118141491304	0.189582849708335	0.459074412639146	Pcgf2	liver
1813.37920249523	-0.133947881885148	0.160093817399975	-0.836683664994356	0.40277040342321	0.672520934025488	Psmb3	liver
1628.60117739664	0.528644008737769	0.160614333013927	3.29138750457552	0.000996944813939514	0.0158431256429225	Pip4k2b	liver
514.07535364776	0.0483399167610161	0.155551861342292	0.310763987932258	0.755980048512098	0.897146381374618	Cwc25	liver
6054.88481954025	-0.180070588072628	0.16252428118232	-1.10796114133016	0.26787859827729	0.545764724616186	Rpl23	liver
6983.27786922757	0.365404311339628	0.12333244304119	2.96275904643835	0.00304895137358863	0.0343435253036247	Lasp1	liver
65.5723961698856	0.273616489466846	0.38110845515571	0.717949144830844	0.472788644102791	0.72565709703565	Plxdc1	liver
5348.48440543162	-0.219610807029169	0.12406413095639	-1.77013940561407	0.0767039205152054	0.278271460735199	Rpl19	liver
3540.97919156038	0.408304091677378	0.161688678510703	2.52524849258601	0.0115616505385695	0.0850162933856917	Fbxl20	liver
1733.49848910423	0.476576129663195	0.142314274351923	3.34875845612429	0.000811745302428344	0.0134234350723968	Med1	liver
1276.95259919133	0.413402992586772	0.151989690446115	2.71994101292901	0.00652935626610855	0.058530667571748	Cdk12	liver
145.165223927743	-1.47127844919352	0.327475759934848	-4.49278581561648	7.02974774291232e-06	0.000353840440783411	Ppp1r1b	liver
714.054275438188	-0.0900499985867727	0.173321388092277	-0.519555027673962	0.603373750015338	0.80999485321841	Stard3	liver
142.804510722562	0.288335409502078	0.258056708293364	1.11733351715195	0.263851749620353	0.541935102796666	Pgap3	liver
51.1801345354356	-0.339876474483468	0.380828718989562	-0.892465451096359	0.372143502956668	0.645549580471336	Erbb2	liver
1849.22185656232	-0.0330833400787324	0.170508677079426	-0.194027310782087	0.846154497334518	0.93918125005304	Mien1	liver
5161.25153411891	-0.429357286852318	0.141448089049006	-3.03544070293917	0.00240184447304941	0.0290322341130426	Grb7	liver
36.9848921134524	-0.559376153434984	0.476976125426959	-1.17275503660538	0.240894053861321	0.518768980273267	Ikzf3	liver
4157.63826146588	-0.22348407860194	0.156707223030092	-1.42612493719594	0.153832281749137	0.412911332270876	Ormdl3	liver
4191.53282751106	-0.0222235557914195	0.120273028376224	-0.184775889419716	0.853404819659863	0.941577321373982	Psmd3	liver
840.265862564441	0.258592005378648	0.184848192021999	1.39894257309194	0.161830204611469	0.42303723630508	Med24	liver
546.041032074648	-0.0158255602123545	0.199646488496929	-0.0792679116547445	0.936819528755832	0.976698886135563	Thra	liver
4183.08183154019	0.109746420630266	0.749105337427084	0.146503322225959	0.883524067459846	0.952630282111885	Nr1d1	liver
2151.98354828613	0.271768782398629	0.118581822379277	2.29182497743534	0.0219157447608808	0.128922449620243	Msl1	liver
1038.01377420905	0.321265134329788	0.185734938845123	1.7296968267111	0.0836844559642776	0.292178408757596	Casc3	liver
38.718067273238	0.442848780158514	0.422889783161397	1.04719668762842	0.295008872690222	0.573993631960192	Rapgefl1	liver
752.067306153812	0.211689004031475	0.164936354680864	1.28345872831416	0.19933141002837	0.471389200440591	Wipf2	liver
857.267515193166	-0.242626903470212	0.185209991235124	-1.31000979942922	0.190192520528334	0.459817559214705	Rara	liver
119.561625171716	0.101402850399402	0.317596658730069	0.319281855183453	0.749512790679701	0.893822274498444	Top2a	liver
48404.8580872473	-0.131323575339717	0.152803554370285	-0.859427490943593	0.390104708075412	0.661352823865164	Igfbp4	liver
710.443602493967	0.0199769740964473	0.14619184680672	0.136649030248991	0.891308219440759	0.95568564526555	Smarce1	liver
66.3403689263062	-0.418698262218449	0.455914575037281	-0.91836998671124	0.358425198141978	0.633444268201557	Krt10	liver
70.753133636238	0.0826096810166712	0.456822452556226	0.180835422064776	0.856496758660484	0.942694968589719	Krt23	liver
5784.45932481712	-0.168249457845654	0.144889518098964	-1.16122587784945	0.245550053617901	0.52356737770708	Eif1	liver
[truncated: 19,176 more rows]
