# Supplementary material for: Inducible and reversible inhibition of miRNA-mediated gene repression in vivo
Source: eLife. 2021 Aug 31;10:e70948. doi: 10.7554/eLife.70948 (PMC8476124; doi:10.7554/eLife.70948)
Supplement: Figure 2—source data 2. [file elife-70948-fig2-data2.csv]

seed	miRNA	z_score	pvalue	fdr	gene_set_size	tissue	counts	conservation	miRNA_family
AAAGUGC	mmu-miR-106a/mmu-miR-17/mmu-miR-106b/mmu-miR-20a/mmu-miR-93/mmu-miR-20b	10.7373129083552	3.39973192247063e-27	2.0602375450172e-24	560	Intestine	75410	2	mmu-miR-106a/mmu-miR-17/mmu-miR-106b/mmu-miR-20a/mmu-miR-93/mmu-miR-20b
AAGUGCU	mmu-miR-302a/mmu-miR-291a-3p/mmu-miR-294/mmu-miR-295/mmu-miR-302d/mmu-miR-302b	8.11329794736785	2.46320396755113e-16	1.37939422182863e-13	334	Intestine	46	2	mmu-miR-302a/mmu-miR-291a-3p/mmu-miR-294/mmu-miR-295/mmu-miR-302d/mmu-miR-302b
AAGUUGU	mmu-miR-382	5.75399777842902	4.35786509929035e-09	1.96975502487924e-06	73	Intestine	82	1	mmu-miR-382
ACACACC	mmu-miR-329/mmu-miR-362-3p	4.33693962079796	7.22401462262731e-06	0.00239114884008964	125	Intestine	690	1	mmu-miR-329/mmu-miR-362-3p
ACAUACA	mmu-miR-466m-3p/mmu-miR-466o-3p	10.1230151992616	2.18374802500749e-24	1.30151382290446e-21	290	Intestine	2	0	mmu-miR-466m-3p/mmu-miR-466o-3p
ACAUUCA	mmu-miR-181a/mmu-miR-181c/mmu-miR-181d/mmu-miR-181b	12.4100316780378	1.15280774793155e-35	7.1474080371756e-33	480	Intestine	264940	2	mmu-miR-181a/mmu-miR-181c/mmu-miR-181d/mmu-miR-181b
AGUUGUG	mmu-miR-669o-5p	3.26109987777492	0.000554904705306646	0.141500699853195	61	Intestine	27	0	mmu-miR-669o-5p
AUACAUA	mmu-miR-297b-3p/mmu-miR-467g/mmu-miR-466a-3p/mmu-miR-466d-3p	11.2558091143628	1.08413487479224e-29	6.63490543372853e-27	395	Intestine	51	0	mmu-miR-297b-3p/mmu-miR-467g/mmu-miR-466a-3p/mmu-miR-466d-3p
AUAUACA	mmu-miR-669f-3p	12.7171310714163	2.37490644766375e-37	1.47481690399919e-34	666	Intestine	72	0	mmu-miR-669f-3p
CCCCUGG	mmu-miR-331-3p	0.481491758512618	0.315083517875277	1	65	Intestine	797	1	mmu-miR-331-3p
CUGGCUG	mmu-miR-3085-3p/mmu-miR-3064-5p	1.00993470702075	0.156263286541839	1	160	Intestine	15	1	mmu-miR-3085-3p/mmu-miR-3064-5p
CUGGUCC	mmu-miR-1934	1.12618172815442	0.130044302957232	1	115	Intestine	47	0	mmu-miR-1934
CUUUGGU	mmu-miR-9	9.03269481906828	8.37476398600073e-20	4.84061358390842e-17	597	Intestine	1755	2	mmu-miR-9
GAUUGUC	mmu-miR-219-5p	6.84057615651452	3.94376510313885e-12	2.00737643749767e-09	177	Intestine	2377	2	mmu-miR-219-5p
GCACCAC	mmu-miR-770-5p	4.96491735652394	3.436516558826e-07	0.00013608605572951	104	Intestine	31	0	mmu-miR-770-5p
GCAGCUG	mmu-miR-1968	3.66100470714139	0.000125614071309155	0.0360512384657275	193	Intestine	189	0	mmu-miR-1968
GCCCCCU	mmu-miR-3072	-0.270447039036395	0.393408177959611	1	35	Intestine	14	0	mmu-miR-3072
GCUGGAG	mmu-miR-1964-5p	2.30310733121079	0.010636402464805	1	103	Intestine	23	0	mmu-miR-1964-5p
GGCAGUG	mmu-miR-34a/mmu-miR-449a/mmu-miR-449c/mmu-miR-34b-5p/mmu-miR-34c/mmu-miR-449b	3.88203983275498	5.17919522928879e-05	0.0154857937355735	239	Intestine	7571	2	mmu-miR-34a/mmu-miR-449a/mmu-miR-449c/mmu-miR-34b-5p/mmu-miR-34c/mmu-miR-449b
GUGGGGA	mmu-miR-491	-1.23210485878943	0.108954958323634	1	53	Intestine	58	1	mmu-miR-491
UACAUAC	mmu-miR-466b-3p	9.04721477327387	7.3330686340086e-20	4.24584673909098e-17	266	Intestine	41	0	mmu-miR-466b-3p
UCUGCCU	mmu-miR-3110	1.41926514876105	0.0779108643275773	1	103	Intestine	45	0	mmu-miR-3110
UGUGCUU	mmu-miR-218	8.10802472373262	2.57246351633444e-16	1.43800710563095e-13	364	Intestine	1484	2	mmu-miR-218
UUAUUGA	mmu-miR-325	2.45901688161026	0.00696590332689027	1	920	Intestine	5	1	mmu-miR-325
UUGGCAA	mmu-miR-182	9.27582437324771	8.81253771969877e-21	5.13770949058438e-18	505	Intestine	452447	2	mmu-miR-182
UUGGCAC	mmu-miR-96	6.43283646056677	6.262219310975e-11	3.0559630237558e-08	483	Intestine	4315	2	mmu-miR-96
AACAUCC	mmu-miR-448-5p	5.73982277981612	4.7387839238596e-09	2.13719154966068e-06	78	Intestine	8	0	mmu-miR-448-5p
AACAUUC	mmu-miR-543	9.40474672388926	2.6077832829579e-21	1.53076878709629e-18	248	Intestine	27	1	mmu-miR-543
AGGUCAC	mmu-miR-1193-3p	5.31895409529623	5.21827304475825e-08	2.23342086315653e-05	98	Intestine	35	1	mmu-miR-1193-3p
AGUGGUU	mmu-miR-876-3p/mmu-miR-140	4.10972302067337	1.98066986569033e-05	0.00629853017289525	127	Intestine	3152	2	mmu-miR-876-3p/mmu-miR-140
CCAGUGU	mmu-miR-199a-5p	5.5318404391961	1.58444052889708e-08	6.92400511128024e-06	213	Intestine	14162	2	mmu-miR-199a-5p
CCCUGAG	mmu-miR-125a-5p/mmu-miR-351/mmu-miR-125b-5p	3.27706183213509	0.000524466980144101	0.134788013897034	388	Intestine	34031	2	mmu-miR-125a-5p/mmu-miR-351/mmu-miR-125b-5p
CCCUGUC	mmu-miR-339-5p	0.880139127156665	0.189391972549395	1	71	Intestine	722	1	mmu-miR-339-5p
GAGAACU	mmu-miR-146a/mmu-miR-146b	2.39466941118116	0.00831767826689465	1	76	Intestine	301267	2	mmu-miR-146a/mmu-miR-146b
GAGGUAG	mmu-miR-1961/mmu-let-7g/mmu-miR-98/mmu-let-7a/mmu-let-7b/mmu-let-7i/mmu-let-7d/mmu-let-7f/mmu-let-7e/mmu-let-7c	8.23036345298543	9.33231278538325e-17	5.25409209817077e-14	487	Intestine	782712	2	mmu-miR-1961/mmu-let-7g/mmu-miR-98/mmu-let-7a/mmu-let-7b/mmu-let-7i/mmu-let-7d/mmu-let-7f/mmu-let-7e/mmu-let-7c
GAGGUAU	mmu-miR-202-3p	9.76424890858006	8.01476645870759e-23	4.74474174355489e-20	339	Intestine	7482	0	mmu-miR-202-3p
UCCCUGA	mmu-miR-670	4.4286767578952	4.74064986449617e-06	0.0016070803040642	307	Intestine	5	0	mmu-miR-670
AUUUAGA	mmu-miR-465a-5p/mmu-miR-465b-5p/mmu-miR-465c-5p	7.08448788677471	6.97797091050841e-13	3.61458893164335e-10	170	Intestine	62	0	mmu-miR-465a-5p/mmu-miR-465b-5p/mmu-miR-465c-5p
AUUCAUU	mmu-miR-664	6.8819949132557	2.95100607575509e-12	1.51386611686236e-09	190	Intestine	620	0	mmu-miR-664
GGUGUGA	mmu-miR-1188	2.01726048947439	0.0218341682537763	1	48	Intestine	33	0	mmu-miR-1188
AUAAAUA	mmu-miR-466l-3p	12.7781209167015	1.08627568511175e-37	6.75663476139509e-35	1418	Intestine	0	0	mmu-miR-466l-3p
GGUCAGA	mmu-miR-540-3p	3.74078017612507	9.17249596779774e-05	0.0267836882259694	106	Intestine	107	0	mmu-miR-540-3p
UAAUACA	mmu-miR-374c	11.1615320101675	3.14491100443457e-29	1.92154062370952e-26	348	Intestine	2	1	mmu-miR-374c
AACAAAC	mmu-miR-1192/mmu-miR-495	8.8432708478299	4.64782664024933e-19	2.68179597142386e-16	348	Intestine	101	1	mmu-miR-1192/mmu-miR-495
AAGGCAC	mmu-miR-124	7.74592001373365	4.74461168647088e-15	2.60953642755898e-12	846	Intestine	189	2	mmu-miR-124
AAUACUG	mmu-miR-200b/mmu-miR-429/mmu-miR-200c	13.5455896329527	4.20677934841382e-42	2.62923709275864e-39	463	Intestine	268296	2	mmu-miR-200b/mmu-miR-429/mmu-miR-200c
ACAAUAU	mmu-miR-338-5p	10.4653300017879	6.23207332357822e-26	3.73924399414693e-23	357	Intestine	53	0	mmu-miR-338-5p
ACAGUAC	mmu-miR-101a/mmu-miR-101b	10.7057908187357	4.78053904028277e-27	2.88744558033079e-24	325	Intestine	52121	2	mmu-miR-101a/mmu-miR-101b
ACAGUAU	mmu-miR-144	11.7045065024518	6.04301708546667e-32	3.72854154173294e-29	332	Intestine	892	2	mmu-miR-144
ACCCUGU	mmu-miR-10a/mmu-miR-10b	6.13190362602726	4.34168517525677e-10	2.04059203237068e-07	114	Intestine	9498073	2	mmu-miR-10a/mmu-miR-10b
ACUGUGU	mmu-miR-881	4.84897977710006	6.20490352580936e-07	0.000237647805038498	79	Intestine	7	0	mmu-miR-881
AGGAAAG	mmu-miR-1958	6.61325124238611	1.87984772482414e-11	9.36164166962419e-09	196	Intestine	5	0	mmu-miR-1958
AUAUAAC	mmu-miR-344d/mmu-miR-410/mmu-miR-344e	7.29433600137665	1.50067782246329e-13	7.93858568083082e-11	287	Intestine	1553	1	mmu-miR-344d/mmu-miR-410/mmu-miR-344e
AUUCAGA	mmu-miR-871-5p	7.26575975704357	1.85473677909253e-13	9.75591545802671e-11	179	Intestine	15	0	mmu-miR-871-5p
AUUGCAC	mmu-miR-25/mmu-miR-92a/mmu-miR-363-3p/mmu-miR-367/mmu-miR-32/mmu-miR-92b	11.0402283785825	1.22205578788165e-28	7.44231974819926e-26	397	Intestine	225112	2	mmu-miR-25/mmu-miR-92a/mmu-miR-363-3p/mmu-miR-367/mmu-miR-32/mmu-miR-92b
CACAGUG	mmu-miR-128	7.84700763879842	2.13040654250522e-15	1.1823756310904e-12	466	Intestine	1240	2	mmu-miR-128
CAGUGCA	mmu-miR-148a/mmu-miR-148b/mmu-miR-152	8.77383137227759	8.63438852123048e-19	4.96477339970753e-16	299	Intestine	1114157	2	mmu-miR-148a/mmu-miR-148b/mmu-miR-152
CAGUGCU	mmu-miR-1960	7.26995044580935	1.79809698513272e-13	9.47597111164946e-11	229	Intestine	88	0	mmu-miR-1960
CAUGGAU	mmu-miR-490-5p	2.93483580798672	0.00166862113660387	0.387120103692099	41	Intestine	107	0	mmu-miR-490-5p
CUACAGU	mmu-miR-139-5p	6.01141297074208	9.19566181299872e-10	4.26678708123141e-07	138	Intestine	1672	2	mmu-miR-139-5p
GCUACAU	mmu-miR-222/mmu-miR-1928/mmu-miR-221	7.47037559406662	3.99831204740395e-14	2.14309525740852e-11	164	Intestine	6044	2	mmu-miR-222/mmu-miR-1928/mmu-miR-221
GGUUACC	mmu-miR-409-5p	4.11980704611106	1.89594905053675e-05	0.00604807747121223	57	Intestine	44	1	mmu-miR-409-5p
GUAAACA	mmu-miR-30b/mmu-miR-30a/mmu-miR-30e/mmu-miR-384-5p/mmu-miR-30c/mmu-miR-30d	14.8594753718535	3.01981473442695e-50	1.89040402375127e-47	644	Intestine	1390081	2	mmu-miR-30b/mmu-miR-30a/mmu-miR-30e/mmu-miR-384-5p/mmu-miR-30c/mmu-miR-30d
GUGUGUG	mmu-miR-466k/mmu-miR-466i-5p/mmu-miR-466d-5p	2.86861415231095	0.00206137199312491	0.46999281443248	157	Intestine	12	0	mmu-miR-466k/mmu-miR-466i-5p/mmu-miR-466d-5p
UAGAGGA	mmu-miR-877	3.48078993200225	0.000249968710065203	0.0692413326880612	43	Intestine	65	1	mmu-miR-877
UCAAGUA	mmu-miR-26b/mmu-miR-26a	13.3455221048304	6.28930915303277e-41	3.92452891149245e-38	429	Intestine	744465	2	mmu-miR-26b/mmu-miR-26a
UCACAGC	mmu-miR-673-5p	10.1016153387379	2.71698153139337e-24	1.61660401117905e-21	389	Intestine	223	0	mmu-miR-673-5p
UCACAGU	mmu-miR-27a/mmu-miR-27b	10.717084466487	4.23145276799418e-27	2.56002892463648e-24	528	Intestine	377959	2	mmu-miR-27a/mmu-miR-27b
UGCAGUC	mmu-miR-682	3.97394625446076	3.53457606254833e-05	0.0108511485120234	86	Intestine	8	2	mmu-miR-682
GCCACAC	mmu-miR-3064-3p	2.54132537416284	0.00552165479220738	1	81	Intestine	21	0	mmu-miR-3064-3p
CUUGUGU	mmu-miR-669d	3.82463227160554	6.54837091156412e-05	0.0193176941891142	54	Intestine	20	0	mmu-miR-669d
UAUUGCU	mmu-miR-137	9.21759467840971	1.51919627479048e-20	8.82653035653271e-18	487	Intestine	588	2	mmu-miR-137
AAUGCCC	mmu-miR-365	7.5455377971996	2.25212424914533e-14	1.22065134303677e-11	125	Intestine	1057	2	mmu-miR-365
ACAUAGA	mmu-miR-376c	5.14371548486689	1.34678685199113e-07	5.57569756724326e-05	97	Intestine	57	1	mmu-miR-376c
AGGGAGG	mmu-miR-1943	0.762057369106109	0.223012882487936	1	86	Intestine	227	0	mmu-miR-1943
AUAAAGU	mmu-miR-142-5p	6.79729275764313	5.33016673271423e-12	2.70239453348611e-09	311	Intestine	53109	2	mmu-miR-142-5p
CAGUAGU	mmu-miR-199a-3p	7.1280000239227	5.09188797361407e-13	2.64778174627931e-10	181	Intestine	73882	2	mmu-miR-199a-3p
GUAGUGU	mmu-miR-142-3p	6.17107492802385	3.39136336785651e-10	1.60750623636399e-07	178	Intestine	11253	2	mmu-miR-142-3p
AGCACCC	mmu-miR-3102	3.79614277899373	7.34824382865018e-05	0.0216038368562315	229	Intestine	98	0	mmu-miR-3102
AUACAAG	mmu-miR-539-3p/mmu-miR-381	10.5905070813036	1.64900208120497e-26	9.92699252885391e-24	382	Intestine	2083	1	mmu-miR-539-3p/mmu-miR-381
CCUGUAC	mmu-miR-3107	4.08085333029902	2.24353318457724e-05	0.0070671295314183	51	Intestine	93017	1	mmu-miR-3107
GCUGAGA	mmu-miR-883a-5p	3.17546210684806	0.00074799029294609	0.186249582943576	108	Intestine	0	0	mmu-miR-883a-5p
AAAGCUG	mmu-miR-320	9.75604224484803	8.69030400692784e-23	5.13596966809435e-20	277	Intestine	4323	1	mmu-miR-320
ACAUGGC	mmu-miR-3082-3p	6.23556388357867	2.25076798384276e-10	1.073616328293e-07	102	Intestine	203	0	mmu-miR-3082-3p
AAAGACA	mmu-miR-743a/mmu-miR-743b-3p	7.56087952654406	2.00176462667723e-14	1.08695819228574e-11	259	Intestine	2	0	mmu-miR-743a/mmu-miR-743b-3p
AAAUCUU	mmu-miR-1264-3p	7.66788562930623	8.74273447113985e-15	4.77353302124236e-12	221	Intestine	26	0	mmu-miR-1264-3p
AGAUUGU	mmu-miR-3086-5p	5.26673539569694	6.9435572451527e-08	2.94406827194475e-05	90	Intestine	16	0	mmu-miR-3086-5p
AGCACCA	mmu-miR-29a/mmu-miR-29b/mmu-miR-29c	7.73482552383918	5.17725051564361e-15	2.8371332825727e-12	470	Intestine	60290	2	mmu-miR-29a/mmu-miR-29b/mmu-miR-29c
AGGUAGU	mmu-miR-196b/mmu-miR-196a	6.06041473606403	6.78855042108179e-10	3.17025304664519e-07	107	Intestine	262	2	mmu-miR-196b/mmu-miR-196a
CAACAAA	mmu-miR-3065	8.72431040206541	1.33903790385785e-18	7.68607756814405e-16	263	Intestine	18	0	mmu-miR-3065
CAAGAGC	mmu-miR-335-5p	6.29524969728788	1.53452709956701e-10	7.39642061991298e-08	92	Intestine	756	1	mmu-miR-335-5p
CUGGCUC	mmu-miR-149	3.02698751358573	0.00123502080653584	0.29758132787111	153	Intestine	452	1	mmu-miR-149
GCAUCUG	mmu-miR-3089-3p	6.2678872847381	1.82989766200306e-10	8.80180775423471e-08	107	Intestine	15	0	mmu-miR-3089-3p
GGAGAGA	mmu-miR-185/mmu-miR-882/mmu-miR-3473	1.42493231814794	0.077088383249626	1	75	Intestine	918	1	mmu-miR-185/mmu-miR-882/mmu-miR-3473
GGCUCAG	mmu-miR-24	1.79105367347402	0.0366423411454409	1	260	Intestine	49929	2	mmu-miR-24
GGCUCAU	mmu-miR-3106	4.86804997960177	5.63524149792066e-07	0.00021808384596953	155	Intestine	3	0	mmu-miR-3106
GUGACAG	mmu-miR-542-3p	3.8481897963571	5.94969249379867e-05	0.0176705867065821	86	Intestine	981	1	mmu-miR-542-3p
UCACAUU	mmu-miR-23a/mmu-miR-23b	11.9844796205567	2.1426341402697e-33	1.32629053282695e-30	454	Intestine	72104	2	mmu-miR-23a/mmu-miR-23b
UGCAUUG	mmu-miR-33	6.84748306908583	3.7580292051682e-12	1.91659489463578e-09	140	Intestine	427	2	mmu-miR-33
UCCCUUU	mmu-miR-211/mmu-miR-204	7.51454045053386	2.85555945547806e-14	1.54485766541363e-11	244	Intestine	1919	2	mmu-miR-211/mmu-miR-204
AAUCUCA	mmu-miR-216a	4.84757710709964	6.24892310868094e-07	0.000238708862751612	88	Intestine	2938	2	mmu-miR-216a
AUACAUG	mmu-miR-466n-3p	10.0444188818259	4.86094977033644e-24	2.88254321380951e-21	294	Intestine	2	0	mmu-miR-466n-3p
CUGAGUC	mmu-miR-1199	2.82494586226487	0.00236443026111601	0.529632378489987	80	Intestine	70	0	mmu-miR-1199
GAGAAAU	mmu-miR-539-5p	7.21647636666602	2.66759651311599e-13	1.39782057287278e-10	216	Intestine	23	0	mmu-miR-539-5p
GCACCCC	mmu-miR-3093-5p	0.911948730524753	0.18089785363347	1	53	Intestine	4	0	mmu-miR-3093-5p
UAUACAU	mmu-miR-669m-3p	11.4240067951157	1.58631033394244e-30	9.73994545040659e-28	428	Intestine	14	0	mmu-miR-669m-3p
CACUGAG	mmu-miR-674/mmu-miR-3473d	4.54642309419322	2.72826474522708e-06	0.000954892660829479	130	Intestine	408	0	mmu-miR-674/mmu-miR-3473d
CUGGACU	mmu-miR-378	2.64549940038849	0.00407852157946185	0.876882139584297	60	Intestine	471123	1	mmu-miR-378
GUCAACA	mmu-miR-505-3p	5.87418840846456	2.12459944899411e-09	9.75191147088297e-07	87	Intestine	83	1	mmu-miR-505-3p
GUUCUCA	mmu-miR-3067	4.49264201015156	3.51724897030925e-06	0.00122048539269731	74	Intestine	5	0	mmu-miR-3067
UCCAGUU	mmu-miR-145	7.17649467767245	3.57607173799876e-13	1.86670944723535e-10	283	Intestine	203441	2	mmu-miR-145
UGAUGUC	mmu-miR-3073-3p	5.95024622061741	1.3386970443667e-09	6.19816731541782e-07	40	Intestine	58	0	mmu-miR-3073-3p
GGAAUGU	mmu-miR-1a/mmu-miR-206	9.68094822817945	1.81665163997019e-22	1.07182446758241e-19	391	Intestine	4672	2	mmu-miR-1a/mmu-miR-206
GGUGCCA	mmu-miR-3085-5p	2.29250811269957	0.0109381699756558	1	71	Intestine	5	0	mmu-miR-3085-5p
UGGUCAC	mmu-miR-3073-5p	6.11155846225485	4.93314226631561e-10	2.31364372290202e-07	150	Intestine	11	0	mmu-miR-3073-5p
UUGGUCC	mmu-miR-133a/mmu-miR-133b	4.93826639695645	3.9410061016354e-07	0.000154487439184108	295	Intestine	176	2	mmu-miR-133a/mmu-miR-133b
UAAAGGC	mmu-miR-1971/mmu-miR-1981	7.29964489366657	1.44264101390941e-13	7.6459973737199e-11	157	Intestine	770	0	mmu-miR-1971/mmu-miR-1981
AAAGAAU	mmu-miR-186	10.0853384371255	3.20718777988425e-24	1.90506954125125e-21	287	Intestine	39418	1	mmu-miR-186
AGCAGCG	mmu-miR-503	5.61153308631819	1.00270967144958e-08	4.42194965109266e-06	162	Intestine	28	1	mmu-miR-503
GAGGCUG	mmu-miR-1962/mmu-miR-485	2.24262391575021	0.0124605383464935	1	108	Intestine	16	1	mmu-miR-1962/mmu-miR-485
ACAUUAC	mmu-miR-323-3p	9.33979741554523	4.8259307145156e-21	2.81834353727711e-18	223	Intestine	51	1	mmu-miR-323-3p
AGGCUCU	mmu-miR-344g-3p	3.3160976655098	0.000456419607148537	0.119125517465768	58	Intestine	49	0	mmu-miR-344g-3p
AUUAUUA	mmu-miR-126-5p	6.56373627743416	2.62379887611296e-11	1.30140424255203e-08	219	Intestine	46110	0	mmu-miR-126-5p
CAGCCAC	mmu-miR-3058	2.30343968523927	0.0106270585266125	1	107	Intestine	6	0	mmu-miR-3058
CAGUCUC	mmu-miR-452-3p	2.84237356767047	0.00223894940342151	0.508241514576684	113	Intestine	6	1	mmu-miR-452-3p
CCUUGGC	mmu-miR-212-5p	2.36966436049502	0.00890211984335324	1	105	Intestine	228	2	mmu-miR-212-5p
GAAAGGU	mmu-miR-471-3p	4.95763158725016	3.5678855624068e-07	0.000140931479715069	93	Intestine	1	0	mmu-miR-471-3p
GAGCAAG	mmu-miR-3105-5p	2.98504095043786	0.00141770181248583	0.334577627746656	98	Intestine	20	0	mmu-miR-3105-5p
GCCCCUG	mmu-miR-3070b-5p	-1.11252454977222	0.132956340375498	1	58	Intestine	25	0	mmu-miR-3070b-5p
GGCUGGG	mmu-miR-3083	-1.5664794182946	0.058618211621671	1	167	Intestine	2	0	mmu-miR-3083
GGGCCUG	mmu-miR-3091-3p/mmu-miR-2861	-1.88295937150248	0.0298529370733723	1	74	Intestine	79	0	mmu-miR-3091-3p/mmu-miR-2861
UCUUGGA	mmu-miR-470	4.57306653073469	2.40318719138894e-06	0.000845921891368906	101	Intestine	10	0	mmu-miR-470
UGAAAGG	mmu-miR-488	6.76580698090265	6.62840928828516e-12	3.34734669058401e-09	126	Intestine	478	1	mmu-miR-488
UUUGCAG	mmu-miR-450b-5p	6.14720650131606	3.94297173859413e-10	1.85713968887783e-07	180	Intestine	371	0	mmu-miR-450b-5p
UUUUUGC	mmu-miR-129-5p	7.0239089409858	1.07872722465917e-12	5.56623247924132e-10	197	Intestine	265	2	mmu-miR-129-5p
AGUGCAA	mmu-miR-130a/mmu-miR-721/mmu-miR-301a/mmu-miR-130b/mmu-miR-301b	10.7819414347419	2.09474376771286e-27	1.27360421076942e-24	374	Intestine	37285	2	mmu-miR-130a/mmu-miR-721/mmu-miR-301a/mmu-miR-130b/mmu-miR-301b
GCUGGUG	mmu-miR-138	4.5088265007886	3.25935947574419e-06	0.00113425709755898	236	Intestine	1565	2	mmu-miR-138
GUGCAAA	mmu-miR-19a/mmu-miR-19b	10.7721233545364	2.33062617137359e-27	1.41469008602377e-24	509	Intestine	83775	2	mmu-miR-19a/mmu-miR-19b
ACUGCAU	mmu-miR-217	8.22427953425789	9.81838170930575e-17	5.51793052062983e-14	124	Intestine	2491	2	mmu-miR-217
GACACCU	mmu-miR-667	3.32041251456599	0.000449422628508172	0.117748728669141	45	Intestine	41	0	mmu-miR-667
UCUGCCA	mmu-miR-3084	2.98004998972442	0.00144100673532784	0.338636582802042	113	Intestine	82	0	mmu-miR-3084
UGCAUAG	mmu-miR-153	9.27301237699544	9.04807117692844e-21	5.26597742497235e-18	326	Intestine	705	2	mmu-miR-153
UGCAUAU	mmu-miR-448-3p	8.05547257711206	3.95861593503082e-16	2.20494907581216e-13	272	Intestine	11	1	mmu-miR-448-3p
AAUCUCU	mmu-miR-216b	3.47857933987561	0.000252039596686435	0.0695629286854562	90	Intestine	219	2	mmu-miR-216b
CUCAAAC	mmu-miR-290-5p/mmu-miR-292-5p	4.45202481856918	4.25321656001165e-06	0.00145034684696397	119	Intestine	15	1	mmu-miR-290-5p/mmu-miR-292-5p
CUCAUUU	mmu-miR-3071	6.44531086773347	5.76818542433005e-11	2.82641085792172e-08	156	Intestine	14	0	mmu-miR-3071
GCAUAUA	mmu-miR-669i/mmu-miR-669j	6.50728565501377	3.82604103295161e-11	1.89006427027809e-08	144	Intestine	0	0	mmu-miR-669i/mmu-miR-669j
AGCCCUU	mmu-miR-129-1-3p/mmu-miR-129-2-3p	6.31059976913967	1.38978078861502e-10	6.74043682478284e-08	166	Intestine	266	2	mmu-miR-129-1-3p/mmu-miR-129-2-3p
AAGUGCC	mmu-miR-467a/mmu-miR-290-3p/mmu-miR-292-3p	6.64767184056442	1.48882627875069e-11	7.45901965654095e-09	162	Intestine	105	0	mmu-miR-467a/mmu-miR-290-3p/mmu-miR-292-3p
AGCAUUG	mmu-miR-1955-3p	5.66180799152842	7.48931858451893e-09	3.34023608869544e-06	82	Intestine	49	0	mmu-miR-1955-3p
AUGGCUU	mmu-miR-135a/mmu-miR-135b	7.49668368702625	3.27263355392012e-14	1.76067685200903e-11	306	Intestine	299	2	mmu-miR-135a/mmu-miR-135b
CAUAGAA	mmu-miR-3112	4.5701551191187	2.43681671434464e-06	0.000855322666734969	129	Intestine	5	0	mmu-miR-3112
CAUGACA	mmu-miR-878-3p	4.19854986761537	1.34314850623729e-05	0.00433836967514645	78	Intestine	10	0	mmu-miR-878-3p
CUCUGGG	mmu-miR-330/mmu-miR-326	0.196633143061825	0.422057316254354	1	147	Intestine	1362	1	mmu-miR-330/mmu-miR-326
UAAUGCU	mmu-miR-155	5.0985737261103	1.7111112090558e-07	6.98020439385537e-05	155	Intestine	2097	2	mmu-miR-155
UAUAAAG	mmu-miR-340-5p	11.075670801634	8.23212615360245e-29	5.02159695369749e-26	574	Intestine	18494	1	mmu-miR-340-5p
UCAUUCG	mmu-miR-1298	4.41304778842151	5.09627434399059e-06	0.00170725190523685	54	Intestine	22	1	mmu-miR-1298
UUCCUAG	mmu-miR-384-3p	5.08976238359398	1.79256236762195e-07	7.27780321254514e-05	102	Intestine	150	1	mmu-miR-384-3p
AAGUCAC	mmu-miR-224	4.68173514007286	1.4222843000244e-06	0.000521978338108956	131	Intestine	507	1	mmu-miR-224
AUCUUAG	mmu-miR-1941-3p	3.62052912152948	0.000147000578027146	0.0418951647377367	42	Intestine	4	0	mmu-miR-1941-3p
CUCACCC	mmu-miR-1982.1	3.10562831730011	0.00094937608951238	0.231647765841021	45	Intestine	10	0	mmu-miR-1982.1
GCAUCCC	mmu-miR-324-5p	3.08869963119883	0.00100517289322962	0.244257013054798	54	Intestine	1449	1	mmu-miR-324-5p
UAAGUGU	mmu-miR-467e/mmu-miR-467h	5.4585369933012	2.40036924424409e-08	1.04176025200194e-05	96	Intestine	73	0	mmu-miR-467e/mmu-miR-467h
UCAUGAG	mmu-miR-3088	5.86267594079675	2.27733293095793e-09	1.04074114944777e-06	88	Intestine	11	0	mmu-miR-3088
UCAUGAU	mmu-miR-433	7.51178344355442	2.91636097445785e-14	1.57483492620724e-11	129	Intestine	67	1	mmu-miR-433
UUGGUAC	mmu-miR-547	6.87554437291687	3.08767903081419e-12	1.58089166377686e-09	205	Intestine	4	0	mmu-miR-547
GGAAGCC	mmu-miR-671-5p	1.0172083971591	0.154527151107155	1	112	Intestine	467	0	mmu-miR-671-5p
UGCCCUG	mmu-miR-874	2.89023674138047	0.00192475902466214	0.442694575672293	87	Intestine	345	1	mmu-miR-874
AAGUGCA	mmu-miR-291b-3p	8.78369749942155	7.9093378032593e-19	4.55577857467736e-16	359	Intestine	191	0	mmu-miR-291b-3p
AUCAAAG	mmu-miR-291a-5p/mmu-miR-291b-5p	8.6999918788246	1.65953962981228e-18	9.49256668252627e-16	294	Intestine	6	0	mmu-miR-291a-5p/mmu-miR-291b-5p
AUGGCAC	mmu-miR-183	7.74301173044923	4.85445399679235e-15	2.665095244239e-12	176	Intestine	120200	2	mmu-miR-183
CUCACAC	mmu-miR-342-3p	3.32871716172873	0.000436234788294778	0.115165984109821	88	Intestine	14315	1	mmu-miR-342-3p
GAGGUUG	mmu-miR-672	1.75540218785815	0.0395952690542119	1	70	Intestine	54	0	mmu-miR-672
UAAGACG	mmu-miR-208b/mmu-miR-208a-3p	5.31637005027842	5.29288799162143e-08	2.26006317242235e-05	78	Intestine	263	2	mmu-miR-208b/mmu-miR-208a-3p
UAAGACU	mmu-miR-499	6.507061256888	3.83175841448085e-11	1.89006427027809e-08	126	Intestine	54	2	mmu-miR-499
UCACAAA	mmu-miR-350	10.2964254139253	3.65641832979772e-25	2.18653816121904e-22	378	Intestine	435	0	mmu-miR-350
UCUAGGA	mmu-miR-1929	6.46926257772665	4.92411673813904e-11	2.41774131842627e-08	68	Intestine	14	0	mmu-miR-1929
UUGUGAC	mmu-miR-758	4.69876645564331	1.30868773534119e-06	0.000488140525282263	83	Intestine	40	1	mmu-miR-758
UCUCUAA	mmu-miR-3108	4.93401147174955	4.02788525732007e-07	0.000157490313561215	94	Intestine	21	0	mmu-miR-3108
GUCUGCC	mmu-miR-346	1.68762877920214	0.0457412555824062	1	48	Intestine	7	1	mmu-miR-346
GUCUUGC	mmu-miR-431	4.94428526440418	3.82118639652104e-07	0.000150172625383277	47	Intestine	73	1	mmu-miR-431
GUUUUGU	mmu-miR-669b	4.60862384589877	2.0267145172892e-06	0.000721510368154957	127	Intestine	13	0	mmu-miR-669b
UAUCAGA	mmu-miR-361	6.68582593579236	1.1481291649297e-11	5.76360840794707e-09	89	Intestine	3334	1	mmu-miR-361
CAGGAAC	mmu-miR-873	3.45202218020431	0.000278200993279062	0.0756706701719048	118	Intestine	20	1	mmu-miR-873
GAGGCUU	mmu-miR-879	3.49416225944426	0.00023777594669534	0.0663394891279998	67	Intestine	386	0	mmu-miR-879
AAGGUGC	mmu-miR-18a/mmu-miR-18b	7.50511259946038	3.06879105481641e-14	1.65407837854605e-11	112	Intestine	10821	2	mmu-miR-18a/mmu-miR-18b
AAGUGCG	mmu-miR-467c/mmu-miR-467d	4.02939999573879	2.79596990928298e-05	0.00872342611696289	87	Intestine	67	0	mmu-miR-467c/mmu-miR-467d
AGGGGGC	mmu-miR-3104-5p	-1.43258386101987	0.0759883983216116	1	24	Intestine	17	0	mmu-miR-3104-5p
CUCCCAA	mmu-miR-150/mmu-miR-5127	1.6094638201261	0.0537574800027249	1	110	Intestine	7072	2	mmu-miR-150/mmu-miR-5127
CUCCCAC	mmu-miR-532-3p	2.1233244448852	0.0168633368254572	1	95	Intestine	207	1	mmu-miR-532-3p
GCACUCU	mmu-miR-3076-3p	3.45361208021386	0.000276566200663007	0.0755025727810009	50	Intestine	18	0	mmu-miR-3076-3p
GUCUGGG	mmu-miR-3075	0.250829606024271	0.40097292541783	1	73	Intestine	29	0	mmu-miR-3075
UCUGCUG	mmu-miR-3098-3p	5.606083776182	1.03477909079317e-08	4.55302799948995e-06	142	Intestine	58	0	mmu-miR-3098-3p
ACAGGGG	mmu-miR-3076-5p	1.14710685264274	0.12566873103115	1	53	Intestine	8	0	mmu-miR-3076-5p
AGCAGCA	mmu-miR-497/mmu-miR-195/mmu-miR-15a/mmu-miR-16/mmu-miR-322/mmu-miR-1907/mmu-miR-15b	7.86166825747727	1.89525411967972e-15	1.05376129054193e-12	554	Intestine	173679	2	mmu-miR-497/mmu-miR-195/mmu-miR-15a/mmu-miR-16/mmu-miR-322/mmu-miR-1907/mmu-miR-15b
AGGUAGA	mmu-miR-1839-5p	6.04120074045227	7.64857583311461e-10	3.56423633823141e-07	141	Intestine	4058	0	mmu-miR-1839-5p
GCAGCAU	mmu-miR-103/mmu-miR-107	10.5412329720913	2.78814814773745e-26	1.67567703679021e-23	251	Intestine	80064	2	mmu-miR-103/mmu-miR-107
GCUGCAG	mmu-miR-666-3p	5.03710298080423	2.3631526541324e-07	9.45261061652961e-05	164	Intestine	35	0	mmu-miR-666-3p
AACUCAC	mmu-miR-3087	4.01556221256221	2.96521259413204e-05	0.00922181116775064	53	Intestine	3	0	mmu-miR-3087
ACAGGUG	mmu-miR-3097-5p	3.28147869947857	0.000516321618555532	0.133210977587327	84	Intestine	3	0	mmu-miR-3097-5p
AGCUGCC	mmu-miR-22	4.87510817429261	5.43744232028024e-07	0.000210972762026873	203	Intestine	253905	2	mmu-miR-22
AGGAGCU	mmu-miR-28/mmu-miR-708	2.51564248238573	0.00594078203475465	1	67	Intestine	4704	1	mmu-miR-28/mmu-miR-708
AGGUGGA	mmu-miR-363-5p	1.77537032808414	0.0379183799978459	1	39	Intestine	13	0	mmu-miR-363-5p
AUGCAAG	mmu-miR-300	6.61604119179272	1.84472801420454e-11	9.22364007102269e-09	148	Intestine	806	0	mmu-miR-300
AUUUAGC	mmu-miR-344b	6.2568512417565	1.96413890307896e-10	9.38858395671743e-08	102	Intestine	17	0	mmu-miR-344b
CUGCUUA	mmu-miR-3105-3p	5.02489777029881	2.51850388688536e-07	0.000100488305086726	88	Intestine	272	0	mmu-miR-3105-3p
GACUGGC	mmu-miR-871-3p	2.38592242333375	0.00851817217865177	1	46	Intestine	4	0	mmu-miR-871-3p
GAGUGUG	mmu-miR-574-5p	4.34863714654675	6.84930712357455e-06	0.00227396996502675	51	Intestine	489	0	mmu-miR-574-5p
GAGUUCA	mmu-miR-3089-5p	2.92692202785415	0.00171167347280597	0.395396572218179	57	Intestine	1	0	mmu-miR-3089-5p
GAUAUGU	mmu-miR-190/mmu-miR-190b	7.57033595895712	1.86130118777084e-14	1.01254784614734e-11	54	Intestine	1035	2	mmu-miR-190/mmu-miR-190b
GGACGGA	mmu-miR-184	2.82994029570503	0.00232783455869815	0.524439057703399	12	Intestine	512	2	mmu-miR-184
GGAGUGU	mmu-miR-122	1.39273715423514	0.0818496444502948	1	75	Intestine	43	2	mmu-miR-122
UCACACA	mmu-miR-377	5.38757284516048	3.57077670258539e-08	1.53543398211172e-05	200	Intestine	98	1	mmu-miR-377
UCAGACC	mmu-miR-3097-3p	1.66133814422844	0.0483227766215864	1	66	Intestine	8	0	mmu-miR-3097-3p
UGAGGAC	mmu-miR-1224	3.16322273138826	0.000780164521164822	0.192700636727711	44	Intestine	100	1	mmu-miR-1224
UGGAGUU	mmu-miR-3068	5.16982733968865	1.17155187976904e-07	4.8736558198392e-05	58	Intestine	605	0	mmu-miR-3068
UGGCCCU	mmu-miR-328	-0.310922668643381	0.377929705460512	1	70	Intestine	1534	1	mmu-miR-328
CUUGUUA	mmu-miR-544-5p	5.07022015328663	1.98677895091091e-07	8.00671917217095e-05	81	Intestine	20	1	mmu-miR-544-5p
GUCAGGC	mmu-miR-344g-5p	2.94677152429276	0.00160555182420062	0.374093575038745	48	Intestine	41	0	mmu-miR-344g-5p
AAAGCCA	mmu-miR-742	7.16286073019094	3.95053049322957e-13	2.0582263869726e-10	267	Intestine	3	0	mmu-miR-742
AACCUGG	mmu-miR-490-3p	3.98407287303442	3.38720417890153e-05	0.0104325888710167	74	Intestine	5872	2	mmu-miR-490-3p
ACAGAAC	mmu-miR-1912	9.1674468390592	2.42177248378425e-20	1.40462804059486e-17	301	Intestine	0	0	mmu-miR-1912
UGACCUA	mmu-miR-192/mmu-miR-215	5.70354484381814	5.86705745281684e-09	2.64017585376758e-06	51	Intestine	16609789	2	mmu-miR-192/mmu-miR-215
CAUAACA	mmu-miR-669a-3-3p/mmu-miR-669a-3p	5.13578396978847	1.40485133587501e-07	5.78798750380503e-05	80	Intestine	88	0	mmu-miR-669a-3-3p/mmu-miR-669a-3p
CCCACAG	mmu-miR-3057-3p	2.66821115483498	0.00381281580525317	0.823568213934684	141	Intestine	4	0	mmu-miR-3057-3p
GGAAGAC	mmu-miR-7a/mmu-miR-7b	6.345897281101	1.10566374874846e-10	5.37352581891753e-08	191	Intestine	21863	2	mmu-miR-7a/mmu-miR-7b
GGCUCUG	mmu-miR-760-3p	1.23523177747667	0.108372127901141	1	153	Intestine	13	1	mmu-miR-760-3p
GUCCCAG	mmu-miR-1955-5p	0.703537488123989	0.240860426435043	1	84	Intestine	28	0	mmu-miR-1955-5p
AUAAUAC	mmu-miR-369-3p	9.63211599902085	2.92559797006554e-22	1.7231772043686e-19	262	Intestine	110	1	mmu-miR-369-3p
AUGUGUU	mmu-miR-1198-5p	5.40662228384786	3.21121922409276e-08	1.38403548558398e-05	55	Intestine	1727	0	mmu-miR-1198-5p
GGCAAGA	mmu-miR-31	5.44106619531355	2.64813141013714e-08	1.14664090058938e-05	155	Intestine	33145	2	mmu-miR-31
GGGAGAU	mmu-miR-1941-5p	0.850030763917362	0.197653991330441	1	52	Intestine	13	0	mmu-miR-1941-5p
GUGUGCA	mmu-miR-466j/mmu-miR-466h-5p/mmu-miR-466m-5p	5.69989934175246	5.99390950157448e-09	2.69126536620694e-06	102	Intestine	24	0	mmu-miR-466j/mmu-miR-466h-5p/mmu-miR-466m-5p
UCAACAG	mmu-miR-421	7.04871916179846	9.02860865312421e-13	4.66779067366521e-10	153	Intestine	1469	1	mmu-miR-421
UGUGUGC	mmu-miR-466n-5p	4.60371054039051	2.07514605412948e-06	0.000736676849215964	68	Intestine	7	0	mmu-miR-466n-5p
AACAGUC	mmu-miR-132/mmu-miR-212-3p	7.79070332818159	3.33186055997479e-15	1.84585075022603e-12	161	Intestine	2822	2	mmu-miR-132/mmu-miR-212-3p
ACUCAGU	mmu-miR-201	3.19740837500238	0.000693342284950083	0.174028913522471	51	Intestine	11	0	mmu-miR-201
AUGCACC	mmu-miR-500/mmu-miR-501-3p	5.18055920377752	1.10610849527819e-07	4.62353351026284e-05	79	Intestine	1408	1	mmu-miR-500/mmu-miR-501-3p
CAGUCCA	mmu-miR-455	3.90851765735393	4.64320805802656e-05	0.0139760562546599	135	Intestine	439	2	mmu-miR-455
GGUCCUC	mmu-miR-1264-5p	3.22246534824135	0.000635462687377215	0.160136597219058	76	Intestine	4	0	mmu-miR-1264-5p
AGGACAC	mmu-miR-1197	5.3094459926593	5.49794801546082e-08	2.34212585458631e-05	70	Intestine	7	1	mmu-miR-1197
CAGCAGG	mmu-miR-214/mmu-miR-761	2.37731618677335	0.00871956614660088	1	260	Intestine	2019	0	mmu-miR-214/mmu-miR-761
CCAGCAU	mmu-miR-338-3p	5.09860435485267	1.71083441025867e-07	6.98020439385537e-05	110	Intestine	502	2	mmu-miR-338-3p
GAUCUAG	mmu-miR-344/mmu-miR-344c	2.80399610129382	0.00252367577008195	0.562779696728275	21	Intestine	131	0	mmu-miR-344/mmu-miR-344c
GCAAGGU	mmu-miR-679-3p	3.47732882279978	0.000253218155443053	0.0696349927468396	68	Intestine	1	0	mmu-miR-679-3p
GGACGAG	mmu-miR-1947	0.0641432219971553	0.474428093253538	1	4	Intestine	135	0	mmu-miR-1947
UUCCUGC	mmu-miR-3074-5p	5.85123671099834	2.4396560379869e-09	1.11248315332202e-06	150	Intestine	18	0	mmu-miR-3074-5p
UCCUGGC	mmu-miR-3113	0.169500908072957	0.432701329078391	1	97	Intestine	33	0	mmu-miR-3113
UUGGAGC	mmu-miR-3057-5p	4.68172941269414	1.42232404651023e-06	0.000521978338108956	60	Intestine	113	0	mmu-miR-3057-5p
AACUGCA	mmu-miR-883a-3p/mmu-miR-883b-3p	6.80917781512388	4.90790478661767e-12	2.49321563160178e-09	138	Intestine	1	0	mmu-miR-883a-3p/mmu-miR-883b-3p
ACUCCAU	mmu-miR-880	4.69560734094064	1.32907866619267e-06	0.000494417263823673	57	Intestine	10	0	mmu-miR-880
ACAGAGU	mmu-miR-3082-5p	4.68500728802509	1.39974985485582e-06	0.00051510794658694	105	Intestine	9	0	mmu-miR-3082-5p
AGCUUUU	mmu-miR-208a-5p	7.37406287489957	8.27525355047545e-14	4.41071014240342e-11	174	Intestine	32	0	mmu-miR-208a-5p
AGGUUAC	mmu-miR-872	4.10462534608582	2.02485324568332e-05	0.00639853625635928	46	Intestine	861	0	mmu-miR-872
CCUUCAU	mmu-miR-205	8.72308560889016	1.35360720105588e-18	7.75616926205021e-16	183	Intestine	252	2	mmu-miR-205
GGUGCUA	mmu-miR-3070a/mmu-miR-3070b-3p	1.84716361752151	0.0323617152907305	1	62	Intestine	16	0	mmu-miR-3070a/mmu-miR-3070b-3p
CAUAGCA	mmu-miR-3060	5.08782203510049	1.81099505434703e-07	7.33452997010549e-05	84	Intestine	18	0	mmu-miR-3060
GAAUUGU	mmu-miR-219-3p	4.46271892142168	4.04630894424994e-06	0.00138383765893348	44	Intestine	7	1	mmu-miR-219-3p
GAGUAUU	mmu-miR-496	2.63749283252749	0.00417606952758172	0.893678878902488	40	Intestine	77	1	mmu-miR-496
UAGUUGU	mmu-miR-669c	4.41588074082241	5.02997697226772e-06	0.00169510223965422	58	Intestine	57	0	mmu-miR-669c
UUAGGCA	mmu-miR-1948	7.42809893450033	5.50847734483516e-14	2.94152690214198e-11	102	Intestine	29	0	mmu-miR-1948
UACCUUU	mmu-miR-3061-3p	8.60914605731074	3.68034091561768e-18	2.09411398098646e-15	113	Intestine	25	0	mmu-miR-3061-3p
UGUGUGU	mmu-miR-466l-5p	3.42660571398764	0.000305587904914404	0.0828143222318034	119	Intestine	0	0	mmu-miR-466l-5p
AGGGCCA	mmu-miR-3109	1.28045994966399	0.100191710794894	1	43	Intestine	4	0	mmu-miR-3109
CCUCCAU	mmu-miR-1930	2.31039489881787	0.0104331506284843	1	63	Intestine	7	0	mmu-miR-1930
UCAUAGA	mmu-miR-376b	4.24686942756362	1.08389103885306e-05	0.00352264587627245	73	Intestine	82	1	mmu-miR-376b
AUCACUA	mmu-miR-34b-3p	4.68582083699209	1.39420055941069e-06	0.000514460006422546	52	Intestine	52	0	mmu-miR-34b-3p
CCUGCUG	mmu-miR-370	3.85692022927893	5.74123069874758e-05	0.0171088674822678	125	Intestine	122	1	mmu-miR-370
AUAUCAG	mmu-miR-3074-1-3p	4.26845333935803	9.84164946366806e-06	0.00322806102408312	70	Intestine	11	0	mmu-miR-3074-1-3p
AUGACAC	mmu-miR-425/mmu-miR-489	5.57728426640951	1.22151235531342e-08	5.36243923982591e-06	73	Intestine	16925	2	mmu-miR-425/mmu-miR-489
AUGUGGG	mmu-miR-299	1.09250054280699	0.137306576007999	1	39	Intestine	116	1	mmu-miR-299
GGACACU	mmu-miR-3095-3p	4.61651583364856	1.95118130818705e-06	0.000698522908330963	52	Intestine	49	0	mmu-miR-3095-3p
GGAGCCA	mmu-miR-505-5p	0.561842558940093	0.287111646326388	1	76	Intestine	12	0	mmu-miR-505-5p
GUUGGGG	mmu-miR-3094	1.40730923369352	0.079667856238569	1	29	Intestine	7	0	mmu-miR-3094
AGGUUAU	mmu-miR-154	4.41510567428326	5.04803293469137e-06	0.0016961390660563	53	Intestine	116	1	mmu-miR-154
CCUAACA	mmu-miR-3098-5p	5.6127866985102	9.95469795904960e-09	4.39997649789992e-06	51	Intestine	24	0	mmu-miR-3098-5p
GGGAAAG	mmu-miR-1953	1.5741492869441	0.0577264701631947	1	122	Intestine	28	0	mmu-miR-1953
GUAACAG	mmu-miR-194	8.49417505334533	9.96718359636484e-18	5.66136028273523e-15	162	Intestine	4152073	2	mmu-miR-194
AGUAGAC	mmu-miR-411	3.52323874971896	0.000213153574130068	0.0598961543305491	27	Intestine	1529	1	mmu-miR-411
UUCCUCU	mmu-miR-3059	3.52218400511905	0.000214003478197746	0.0599209738953689	137	Intestine	2	0	mmu-miR-3059
ACUGGCC	mmu-miR-193/mmu-miR-193b	6.84840117721563	3.73399475014582e-12	1.90807131732452e-09	79	Intestine	2182	2	mmu-miR-193/mmu-miR-193b
AGUCAUG	mmu-miR-707	4.16951068323096	1.52627153876064e-05	0.00491459435480926	65	Intestine	5	0	mmu-miR-707
GAGGGGC	mmu-miR-423-5p	-0.107589740840436	0.457160567686445	1	57	Intestine	4034	1	mmu-miR-423-5p
UUGGGAA	mmu-miR-450b-3p	3.98737158245147	3.34046727206425e-05	0.0103554485433992	88	Intestine	20	0	mmu-miR-450b-3p
AGUGCUU	mmu-miR-302c	8.68075588784475	1.96573573287594e-18	1.12243510347216e-15	211	Intestine	23	2	mmu-miR-302c
UGUGCGG	mmu-miR-147	0.368564690444493	0.356226109189557	1	8	Intestine	763	2	mmu-miR-147
UGUGCGU	mmu-miR-210	0.576509766014933	0.282135335365285	1	12	Intestine	975	2	mmu-miR-210
CUCCAUU	mmu-miR-136	4.69491174221396	1.33360928730341e-06	0.000494769045589564	87	Intestine	336	1	mmu-miR-136
GUCUUGU	mmu-miR-669e	4.486667136465	3.61729840225696e-06	0.00124966703035104	49	Intestine	17	0	mmu-miR-669e
GAGAAUG	mmu-miR-3062	6.72723148560551	8.64607654383458e-12	4.34897650154879e-09	99	Intestine	2	0	mmu-miR-3062
AUGUGUA	mmu-miR-511-3p	6.44074411871568	5.94445819548938e-11	2.90684005759431e-08	70	Intestine	190	0	mmu-miR-511-3p
GAUGUGU	mmu-miR-466b-5p/mmu-miR-466c-5p	4.05810397209776	2.47363712835915e-05	0.00776722058304772	33	Intestine	26	0	mmu-miR-466b-5p/mmu-miR-466c-5p
AUGUAGU	mmu-miR-380-3p	5.10243209886638	1.67658035713248e-07	6.85721366067185e-05	61	Intestine	47	0	mmu-miR-380-3p
GUACCAU	mmu-miR-3101	5.64259932985471	8.37509204138315e-09	3.7269159584155e-06	93	Intestine	1	0	mmu-miR-3101
CAAGUGC	mmu-miR-105	7.46480774879427	4.17106610592689e-14	2.23152036667089e-11	132	Intestine	19	0	mmu-miR-105
GAAACAU	mmu-miR-494	9.46001061343428	1.53955975491352e-21	9.05261135889148e-19	175	Intestine	73	1	mmu-miR-494
GACCCUG	mmu-miR-504	2.03192523044559	0.0210806129366801	1	70	Intestine	22	0	mmu-miR-504
GUUGUGU	mmu-miR-669a-5p/mmu-miR-669f-5p/mmu-miR-669l	3.36552432681118	0.000381991650753671	0.101609779100477	42	Intestine	134	0	mmu-miR-669a-5p/mmu-miR-669f-5p/mmu-miR-669l
UGUGUCA	mmu-miR-599	3.70152872369486	0.000107152195120054	0.0311812887799358	62	Intestine	0	0	mmu-miR-599
AUACCUC	mmu-miR-875-5p	3.95431760536131	3.83766986643892e-05	0.0116665163939743	44	Intestine	6	1	mmu-miR-875-5p
AAAGCCU	mmu-miR-3078	7.27863731524594	1.68604445288691e-13	8.90231471124289e-11	126	Intestine	2	0	mmu-miR-3078
GUCACUC	mmu-miR-668	4.9283392536555	4.14657624646509e-07	0.000161716473612138	58	Intestine	48	1	mmu-miR-668
UCUAGCC	mmu-miR-344f-3p	3.96241991332803	3.70969493553132e-05	0.0113145695533705	39	Intestine	7	0	mmu-miR-344f-3p
UUGAACC	mmu-miR-434-3p	4.59090060801712	2.2066874046783e-06	0.000781167341256119	60	Intestine	1859	0	mmu-miR-434-3p
GAAGCGC	mmu-miR-3080-5p	-0.0109170676776272	0.495644806635938	1	7	Intestine	24	0	mmu-miR-3080-5p
UAUAAUA	mmu-miR-374	9.36417633049194	3.83228781007375e-21	2.24572065670322e-18	271	Intestine	3023	1	mmu-miR-374
AGGCUAG	mmu-miR-3099	2.57597254112423	0.0049979292035155	1	38	Intestine	66	0	mmu-miR-3099
AUCCUUU	mmu-miR-501-5p	5.91026070230855	1.70783357711863e-09	7.85603445474569e-07	83	Intestine	64	0	mmu-miR-501-5p
GAUAGAC	mmu-miR-463	2.83094613612418	0.00232052680399734	0.524439057703399	22	Intestine	0	0	mmu-miR-463
GUCAGUC	mmu-miR-344f-5p	5.11405894443832	1.57654446905136e-07	6.4638323231106e-05	91	Intestine	8	0	mmu-miR-344f-5p
GUCAGUU	mmu-miR-223	8.3086985344178	4.83786934377627e-17	2.73339617923359e-14	111	Intestine	1947	2	mmu-miR-223
UUGUUCG	mmu-miR-375	5.61979175124661	9.5593884084887e-09	4.2348090649605e-06	91	Intestine	144543	2	mmu-miR-375
CAGUAAC	mmu-miR-802	6.9347879745132	2.0341543258584e-12	1.04758947781708e-09	128	Intestine	28702	2	mmu-miR-802
UGGGAAC	mmu-miR-3100-5p	1.380051344082	0.0837854183615814	1	48	Intestine	17	0	mmu-miR-3100-5p
CCAGGAG	mmu-miR-665	1.57040170845274	0.0581608426291928	1	115	Intestine	54	1	mmu-miR-665
UUGAUCU	mmu-miR-3079-5p	4.41891278414722	4.9599333099759e-06	0.00167645745877185	72	Intestine	9	0	mmu-miR-3079-5p
UCCUAUG	mmu-miR-202-5p	6.16516093448094	3.52057457182215e-10	1.66171119790005e-07	84	Intestine	4	2	mmu-miR-202-5p
AAUGUUG	mmu-miR-409-3p	3.888432294227	5.04469032020894e-05	0.0151340709606268	95	Intestine	578	1	mmu-miR-409-3p
AUCUAGU	mmu-miR-878-5p	6.40210362280604	7.66252967579178e-11	3.7316519521106e-08	45	Intestine	4	0	mmu-miR-878-5p
AGCUUAU	mmu-miR-21/mmu-miR-590-5p	8.30245212153487	5.09921272060828e-17	2.87595597442307e-14	122	Intestine	1214967	2	mmu-miR-21/mmu-miR-590-5p
ACUCCAG	mmu-miR-509-5p	3.66313025401714	0.00012457588102244	0.0358778537344627	71	Intestine	2	0	mmu-miR-509-5p
CCCUCAG	mmu-miR-760-5p	1.82649341684728	0.033887985989915	1	62	Intestine	68	0	mmu-miR-760-5p
UGGUUGC	mmu-miR-3066	3.17783887028565	0.000741885926143464	0.185471481535866	54	Intestine	31	0	mmu-miR-3066
GAGAUGA	mmu-miR-143	4.53070297408117	2.9393871401209e-06	0.00102584611190219	138	Intestine	5595483	2	mmu-miR-143
AUGUGUG	mmu-miR-1187/mmu-miR-466a-5p	4.69266205894301	1.34836378793315e-06	0.000498894601535265	62	Intestine	9	0	mmu-miR-1187/mmu-miR-466a-5p
GGUAGAC	mmu-miR-379/mmu-miR-1193-5p	5.64140730509203	8.43329183184722e-09	3.74438157334017e-06	39	Intestine	371	1	mmu-miR-379/mmu-miR-1193-5p
AGCUUUC	mmu-miR-3095-5p	7.78123604746065	3.59096733604386e-15	1.98580493683226e-12	116	Intestine	7	0	mmu-miR-3095-5p
CCCAGGU	mmu-miR-3090	0.460339413673724	0.32263630748934	1	63	Intestine	8	0	mmu-miR-3090
ACCCGUA	mmu-miR-99a/mmu-miR-100/mmu-miR-99b	0.208498859296534	0.417419736608734	1	22	Intestine	65751	2	mmu-miR-99a/mmu-miR-100/mmu-miR-99b
AACACUG	mmu-miR-141/mmu-miR-200a	11.480319773343	8.28333346009821e-31	5.0942500779604e-28	319	Intestine	593155	2	mmu-miR-141/mmu-miR-200a
GCAGAGG	mmu-miR-298	1.09856141573354	0.135979707651053	1	152	Intestine	88	0	mmu-miR-298
GGAUUUC	mmu-miR-876-5p	4.48699405797028	3.61175442297988e-06	0.00124966703035104	75	Intestine	3	1	mmu-miR-876-5p
AGGGAUU	mmu-miR-541	3.92539987562422	4.3292890072994e-05	0.0131177456921172	39	Intestine	6945	0	mmu-miR-541
AGUGGGC	mmu-miR-3061-5p	0.537437746596743	0.295482637848069	1	25	Intestine	31	0	mmu-miR-3061-5p
UGACUCC	mmu-miR-3077	1.70515600539794	0.0440826663485582	1	35	Intestine	3	0	mmu-miR-3077
AAUGGGG	mmu-miR-3092	0.998112764900124	0.159112340483936	1	38	Intestine	11	0	mmu-miR-3092
AGGCUCA	mmu-miR-3079-3p	5.1219163790887	1.51223008896176e-07	6.21526566563282e-05	113	Intestine	5	0	mmu-miR-3079-3p
AACGGAA	mmu-miR-191	1.61676025991618	0.0529650203428737	1	24	Intestine	451831	2	mmu-miR-191
GUGACUG	mmu-miR-134	4.73684669906729	1.08534619660232e-06	0.000408090169922472	44	Intestine	200	1	mmu-miR-134
CAGGACC	mmu-miR-1933-3p	0.260642424855763	0.39718413492409	1	40	Intestine	17	0	mmu-miR-1933-3p
AGCUAGC	mmu-miR-1198-3p	3.02296818472645	0.00125154278753965	0.297867183434436	32	Intestine	16	0	mmu-miR-1198-3p
AUCAGGG	mmu-miR-465a-3p	3.03624534736489	0.0011977217887666	0.289848672881518	24	Intestine	6	0	mmu-miR-465a-3p
UGUAUGU	mmu-miR-297b-5p/mmu-miR-297a/mmu-miR-297c	7.31391584734313	1.29733837019555e-13	6.88886674573836e-11	57	Intestine	22	0	mmu-miR-297b-5p/mmu-miR-297a/mmu-miR-297c
AACCUCU	mmu-miR-3103	3.3248223121054	0.000442374511980771	0.116344496650943	48	Intestine	13	0	mmu-miR-3103
UAGACUG	mmu-miR-151-3p	3.26960388789519	0.000538490908778356	0.137853672647259	35	Intestine	57897	1	mmu-miR-151-3p
GAGGAAU	mmu-miR-3063	3.30216648215139	0.000479705539150678	0.124723440179176	86	Intestine	8	0	mmu-miR-3063
GGGUACA	mmu-miR-1b-3p	2.61077941837986	0.00451680702784161	0.962079896930263	39	Intestine	4	0	mmu-miR-1b-3p
GCGGGGC	mmu-miR-744	-2.01253355365074	0.0220818616723181	1	6	Intestine	1947	1	mmu-miR-744
GUGGACA	mmu-miR-3093-3p	1.92193597320917	0.0273069073296748	1	52	Intestine	8	0	mmu-miR-3093-3p
UGCAUGG	mmu-miR-669h-5p	6.51338892644043	3.6736970776597e-11	1.81848005344155e-08	76	Intestine	0	0	mmu-miR-669h-5p
AUCCUUG	mmu-miR-362-5p	5.24428698361447	7.84439217587342e-08	3.31817789039446e-05	48	Intestine	659	1	mmu-miR-362-5p
UGCGCUC	mmu-miR-3081	0.15566283934543	0.438149394971537	1	4	Intestine	55	0	mmu-miR-3081
AUCCCUU	mmu-miR-188-5p	4.75144551251043	1.00983793167433e-06	0.000380708900241223	74	Intestine	174	1	mmu-miR-188-5p
UGUGACA	mmu-miR-3100-3p	4.21263473740671	1.26204528250959e-05	0.00408902671533107	85	Intestine	3	0	mmu-miR-3100-3p
GGGCCCC	mmu-miR-296-5p	-3.60405935580311	0.000156642730828043	0.0443298928243361	53	Intestine	37	1	mmu-miR-296-5p
AGGGUUG	mmu-miR-296-3p	2.28577610401115	0.0111336801700709	1	14	Intestine	31	1	mmu-miR-296-3p
GAAGGUC	mmu-miR-493	4.10644198982316	2.00900155026697e-05	0.00636853491434629	44	Intestine	21	1	mmu-miR-493
CCAAUGA	mmu-miR-3086-3p	4.30140088205413	8.48608448902213e-06	0.00279192179688828	64	Intestine	15	0	mmu-miR-3086-3p
GAGAGAU	mmu-miR-741	1.35535704873428	0.0876519135542809	1	47	Intestine	0	0	mmu-miR-741
CUCUAGC	mmu-miR-1251	4.81260200777399	7.44888935697974e-07	0.000283530107043995	44	Intestine	4	1	mmu-miR-1251
AUGGGUC	mmu-miR-3091-5p	0.445240899806233	0.328072836307113	1	18	Intestine	52	0	mmu-miR-3091-5p
AACCGUU	mmu-miR-451	2.22017335579409	0.0132035011113823	1	8	Intestine	25343	2	mmu-miR-451
CGUACCG	mmu-miR-126-3p	2.6713899015578	0.00377689240494529	0.819585651873129	16	Intestine	17548	2	mmu-miR-126-3p
GCGGGCA	mmu-miR-666-5p	-0.394716111364233	0.346526205561468	1	5	Intestine	86	0	mmu-miR-666-5p
GGUGCGG	mmu-miR-675-5p	-0.188388791195708	0.42528594285917	1	2	Intestine	3	0	mmu-miR-675-5p
AUGCCUU	mmu-miR-532-5p	5.08650349861867	1.82362497693755e-07	7.36744490682772e-05	75	Intestine	7986	1	mmu-miR-532-5p
GAUCGAC	mmu-miR-369-5p	1.06807168737904	0.142744088028711	1	3	Intestine	42	0	mmu-miR-369-5p
GGUCGAC	mmu-miR-412-5p	2.1685401982002	0.0150588047929171	1	2	Intestine	7	1	mmu-miR-412-5p
UUUGCGA	mmu-miR-450a	-0.104178331035225	0.458513914859466	1	4	Intestine	411	1	mmu-miR-450a
CGCCCUU	mmu-miR-1249	0.483217699955385	0.314470584481634	1	5	Intestine	415	1	mmu-miR-1249
AUCGUAC	mmu-miR-487b	1.70789737812689	0.0438276928887346	1	8	Intestine	35	1	mmu-miR-487b
CGCUCUG	mmu-miR-3104-3p	1.29020232740635	0.098490209141001	1	6	Intestine	3	0	mmu-miR-3104-3p
CGACUUC	mmu-miR-1964-3p	0.700762262180217	0.241725696372397	1	4	Intestine	97	0	mmu-miR-1964-3p
ACGUCAU	mmu-miR-598	1.42320299395734	0.0773386589771705	1	6	Intestine	742	0	mmu-miR-598
CGGAUCC	mmu-miR-127	1.6050925776003	0.0542367162578927	1	6	Intestine	21150	1	mmu-miR-127
CUCGACU	mmu-miR-434-5p	NA	NA	NA	0	Intestine	746	0	mmu-miR-434-5p
CGUCCUG	mmu-miR-676	-0.873154328228174	0.191289482472306	1	6	Intestine	1066	0	mmu-miR-676
UCGUAGA	mmu-miR-376a	0.0215569007972409	0.491400706857933	1	1	Intestine	82	0	mmu-miR-376a
CGUGUGU	mmu-miR-466f	0.736758139374314	0.230634721907909	1	4	Intestine	6	0	mmu-miR-466f
GUGCCGC	mmu-miR-293	2.08139572222358	0.0186988499552836	1	2	Intestine	21	0	mmu-miR-293
CAUCCGG	mmu-miR-5103	0.358848216291826	0.359854320128433	1	1	Intestine	59	0	mmu-miR-5103
ACGCUCA	mmu-miR-574-3p	-0.0115941470725949	0.49537470815301	1	4	Intestine	3459	0	mmu-miR-574-3p
CCCGUCC	mmu-miR-1247	0.138694200997906	0.444845900371801	1	3	Intestine	60	0	mmu-miR-1247
CGAGGAG	mmu-miR-151-5p	1.16305094295175	0.122404417063152	1	4	Intestine	17052	1	mmu-miR-151-5p
CCGAGCC	mmu-miR-615-3p	-0.579476365768216	0.281133894665237	1	1	Intestine	116	1	mmu-miR-615-3p
ACGUAGU	mmu-miR-471-5p	0.0382740396933897	0.484734594469645	1	2	Intestine	0	0	mmu-miR-471-5p
CCUCGGG	mmu-miR-3080-3p	0.535532675179361	0.296140784607198	1	4	Intestine	5	0	mmu-miR-3080-3p
CGUGUCU	mmu-miR-187	2.04203952306886	0.0205738055099388	1	5	Intestine	98	2	mmu-miR-187
GAGCGCC	mmu-miR-339-3p	-0.0260855776316121	0.489594540266048	1	5	Intestine	241	0	mmu-miR-339-3p
GCUCGGU	mmu-miR-423-3p	0.192715990781746	0.423590699688636	1	4	Intestine	4715	1	mmu-miR-423-3p
CGACCCA	mmu-miR-551b	-0.201700119017741	0.420075584774658	1	3	Intestine	21	2	mmu-miR-551b
AUGGCGC	mmu-miR-652	2.05178426659458	0.02009531650698	1	2	Intestine	4415	1	mmu-miR-652
CCGGUUC	mmu-miR-671-3p	1.51455063120303	0.0649431212898067	1	4	Intestine	173	0	mmu-miR-671-3p
AGACGGG	mmu-miR-483	0.33538283892774	0.368668155824437	1	1	Intestine	12	0	mmu-miR-483
UAGCCGC	mmu-miR-701	-0.00274441833222337	0.498905136866555	1	1	Intestine	11	0	mmu-miR-701
ACGCGGG	mmu-miR-700	-1.25149044588172	0.105377798621701	1	1	Intestine	112	0	mmu-miR-700
AAAGUGC	mmu-miR-106a/mmu-miR-17/mmu-miR-106b/mmu-miR-20a/mmu-miR-93/mmu-miR-20b	10.0269775554323	5.80067765850147e-24	3.60222082592941e-21	729	Liver	31271	2	mmu-miR-106a/mmu-miR-17/mmu-miR-106b/mmu-miR-20a/mmu-miR-93/mmu-miR-20b
AAGUGCU	mmu-miR-302a/mmu-miR-291a-3p/mmu-miR-294/mmu-miR-295/mmu-miR-302d/mmu-miR-302b	8.24179579736519	8.48224614717913e-17	5.13175891904338e-14	444	Liver	122	2	mmu-miR-302a/mmu-miR-291a-3p/mmu-miR-294/mmu-miR-295/mmu-miR-302d/mmu-miR-302b
AAGUUGU	mmu-miR-382	3.11491740631227	0.000919982112795375	0.243795259890774	87	Liver	14	1	mmu-miR-382
ACACACC	mmu-miR-329/mmu-miR-362-3p	4.69432699488875	1.3374293673192e-06	0.000615217508966833	147	Liver	413	1	mmu-miR-329/mmu-miR-362-3p
ACAUACA	mmu-miR-466m-3p/mmu-miR-466o-3p	5.95648378345039	1.28861336220422e-09	7.0873734921232e-07	363	Liver	1	0	mmu-miR-466m-3p/mmu-miR-466o-3p
ACAUUCA	mmu-miR-181a/mmu-miR-181c/mmu-miR-181d/mmu-miR-181b	8.63925678473596	2.82899384278529e-18	1.72851523794181e-15	623	Liver	44119	2	mmu-miR-181a/mmu-miR-181c/mmu-miR-181d/mmu-miR-181b
AGUUGUG	mmu-miR-669o-5p	2.72487627604635	0.00321627934240378	0.691500058616813	75	Liver	9	0	mmu-miR-669o-5p
AUACAUA	mmu-miR-297b-3p/mmu-miR-467g/mmu-miR-466a-3p/mmu-miR-466d-3p	5.73814929209774	4.78583626261428e-09	2.5460648917108e-06	508	Liver	40	0	mmu-miR-297b-3p/mmu-miR-467g/mmu-miR-466a-3p/mmu-miR-466d-3p
AUAUACA	mmu-miR-669f-3p	6.69525135418409	1.07650618850893e-11	6.14685033638598e-09	869	Liver	7	0	mmu-miR-669f-3p
CCCCUGG	mmu-miR-331-3p	3.8090530288269	6.97500199718381e-05	0.0262260075094111	79	Liver	263	1	mmu-miR-331-3p
CUGGCUG	mmu-miR-3085-3p/mmu-miR-3064-5p	5.26013509156641	7.19748025959958e-08	3.58434516928059e-05	181	Liver	4	1	mmu-miR-3085-3p/mmu-miR-3064-5p
CUGGUCC	mmu-miR-1934	3.25352931335606	0.000569904824277799	0.16299277974345	140	Liver	6	0	mmu-miR-1934
CUUUGGU	mmu-miR-9	9.23927596847141	1.24085397475606e-20	7.61884340500219e-18	749	Liver	172	2	mmu-miR-9
GAUUGUC	mmu-miR-219-5p	5.5920512933334	1.12201250240704e-08	5.86812538758881e-06	229	Liver	930	2	mmu-miR-219-5p
GCACCAC	mmu-miR-770-5p	4.98921955053484	3.03118579383699e-07	0.000144890680945408	146	Liver	6	0	mmu-miR-770-5p
GCAGCUG	mmu-miR-1968	2.90867549982425	0.00181481694738199	0.430111616529531	241	Liver	69	0	mmu-miR-1968
GCCCCCU	mmu-miR-3072	1.54091607499805	0.0616686064805854	1	42	Liver	2	0	mmu-miR-3072
GCUGGAG	mmu-miR-1964-5p	2.83075382404322	0.00232192240499734	0.527076385934396	122	Liver	36	0	mmu-miR-1964-5p
GGCAGUG	mmu-miR-34a/mmu-miR-449a/mmu-miR-449c/mmu-miR-34b-5p/mmu-miR-34c/mmu-miR-449b	6.45494582345478	5.41288119358311e-11	3.06910363676163e-08	315	Liver	4995	2	mmu-miR-34a/mmu-miR-449a/mmu-miR-449c/mmu-miR-34b-5p/mmu-miR-34c/mmu-miR-449b
GUGGGGA	mmu-miR-491	1.81032794397415	0.035122473045338	1	61	Liver	10	1	mmu-miR-491
UACAUAC	mmu-miR-466b-3p	6.08878696865551	5.68846909534664e-10	3.16847728610808e-07	341	Liver	20	0	mmu-miR-466b-3p
UCUGCCU	mmu-miR-3110	3.00652089617926	0.00132127945291966	0.334283701588675	128	Liver	19	0	mmu-miR-3110
UGUGCUU	mmu-miR-218	6.99966515674405	1.28287483080179e-12	7.47916026357443e-10	474	Liver	66	2	mmu-miR-218
UUAUUGA	mmu-miR-325	3.66569106971729	0.000123335779520354	0.0426741797140424	1125	Liver	0	1	mmu-miR-325
UUGGCAA	mmu-miR-182	7.08021251630263	7.19667807495154e-13	4.22445002999655e-10	620	Liver	53163	2	mmu-miR-182
UUGGCAC	mmu-miR-96	7.78900490785135	3.37694918719351e-15	2.02279256312891e-12	600	Liver	271	2	mmu-miR-96
AACAUCC	mmu-miR-448-5p	3.36324475031693	0.000385160178339358	0.115933213680147	95	Liver	2	0	mmu-miR-448-5p
AACAUUC	mmu-miR-543	6.32058317100633	1.30289017842423e-10	7.33527170452843e-08	319	Liver	5	1	mmu-miR-543
AGGUCAC	mmu-miR-1193-3p	5.18414299373366	1.08505197241383e-07	5.37100726344843e-05	125	Liver	3	1	mmu-miR-1193-3p
AGUGGUU	mmu-miR-876-3p/mmu-miR-140	5.57849538291206	1.21303957027542e-08	6.33206655683771e-06	161	Liver	2350	2	mmu-miR-876-3p/mmu-miR-140
CCAGUGU	mmu-miR-199a-5p	4.95674632903704	3.58417343460321e-07	0.000170606655487113	252	Liver	3179	2	mmu-miR-199a-5p
CCCUGAG	mmu-miR-125a-5p/mmu-miR-351/mmu-miR-125b-5p	5.90531258116269	1.75989365131919e-09	9.60901933620276e-07	462	Liver	31596	2	mmu-miR-125a-5p/mmu-miR-351/mmu-miR-125b-5p
CCCUGUC	mmu-miR-339-5p	3.67679045955839	0.000118093446888397	0.0410965195171622	86	Liver	1209	1	mmu-miR-339-5p
GAGAACU	mmu-miR-146a/mmu-miR-146b	1.95874487545552	0.0250713360895253	1	101	Liver	96163	2	mmu-miR-146a/mmu-miR-146b
GAGGUAG	mmu-miR-1961/mmu-let-7g/mmu-miR-98/mmu-let-7a/mmu-let-7b/mmu-let-7i/mmu-let-7d/mmu-let-7f/mmu-let-7e/mmu-let-7c	8.36887982077077	2.90842687882774e-17	1.76541511544844e-14	635	Liver	605133	2	mmu-miR-1961/mmu-let-7g/mmu-miR-98/mmu-let-7a/mmu-let-7b/mmu-let-7i/mmu-let-7d/mmu-let-7f/mmu-let-7e/mmu-let-7c
GAGGUAU	mmu-miR-202-3p	8.7585152407387	9.89194882838924e-19	6.05387268297421e-16	443	Liver	2759	0	mmu-miR-202-3p
UCCCUGA	mmu-miR-670	4.09064694405121	2.15085778394368e-05	0.00866795686929302	370	Liver	2	0	mmu-miR-670
AUUUAGA	mmu-miR-465a-5p/mmu-miR-465b-5p/mmu-miR-465c-5p	4.0549416380948	2.50734108037843e-05	0.0100293643215137	221	Liver	43	0	mmu-miR-465a-5p/mmu-miR-465b-5p/mmu-miR-465c-5p
AUUCAUU	mmu-miR-664	4.4132947240704	5.09046246284243e-06	0.00223471302118783	249	Liver	625	0	mmu-miR-664
GGUGUGA	mmu-miR-1188	2.49130743714319	0.00636369684945916	1	65	Liver	10	0	mmu-miR-1188
AUAAAUA	mmu-miR-466l-3p	9.65522959892047	2.33555863692063e-22	1.43870412034311e-19	1809	Liver	2	0	mmu-miR-466l-3p
GGUCAGA	mmu-miR-540-3p	5.13951737841807	1.37722508885027e-07	6.77594743714333e-05	130	Liver	36	0	mmu-miR-540-3p
UAAUACA	mmu-miR-374c	6.76745194844307	6.55350799718689e-12	3.77482060637965e-09	453	Liver	0	1	mmu-miR-374c
AACAAAC	mmu-miR-1192/mmu-miR-495	7.19547192857898	3.1122546194109e-13	1.83934248007184e-10	447	Liver	14	1	mmu-miR-1192/mmu-miR-495
AAGGCAC	mmu-miR-124	9.78955463018863	6.24222879726377e-23	3.85769739670901e-20	1016	Liver	24	2	mmu-miR-124
AAUACUG	mmu-miR-200b/mmu-miR-429/mmu-miR-200c	9.12515438393462	3.58170429354608e-20	2.19558473194374e-17	607	Liver	3788	2	mmu-miR-200b/mmu-miR-429/mmu-miR-200c
ACAAUAU	mmu-miR-338-5p	6.15605431332755	3.7289827772305e-10	2.08823035524908e-07	469	Liver	64	0	mmu-miR-338-5p
ACAGUAC	mmu-miR-101a/mmu-miR-101b	9.27893937263863	8.55869761449699e-21	5.26359903291565e-18	417	Liver	159339	2	mmu-miR-101a/mmu-miR-101b
ACAGUAU	mmu-miR-144	7.96959236196454	7.9599305560836e-16	4.79983812531841e-13	445	Liver	3112	2	mmu-miR-144
ACCCUGU	mmu-miR-10a/mmu-miR-10b	4.5087412491543	3.26066925422285e-06	0.00145751915663761	141	Liver	3052128	2	mmu-miR-10a/mmu-miR-10b
ACUGUGU	mmu-miR-881	3.60311087395893	0.000157215662808857	0.0529816783665847	111	Liver	3	0	mmu-miR-881
AGGAAAG	mmu-miR-1958	5.00542539374359	2.78693992899978e-07	0.00013377311659199	247	Liver	8	0	mmu-miR-1958
AUAUAAC	mmu-miR-344d/mmu-miR-410/mmu-miR-344e	5.87089786229413	2.16720627746506e-09	1.17679300866353e-06	344	Liver	102	1	mmu-miR-344d/mmu-miR-410/mmu-miR-344e
AUUCAGA	mmu-miR-871-5p	3.71587531850212	0.000101250713728516	0.0364502569422658	209	Liver	88	0	mmu-miR-871-5p
AUUGCAC	mmu-miR-25/mmu-miR-92a/mmu-miR-363-3p/mmu-miR-367/mmu-miR-32/mmu-miR-92b	10.2788288632311	4.38939053129772e-25	2.73020091046718e-22	500	Liver	161387	2	mmu-miR-25/mmu-miR-92a/mmu-miR-363-3p/mmu-miR-367/mmu-miR-32/mmu-miR-92b
CACAGUG	mmu-miR-128	8.48899638672123	1.04214601636288e-17	6.34666923964996e-15	590	Liver	334	2	mmu-miR-128
CAGUGCA	mmu-miR-148a/mmu-miR-148b/mmu-miR-152	9.69187304889018	1.63242681374823e-22	1.00720734408266e-19	363	Liver	5844590	2	mmu-miR-148a/mmu-miR-148b/mmu-miR-152
CAGUGCU	mmu-miR-1960	8.50669001392602	8.94845947117818e-18	5.45856027741869e-15	287	Liver	12	0	mmu-miR-1960
CAUGGAU	mmu-miR-490-5p	1.30363883869659	0.0961783758956824	1	61	Liver	9	0	mmu-miR-490-5p
CUACAGU	mmu-miR-139-5p	3.57160693306506	0.000177398814958238	0.0590738053810932	178	Liver	2708	2	mmu-miR-139-5p
GCUACAU	mmu-miR-222/mmu-miR-1928/mmu-miR-221	4.34863807798676	6.84927803853372e-06	0.0029451895565695	209	Liver	7311	2	mmu-miR-222/mmu-miR-1928/mmu-miR-221
GGUUACC	mmu-miR-409-5p	2.54329948229244	0.00549055322818708	1	68	Liver	23	1	mmu-miR-409-5p
GUAAACA	mmu-miR-30b/mmu-miR-30a/mmu-miR-30e/mmu-miR-384-5p/mmu-miR-30c/mmu-miR-30d	13.3196580790148	8.89602333246742e-41	5.56891060612461e-38	810	Liver	3251865	2	mmu-miR-30b/mmu-miR-30a/mmu-miR-30e/mmu-miR-384-5p/mmu-miR-30c/mmu-miR-30d
GUGUGUG	mmu-miR-466k/mmu-miR-466i-5p/mmu-miR-466d-5p	4.46520626145821	3.99958252272827e-06	0.00177581464009135	206	Liver	11	0	mmu-miR-466k/mmu-miR-466i-5p/mmu-miR-466d-5p
UAGAGGA	mmu-miR-877	2.69445935160292	0.00352514628028758	0.737091117308443	54	Liver	14	1	mmu-miR-877
UCAAGUA	mmu-miR-26b/mmu-miR-26a	11.3392401668003	4.19347415700932e-30	2.62092134813082e-27	545	Liver	730626	2	mmu-miR-26b/mmu-miR-26a
UCACAGC	mmu-miR-673-5p	8.21031095415138	1.10308200773837e-16	6.66261532673977e-14	491	Liver	23	0	mmu-miR-673-5p
UCACAGU	mmu-miR-27a/mmu-miR-27b	9.85190819851	3.36273882144086e-23	2.08153533047189e-20	678	Liver	203822	2	mmu-miR-27a/mmu-miR-27b
UGCAGUC	mmu-miR-682	3.0365595898641	0.00119647402058195	0.308690297310143	109	Liver	2	2	mmu-miR-682
GCCACAC	mmu-miR-3064-3p	3.18689489263584	0.000719045125453122	0.198456454625062	96	Liver	5	0	mmu-miR-3064-3p
CUUGUGU	mmu-miR-669d	3.55297473822019	0.00019045052055382	0.0630391223033144	65	Liver	14	0	mmu-miR-669d
UAUUGCU	mmu-miR-137	7.805077404241	2.97325182961721e-15	1.78395109777032e-12	622	Liver	429	2	mmu-miR-137
AAUGCCC	mmu-miR-365	6.01937981829848	8.75432981172926e-10	4.84114438588628e-07	152	Liver	5276	2	mmu-miR-365
ACAUAGA	mmu-miR-376c	2.84389955380889	0.00222825473294827	0.512498588578101	118	Liver	20	1	mmu-miR-376c
AGGGAGG	mmu-miR-1943	4.38238819319017	5.8692705318929e-06	0.00254034802028511	112	Liver	217	0	mmu-miR-1943
AUAAAGU	mmu-miR-142-5p	5.73403651685756	4.90341014537952e-09	2.60371078719653e-06	415	Liver	10508	2	mmu-miR-142-5p
CAGUAGU	mmu-miR-199a-3p	5.15755425896104	1.2509818019786e-07	6.17985010177429e-05	236	Liver	27861	2	mmu-miR-199a-3p
GUAGUGU	mmu-miR-142-3p	5.12986678413477	1.44973647928839e-07	7.11820611330601e-05	205	Liver	2047	2	mmu-miR-142-3p
AGCACCC	mmu-miR-3102	7.05615619889605	8.5585704839258e-13	5.01532230358052e-10	312	Liver	42	0	mmu-miR-3102
AUACAAG	mmu-miR-539-3p/mmu-miR-381	5.94532453669919	1.37954828843691e-09	7.57372010351866e-07	490	Liver	117	1	mmu-miR-539-3p/mmu-miR-381
CCUGUAC	mmu-miR-3107	3.17374907326591	0.000752418626555959	0.205410285049777	66	Liver	786690	1	mmu-miR-3107
GCUGAGA	mmu-miR-883a-5p	3.47843748867316	0.00025217302775433	0.0809475419091401	137	Liver	0	0	mmu-miR-883a-5p
AAAGCUG	mmu-miR-320	6.07255816862811	6.29442374157914e-10	3.499699600318e-07	355	Liver	2589	1	mmu-miR-320
ACAUGGC	mmu-miR-3082-3p	3.0056947487014	0.00132487426917066	0.334283701588675	133	Liver	680	0	mmu-miR-3082-3p
AAAGACA	mmu-miR-743a/mmu-miR-743b-3p	5.92243255948192	1.58606955005954e-09	8.6916611343263e-07	332	Liver	1	0	mmu-miR-743a/mmu-miR-743b-3p
AAAUCUU	mmu-miR-1264-3p	5.03128112733001	2.43606553784798e-07	0.000117418358924273	291	Liver	9	0	mmu-miR-1264-3p
AGAUUGU	mmu-miR-3086-5p	3.00090938912375	0.00134587325007647	0.336093045418648	107	Liver	32	0	mmu-miR-3086-5p
AGCACCA	mmu-miR-29a/mmu-miR-29b/mmu-miR-29c	9.89205775926292	2.25333747491067e-23	1.39706923444461e-20	611	Liver	87971	2	mmu-miR-29a/mmu-miR-29b/mmu-miR-29c
AGGUAGU	mmu-miR-196b/mmu-miR-196a	2.96997631868022	0.00148911353341035	0.363343702152126	147	Liver	32	2	mmu-miR-196b/mmu-miR-196a
CAACAAA	mmu-miR-3065	6.66365299948224	1.33551849886837e-11	7.61245544354968e-09	323	Liver	11	0	mmu-miR-3065
CAAGAGC	mmu-miR-335-5p	3.32669092492845	0.000439418958263669	0.130068011646046	110	Liver	3789	1	mmu-miR-335-5p
CUGGCUC	mmu-miR-149	4.28809753993999	9.01049802225193e-06	0.00380243016539031	182	Liver	130	1	mmu-miR-149
GCAUCUG	mmu-miR-3089-3p	3.79496175526085	7.38331083986981e-05	0.0276874156495118	137	Liver	8	0	mmu-miR-3089-3p
GGAGAGA	mmu-miR-185/mmu-miR-882/mmu-miR-3473	3.75036968502993	8.82870261695218e-05	0.032313051578045	92	Liver	1388	1	mmu-miR-185/mmu-miR-882/mmu-miR-3473
GGCUCAG	mmu-miR-24	6.84601954866633	3.79665536311193e-12	2.20206011060492e-09	315	Liver	47927	2	mmu-miR-24
GGCUCAU	mmu-miR-3106	5.51663447150272	1.72776553154996e-08	8.91527014279778e-06	191	Liver	0	0	mmu-miR-3106
GUGACAG	mmu-miR-542-3p	3.23572335949264	0.00060667457299702	0.170475555012163	102	Liver	1447	1	mmu-miR-542-3p
UCACAUU	mmu-miR-23a/mmu-miR-23b	8.2600699226131	7.27935790853934e-17	4.41129089257484e-14	575	Liver	34189	2	mmu-miR-23a/mmu-miR-23b
UGCAUUG	mmu-miR-33	5.04616971062093	2.25377529844548e-07	0.000108857346914917	178	Liver	1106	2	mmu-miR-33
UCCCUUU	mmu-miR-211/mmu-miR-204	7.95498650517654	8.95755172782752e-16	5.39244614015217e-13	295	Liver	91	2	mmu-miR-211/mmu-miR-204
AAUCUCA	mmu-miR-216a	3.78103434421161	7.8089062361023e-05	0.0288929530735785	108	Liver	13	2	mmu-miR-216a
AUACAUG	mmu-miR-466n-3p	5.3762044434648	3.80362050010751e-08	1.93604283455472e-05	367	Liver	1	0	mmu-miR-466n-3p
CUGAGUC	mmu-miR-1199	3.10786671243065	0.00094221517540859	0.247802591132459	103	Liver	22	0	mmu-miR-1199
GAGAAAU	mmu-miR-539-5p	5.26934017036224	6.84575134514014e-08	3.42287567257007e-05	286	Liver	26	0	mmu-miR-539-5p
GCACCCC	mmu-miR-3093-5p	2.20476837035347	0.0137351763165063	1	63	Liver	8	0	mmu-miR-3093-5p
UAUACAU	mmu-miR-669m-3p	6.73175535795933	8.38141605459535e-12	4.81931423139232e-09	561	Liver	7	0	mmu-miR-669m-3p
CACUGAG	mmu-miR-674/mmu-miR-3473d	4.70207091798749	1.28768006790949e-06	0.000594908191374186	157	Liver	402	0	mmu-miR-674/mmu-miR-3473d
CUGGACU	mmu-miR-378	3.77216685361974	8.09179851615418e-05	0.0296969005542859	72	Liver	189293	1	mmu-miR-378
GUCAACA	mmu-miR-505-3p	3.92923727040953	4.2607862573458e-05	0.0164892428159283	105	Liver	80	1	mmu-miR-505-3p
GUUCUCA	mmu-miR-3067	2.8244110329706	0.00236837982436766	0.533124531110883	104	Liver	10	0	mmu-miR-3067
UCCAGUU	mmu-miR-145	6.70654197510712	9.96452702537363e-12	5.70967398553909e-09	365	Liver	7678	2	mmu-miR-145
UGAUGUC	mmu-miR-3073-3p	3.77526328188863	7.99193755889479e-05	0.0294103302167328	55	Liver	104	0	mmu-miR-3073-3p
GGAAUGU	mmu-miR-1a/mmu-miR-206	7.04171485427914	9.49440618878654e-13	5.55422762044013e-10	465	Liver	116	2	mmu-miR-1a/mmu-miR-206
GGUGCCA	mmu-miR-3085-5p	2.71381200060792	0.00332569506339362	0.707660508789455	77	Liver	2	0	mmu-miR-3085-5p
UGGUCAC	mmu-miR-3073-5p	4.86723822599779	5.65842914670297e-07	0.00026764369863905	184	Liver	34	0	mmu-miR-3073-5p
UUGGUCC	mmu-miR-133a/mmu-miR-133b	7.4716059956555	3.96109581172386e-14	2.35289091216397e-11	365	Liver	1	2	mmu-miR-133a/mmu-miR-133b
UAAAGGC	mmu-miR-1971/mmu-miR-1981	5.71483805935394	5.49042724385018e-09	2.90443601199674e-06	196	Liver	166	0	mmu-miR-1971/mmu-miR-1981
AAAGAAU	mmu-miR-186	5.52844087607485	1.61544636781437e-08	8.35185772160027e-06	372	Liver	23165	1	mmu-miR-186
AGCAGCG	mmu-miR-503	5.64109813156837	8.44845104863847e-09	4.4354368005352e-06	194	Liver	44	1	mmu-miR-503
GAGGCUG	mmu-miR-1962/mmu-miR-485	5.43851513913569	2.68632226833628e-08	1.38345596819318e-05	138	Liver	31	1	mmu-miR-1962/mmu-miR-485
ACAUUAC	mmu-miR-323-3p	5.43060006706789	2.80824375943064e-08	1.44062904858792e-05	276	Liver	83	1	mmu-miR-323-3p
AGGCUCU	mmu-miR-344g-3p	2.68073382083894	0.00367304615861238	0.763993600991375	74	Liver	31	0	mmu-miR-344g-3p
AUUAUUA	mmu-miR-126-5p	3.20937490514676	0.000665119585368001	0.184316589604791	273	Liver	210804	0	mmu-miR-126-5p
CAGCCAC	mmu-miR-3058	1.89251817260033	0.0292109873547455	1	129	Liver	13	0	mmu-miR-3058
CAGUCUC	mmu-miR-452-3p	4.09679530249665	2.09454505719291e-05	0.00846196203105936	141	Liver	0	1	mmu-miR-452-3p
CCUUGGC	mmu-miR-212-5p	4.55787224115659	2.58372265146299e-06	0.00116267519315835	135	Liver	66	2	mmu-miR-212-5p
GAAAGGU	mmu-miR-471-3p	4.11851881965903	1.90657716535345e-05	0.00774070329133501	119	Liver	1	0	mmu-miR-471-3p
GAGCAAG	mmu-miR-3105-5p	3.8655179983547	5.54268366670542e-05	0.0211176247701476	114	Liver	36	0	mmu-miR-3105-5p
GCCCCUG	mmu-miR-3070b-5p	1.27865810482995	0.100508739470058	1	65	Liver	20	0	mmu-miR-3070b-5p
GGCUGGG	mmu-miR-3083	3.67644025347647	0.000118255607675589	0.0410965195171622	192	Liver	1	0	mmu-miR-3083
GGGCCUG	mmu-miR-3091-3p/mmu-miR-2861	1.77912598388856	0.0376095547954771	1	87	Liver	18	0	mmu-miR-3091-3p/mmu-miR-2861
UCUUGGA	mmu-miR-470	3.24549572941915	0.000586231615390207	0.165903547155428	126	Liver	53	0	mmu-miR-470
UGAAAGG	mmu-miR-488	4.38550570573986	5.78583123377386e-06	0.00251105075545786	157	Liver	32	1	mmu-miR-488
UUUGCAG	mmu-miR-450b-5p	5.7713113945686	3.93284823124583e-09	2.09620810725403e-06	230	Liver	380	0	mmu-miR-450b-5p
UUUUUGC	mmu-miR-129-5p	5.66827733375086	7.21201807866005e-09	3.80073352745385e-06	251	Liver	27	2	mmu-miR-129-5p
AGUGCAA	mmu-miR-130a/mmu-miR-721/mmu-miR-301a/mmu-miR-130b/mmu-miR-301b	10.3780003250878	1.56123418946875e-25	9.72648900039031e-23	475	Liver	45939	2	mmu-miR-130a/mmu-miR-721/mmu-miR-301a/mmu-miR-130b/mmu-miR-301b
GCUGGUG	mmu-miR-138	4.81917841713642	7.20753004423329e-07	0.000338033159074542	305	Liver	37	2	mmu-miR-138
GUGCAAA	mmu-miR-19a/mmu-miR-19b	10.4007952065884	1.22936330918628e-25	7.67122704932241e-23	639	Liver	37831	2	mmu-miR-19a/mmu-miR-19b
ACUGCAU	mmu-miR-217	5.37094981730308	3.91615024144855e-08	1.98548817241442e-05	154	Liver	106	2	mmu-miR-217
GACACCU	mmu-miR-667	2.0631605467714	0.019548688598817	1	55	Liver	8	0	mmu-miR-667
UCUGCCA	mmu-miR-3084	3.00124918805547	0.00134437218167459	0.336093045418648	139	Liver	317	0	mmu-miR-3084
UGCAUAG	mmu-miR-153	7.69472260451059	7.09007355274995e-15	4.23277391099172e-12	407	Liver	3	2	mmu-miR-153
UGCAUAU	mmu-miR-448-3p	7.01839289698594	1.12217347867926e-12	6.55349311548687e-10	360	Liver	3	1	mmu-miR-448-3p
AAUCUCU	mmu-miR-216b	3.10980629059228	0.000936050370973047	0.247117297936884	118	Liver	4	2	mmu-miR-216b
CUCAAAC	mmu-miR-290-5p/mmu-miR-292-5p	1.64070127879505	0.0504297196766711	1	156	Liver	6	1	mmu-miR-290-5p/mmu-miR-292-5p
CUCAUUU	mmu-miR-3071	1.93170369358182	0.0266980443173489	1	204	Liver	6	0	mmu-miR-3071
GCAUAUA	mmu-miR-669i/mmu-miR-669j	3.36466316673145	0.000383185776391442	0.115722104470215	200	Liver	1	0	mmu-miR-669i/mmu-miR-669j
AGCCCUU	mmu-miR-129-1-3p/mmu-miR-129-2-3p	5.83487804678474	2.69149622732955e-09	1.45340796275796e-06	230	Liver	19	2	mmu-miR-129-1-3p/mmu-miR-129-2-3p
AAGUGCC	mmu-miR-467a/mmu-miR-290-3p/mmu-miR-292-3p	5.90979719624209	1.7126458558041e-09	9.36817283124842e-07	201	Liver	84	0	mmu-miR-467a/mmu-miR-290-3p/mmu-miR-292-3p
AGCAUUG	mmu-miR-1955-3p	2.83534289276967	0.00228882620334143	0.524141200565187	97	Liver	63	0	mmu-miR-1955-3p
AUGGCUU	mmu-miR-135a/mmu-miR-135b	6.99695543576302	1.30792221577643e-12	7.61210729581883e-10	395	Liver	29	2	mmu-miR-135a/mmu-miR-135b
CAUAGAA	mmu-miR-3112	4.02270985263117	2.87661770189227e-05	0.0114489384535312	162	Liver	2	0	mmu-miR-3112
CAUGACA	mmu-miR-878-3p	3.59880969166539	0.00015983850471793	0.0537057375852246	92	Liver	4	0	mmu-miR-878-3p
CUCUGGG	mmu-miR-330/mmu-miR-326	4.29100717964985	8.89322817083485e-06	0.00377072874443397	173	Liver	244	1	mmu-miR-330/mmu-miR-326
UAAUGCU	mmu-miR-155	3.68699884016527	0.00011345719539997	0.0397100183899896	197	Liver	231	2	mmu-miR-155
UAUAAAG	mmu-miR-340-5p	7.19426213544191	3.13997212962956e-13	1.85258355648144e-10	726	Liver	31408	1	mmu-miR-340-5p
UCAUUCG	mmu-miR-1298	1.7180659233977	0.0428922957653809	1	74	Liver	4	1	mmu-miR-1298
UUCCUAG	mmu-miR-384-3p	3.6963455225927	0.000109362622453515	0.0386050057260909	124	Liver	4	1	mmu-miR-384-3p
AAGUCAC	mmu-miR-224	4.66087335352734	1.57435217440133e-06	0.00071947894370141	155	Liver	53	1	mmu-miR-224
AUCUUAG	mmu-miR-1941-3p	1.3255740298892	0.0924904165681857	1	57	Liver	0	0	mmu-miR-1941-3p
CUCACCC	mmu-miR-1982.1	3.97444683856601	3.52715079780895e-05	0.013791159619433	58	Liver	37	0	mmu-miR-1982.1
GCAUCCC	mmu-miR-324-5p	1.79306830735905	0.0364810012474579	1	60	Liver	3325	1	mmu-miR-324-5p
UAAGUGU	mmu-miR-467e/mmu-miR-467h	3.86754665216172	5.49679006841419e-05	0.0209977380613422	111	Liver	57	0	mmu-miR-467e/mmu-miR-467h
UCAUGAG	mmu-miR-3088	3.72578245903977	9.73551389821468e-05	0.035145205172555	113	Liver	3	0	mmu-miR-3088
UCAUGAU	mmu-miR-433	3.00315118036964	0.0013359983053059	0.335335574631781	164	Liver	15	1	mmu-miR-433
UUGGUAC	mmu-miR-547	5.95967260873841	1.26371886891842e-09	6.96309096774051e-07	256	Liver	142	0	mmu-miR-547
GGAAGCC	mmu-miR-671-5p	4.70147245144094	1.29146057896786e-06	0.000595363326904185	142	Liver	177	0	mmu-miR-671-5p
UGCCCUG	mmu-miR-874	3.9610617793334	3.73086111266198e-05	0.0145503583393817	111	Liver	1485	1	mmu-miR-874
AAGUGCA	mmu-miR-291b-3p	8.47951936477224	1.13063056476113e-17	6.87423383374765e-15	468	Liver	79	0	mmu-miR-291b-3p
AUCAAAG	mmu-miR-291a-5p/mmu-miR-291b-5p	6.7090924138369	9.79193093195347e-12	5.62056835494129e-09	358	Liver	1	0	mmu-miR-291a-5p/mmu-miR-291b-5p
AUGGCAC	mmu-miR-183	5.2652053773249	7.00163614947873e-08	3.49381643858989e-05	222	Liver	22325	2	mmu-miR-183
CUCACAC	mmu-miR-342-3p	3.51051886747668	0.000223616534188625	0.0726753736113032	123	Liver	6165	1	mmu-miR-342-3p
GAGGUUG	mmu-miR-672	3.90229247232307	4.76429620287443e-05	0.0183425403810665	93	Liver	8	0	mmu-miR-672
UAAGACG	mmu-miR-208b/mmu-miR-208a-3p	4.33931776257628	7.14628663696569e-06	0.00305861068062131	96	Liver	60	2	mmu-miR-208b/mmu-miR-208a-3p
UAAGACU	mmu-miR-499	5.07603055761767	1.92700669298312e-07	9.35312298279199e-05	163	Liver	77	2	mmu-miR-499
UCACAAA	mmu-miR-350	5.57744595012241	1.22037792769083e-08	6.35816900326924e-06	468	Liver	212	0	mmu-miR-350
UCUAGGA	mmu-miR-1929	2.52763403884201	0.00574169902606745	1	79	Liver	8	0	mmu-miR-1929
UUGUGAC	mmu-miR-758	3.39264374122665	0.000346108014117506	0.106947376362309	108	Liver	10	1	mmu-miR-758
UCUCUAA	mmu-miR-3108	1.76710993063774	0.0386049098629568	1	120	Liver	16	0	mmu-miR-3108
GUCUGCC	mmu-miR-346	2.21339470004316	0.0134352228714714	1	66	Liver	6	1	mmu-miR-346
GUCUUGC	mmu-miR-431	3.66319054437084	0.000124546550848552	0.0429685600427503	64	Liver	11	1	mmu-miR-431
GUUUUGU	mmu-miR-669b	3.69281106607513	0.000110894399436152	0.0389239342020894	166	Liver	2	0	mmu-miR-669b
UAUCAGA	mmu-miR-361	4.66797535325329	1.52091189441101e-06	0.000698098559534655	105	Liver	1788	1	mmu-miR-361
CAGGAAC	mmu-miR-873	4.47383566711467	3.84143983502745e-06	0.00170944072658721	138	Liver	0	1	mmu-miR-873
GAGGCUU	mmu-miR-879	3.5465817356016	0.00019513182962586	0.0643935037765339	86	Liver	58	0	mmu-miR-879
AAGGUGC	mmu-miR-18a/mmu-miR-18b	5.37087256338103	3.91782847388231e-08	1.98548817241442e-05	136	Liver	529	2	mmu-miR-18a/mmu-miR-18b
AAGUGCG	mmu-miR-467c/mmu-miR-467d	4.20812369381312	1.28749954127001e-05	0.00531737310544515	103	Liver	59	0	mmu-miR-467c/mmu-miR-467d
AGGGGGC	mmu-miR-3104-5p	1.93105008506555	0.0267384294512431	1	26	Liver	1	0	mmu-miR-3104-5p
CUCCCAA	mmu-miR-150/mmu-miR-5127	3.58948076871772	0.000165668636256527	0.0553333245096799	127	Liver	891	2	mmu-miR-150/mmu-miR-5127
CUCCCAC	mmu-miR-532-3p	3.18611860653102	0.000720977346626251	0.198456454625062	103	Liver	116	1	mmu-miR-532-3p
GCACUCU	mmu-miR-3076-3p	2.66895598776576	0.0038043709922337	0.779896053407909	58	Liver	4	0	mmu-miR-3076-3p
GUCUGGG	mmu-miR-3075	3.3402595168983	0.000418500676581153	0.125131702297765	85	Liver	9	0	mmu-miR-3075
UCUGCUG	mmu-miR-3098-3p	4.55722061800363	2.59174851103655e-06	0.00116369508145541	172	Liver	14	0	mmu-miR-3098-3p
ACAGGGG	mmu-miR-3076-5p	3.26095253273581	0.000555193133985031	0.159340429453704	62	Liver	3	0	mmu-miR-3076-5p
AGCAGCA	mmu-miR-497/mmu-miR-195/mmu-miR-15a/mmu-miR-16/mmu-miR-322/mmu-miR-1907/mmu-miR-15b	7.68494092288019	7.65338054005983e-15	4.56141480187566e-12	684	Liver	176221	2	mmu-miR-497/mmu-miR-195/mmu-miR-15a/mmu-miR-16/mmu-miR-322/mmu-miR-1907/mmu-miR-15b
AGGUAGA	mmu-miR-1839-5p	5.79777278183472	3.36007083893444e-09	1.79763789882993e-06	190	Liver	2990	0	mmu-miR-1839-5p
GCAGCAU	mmu-miR-103/mmu-miR-107	6.0644546196199	6.62010774899455e-10	3.66753969294298e-07	307	Liver	76103	2	mmu-miR-103/mmu-miR-107
GCUGCAG	mmu-miR-666-3p	3.70945046519214	0.000103854794281911	0.0370761615586421	184	Liver	37	0	mmu-miR-666-3p
AACUCAC	mmu-miR-3087	2.93337205021756	0.00167650912728026	0.400685681419982	77	Liver	1	0	mmu-miR-3087
ACAGGUG	mmu-miR-3097-5p	2.71414539367348	0.00332234980652326	0.707660508789455	98	Liver	3	0	mmu-miR-3097-5p
AGCUGCC	mmu-miR-22	6.8180768662536	4.61336374423076e-12	2.67113760790961e-09	234	Liver	368033	2	mmu-miR-22
AGGAGCU	mmu-miR-28/mmu-miR-708	4.05860664016607	2.46831944383616e-05	0.00989796096978302	87	Liver	8281	1	mmu-miR-28/mmu-miR-708
AGGUGGA	mmu-miR-363-5p	0.675242898212291	0.249760728006418	1	50	Liver	14	0	mmu-miR-363-5p
AUGCAAG	mmu-miR-300	3.08806340870294	0.00100732739552373	0.262912450231695	179	Liver	117	0	mmu-miR-300
AUUUAGC	mmu-miR-344b	2.48355010793993	0.00650400160792704	1	141	Liver	2	0	mmu-miR-344b
CUGCUUA	mmu-miR-3105-3p	3.37196364705255	0.000373171494533448	0.11343956042287	104	Liver	412	0	mmu-miR-3105-3p
GACUGGC	mmu-miR-871-3p	1.19296079456732	0.116442363884114	1	64	Liver	30	0	mmu-miR-871-3p
GAGUGUG	mmu-miR-574-5p	2.10584744237811	0.0176088031365103	1	67	Liver	304	0	mmu-miR-574-5p
GAGUUCA	mmu-miR-3089-5p	1.66469940040915	0.0479863713408318	1	84	Liver	0	0	mmu-miR-3089-5p
GAUAUGU	mmu-miR-190/mmu-miR-190b	3.3610595551158	0.000388220409354749	0.116466122806425	66	Liver	522	2	mmu-miR-190/mmu-miR-190b
GGACGGA	mmu-miR-184	4.28513457479935	9.1314302481961e-06	0.00384433213449056	13	Liver	154	2	mmu-miR-184
GGAGUGU	mmu-miR-122	4.59089180373089	2.2067805021207e-06	0.000995258006456436	91	Liver	833111	2	mmu-miR-122
UCACACA	mmu-miR-377	4.96004865780778	3.52377622585147e-07	0.000168084125973115	250	Liver	10	1	mmu-miR-377
UCAGACC	mmu-miR-3097-3p	2.82568821147258	0.00235895810226055	0.533124531110883	72	Liver	25	0	mmu-miR-3097-3p
UGAGGAC	mmu-miR-1224	2.51867800736683	0.00588981620871359	1	52	Liver	6	1	mmu-miR-1224
UGGAGUU	mmu-miR-3068	4.38247786428999	5.86685455031202e-06	0.00254034802028511	74	Liver	717	0	mmu-miR-3068
UGGCCCU	mmu-miR-328	0.981064338133905	0.163280507575942	1	79	Liver	1510	1	mmu-miR-328
CUUGUUA	mmu-miR-544-5p	3.70590874062889	0.00010531706887286	0.0374928765187382	98	Liver	2	1	mmu-miR-544-5p
GUCAGGC	mmu-miR-344g-5p	3.49711318082739	0.000235161122839307	0.0759570426770961	64	Liver	39	0	mmu-miR-344g-5p
AAAGCCA	mmu-miR-742	6.07144595746211	6.33818110012423e-10	3.51769051056895e-07	310	Liver	2	0	mmu-miR-742
AACCUGG	mmu-miR-490-3p	4.39547344756288	5.52657876127982e-06	0.002409588339918	89	Liver	76	2	mmu-miR-490-3p
ACAGAAC	mmu-miR-1912	6.11196513571428	4.92058434336814e-10	2.74568606359942e-07	378	Liver	3	0	mmu-miR-1912
UGACCUA	mmu-miR-192/mmu-miR-215	3.37197475175375	0.000373156448759441	0.11343956042287	63	Liver	10940388	2	mmu-miR-192/mmu-miR-215
CAUAACA	mmu-miR-669a-3-3p/mmu-miR-669a-3p	2.30114578365411	0.0106916961009596	1	100	Liver	23	0	mmu-miR-669a-3-3p/mmu-miR-669a-3p
CCCACAG	mmu-miR-3057-3p	5.07627693694132	1.92451090180905e-07	9.35312298279199e-05	160	Liver	2	0	mmu-miR-3057-3p
GGAAGAC	mmu-miR-7a/mmu-miR-7b	6.93511285856617	2.02948494152069e-12	1.17913075102352e-09	236	Liver	6050	2	mmu-miR-7a/mmu-miR-7b
GGCUCUG	mmu-miR-760-3p	5.14406166121461	1.34430611556855e-07	6.62742914975296e-05	176	Liver	9	1	mmu-miR-760-3p
GUCCCAG	mmu-miR-1955-5p	2.02568286855455	0.0213986466800484	1	103	Liver	14	0	mmu-miR-1955-5p
AUAAUAC	mmu-miR-369-3p	5.80303919588413	3.25617800803492e-09	1.74531141230672e-06	335	Liver	48	1	mmu-miR-369-3p
AUGUGUU	mmu-miR-1198-5p	4.54761388689769	2.71287804008464e-06	0.00121536936195792	73	Liver	489	0	mmu-miR-1198-5p
GGCAAGA	mmu-miR-31	6.16900381998109	3.4360784044486e-10	1.92763998489567e-07	188	Liver	10009	2	mmu-miR-31
GGGAGAU	mmu-miR-1941-5p	2.22362179039399	0.0130869506093774	1	62	Liver	4	0	mmu-miR-1941-5p
GUGUGCA	mmu-miR-466j/mmu-miR-466h-5p/mmu-miR-466m-5p	4.83283396526978	6.73015219342204e-07	0.00031766318352952	131	Liver	82	0	mmu-miR-466j/mmu-miR-466h-5p/mmu-miR-466m-5p
UCAACAG	mmu-miR-421	4.705015410341	1.26923389472455e-06	0.000587655293257465	188	Liver	889	1	mmu-miR-421
UGUGUGC	mmu-miR-466n-5p	4.17186742594764	1.51056703410777e-05	0.00616891684871006	81	Liver	2	0	mmu-miR-466n-5p
AACAGUC	mmu-miR-132/mmu-miR-212-3p	5.0861013964487	1.82749349662022e-07	8.89989332854047e-05	205	Liver	395	2	mmu-miR-132/mmu-miR-212-3p
ACUCAGU	mmu-miR-201	2.67317285912935	0.00375687609949666	0.773916476496312	65	Liver	50	0	mmu-miR-201
AUGCACC	mmu-miR-500/mmu-miR-501-3p	3.38785388179263	0.000352208902155396	0.108480341863862	105	Liver	2102	1	mmu-miR-500/mmu-miR-501-3p
CAGUCCA	mmu-miR-455	4.59712244514847	2.14182950474965e-06	0.000970248765651591	154	Liver	1325	2	mmu-miR-455
GGUCCUC	mmu-miR-1264-5p	2.34469707867166	0.00952127187466978	1	101	Liver	0	0	mmu-miR-1264-5p
AGGACAC	mmu-miR-1197	4.39806561259112	5.46099819203506e-06	0.00238645620991932	88	Liver	3	1	mmu-miR-1197
CAGCAGG	mmu-miR-214/mmu-miR-761	5.89775935084697	1.8423541739645e-09	1.00408302481065e-06	318	Liver	844	0	mmu-miR-214/mmu-miR-761
CCAGCAU	mmu-miR-338-3p	3.74289290470434	9.09568869912775e-05	0.0329263930908424	132	Liver	964	2	mmu-miR-338-3p
GAUCUAG	mmu-miR-344/mmu-miR-344c	1.58256156821655	0.0567607144578892	1	29	Liver	158	0	mmu-miR-344/mmu-miR-344c
GCAAGGU	mmu-miR-679-3p	3.71136528839188	0.000103072183126772	0.0368998415593844	87	Liver	5	0	mmu-miR-679-3p
GGACGAG	mmu-miR-1947	-0.0912428379622226	0.463649818560737	1	5	Liver	59	0	mmu-miR-1947
UUCCUGC	mmu-miR-3074-5p	4.3017958465829	8.47096871892898e-06	0.00360016170554482	193	Liver	7	0	mmu-miR-3074-5p
UCCUGGC	mmu-miR-3113	2.06917773712688	0.0192647055219393	1	127	Liver	10	0	mmu-miR-3113
UUGGAGC	mmu-miR-3057-5p	4.17265248524372	1.50536986145588e-05	0.00616891684871006	77	Liver	221	0	mmu-miR-3057-5p
AACUGCA	mmu-miR-883a-3p/mmu-miR-883b-3p	4.75262325708897	1.00397142635698e-06	0.000467850684682353	180	Liver	1	0	mmu-miR-883a-3p/mmu-miR-883b-3p
ACUCCAU	mmu-miR-880	0.667320435297208	0.252283737982206	1	70	Liver	4	0	mmu-miR-880
ACAGAGU	mmu-miR-3082-5p	3.44773026293031	0.000282659151345184	0.0893202918250783	138	Liver	12	0	mmu-miR-3082-5p
AGCUUUU	mmu-miR-208a-5p	4.92127274391919	4.29916022490196e-07	0.000204210110682843	223	Liver	34	0	mmu-miR-208a-5p
AGGUUAC	mmu-miR-872	3.4544786230614	0.000275678962013026	0.0876659099201424	56	Liver	477	0	mmu-miR-872
CCUUCAU	mmu-miR-205	5.11321535898357	1.58360430158931e-07	7.72798899175583e-05	226	Liver	67	2	mmu-miR-205
GGUGCUA	mmu-miR-3070a/mmu-miR-3070b-3p	1.74481077934684	0.040508905920104	1	68	Liver	3	0	mmu-miR-3070a/mmu-miR-3070b-3p
CAUAGCA	mmu-miR-3060	3.7877080963673	7.60216640859426e-05	0.0282800590399706	109	Liver	8	0	mmu-miR-3060
GAAUUGU	mmu-miR-219-3p	1.58324652808198	0.0566826426412411	1	63	Liver	7	1	mmu-miR-219-3p
GAGUAUU	mmu-miR-496	1.85785898759587	0.0315945208957241	1	60	Liver	9	1	mmu-miR-496
UAGUUGU	mmu-miR-669c	3.33756175505539	0.000422584690007609	0.125930237622268	65	Liver	16	0	mmu-miR-669c
UUAGGCA	mmu-miR-1948	4.82341271660405	7.05612689164262e-07	0.000331637963907203	134	Liver	1641	0	mmu-miR-1948
UACCUUU	mmu-miR-3061-3p	4.42075749867041	4.91777516727149e-06	0.00216382107359946	137	Liver	32	0	mmu-miR-3061-3p
UGUGUGU	mmu-miR-466l-5p	4.83154653215166	6.77382727686396e-07	0.000319047264740292	144	Liver	0	0	mmu-miR-466l-5p
AGGGCCA	mmu-miR-3109	1.57016178163859	0.0581887391792331	1	58	Liver	2	0	mmu-miR-3109
CCUCCAU	mmu-miR-1930	2.15709511883758	0.0154991269323833	1	81	Liver	11	0	mmu-miR-1930
UCAUAGA	mmu-miR-376b	3.02810056687627	0.00123048087169015	0.316233584024368	96	Liver	21	1	mmu-miR-376b
AUCACUA	mmu-miR-34b-3p	1.76972820748571	0.0383862142733016	1	65	Liver	13	0	mmu-miR-34b-3p
CCUGCUG	mmu-miR-370	3.88299501445711	5.1588842213533e-05	0.0197585265677832	155	Liver	14	1	mmu-miR-370
AUAUCAG	mmu-miR-3074-1-3p	2.86077476040034	0.00211303589443774	0.492337363403994	81	Liver	8	0	mmu-miR-3074-1-3p
AUGACAC	mmu-miR-425/mmu-miR-489	3.98553636934127	3.36639315943029e-05	0.013229925116561	98	Liver	4060	2	mmu-miR-425/mmu-miR-489
AUGUGGG	mmu-miR-299	1.94526134186153	0.0258717661616289	1	53	Liver	42	1	mmu-miR-299
GGACACU	mmu-miR-3095-3p	4.00820383444101	3.05911517157724e-05	0.0121123815570314	63	Liver	2	0	mmu-miR-3095-3p
GGAGCCA	mmu-miR-505-5p	2.53366244387776	0.00564387040931165	1	93	Liver	16	0	mmu-miR-505-5p
GUUGGGG	mmu-miR-3094	0.847914598967815	0.198242766768438	1	32	Liver	1	0	mmu-miR-3094
AGGUUAU	mmu-miR-154	3.51719500658077	0.000218066620512508	0.0710897182870778	67	Liver	37	1	mmu-miR-154
CCUAACA	mmu-miR-3098-5p	3.53963593201676	0.000200339681917942	0.065911755351003	66	Liver	11	0	mmu-miR-3098-5p
GGGAAAG	mmu-miR-1953	3.31910675438003	0.000451529493025408	0.131846611963419	155	Liver	29	0	mmu-miR-1953
GUAACAG	mmu-miR-194	5.77686388995659	3.80529009349249e-09	2.03202490992499e-06	204	Liver	96884	2	mmu-miR-194
AGUAGAC	mmu-miR-411	3.01134514980676	0.00130046512438482	0.330318141593744	35	Liver	268	1	mmu-miR-411
UUCCUCU	mmu-miR-3059	3.33311410569781	0.000429398566940388	0.127531374381295	175	Liver	1	0	mmu-miR-3059
ACUGGCC	mmu-miR-193/mmu-miR-193b	3.09065607457592	0.000998574067504403	0.261626405686154	109	Liver	3563	2	mmu-miR-193/mmu-miR-193b
AGUCAUG	mmu-miR-707	2.83460244585698	0.00229413720550939	0.524141200565187	79	Liver	3	0	mmu-miR-707
GAGGGGC	mmu-miR-423-5p	5.87060725756254	2.17100881404735e-09	1.17679300866353e-06	68	Liver	2592	1	mmu-miR-423-5p
UUGGGAA	mmu-miR-450b-3p	5.33014851849249	4.90662408272312e-08	2.47784516177517e-05	126	Liver	22	0	mmu-miR-450b-3p
AGUGCUU	mmu-miR-302c	7.3956719713311	7.03474700735972e-14	4.17160497536431e-11	286	Liver	14	2	mmu-miR-302c
UGUGCGG	mmu-miR-147	1.39267716540325	0.0818587183602724	1	10	Liver	15	2	mmu-miR-147
UGUGCGU	mmu-miR-210	1.69451864072354	0.0450833862923647	1	12	Liver	1376	2	mmu-miR-210
CUCCAUU	mmu-miR-136	3.24151788690074	0.000594474863107856	0.167641911396415	108	Liver	209	1	mmu-miR-136
GUCUUGU	mmu-miR-669e	3.66242101043165	0.000124921402004035	0.0429729622893881	62	Liver	2	0	mmu-miR-669e
GAGAAUG	mmu-miR-3062	5.39770803578902	3.37487940635773e-08	1.72118849724244e-05	120	Liver	5	0	mmu-miR-3062
AUGUGUA	mmu-miR-511-3p	4.71632523786689	1.20071225877967e-06	0.000557130488073766	95	Liver	634	0	mmu-miR-511-3p
GAUGUGU	mmu-miR-466b-5p/mmu-miR-466c-5p	2.74710847396262	0.00300616229062741	0.64933105477552	51	Liver	16	0	mmu-miR-466b-5p/mmu-miR-466c-5p
AUGUAGU	mmu-miR-380-3p	3.13541725667058	0.00085804915927478	0.229099125526366	69	Liver	6	0	mmu-miR-380-3p
GUACCAU	mmu-miR-3101	3.9048583858126	4.71402889997779e-05	0.0181961515539143	119	Liver	1	0	mmu-miR-3101
CAAGUGC	mmu-miR-105	6.70647270250032	9.96925622754278e-12	5.70967398553909e-09	165	Liver	6	0	mmu-miR-105
GAAACAU	mmu-miR-494	6.77051407381825	6.4162799894389e-12	3.70860983389569e-09	227	Liver	26	1	mmu-miR-494
GACCCUG	mmu-miR-504	3.50954117992238	0.000224440271727071	0.0727186480395708	84	Liver	4	0	mmu-miR-504
GUUGUGU	mmu-miR-669a-5p/mmu-miR-669f-5p/mmu-miR-669l	1.84332521005616	0.0326407712428206	1	57	Liver	34	0	mmu-miR-669a-5p/mmu-miR-669f-5p/mmu-miR-669l
UGUGUCA	mmu-miR-599	3.88752063088725	5.06366911764893e-05	0.0194444894117719	77	Liver	4	0	mmu-miR-599
AUACCUC	mmu-miR-875-5p	3.21218110328895	0.000658656526614547	0.183765170925459	52	Liver	3	1	mmu-miR-875-5p
AAAGCCU	mmu-miR-3078	3.85207447998285	5.85606927388426e-05	0.0221945025480214	158	Liver	6	0	mmu-miR-3078
GUCACUC	mmu-miR-668	3.14657072593034	0.00082598651358603	0.221364385641056	75	Liver	6	1	mmu-miR-668
UCUAGCC	mmu-miR-344f-3p	3.04493582268941	0.00116364982821988	0.301385305508949	46	Liver	18	0	mmu-miR-344f-3p
UUGAACC	mmu-miR-434-3p	1.10709269913184	0.134126925878773	1	81	Liver	96	0	mmu-miR-434-3p
GAAGCGC	mmu-miR-3080-5p	1.59333081262368	0.0555429989130294	1	12	Liver	24	0	mmu-miR-3080-5p
UAUAAUA	mmu-miR-374	6.32393115077005	1.27495686791364e-10	7.19075673503291e-08	333	Liver	896	1	mmu-miR-374
AGGCUAG	mmu-miR-3099	3.27555548573158	0.000527271985842074	0.152381603908359	43	Liver	8	0	mmu-miR-3099
AUCCUUU	mmu-miR-501-5p	3.08116636139082	0.0010309570512624	0.268048833328224	104	Liver	33	0	mmu-miR-501-5p
GAUAGAC	mmu-miR-463	1.30147029190654	0.0965487634663513	1	26	Liver	1	0	mmu-miR-463
GUCAGUC	mmu-miR-344f-5p	6.15544103235458	3.74344248747644e-10	2.09258435049933e-07	118	Liver	6	0	mmu-miR-344f-5p
GUCAGUU	mmu-miR-223	5.400461427572	3.32348513776657e-08	1.69830090539872e-05	155	Liver	869	2	mmu-miR-223
UUGUUCG	mmu-miR-375	3.70187122346725	0.000107007620402009	0.0379877052427131	112	Liver	217	2	mmu-miR-375
CAGUAAC	mmu-miR-802	4.62987082660162	1.82946956813908e-06	0.000832408653503281	149	Liver	11013	2	mmu-miR-802
UGGGAAC	mmu-miR-3100-5p	1.55191463104029	0.0603413257933482	1	65	Liver	1	0	mmu-miR-3100-5p
CCAGGAG	mmu-miR-665	4.19447576108212	1.36751697386425e-05	0.0056341699323207	138	Liver	66	1	mmu-miR-665
UUGAUCU	mmu-miR-3079-5p	4.2355599523533	1.1399143194491e-05	0.00475344271210275	90	Liver	9	0	mmu-miR-3079-5p
UCCUAUG	mmu-miR-202-5p	3.78967102738223	7.54234619943982e-05	0.0281329513239105	111	Liver	4	2	mmu-miR-202-5p
AAUGUUG	mmu-miR-409-3p	2.95180988497744	0.00157958686706804	0.382260021830466	123	Liver	73	1	mmu-miR-409-3p
AUCUAGU	mmu-miR-878-5p	3.24655190534554	0.000584060726640238	0.165873246365828	54	Liver	5	0	mmu-miR-878-5p
AGCUUAU	mmu-miR-21/mmu-miR-590-5p	6.76996303680485	6.44076509031198e-12	3.71632145711001e-09	158	Liver	2464896	2	mmu-miR-21/mmu-miR-590-5p
ACUCCAG	mmu-miR-509-5p	2.99774736707278	0.0013599151600811	0.337258959700114	89	Liver	0	0	mmu-miR-509-5p
CCCUCAG	mmu-miR-760-5p	4.17645876918783	1.48041189979216e-05	0.00608449290814579	73	Liver	19	0	mmu-miR-760-5p
UGGUUGC	mmu-miR-3066	2.20003740536298	0.0139021206280734	1	65	Liver	81	0	mmu-miR-3066
GAGAUGA	mmu-miR-143	2.95527042322177	0.00156197549176142	0.379560044498026	173	Liver	514268	2	mmu-miR-143
AUGUGUG	mmu-miR-1187/mmu-miR-466a-5p	3.74942990670958	8.86185126430454e-05	0.0323457571147116	87	Liver	0	0	mmu-miR-1187/mmu-miR-466a-5p
GGUAGAC	mmu-miR-379/mmu-miR-1193-5p	4.59664476472768	2.14674351043786e-06	0.000970328066717911	48	Liver	241	1	mmu-miR-379/mmu-miR-1193-5p
AGCUUUC	mmu-miR-3095-5p	5.56004633289357	1.34851520406303e-08	6.99879390908711e-06	149	Liver	3	0	mmu-miR-3095-5p
CCCAGGU	mmu-miR-3090	2.07786074782171	0.018861093365045	1	82	Liver	7	0	mmu-miR-3090
ACCCGUA	mmu-miR-99a/mmu-miR-100/mmu-miR-99b	2.04891679971369	0.0202351256473152	1	28	Liver	166510	2	mmu-miR-99a/mmu-miR-100/mmu-miR-99b
AACACUG	mmu-miR-141/mmu-miR-200a	7.35985453852714	9.2055370627042e-14	5.44967794112089e-11	404	Liver	8256	2	mmu-miR-141/mmu-miR-200a
GCAGAGG	mmu-miR-298	3.38522459693049	0.000355600182880465	0.109169256144303	173	Liver	6	0	mmu-miR-298
GGAUUUC	mmu-miR-876-5p	3.52059186657658	0.000215292404515909	0.0704006162767022	93	Liver	0	1	mmu-miR-876-5p
AGGGAUU	mmu-miR-541	1.90307876777417	0.0285151339892264	1	55	Liver	1123	0	mmu-miR-541
AGUGGGC	mmu-miR-3061-5p	1.44408278960314	0.0743578443088705	1	31	Liver	32	0	mmu-miR-3061-5p
UGACUCC	mmu-miR-3077	2.19985478330107	0.0139085998397298	1	41	Liver	0	0	mmu-miR-3077
AAUGGGG	mmu-miR-3092	1.27338156206366	0.101441338431762	1	45	Liver	3	0	mmu-miR-3092
AGGCUCA	mmu-miR-3079-3p	4.3174280144377	7.89289333811324e-06	0.00336237256203624	137	Liver	2	0	mmu-miR-3079-3p
AACGGAA	mmu-miR-191	2.6028185383909	0.00462304388869196	0.933854865515776	29	Liver	130181	2	mmu-miR-191
GUGACUG	mmu-miR-134	2.36917428514598	0.00891392512114701	1	63	Liver	35	1	mmu-miR-134
CAGGACC	mmu-miR-1933-3p	2.2043269384113	0.013750679884254	1	57	Liver	25	0	mmu-miR-1933-3p
AGCUAGC	mmu-miR-1198-3p	2.18445158539224	0.0144645405865487	1	39	Liver	22	0	mmu-miR-1198-3p
AUCAGGG	mmu-miR-465a-3p	1.80053304279959	0.0358882554842794	1	28	Liver	14	0	mmu-miR-465a-3p
UGUAUGU	mmu-miR-297b-5p/mmu-miR-297a/mmu-miR-297c	3.16709965041248	0.000769837741550716	0.208390529195658	72	Liver	12	0	mmu-miR-297b-5p/mmu-miR-297a/mmu-miR-297c
AACCUCU	mmu-miR-3103	4.37470159833738	6.07993505724895e-06	0.0026204520096743	54	Liver	1	0	mmu-miR-3103
UAGACUG	mmu-miR-151-3p	1.9692920849031	0.024459779793946	1	51	Liver	123597	1	mmu-miR-151-3p
GAGGAAU	mmu-miR-3063	2.80803171138519	0.00249226590936932	0.555775297789359	107	Liver	4	0	mmu-miR-3063
GGGUACA	mmu-miR-1b-3p	0.66356621726876	0.25348399263481	1	45	Liver	2	0	mmu-miR-1b-3p
GCGGGGC	mmu-miR-744	-0.590110326616106	0.2775583430192	1	10	Liver	1813	1	mmu-miR-744
GUGGACA	mmu-miR-3093-3p	0.552137178441367	0.290427185725431	1	55	Liver	2	0	mmu-miR-3093-3p
UGCAUGG	mmu-miR-669h-5p	4.81697338705054	7.28760595521856e-07	0.000341059958704228	93	Liver	0	0	mmu-miR-669h-5p
AUCCUUG	mmu-miR-362-5p	2.97383975169329	0.00147049310831113	0.360270811536226	66	Liver	473	1	mmu-miR-362-5p
UGCGCUC	mmu-miR-3081	0.807938505483361	0.209562991738036	1	6	Liver	10	0	mmu-miR-3081
AUCCCUU	mmu-miR-188-5p	3.48826823060099	0.000243080050243794	0.0782717761785018	93	Liver	83	1	mmu-miR-188-5p
UGUGACA	mmu-miR-3100-3p	3.71541732563981	0.000101434294852409	0.0364502569422658	112	Liver	4	0	mmu-miR-3100-3p
GGGCCCC	mmu-miR-296-5p	1.66419096531172	0.0480371364948399	1	63	Liver	19	1	mmu-miR-296-5p
AGGGUUG	mmu-miR-296-3p	2.07180781106293	0.0191416839787753	1	21	Liver	5	1	mmu-miR-296-3p
GAAGGUC	mmu-miR-493	2.37233041289431	0.00883813778621296	1	56	Liver	7	1	mmu-miR-493
CCAAUGA	mmu-miR-3086-3p	3.21028838728703	0.000663009315125147	0.184316589604791	72	Liver	44	0	mmu-miR-3086-3p
GAGAGAU	mmu-miR-741	0.922859466665529	0.178040223054125	1	55	Liver	21	0	mmu-miR-741
CUCUAGC	mmu-miR-1251	3.15904109222357	0.00079144585097604	0.212898933912555	59	Liver	2	1	mmu-miR-1251
AUGGGUC	mmu-miR-3091-5p	0.573000371736827	0.283322221140042	1	22	Liver	15	0	mmu-miR-3091-5p
AACCGUU	mmu-miR-451	1.05300724868869	0.146168834949846	1	9	Liver	27284	2	mmu-miR-451
CGUACCG	mmu-miR-126-3p	1.12544964182664	0.130199272629597	1	18	Liver	66061	2	mmu-miR-126-3p
GCGGGCA	mmu-miR-666-5p	0.397241105055366	0.345594836552061	1	7	Liver	4	0	mmu-miR-666-5p
GGUGCGG	mmu-miR-675-5p	-0.613309692142983	0.269835792996904	1	4	Liver	7	0	mmu-miR-675-5p
AUGCCUU	mmu-miR-532-5p	3.59479129214865	0.000162325863906949	0.054379164408828	92	Liver	15424	1	mmu-miR-532-5p
GAUCGAC	mmu-miR-369-5p	0.61202459913751	0.270260741197545	1	3	Liver	7	0	mmu-miR-369-5p
GGUCGAC	mmu-miR-412-5p	0.967654675773463	0.166608430563252	1	2	Liver	6	1	mmu-miR-412-5p
UUUGCGA	mmu-miR-450a	-0.0692985094781906	0.472376006075727	1	5	Liver	445	1	mmu-miR-450a
CGCCCUU	mmu-miR-1249	-0.0203338884128366	0.49188851116319	1	5	Liver	355	1	mmu-miR-1249
AUCGUAC	mmu-miR-487b	0.571785559746601	0.283733630683754	1	9	Liver	2	1	mmu-miR-487b
CGCUCUG	mmu-miR-3104-3p	1.88222997255085	0.0299023988911893	1	9	Liver	1	0	mmu-miR-3104-3p
CGACUUC	mmu-miR-1964-3p	-0.21641347488432	0.414332731848049	1	4	Liver	64	0	mmu-miR-1964-3p
ACGUCAU	mmu-miR-598	1.21559763118845	0.11206911848611	1	8	Liver	284	0	mmu-miR-598
CGGAUCC	mmu-miR-127	0.618957139400033	0.267972297395565	1	8	Liver	2937	1	mmu-miR-127
CUCGACU	mmu-miR-434-5p	-0.530593236755434	0.29785034170005	1	1	Liver	81	0	mmu-miR-434-5p
CGUCCUG	mmu-miR-676	0.269179009723892	0.393895966075328	1	6	Liver	1043	0	mmu-miR-676
UCGUAGA	mmu-miR-376a	0.232352068508254	0.408132286989832	1	1	Liver	12	0	mmu-miR-376a
CGUGUGU	mmu-miR-466f	0.569053278021329	0.28465999208083	1	5	Liver	0	0	mmu-miR-466f
GUGCCGC	mmu-miR-293	0.112253198685667	0.455311324611529	1	3	Liver	5	0	mmu-miR-293
CAUCCGG	mmu-miR-5103	0.442380600957936	0.329106907177494	1	1	Liver	69	0	mmu-miR-5103
ACGCUCA	mmu-miR-574-3p	-0.284397377126854	0.388052934401988	1	5	Liver	1376	0	mmu-miR-574-3p
CCCGUCC	mmu-miR-1247	0.702171804349843	0.241286013530285	1	4	Liver	146	0	mmu-miR-1247
CGAGGAG	mmu-miR-151-5p	1.62372995174105	0.0522167278438568	1	4	Liver	21517	1	mmu-miR-151-5p
CCGAGCC	mmu-miR-615-3p	-0.174105595992267	0.430891237702088	1	3	Liver	1	1	mmu-miR-615-3p
ACGUAGU	mmu-miR-471-5p	2.77701362989905	0.00274304391805117	0.606212705889308	3	Liver	1	0	mmu-miR-471-5p
CCUCGGG	mmu-miR-3080-3p	1.93714865252037	0.0263635874118283	1	4	Liver	1	0	mmu-miR-3080-3p
CGUGUCU	mmu-miR-187	1.53135302918263	0.0628410830563574	1	5	Liver	204	2	mmu-miR-187
GAGCGCC	mmu-miR-339-3p	1.08872888034307	0.138136731073821	1	5	Liver	144	0	mmu-miR-339-3p
GCUCGGU	mmu-miR-423-3p	0.621175555026318	0.267242060685951	1	4	Liver	2315	1	mmu-miR-423-3p
CGACCCA	mmu-miR-551b	-0.372433013140882	0.354785238998234	1	3	Liver	33	2	mmu-miR-551b
AUGGCGC	mmu-miR-652	1.20495687086335	0.114109976037284	1	2	Liver	1473	1	mmu-miR-652
CCGGUUC	mmu-miR-671-3p	0.773907788886893	0.219492661609415	1	4	Liver	290	0	mmu-miR-671-3p
AGACGGG	mmu-miR-483	1.14717089214226	0.125655499565641	1	2	Liver	8	0	mmu-miR-483
UAGCCGC	mmu-miR-701	NA	NA	NA	0	Liver	17	0	mmu-miR-701
ACGCGGG	mmu-miR-700	-0.337290385817406	0.367949003264642	1	1	Liver	18	0	mmu-miR-700
