# Supplementary material for: Inducible and reversible inhibition of miRNA-mediated gene repression in vivo
Source: eLife. 2021 Aug 31;10:e70948. doi: 10.7554/eLife.70948 (PMC8476124; doi:10.7554/eLife.70948)
Supplement: Figure 6—source data 1. [file elife-70948-fig6-data1.csv]

baseMean	log2FoldChange	lfcSE	stat	pvalue	padj	Symbol	Tissue
772.168154932033	0.539437395158959	0.168955043876547	3.19278657080588	0.00140907051563344	0.00988958750787175	Gnai3	heart
54.8692958091039	-0.401708306258585	0.302982775744143	-1.32584535629779	0.184890925928904	0.374058688222711	Cdc45	heart
869.14988676036	-0.0468023538493808	0.477441391502307	-0.0980274326490912	0.921910510165506	0.965732695217933	H19	heart
20.8478768548879	-0.404562967406485	0.463720399039518	-0.872428662281057	0.382974569820918	0.594233676594426	Scml2	heart
19.1789749536122	-0.954503005270383	0.755744021263634	-1.26299775904865	0.206589985069704	0.401354657025637	Apoh	heart
2233.59647380307	0.700796848449756	0.100524525019817	6.97140173814899	3.13798461653049e-12	1.85344857610138e-10	Narf	heart
1854.71313599902	0.30944349597278	0.210521814493206	1.46988803377793	0.141592080976514	0.312571013841655	Cav2	heart
1421.99949009203	0.0564169996783427	0.113256848726809	0.498133228255612	0.618390141532361	0.782827527469618	Klf6	heart
760.264502024695	0.146631180092667	0.149981471531335	0.977661964478273	0.328241539503262	0.540623800698034	Scmh1	heart
4504.13457567352	-0.418802714243051	0.15123168388556	-2.76927892014988	0.00561805174016652	0.0295956362713637	Cox5a	heart
81.7964554896582	-0.120222419755639	0.242917595669829	-0.494910298383837	0.620663440882474	0.784322681059597	Tbx2	heart
17.2580156566802	-0.0853695671064499	0.501722496507701	-0.170152958459457	0.864889845864942	0.931552917267461	Ngfr	heart
92.3161151125347	-0.000980612321245214	0.285738036867835	-0.00343185783731966	0.997261778991701	0.998871072903632	Wnt9a	heart
376.809003407389	0.150455938913669	0.164642682469563	0.913833136443723	0.360804531796829	0.573353951995799	Fer	heart
604.451847543488	-0.149206232001672	0.166910180399162	-0.893931284747573	0.371358657857958	0.583197229260356	Xpo6	heart
390.115927569064	0.189680369960935	0.141331141393308	1.34209890397104	0.179563929228409	0.367036741631823	Tfe3	heart
59.6689363086017	-0.161697977559275	0.320662364197445	-0.504262413096008	0.614076986726293	0.77902988441595	Axin2	heart
144.082316577661	-0.260901319129069	0.223961632623703	-1.16493756574561	0.244044266089918	0.447245126464854	Brat1	heart
1556.58501078594	-0.24647790677157	0.180764337312924	-1.36353171447136	0.172714996366264	0.357536551421834	Gna12	heart
16.6467833979899	0.828046592304556	0.505497709873324	1.63808178777321	0.101404633597007	0.248619015417352	Slc22a18	heart
5567.71210629656	-0.0287622680859588	0.125349963581638	-0.229455735479544	0.818514720815583	0.904789342202691	Dlat	heart
9176.78268825546	-0.30600322579458	0.118838612213572	-2.57494782288978	0.0100255209265504	0.0459637794092252	Sdhd	heart
2130.45528579729	-0.0422562299827397	0.121703811702106	-0.347205476901333	0.728436956520923	0.852749363772756	Ccnd2	heart
693.442704016872	-0.0681667114048715	0.132052648019866	-0.516208591247761	0.605708730533958	0.773746851660805	Gpr107	heart
18.9038532335514	0.135663209828711	0.548701724060232	0.247244001394497	0.804719393921904	0.896314088336347	Nalcn	heart
22.9196842822953	1.37607449832974	0.544643433332306	2.52656034042395	0.0115185599565723	0.0506638401184631	Slfn4	heart
17.6953348535349	0.140984280362749	0.683160532541056	0.206370645912974	0.836501398466891	0.914228218574356	Drp2	heart
22.5530664175656	0.0950899990029528	0.449338395842202	0.211622242574495	0.832401755257063	0.91182288388046	Tspan32	heart
2024.3394099356	0.0658642786021965	0.195893425301465	0.336225059625336	0.736701156964914	0.857653471650412	Gmpr	heart
475.810698112123	0.0711217885769646	0.138058174010705	0.515158114226906	0.60644253573449	0.774239913685916	Mid2	heart
807.415816151425	0.154841254990739	0.136664447282201	1.13300319190553	0.257212912897316	0.462465891675252	Trim25	heart
375.709767953874	-0.61046760019731	0.248450355619084	-2.45710093139596	0.0140063329176662	0.0590186554442984	Dgke	heart
390.467658706346	0.153396441741047	0.146701024481088	1.04563988072777	0.295727329209861	0.50411090451516	Scpep1	heart
208.972509591936	0.327509200087694	0.284339233124397	1.15182557288677	0.249392757078336	0.453753218309732	Mnt	heart
219.449661696556	0.598744334508186	0.222002709837498	2.69701363080863	0.00699644063895861	0.0351600132883798	Itgb2	heart
71.1391954000488	-0.407857238853166	0.275725929276629	-1.47921249163321	0.139083532002784	0.30886323415462	Hddc2	heart
150.935707473497	-0.0178925948790682	0.234366139274882	-0.0763446244172778	0.939144924262826	0.97274107955548	Tpd52l1	heart
24.1464625169166	-0.578805714738344	0.429835085120541	-1.34657624464515	0.178116749228107	0.365282568235126	Pemt	heart
16.6300502964956	2.19544750443126	0.942210404994993	2.3301032261928	0.0198006959634195	0.0771679525039563	Cdh1	heart
33.8092370901026	1.63225933837428	0.720056788741515	2.26684806517424	0.0233995087482888	0.0870170253523713	Ckmt1	heart
822.552715128242	0.159360284625008	0.187411643790068	0.850322217991527	0.395145967315257	0.606003592983489	Bcl6b	heart
91.8729479224257	-0.686062766029757	0.229906729653543	-2.98409170998873	0.00284421508360678	0.0173011460547173	Clec10a	heart
126.6679306546	-0.421304558701987	0.203308920680179	-2.07223843052481	0.038243211087021	0.123999613134818	Alox12	heart
210.756278874782	0.180527374900666	0.2318792826772	0.778540337094188	0.436250536421473	0.641746880747663	Arvcf	heart
2086.75042098073	-0.390096209168846	0.235196485022462	-1.65859710501877	0.0971970055415362	0.241138909245879	Comt	heart
174.802742504622	0.00525256457563479	0.201107196931228	0.0261182327424662	0.979163034397565	0.99074670029803	Rtca	heart
1189.67237827228	0.139096378824912	0.14116496591494	0.98534631396239	0.324453990550952	0.53607500749859	Dbt	heart
5291.4503330162	0.463397062321767	0.10032359451137	4.61902371599385	3.85549793193961e-06	6.6252410306529e-05	Dazap2	heart
474.075132111968	-0.505155764505455	0.171690683333952	-2.94224331044735	0.00325843799051891	0.0192292940928374	Mcts1	heart
134.121515698141	0.125472382946708	0.205618308583747	0.610219896326031	0.541716151553713	0.729293807979767	Rem1	heart
842.658967202312	-0.171007462740672	0.132389016760886	-1.29170430391167	0.196459566419484	0.388984809784856	Trappc10	heart
528.087951389013	0.384963775399222	0.193458719568537	1.98990139218222	0.0466017989869769	0.142980648837039	Ccm2	heart
883.70593504191	-0.449822367980419	0.18282887544402	-2.46034641348625	0.0138802967393694	0.0586142892949415	Tbrg4	heart
27.6855997027481	0.0493042768164425	0.439317644593082	0.112229220527008	0.91064166089233	0.959790547721406	Mx1	heart
172.241128366721	0.323081001120569	0.227725808359581	1.41872808992479	0.155978304513422	0.33423903351514	Fap	heart
6604.09615386803	-0.168406623302958	0.101223776425851	-1.66370618889446	0.0961711588918965	0.239281576327322	Ndufa9	heart
20.8131038817486	1.03518142595747	0.588671451308327	1.75850455063988	0.0786616979642812	0.208117162502356	Lck	heart
31.8638727623567	-0.107565859065059	0.413228519492339	-0.260305990489732	0.794627752102889	0.890396375887877	Cttnbp2	heart
2031.75613670583	0.403362294634483	0.163412213112113	2.46837299950003	0.0135728805649371	0.0574762204928623	Galnt1	heart
656.932759864346	-0.17887996324502	0.130957415205541	-1.36593993523973	0.171957816822454	0.356708831105978	Mkrn2	heart
215.927701898314	0.0672473231361967	0.190839833230274	0.352375717364277	0.724556510357678	0.850509181251382	Pparg	heart
953.614912890147	-0.388502484578312	0.11942817150271	-3.25302212777741	0.0011418460500207	0.00833120187512432	Raf1	heart
72.8214161929764	-0.0934535909424514	0.2924901234895	-0.319510244747824	0.749339624014462	0.865200485411934	Sept1	heart
667.621429504661	-0.104071427388355	0.173524604350036	-0.599750264685353	0.548672683870619	0.734794866385034	Pdgfb	heart
821.046978689324	0.472503281107384	0.150106982542314	3.14777682626583	0.00164517246440002	0.0111786519443595	Acvrl1	heart
197.64356656918	0.263217621594563	0.173978214588504	1.51293437639379	0.130296328832166	0.294339153586373	Grasp	heart
356.353544760209	-0.113270641633014	0.171438851026926	-0.660705790749982	0.508801009445759	0.703238322080723	Acvr1b	heart
2011.24945859957	-0.226870323652342	0.150351455252962	-1.50893334068925	0.131315818518285	0.29570441126646	Tom1l2	heart
249.791247418941	-0.0212340518783815	0.199299682733468	-0.106543330060283	0.915151278612324	0.962765469397067	Zfp385a	heart
1035.59679478353	0.520545762527775	0.177631192558936	2.9304862227678	0.00338432000439879	0.0198519613671613	Itga5	heart
307.595423172111	-0.544811135050749	0.14776563071041	-3.68699495567047	0.000226917853275451	0.00222578518338623	Wdr77	heart
20152.116440651	-0.387268473756232	0.0935150649087889	-4.14124156502441	3.45430926722531e-05	0.000450579308241129	Atp5f1	heart
55.3774399775121	0.693705924694236	0.346765952991365	2.00050183332592	0.045446102150758	0.140595756503534	Sox9	heart
1015.71665170068	0.255510616271385	0.124096468499811	2.05896766733352	0.0394973359382833	0.126800388598103	Hnrnpd	heart
1239.05458057245	0.101987510267991	0.138689724750465	0.735364573341612	0.462117491344451	0.66251245685654	C1d	heart
641.397034926537	0.0784302077208332	0.139952189261893	0.560407151431311	0.575201754801479	0.753519874633519	Gm2a	heart
636.915189425604	-0.040117666405945	0.157264795804254	-0.255096292852973	0.798648727347154	0.893104109165197	Krit1	heart
1288.78691373308	0.316282699024362	0.113538488162912	2.78568707529854	0.00534144084163953	0.0284793352259983	Clcn4	heart
2581.90977952988	-0.871383448289825	0.126177339836072	-6.90602171056953	4.98433734046379e-12	2.83359577805366e-10	Hk2	heart
1960.74285462445	-0.442393404142088	0.180353084959563	-2.452929509031	0.0141698103214721	0.0595603487449679	Myo18a	heart
174.457912162062	0.430322238022528	0.296955701671288	1.44911256325655	0.147306150091915	0.321472346745695	Cd52	heart
110.596740157738	0.394000666866719	0.220249653458197	1.78888211936052	0.0736338020165417	0.199376780058284	Loxl3	heart
1882.30038834949	-0.212596879481296	0.120844809609407	-1.75925536370531	0.0785341444430049	0.207860303934114	Kat2b	heart
1690.11044563258	0.104422074074907	0.105958312993665	0.985501478125182	0.324377805733933	0.53607500749859	Rab5b	heart
300.124474998851	0.66777168493298	0.157552216538613	4.23841504488972	2.25103332698928e-05	0.000312442509801035	Icosl	heart
1032.28956061091	-0.511915639232624	0.188533220085686	-2.71525431433231	0.00662248936587097	0.0336025455217343	Spg7	heart
4443.30384869082	-0.403271534978845	0.152206129430886	-2.64950916554226	0.00806087857278876	0.039097983379712	Rpl13	heart
1103.48670572805	-0.113282929822429	0.139305716370487	-0.813196563457236	0.416105369420514	0.624020846380908	Chmp1a	heart
989.99969053783	-0.182034401469078	0.158999919460349	-1.14487102941252	0.252262586412407	0.456916025796383	Rpa1	heart
636.27773892195	0.38645482712031	0.177823304664466	2.1732518572271	0.0297613667362407	0.103823484670196	Serpinf1	heart
470.046279884719	-0.067035519785504	0.148519072968349	-0.451359670146811	0.651730345248918	0.805240505564917	Tubgcp3	heart
316.009986587248	-0.268798396861038	0.194307402914461	-1.38336673142284	0.166552446067278	0.348694425984646	Polr3d	heart
25.1458034698161	0.581304564526206	0.439770830686423	1.32183520134536	0.186223033718235	0.375584193947022	Tcf7	heart
5960.87291584914	0.422119064259451	0.155043793446253	2.72257956849967	0.00647744329756374	0.0330509485235451	Ddx3x	heart
76.4250812126051	0.521200955263559	0.26214401973324	1.98822370921884	0.0467869539311749	0.143396774364758	Kcnn3	heart
687.364504525377	0.664665161927602	0.149161781319334	4.45600177236184	8.3502341647135e-06	0.000131864114517767	Usp32	heart
502.420082952743	0.277347444480288	0.158244363733652	1.75265290931375	0.0796616034385329	0.209907863521696	Car4	heart
242.70423337682	-0.447140164477245	0.155195463925217	-2.88114196876724	0.00396237120454958	0.0225636864419343	Txnrd3	heart
270.858203261229	-0.171866757924202	0.190924501915986	-0.900181779705939	0.368023520809893	0.580230288644579	Zfp512b	heart
1698.24240451081	0.478222161030305	0.102976772165416	4.64398088009707	3.41759203819696e-06	5.98583129257501e-05	Dnajc5	heart
1273.08497371007	0.0875426721026992	0.109595151623719	0.798782343978733	0.424416630048323	0.63155638568866	Tpd52l2	heart
416.442784865635	0.220957537071893	0.173838198378351	1.27105284760826	0.203709848436161	0.397286616932958	Fmr1	heart
39.3149263788994	-1.35619646713422	0.358046930891325	-3.78776174329465	0.000152010512040279	0.00159540878944428	Bcl11a	heart
483.342776937523	-0.559369774854948	0.180336619502741	-3.10180914113479	0.00192341924355228	0.0126901025914058	Pxmp4	heart
125.602061852272	-0.0468190385917702	0.219868238606819	-0.212941345636987	0.831372712708332	0.911104360818673	Dlg3	heart
45.7201553896698	-0.351106780192205	0.314974640844177	-1.11471443939483	0.264972811353395	0.47086338084211	Gnb1l	heart
138.655849082606	1.0455243169345	0.22285631938016	4.69147260370478	2.71245597503621e-06	4.92137623981304e-05	Dbh	heart
104.070824883138	-0.855757688179397	0.228762342249092	-3.74081537969038	0.000183424223562898	0.00186624914712318	Mmp11	heart
410.311619780689	0.324437193615813	0.167656705583786	1.93512804922483	0.0529745842757764	0.157196004143697	Smarcb1	heart
410.2378232674	0.0420039904476047	0.170685269893786	0.246090306877348	0.805612326384587	0.896921630452167	Hip1r	heart
130.000311765026	-0.292484518140954	0.243851057731448	-1.19943920219967	0.230357211957875	0.43078314144096	Nsun5	heart
54.6139800532813	-1.36771337793094	0.302314108214231	-4.52414670955987	6.06396519868379e-06	9.93238189325829e-05	Top1mt	heart
61.7838004094394	-1.25140550640132	0.288579991235367	-4.33642506205729	1.44818768073759e-05	0.000212691848395949	Gm38393	heart
337.510238074072	0.0693264511285175	0.154658416174709	0.448255276649175	0.653968973545995	0.806449296025192	Mmp14	heart
81.8039074886287	0.208695229388341	0.241031210854881	0.865843177106188	0.386576167667185	0.5978063279668	Slc7a7	heart
1445.90320080901	-0.294928904115817	0.131662781213868	-2.2400324632118	0.0250888154195618	0.0914322525601571	Oxa1l	heart
186.883649361095	-0.0819870268380693	0.1789932472297	-0.458045362643521	0.646919851277515	0.802881534121306	Heatr6	heart
639.247876678335	-0.278457337957505	0.134754207157714	-2.06640923375107	0.0387898547920405	0.125088342893548	Ilf2	heart
1537.32151922689	-0.235106646363846	0.103007238715927	-2.2824283933309	0.022464060608086	0.0844119093739259	Chtop	heart
1468.33183469318	-0.113598243878717	0.128163945445862	-0.886351020823573	0.375428403622466	0.586684817205924	Snapin	heart
963.724791809612	0.499778960369028	0.139346402402652	3.58659392529473	0.00033502542522184	0.00309275162498429	S100a6	heart
273.079401146754	-1.42778739694899	0.332599136180041	-4.29281751404221	1.76419999949567e-05	0.000253323289660782	Scn4a	heart
641.357089453034	0.586444022383925	0.153326476523589	3.82480596750492	0.000130875119366962	0.00140603159735655	Icam2	heart
143.758418623675	-0.0906675144303725	0.230761901110034	-0.392905041925182	0.694389617531189	0.830864453252641	Mapk7	heart
718.816510521909	-0.131536519584085	0.121498109300982	-1.08262194647191	0.278976261949015	0.487556310750912	Epn2	heart
81.223193477743	0.0161944762923321	0.33072923897631	0.048965964855294	0.960946419498893	0.982035274334724	B9d1	heart
551.595514392828	0.143327075514437	0.127798749259841	1.12150608941425	0.262072500953217	0.468025811911739	Sec24b	heart
181.485314120678	0.26346893998419	0.22396256885084	1.17639720483677	0.239436188189147	0.44170732174861	N4bp3	heart
265.211507982911	0.170059367463741	0.156155179857165	1.08904083501612	0.276135878589235	0.483645433565022	Rmnd5b	heart
232.859080662965	-0.469632550261102	0.18623304106754	-2.52174666519452	0.0116773772641556	0.0511973442776797	Nhp2	heart
349.520157416094	-0.10590059034378	0.165686467625205	-0.639162581360206	0.522717171638309	0.715201137248375	Vps9d1	heart
166.602268576847	-0.0241167888005812	0.25577326146162	-0.0942897184121805	0.924879017046697	0.967051062041929	Zfp276	heart
113.826349939092	-0.140288305172158	0.269205261945943	-0.521120219412086	0.602283026464049	0.771311208285666	Mfsd10	heart
1284.46473437054	0.678430550471747	0.127747848538934	5.31070040107157	1.09204727062299e-07	2.77644031410337e-06	Luzp1	heart
553.486422838036	0.51170667389147	0.166906405944913	3.0658300440569	0.00217066661751443	0.0139956496586079	Kctd10	heart
2133.95221372129	-0.146549250915371	0.118627400146027	-1.23537438007554	0.216691203220424	0.414661259009742	Poldip2	heart
616.664979899834	-0.0645033237541141	0.128685194657748	-0.501248989253719	0.6161959006103	0.780774226219068	Ift20	heart
2108.47205391076	0.145716008331597	0.132635128358669	1.09862304304147	0.271932522429649	0.479088284225766	Col6a1	heart
60.7324327201626	-0.0432576618496615	0.304395388608362	-0.142110108984986	0.886993033403964	0.945036150848328	Pcbp3	heart
948.306669752177	0.191371828009283	0.185234335900055	1.03313366325636	0.301541351629394	0.510703848266069	Lgals9	heart
1827.99117877283	0.0106468157007667	0.122988711673857	0.0865674219679612	0.931015362159668	0.970344022710756	Araf	heart
189.812408032225	0.246625016535002	0.20580427247795	1.19834740827077	0.230781797508915	0.431281584058572	Cfp	heart
56.8586647637264	1.11852224029787	0.323092404422284	3.46192675837701	0.000536323086041884	0.004559593131576	Timp1	heart
225.469001684293	-0.513812401054071	0.169533601084162	-3.03074079573758	0.00243954576979975	0.0153246604434382	Uxt	heart
261.406587380396	0.0930447689725285	0.19443962326172	0.478527819647583	0.632274578611945	0.792099380275583	Cnnm3	heart
451.420964839948	-0.00246618216390573	0.163422198151856	-0.0150908639817345	0.987959689619892	0.994189095518945	Lman2l	heart
407.057254811988	-0.0627167015314654	0.136558753819216	-0.459265332887362	0.646043639355746	0.802371900898118	Mcm3ap	heart
769.856090920585	-0.263481783474447	0.206438969868996	-1.27631805003507	0.201843112070063	0.39517110361371	Pcnt	heart
221.970262536393	0.749299314729173	0.169874226051971	4.41090642261372	1.0293880013333e-05	0.000157278498210431	Mxd1	heart
182.113708801148	0.401207762328853	0.184224311112832	2.17782202525445	0.0294192894634545	0.102975060400044	Gmcl1	heart
950.521419303977	0.24033631069431	0.121508273907368	1.97794193733285	0.0479352571953704	0.145991766956557	Snrnp27	heart
22.3807954727501	0.042843542910035	0.430512663170427	0.0995174975679509	0.920727395811755	0.965227140563829	Oas1c	heart
403.489052304215	0.571320211021163	0.14285333940733	3.99934795638279	6.35172377383537e-05	0.000769652923358879	Ocrl	heart
4973.79594723785	0.25222561608463	0.13091278029868	1.92666915719896	0.054020873960427	0.159640633380131	Calm1	heart
3152.74746791322	-0.498996323617464	0.197739354358012	-2.52350537523258	0.0116191284225259	0.0509972699673143	Agpat3	heart
50.2334438058625	0.43598958570237	0.409159236394497	1.06557434593021	0.286616101162189	0.495575983304639	Slc26a3	heart
138.754726869004	0.0721376511689265	0.236785313021635	0.304654246702942	0.760629499795683	0.870786113040133	Sema6b	heart
30.9622389369398	0.764238098330814	0.387395516567826	1.97275927481471	0.0485229950891054	0.147267384161778	Uhrf1	heart
584.133371656843	-0.379765210271212	0.213353835563078	-1.7799783597466	0.0750795023128596	0.20153152263558	Dpp9	heart
863.779640022916	0.320080560667026	0.128370142776413	2.49341905948116	0.0126519426455331	0.0544633040694707	Ramp2	heart
20.3763355285604	0.405781501269994	0.51605976254985	0.786307189045371	0.431687541777851	0.637992289863193	Lsr	heart
573.796940565779	-0.221752071380379	0.177372555821577	-1.25020508586145	0.2112246394462	0.407546854098567	Gramd1a	heart
29.5389454490127	-0.0145326528990926	0.416770689598653	-0.0348696615711807	0.972183672453837	0.986825581190174	Hpn	heart
937.759771632373	1.10796271689546	0.200433341879697	5.52783636946227	3.24204217097535e-08	9.13934367371647e-07	Ckb	heart
1147.06880217704	0.256375720751816	0.14359469856909	1.78541215871184	0.074194487903363	0.200233734415468	Sp1	heart
40.5814555203359	0.188193665698844	0.361452897825326	0.520658893125793	0.602604415149262	0.771610043517574	Itgb7	heart
247.888736192422	-0.0180166006375488	0.160747569241446	-0.11208008135095	0.910759910682281	0.959790547721406	Myg1	heart
512.165283563909	0.310552339075404	0.158583387029979	1.95829049241265	0.0501959357945315	0.151252947875572	Rarg	heart
3385.84992477946	-0.0701558165226497	0.14109381475766	-0.497228150242786	0.619028172441728	0.783271852433918	Pfdn5	heart
445.216204466923	-0.135554404971685	0.159905639161258	-0.847714975423628	0.396596724265645	0.607245618435692	Efnb2	heart
132.090442822787	-0.183871292593021	0.209341501924264	-0.878331773216869	0.379763697875272	0.591157546355985	Rrp15	heart
97.919990934958	-0.238965029354626	0.239400327043848	-0.998181716396979	0.318191250656865	0.529658660554179	Rnd2	heart
336.632564209769	-0.0309647454299132	0.14721726511284	-0.210333654861604	0.833407269963647	0.912454565188895	Srr	heart
133.657205542116	-0.648589886052923	0.217762522322922	-2.97842750503746	0.00289731559653156	0.0175615166588523	Sync	heart
5556.74138692891	-0.420668537102708	0.110946357977187	-3.7916389935865	0.000149656351820449	0.00157312115888922	Fndc5	heart
32.6393389479318	1.60187760200141	0.475721387144914	3.36726000824815	0.000759190729571641	0.006008351690415	Cnn1	heart
773.913180205165	0.124807037573204	0.136482276095696	0.914456009553171	0.360477282807659	0.572967386606209	Fbxo9	heart
386.224531716312	-0.00399969518538889	0.182708784146668	-0.0218910940930906	0.982534828958393	0.991752089685495	Vps50	heart
553.979541964566	-0.138027648349209	0.131989966123983	-1.04574349401343	0.29567947597803	0.504092311663656	Hars	heart
998.267484841705	0.0322891894041954	0.128680138039901	0.250925977357774	0.801871339773412	0.894653595117482	Zmat2	heart
20.4774020430557	0.0445779200960871	0.522345691364591	0.0853417972676877	0.931989663305192	0.970869524323571	Ube2c	heart
1137.69420715108	-0.245961757925685	0.166631661093487	-1.47608057383339	0.139922263228746	0.309969046840884	Smg5	heart
1883.31402606979	-0.106419898157317	0.127057640072077	-0.837571814626395	0.402271228069388	0.611746392752868	Cct3	heart
777.163397473922	0.405480250871935	0.120967458157525	3.35197793727232	0.000802364127369614	0.00626643168507786	Glmp	heart
1940.7361962809	-0.552509052650307	0.207278338460382	-2.66554169024232	0.00768644005930555	0.0376837183504006	Mef2d	heart
23.6629877315145	-0.768510636345051	0.436628613713593	-1.7601014047356	0.0783906146601745	0.207601231836844	Tmem79	heart
835.652508983816	-0.628716459415429	0.132636545979411	-4.74014499377136	2.13565334631742e-06	3.97528707464597e-05	Snd1	heart
297.272702634016	0.57169491219488	0.151566895380571	3.7718982813457	0.000162010303656491	0.00168738059777798	Col18a1	heart
61.390947340443	-0.968952660004335	0.345851063292486	-2.80164719107685	0.00508424419205229	0.0273754647815159	Slc19a1	heart
2169.47023023693	0.095651024435214	0.10811583105203	0.884708774880362	0.376313721783693	0.587731733060521	Kpnb1	heart
1404.02302470765	0.276737718186371	0.114951035766314	2.40743997077987	0.016064803011265	0.0655075230979377	Npepps	heart
780.825550888629	0.038016190351918	0.143407497541551	0.265092069826427	0.790938536230603	0.888487188237308	Mrpl10	heart
272.21065302549	0.328620408002075	0.181079676291852	1.81478349603644	0.0695571876513918	0.192229748494144	Cyp51	heart
3211.80483688541	0.0666819943337883	0.109319080471448	0.609975807024871	0.541877833821306	0.729293807979767	Tcf25	heart
461.355572805744	0.241326862698021	0.16626906864733	1.45142367525914	0.146661921153018	0.320425180498283	Tubb6	heart
1080.36215894677	-0.492806832213023	0.150670900278608	-3.27074990128663	0.00107262725003396	0.00788944808596408	Def8	heart
448.98955793957	1.42789076408774	0.236179766245596	6.04577939417097	1.48689434698811e-09	5.52784372487894e-08	Meox1	heart
43.4641443901797	2.09790356043895	0.450110602042388	4.66086235454054	3.14887263696943e-06	5.63082808110234e-05	Sost	heart
98.3848240823812	-0.451968337621179	0.39679493078537	-1.13904766052985	0.254683275978667	0.459839084977926	Irx2	heart
1672.50701307033	0.955558509942983	0.176710290896099	5.40748648591623	6.39153638203599e-08	1.70324457805662e-06	Col1a1	heart
243.81824230403	0.42402204408321	0.190334642570657	2.22777124729568	0.0258957731394776	0.0936200129080636	Itga3	heart
1801.59280298702	-0.178300087636987	0.18439968095092	-0.966921887920421	0.333583083809894	0.546256312470258	Sgca	heart
38.1852204623247	0.283592749248716	0.333739167552031	0.849743682555637	0.395467606519863	0.60633329850062	Foxm1	heart
150.56561369777	-0.502624613974251	0.186343192656172	-2.69730601268413	0.00699029996894872	0.035142097559446	Itfg2	heart
51.4715214557234	-0.62412788897722	0.373903127829092	-1.66922350342708	0.0950730938216842	0.237491265489392	Nrip2	heart
191.737360044504	0.0455505465772866	0.174089833091634	0.261649665396087	0.793591550013697	0.890001899423547	Tulp3	heart
147.735679195549	0.0943616254044974	0.211948740666216	0.445209653560062	0.656168251046359	0.807839132660511	Gtf2h4	heart
2440.00756346153	0.194567174617902	0.119310468268045	1.63076364917774	0.102940200408122	0.251120345855251	Tubb5	heart
648.642064774879	1.68860638670583	0.171966648121813	9.81938303239881	9.29104232772529e-23	1.81095687884977e-20	Ell2	heart
2995.76531140946	-0.0540097881728494	0.167011396290918	-0.323389836695751	0.746400025534074	0.863658606345594	Jup	heart
286.399378111696	-0.676417142089528	0.280432309236353	-2.41205139283517	0.0158630453377345	0.0648204224582359	Fkbp10	heart
321.399828250565	-0.200554104016948	0.151804312264911	-1.32113575052443	0.186456104505779	0.375942577787392	Nom1	heart
943.885045754793	0.267286802319113	0.119057757243916	2.24501795184599	0.0247669801385179	0.0906039075144369	Ergic1	heart
36.6333984031536	0.186703365961729	0.352275495026887	0.529992487690575	0.596117139350503	0.767023133850102	Acap1	heart
1938.5501106055	-0.854828216851272	0.187234417741372	-4.56555064588634	4.98184897621653e-06	8.3606823408977e-05	Tcea3	heart
832.864017277442	0.782718157338988	0.17165133266993	4.55993055902506	5.11705388958609e-06	8.55601510655791e-05	Ifrd1	heart
367.085481042817	0.217160287366175	0.183401497478777	1.18407041573531	0.236385189895348	0.438036218854096	Stk38l	heart
306.959887427268	-0.159335881933447	0.159862630100468	-0.99670499499045	0.318907724447261	0.530178748916586	Brpf1	heart
2633.39782452226	-0.536954216504169	0.105420522068526	-5.09345055372743	3.51604781669945e-07	8.04915376024282e-06	Akr1b3	heart
375.17141156598	-0.488981331194468	0.161597106807605	-3.02592874869129	0.00247870705507888	0.0155248088046635	Gstt1	heart
72.7686974161804	0.329398225233575	0.249749433371294	1.31891480507934	0.187197596002104	0.376636874403415	Gstt3	heart
196.673638008602	-0.668851351089641	0.270424218204337	-2.47334116570967	0.0133856290682297	0.0568597518701515	Ddt	heart
272.903515959213	-0.316675586188761	0.154360299645492	-2.05153518693632	0.040214856619577	0.128529281732844	Ddx18	heart
1293.21582574958	-0.119830598982002	0.116625374460433	-1.02748308021644	0.304193048574031	0.513491988414755	Ubl3	heart
493.226648765362	0.753503449398381	0.152921398847342	4.92739050962112	8.33350940922397e-07	1.76009910804105e-05	Gramd3	heart
268.177279348359	-0.675150608112678	0.154744899998247	-4.36299101372858	1.28296215349372e-05	0.000191517895210813	Eef1e1	heart
3218.90732791617	-0.463403125853964	0.179518652684755	-2.58136477142421	0.00984105378242058	0.0453313091854647	Akt1	heart
121.934873999603	0.63362191736029	0.249015411800774	2.54450884295958	0.0109431540879427	0.0487458029304243	Cldn15	heart
168.534613979716	0.0801609012653974	0.225612587033942	0.355303320259067	0.722362368326474	0.848988901149661	Il16	heart
299.24087043407	0.282569532825649	0.157341762929845	1.79589657293747	0.0725109676011549	0.197472982425181	Tcirg1	heart
180.900433232061	0.103086582725997	0.189822905150201	0.543067142737212	0.587083574386954	0.761133436804979	Naglu	heart
237.404640507003	-0.0728374731516404	0.190023681178341	-0.383307347273633	0.701491892191001	0.835459321932702	Coasy	heart
322.539223089499	-0.23864815911442	0.175409270986263	-1.36052192550934	0.173664819397121	0.358833896261058	Smo	heart
22.5143177603959	-0.989997967716925	0.439693369671699	-2.25156446742901	0.0243498086330354	0.0895454081308907	Tspan33	heart
363.580521809839	0.0348990649054881	0.163173688960175	0.21387679060198	0.830643139868579	0.910827384588268	Crnkl1	heart
669.452185221714	-0.0636914678664514	0.212380487785392	-0.299893217736701	0.76425860783484	0.873255543530572	Rin2	heart
761.751198260699	-0.090754028551695	0.15379861519319	-0.590083522128577	0.555134655446749	0.739962606380954	Chordc1	heart
1290.32502184871	-0.178497511450512	0.106523219651316	-1.67566763410635	0.0938033128645775	0.235613475832897	Rtcb	heart
353.030369827191	-0.450650663585307	0.145302712233936	-3.10146078250601	0.00192568378313684	0.0126989026278971	Pwp1	heart
245.79881534314	-0.185729782602072	0.165998523823935	-1.11886406170132	0.263198136847279	0.468931232586091	Fbxo7	heart
4689.60514629094	-0.447902476352572	0.112027633165399	-3.9981428125977	6.38414299776516e-05	0.000772894827520034	Capns1	heart
105.21219713892	-0.296845662351054	0.288980721132726	-1.02721614503383	0.304318697397631	0.513495462193084	Lrp3	heart
1026.95805927124	-0.32820391733559	0.152242207330844	-2.15580109543706	0.0310991999173606	0.107232116166911	Clpb	heart
3549.0086788131	0.108024550836272	0.166273740609725	0.649678959769274	0.515899617488433	0.708998225323547	Sept7	heart
324.316037173625	-0.470600666262572	0.175349291625518	-2.68378994805181	0.007279282473801	0.0361812949667462	Zdhhc4	heart
3047.60934133982	0.0867115086925333	0.120893501341126	0.717255334080024	0.473216562013838	0.671859185443997	Rac1	heart
285.92956236951	-0.133947693323895	0.159627080716138	-0.83912887915361	0.401396991879281	0.611029614007354	Nup214	heart
70.1144435834085	-0.00905033954699199	0.312399427144581	-0.0289704101883753	0.976888189933749	0.98938022243359	Aif1l	heart
62.2173944242493	0.544458975796882	0.342199500356873	1.59105719099261	0.111596705510089	0.26531197943538	Cpa3	heart
900.508843292712	-0.224101707583156	0.133584336107382	-1.67760468115822	0.0934242983572812	0.234877672155287	Ltbp1	heart
4279.61511463643	-0.124386440447194	0.148508254512976	-0.837572570326893	0.402270803493742	0.611746392752868	Ugp2	heart
396.402635243428	-0.746066022438117	0.222440337414949	-3.35400508337827	0.000796508995082304	0.00622783308246588	Trmt1	heart
788.789996935408	0.237299571360039	0.157409239354094	1.50753267301058	0.131674175507215	0.296218046268827	Nacc1	heart
1249.23989160469	-0.652045996438352	0.237350807319293	-2.7471825514425	0.00601096671303349	0.0312178708695809	Nfix	heart
441.007713213935	0.653281867927689	0.217203292943001	3.00769780732157	0.0026323475094038	0.0162661908597398	Slc1a5	heart
2898.38910261989	0.0847061947384186	0.111794626783412	0.757694686905893	0.448633780443811	0.651811234200336	Uba1	heart
2129.93766927451	1.2389026465026	0.120553667068951	10.2767727985745	8.96802809993302e-25	2.22472318900884e-22	Vwf	heart
285.452873039587	-0.0897742167402146	0.229702791473576	-0.390827713343404	0.69592458870067	0.831877504678534	Siae	heart
95.7145490530541	0.694698423423059	0.237107633330385	2.92988637128806	0.00339085972853948	0.0198817748758886	Vsig2	heart
1337.3061714798	0.247538700301162	0.138020862534406	1.79348756235642	0.0728949976379914	0.19808391710272	Esam	heart
69.367721708814	-0.073017590873362	0.254753981025186	-0.286620018967018	0.774403284362327	0.879031481850216	Spa17	heart
398.59446648926	0.221557322843736	0.142152266408184	1.55859156130191	0.119093081607131	0.277382383995851	Fam50a	heart
707.098308010062	-0.154286962350545	0.14597404832596	-1.05694788984698	0.290535370443609	0.499693003193319	Emd	heart
494.937110424251	-0.359389680295613	0.139559308313972	-2.57517527592699	0.0100189300822741	0.0459611818151316	Taco1	heart
46.8902116390974	0.840063645533309	0.370587160261538	2.26684498443077	0.0233996970109829	0.0870170253523713	Gria3	heart
926.862164810285	-0.0880771858021604	0.16595506740353	-0.530729113489467	0.5956065082721	0.766879965281036	Sipa1l2	heart
176.49462500892	0.130138820938625	0.222490233739452	0.584919251291835	0.558602013370454	0.742341632516216	Ap4e1	heart
324.077793917685	-0.312322349525713	0.17585912407152	-1.77598035458595	0.0757361552305622	0.202656227096645	Blvra	heart
52.5278571373625	0.00743167708769475	0.315012398609153	0.0235916970903595	0.98117829507164	0.991289776743463	Pdzd4	heart
504.650551890965	-0.233649724121373	0.177118391660599	-1.31917257113028	0.187111425930681	0.376541046518911	Srpk3	heart
9278.67137503362	0.0317264617387244	0.110294979013408	0.287651006623497	0.77361389655554	0.878996405908875	Idh3g	heart
112.078432862397	-0.749081382290058	0.271778492812828	-2.75622023853795	0.00584736100755669	0.0304858210115031	Pnck	heart
899.018071866579	-0.177284100881661	0.134248229629731	-1.32056937637559	0.186644989401139	0.376153484980851	Ssr4	heart
1032.844527353	0.0113340850835905	0.124684740084895	0.0909019425783252	0.92757050663108	0.968459805010807	Bcap31	heart
746.449064104186	0.0563818270949854	0.124604683905955	0.452485615529023	0.650919181560318	0.805107543578006	Fam98a	heart
42.5406511242835	1.92229740570171	0.495285908267641	3.88118735787441	0.000103947719784801	0.00115776546019905	Ltbp2	heart
1092.9866853903	0.16142790165012	0.135534551099874	1.19104612322186	0.233635478629704	0.434590657181143	Kmt2a	heart
480.182186592983	0.132797172977074	0.172272431276906	0.770855626711505	0.440792511115592	0.645298877798842	Ift46	heart
181.183056109142	-0.226917607189855	0.2376936709051	-0.954664069622843	0.33974760553036	0.552966280550665	Tmem25	heart
184.993966391039	-0.155390475040807	0.309799613682727	-0.501583824439324	0.615960300041786	0.780548187403188	Trappc6a	heart
931.149852743022	0.152370091785689	0.113706826033601	1.34002589906663	0.180236925026601	0.367861272260724	Supt6	heart
114.695656924228	0.461064259278351	0.237853202918716	1.93844040618581	0.052569514790703	0.156276019840613	Unc119	heart
167.896919208353	-0.138450387857053	0.209084509771953	-0.66217429501621	0.50785952597897	0.702976095410071	Rab34	heart
741.889477568282	-0.0417036069012359	0.12995068480247	-0.320918715931563	0.748271990248718	0.86461915946422	Sdf2	heart
17.5325342065792	-0.181765517129289	0.498431613172185	-0.364674936993809	0.71535406944833	0.844950191856302	Ccne1	heart
46.8962093556592	0.66892015188099	0.336427300079394	1.9883052050863	0.0467779454797368	0.143396774364758	Bbc3	heart
40438.0484527974	-0.0152959714393206	0.158336830239292	-0.0966040018371214	0.92304087835573	0.96622284735146	Mybpc3	heart
4580.56449680719	-0.0744352912810131	0.130364608269847	-0.570977754383587	0.568014722392633	0.748502305613781	Psmc3	heart
586.806669653467	0.155272008274061	0.134056655045395	1.1582566208405	0.246759328183866	0.450319242148893	Acp2	heart
234.172575305405	-0.766779539756543	0.261491228570142	-2.93233369222121	0.00336425053597328	0.0197512195838293	Rapsn	heart
397.074108557369	0.157677604742278	0.202478081075934	0.77873913020316	0.436133400690078	0.641712942846482	Slc39a13	heart
990.609036674324	0.192953981223147	0.135119148598879	1.42802839733663	0.153283685066074	0.330290997953492	Celf2	heart
314.249479917738	-0.157810414028907	0.199605761372588	-0.790610516168093	0.429171308260967	0.635788635169668	Nr1h3	heart
89.3749791715911	-0.159480510429033	0.231761657012939	-0.688122929756796	0.491375372026432	0.688541190913899	Ddb2	heart
109.345711183084	0.1368964451519	0.226885065915099	0.603373538931501	0.546260221292703	0.732549455541596	Spi1	heart
640.745968493912	-0.0769026478428435	0.143664978869482	-0.535291540415765	0.592448275174949	0.76497908801714	Sf3a1	heart
1140.43019079862	0.00823181849720455	0.124056853081293	0.0663552096699597	0.947095029074517	0.975990901064825	Stat6	heart
400.775844842624	-0.177819126497048	0.183135856646356	-0.970968382452954	0.331564023465928	0.544060076508614	Vrk3	heart
137.983643161446	0.110580740489485	0.261702090744692	0.422544352530084	0.672627734473202	0.817789015954912	Smg9	heart
336.583823751772	-0.141034740653891	0.151876609961112	-0.928613962940065	0.35308918304468	0.565530978398102	Paxip1	heart
1718.63009732788	0.0973136951306981	0.137874427668118	0.705813955325674	0.480303842370228	0.678413617414504	Rmnd5a	heart
135.362403373831	-0.0080395394473385	0.229239828269176	-0.0350704304223191	0.972023580006282	0.986798942766626	Mov10	heart
263.783045190838	-0.770704627363844	0.193271717097334	-3.98767413535064	6.67242263930974e-05	0.000797185065593188	Ppm1j	heart
1290.03319508043	0.432518771975273	0.120966255855725	3.57553244014706	0.000349515830348362	0.00320914804123354	Rhoc	heart
186.606362300339	-0.695490837791819	0.251913941406038	-2.76082710591558	0.00576551893512022	0.0301860093441213	Tead3	heart
430.33349442814	0.025684221410304	0.245941875951292	0.104432078965644	0.916826466521245	0.963504606733102	Ppard	heart
46.6866677795283	0.224524143191	0.317497476720893	0.70716827582342	0.479461910673448	0.677974744453159	Def6	heart
286.893677931538	0.141009913613833	0.2029765904042	0.694710229061545	0.487236916289448	0.684711142842026	Peg3	heart
38.5180133458286	0.459684027468885	0.345704131136813	1.32970359930979	0.183615948481352	0.372252006103948	Zim1	heart
22.3737823242567	-0.904468463196983	0.433502773504961	-2.08641909227977	0.0369406770401572	0.120780876476373	Metrn	heart
261.152108793566	-0.416492223987129	0.240178046529399	-1.73409780787832	0.082900730418619	0.215817127615271	Lmf1	heart
637.227548424976	-0.216182064342392	0.183241977039621	-1.17976278053172	0.238094576522588	0.43999466667292	Narfl	heart
145.393087223699	-0.243760112229842	0.402702755480368	-0.605310266474511	0.544972861182044	0.731652804837005	Angptl4	heart
35.5167969349694	0.295549825169367	0.387077661864685	0.763541413745248	0.445140573784821	0.649363625437838	Dbf4	heart
263.972569081538	0.171156198629397	0.182606848658572	0.937293425119091	0.34860764406911	0.561463502355661	Daxx	heart
275.447335959622	-0.230320945373209	0.159921135970694	-1.44021579120984	0.149806356919638	0.325382165376525	Cd320	heart
162.949496732455	-0.505551639398867	0.213839657040026	-2.36416222508363	0.0180708976330697	0.0717367842029688	Ipo4	heart
486.924591480038	0.0433928233126784	0.14992327796396	0.289433528281775	0.772249640549296	0.878033855273645	Tm9sf1	heart
600.315917196603	-0.300265581712664	0.209248493847324	-1.43497129270498	0.151295278218372	0.327350582938704	Irf9	heart
70.5954566959189	0.195401725442158	0.25512136685456	0.765916739359402	0.44372584506076	0.648103743599351	Gmpr2	heart
845.446957767956	-0.71260852371176	0.114413741776938	-6.22834733524465	4.71381107088134e-10	1.90281769973683e-08	Mdp1	heart
525.047349314498	-0.219334668832746	0.129250509076292	-1.69697334579379	0.0897016998648911	0.228039871987437	Dhrs1	heart
814.296088787409	-0.470668644280685	0.199374814994817	-2.36072266345637	0.0182393651684139	0.0722583909285247	Tmem161a	heart
116.967312714705	0.0580907189681198	0.266497368853719	0.217978583495907	0.827445798106217	0.909503783884736	Armc6	heart
212.460950623123	-0.468103630645462	0.198604141513391	-2.35696812301318	0.0184248284102052	0.0729084567369024	Borcs8	heart
817.167055750461	-1.41612860323947	0.24218845944272	-5.84721752018247	4.99863679490152e-09	1.67571008426625e-07	Slc25a42	heart
691.265571891395	-0.125824141273496	0.121952739279922	-1.03174510073683	0.302191543461914	0.511107154951575	Snx9	heart
641.386976284742	-0.146267177827187	0.185511961082841	-0.788451466813347	0.430432676445033	0.636896587942308	Ranbp3	heart
2510.60198885645	-0.240028233097109	0.178687011737141	-1.34328864064393	0.179178528868461	0.366798476801393	Ndufa11	heart
77.760600500421	-0.24793857782542	0.260417773823206	-0.952080091099092	0.341056365020993	0.554294280334438	Nr2f6	heart
1692.91678313022	-0.513774579613504	0.186329357274745	-2.757346384531	0.00582725862507694	0.0304158824332631	Use1	heart
208.231923549053	-0.070010233025106	0.174367431934966	-0.401509801734177	0.688044823130003	0.826744479681706	Ocel1	heart
239.103329867918	-0.737595533143452	0.315645151508075	-2.33678714727409	0.0194502544647951	0.0761236102237258	Dyrk1b	heart
592.360599482745	0.708405021140993	0.127207720672604	5.56888384915113	2.56376310718271e-08	7.36420712303176e-07	Braf	heart
428.473347022332	-0.389797913630322	0.144992276019596	-2.68840468148551	0.00717943296361178	0.0358288893034086	Ndufb2	heart
417.652801070161	-0.237072520776309	0.171423437617645	-1.38296445381694	0.16667576544259	0.348792046579556	Hltf	heart
770.971317905453	0.16820180163228	0.124505638159758	1.35095730698118	0.176709109102916	0.363038899343439	Prpf6	heart
137.445382652013	-0.0949770403948149	0.196293336381644	-0.483852596046132	0.628490484767238	0.78965296181386	Rgs19	heart
66.766906277111	-0.71808854111561	0.282404098296138	-2.54276954707152	0.0109977737980134	0.048957137259411	Abhd3	heart
334.508074514484	-0.131720037082887	0.14900143209746	-0.88401859786643	0.37668617341657	0.587842405363797	Snrpd1	heart
95.9312460209887	-0.325238988708527	0.265489570307216	-1.22505373123385	0.220554976520849	0.419232669218511	Tchp	heart
98.0358148381316	-0.0726521195366993	0.242194454068782	-0.299974331848517	0.764196734737918	0.873255543530572	Tiam1	heart
1409.43331610467	-0.120285242798459	0.125769546999616	-0.956394021192002	0.338873204206749	0.552004059001539	Tsc2	heart
2998.90991136295	-1.97717194313827	0.213812775629316	-9.24721143214596	2.30425654748314e-20	3.61370992343218e-18	Rpl3l	heart
1803.1700346386	0.197991754119078	0.167463925271547	1.18229495575258	0.237088686379927	0.438503190588006	Slc9a3r2	heart
1241.27281877102	0.0879852730088534	0.150424499741954	0.584913183422832	0.558606093597478	0.742341632516216	Puf60	heart
1516.25686696749	0.157420726313869	0.135213011074682	1.16424244281433	0.244325774528676	0.447344508708744	Golga2	heart
236.901697248716	-0.41781800618962	0.177525608086734	-2.35356470929809	0.0185943711652626	0.073387792935737	Uck1	heart
64.9905082675159	-1.35034247856847	0.338709378836373	-3.98672892734041	6.69904885764507e-05	0.000799665989621254	Scin	heart
22.0064866880579	-0.42234437241251	0.454934768158898	-0.928362486168556	0.353219570974293	0.565530978398102	Ikzf4	heart
183.52932751505	-0.51002488346221	0.20281023931856	-2.51478862791093	0.0119103767314078	0.0519197674971114	Mien1	heart
2305.21017209398	0.633591830982837	0.134797553135738	4.70032145423906	2.59752278533258e-06	4.7317224142961e-05	Axl	heart
392.432930336937	-0.146019170823104	0.176326225657826	-0.828119414898976	0.407602875338025	0.616214252754793	Tgfb1	heart
667.225397844763	-0.277187451117279	0.189535546821304	-1.46245628203249	0.1436162160644	0.315466438290781	Ccdc97	heart
90.1760122407538	-0.219152484413931	0.273822617258617	-0.800344714428569	0.423511102990856	0.630759249995333	Zfp40	heart
729.882350454851	-0.149876841882946	0.149545429806045	-1.00221612975623	0.316239219190604	0.527413263248576	Akap8l	heart
235.421639220969	-0.338237710630208	0.170732880132542	-1.98109298201747	0.0475808471755595	0.145435502305953	Pdcd2l	heart
434.739085195266	0.0929708037326914	0.166086641021137	0.55977291828582	0.575634338070118	0.753666146111572	Gtf2f1	heart
773.834319484354	-0.179094088739925	0.200819453777733	-0.891816431978478	0.372491332689895	0.584169165887462	Clpp	heart
446.228856661516	-0.466775686142125	0.182609260560424	-2.55614465941979	0.0105839108597435	0.0476275988688458	Alkbh7	heart
56.9134618465519	0.439936740363484	0.287843263748933	1.52838991134846	0.126415758171075	0.288672235060443	Dennd1c	heart
276.621047513612	0.132762400127627	0.180658107274654	0.734882049471432	0.462411331488823	0.662620075071463	Med6	heart
126.163879920705	-0.230022498822382	0.215113399947451	-1.06930808995894	0.284930866460837	0.4937884849475	Prkd1	heart
84.962677456423	0.0146979166130892	0.304726933342124	0.0482330736305068	0.961530491907205	0.982339887389214	Lcp2	heart
1159.62310856176	-0.197369903698952	0.17575024719166	-1.12301351976886	0.261431752554806	0.467432162476448	Cse1l	heart
1727.42691362748	0.342937691165163	0.124969033337209	2.74418135443043	0.00606620149705257	0.0314824089866052	Naa20	heart
332.01182970281	0.158748460974029	0.147616879593854	1.07540859426647	0.282191835718737	0.490662088256206	Prkra	heart
409.859755881477	-0.442384365474326	0.185182822133085	-2.38890605715253	0.0168986227578469	0.0681741008007284	Fkbp7	heart
622.820650478454	0.411409278000925	0.127209477062047	3.23410871188677	0.00122022998647668	0.00879958664666374	Plekha3	heart
1196.88840702741	-0.264085987103458	0.128051033664715	-2.06234951445166	0.0391744721248425	0.125882359319678	Ykt6	heart
1395.01419120624	0.459982235065668	0.114508289632095	4.01702127019406	5.89384061894514e-05	0.000722511782613545	Baz1b	heart
472.116085383375	-0.410986871341655	0.27809083881071	-1.47788712889389	0.139437991976307	0.309348286589387	Pex6	heart
922.965646655347	-0.328599767779681	0.168257926944266	-1.9529526706253	0.0508252036813231	0.152677031930421	Mrpl2	heart
724.009296029002	0.681715643509214	0.172301499254821	3.95652763590297	7.60470942276449e-05	0.000886983844958816	Mea1	heart
44.7252610817202	-1.30872078733825	0.323837923102929	-4.04128329010524	5.31594929494838e-05	0.000659371019820688	Gnmt	heart
1704.69910569127	0.0416523003535877	0.140101103967548	0.297301728352089	0.766236162234183	0.874489853410556	Kdelr1	heart
991.560458648267	-1.12775900564655	0.233370830317311	-4.83247629582991	1.34845171655771e-06	2.60598799160246e-05	Tmem143	heart
247.516864424505	-0.700925869691515	0.180763596141748	-3.87758312321844	0.000105499287821561	0.00117122236211341	Ggct	heart
472.495708378194	0.0305846070368688	0.221725973630269	0.137938765297155	0.890288812955821	0.947290069716075	Jag2	heart
324.779083101967	-0.104140854720133	0.16641957669592	-0.625772861509063	0.531463934675068	0.722096586806077	Btbd6	heart
74.2194725374453	-0.283392357574043	0.301333744208025	-0.94046008129247	0.346981616420173	0.559755477906038	Nudt14	heart
261.8802083566	-0.265934238524153	0.166019401360795	-1.60182627057076	0.109194032056061	0.261330183015768	Epdr1	heart
1620.85216524721	0.132103539252248	0.145069286567333	0.910623760398335	0.3624936468323	0.574699432649302	Flii	heart
92.7451999549353	-0.262018860580303	0.269951517205933	-0.970614513644025	0.331740275833997	0.544218386855724	Top3a	heart
727.621566629508	-0.120277286132143	0.198057078808013	-0.607285974609037	0.543661144501848	0.730737134822502	Atg4d	heart
96.3080872385542	-0.289477638068476	0.247620281707112	-1.16903848131016	0.24238812767791	0.445538624954523	Qtrt1	heart
2260.08174282668	-0.521993910747518	0.434229028377562	-1.2021165712893	0.229318366830113	0.429429014140827	Plin4	heart
557.166864200867	0.0255322677057543	0.213203099803785	0.119755612039656	0.904676745265848	0.956260420855844	Hdgfl2	heart
38.9721830228442	-0.545211894097601	0.345069384409022	-1.58000656891468	0.114105362138788	0.269678427337886	Chaf1a	heart
520.816582039544	-0.0495466639717328	0.16936046017349	-0.292551543146365	0.769864956869272	0.876578275183539	Adprh	heart
240.352385813814	0.207390445576961	0.235543290311702	0.880476982819225	0.378600968863815	0.589990136160616	Tmem39a	heart
668.426213037344	-0.167869372720023	0.133468931618423	-1.25774118878803	0.20848537103216	0.404131234980042	Timmdc1	heart
324.619418811237	0.60348422956471	0.238882210375778	2.52628368020954	0.0115276356035314	0.0506874186833973	Pla1a	heart
115.944704578875	-0.0846950104168858	0.204434276402325	-0.414289677383683	0.678661972758017	0.820601201374547	Mcm2	heart
405.085843254592	-0.101295685540835	0.189618324916849	-0.534208313385615	0.593197418054778	0.765133822266912	Tpra1	heart
705.371082604444	0.397260492497063	0.142526366349938	2.78727720821626	0.00531529890259564	0.0283621189781052	Nab1	heart
845.083657720908	0.463386680835353	0.119741378447452	3.86989599454718	0.000108881793144508	0.00120387616342274	Adgre5	heart
104.300588766538	0.646375919426081	0.233981029401335	2.76251421356639	0.00573580643284302	0.0300766114410877	Il17ra	heart
2220.9634199044	0.146005250992361	0.106992154551554	1.36463511370835	0.172367762742736	0.357160004185971	Lamb1	heart
164.15275406185	-1.23858978302995	0.36107893288522	-3.43024660323695	0.000603032922264369	0.00502000072689143	Kcnn1	heart
117.331858238883	-0.692932423750927	0.339111233115815	-2.04337797183579	0.0410150363601397	0.130445024731409	Arrdc2	heart
29322.3276687706	-0.415730526894421	0.142837287827546	-2.91051820723697	0.00360829942704359	0.0209407219832339	Cd36	heart
630.399972348663	-0.191096689255334	0.176583954798085	-1.08218603141969	0.279169874081576	0.487644829339268	Map2k7	heart
1233.73411016543	-0.134005473474011	0.119667956411484	-1.11981082900109	0.262794383632047	0.46857900813848	Timm44	heart
1068.57611792091	-0.12802989880697	0.120942778771581	-1.05859895156514	0.289782464597518	0.499090122061163	Ap2a2	heart
324.394062508198	0.00656763736904745	0.178725421596414	0.0367470800202003	0.970686669544706	0.986468171568604	Pnkp	heart
909.674262694245	0.192114268315931	0.236405146606432	0.812648417658025	0.416419663298008	0.624286329638283	Med25	heart
3924.33452329091	0.30628272053276	0.239221626236547	1.28033040052115	0.200428960313567	0.393588476470684	Bcam	heart
1748.00467046016	0.19778498438515	0.130766787574094	1.51250166846137	0.130406288509528	0.29438507617869	Clptm1	heart
140.811615065501	0.017539791266082	0.205102132742571	0.0855173519238665	0.931850101163028	0.970869524323571	Relb	heart
655.347568671616	-0.040802617978009	0.193708048623245	-0.210639765709316	0.833168379866929	0.912412663528725	Tomm40	heart
6561.6960132166	-0.0369580832568305	0.185310838918813	-0.19943832466822	0.841919883842542	0.917138115381049	Apoe	heart
918.878215140162	0.185180977515847	0.176933067563883	1.04661598911682	0.29527672451026	0.504028734570405	Hbp1	heart
54.3283227144517	0.320142028004898	0.335071396286782	0.955444217419542	0.339353102105693	0.552609493752499	Prkar2b	heart
991.546365879722	0.00202014884410785	0.138557208325942	0.0145798899134548	0.988367343073141	0.994343314326053	Cdkn1b	heart
800.01482943388	0.728555865193296	0.178943520115361	4.07142915666133	4.67255734438326e-05	0.000589208617437756	Klf4	heart
826.550626403573	-0.157465019848769	0.168379294297051	-0.935180424090462	0.349695325235983	0.562182516498144	Ap1m1	heart
679.248678058388	0.149890843058702	0.126527288482047	1.18465229799001	0.236154950214499	0.437844563218728	Rab8a	heart
1174.28588925433	0.040023594673718	0.160509454961236	0.249353501844387	0.803087349453132	0.895206192478638	Hmgn2	heart
879.869166594896	0.103651206398195	0.146202482782936	0.708956540444559	0.478351446548844	0.676895575265756	Fam32a	heart
323.446845083451	0.129774673928485	0.151619488662369	0.855923437503942	0.392040129968125	0.602975485659463	Stard3nl	heart
1369.25571854171	-0.236445404260179	0.191266622271716	-1.23620839565139	0.216381110744092	0.414221592277577	Stk11	heart
24.145286607361	-0.0699084485722785	0.443958468063523	-0.157466190198394	0.874877451759268	0.93701967449433	Efna2	heart
7032.86187551691	-0.406980143344486	0.243182447126212	-1.67355887792864	0.0942173260269425	0.236348813442104	Atp5d	heart
1105.5166098654	-0.0232298095811658	0.158925156899261	-0.14616823437142	0.883788581494925	0.943094901135363	Ppp5c	heart
380.421304502805	0.246482425579171	0.153646750547363	1.60421502375471	0.108666664238362	0.260479263328921	Cdk12	heart
577.283399031605	-0.371502682094775	0.254511630200071	-1.45966878528395	0.144381124703296	0.31682806498955	Lipe	heart
1037.33689870246	0.42400993470192	0.14046375824795	3.01864295808921	0.00253909575414769	0.0158173223096881	Pafah1b2	heart
175.408418750217	0.179372693639701	0.187005315919933	0.95918499833716	0.337465556506155	0.550565592845865	Tbc1d8	heart
360.130776390094	0.0447607211368008	0.147786139574604	0.302874960166377	0.761985154510856	0.871766390899179	Cnot11	heart
41.9188290007904	-0.136707914122489	0.329553193436812	-0.414828066743348	0.678267771682368	0.820601201374547	Slc2a3	heart
623.062034481321	-0.588941167596275	0.156017600864109	-3.77483799478009	0.000160111683771699	0.00167143367511941	Foxj2	heart
1318.57908243388	0.681918212008652	0.146217317430329	4.66373083566918	3.10527494507936e-06	5.56015372055942e-05	Sri	heart
648.14991820063	0.0884459379334458	0.153930719431359	0.574582762038515	0.565573513008948	0.747060221209261	Dgcr2	heart
503.073828321719	-0.0800726393756731	0.157822443882832	-0.507359013114253	0.61190293875888	0.778131974615293	Irf3	heart
59.857346555026	-0.375066680062626	0.298528089444338	-1.25638656235248	0.20897585122669	0.404656302613427	Bcl2l12	heart
103.486121479739	0.120835783632262	0.215704137831665	0.560192237603535	0.575348321106335	0.753519874633519	Zfp959	heart
703.445056209208	-0.52646154483078	0.200640775599709	-2.62390106526056	0.00869290318651627	0.0412973436897033	Mpnd	heart
325.77789966957	0.287808788330876	0.193908431487046	1.48425102572243	0.137742337557379	0.306433467085093	Sh3gl1	heart
89.1133343233955	0.216015125677386	0.263563805582938	0.819593286717095	0.412448001978327	0.620586678051061	Yju2	heart
1562.45410336096	0.116760527602906	0.149838523961419	0.779242377167105	0.435836951340045	0.641712942846482	Ranbp2	heart
1889.59222337751	1.10068772783588	0.114598569274975	9.60472486523652	7.6361596809559e-22	1.407942739013e-19	Grk5	heart
636.39352567598	-0.099089035074102	0.165657875058297	-0.598154691041592	0.54973672055359	0.735641173632983	Dvl3	heart
925.508333562029	-0.0652903528390602	0.13582605570322	-0.480690928563219	0.630736179372288	0.791116421341745	Abcf3	heart
935.164762535093	-0.237793728589971	0.124147321869292	-1.91541569330293	0.0554395113511853	0.16270524690806	Eif2b5	heart
700.605471000603	0.286565392403662	0.153460737528404	1.86735315507409	0.0618522869810646	0.176661629384477	Cyth2	heart
65.3026481199631	0.15659074611429	0.268080454226349	0.584118475053295	0.559140605751523	0.742477828218669	Car11	heart
86.7210981469247	-0.166590300223177	0.311578134269395	-0.534666210174879	0.592880690848463	0.765014577826407	Plag1	heart
69.8133798894729	0.346773082562078	0.283140668406854	1.22473781146758	0.220674022774206	0.419283716297349	Hck	heart
1088.41742652402	-0.315249576477364	0.191133741522192	-1.64936642775217	0.0990725882518988	0.244527205880772	Mrpl4	heart
509.008080524207	-0.548995128693303	0.175562334060525	-3.12706670044633	0.00176559865636995	0.0118610674876965	Keap1	heart
2115.66597037535	-0.0773852780661066	0.118724021777114	-0.651808091637811	0.514524981042062	0.707822024736629	Glg1	heart
553.412024082542	-0.412272062474161	0.237606172085777	-1.73510670558393	0.0827219068139331	0.215437218063199	Btbd2	heart
1577.80346351136	-0.410768218918868	0.212453575032352	-1.93344931407399	0.0531808712998405	0.15763628242777	Csnk1g2	heart
409.09975074137	-0.377041881056384	0.21840096558596	-1.72637460665431	0.084280041116805	0.21836628959318	Abhd17a	heart
42.6716557043498	0.278862685431612	0.346240226871671	0.805402329911734	0.420587547685087	0.6278589223212	Mob3a	heart
89.2368840031455	0.466572102364654	0.240364523634989	1.94110218641574	0.0522458839261815	0.155540659020035	Cacnb3	heart
24.7928180329375	-1.62376419213643	0.460693480883551	-3.52460857275919	0.000424108973420476	0.00376238155614367	Fkbp11	heart
921.513557522578	-0.245736913123847	0.138431700223562	-1.77514913655608	0.0758732655368685	0.202912553957445	Ddx23	heart
478.500341633308	0.152360932581374	0.213659788169559	0.71310064419076	0.475783480913329	0.674380824182575	Pld3	heart
91.5148307213581	-0.160232044921954	0.264946959783817	-0.604770271954412	0.545331648852929	0.731885180866622	Grik5	heart
19.6470549648399	0.187757289631354	0.664443010601716	0.282578470441463	0.777499986051345	0.880978520599609	Cd79a	heart
1588.73761037622	-0.219996917552807	0.191328682556436	-1.14983762294979	0.250210756166332	0.454698395995397	Rabac1	heart
531.149338920417	-0.191429329988222	0.138699394996463	-1.38017422493518	0.167533008017953	0.349941880189367	Etv3	heart
738.792565576154	0.178313851665602	0.178164818364879	1.00083649118884	0.316905864416013	0.528266782418091	Prkcsh	heart
135.762971642892	0.780586550396472	0.276035085530171	2.82785265828519	0.00468613692277102	0.0257190877611777	St8sia6	heart
1479.28912977407	0.0116015494235657	0.150887096958287	0.0768889431730068	0.938711893577372	0.972644982142314	Fcgrt	heart
443.028824760745	-0.219990844175046	0.188906185837639	-1.16455077000032	0.244200881146395	0.447344508708744	Nosip	heart
363.870273765219	-0.474270029967657	0.176832836452136	-2.68202467077448	0.00731780629149163	0.036293765554748	Pih1d1	heart
3829.54721455561	-0.140465394538483	0.158460790219267	-0.886436287135241	0.375382472578414	0.586680235493686	Rps11	heart
1157.28870783537	-0.0114405261131496	0.125987255512762	-0.0908070111265401	0.927645938997818	0.968459805010807	Supt5	heart
734.565369913428	0.208489808734424	0.129256649655464	1.61299097021436	0.106746469584236	0.257641753229669	Paf1	heart
584.285510672094	-0.380287735447892	0.184107537453985	-2.06557396132106	0.0388687251950303	0.125194732427052	Timm50	heart
250.189827868038	-0.0787642555114125	0.245126804930205	-0.321320450996125	0.747967559822457	0.864413805371641	Med29	heart
119.414842342336	0.811920651721822	0.204081100540763	3.97842156657544	6.93742884990791e-05	0.000822365588428701	Bicd1	heart
876.830624873186	-0.130347914669272	0.141400496015444	-0.921834918139429	0.356614690716177	0.568508200598646	Ncstn	heart
2512.2466078001	0.00478802620935839	0.129250659439463	0.0370445012050478	0.970449523242634	0.986427273718431	Pex19	heart
424.964805046901	-0.0391726633192018	0.239027637822953	-0.163883405601058	0.869822930881366	0.933927513211155	Phyhip	heart
387.823564957002	-0.880411698867948	0.213197516447779	-4.12955888763177	3.63459902849087e-05	0.000472290182330757	Crhr2	heart
170.317893503322	0.509828593089203	0.359804506005605	1.41696000072123	0.15649462238549	0.33514560160534	Inmt	heart
450.599269423109	0.138455187202218	0.151105476226493	0.916281730217948	0.359519147877488	0.57191083754698	Impdh1	heart
1921.31509700978	0.194140344913868	0.119920736344111	1.61890554404858	0.105467587841493	0.255776709653276	Dusp3	heart
307.905650042612	0.165957158812199	0.183344134021177	0.905167540255364	0.365376635367479	0.577391569719005	Prodh	heart
221.390782760068	0.178958252906534	0.173350425631816	1.03234965968084	0.301908345284859	0.510876678804549	Ess2	heart
166.398603305916	0.276009185253978	0.201578108358107	1.36924186610404	0.170923683181116	0.355283780213763	Slc25a1	heart
452.786120498081	-0.753147274629037	0.188249235960972	-4.00079857314896	6.31290782604211e-05	0.000766993004261074	Dgcr6	heart
360.408502998144	-0.0524844895288298	0.219721928612155	-0.238867781019133	0.811208109459951	0.900240851040204	Ddr1	heart
456.514387579293	0.777161949400372	0.271242718833822	2.86519008783606	0.00416758987233818	0.023466501166294	Ier3	heart
464.999311161237	0.336927392765044	0.230380292443396	1.46248357093229	0.143608743191451	0.315466438290781	Klc4	heart
350.815380452904	-0.309014461411919	0.182872129127327	-1.68978434760151	0.0910692193968942	0.230425867198718	Ercc1	heart
881.816172602615	-1.26397983760471	0.123245522430758	-10.2557870880448	1.11464166613381e-24	2.66810015661924e-22	As3mt	heart
109.05751618569	0.489772532134367	0.25335279796076	1.93316409400864	0.0532159864368782	0.15767186079148	Homer3	heart
255.727767010545	-0.366818824333843	0.209988176280648	-1.74685466025283	0.0806625522559527	0.211646127496196	Crtc1	heart
219.123051607097	0.186940970498923	0.173710748230963	1.07616236993217	0.281854645827389	0.490388266726459	Rnf215	heart
32.1206946281459	1.04221595097577	0.516795058797218	2.01669101365135	0.043727768306958	0.136595472146868	Sec14l2	heart
259.870137365059	-0.0937030794069217	0.159032682472823	-0.589206431973091	0.555722802974476	0.740457219119507	Aven	heart
1872.67654507936	-0.428685427743106	0.120915842698396	-3.54532059799962	0.000392135821465577	0.00353622019040075	Cp	heart
792.584834281021	-0.15196766122958	0.139587522634534	-1.08869086836264	0.276290230032424	0.483790224860085	Crot	heart
149.039358282429	0.130980634625392	0.214521864007898	0.610570093781067	0.541484226384809	0.729293807979767	Rps6ka1	heart
1559.66861261909	0.00211927037217847	0.12741997031096	0.0166321681523433	0.986730061629724	0.99374381669852	Snrnp200	heart
718.143115211998	-0.189508101617825	0.130558810466021	-1.45151522858847	0.146636444855787	0.320420828573408	Ciao1	heart
70.4001293805619	-0.382463206565682	0.273006213254351	-1.40093224255433	0.161234335973079	0.341968176592056	Taf6l	heart
1108.01272171474	0.136339543768117	0.111935752168351	1.21801605945402	0.223217870025008	0.422469776476795	Insig2	heart
1547.21972162631	0.14244673779776	0.127197945562191	1.11988237835267	0.262763888475084	0.46857900813848	Kpna6	heart
828.931618821473	0.706672680409866	0.172202075142521	4.10374079304792	4.06522917619241e-05	0.00052178727074289	Man1a	heart
58.795709695141	0.0235952150779772	0.285018613275632	0.0827848216886772	0.934022638234054	0.971919224837205	Itpkc	heart
75.0666632114742	-0.275436990449672	0.317320898671044	-0.868007722161434	0.385390105241742	0.596648427994817	Coq8b	heart
557.456602781274	0.00846456982883733	0.134367987202679	0.0629954351855363	0.949770139297391	0.976832789128117	Brd8	heart
32.692929654711	-0.151005353691184	0.431002636271064	-0.350358306384499	0.726069812490896	0.851292989741839	Kif20a	heart
334.716850052733	-0.0836876030454706	0.169075390853103	-0.494972110507677	0.62061980740127	0.784322681059597	Farsa	heart
1144.93262065332	-0.738747991654132	0.122766496133073	-6.01750489688462	1.77125958390713e-09	6.4965230545239e-08	Gcdh	heart
2052.83842675071	0.283032409632216	0.140447235678517	2.01522235923586	0.0438813557611411	0.136880936901008	Mast2	heart
205.56688544524	-0.466881008719116	0.284339572442622	-1.64198393037019	0.100593334411821	0.247118374993677	Dnase2a	heart
906.302065072317	-0.544370130337395	0.198739698712629	-2.73911117840898	0.00616055367134377	0.0318268058658896	Rad23a	heart
5822.27331592665	-0.480801446305925	0.110300500490591	-4.3590141854972	1.30649644860215e-05	0.000194181236870672	Calr	heart
24.4797224413594	-0.426856352145898	0.473939495513723	-0.900655792957729	0.3677713600226	0.580015021832745	Syce2	heart
1265.60768854111	0.381869858886979	0.140327680159807	2.72127251339224	0.00650311271482342	0.0331432622768257	Nfat5	heart
338.337894059419	-0.282190606540844	0.181248245548521	-1.55692876191345	0.119487399843879	0.277968641682845	Nob1	heart
804.187224547947	-0.850367184485891	0.15764499566497	-5.39419079494986	6.88330476989195e-08	1.82360796660982e-06	Nqo1	heart
1339.82237307905	0.236240213761777	0.165854113969012	1.42438561280377	0.154334876667495	0.331665625649914	Gys1	heart
333.695946553101	-0.114539254355952	0.236469424525652	-0.484372364781251	0.628121627350676	0.789610761000369	Ruvbl2	heart
215.05389827303	0.312300637850083	0.180683875462179	1.72843668009244	0.0839099640955921	0.217572700516963	Bax	heart
744.836783178444	-0.323926654976148	0.128674359151799	-2.51741416946951	0.011821976948307	0.0516634484955887	Tfam	heart
150.472772287562	-0.293171948767818	0.202534120280461	-1.44751880997555	0.147751672109128	0.322084009307708	Zfp81	heart
1239.52937771974	0.0720386094630259	0.261986033534085	0.274971182590363	0.783338378171894	0.884098670839385	Efnb3	heart
1747.517225533	2.23381470720613	0.13132549622144	17.0097564561226	6.95261871885831e-65	8.62377543637298e-62	Mmd	heart
917.227095458945	1.36205321307219	0.186154460903453	7.31679061818778	2.53971653175069e-13	1.75897930757393e-11	Hlf	heart
2051.30195651633	0.438157723575264	0.159180696640078	2.75258076402304	0.00591275600789128	0.0307679797756173	Fam162a	heart
6458.51632972366	-0.411604705660454	0.191009798406464	-2.15488791200423	0.0311706065373344	0.107318765882604	Rpl8	heart
629.564433955338	0.220055170595831	0.131342472651912	1.67543039317547	0.0938498175288174	0.235686896808979	Ssbp2	heart
126.604428659126	-0.177069525594431	0.211646710399769	-0.836627818405365	0.402801803824772	0.612143886320471	Fancl	heart
1037.62140221072	-0.361805678981334	0.141286234955694	-2.56079921086999	0.0104431693197737	0.0472749177833421	Gstm5	heart
748.448897203683	-0.549257836012604	0.165341371149899	-3.32196250818947	0.000893867036482934	0.00681717263598276	Gstm7	heart
1752.76729331911	0.495187630751014	0.122766641384371	4.03356828179917	5.49362075817851e-05	0.000679555409107775	Stat3	heart
261.380240696599	-0.788765735592482	0.279348679369037	-2.82358856098429	0.00474893040248514	0.0259801148402194	Stat5a	heart
4813.19722875701	0.190610929909699	0.099192260931637	1.92163106395032	0.0546521969791625	0.161057168426475	Cavin1	heart
539.674150139796	-0.0321027618699575	0.224623976434769	-0.142917788116355	0.886355109902197	0.944851620389684	Map3k11	heart
3339.38423621651	-0.0968769628116089	0.136180872624098	-0.711384506097417	0.476845997588289	0.675395701348968	Akt2	heart
1947.15102927554	-0.369922020043946	0.104023564608731	-3.55613674108702	0.000376348246856341	0.00342098299807323	Dnaja3	heart
995.019510653922	0.302793698842175	0.134443504340419	2.25220028537403	0.0243096180036034	0.0894499536249098	Hmox2	heart
1625.46321866217	0.080245857941097	0.129244961066827	0.620881907338772	0.534677326218958	0.724484584324068	Cdip1	heart
2932.10209990057	0.0261270996641878	0.10391064818852	0.251438135741263	0.801475386445973	0.894517303105015	Map3k20	heart
1200.61708234851	-0.151235776589588	0.135355943255257	-1.11731906965019	0.263857924696013	0.469861331839259	Cwc15	heart
523.023674335843	-0.225108225625538	0.217707708097919	-1.03399290540641	0.301139479923559	0.510339965728112	Col5a3	heart
339.562542847308	-0.00734607405520818	0.142689139917976	-0.0514830635283878	0.9589405972996	0.981234851474107	Dnmt1	heart
112.13118032452	-0.11799214001111	0.250395494871808	-0.471223094774598	0.637481428043187	0.795987215052612	Ppan	heart
2434.48116510821	0.433096192037048	0.125248108859475	3.45790603930772	0.000544391212809826	0.00461632921539917	Angptl2	heart
55.9217751905259	0.0381178201888096	0.307361999545862	0.124016047023152	0.901302569461315	0.953723892566242	Trmt10a	heart
228.498321251925	0.0249696053277089	0.213373860452626	0.117022794051442	0.906841990540279	0.957477519872414	Etv1	heart
109.010719585575	-0.563358115734518	0.249412059220716	-2.25874449493228	0.023899282966368	0.088393010786968	Kifc2	heart
15104.1188555979	-0.472933618427181	0.150078728122076	-3.15123684978522	0.00162580591924881	0.0110810826525735	Psap	heart
732.586097341437	-0.171076671050307	0.146556825819763	-1.1673060609316	0.24308679188607	0.446449884034666	Ikbkg	heart
183.734612529312	0.612676909605224	0.182461203198034	3.35784758001545	0.000785519148714748	0.00617019186244331	Wars2	heart
58.2425418742967	-0.147888256195796	0.289530985076234	-0.510785594007691	0.609501197689946	0.776618821561601	Atn1	heart
1857.69883724006	-0.256054901785398	0.161908338568094	-1.58148063311581	0.113768183712706	0.268974718172962	Phb2	heart
132.183288112625	0.10379290355915	0.248256919554332	0.418086648885669	0.675883766098751	0.819056586255561	Ptpn6	heart
24.8190625927262	0.0261378778433982	0.427724101572281	0.061109200410539	0.951272241978766	0.977935388001679	Eno2	heart
1231.08816416184	0.0236376713348224	0.120331352949133	0.196438174719224	0.844267219171153	0.918894526902779	Emg1	heart
463.307720029932	-0.428367617953846	0.158336797726601	-2.70542049671553	0.00682179755038265	0.0344619348367929	Lpcat3	heart
1023.24117293582	-0.0700160185312988	0.141230520428932	-0.495756995857925	0.62006586912593	0.783959950936317	Atp6v1f	heart
106.463392350595	0.790144797167185	0.241552590437217	3.27110877071118	0.0010712669872001	0.00788570553514418	Clcn5	heart
1330.79149987115	0.857075347814326	0.140059550745404	6.1193638224093	9.39496787440769e-10	3.62104355023781e-08	Clcn3	heart
33.5643433307054	0.812310405452692	0.391256303444245	2.07615928050716	0.0378792219375595	0.123229400123048	Hif3a	heart
830.242489632464	-0.773473386642606	0.214634497770958	-3.60367692367887	0.000313747007967949	0.00292433387251157	Pde1c	heart
237.783866962644	-0.443685333074792	0.212038202744085	-2.09247827671078	0.0363957530151879	0.119453781880136	Utp20	heart
2111.12145800132	-0.0275727567963657	0.113631450168482	-0.242650751666757	0.808275961753671	0.899004846261458	Cul3	heart
769.828676101528	-0.322154463705549	0.134839172072777	-2.38917562866429	0.0168862278678338	0.0681442452022253	Large1	heart
328.389409725113	-0.439005012387642	0.181119619767509	-2.42384018336149	0.0153573622331272	0.063094203646127	Ddx56	heart
1861.63109986232	0.367609159514609	0.146179415010736	2.51478061728193	0.0119106473369949	0.0519197674971114	Tmed4	heart
34.1784354776951	-0.248267440456199	0.37250891289059	-0.666473826168874	0.505108288037869	0.700981668506276	Bid	heart
643.719554775712	0.176482305117733	0.140325587689412	1.25766303939057	0.208513644495978	0.404131234980042	Ralb	heart
1118.81146632152	0.3973787339842	0.121282420350446	3.27647430547619	0.00105111876384877	0.00776473438763004	Ppp1cc	heart
928.093975162763	-0.0357611116411496	0.140936047996509	-0.253739991645255	0.79969643603176	0.893703821834369	Dnajb11	heart
200.472399430002	-0.389350630052968	0.177254706877243	-2.19656017553661	0.0280518730698816	0.0992839834411064	Tbccd1	heart
23.8886155131536	0.049497593295976	0.430312682341893	0.115027038075185	0.908423690997547	0.958307447786994	Clec11a	heart
103.532199270068	0.0100558177346856	0.224048646112077	0.0448822963636895	0.964201128078416	0.983446227966054	Zfp324	heart
754.004615867239	0.15783854240574	0.121205434122336	1.30223981745265	0.192834417635686	0.383588393967241	Gab2	heart
737.38425752423	0.511684240228377	0.126565007847459	4.04285709716131	5.28038054184126e-05	0.000656750338312508	Coro1c	heart
1905.1044743354	0.213296479359394	0.114960767423722	1.85538496427417	0.0635412729534506	0.180315542466073	Tax1bp1	heart
20439.5186257472	-0.265720332201415	0.122809134113151	-2.16368541412067	0.0304885011850362	0.105687273924958	Ndrg2	heart
244.525552802025	-0.477132963112012	0.156715501958585	-3.04458051149338	0.00233005055210976	0.0148210767985947	Mettl17	heart
591.666913546308	0.299793375340229	0.139102387752064	2.15519934765304	0.0311462379506754	0.107312947120964	Arhgef40	heart
274.132684040966	0.278002854592732	0.16404295255552	1.69469550664569	0.0901331985152855	0.22888095301369	Pnpla6	heart
399.354011524036	0.107984423919501	0.169434255073764	0.637323449573343	0.523914179621315	0.715839090918102	Mcoln1	heart
355.117479186597	0.0242624226056598	0.142619589926012	0.170119845515238	0.864915886539446	0.931552917267461	Arhgef18	heart
908.901973326924	0.568745303676348	0.144814873515395	3.92739564569578	8.58706590544716e-05	0.000981255671808384	Pkn2	heart
234.831223797374	0.24467851878599	0.240687422707055	1.01658207160992	0.309352286565275	0.519675276766389	Cd33	heart
569.865692689312	-0.828302000956883	0.204064209619153	-4.05902633540077	4.9277756500114e-05	0.000617397345902254	Etfb	heart
77.2655543798954	0.0177471759385733	0.251682610563257	0.0705141125914725	0.94378446828675	0.974570141928738	Stxbp2	heart
469.631250541172	0.0819834641954212	0.137975797419623	0.594187283049989	0.552386857414628	0.73766920647599	Sgce	heart
65.8326475737937	0.247933150779734	0.283622544624539	0.87416587813197	0.382027925363767	0.593530973999458	Chn2	heart
79.7944778491655	-0.206314842616983	0.243346318061644	-0.847823974738421	0.396536009088528	0.607229678192999	Wwox	heart
232.883355755743	-0.0224206322936354	0.184755659044484	-0.121352885262568	0.90341153311175	0.955293106857066	Slbp	heart
9448.71689064839	0.377435336390702	0.160951205469577	2.34502957147497	0.0190255705621104	0.074769641370776	Aqp1	heart
77.2790150047805	-0.639116357011826	0.327365573773738	-1.95230167193316	0.0509023990832886	0.152707197249866	Arid3b	heart
1187.80274686792	0.699049009016752	0.164202022002912	4.25724970064228	2.06957161936465e-05	0.000290805717555214	Cnn2	heart
1098.65805129494	-1.09508598013741	0.212701984677565	-5.1484521021158	2.62644832928986e-07	6.17849327669498e-06	Polr2e	heart
607.076736182925	0.250441060260386	0.126451285619313	1.98053391892234	0.047643565901404	0.145522456494013	Myo9b	heart
533.930828360425	-0.626325822440489	0.16299890652163	-3.8425154855709	0.000121779727820547	0.00132556225392205	Hdac9	heart
43.8447633739357	-0.208119500074164	0.336450178820481	-0.618574496835713	0.536196707028755	0.725492648819946	Ly9	heart
429.253389401511	0.0991417156173155	0.192020044177161	0.516309201167799	0.605638470868551	0.773746851660805	Adgre1	heart
1520.57026695649	-0.779790979711836	0.163970115758596	-4.75568963346881	1.97770113212282e-06	3.69134805016193e-05	Mtfp1	heart
193.989221024697	0.128542250067482	0.193094517923382	0.66569600965309	0.505605424584396	0.701145783897275	Rab23	heart
1468.10312910055	0.0838918618687473	0.112711871408145	0.744303690646419	0.456692768998356	0.658123800191547	Rab11a	heart
383.121949921753	-0.0357774971610123	0.206476007193271	-0.173276777516929	0.862433876430462	0.929836944763612	Eif2b2	heart
8046.66553069683	-0.239662122529965	0.107134398381415	-2.23702308642955	0.0252848311961514	0.0920208687224033	Dlst	heart
99.1998910931844	0.559111384146298	0.253549677937537	2.20513545390516	0.0274445908610805	0.0977942015431138	Pgf	heart
1483.34025830867	-0.0436532086081014	0.104166072300965	-0.41907319383201	0.675162640787302	0.818890261918881	Ulk2	heart
47.4460370550293	-0.27954221909043	0.335068479166156	-0.834283844860885	0.404121053226854	0.613241331666281	Ccl24	heart
88.7597090188117	0.292312052384782	0.237524459885575	1.23066084446882	0.218449738436579	0.416565790528117	Dgkq	heart
360.57007208566	0.14596053697804	0.157485848411788	0.926816843862622	0.354021637997995	0.566335001623243	Grap	heart
877.616720984715	-0.205649441875844	0.14399337511604	-1.42818682949905	0.153238090457568	0.330244906997797	Chmp2b	heart
486.910460779561	0.353001484649723	0.162614772195246	2.17078362490884	0.0299475323306346	0.10434221938692	Plod3	heart
538.369168197347	0.0572143856704847	0.145755621741005	0.392536390617917	0.694661928612093	0.831036155544358	Ap1s1	heart
592.987488850875	0.0166497020038257	0.122554944109655	0.135855000585929	0.891935909893493	0.948155321744201	Srpk1	heart
364.245631820325	-0.00408221050742209	0.15621902243196	-0.0261313279514348	0.97915258949746	0.99074670029803	Lbr	heart
968.554720829687	0.512579141180393	0.175064559494305	2.92794351215939	0.00341212030348644	0.0199892526495359	Nes	heart
575.122456363924	0.0409658320550675	0.201719869777752	0.203082780591729	0.839070330388755	0.915862047025934	Prcc	heart
209.119998590204	-0.19798887168017	0.228957248048773	-0.864741664076928	0.387180596021772	0.598122641935868	Rrnad1	heart
2386.91923334752	-0.225750037498968	0.119655799726526	-1.88666189198452	0.0592058163802979	0.171395128975691	Hdgf	heart
178.586608760642	-0.570162826369128	0.259078572445075	-2.20073324083952	0.0277549141284178	0.0985653431463125	Thop1	heart
632.558609716789	-0.518205164376745	0.272065260618697	-1.90470905105013	0.0568179018095597	0.165823198350724	Apba3	heart
191.503394253779	0.0728449049862898	0.234357220949393	0.310828506547361	0.755930997281126	0.867873454876861	Pias4	heart
684.784717817308	-0.201514220542196	0.133003125491951	-1.51510891038715	0.129744825545446	0.293815502031878	Map2k1	heart
1441.83218142937	0.163113085229073	0.201447274883645	0.809706089711497	0.418109117200539	0.625793376494716	Sgta	heart
258.140876523725	1.12166079909526	0.192752852901029	5.81916574625844	5.91420660070483e-09	1.93974603028886e-07	Nmrk2	heart
2495.5661523805	-0.373376899345391	0.173602768338797	-2.15075429336889	0.0314955984734825	0.108107156118791	Tmem242	heart
153.388644810741	-0.176240986273329	0.274408568572407	-0.642257591263317	0.520705944986288	0.71351932443436	Dtx2	heart
1735.79419722413	0.20563638487554	0.264011686331468	0.778891221570253	0.436043795472746	0.641712942846482	Hspb1	heart
242.837549533108	-0.0725857284671002	0.270936350409576	-0.267906939609145	0.788770951869559	0.887877577913844	Rasa4	heart
7540.52661828139	-0.0880402476081848	0.0970413798005296	-0.907244391919748	0.36427757334097	0.576255444714689	Hnrnpa2b1	heart
120.932621806551	0.0762955560674594	0.216564743432883	0.352299062433053	0.724613991202946	0.850509181251382	Ccdc130	heart
106.755386250219	-1.29551841771575	0.32813230820786	-3.94815867048084	7.87546022574547e-05	0.000915270692675224	Mri1	heart
1194.13086955223	0.13236446157293	0.118163098120566	1.12018442033294	0.262635181635639	0.468417571011327	Prkacb	heart
103.39858644691	0.101195841875361	0.2209178333409	0.458070045070578	0.646902118908053	0.802881534121306	Sgsh	heart
259.716083816369	-0.533483956442979	0.16205674891746	-3.29195766302023	0.000994925881499856	0.00744226763856136	Cstb	heart
384.527494726294	-0.0538141494640384	0.160830424490718	-0.334601799593858	0.737925487212473	0.858561351375958	Pex5	heart
420.665266939932	0.0389186366047057	0.133272534648112	0.292022934113657	0.770269088972128	0.8768311150092	Jkamp	heart
221.935191118428	0.41310939734801	0.226595865192466	1.82311092480493	0.0682865922915837	0.18975606216423	Cd44	heart
153.572200288111	-0.227507375057926	0.199549452462016	-1.1401052333192	0.254242461915013	0.459211563458887	Eif2ak4	heart
2232.19892927127	0.354397201012772	0.115985373053255	3.05553357016879	0.00224660451159396	0.0143706853990567	Wdr1	heart
66.2953276733903	0.163319513237274	0.260693854640936	0.626480104267206	0.531000082729228	0.721753848252399	Slc2a9	heart
75.9330278184323	1.14048272094066	0.273635310909767	4.16789308787981	3.0742805777021e-05	0.000406055026158445	Ccn4	heart
844.54046933595	0.120811545159349	0.121552760030393	0.993902114021443	0.320270525074677	0.531602316802786	Ndrg1	heart
812.553393302357	0.113860396814441	0.126078824823395	0.903088976074541	0.366478674277387	0.578596971978785	Man2b1	heart
295.04040927368	-0.499788524972704	0.23391056204399	-2.13666505952267	0.0326252438369216	0.110951851174217	Wdr83	heart
4622.62216168747	-0.342879804798081	0.124559908026088	-2.75273007367883	0.00591006026154815	0.0307656856957509	Prdx2	heart
880.044937848407	0.385468305432392	0.125545134743462	3.07035637995894	0.00213803486264393	0.0138384002210217	Polr2a	heart
763.144969412583	0.18428629031073	0.130113340072837	1.41635200670098	0.156672468134007	0.335421176089816	Senp3	heart
3032.9838629801	0.666904927291405	0.169910601698417	3.92503422755884	8.67174069737303e-05	0.000988526191469974	Corin	heart
316.267835351166	0.427662303628889	0.153877863822336	2.77923213258705	0.00544875719615217	0.0289150532756886	Plekha8	heart
18.4892200682919	0.582403299347419	0.512516615417728	1.13635984049557	0.255805995956621	0.460876404176963	Spc25	heart
17.0695705673278	0.24070369549481	0.513610410482261	0.468650343883798	0.639319585861425	0.797046457373289	Dnah2	heart
764.036563028297	-0.146092835862932	0.120295546335848	-1.21444924864518	0.224576218808994	0.424252677361745	Ufd1	heart
72.6994890422347	-0.148317505376965	0.283380418164824	-0.523386571088684	0.600705267386508	0.770532434571512	Zfp287	heart
67.46342823204	-1.47038985060411	0.357825314683418	-4.10923931389544	3.96964541578594e-05	0.000510479189943293	Prlr	heart
1317.36044351301	0.155417880119286	0.164254872262283	0.94619951285898	0.344046834585011	0.556973779197661	Letm1	heart
1085.88778344214	0.0840126019711169	0.125106246575183	0.671530033639283	0.501882933242448	0.698308022581569	Ubqln1	heart
50.3366518032561	0.523197074879862	0.333336865086564	1.56957459458915	0.116514112796868	0.273617651463075	Cadm3	heart
4116.95566901574	-0.427668103980978	0.169150422341135	-2.52833009851122	0.0114606541408284	0.0505068362717903	Txn2	heart
74.6768373394542	0.528320057490339	0.271094265254813	1.94884261750705	0.0513142225353957	0.153470243812569	Slc1a3	heart
724.474038840468	-0.26265428851496	0.165946972343572	-1.58276035293472	0.113476096461196	0.268423692808003	Crbn	heart
177.8151801825	-0.0775095076178382	0.199716741372069	-0.388097197487511	0.697944105816529	0.832990673527005	Msh6	heart
755.848545690848	-0.0797451761135426	0.128946188530522	-0.618437636833809	0.536286894659745	0.725542725903575	Fbxo11	heart
245.471078482229	-0.0588420767122965	0.208755818239364	-0.281870355559752	0.778042921080602	0.881066389426657	Mlxipl	heart
235.594582367904	0.394866228557988	0.180316952697316	2.18984528438	0.0285354592774826	0.100734231922891	Tbl2	heart
277.878581278954	0.027046519667307	0.19814460724826	0.136498893625804	0.891426899123678	0.948032195220129	Bud23	heart
3300.42111559138	0.555885340326574	0.142328259615756	3.90565683742147	9.39697871546174e-05	0.00106158007420213	Nid1	heart
87.1040682173854	0.0797438279911112	0.239353089551184	0.333163980212834	0.739010506025296	0.859030342625074	Mcm5	heart
224.097272875647	0.341878486771225	0.181440872111314	1.88424186233785	0.0595322674094021	0.172045387952869	Hmox1	heart
3324.25775792442	0.115599041891446	0.109907952253009	1.05178050834153	0.292900263782344	0.502058983780453	Mprip	heart
818.37547307133	0.159590491644451	0.198924214766765	0.802267797470348	0.422398065914957	0.629720193547167	Cic	heart
47.2638179254986	0.594637158808159	0.319285577490497	1.86239905817812	0.0625468618115327	0.178123436142048	Pafah1b3	heart
91.1602570904996	0.40505541661139	0.232789649733495	1.74000612602455	0.0818579422815803	0.213941148232221	Il27ra	heart
4787.89668455342	0.130646436894458	0.132322083018389	0.987336610143158	0.32347764883475	0.535170701916158	Prkaca	heart
38.4611675159913	-0.480744600078613	0.330958092838016	-1.45258451290964	0.146339148601286	0.319873653238698	Asf1b	heart
355.258211075759	0.0486176429278129	0.14050352959498	0.3460243530391	0.729324412870338	0.853210082940971	Ddx39	heart
503.705537710441	-0.321236504181845	0.302723486056045	-1.06115487888631	0.288619521151444	0.498156198177142	Dnajb1	heart
589.831156722907	0.267807554187167	0.128224478989571	2.08858367994576	0.0367452155356511	0.120334878860461	Usp40	heart
96.3347308967877	-0.0979857795661913	0.223258251819932	-0.438889845134241	0.660741355168287	0.811299050568405	Kbtbd4	heart
2007.05109962985	0.362707187248773	0.117320520636071	3.09159203592263	0.00199086254837418	0.0130243996999351	Celf1	heart
5009.52434654948	-0.283264481239608	0.128670742590009	-2.20146768051374	0.0277029322599097	0.0984063545311659	Ndufs3	heart
629.616016246933	0.415005164867479	0.187030634820436	2.2189154480811	0.0264924773397866	0.0952974850577507	Por	heart
523.601848812525	0.651489485972262	0.137940359240701	4.72297947865596	2.32414309255777e-06	4.27943432589179e-05	Igf1r	heart
1909.02610464713	-0.0547380308607497	0.129836005329975	-0.421593615127286	0.673321667463318	0.818058845135308	Insr	heart
886.460213005986	-0.215172340661134	0.16311042271584	-1.31918204292802	0.187108260107889	0.376541046518911	Trim28	heart
2276.02566607452	0.047355290737326	0.169706890197074	0.279041650473556	0.780212861250269	0.881738116366991	Ube2m	heart
248.374714431429	-0.494181521184659	0.188201740776866	-2.62580738703456	0.00864437180760901	0.041160215489182	Adcy9	heart
1090.27354022202	-0.26407221259357	0.146951618080498	-1.79700105410827	0.0723354524157382	0.197330880881254	Mef2c	heart
405.861309601841	0.420375798699601	0.140900476456792	2.98349451521204	0.00284977143358912	0.0173272198929991	Ctr9	heart
24107.2902215795	0.668829797204405	0.0980430182207379	6.8217993421885	8.99071913790412e-12	4.81056360461034e-10	Eif4g2	heart
293.716357907257	0.0854319250384003	0.149055262263713	0.573156047904243	0.566539040731423	0.747351703735815	Mrvi1	heart
1658.9765834	0.220229069385997	0.108904810096775	2.02221618301613	0.0431540231473043	0.135229898834822	Pcyt1a	heart
639.456760451	-0.0643516360494047	0.173486697357718	-0.370931241585146	0.710688745049379	0.84252647818696	Zfp592	heart
1658.06445125759	-0.187358321911296	0.155309377041948	-1.20635550460479	0.227680444727469	0.427653082029404	Psmd4	heart
245.069633261817	-1.79252597591195	0.262824660503764	-6.82023510456044	9.08916384001574e-12	4.84424029035839e-10	Tmod4	heart
796.825716280241	0.350365043761823	0.134165783062414	2.61143367380663	0.00901634756118121	0.0424057380643766	Snx6	heart
40.8524775365828	0.0376482504718851	0.369354881667057	0.101929749248101	0.918812436449548	0.964328990993664	Mthfd2	heart
95.6036018231881	0.472780302050784	0.30183336460634	1.56636196487886	0.117263902009037	0.27474735319246	Kit	heart
354.816618490306	-0.639692407518169	0.193390632240863	-3.30777349505454	0.000940408365837796	0.00709860650017436	Tomm40l	heart
40.9327014616812	-1.57807331227432	0.458321775645632	-3.4431558702427	0.000574967824744506	0.0048335557614381	Apoa2	heart
362.917943503363	0.0712688385632155	0.149935862006504	0.475328834672813	0.634552609826232	0.793859876074556	Pan2	heart
17409.5810091697	-0.535387668155636	0.117172544128965	-4.56922457505375	4.89532017761765e-06	8.23572731238166e-05	Cs	heart
888.686439240937	1.10159717716704	0.126841731520737	8.68481661326853	3.79353895282165e-18	4.74853628186226e-16	Ampd3	heart
743.787597333292	-0.383632619960287	0.129284321865825	-2.96735609100718	0.00300372858165281	0.0180700497213717	Bcas2	heart
835.981491905071	-0.0769397547954915	0.115663546275342	-0.665203145443363	0.505920568929102	0.701145783897275	Ctcf	heart
88.6894324693014	-0.168550514918266	0.293617067428931	-0.574048764924275	0.565934802581275	0.747060221209261	Pard6a	heart
33.9493670204938	0.172607154463769	0.382975082438865	0.450700743673898	0.652205246297577	0.805529861544685	Pvalb	heart
51.6778171641562	0.0545923870330059	0.355299723804882	0.153651645006586	0.87788441358615	0.939071339785921	Tfap4	heart
225.026014334057	0.280066126457203	0.176269641954387	1.58885060043224	0.112094126202926	0.266128714947245	Ranbp1	heart
28.4034429383164	0.017672146013494	0.486462850983957	0.0363278428717609	0.971020949186493	0.986468171568604	Cd247	heart
105.011310600003	-0.178471279308597	0.246706940736294	-0.723414099238358	0.469425511613769	0.668494069560407	Rfx5	heart
1961.58489161122	-0.155322885071788	0.113974328811043	-1.36278832867089	0.172949230503551	0.357750045632269	Psmb4	heart
503.050977867415	0.817403889807543	0.177911923201491	4.59443007021968	4.3393361274956e-06	7.33654301407063e-05	Slc30a4	heart
908.014051274319	-0.171614567274269	0.11386005323766	-1.50724123513326	0.131748834262866	0.296288296469843	Sqor	heart
632.318698543612	-0.142802190483967	0.138298503204093	-1.03256497485897	0.301807526218217	0.510876678804549	Bloc1s6	heart
683.33648029732	-0.33868410650872	0.116864499233373	-2.89809230973029	0.00375440070184231	0.0216139422683276	Metap1	heart
577.292662640671	0.147433217088553	0.159882170092912	0.922136702315683	0.356457274738102	0.568498311692187	Gpr108	heart
799.194492456302	-0.123169404254908	0.168957358000686	-0.728996983099179	0.466003507925189	0.664800487466674	Gata6	heart
1018.02391604061	-0.204122374650278	0.129578433544607	-1.57528046192971	0.115191721769373	0.271333539091728	Rsl1d1	heart
1226.36628232815	0.666370081415245	0.144526817819292	4.61070195462571	4.01311558958192e-06	6.82243451704325e-05	Apc	heart
6332.83529147559	0.028475141374523	0.0975610492733495	0.291869978711898	0.770386038056864	0.876836304604235	Reep5	heart
1020.65023424266	0.193015172771802	0.133230260110542	1.44873373820373	0.147411954692473	0.321552367294532	Ergic3	heart
2257.58037555366	-0.709638365559645	0.112751660890902	-6.2938174032424	3.09752172394669e-10	1.30038727389319e-08	Uqcc1	heart
804.250853873675	-0.175058911600561	0.125473003399628	-1.39519184890317	0.16295799436567	0.344339302326963	Ncoa2	heart
348.086848591611	0.256477065159611	0.173275751244784	1.48016709387853	0.138828659735308	0.308447847814451	Nr2c2	heart
182.075580216909	-0.181140485624282	0.174461002558308	-1.03828639620331	0.299136740162775	0.508067535909646	Nr2c1	heart
336.954434164055	-0.363518323515305	0.168470244518393	-2.15775981423008	0.0309465107716302	0.1068406358725	Smpd4	heart
136.901538479897	0.00785588236650476	0.217577622578028	0.036106113640834	0.971197747527639	0.986468171568604	Pex1	heart
1158.07197578881	0.677293908011015	0.113278334751459	5.97902422821672	2.24478172539148e-09	7.99681510737373e-08	Kctd20	heart
19.5990879732854	0.616380638683837	0.479296036490529	1.28601238432318	0.198438739610645	0.391267651912258	Itgae	heart
244.875946082963	0.419560816196545	0.160309749895754	2.61718838978525	0.00886573953921388	0.0419431866411353	Ctns	heart
190.932755325827	-0.0346831509668185	0.218201142263363	-0.158950363903031	0.873707980398918	0.936586398850003	P2rx5	heart
41.582206031957	-0.155241732015049	0.339473981715704	-0.457300825325276	0.647454836580108	0.802993999316939	Shpk	heart
108.76103807615	-0.622876375829182	0.236113095836109	-2.63804247546495	0.00833861366750205	0.0400464783102422	Ephb3	heart
50.8397089689016	1.55106446361521	0.384011677325764	4.03910754593905	5.3654961296691e-05	0.000664912163426024	Tuft1	heart
699.834863728659	0.0966264593400736	0.156618740985823	0.616953365426556	0.537265485893154	0.726344034125471	Rcn1	heart
39.9154875471793	-0.534055065011523	0.400027238235453	-1.3350467517344	0.181861045479441	0.369817114885336	Dnase1	heart
2580.94150896488	0.119377261444925	0.125271371028005	0.952949268977322	0.34061577519893	0.554009439237824	Trap1	heart
519.620742513006	0.249799751383514	0.143573191476422	1.73987740200465	0.0818805474983385	0.213941148232221	Naa60	heart
29.3989973591976	-0.843898293955929	0.394091464916746	-2.1413767337849	0.0322436696282474	0.110148379671459	1700037C18Rik	heart
17.7724650502921	0.375279780178384	0.528238498667522	0.710436253936479	0.477433648041646	0.675877224930506	Ankrd13d	heart
1675.7817813356	0.173985730136967	0.13930920051389	1.24891772758125	0.211695166936135	0.408250015219311	Tpr	heart
685.370173948192	0.076088900726214	0.15510077488519	0.490577179788671	0.623725529908774	0.786415177385819	Odr4	heart
100.579420348324	0.448116085767052	0.35134919714955	1.27541514084153	0.202162342397397	0.395512331469758	Prg4	heart
123.448082784427	-0.340534774416156	0.316511574859753	-1.07589990845374	0.281972022884574	0.490529935004097	Dhx34	heart
260.955629848546	-0.661947153308653	0.176864024561944	-3.74268964504319	0.000182061034753284	0.00185514619729186	Kptn	heart
1774.03871465569	-0.143319279105242	0.150529242137018	-0.952102575357334	0.341044963062655	0.554294280334438	Napa	heart
796.145372949033	-0.304690316251643	0.14266208674446	-2.13574834915609	0.0326999311921515	0.11106742872435	Sra1	heart
19236.7318418363	-0.544654511959435	0.160136226772243	-3.4011948635088	0.000670919837930756	0.00545259947450917	Atp5g1	heart
610.688167825705	0.22160804416487	0.177499569924589	1.24849904852739	0.211848356629202	0.408429981326669	Snf8	heart
679.833266975342	-0.116935277572492	0.179815612870166	-0.650306587431445	0.515494202813905	0.708726612574861	Tbcb	heart
729.978352439251	0.0460333191737184	0.124139009153644	0.370820739488456	0.710771053076852	0.842550846931414	Inpp5k	heart
659.906640132009	-0.0833247550012226	0.146193023680101	-0.56996396205303	0.568702141031722	0.749191079679137	Crkl	heart
176.463557043802	0.0519366374952348	0.269455700818096	0.192746478688518	0.847157521172978	0.920565245212178	Eps8l1	heart
827.140274892821	-0.185206890327892	0.117810789157716	-1.57207070466145	0.115934154639753	0.272631093744361	Clint1	heart
297.29753852595	-0.270636468951792	0.181227654189259	-1.4933508363418	0.135345374985388	0.302382887882861	Cdkal1	heart
1578.3843226338	0.513735222155308	0.110568550431834	4.64630512156374	3.37933066621321e-06	5.9340524594354e-05	Htra1	heart
327.692519372771	-0.437037204429492	0.225085005889729	-1.94165401067898	0.0521789996534268	0.155375441132989	Zbtb17	heart
17.4637176071629	-0.714685931375746	0.515455832189058	-1.38651245508386	0.165590479757564	0.347908300864213	Clcnkb	heart
3006.07491299136	-0.727350169154622	0.144611244305026	-5.02969304116099	4.91265677501847e-07	1.08635800710457e-05	Fblim1	heart
38368.8512229504	0.391850002880918	0.191946174455941	2.041457736741	0.0412053506174322	0.13086001397316	Hspb7	heart
19.7475269951035	-0.277762192045191	0.477790623669954	-0.581347097001767	0.561006544681407	0.743770115275883	Epor	heart
52.0575105329184	-1.19450433813554	0.33072668067291	-3.61175680082764	0.000304129715280234	0.00285781393614567	Ccdc159	heart
757.57405122252	0.746259965886867	0.17739081241286	4.20686931716631	2.58932772551199e-05	0.000351180790128088	Mob1b	heart
1766.16905932277	0.64581004578766	0.118377295387233	5.45552289968358	4.88289380235297e-08	1.35136314481347e-06	Atp6v1b2	heart
688.904898894015	-0.0607171664402901	0.143718552346448	-0.422472711066036	0.672680015102755	0.817789015954912	Eps15l1	heart
287.866733612323	-0.0522142504360125	0.165097334367259	-0.316263437178591	0.751802560811556	0.865987167673158	Tep1	heart
315.761079028299	0.0179407994627647	0.148914692423622	0.120477027288402	0.904105276649719	0.955804462622715	Ttc5	heart
725.185776259384	-0.15883462174829	0.125021836673164	-1.27045503389555	0.203922590413146	0.397531050663947	Osgep	heart
1416.71875350211	-0.0319282381539982	0.157343342764736	-0.202920807407391	0.839196930650205	0.915926959586545	Aamp	heart
1150.46284933442	-0.143220446095595	0.113167811351902	-1.26555815107392	0.205671316791569	0.399968564182465	Tmbim1	heart
3060.34021006985	0.267800107636273	0.127529230686979	2.09991157473214	0.0357366203703883	0.118060641242997	Arpc2	heart
502.015140767739	0.0700047334262459	0.16975104103239	0.412396489591415	0.680048835730148	0.821622803037469	Kmt2b	heart
1363.75193860724	-0.537585853026898	0.157629161843006	-3.41044668855321	0.000648565620905834	0.00531792628103317	Tmem147	heart
8468.10582654446	-0.239593878264722	0.196966461565665	-1.21641967043636	0.223825094496121	0.423501537831796	Rps9	heart
206.002253524091	-0.49176742333588	0.192810823590649	-2.55051772601697	0.0107563054059573	0.0482395228667195	Tfpt	heart
36.8959015002434	0.385541192142473	0.352488834141901	1.09376852484146	0.274056511815056	0.481115163047429	Susd2	heart
276.605752100354	0.162727030545453	0.173463475890102	0.938105440989484	0.34819022594487	0.56108508831839	Ggt5	heart
16766.8976177165	-0.307504652003256	0.216422703664452	-1.42085209544383	0.155359762037342	0.333395500666483	Crip2	heart
1080.263525166	0.406351318567998	0.151090516739541	2.68945614415027	0.00715685503001601	0.0357423609185719	Crip1	heart
516.664512298615	0.50887719090428	0.136514445744381	3.72764353346997	0.000193278488723178	0.00194332476060357	Cbfa2t3	heart
1779.57436021816	0.306186102522049	0.161020833064473	1.90153098015244	0.0572324986211302	0.166840396617545	Fbln1	heart
583.471049116731	0.107024301638172	0.135719452539908	0.788570095408409	0.430363314971029	0.636896587942308	Pgrmc1	heart
32.2539313743169	-0.275810581736124	0.358604227183576	-0.769122505616564	0.441820588971611	0.646178595340194	Gcat	heart
1980.37227414861	0.366071455683316	0.176834174297291	2.07013976307477	0.0384392581972079	0.124398775816581	Tek	heart
420.934676987371	0.28563406082449	0.141294674940525	2.02154866023594	0.0432230004813516	0.135384439524233	Elovl1	heart
381.104532409214	0.181511327097435	0.148238632962294	1.22445359532966	0.220781161696159	0.419370481718279	Med8	heart
53.8259008460378	-0.0201422298363023	0.282172821284808	-0.071382600721747	0.943093256893882	0.974225045204432	Hyi	heart
30.944459933227	0.0985365640465938	0.39776573799815	0.247725117156904	0.804347096801516	0.89602480313193	Cdc20	heart
25.5009906290994	-0.0496037675414227	0.641213149343881	-0.0773592487805023	0.938337758355748	0.972637288457899	Adamts4	heart
666.187580287296	0.0108277191196136	0.134021011903309	0.0807912055418991	0.935608002167783	0.972588998956552	Pfdn2	heart
1475.91599048241	-0.177262351241391	0.149696918606218	-1.18414161688715	0.236357008441002	0.438036218854096	Rnf114	heart
403.722578722185	-0.0445087853773774	0.14645936150734	-0.303898534851573	0.761205194054618	0.871225875990371	C330007P06Rik	heart
20.4525394783074	-0.469692144493327	0.507548639485349	-0.925413069710111	0.354751082939402	0.566681072533167	Neurl1a	heart
185.591478930182	0.0442668270794096	0.207533215924453	0.213299962043299	0.831093003157359	0.910987564495907	Srm	heart
169.816572882834	0.121251174774984	0.23447854976715	0.517109880180481	0.60507945694177	0.773512987024595	Epha2	heart
178.05374181541	0.169666067811397	0.230178185681224	0.737107503516292	0.461056976446933	0.661756931058485	Rbm14	heart
19.0615095327255	0.592923157050438	0.47191469038412	1.256420215628	0.208963656003886	0.404656302613427	Actn3	heart
22.613090707388	-1.47890129373422	0.455258159318732	-3.24848937567052	0.00116019541416221	0.00843351424125156	A530013C23Rik	heart
76.8647505730193	-0.273773911773538	0.265459102967321	-1.03132237212163	0.302389670439216	0.511378862601967	Zdhhc24	heart
112.359625557871	0.556375102967972	0.214739158349552	2.59093454237305	0.00957156955095212	0.0443896991683177	Bbs1	heart
59.7107128658728	-0.174072752373871	0.293864624718065	-0.592356948512863	0.553611588640577	0.738654069568945	Ndor1	heart
324.882158068292	-0.0940000258032615	0.149571899409501	-0.628460467336222	0.529702336273557	0.720817216204885	Nsmf	heart
2750.48963655676	-0.46686937734849	0.110651145480568	-4.21929095555978	2.450718359296e-05	0.000335382159420607	Pdk1	heart
664.763526347693	0.187957926656936	0.127066047695704	1.4792143933449	0.139083023900846	0.30886323415462	Ptbp1	heart
67.9689790325498	-1.0792365122586	0.317313454161492	-3.40116846009733	0.000670984646562657	0.00545259947450917	Mvd	heart
474.931131687621	-0.349329254543263	0.184002452678123	-1.89850325068409	0.0576298199683404	0.167803464819031	Cyba	heart
230.181202727294	0.202034966854648	0.166549860731437	1.21305995674431	0.225106898191851	0.424748792550078	Stimate	heart
240.842379890448	0.281130061344213	0.164837944574628	1.70549361113232	0.08810240281943	0.224896011986586	Sfmbt1	heart
36.964368980314	0.0369727420574656	0.397873729432024	0.0929258187270751	0.925962494112966	0.96759073827658	Prkag3	heart
26.9382230196471	1.53519261972838	0.440553057947361	3.48469404997708	0.000492700056550238	0.00426299758096429	Rundc3a	heart
2911.3970354717	-0.284425994436097	0.23294004056714	-1.2210266373424	0.222075934420171	0.420922073740606	Slc4a3	heart
20.2307597305703	-0.237375582661366	0.442526730351146	-0.53640959151328	0.591675503945857	0.764326886559105	Cdt1	heart
87.8831221860553	0.165301234645133	0.275887642263863	0.599161431402702	0.549065239427454	0.735159519034279	Runx1t1	heart
45.9677675337097	-2.92756073262748	0.377448739981332	-7.75618096585056	8.75251067435309e-15	7.19393106270322e-13	Snai3	heart
252.622586119189	-0.531553203030779	0.198618703731631	-2.67624948226931	0.00744512018909023	0.0368181297063962	Aprt	heart
421.548701587231	0.233016580014981	0.185948671132354	1.25312312583899	0.210160901061342	0.40603728888147	Gtf2h1	heart
824.549978657157	-0.329780673131092	0.120863119453944	-2.72854676117109	0.00636140703402832	0.0326237014889027	Hfe	heart
228.657315296834	0.195470833927497	0.204201319188204	0.957245696083576	0.33844325744325	0.551567105178655	Slc5a6	heart
49.4182322066218	0.518370808035093	0.368097410432788	1.40824356092487	0.159058961466805	0.338946512835842	Tcf23	heart
59.3125832111923	0.503424868618607	0.290966797292636	1.73017977756511	0.0835981602186779	0.217152519129673	Aplp1	heart
811.688561240078	0.299535609101964	0.113344217738019	2.64270745415795	0.00822460635050365	0.0396805265368712	Qrich1	heart
206.087349753252	0.0267224551889051	0.227281341838381	0.117574346282712	0.906404932632047	0.957197283346103	P4htm	heart
1444.04324616612	-0.00607168161144007	0.185035274469112	-0.0328136439328145	0.973823197787452	0.987795978783139	Usp19	heart
140.568367679441	-0.323552393251842	0.199091306151442	-1.62514576606237	0.104131503181095	0.253347045185958	Pola1	heart
4585.38657417372	0.0619120172588255	0.133062745791233	0.465284380618158	0.641727818664693	0.798953769309341	Cdc42	heart
223.881527163401	-0.0437564871906475	0.185379699222535	-0.236037103168028	0.813403879295799	0.901769930048906	Pknox1	heart
625.201539148659	-0.280660198219278	0.16966133305263	-1.65423784647628	0.098079195904606	0.24277803862889	Gmnn	heart
6169.88715791528	-0.0282063048586624	0.127038287058082	-0.222029952637558	0.824290566377985	0.90823067816048	Acot13	heart
979.608145291008	-0.221230760498356	0.132932485832455	-1.66423398398785	0.0960656791862065	0.23918250489354	Cdk4	heart
29.5046291037432	0.122678575052292	0.385698392453459	0.318068670890546	0.75043284752778	0.865864379596327	B4galnt1	heart
177.017419013257	-1.2368949831427	0.17872183205857	-6.92078281033598	4.49154666877353e-12	2.61891721148488e-10	Mettl1	heart
556.117690468114	0.0540925691113225	0.130268613222368	0.415238696208324	0.677967173764574	0.820601201374547	Tspan31	heart
2318.95381630605	0.787777556648548	0.153392671407843	5.13569226885679	2.8110731757459e-07	6.55628759143199e-06	Kif5b	heart
113.622239345092	0.0134728554334904	0.208300244635726	0.0646799789268207	0.948428803939312	0.976336396631052	Saal1	heart
221.730469840085	-0.07064715479875	0.177815359170969	-0.397306257052985	0.691141633852286	0.828440138307834	Cnp	heart
1188.17900627526	0.287723412870052	0.1590278741414	1.80926403263256	0.0704099939248368	0.193723322667972	Sulf2	heart
7557.91056913899	-0.449854394615582	0.101395896741704	-4.43661340420452	9.13852010375459e-06	0.000142824705951463	Sod2	heart
76.4680618830584	0.0486227413132009	0.247984203229465	0.196071929905185	0.844553866493986	0.919126820965458	Tmco6	heart
323.816620600176	0.0964828286234953	0.154928839389402	0.622755769705298	0.533445027920619	0.723707264686182	Stambp	heart
878.532929644439	-0.00337522691291673	0.114124060950815	-0.0295750684368949	0.976405949118758	0.989165634821527	Ezh1	heart
44.1153864217341	-0.166161105976688	0.330865086652439	-0.50220199313817	0.61552544106589	0.780227322957584	Hap1	heart
399.611358160882	-0.589264452281276	0.248861914154265	-2.36783701629813	0.0178924159947122	0.0711939702046818	P3h4	heart
5795.25714249069	0.0401586908531118	0.116186676857214	0.345639379138663	0.72961374762634	0.853311363090053	Ctnnb1	heart
836.459017402504	-0.306771592319515	0.14039969808263	-2.18498754989465	0.0288897594612778	0.1016693005132	Eif1b	heart
55.4558718111195	0.741556430725695	0.291744623715365	2.54179981547554	0.0110283316749259	0.0490765798201697	Chrd	heart
3506.36828315959	0.048422133245593	0.106273134411619	0.455638515921093	0.648649941665383	0.803393228402549	Psmd2	heart
288.255454088817	-0.504445347517028	0.198148469891943	-2.5457948163421	0.0109029253621049	0.0486940445085068	Vars	heart
107.540926363225	-1.23238217433587	0.285697614164065	-4.31358930994839	1.60625208700222e-05	0.000232157875795109	Vwa7	heart
734.369214526669	-0.106920045332796	0.180174533381109	-0.593424849374447	0.552896862823524	0.738133541718607	Abhd16a	heart
345.604392907673	0.00345378594309589	0.167285636110546	0.0206460400510032	0.98352801363189	0.992141156535988	Neu1	heart
439.87273038731	0.146729437403099	0.176079879043664	0.833311779858238	0.404668914397593	0.613682635105119	Ddah2	heart
1107.09637376408	0.510806570211474	0.148644155353928	3.43643898406379	0.000589415099523903	0.00493791568102285	Clic1	heart
165.465632101591	-0.235926328324366	0.208434646266497	-1.13189593261151	0.257678188904256	0.462965658336801	Lsm2	heart
31.9633896410846	-0.480220886970707	0.438419489881667	-1.09534566335161	0.273365229385372	0.48002512094389	Pole	heart
7951.5966380104	-0.246458145227881	0.142854562295605	-1.72523818117823	0.084484557475753	0.218771550996237	Atp1a2	heart
130.70371499936	1.09605779147745	0.361849256233797	3.02904530711337	0.0024532788828534	0.01540383666712	Casq1	heart
45.4655730185738	0.492973604551987	0.331665658035154	1.48635709669928	0.137184691649381	0.305491746835998	Stx1a	heart
167.996205193513	0.168717125757201	0.197370571053726	0.854824125280942	0.392648520192389	0.60356108035657	Zfp775	heart
253.727527262496	-1.51523593955846	0.172328533822363	-8.79271648141781	1.45986535886728e-18	1.94110325672941e-16	Scube2	heart
653.694519095618	-0.409566060674641	0.12914731213899	-3.1713092118701	0.00151753515567439	0.0105102790172697	Mrpl49	heart
102.396807747626	-0.492480465040568	0.269356998327751	-1.82835592948405	0.0674961509407935	0.188468156614785	Dennd2c	heart
767.147315838838	0.0411561960062224	0.114464883926456	0.359553031414119	0.719181413035461	0.847147647367334	Mark3	heart
1372.99246814249	-0.142512068716174	0.124504569605744	-1.14463323850243	0.252361117458031	0.456916025796383	Gatad1	heart
1326.57109576772	0.139172645992977	0.134422314925766	1.03533885776208	0.30051068886446	0.509844297297525	M6pr	heart
290.662233108474	0.142554160685519	0.19503781506891	0.730905238223433	0.464837036236938	0.66421493021545	Lrrc8a	heart
2970.92180026073	-0.20083741763177	0.134225044441788	-1.49627380245622	0.134582319060994	0.301121869673369	Ppp2r1a	heart
136.18050606496	-0.239988948546711	0.222656129575651	-1.07784568520119	0.281102627774014	0.489641804334055	Fance	heart
237.923089281555	-0.317192952095249	0.171123951840811	-1.85358594564436	0.0637984198271105	0.180582526930237	Tinf2	heart
325.561233600732	-0.394547156171808	0.2541387675911	-1.55248709164522	0.120545718987194	0.279525117243589	Dus3l	heart
213.622055487734	-0.379218893093967	0.185406428820693	-2.04533842491896	0.0408215049500645	0.129981006660135	Gtpbp3	heart
640.704066900138	0.935056319610096	0.160892365102002	5.81168857215375	6.18458145368355e-09	2.00433323881374e-07	Tgfbr1	heart
906.480280408931	0.80555262430483	0.133629898107199	6.02823646291047	1.65758411448827e-09	6.14221077928201e-08	Homer1	heart
50.9736383266682	0.630254095562115	0.295805064238883	2.13063997799963	0.0331188133836071	0.11209304857895	Rad51c	heart
7318.88148042258	0.174372862133952	0.18912473109194	0.921999260103021	0.356528961602134	0.568508200598646	Cav1	heart
1494.23527829565	-0.0730203751167324	0.122663957015273	-0.595287946789785	0.551651011401121	0.737263825992447	Arpp19	heart
685.210863168626	-0.00645507378622625	0.222290332600491	-0.029038931701216	0.976833540668835	0.98938022243359	Bcl2l1	heart
538.675709676058	0.217310569152583	0.185447921679493	1.17181452983958	0.24127152786323	0.4441523366341	Khsrp	heart
28.9040979645701	1.5970299863508	0.457489260895843	3.49085786893344	0.000481472315736634	0.00418154568803987	Dio2	heart
588.151875426642	-0.643940420851451	0.300124113665965	-2.14558041666772	0.0319064692359182	0.10927004675072	Ccdc124	heart
2472.45853570469	-0.492296677209816	0.12601315846619	-3.90670849935009	9.35619124441619e-05	0.00105850641242798	Cct4	heart
457.06503346576	-0.287556095987758	0.13558004824323	-2.12093224418893	0.0339275047279694	0.114130070144063	0610009B22Rik	heart
61.8578308347969	0.717502862759349	0.279411824300226	2.56790443481159	0.0102315358632705	0.0465951519754547	Cpt1c	heart
675.416318559444	0.122157809960934	0.132611780941772	0.921168610310513	0.356962403798341	0.568705632581103	Zfp655	heart
3775.02384641992	0.0102577977269739	0.105400962511738	0.0973216703389355	0.922470947244461	0.965818684786655	Rhoa	heart
1066.21370535652	0.317340332343235	0.117682386549807	2.69658307965165	0.00700549199114828	0.0351792470102646	Zmiz1	heart
77.5449993045247	-0.427569122652864	0.253168873439043	-1.68886923911605	0.0912444913571542	0.230715315062456	Ankrd26	heart
167.712671988847	-0.221533752943203	0.274124224926132	-0.808150950551339	0.419003689968308	0.626640861165346	Aldh16a1	heart
753.517274691285	-0.370909177688669	0.130171709833305	-2.84938392653555	0.00438039860633769	0.0244217076302331	Hnrnpa0	heart
125.986683155516	0.145318403942678	0.21670703853592	0.670575376436569	0.502491073222623	0.698735039038877	Prrg2	heart
3200.62704481973	0.371467565790404	0.138443595399696	2.68316901708563	0.00729281231344831	0.0361961190268057	Hnrnph1	heart
459.926114254557	0.545340755890748	0.163427143873129	3.3369044025765	0.000847170819953943	0.00653408630155545	Ift43	heart
800.394325387485	0.170744006019169	0.1704217393029	1.00189099534829	0.316396242087682	0.527610648624338	Id3	heart
24124.8942818825	0.38541453538146	0.215838012545989	1.78566569824831	0.0741534024636474	0.200187776654928	Tcap	heart
861.967500674856	0.0957462834936605	0.156293989623278	0.612603745828242	0.540138380839182	0.728298059904121	Arid1a	heart
5442.10396644819	-0.111190953700307	0.122603957295286	-0.906911621396594	0.364453535070269	0.576271631234369	Ctsd	heart
7707.31748591783	-0.640987129707603	0.25866143096814	-2.47809318655844	0.0132086642485928	0.056265693102654	Rplp1	heart
387.912644999281	0.257801191020358	0.218504094682747	1.17984604084728	0.238061454067441	0.43999466667292	Abhd8	heart
161.424306551223	-0.3179174059783	0.204651523137856	-1.55345731663158	0.12031391888805	0.279177399542272	Ift22	heart
85.1762746044244	0.448520615824162	0.246803062600178	1.81732192096322	0.0691678353455006	0.191502829840505	Fzd3	heart
751.69494076795	-1.10423617842686	0.249972747490538	-4.41742625751096	9.98831310742616e-06	0.000153642101508143	Mid1ip1	heart
622.699216878572	-0.0140131756451914	0.214257521432092	-0.0654034245870469	0.94785279749389	0.976257577004966	Ap2s1	heart
194.609595181654	-0.26001725380121	0.230199148159138	-1.12953178098409	0.258673570638316	0.464017021098055	Fgfrl1	heart
37902.0579692982	-0.162697793486526	0.113138088257563	-1.43804616104295	0.15042095705886	0.326234865380874	Fhl2	heart
988.312707225521	-0.181520319114275	0.21957858644535	-0.826675870597486	0.408420801347311	0.616949225061767	Emc10	heart
68.1622199774563	-0.0594484704129903	0.290437681477985	-0.204685804233348	0.83781761217136	0.914988803394986	Fbxw9	heart
386.495796494614	0.0153839744044595	0.16350780759189	0.0940870936442211	0.925039972679221	0.967145240401172	Fnbp4	heart
735.923118073555	-0.285095369800633	0.155935174496632	-1.82829416596312	0.0675054149352429	0.188468156614785	Cers4	heart
762.756951687101	-0.0273024558707121	0.130749852721904	-0.208814429250506	0.83459310672665	0.913199897875908	Scrn3	heart
358.174190220459	0.203387723151616	0.151647739255192	1.34118532957064	0.179860288273187	0.367367331317271	Phax	heart
151.875037681277	-0.0832633934098516	0.192771118947794	-0.431928775764386	0.665793179768122	0.814210977901358	Tle1	heart
24.7195051335417	0.134639873289726	0.409195459228606	0.329035599621614	0.742128780204329	0.860950184969632	1700109H08Rik	heart
34.9151766163585	-0.659774322077904	0.380656550462173	-1.7332535622383	0.0830506106490519	0.216001245081141	Relt	heart
478.076723444429	0.132506224431241	0.163648641422999	0.809699507915488	0.418112900918047	0.625793376494716	Snrpb2	heart
672.535029974992	0.151890045300221	0.134317906925498	1.13082498660785	0.258128760986115	0.463474522531624	Ubc	heart
383.023540289492	-0.236940694600177	0.156583733545663	-1.51318843429595	0.130231801205987	0.294339153586373	Prpf31	heart
173.573533696866	-0.0857189755627874	0.237741940742249	-0.360554706061396	0.718432354042755	0.846750914175186	Sertad1	heart
778.304948324359	0.257342827086927	0.14346649363479	1.79374863473015	0.0728532987953156	0.198010041586312	Carhsp1	heart
867.404600898967	0.210034335360544	0.1667801414456	1.25934858634865	0.207904451167137	0.403276703401253	Elk3	heart
713.238290604343	0.00447965797636144	0.119857612392526	0.0373748307424216	0.970186140803406	0.986233028246288	Herpud2	heart
677.664254652104	0.751920103288044	0.125155679808752	6.00787838344246	1.87966748132701e-09	6.83898216406019e-08	Rdh13	heart
646.010353152563	-0.353376542636047	0.138063463976539	-2.55952250116003	0.010481607018996	0.0474331828083519	Nutf2	heart
1124.15128032597	0.494911277126286	0.152862749294518	3.23761857882556	0.00120531837579923	0.00870585702456577	Arpc5	heart
28.7780382116891	-0.138599517998778	0.426746519986324	-0.324781835369671	0.745346193191385	0.863123011571775	Pou2f2	heart
818.786933448789	-0.712638558736693	0.134766189668092	-5.28796251115959	1.23686318652366e-07	3.10787501232575e-06	Mgst1	heart
1790.53275286176	-0.155860430261786	0.133849310723744	-1.16444701447489	0.244242904152276	0.447344508708744	Nfib	heart
1124.04747814957	-0.227104247135197	0.127325913651239	-1.78364514043279	0.0744813456676052	0.200636422564424	Ubqln4	heart
282.092396286011	-1.07992067212238	0.18226885694143	-5.92487762442818	3.12530039764138e-09	1.09057796995957e-07	Rbfox1	heart
3320.56361993031	-0.291427079438862	0.13152207185446	-2.2158035934938	0.0267049562554904	0.0958344090346951	Rps18	heart
6275.83863244309	-0.475608424630887	0.148184923995927	-3.20956013476756	0.001329382358065	0.00945184621857155	Rpl10	heart
5430.19508543389	-0.438779481966734	0.142221367243543	-3.0851867793913	0.00203424360842937	0.0132483149371887	Rps15a	heart
1285.33743112224	-0.356158660035142	0.161896055392055	-2.19992179038984	0.0278124444125491	0.0986669244838326	Ncaph2	heart
1340.87100748275	0.240191556059748	0.138538084349672	1.73375831770202	0.0829609742633095	0.215820521370732	Hipk1	heart
335.435009069302	0.145913805169419	0.159005901404302	0.917662828113569	0.358795414115488	0.570959252413309	Gprc5b	heart
656.099420207151	0.60033527460846	0.138651786242589	4.32980555734131	1.49241059042447e-05	0.000217547543758029	Man1a2	heart
221.104394151957	0.0771056298688333	0.235946056711137	0.326793466878033	0.743824101063589	0.86218129597414	Acyp1	heart
532.25631607332	0.109998836545372	0.162845462171798	0.675479900258605	0.499370917204803	0.696170498082833	Cd163	heart
1523.934991918	-0.379775036821328	0.227235300754908	-1.67128538373951	0.0946653220520582	0.236878864118175	Hdac5	heart
942.545640547507	0.0988518617025189	0.12599645680239	0.784560647269278	0.432711210625799	0.639089820066941	Rala	heart
4422.47277905248	-0.228181856815268	0.104515722662583	-2.18322995815594	0.0290188796193415	0.101965900985397	Vdac3	heart
483.389792876507	-0.246770350940119	0.187709707644331	-1.31463819339432	0.188631527635871	0.378518475515449	Vps72	heart
877.921703263725	-0.059897313730805	0.132270124655356	-0.452840835274585	0.6506633566555	0.805039630863675	Gabpa	heart
33.3397496621183	0.351532087657571	0.400735741990199	0.877216706230733	0.380368943633106	0.59189711073564	Bmp7	heart
874.758310440346	0.334799974888631	0.202628802027431	1.65228225967257	0.0984770240453021	0.24345361769779	Dynll1	heart
478.024779425656	0.0274853665516799	0.155017737542921	0.177304655501567	0.859269094170253	0.927565344683383	Pdcl	heart
848.722064289486	0.46823466357335	0.161414235382083	2.90082632715134	0.00372180090117491	0.021468486276349	Tmem184b	heart
2278.1111858629	0.0497754089911304	0.142809098338556	0.348545082702843	0.727430862659248	0.852156494386775	Nf2	heart
187.811373836561	-0.108948436671707	0.190359393001925	-0.572330237839144	0.567098268068676	0.747800209677107	Zmat5	heart
1689.78815366826	0.00449263827198382	0.117732056461356	0.0381598555823958	0.969560228171215	0.986041694704731	Ewsr1	heart
998.436267605387	0.345080354510552	0.134486343096241	2.56591373195125	0.0102904417777106	0.0467799900670321	Ap1b1	heart
1439.56948249196	0.0840644342196401	0.133771431667329	0.628418438614733	0.529729861249369	0.720817216204885	Bcl2l13	heart
25.6397025527126	-0.175826052266765	0.420361335364783	-0.418273607667046	0.675747083764076	0.819056586255561	Dqx1	heart
24.6250496180006	-0.224428532542957	0.513121198314473	-0.437379186983838	0.661836375641948	0.81191292117054	Ccl8	heart
225.334292803201	0.0850982596372487	0.177311782860735	0.479935728265091	0.631273095122222	0.791525146535692	Lnpk	heart
33.4861185846684	-1.31937129619662	0.502735968253134	-2.62438213995521	0.00868063300959983	0.0412559644200203	Prr29	heart
19.6674455083806	2.84474758392226	0.571907675724911	4.97413779298635	6.55386803997537e-07	1.40599018140604e-05	Fam163b	heart
541.57461705361	0.445614516017553	0.166966724629741	2.66888218000162	0.0076104141308193	0.0373955118897908	Rarres2	heart
2334.9066760649	0.183427983616226	0.125258464822988	1.4643959102919	0.143085804908478	0.314779542433291	Pttg1ip	heart
22.3609529315589	0.95095760079771	0.476239357903821	1.99680598634975	0.0458462630264173	0.141417695761332	Trpm2	heart
945.622747278182	-0.161984300892146	0.144508970005934	-1.12092903911428	0.262318068899385	0.468096747588701	Ube2g2	heart
40.5107265659731	0.857267196992349	0.382618356822842	2.24052814431294	0.0250566557378417	0.0913610397881111	Met	heart
69.4500715191703	0.0922596077039287	0.312861939525606	0.294889202067283	0.768078520861252	0.875460913496677	Slc16a12	heart
52.2223925160984	-0.582040083574244	0.308716443368919	-1.88535497890114	0.0593819280235531	0.17169040600834	Syn2	heart
289.44060073826	-0.132538607258939	0.153953686036699	-0.860899213724214	0.389293554760361	0.600154158891535	Elk1	heart
897.162038007351	0.156707780930674	0.147833475135447	1.06002906843052	0.289131375161145	0.498472928048801	Nav1	heart
1442.84633035418	0.0885617107007586	0.142704709343453	0.620594170355047	0.534866676303477	0.724627239746265	Tnpo1	heart
274.938151071735	-0.0460046138999155	0.169634834549421	-0.271197917704295	0.78623881442217	0.886160390245395	Rnmt	heart
549.702451397168	-0.00867812879990586	0.211327578792558	-0.041064819128148	0.967244221201493	0.984930230171891	Kcnq1	heart
1493.05959306829	-0.225484334951335	0.117601286847347	-1.91736281971154	0.0551918542565665	0.162223681766629	Srp14	heart
435.780006889354	0.161888940872292	0.144325760707895	1.12169123570354	0.261993744270555	0.467946412727773	Cdk9	heart
175.814242726019	-0.0496967194340667	0.208078975900305	-0.238835851719481	0.811232868919621	0.900240851040204	Tor2a	heart
111.582164883897	-0.0414738131863932	0.224663162710832	-0.184604421508011	0.853539317691565	0.924532045713068	Fpgs	heart
630.661543761389	0.209046372152764	0.179937438219733	1.16177252616814	0.24532787667116	0.448573244344854	Mrtfb	heart
1967.04269671595	0.352944976523449	0.130222847451603	2.71031530511279	0.00672192737499973	0.0340437925406445	Cbx5	heart
214.430116026556	-0.012902503119785	0.209109351208355	-0.0617021813956519	0.950800002779072	0.977597229684828	Apobec3	heart
159.448296879151	0.381754064089873	0.19278979105848	1.98015705081641	0.0476858842099909	0.145586530356034	Sardh	heart
338.549188206619	0.0389000232248829	0.167901375598073	0.231683767249191	0.816783640233187	0.904047699143474	Vav2	heart
848.030625544568	0.214514320954724	0.130554377882928	1.64310323738884	0.100361575174426	0.246852606718627	Ppp2cb	heart
1103.61429750187	0.172856341486858	0.544810982031812	0.317277637910693	0.751032943843283	0.865975955868989	G0s2	heart
224.225201634495	-0.303139485682504	0.179411204963769	-1.68963519164659	0.0910977689571163	0.230429729264163	Dmap1	heart
284.822089756548	-0.197697433878945	0.152068453524564	-1.30005552957774	0.193581937807051	0.38473881419365	Mcu	heart
289.146924500476	0.431237499222424	0.163021074566043	2.64528681564862	0.00816217003742854	0.0394490428589001	Bcr	heart
518.535817626142	0.557278181629811	0.140204083860945	3.97476425995211	7.04490014080913e-05	0.000832984997655214	Fxyd5	heart
170.130734000536	-0.0817862708167411	0.209751708655375	-0.389919449720035	0.696596111200492	0.832126001743019	Tfcp2	heart
216.983975500635	-0.159166305390543	0.177480433854333	-0.896810436699627	0.369820077909795	0.581602832712182	Pou6f1	heart
694.014679486872	0.133060491953415	0.127033502749254	1.04744409209953	0.294894804870621	0.503670542185138	Ubp1	heart
85.1055726409012	0.281939639779953	0.261473407275412	1.07827271123975	0.280912071448519	0.48943484904145	Nuak2	heart
433.638666782988	0.423478329901845	0.150346138819358	2.8166890964234	0.00485214703621788	0.0264912360072268	Ick	heart
16143.4432906672	-0.154311672742711	0.147760873347471	-1.04433378909337	0.296330985139595	0.50495066332517	Sdhb	heart
261.220709617008	0.0172371144144193	0.177337076639107	0.0971997212376404	0.922567789418387	0.965818684786655	Cox4i2	heart
705.825550926268	0.102644702303238	0.137405030590364	0.747022884549587	0.455049747179935	0.656727179027188	Snap47	heart
177.090899918947	0.00357710476586936	0.192268819278078	0.0186047055331203	0.985156449014034	0.992943384084175	Kdsr	heart
722.356858063611	0.28963620167308	0.156180934977717	1.85449140584543	0.0636688885532515	0.180489988659997	Vps4b	heart
7345.17837736171	-0.220660506263034	0.151854506040678	-1.45310476466154	0.146194668365687	0.319762753315394	Rps25	heart
761.991558664236	-0.743385956838325	0.126971101447725	-5.85476496905389	4.77685062923164e-09	1.60926790087004e-07	Taz	heart
625.868630512592	0.143167616606399	0.158969457885208	0.900598256488869	0.367801961953746	0.580015021832745	Aldh3a2	heart
315.720815364147	-0.175239447899037	0.226826446655006	-0.772570617241866	0.439776539323156	0.644155781269473	Tmem115	heart
545.435367877517	0.599732297098313	0.219825152093088	2.72822418812361	0.00636763154350649	0.0326287591695966	Hyal2	heart
442.874730515098	-0.0473957904262346	0.262392602584199	-0.180629293506953	0.856658561182915	0.92602197819519	Ifrd2	heart
71.3433491225792	0.411465825297463	0.265162071056817	1.55175219313058	0.120721528905412	0.279779420332639	Hyal1	heart
547.785980835228	0.0514763697893088	0.160320453822767	0.321084231998341	0.74814655923154	0.864547442547229	Tusc2	heart
301.34337324573	0.00385979695391791	0.176316206007736	0.0218913339920016	0.982534637592615	0.991752089685495	Nprl2	heart
986.581532164767	-0.315813239150117	0.209243971423966	-1.50930627535367	0.131220531784216	0.295587408892826	Slc38a3	heart
34.1949990186447	1.0772562613752	0.571756850371397	1.88411605505985	0.0595492789959101	0.172045387952869	Cacna2d2	heart
115.113920862452	0.422918028933476	0.241597418144478	1.75050723712853	0.0800308264479114	0.210636689053878	Rassf1	heart
117.728861734182	-4.13800495528923	0.405308183869236	-10.2095272683274	1.7973838082964e-24	4.08725078006601e-22	Epn3	heart
635.328918339496	0.274500206126537	0.166947135843426	1.64423429452531	0.100127815577111	0.24649784205186	Slc3a2	heart
1097.67802126773	-0.0755522073842584	0.116850932540952	-0.646569143620484	0.517910833718719	0.710831447063495	Nxf1	heart
620.207968180476	-0.0459725994491634	0.127249582508281	-0.36127898059054	0.717890905167461	0.846358205314511	Stx5a	heart
904.694646974108	-0.239240313896151	0.168993786944808	-1.41567520452267	0.156870621325854	0.335634743197421	Slc47a1	heart
34.5136621846676	-0.297378914493443	0.366282356595206	-0.811884354075205	0.416857992971984	0.62466891335637	Tnfrsf13b	heart
813.751132459074	-1.10809886991728	0.225682653800288	-4.90998688316499	9.10824851898982e-07	1.90019790203512e-05	Prox1	heart
6015.93031679557	-0.0526855729285699	0.107720035928654	-0.48909724615637	0.624772851012417	0.787109951912596	2610507B11Rik	heart
511.026649513787	-0.244618253700352	0.130422421760537	-1.87558435427219	0.0607123764515517	0.174423163997527	AI597479	heart
422.556069893572	-0.106956528564071	0.159958129932527	-0.668653282013158	0.503716675434235	0.699939944966362	Tmem86a	heart
306.049399886733	-0.127463392099025	0.174089456930036	-0.732171806074683	0.464063710499688	0.663977062296324	Ifi35	heart
715.645067292869	-0.509382155723552	0.132556709918776	-3.8427489339142	0.000121663910557237	0.00132556225392205	Rdm1	heart
1676.83020855635	-0.244514921607203	0.106315555359002	-2.29989789153183	0.0214540055835438	0.0815826232390947	Nedd8	heart
562.290777767557	0.120506543049537	0.148562072190719	0.811152814931359	0.417277918828683	0.62509221832439	Gosr1	heart
380.92899701097	-0.462566311905543	0.206449026502464	-2.24058364305255	0.0250530572144144	0.0913610397881111	Mrpl52	heart
1157.04336607951	0.102866398709382	0.123161318580503	0.835216770126933	0.403595669084176	0.612739110208686	Kansl3	heart
225.6467136941	0.0512127830635478	0.165021275705146	0.31034048697486	0.756302045782752	0.867933358481409	Ebf3	heart
34.8427195803465	-2.78754808008373	0.447664869178111	-6.22686360268011	4.75865055173762e-10	1.91525156719493e-08	Uckl1os	heart
1447.72309268926	-0.178086590019233	0.11870139577742	-1.50029061455324	0.133539139547954	0.299278584098602	Faf1	heart
18.3121279595589	-1.19958458374284	0.490118474778719	-2.44754002444906	0.0143835148881153	0.0601880482651045	Tsacc	heart
428.24569774842	0.141083475512736	0.152473972411846	0.925295467029987	0.354812236018353	0.566681072533167	Mettl16	heart
276.852168458564	-0.485168199598035	0.198838327096543	-2.44001348574246	0.014686713633777	0.0611385771727874	Pigyl	heart
1096.05063686223	-0.176263701915423	0.146566298260322	-1.20262095725686	0.229123033963204	0.429239966414109	Rbm25	heart
229.374830616179	-0.043686487047551	0.201750105649783	-0.216537616705818	0.82856870671846	0.909858465550637	Psen2	heart
341.3388074656	-0.254659739732874	0.167772297671565	-1.51788908697789	0.129042361523231	0.292710553719528	Plcd1	heart
509.99004918868	0.131658402722794	0.132238945431155	0.995609896112917	0.319439724589176	0.530933804640604	Fads1	heart
410.262086943485	0.0832526455871252	0.13905693595315	0.598694664286105	0.549376515960821	0.735398351494835	Lmbr1	heart
69.0912268409351	0.323776151518118	0.332573261433105	0.973548354798342	0.33028083990823	0.5427377790808	Tnfrsf22	heart
269.630653131864	-0.157091532898057	0.162102414093032	-0.969088176613464	0.332501196324445	0.544939503922386	Cars	heart
237.517605921913	0.0283896730340734	0.171639296720286	0.165403107426728	0.868626707991333	0.933625963686647	Kdelr3	heart
852.523540703193	-0.293330282954554	0.126752798025078	-2.31419177741953	0.0206572048119142	0.0795507846245345	Apip	heart
1878.71729240179	-0.0553175642598123	0.109128673110582	-0.506902197956334	0.612223443399634	0.778131974615293	Pdhx	heart
334.491244108516	-0.0551179378869301	0.162207504805153	-0.339798938114108	0.734007947646202	0.855569057245732	Vac14	heart
544.381394293805	-0.203982813393961	0.238821645343585	-0.85412196662701	0.393037413849	0.603964689104151	Akt1s1	heart
553.219922030523	-0.0780685572914657	0.151388776031782	-0.515682597731527	0.606076110850659	0.774061823125189	Tbrg1	heart
1577.18449548662	-0.465626549638215	0.153754723999622	-3.02837231615308	0.00245874955871315	0.0154310850869743	Adssl1	heart
400.255578393391	0.150774269063275	0.140901578988307	1.07006798749776	0.284588707301297	0.493320838828471	Brf1	heart
40.7727796870715	-0.908818584858612	0.416387771385828	-2.18262554117252	0.0290633972922427	0.102048254942393	Vipr2	heart
1162.91777864302	0.0128811147213287	0.155006223786509	0.0831006291661548	0.933771525576124	0.971880287967094	Odc1	heart
161.964393963424	-0.124177319139519	0.233146881100138	-0.532614112415186	0.594300731044578	0.765760617090586	Thg1l	heart
995.045561634662	0.964981980995903	0.227752298598286	4.23698020584177	2.26546099375213e-05	0.000313948217018424	Adam19	heart
4223.11456435258	-0.212703753855608	0.159347138709943	-1.33484514110284	0.181927035701435	0.369817114885336	Pabpc4	heart
44.9081770084769	0.30839429370118	0.359096394542619	0.858806433002429	0.390447317826174	0.601321430274727	Exoc3l2	heart
1251.15335370648	-1.45077301948009	0.453863477324631	-3.19649650602402	0.00139107511254624	0.00978846252479675	Plin5	heart
526.229433190686	-0.00818556354469131	0.171623750583233	-0.0476948179775475	0.961959464059576	0.982339887389214	Sugp1	heart
303.7422853145	-1.45161940873509	0.158677010580498	-9.14826541932286	5.78550059854626e-20	8.58014893114839e-18	Dhdh	heart
209.091656447499	-0.0805598331821714	0.208119329807106	-0.387084819352618	0.698693415714794	0.833471879913718	Zfp790	heart
93.1245136060614	-0.6325124592963	0.270936408508336	-2.33454212661433	0.0195673529035059	0.0764538840250385	Fuz	heart
792.304535374703	2.4952414167571	0.135407543333455	18.4276396671072	7.88489347451318e-76	1.53687837951797e-72	Pgam1	heart
471.370979167954	0.208474841438919	0.179243475747984	1.16308189499759	0.244796277029374	0.447781258049174	Evi5	heart
274.691624743077	-0.328633516769149	0.161831283091824	-2.03071687062309	0.0422837239627238	0.133360871416413	Evi5l	heart
189.961596447599	-0.584777709979202	0.232288198706598	-2.51746629073409	0.0118202279748728	0.0516634484955887	Snapc2	heart
1016.56499628211	-0.0823203817519264	0.198776659197829	-0.414135050282732	0.67877520479335	0.820665387168849	Git1	heart
469.957687610886	0.243874912102289	0.151448326314055	1.61028462999698	0.107335733090904	0.258456412698987	Gltp	heart
1963.46429429438	0.0505359536652238	0.114529911589013	0.44124677094461	0.659034356694008	0.809931972863722	Bnip2	heart
449.789369519335	0.0630534721784925	0.156748236482314	0.402259531548905	0.687493034045664	0.826445370618418	Ccnt1	heart
103.417394089954	0.416873116423859	0.288637864345712	1.44427730356456	0.148660987475716	0.323446103192261	Scarf2	heart
348.3268800058	-0.328967933041864	0.159737282956643	-2.05943112936981	0.0394529562421602	0.126687722986122	Brms1l	heart
406.641912804962	-0.013209528659622	0.148729397894308	-0.0888158551479455	0.929228256902968	0.969507362864029	Med15	heart
580.701533568706	0.00859182093402315	0.163080494118455	0.0526845407261423	0.957983256631633	0.980549403862116	Dhdds	heart
314.034710856529	-0.188689628641565	0.221566505861924	-0.851616212962952	0.394427138016847	0.605214110560263	Tjap1	heart
3764.87946078189	-0.19402643765776	0.148941915919816	-1.30269868263421	0.192677651984183	0.383508498986776	Rpl15	heart
672.515335729727	0.480323777701402	0.155294528950174	3.0929858311719	0.00198153595691643	0.012985627567804	Tmem167	heart
857.665027853422	-0.279331409285518	0.18231482900645	-1.53213762592859	0.125488476548292	0.287324177550746	Steap4	heart
112.091589610098	-0.299453134055237	0.226328111365222	-1.32309297439422	0.185804460813535	0.375017169133117	Mplkip	heart
28.6494446764001	0.103902228248605	0.446195347477679	0.232862643763454	0.815868067022466	0.903474061070897	Kif11	heart
263.623999412646	-0.166654881847781	0.17453940768311	-0.954826672440389	0.339665356647233	0.552898368658416	Rpa3	heart
86.7387707817298	0.207863305202206	0.261637134528587	0.794471723506417	0.426920864059634	0.633624308629354	Mlkl	heart
858.619533249344	-0.0446522190470712	0.125521601319062	-0.355733344522672	0.722040271039821	0.848756565698915	Tnpo3	heart
267.687478899623	0.402932619444633	0.167406902777345	2.40690564582358	0.0160883258644868	0.0655642527165645	Ttll5	heart
613.044175957001	-0.197185981233256	0.151939195914574	-1.29779534534408	0.19435766954031	0.385887084285214	Zfp715	heart
161.241458076426	-0.149144126923016	0.184275273085197	-0.809355072039759	0.418310937023521	0.626021106147738	Cdh23	heart
6948.97728079712	-0.551923598798999	0.166860214288785	-3.30770040750268	0.000940653807704137	0.00709860650017436	Rps5	heart
264.61884145059	0.122358661451047	0.234428002892632	0.521945586454051	0.601708217051729	0.77100928939273	Adgrl1	heart
1647.2739167613	-0.229728165301033	0.115444412599426	-1.9899461578808	0.0465968669478342	0.142980648837039	Amotl1	heart
238.934890775316	0.582485972789373	0.211405199260725	2.75530580527964	0.00586373015720334	0.0305594859682515	Etv5	heart
82.8468275677365	-0.109038511109658	0.249575742873388	-0.436895468503021	0.662187158433388	0.812051194469274	Gfod2	heart
19.9738669229919	0.397775954324963	0.513175752279215	0.775126167903071	0.438265110272779	0.643664390415458	Enkd1	heart
1030.29011307325	0.645242282219178	0.132220471963684	4.88004824545176	1.0605989198733e-06	2.17279454395666e-05	Atp6v0d1	heart
518.53538975451	-0.105435372410263	0.184625183493797	-0.571077955970214	0.567946800645538	0.748485091085456	Ptprs	heart
1235.15651235316	-0.102297694885785	0.165666686466359	-0.61749104221118	0.536910887939415	0.72624290225492	Slc41a1	heart
1401.64216333984	-0.551836757976603	0.226382864625242	-2.43762600535214	0.0147840607205117	0.0614606107466977	Zfp651	heart
685.751482213965	-0.0613564562790067	0.140137842982007	-0.437829318429602	0.661510016139718	0.811681689727619	Nelfb	heart
205.099172276487	0.440093546645296	0.19559649748512	2.25000729718474	0.0244484820936861	0.0897461004213208	Tmem175	heart
2475.30223430543	-0.380792807797839	0.13622315315169	-2.79536039937213	0.00518418861975682	0.0277602313689019	Tango2	heart
215.856128938709	0.512189776999585	0.215329271118989	2.37863516807501	0.0173768647820127	0.0696913412950564	Aldh1a2	heart
14736.0676873877	-0.213018681864698	0.122380066801917	-1.74063217508688	0.0817480740173764	0.213795423019567	Ndufs2	heart
809.589433832959	-0.046912431511616	0.122148911803911	-0.384059348698298	0.700934460265057	0.835064776091155	Atraid	heart
192.923176951717	-0.702371492722362	0.225597959243429	-3.11337697857663	0.00184959601039422	0.0123282305646403	Cad	heart
198.767464664551	1.71496367667731	1.14345933582804	1.49980294265157	NA	NA	Lypd8	heart
477.932656428963	0.297028576997568	0.185855808264432	1.5981667711722	0.110005866737472	0.262812124980927	Sh3bp5l	heart
1852.42205401683	-0.171478682866688	0.165461275529997	-1.03636746614829	0.300030742263193	0.509283335088207	Atad1	heart
1578.32089806472	0.712985358806337	0.129417148202372	5.5092031366	3.60461741174304e-08	1.01404948383138e-06	Pten	heart
3031.1846897907	0.219638857712488	0.157784346974439	1.39201930941901	0.163916550794333	0.345882681570968	Pea15a	heart
2435.28149698302	0.0443371291888679	0.13349595641795	0.332123386944074	0.7397960912721	0.859504277317084	Timm23	heart
60.3999769746229	-0.0948019569533023	0.269532048858136	-0.351727957231534	0.725042291814901	0.850683382493269	Tnfaip8l2	heart
458.686167697963	-0.13232378426867	0.176387472311325	-0.75018810879674	0.45314141954579	0.655719595425048	Trnt1	heart
787.669083802106	-0.185094409547828	0.172798390269345	-1.07115818185179	0.284098311054211	0.492721158767466	Ehmt2	heart
513.464561512843	-0.0583166526738678	0.142988735320647	-0.407840887207617	0.683390493517833	0.823990662409853	Elof1	heart
428.454791925002	-0.396894486468589	0.252921915569135	-1.56923723108565	0.11659267197396	0.273755019172726	Med16	heart
765.931183085469	0.448367452078653	0.149425719397515	3.00060427272141	0.00269444482526068	0.0165972935421475	St3gal1	heart
1359.463685351	0.212698611480349	0.189505060916537	1.1223901380345	0.261696595772649	0.46766055700354	Tmem259	heart
214.1939012393	0.48885715145155	0.198932597920328	2.45740093158255	0.0139946403816289	0.05898760375871	Rnf170	heart
138.721018645188	0.317225371714924	0.202886525755263	1.5635605693085	0.117920800976082	0.275781866389725	Clip3	heart
184439.879299262	-1.49133548308105	0.162256728370992	-9.19120888269844	3.88450954422217e-20	5.8889164690408e-18	Myl2	heart
52.1955700193846	0.117473831493608	0.322964623443581	0.363735910890346	0.716055224534447	0.845274430199849	Dedd	heart
437.309333448637	-0.261811227842811	0.156890430746674	-1.66875204941944	0.0951665292057154	0.237594491072479	Nit1	heart
112.999256915098	-0.153714969797387	0.210278375143362	-0.731007026721545	0.464774860967331	0.66421493021545	Prdm15	heart
356.417469228804	-0.129658056546296	0.154941571605592	-0.836819035735256	0.402694295720403	0.612048676708162	Rnf168	heart
156.962793062397	-0.259401976019201	0.220881507125092	-1.17439426865325	0.240237139866109	0.442765408771822	Tctex1d2	heart
2156.45502372913	0.463000478472762	0.128481015244565	3.6036489717289	0.000313780767323141	0.00292433387251157	Chp1	heart
109.12822639129	1.02242992153544	0.219952381493043	4.64841487323371	3.34495613902683e-06	5.88788899847599e-05	Trpv4	heart
127.677883925613	-1.46538764056048	0.229531858198168	-6.38424509810455	1.72245028476738e-10	7.58100376947293e-09	Klhl3	heart
492.444770260938	0.120000472488097	0.193953173658832	0.618708475991121	0.536108425205547	0.725492648819946	Tvp23b	heart
1221.72411551053	0.261557486725426	0.123702074805171	2.11441471080719	0.0344798622954392	0.115332983858537	Dnajc7	heart
1330.83497199732	-0.323423123638815	0.127545922209956	-2.5357386424822	0.0112210444767813	0.0496272061073597	Cacybp	heart
96.0175663570458	-0.268978272672196	0.252344017689826	-1.06591895910454	0.286460277774066	0.4954321244707	Cluap1	heart
163.333231105598	-1.14440807633527	0.204650659827066	-5.5920077526372	2.24458795342469e-08	6.54383718729197e-07	Zswim7	heart
62.3898840071874	-0.250460558627524	0.321974565835189	-0.777889265811539	0.436634296911906	0.642034523878224	Pigl	heart
4005.84656893153	-0.347107744424644	0.193317001628719	-1.79553656171066	0.0725682529489622	0.197589551633534	Ndufa2	heart
346.194808945887	-0.305791055423825	0.162058722433668	-1.88691513071126	0.0591717416576292	0.171336851268398	Pam16	heart
307.109311057586	0.596453502175001	0.149363283668294	3.99330737465311	6.51580142328147e-05	0.00078396467918212	Glis2	heart
20057.1814449715	-0.305991529873357	0.116401103510635	-2.62876829037451	0.00856947286350622	0.040908606262487	Cox6c	heart
800.952283744148	0.122198361993718	0.123462399066212	0.989761764860761	0.322290577492102	0.533774400037725	Bicc1	heart
1078.08617728735	0.199858666197371	0.120673589642697	1.65619226865741	0.0976828884343371	0.242036525239763	Ube2z	heart
555.149831577544	0.211819974258582	0.143229424687585	1.47888588340425	0.139170816841514	0.30895649609268	Tmem87b	heart
1178.85805628503	0.0944497988867876	0.134706815993832	0.701150852612477	0.483208877514906	0.681225658691195	Anapc1	heart
205.094912565404	0.238170315730648	0.19949088636827	1.19389070882654	0.232520722428269	0.433048421623164	Mertk	heart
1127.18942597352	-0.0315650102710427	0.11037173623108	-0.285988164623565	0.774887186414145	0.879368153626959	Tsg101	heart
259.887993581199	0.226563804677152	0.163894144032276	1.38237888861077	0.166855394822975	0.349069269358903	Hps5	heart
550.462297080228	-0.288522652808958	0.181192386037215	-1.59235528114133	0.111304898187324	0.264848976433178	Map3k4	heart
514.193844691395	0.463748011356874	0.135493616138324	3.42265580160941	0.000620125477346206	0.00513409709521337	Piezo1	heart
39.4133606724981	-0.611016222305222	0.378333657061463	-1.61501946998588	0.106306478586378	0.257080041444974	Blk	heart
563.950928079184	-0.86875647367982	0.21637512877803	-4.01504774872273	5.94337611342104e-05	0.000725975144955387	Rnf166	heart
789.611446465167	0.111267997713375	0.165278943914194	0.673213387490792	0.500811545388655	0.697252318906409	Ankrd28	heart
1419.89577519602	1.40170276597689	0.162291341361613	8.63695348264852	5.77318774076152e-18	6.84951074216959e-16	Ankrd52	heart
377.687019085319	-0.098706055823582	0.157899500905079	-0.625119492194716	0.531892635677316	0.722463227593957	Pkd2l2	heart
905.19520497826	0.168883642514662	0.137468846501289	1.22852302039995	0.219250693131776	0.417567902999714	Srp19	heart
400.942109001952	0.371768695107644	0.142299782856428	2.61257387499134	0.00898632686226406	0.0423229008314569	Wdfy2	heart
462.072543618054	0.157184358071538	0.130588032550904	1.20366587198767	0.228718748106683	0.428632673894343	Rbsn	heart
570.355804555159	-0.492592310987684	0.144119831459695	-3.41793565811548	0.000630980214822314	0.00521447247185684	Mrps25	heart
402.126299992303	-0.29996118653056	0.147600488261866	-2.03225063861837	0.0421282888193772	0.132962843546514	Dguok	heart
1760.98122167192	0.000447499342729616	0.141686112777982	0.00315838534882268	0.997479977282814	0.998871072903632	Camta1	heart
897.600557882791	-0.310506686225262	0.118453819961983	-2.6213311341493	0.00875871418893119	0.0415521197474886	Csf1	heart
507.946934541625	-0.0618484117125597	0.148838488097292	-0.415540445910272	0.677746313046346	0.820601201374547	Strip1	heart
19.048509554043	1.29120676159576	0.581266811311071	2.22136673979956	0.0263261318666541	0.0948491532053417	Kif1a	heart
7818.51298504865	-0.539252634771096	0.107847540682313	-5.00013844877165	5.72891617233291e-07	1.25064531608496e-05	Slc25a11	heart
634.887524043867	0.149163440593663	0.173643425675869	0.859021526516637	0.390328639710503	0.601292080863735	Cmc2	heart
366.284218531802	1.023259975607	0.153682010306314	6.6582937948786	2.7702460080155e-11	1.38451415873126e-09	Chfr	heart
1717.6957671813	0.151690127320367	0.110856813926588	1.36834283746256	0.171204787915146	0.355543093807344	Tex261	heart
444.319091809248	0.05675579195082	0.130890112711941	0.433614050556489	0.664568729925529	0.814020625828524	Fam120b	heart
259.020785398084	0.117875444335573	0.169054036443826	0.697264891245238	0.485637035431988	0.683448345686854	Tbp	heart
2974.8416280281	0.272910045827075	0.122464282303545	2.22848687546813	0.0258480655785802	0.0934723049971238	Psmb1	heart
97.3287047053338	0.0555458951106246	0.230099840310243	0.241399103257665	0.809245807701254	0.899283751412817	Dll1	heart
547.254463431809	-0.266953740050221	0.223336664654363	-1.19529742446615	0.231970845699728	0.432496613654972	Nol3	heart
202.69278250063	0.087508004150739	0.176335695573017	0.4962580257297	0.619712376495494	0.78389508559546	Fhod1	heart
30.4711330205238	-0.594031656979151	0.373107486442637	-1.59211937193461	0.111357885145579	0.264928855261775	Slc9a5	heart
47.2810008632579	-0.418516809966705	0.32162011700794	-1.30127684132511	0.193163711290977	0.384075441103774	Elmo3	heart
45.5898359019974	-1.0482904070994	0.350727996461606	-2.9888985700466	0.00279985060951434	0.0171242315459621	Stc1	heart
27.4204701331747	-0.134007051512505	0.407275803449551	-0.329032685903484	0.742130982514501	0.860950184969632	4931428F04Rik	heart
388.437171772711	0.314026257398496	0.187785466633625	1.67226070807264	0.0944729240363071	0.236641926849894	Tppp3	heart
168.619994029292	-0.361920499177795	0.208629523659447	-1.73475207549517	0.0827847280961918	0.215556265294741	Msh3	heart
325.502278696033	0.208008442337155	0.155724962032869	1.33574245016191	0.181633469179695	0.369713763885364	Tmem208	heart
487.850334202867	0.0407361976578383	0.152798609408472	0.266600578470838	0.789776710195883	0.887877577913844	E2f4	heart
2184.59805286493	-0.129444076718824	0.123444673295515	-1.04859993763317	0.294362284580753	0.503167002107216	Surf4	heart
306.327778438303	-0.178005060361182	0.150369462129289	-1.18378464510388	0.236498321971439	0.438036218854096	Surf2	heart
1032.75413476254	-0.464476893447051	0.130265817213113	-3.56560841043337	0.000363013062217181	0.00331744823904301	Dnajb9	heart
107.666925836152	-0.339524225429398	0.232971003358731	-1.45736688486762	0.145015133029607	0.317571357045308	Naf1	heart
467.816274813302	0.184691694017911	0.168044482987221	1.09906431163203	0.271740015206789	0.478845711864859	Yes1	heart
7206.65255243248	-0.261460346578857	0.101898312656258	-2.56589476079809	0.0102910045928338	0.0467799900670321	Ppp1cb	heart
1302.86988716933	-0.156701893291382	0.129421933061992	-1.21078313067943	0.225978532103662	0.425569508905779	Gorasp2	heart
241.465097616614	-0.293175538734566	0.168056683740194	-1.7445038912454	0.0810712634757921	0.212595871394139	Tsen15	heart
1075.208951854	-0.387680321038922	0.119286272275608	-3.24999946467601	0.00115405225717963	0.00839339802188787	Efr3a	heart
638.753660784638	-0.352195840937537	0.136815481553106	-2.57423967623743	0.0100460654310791	0.0459961465575983	Trappc2l	heart
287.735052354711	-0.718237845551952	0.209653288180406	-3.42583630233316	0.000612909651995517	0.00508052204849747	Acsf3	heart
379.28158159316	-0.0385442510058113	0.174418391955189	-0.220987308584486	0.825102314982679	0.908350460201289	Ddx19a	heart
79.0193256324117	-0.147698936367639	0.247057340603947	-0.59783261653582	0.54995162496749	0.735641173632983	Galns	heart
280.956700175079	0.309622909554738	0.15959832805649	1.94001349090039	0.0523780503486772	0.155832123627857	Gata2	heart
43.4261617916204	-0.848590717716367	0.315160876445302	-2.69256364332914	0.00709050013101985	0.0354628972828574	C8g	heart
188.175988916519	-0.230349043862869	0.17506563340986	-1.3157867673753	0.188245621878196	0.377837062606861	Entpd2	heart
1360.23128651841	0.0192705704559215	0.125222014698457	0.153891234718802	0.877695495456426	0.938942868120391	Rabl6	heart
4020.55439776061	2.42412942494542	0.449632573929462	5.39135633292822	6.99278539479373e-08	1.84830939450077e-06	Ptgds	heart
1715.82543992362	-0.127929726585499	0.225486428045338	-0.567350007246453	0.570476408063296	0.750594804942368	Edf1	heart
29.9155146295411	0.0301419355402553	0.461483212582556	0.0653153456472982	0.947922924374215	0.976257577004966	Clic3	heart
394.080528129858	0.279499286470911	0.153270446415622	1.82356933777694	0.0682172056396361	0.189679142805624	Npdc1	heart
1091.24512034362	-0.359487478508109	0.191774496573948	-1.87453224975351	0.0608571013496899	0.174696884244723	Fbxw5	heart
2284.42043058943	0.406053179445729	0.108860119404944	3.73004532481972	0.000191445328282072	0.00192915809385568	Slc25a13	heart
842.371216779262	0.142030117989494	0.126586730906685	1.12199846676026	0.261863091812541	0.467820330473951	Ube2i	heart
76.0857668847613	-0.252686716449894	0.266930938841483	-0.946637049817416	0.343823757799117	0.556810842897466	Tsr3	heart
67.4465170955291	0.155034934222339	0.341311539613688	0.454232911075362	0.649661197577475	0.804267817054532	Unkl	heart
428.92343804188	0.137900838874045	0.139575511856181	0.988001670494594	0.323151830075968	0.53482333449254	Lrrk1	heart
38.8075195973166	0.182464341477502	0.378676747466912	0.48184722906295	0.629914475888423	0.790521809144743	Aldh1a3	heart
519.706460151927	0.773676899735252	0.135929360805716	5.6917570652088	1.25738669991875e-08	3.89904184856622e-07	Actn1	heart
1564.25826659637	-0.228125075048813	0.169705316894463	-1.34424235624085	0.178870029026501	0.36633183368922	Sirt2	heart
2442.45145983036	-0.172202028396512	0.134772888489064	-1.27772009880522	0.201348135863473	0.394428422931978	Hnrnpl	heart
522.36611098615	0.150104380468262	0.141465113607965	1.0610699460804	0.288658114860933	0.498159792456687	Nolc1	heart
620.601976932427	-0.329003907573628	0.14784280332045	-2.22536302196943	0.0260568778254748	0.0940778092222223	Casd1	heart
295.520603133736	-0.971252984203014	0.178064272319829	-5.45450792317565	4.9108645580099e-08	1.3538159161828e-06	Cnksr3	heart
496.260060106537	0.047783226460137	0.157577666906747	0.303236032098475	0.761709991270754	0.871657395026266	Mtmr1	heart
689.221885729066	-0.201173105928632	0.127509415579288	-1.57771177143807	0.11463184075112	0.270454233997627	Hmgb3	heart
84.7549117640969	0.446959970899539	0.287152141148591	1.55652668690446	0.119582901798424	0.278048587617194	Map2	heart
71.2961173955298	0.289988139491132	0.280239895475084	1.0347853541678	0.300769164157843	0.509969084869412	Cyp2j9	heart
622.613609642333	0.483238273979744	0.191965835392293	2.51731394282851	0.0118253407836209	0.0516634484955887	Abca1	heart
142.679966111001	0.160835143895801	0.208748618233627	0.770472855134294	0.441019451047625	0.645491245450955	Nipsnap3b	heart
318.621807830295	-0.422358188557008	0.159118111910934	-2.65436903118497	0.00794568774048035	0.0386767618733906	Lage3	heart
1655.36327897682	-0.437027461483668	0.114345388827007	-3.8219946249415	0.000132376575884033	0.00141992610169949	Ubl4a	heart
1652.24212549899	0.293888980284141	0.109529728102318	2.68318917042872	0.00729237282603132	0.0361961190268057	Gdi1	heart
936.30200988023	0.142876748552468	0.144049084892857	0.991861549545697	0.321265067971388	0.532728996666546	Sash1	heart
71.5798135735732	-0.468468339132485	0.349026190452866	-1.34221543238529	0.179526154101861	0.367036741631823	Gadd45b	heart
49.7286657673848	0.137668957883856	0.310280352820349	0.443692153346124	0.65726516929132	0.808704659555485	Zdhhc12	heart
88.351615307985	-0.431485680553116	0.36274457773986	-1.18950277145853	0.234241881070118	0.435243936445688	Endog	heart
380.773208640413	-0.127333199917734	0.257701153713118	-0.494111873707347	0.621227172708204	0.784816994854697	Cybb	heart
651.392952225093	0.0474253676717764	0.138823469131704	0.341623559535048	0.732634204864689	0.855116276350012	Golga7	heart
215.834652472175	0.75353717478665	0.184575314906139	4.08254578988443	4.45450315735205e-05	0.000564844247945272	Xk	heart
464.32588059377	0.470029927096122	0.152103807939369	3.09019171488123	0.00200027336618119	0.0130644948818459	Pcolce2	heart
106.87962155993	-0.293286717498473	0.294922373170649	-0.99445394510226	0.320001916379332	0.53140987165917	Cd48	heart
1248.33743713199	-0.162536699897204	0.113323481207251	-1.434272034054	0.15149464768393	0.327602471207377	Clpx	heart
757.436920150081	-0.450524092611327	0.185032771999263	-2.4348340444963	0.014898621021068	0.0617609102125219	Trabd	heart
1465.62374297851	0.0281245129350396	0.11493129873556	0.24470717067028	0.806683175432409	0.897723674428143	Mov10l1	heart
216.35593396277	-0.269223713773565	0.22589571125501	-1.19180533476194	0.23333758351184	0.434095717130562	Dennd6b	heart
216.426300398223	0.0921758765622773	0.174840195191673	0.527200718697593	0.598054209639776	0.768709527680179	Cd83	heart
68.2081195782593	0.476483057027699	0.289602424004651	1.6453006519726	0.0999078254711251	0.246054579553796	Ace2	heart
338.393707805902	0.356852335460654	0.193978657957415	1.83964740873192	0.0658200193149561	0.184864892711423	Atf6b	heart
520.634892370798	0.158266647419017	0.173794504608931	0.910653923006059	0.362477749042397	0.574699432649302	Notch4	heart
251.087928791679	-0.104607609318245	0.216391290430427	-0.483418760108914	0.628798430429006	0.789742960605754	Ppt2	heart
45.4941466005007	0.4620298052222	0.348042035203051	1.32751150289259	0.184339537386963	0.373386081963735	Prrt1	heart
308.014279989397	0.36889768448435	0.228097822317334	1.61727841474581	0.105818196467645	0.256292869496943	Rnf5	heart
861.683260883917	-0.470602708649291	0.121211726866041	-3.88248497745918	0.000103394405773134	0.0011534859136293	Cacfd1	heart
506.080667631684	0.443528901994187	0.15780847868995	2.81055178832056	0.00494566289276759	0.0268625097567361	Hivep2	heart
849.349880033209	0.0511733050659118	0.122247997481633	0.418602399385727	0.675506735748332	0.819026835365111	Arnt	heart
23.5908906912601	0.399704395392075	0.577422182103385	0.692222099843939	0.488797862156724	0.685915667105455	Itga2	heart
548.411921554741	-0.0375553505057721	0.160451856548909	-0.23405993120637	0.814938452212666	0.902664413215588	Mocs2	heart
295.312945954873	-0.225021905748827	0.183298502667279	-1.22762544414934	0.219587605742068	0.418056991024655	Nat9	heart
55595.9071810051	-0.353555643731595	0.120011589919991	-2.94601249735381	0.00321899394053877	0.019045946801696	Lpl	heart
996.233273861259	0.788967860619303	0.128698779481944	6.13034454402103	8.76889624595537e-10	3.3989437607902e-08	Atp6v0e	heart
434.103184331288	-0.932011492451316	0.314862706266708	-2.96005679269569	0.00307582335073073	0.0183983050404954	Nkx2-5	heart
322.461272370417	0.263610667426273	0.15793450827603	1.66911380105447	0.0950948286865844	0.237502076258422	Zfp318	heart
937.910101362586	0.0686591552384203	0.219077450335922	0.313401288599726	0.753975805340744	0.866805349517115	Srf	heart
1176.56273638114	-0.545420998255726	0.191904729745981	-2.84214463592266	0.00448111569401945	0.0248473893526317	Lama5	heart
26.4876556698125	-0.063931646421944	0.522848507600118	-0.122275660143683	0.902680707726957	0.954594293615456	Steap2	heart
14253.2701732708	0.11511673484346	0.142935140583587	0.805377420650043	0.420601917386358	0.6278589223212	Hspa8	heart
136.567835083437	-0.231108648327207	0.207098510043359	-1.11593583304304	0.264449602143429	0.470362452306733	Serac1	heart
408.792284604888	-0.0277272681213801	0.1398376045622	-0.198281915713502	0.842824499959783	0.917903693921717	Pdzd11	heart
2049.93561555627	-0.138665759145876	0.122872358594642	-1.12853501578282	0.259094037507989	0.464571524744122	Psma2	heart
703.651664334915	-0.09073085664376	0.119149413847439	-0.761488065396055	0.446365604615474	0.650316317071386	Mrpl32	heart
366.797045352015	0.197433512821566	0.151440995692749	1.30369925209768	0.192336144538179	0.383215623330075	Setdb1	heart
521.297208920174	-0.333526223155196	0.138088821289826	-2.41530212250259	0.0157221626150741	0.0642832444471293	Prune1	heart
1011.14108194172	0.211774854685633	0.113650038417702	1.86339448392696	0.0624067855368425	0.177761624606405	Cers2	heart
3632.48892091518	-0.156023889559724	0.121257620631003	-1.28671409473321	0.198193958529103	0.391056886503409	Capza2	heart
1627.03435689201	0.993578305502203	0.178917132411036	5.5532876707391	2.80346143440243e-08	7.98547553465277e-07	Plekho1	heart
223.890426104023	-0.129673501523952	0.161196792325027	-0.804442195490385	0.421141640387837	0.62853385927058	Vps45	heart
298.433542988952	-0.0112779495498566	0.160404935025379	-0.0703092429673203	0.943947525891297	0.974664752781963	Prpf3	heart
1559.31400179576	0.148968530051643	0.122528812833037	1.21578367248717	0.224067340161283	0.423724849502501	Anp32e	heart
446.404229901806	0.0987279030912503	0.155784050390813	0.633748466826823	0.526244989286089	0.717839371423144	Aph1a	heart
1642.2208585527	0.31086078042623	0.121286765307707	2.56302309355492	0.0103765146357369	0.0470512348587552	Tab2	heart
428.185513417819	0.106832656284724	0.155349974235126	0.687690209224175	0.491647886851761	0.688852307271044	Ppil4	heart
933.575905842429	-0.0293126421814557	0.135136402974383	-0.216911517076656	0.828277301953189	0.90968489960954	Cnih1	heart
382.300394109979	0.23645793559551	0.143378983395155	1.64918128163754	0.0991105015471231	0.244576538815147	Eps8	heart
403.052186527059	-0.219694088568365	0.169124733473983	-1.29900626629612	0.193941778697201	0.385285618599973	Med22	heart
597.968303367907	-0.269362596405369	0.128323210179726	-2.0990949028481	0.0358085356835521	0.118155177960432	Surf1	heart
861.045656960605	0.302821181679606	0.142836554633067	2.12005380875731	0.0340015077424501	0.114263669176187	Med28	heart
573.080467597217	-0.145522502025171	0.151905076710627	-0.957983137735315	0.338071261507601	0.551224222276495	Qdpr	heart
5826.88121745972	0.231564721302103	0.176498384377761	1.31199343335904	0.189522350197139	0.379545419945657	Sqstm1	heart
1383.61231550867	0.171467769883673	0.114843809379452	1.49305191816767	0.135423597173773	0.302458595488452	Nfe2l2	heart
1044.20940644259	-1.08394608222236	0.148007078723557	-7.32360973252448	2.41388033494058e-13	1.68035629030251e-11	Rxrg	heart
1059.61006039836	-0.477665893835688	0.175252168573289	-2.72559191549138	0.00641863021660448	0.0328368169011442	Rxra	heart
537.33234634618	-0.23115693615813	0.2322895782221	-0.995124008263135	0.319675955272191	0.531197020306147	Adamtsl4	heart
280.122329079558	0.0996399430006314	0.176691502333216	0.563920401857947	0.572808304666433	0.751734550957452	Fcrls	heart
275.982661724665	-0.132778133261884	0.164483291886761	-0.807243895345281	0.419525980698295	0.627014183442604	Prpsap1	heart
161.434581072895	0.402576877601467	0.194309720858533	2.07183086786771	0.0382812169165659	0.12409335319782	Lcorl	heart
628.074786420946	0.118626366894788	0.126117434930088	0.940602438993045	0.346908631559622	0.559755477906038	Lta4h	heart
6105.46929929273	1.43766092082852	0.0988726370476226	14.5405337994178	6.7067618111603e-48	5.71919113446695e-45	Dstn	heart
386.991595422556	0.314328282485045	0.14198088534569	2.21387746470048	0.0268372093444473	0.096106793778383	H2afy	heart
88.0328354094479	-0.273108340304303	0.257765174336738	-1.05952381273787	0.289361290286327	0.498553535126486	Gtf2ird2	heart
141.864932189564	-0.84749367498329	0.292770512513961	-2.89473713628477	0.00379476161155231	0.0217819635793099	Bola1	heart
593.899025462564	0.400583082730014	0.166963265242309	2.39922884922416	0.0164296429461562	0.0666169534494368	Castor2	heart
84.2157899459979	0.0726735840157992	0.309476378878625	0.234827563509464	0.814342573266903	0.902297390746599	Fcgr1	heart
146.578866116125	0.80393725383668	0.22645233768256	3.5501389036824	0.000385027939602356	0.00348594638880859	Ncf1	heart
48.4695933719185	-0.617438699857452	0.368822661426875	-1.67408015946945	0.0941148464982668	0.236135153663544	Wnt11	heart
293.97619930974	0.147107709672634	0.216946538220047	0.678082770435467	0.497719214403151	0.694719279930086	Adss	heart
39.4675372690454	0.431145763255788	0.339396710843162	1.27032982194994	0.203967169643066	0.397561151801428	Cacna1d	heart
671.578194776485	-0.00205236022378033	0.148367707963011	-0.0138329307095045	0.988963270137011	0.994649480889679	Actr8	heart
183.518752946499	-0.837527189602918	0.360727159351335	-2.32177469284257	0.0202450706176835	0.0784280929891182	Lrrc27	heart
27.7025265418024	0.165771426539631	0.410754669308678	0.403577704469272	0.686523283580628	0.825788916615894	Stk32c	heart
1363.27831060833	0.00240270988216013	0.11838624208005	0.0202955161000505	0.983807632685409	0.992170252077739	Fnta	heart
703.297930600619	0.0391677042669535	0.16055341394068	0.243954353293445	0.807266172720949	0.898103364367632	Mtrex	heart
170.748366534916	0.571730508732896	0.183789684947084	3.11078670654182	0.00186589662087471	0.0124126248148291	Lbp	heart
92.5075702675861	-0.596479302624148	0.322749709134954	-1.84811724299568	0.0645853838628271	0.182217323702319	Celsr1	heart
556.026829681149	0.0645927798574695	0.172141683334592	0.375230325428621	0.707489178685658	0.840266569810856	Fli1	heart
496.873870649688	0.0686423554320549	0.137668609322067	0.498605715348447	0.618057177988877	0.782478624522617	Stard13	heart
142.603807515822	-0.228432472021607	0.207483691298422	-1.10096591492126	0.270911492121827	0.477829847007566	Diexf	heart
284.835225302009	0.505275276586649	0.206455211760258	2.44738445824942	0.0143897254060958	0.0601880482651045	Hsd11b1	heart
173.618536041894	-0.0118929134876414	0.21317333105613	-0.0557898749750733	0.955509200981805	0.97972847054367	H2-M3	heart
8570.85712029752	-0.854211097906184	0.177247401117387	-4.81931521997583	1.44051800159796e-06	2.77213365497921e-05	Atp5e	heart
446.442142858637	-0.121840463664798	0.172483132627392	-0.706390600685601	0.47994526448951	0.67819555918884	Nelfcd	heart
757.202644739734	0.268318818501701	0.123700426303009	2.16910180927302	0.0300749553753022	0.104599207530111	Ctsz	heart
1409.93381971917	0.366124354570284	0.131838788558471	2.77706097403881	0.00548528877382545	0.0290440868920938	Prelid3b	heart
176.140224089661	0.316611148732626	0.213094480114554	1.4857782733857	0.137337778797543	0.305682977799946	Sertad4	heart
879.062411531898	0.0228637678045419	0.155245744512374	0.147274682963819	0.882915214629399	0.942457451531848	Ube2a	heart
7489.52404817841	1.3357421547135	0.104481530629686	12.7844811103291	2.00194452544782e-37	1.01164930019297e-34	Slc25a5	heart
315.046151576492	-0.8860952843159	0.223180124892092	-3.97031449258454	7.17778241460269e-05	0.000844255717800337	Ppdpf	heart
15697.114169004	-0.863465221716551	0.239948356426671	-3.59854609789932	0.000320001135270487	0.00296811386106766	Eef1a2	heart
43.3762551787496	0.658493868350568	0.427131224946471	1.54166642448838	0.123154674954612	0.283550858096647	Col20a1	heart
1492.03583304796	0.387424842763898	0.168403515896177	2.30057454977811	0.0214156909563943	0.0814823445089359	Pls3	heart
273.732352583414	-0.86747933122583	0.210351972573044	-4.12394198454499	3.7244274177209e-05	0.000483502261535527	Mpped2	heart
271.452396940417	0.191911473996948	0.195896262543422	0.979658680085383	0.327254628821815	0.539258714449861	Nkap	heart
4870.57450937248	-0.318848685138385	0.131676504701053	-2.42145465405748	0.015458529560566	0.0634387979373738	Ndufa1	heart
117.605805214542	0.977107209606807	0.267427225022998	3.65373125164343	0.000258456793558057	0.00248676167829702	Wt1	heart
176.744944479112	0.326017193900997	0.19549656790052	1.66763640611273	0.0953879265938703	0.237968433085166	E2f3	heart
1334.52474861998	0.021049698548151	0.130546463918848	0.161242962208736	0.871902044846894	0.935458952574587	Cr1l	heart
1441.26979355959	0.0946929580522452	0.124154557722279	0.762702230103091	0.445641000288541	0.649607458112911	Ppfibp1	heart
46.4173981774457	-0.148923476725144	0.383302361810374	-0.38852741741993	0.697625768372337	0.832683578310924	Cd46	heart
3677.65146023816	0.216155647871736	0.169587234429348	1.27459857812464	0.202451361024652	0.395663344435079	Cd34	heart
670.253543228153	0.401238610256805	0.157654868489355	2.54504421018814	0.0109263903541942	0.0487347727991582	Plgrkt	heart
207.065731953124	-0.679576282237251	0.304285574014427	-2.23335031388977	0.0255258519914522	0.092577013442683	Cd274	heart
77.2537489112475	-0.479083105983921	0.251326425754103	-1.90621859419055	0.0566218507691668	0.165357134395229	Gtf3a	heart
218.666905494009	-0.547816363491358	0.173698292013084	-3.15383851586803	0.0016113822353992	0.0110038534633567	Mtif3	heart
286.229355973074	-0.176910942457862	0.213589388830469	-0.828275896225727	0.407514270217145	0.616148570793742	Lnx2	heart
4874.5119248343	-0.0863011342271459	0.141900736117694	-0.608179609128783	0.543068357035751	0.730084211586933	Mapkapk2	heart
4386.45951353465	-0.0551667903196276	0.155961727754446	-0.35372005115566	0.723548694224853	0.84994389875195	Lamp2	heart
1301.61899973866	-0.247614287059536	0.109339361355457	-2.26463996121722	0.0235347825666931	0.0873299867505171	Atxn10	heart
31.0232269488467	-0.0401653818059614	0.372041053587782	-0.107959542148981	0.914027785262256	0.962160790242201	Foxred2	heart
485.052581333049	-0.121070229563212	0.183214598108246	-0.660811042424041	0.508733500360684	0.703238322080723	Eif3d	heart
2588.76614688313	0.28417822925652	0.15654448772424	1.81531929605284	0.0694748553200967	0.192080025529362	H3f3b	heart
545.253383220786	1.16962525247389	0.125711206571834	9.30406512171647	1.35176250014266e-20	2.16981735905252e-18	Nup50	heart
32.6688552906641	-0.238894277751909	0.432254038985572	-0.552671013352598	0.58048870552976	0.75653397228031	Phf21b	heart
165.598401545823	-0.238951925846405	0.196754000549345	-1.21447048181608	0.22456811514026	0.424252677361745	Ift27	heart
3381.54280816847	-0.173777574758845	0.119010718887607	-1.46018422864044	0.144239448616408	0.316653746890149	Pacsin2	heart
119.758572998727	-0.000735842636060083	0.353882738344947	-0.00207934029080226	0.998340927680857	0.999219748920012	Cmah	heart
154.761275078313	-0.139524472834915	0.194564718722536	-0.717110860339931	0.473305695100722	0.671915815623166	Ttll12	heart
152.965610721891	0.135172113045372	0.248202633011418	0.544603864211034	0.586025996496389	0.76038064618533	Bik	heart
37.697196472604	-0.398103532178454	0.362523923664231	-1.09814416702379	0.272141541836957	0.479088284225766	Scube1	heart
716.165803560357	0.113394672387803	0.121706126200653	0.931708829519827	0.351487022147285	0.564065976261768	Tox4	heart
278.862355144847	-0.0926500179151139	0.215979937442929	-0.428975112281416	0.667941336567142	0.815787951550414	Mrps18c	heart
892.145437646956	0.982203181804768	0.216333640067721	4.54022398688111	5.61944986119322e-06	9.2598760756184e-05	Sulf1	heart
1986.53610460457	0.00898496001603992	0.101250859407221	0.0887395926182046	0.929288866280839	0.969507362864029	Srsf6	heart
1249.55348142371	0.131871603943026	0.115555326415841	1.14119883551251	0.253787188831915	0.458772541021166	Plcg1	heart
505.331849804546	-0.639777494744943	0.185209075336979	-3.45435283654918	0.000551615175997659	0.00466740358208127	Kctd2	heart
212.499770386303	0.14904446434145	0.202825029361652	0.734842562629158	0.462435382206866	0.662620075071463	Kctd5	heart
86.6726500084378	-0.17956608183683	0.296414716591696	-0.605793409657786	0.544651946537692	0.731492386904249	Etaa1	heart
428.951115674892	0.503289431025803	0.195643064114275	2.57248798113197	0.0100970461702747	0.0461521266154869	Sdc4	heart
1537.01012878595	0.629082659395848	0.168932494783122	3.72387005947833	0.000196191932400627	0.00196971502992947	Il13ra1	heart
2240.03581830066	-0.0827979608797845	0.112403139258696	-0.736616089424555	0.461355847770739	0.66197698885098	Nbr1	heart
982.139597399837	-0.0853517735265861	0.141238808851111	-0.604308222512418	0.545638740643088	0.73202507151763	Cyth1	heart
382.528278294977	0.0624753062847868	0.216779708644427	0.288197205704625	0.773195787616936	0.878684268386263	Rnd3	heart
79.0608582684619	0.0524135360401294	0.275768636331554	0.190063441359274	0.849259417423293	0.921729425375453	Cntnap1	heart
563.541841814631	0.265584943897994	0.162748483204152	1.63187354296165	0.102706128550696	0.250818403068855	Nt5c3b	heart
1169.74888350099	-0.159718791587797	0.156489860561876	-1.02063348394796	0.307428119239084	0.51758998752444	Coa3	heart
558.323865169692	-0.310919127634971	0.17690212528069	-1.75757711865607	0.0788194894408965	0.208211638708924	Med24	heart
1329.40352249367	-0.202784823738519	0.154470303973814	-1.31277545600541	0.189258622821876	0.379184236384974	Psmd3	heart
782.920644026796	-0.0478094941996633	0.117959667029012	-0.405303739861395	0.685254257815025	0.824844207642541	Exosc10	heart
827.773303007476	-0.296992841831079	0.139949470902889	-2.12214337013937	0.0338257003334684	0.113898779701343	Glod4	heart
363.490562979458	-0.113531589190529	0.163521972617269	-0.694289503565708	0.487500672228827	0.684870178324765	Vps53	heart
1511.16844827774	0.206787842595255	0.136038309050034	1.52007066273662	0.128493216977344	0.29185308014631	Taok1	heart
154.473042185275	-0.0956662118337412	0.202319117766588	-0.472848106940195	0.636321549773276	0.795267722937971	Dnttip1	heart
96.0659186228871	-0.101607212731856	0.251626897904717	-0.403801078413848	0.686359003409331	0.825664101791299	Acot8	heart
2217.01128832985	0.0544630041917958	0.127825389223998	0.426073446929673	0.670054328006526	0.817145267368703	Cd300lg	heart
93.7413688703165	0.445661851699604	0.236157925639201	1.88713485051728	0.0591421902871671	0.171287634107007	Mpp2	heart
951.123751281179	0.591466361638196	0.165820301190787	3.56691163500949	0.000361213216196492	0.00330321254811323	Vtn	heart
487.593958163922	0.570693076328716	0.154323401505964	3.69803329086588	0.000217276398319141	0.00214820230338142	Nlk	heart
109.789127063791	-0.251641224553612	0.295332197990576	-0.85206159797599	0.394179904577076	0.605075527068614	Traf4	heart
3871.91803266588	-0.261141101493603	0.143045805870676	-1.82557677873963	0.0679140362615282	0.189134251245385	Rpl19	heart
68.3276790270843	-0.160809110591103	0.25995248580425	-0.618609628192576	0.536173557494378	0.725492648819946	Nek8	heart
30.273928751309	0.226520941668915	0.467609146724392	0.484423675746501	0.628085219209689	0.789610761000369	Cacnb4	heart
142.865701456524	-0.158952465169601	0.208947607662231	-0.760728811150361	0.446819062458331	0.65040105895044	Plxdc1	heart
485.903553077936	0.099935053697192	0.182145301317647	0.548655677496248	0.583241768539533	0.758675821332195	Arl5b	heart
1804.21355477019	0.11850246092068	0.107092814806061	1.10653979107078	0.268492951137891	0.475076880472751	Zfp207	heart
1157.39137186935	-0.178650096531246	0.129066778140872	-1.38416794084885	0.166307037358402	0.34855502576314	Psmd11	heart
302.199001032296	0.217807378044453	0.176444800612381	1.234422194865	0.21704562275656	0.414932111095768	C1qtnf1	heart
2784.32952243704	0.26394112130175	0.141192520699933	1.86937041702574	0.0615712974003525	0.176001540728136	Timp2	heart
413.898612709046	0.190169922738053	0.165918220785543	1.14616659844645	0.251726225499894	0.456297677789366	Zc3h18	heart
1311.79542192138	0.0136958524387765	0.151001209631098	0.0907002829463156	0.927730745800948	0.968474238386238	Top2b	heart
144.425540674684	0.507913418397051	0.228675964943474	2.22110539042703	0.0263438240325064	0.0948878392554164	Rarb	heart
2361.80664708873	0.149256824297069	0.107327866823285	1.39066235745484	0.164327837405576	0.34639721382649	Igfbp4	heart
523.320908276385	0.514023469471292	0.14278306176322	3.60003114601723	0.000318179065835807	0.00295523156859343	Suz12	heart
28.5975510375828	0.295879327221008	0.449191299447663	0.658693362014867	0.510092696431708	0.703957344893026	Atad5	heart
252.326571388688	0.2134708515217	0.164991214151004	1.29383162988501	0.195723584667999	0.387808973164417	Crlf3	heart
23.0455918840916	0.735708810387174	0.440941533265145	1.66849515158914	0.0952174736010612	0.237634389941994	Tns4	heart
1645.11698047431	-0.00709495365179825	0.155953431052611	-0.0454940529612635	0.963713515041942	0.983316422317698	Tnfaip1	heart
843.00280854835	0.207088209463368	0.188143128782145	1.10069504426686	0.271029403839897	0.477829847007566	Abr	heart
70.1260443072083	0.540774429589207	0.300207481131828	1.80133562145222	0.0716499965436001	0.19610683106136	Cd40	heart
407.518181388255	0.131335265303331	0.199943034350629	0.65686341977293	0.511268741023567	0.705048585256271	Slc35c2	heart
113.75911578149	-0.0755623267916754	0.235889817966427	-0.320328903736023	0.748719014566002	0.865062429904186	Zfp334	heart
406.507600421291	-0.207865868688767	0.132811607692425	-1.56511823251291	0.117555189238391	0.275162635438086	Elmo2	heart
558.701376274447	-0.0782029180761759	0.185865440955079	-0.420750181821463	0.673937513239854	0.818354649350301	Wsb1	heart
342.352567157834	0.260666668819716	0.153028166669218	1.70339013067553	0.088495083421918	0.225771675057713	Ttpal	heart
1283.13115727989	-0.113048562618551	0.117805090046737	-0.959623752876049	0.337244610050838	0.55033673717661	Rhot1	heart
148.734501065038	-0.054766380577182	0.245848613117431	-0.222764651314191	0.823718680877477	0.907967174171296	Rhbdl3	heart
34.5291947198732	0.337065714196919	0.380878411842255	0.884969333301354	0.376173171449962	0.587579479251664	Ada	heart
10508.253007411	0.775110638274554	0.113459529722227	6.83160453927658	8.39700657156734e-12	4.56449233714999e-10	Serinc3	heart
73.4205226416086	-1.19007378790287	0.277250339006837	-4.29241598825791	1.76739431049703e-05	0.000253323289660782	Tha1	heart
265.975681755052	-0.421333185773179	0.195044880997309	-2.16018581784257	0.0307582876053422	0.106406205904485	Pgs1	heart
18.125642756036	0.456287565879962	0.538056559482192	0.848028999626131	0.396421820615175	0.607229678192999	Birc5	heart
39.3413931369082	0.704061395673391	0.395302640274147	1.78106929714691	0.0749011307495301	0.201415877723619	Afmid	heart
463.197504907029	0.0764544011898394	0.162086545005639	0.471688758540567	0.637148962197069	0.795648951145598	Pigt	heart
104.75878139823	0.758491077776609	0.223459763875859	3.39430716573199	0.000688024750046061	0.00556785865339766	Dbndd2	heart
54.662333395897	1.27281300333945	0.44522203308846	2.85882752592022	0.00425209903512184	0.023806171208536	Mmp9	heart
28.2100938831342	-0.13022785656436	0.417006561922414	-0.312292103903607	0.754818540370048	0.867231163692101	Slc12a5	heart
200.908739151353	0.180091726498927	0.211600367681837	0.851093636896288	0.394717339832068	0.605523204932396	Ghdc	heart
491.207008183477	0.204015489665511	0.140964020878417	1.44728767237334	0.147816370335773	0.322167519928199	Pltp	heart
1909.50891265924	-0.55174921935167	0.128989830687101	-4.27746293186542	1.8903542339193e-05	0.000269227486091805	Slc12a7	heart
2256.54182719984	0.342330277064275	0.134037869708378	2.55398177999301	0.0106498829235967	0.0477983561215638	Ctsa	heart
84.3951209714698	0.00739880088323748	0.289749426069638	0.0255351701074958	0.97962809593721	0.990958314128654	Zswim1	heart
582.352426177427	0.0524897044995338	0.175469094722405	0.299139313293736	0.764833751151239	0.873546936272184	Slc12a4	heart
2814.38683325077	0.548221026104141	0.138562640283524	3.95648513179586	7.60606199502943e-05	0.000886983844958816	Myo1c	heart
2188.40526573196	0.45404627896922	0.110243058148299	4.11859292181859	3.81192855695043e-05	0.000493517085540031	Crk	heart
8186.44964616846	-0.241308342254305	0.141938368698866	-1.7000924025431	0.0891135461343087	0.227094737291092	Cox7c	heart
1999.8969376951	0.296539832744768	0.112344525609104	2.63955747854203	0.00830143447336778	0.039952300513097	Pitpna	heart
382.058750241822	0.0040674712427375	0.161439423946898	0.0251950307012705	0.979899400625477	0.991012335789341	Mlx	heart
983.509937727535	0.291535414956159	0.121156806676809	2.40626526030718	0.0161165577582157	0.0656310912098603	Retreg3	heart
4903.01889389985	-0.120249771605637	0.17218943824217	-0.698357418627011	0.484953698938599	0.682838830579799	Jph2	heart
75.0722901478239	0.58089375514588	0.279570638078057	2.07780673657043	0.0377271631189501	0.122851888686147	Dhx58	heart
766.960827619253	0.151720683862408	0.132560363753527	1.14454034046336	0.252399617977188	0.456916025796383	Rab5a	heart
789.805643631243	-0.429056326351561	0.175524734054916	-2.44442088838217	0.0145084896499387	0.0605548586062293	Nkiras2	heart
2409.07565232444	0.193006765095308	0.103388057945043	1.86681874997499	0.0619269031976279	0.176800725513378	Ppp2r5c	heart
437.581356308702	-0.15560991282669	0.139633465194504	-1.11441703899514	0.2651003168702	0.470967281689715	Ift52	heart
28.9971721003059	1.36379170552214	0.429303953080388	3.17675086785601	0.00148934916135377	0.0103360528776759	Eya2	heart
290.597154856887	0.566245942516201	0.187751097950098	3.01593944695175	0.00256184415028424	0.0159025484924833	B4galt5	heart
17.4543986982666	0.663278969548236	0.842411175085876	0.787357752561415	0.431072470633849	0.637506709050471	Hnf4a	heart
354.380483134013	1.17435620851454	0.153480394353053	7.65150632733687	1.98638536492454e-14	1.5666035791347e-12	Ptgis	heart
41.7558978111714	0.70164940540667	0.352218475736669	1.99208574717485	0.0463616505053584	0.142468098985385	Cadps2	heart
275.454809269713	-0.177992511400183	0.15565959046923	-1.14347282338102	0.252842331940035	0.457530607027829	Ddx27	heart
1174.92122822411	0.0988375380276817	0.117921449379283	0.838164206325011	0.401938486769559	0.611376668169885	Cyth3	heart
340.988063642575	0.347944442932142	0.166258018195326	2.09279796973981	0.0363671931403375	0.119449683005962	Cyth4	heart
27.2765545158644	-0.0377939424897644	0.426977956317434	-0.0885149735029101	0.929467383916305	0.96954533533288	Rac3	heart
336.046058086533	-0.23780866287219	0.205685291300944	-1.15617729088972	0.247608646586652	0.451171524309332	Rrp7a	heart
2066.6800226073	0.196671102553107	0.118322769126021	1.6621577064651	0.0964811576045972	0.239823085144311	Cyb5r3	heart
106.493437115302	0.0144015532732843	0.217317949537396	0.0662695065177119	0.947163260114288	0.975990901064825	Ints2	heart
570.657381092364	0.164988151625707	0.136406572941551	1.20953226862757	0.226458421706186	0.426296730927043	Med13l	heart
894.782247905684	0.32255220657857	0.145630689245146	2.21486424496422	0.0267693839246085	0.0959646543004096	Hist1h2bc	heart
643.667945231336	0.5741570448063	0.207020703272753	2.77342814380183	0.00554690889470712	0.0292887093496068	Mafk	heart
660.059692754468	-0.0800037372940702	0.14276263922399	-0.560396877845241	0.575208760750026	0.753519874633519	Med1	heart
230.784636021639	0.252481248954089	0.188141689525306	1.34197396436226	0.179604437583175	0.367064551585507	Erbb3	heart
569.687350862451	0.427384063293893	0.180960956140579	2.3617473758366	0.0181890321804702	0.0721324193835395	Stard3	heart
233.311860358297	0.392373608348065	0.205427208204739	1.91003719408485	0.0561284245530275	0.164091755860619	Mfng	heart
936.192584342685	0.0876401477527427	0.143249944073833	0.611798827003883	0.540670865907227	0.728727975347051	Vmp1	heart
343.374000698835	-0.0206210092270481	0.157831238749529	-0.130652267513231	0.896050393568795	0.950556194687766	Uchl5	heart
537.521218118108	-0.0441764746961793	0.125385076744425	-0.352326415895771	0.724593479622166	0.850509181251382	Glrx2	heart
542.999936779774	0.591373669843807	0.171427901097331	3.4496932299722	0.000561223918006137	0.00472967210455573	Ro60	heart
512.463442888143	0.457764177379058	0.134829132550593	3.39514293921076	0.000685927792554422	0.00555748147364165	Stk4	heart
1195.07860864194	0.414802208226351	0.129690266278403	3.19840663551345	0.0013818927173049	0.00973891747670872	Pmp22	heart
129.291846812471	-0.0875776338792508	0.240365468610947	-0.364351977783476	0.715595190632195	0.844950191856302	Zcchc10	heart
346.537212054223	-0.855499560802222	0.266317674370988	-3.2123273936768	0.00131664238883069	0.00937592314885487	Tbx5	heart
2418.75589302542	-0.356979984649558	0.158164187225108	-2.25702158568604	0.02400672600195	0.0886942240916885	Psmb6	heart
1722.21694497112	-0.302576018394417	0.138320282348493	-2.18750289731254	0.0287058319414142	0.10120474703066	Spag7	heart
2856.16382076769	0.281268806759324	0.149683041270878	1.87909601763314	0.0602313838186494	0.173521326187004	Pfn1	heart
354.803256682409	-0.318491063220798	0.177155646304424	-1.79780362559544	0.0722081326129845	0.197155884620038	Tomm34	heart
2358.96576584008	0.322717125701936	0.120332483134057	2.68187871883614	0.00732099958740239	0.0362964092916127	Ywhab	heart
235.440488309469	0.282230609386266	0.194494968642294	1.45109465482026	0.146753504728019	0.320471321784426	Ksr1	heart
13473.478714206	2.48426639322724	0.17861845062409	13.9082294384889	5.64598428761264e-44	4.05441103264141e-41	Gpx3	heart
3517.72980702067	0.059346141492509	0.141600180823763	0.419110633526462	0.675135279719446	0.818890261918881	Anxa6	heart
118.282580120855	-0.205623084415433	0.212808518745715	-0.966235212891698	0.333926496447707	0.546753044225671	Zkscan6	heart
609.947759178482	0.583867017243912	0.132164007911791	4.41774599960374	9.97355274882483e-06	0.000153642101508143	Kpna2	heart
1052.98442092263	0.45414840201671	0.12279598626028	3.69839777217222	0.00021696469862607	0.00214707263094681	Smurf2	heart
160.00918557462	-0.133703005574263	0.189994501368677	-0.703720395122475	0.481606916558546	0.679718754499155	Cep95	heart
1391.80369999443	0.334148082912734	0.112796398350681	2.9624002875861	0.00305250660440861	0.0183069890595829	Vezf1	heart
1036.25767924209	0.353422075805072	0.182325640844072	1.93841126332486	0.0525730673606284	0.156276019840613	Cuedc1	heart
2086.98276094269	0.123208260580088	0.109733112343002	1.12279928956144	0.261522747178408	0.467533590474607	Srsf1	heart
42.0182830028895	0.46658784557222	0.322067221173781	1.44872813778357	0.14741351930719	0.321552367294532	Abi3	heart
233.903846482121	0.328304816461011	0.164855527062358	1.99146987857329	0.0464292535416733	0.142579503786313	Kif3a	heart
1287.05009458033	0.242215162733609	0.112773380517996	2.14780439870699	0.0317292974464524	0.108717863977749	Sept8	heart
438.583011470718	0.405613375940856	0.144291784603007	2.81106354777458	0.00493780323120315	0.0268305007114838	Mtmr4	heart
283.107043312682	-0.327371318529952	0.212903433951659	-1.53765165950439	0.124133809118768	0.285131597915232	Mrm1	heart
990.838903986134	0.107418181448607	0.154599457297356	0.694816031870017	0.487170599850953	0.684711142842026	Mapt	heart
575.512633996884	-0.0859040811733882	0.128564572213124	-0.668178485679423	0.504019666914227	0.700193568916698	Kansl1	heart
1458.18901309207	-0.271048149786421	0.158592360732117	-1.70908704892953	0.0874348262002042	0.223862032027695	Gid4	heart
715.995077231044	0.234981612689547	0.232072766959613	1.01253419678682	0.311282704588683	0.521824205566358	Myo1b	heart
437.659197222466	-0.456375199437726	0.149055322848184	-3.06178397870804	0.00220022176237676	0.0141565248472236	Dhx40	heart
421.105494072345	0.0543795304868879	0.140938117191754	0.385839768335359	0.699615340669216	0.834182618901581	Ypel2	heart
2032.03190718385	-0.117999284623373	0.165465925046065	-0.713133441767677	0.475763187521102	0.674380824182575	Akap1	heart
389.650191390448	0.00544558905911947	0.140598083371674	0.038731602369884	0.96910437725822	0.985867888704978	Nol11	heart
606.856713420882	-0.136075783179381	0.130965755045672	-1.03901804812966	0.298796342571596	0.507592520409368	Derl2	heart
1669.08788585404	-0.620705033460884	0.128073252000234	-4.84648452168412	1.25668387577043e-06	2.4625415321005e-05	C1qbp	heart
220.325761344976	-0.102756728390537	0.171641615901706	-0.598670245853327	0.549392802461657	0.735398351494835	Rpain	heart
674.744153059278	0.112287554518818	0.125043712818984	0.897986408012116	0.369192795780797	0.581258732921167	Chd3	heart
459.152031104921	0.418286960127626	0.240960204684807	1.73591718464373	0.0825784787875184	0.215224596862827	Kdm6b	heart
707.08804958817	0.490790193269468	0.147193525622454	3.3343191637948	0.000855084806460467	0.00657591026324589	Appbp2	heart
47.8566356925467	2.53272454238301	0.637471922151187	3.97307623186945	7.09503295867106e-05	0.000835963986943937	Wnt9b	heart
1888.06628774334	0.0489623946678416	0.104002510043075	0.470780894110756	0.637797209686095	0.796021379473039	Ncor1	heart
77.2683705029915	-0.0376055924405817	0.265131938702841	-0.141837277789191	0.88720853830524	0.945191949452385	Trpv2	heart
231.868632824389	-0.825443121335836	0.180993466609505	-4.56062385454353	5.10018693153351e-06	8.53827613421389e-05	Cenpv	heart
113.53172209968	0.218269235865532	0.231936786987346	0.941072085634437	0.346667919401667	0.559586697264334	Pcgf2	heart
199.305505963101	0.100518095149622	0.177375780405966	0.56669571753011	0.570920930894193	0.750809174083892	Cwc25	heart
686.003405124031	-0.24328522977357	0.148549178267841	-1.63774200982058	0.101475523164949	0.248717551676814	Pip4k2b	heart
374.672957715783	0.544074216005732	0.167747996407911	3.24340217264184	0.00118111363106065	0.00854913229824483	Trim37	heart
285.347344608009	0.207322567400016	0.232128143823432	0.893138436318672	0.371783041743325	0.583598960073452	Ybx2	heart
1387.55446632636	-0.243405345024768	0.129947195560492	-1.87310964253522	0.0610532461034633	0.175038976641238	Ctdnep1	heart
730.675456622969	0.0461721434991639	0.142601847859542	0.323783626875873	0.746101852882998	0.863501033228911	Elp5	heart
5170.7004697615	-0.139611336817943	0.131590585369936	-1.0609523198446	0.288711570302524	0.498189030632052	Slc2a4	heart
6586.0381521413	0.0996229854428939	0.124540181774563	0.799926449627537	0.423753412263695	0.630913526508714	Gabarap	heart
476.72288305587	0.25572322193494	0.152097594557559	1.68131010012894	0.0927026970796894	0.233560750207308	Phf23	heart
5649.88152940753	-0.755818380495106	0.191192348351479	-3.9531832053532	7.71183445485992e-05	0.000897018493624115	Acadvl	heart
1476.19657377789	-0.29635713101714	0.114118437196277	-2.59692595077711	0.00940621996377663	0.0437865797290237	G3bp1	heart
650.96958336909	-0.231128573265316	0.16628273491997	-1.38997336901246	0.164536964313324	0.346641323813332	Atox1	heart
11974.77564682	0.490366200498322	0.143990089039403	3.40555522793054	0.000660296565614618	0.00538177200791269	Sparc	heart
323.32189409192	-0.715849455048451	0.227910655835548	-3.140921394939	0.00168417227916599	0.0114152243303233	Mief2	heart
168.410449876552	0.629975887675421	0.213443095710081	2.95149339724305	0.00316241307366928	0.0187518313677287	Tbx3	heart
125.753829603994	-0.177218608499828	0.204658993256558	-0.865921431938581	0.386533249159478	0.5978063279668	Tada2a	heart
81.441366918294	0.228461280413888	0.298538905341251	0.765264681843531	0.444113950418956	0.648490019211926	Ikzf1	heart
206.468000779666	-0.716301735798773	0.201852409206854	-3.54864100266805	0.000387224615572584	0.00350118797539585	Pnpo	heart
305.928243307318	0.103455053132746	0.160790324304617	0.643415911872598	0.519954261338394	0.712560861962741	Cog1	heart
555.035064577693	-0.124465825776653	0.156163156674997	-0.797024268891337	0.425436936747464	0.632384961867567	Cbx1	heart
353.6726600844	-0.514586640106992	0.157728963299301	-3.2624739891971	0.00110444307674774	0.00809727100437733	Cdk5rap3	heart
630.289184962271	-0.528701337487574	0.139270831048168	-3.79621011455526	0.000146924984620116	0.00154918430460345	Copz2	heart
3168.145068751	0.782053018183593	0.212515730636134	3.67997708142656	0.000233254916521033	0.00227811745240728	Slc25a39	heart
216.636027198723	-0.033942052733804	0.215653608729173	-0.157391536055536	0.874936283572103	0.93701967449433	Sp2	heart
175.947862078522	-0.0881306453860319	0.188349580347952	-0.467909964138076	0.639848977609666	0.797560702585994	Aatf	heart
3393.32055227878	0.212175194110851	0.119333289193369	1.77800507758602	0.0754030209547065	0.202161292573397	Dync1h1	heart
195.425590299064	-0.37784797579338	0.206167610278917	-1.8327222946524	0.0668438800403198	0.187042227085751	Pex12	heart
1117.64655585229	0.731987571652553	0.12085865711497	6.05655886906167	1.39064262728199e-09	5.22681255747963e-08	Ndel1	heart
92.3143047458989	-0.242563329720572	0.254899601930377	-0.951603407316522	0.341298152856812	0.554409948223297	Slc25a35	heart
1400.60859188242	0.22980799122571	0.132825986482835	1.73014330486759	0.0836046748012438	0.217152519129673	Zbtb4	heart
309.031331489065	0.456592890121476	0.171399000265176	2.6639180474511	0.0077236376584811	0.0378117374281723	Mpdu1	heart
1607.16862723807	-0.181569606012564	0.150440880427814	-1.20691666717336	0.227464238225517	0.427411176154903	Fxr2	heart
22635.5405683639	-0.419303991091048	0.162138875264863	-2.58607931260218	0.00970745902925048	0.0448066884286514	Atp5g3	heart
247.994485920181	0.131744567788499	0.174222536512137	0.756185568331	0.449537944175006	0.652638402886123	Cd68	heart
9165.92751473678	-0.837197102699367	0.138354905836715	-6.05108360730929	1.43874749173555e-09	5.36346196099448e-08	Acsl1	heart
192.736852806912	0.266479791312958	0.218755311236598	1.21816375477504	0.223161750227503	0.422422158726977	Abca5	heart
150.258967391559	0.437252982068118	0.207827301765516	2.10392464490279	0.0353850208060481	0.117182821329544	Smyd4	heart
1205.25800939824	0.772416011713039	0.176752836368064	4.37003460642966	1.24226847483017e-05	0.000186053908568418	Lsp1	heart
364.771383169203	0.0169990516991371	0.162602673406859	0.104543494537772	0.916738053708341	0.963499488383139	Zfyve27	heart
176.300071354054	-0.196943762670117	0.256024981510192	-0.769236507736169	0.441752921395413	0.64614889145787	Avpi1	heart
441.08297361297	0.685446096498106	0.257452556627585	2.66241712833184	0.00775816706639454	0.0379263459168352	Myh11	heart
198.873636524535	-0.670339777403044	0.192586528280578	-3.48071998279355	0.000500067989647195	0.00430197203704056	Rad51d	heart
2410.82039020091	-0.246184728615222	0.162702314919597	-1.51309911439724	0.130254484549741	0.294339153586373	Unc45b	heart
843.152515846899	0.518539226811359	0.151064366461272	3.43257141944387	0.000597886388480862	0.00498933448589167	Pank3	heart
663.581923217222	0.0363765237972541	0.164166835647688	0.221582657993848	0.824638783833412	0.908335851365985	Rars	heart
16.2387887069631	1.09872296662295	0.538224494836976	2.04138417549305	0.0412126561157044	0.13086001397316	Wwc1	heart
701.807277297275	-0.139254031317351	0.152267533177384	-0.914535281497776	0.360435647781731	0.572967386606209	Mrpl58	heart
94.2073376880653	-0.497866227772995	0.315796983587392	-1.57653889570867	0.114901662209284	0.270915829774795	Fdxr	heart
1071.82121404744	-0.324327734396876	0.122348053607272	-2.65086141409281	0.00802867774532104	0.0389713643254405	Mrpl45	heart
137840.650005048	-0.548547374378318	0.128506940719083	-4.26862059985884	1.96685479034246e-05	0.000278668398332633	Mb	heart
651.917224638568	0.191751873202317	0.232330681598455	0.825340294631116	0.409178421286753	0.617706393011336	Irf1	heart
428.25217043909	-0.0633789839253872	0.173247792402668	-0.365828522525007	0.714493035088597	0.844468379309496	Slc22a5	heart
982.002819670265	1.30138983306374	0.129141328665924	10.0772529329499	6.9646056240969e-24	1.50833458944727e-21	P4ha2	heart
990.100946928807	0.447676971670006	0.133169097282139	3.36171815238437	0.000774591432985183	0.00610544512515877	Arrb1	heart
20.2515347413315	0.577623216139181	0.468129526318796	1.23389614126971	0.217241607600037	0.415177977589456	Tm4sf5	heart
278.605972000753	0.402463328488961	0.196644610396118	2.0466532374228	0.040692143715601	0.129659880629533	Cxcl16	heart
238.802714751766	-0.244046866486796	0.195967948939362	-1.245340719274	0.213006533898825	0.409935520297617	Pelp1	heart
136.92095316795	-0.110407180579414	0.206789924946138	-0.533909863394801	0.593403897624925	0.765225094540823	Med11	heart
514.753604397928	0.169290061461389	0.225196196879857	0.751744762153804	0.452204566137924	0.655338511923892	Ccl6	heart
290.035654445183	0.249291291188865	0.164722376847729	1.51340270799585	0.130177397565283	0.294339153586373	Natd1	heart
1004.88738678078	-0.222069208509816	0.140106618337333	-1.58500155913508	0.11296598002604	0.267561669329049	Map2k3	heart
935.332859619738	0.0876915103751686	0.138173354919438	0.634648485059198	0.525657698663715	0.71727909196597	Ywhah	heart
283.860701783311	0.138838026381084	0.174891758698906	0.793851164937437	0.42728208234054	0.63409144349079	Sart3	heart
136.976001659554	0.599824732022618	0.209304170700567	2.86580401152509	0.00415951673053646	0.0234417374107557	Slfn3	heart
226.24814119658	-0.542476038109257	0.16957875556235	-3.19896225391158	0.00137923225634227	0.00972657916696816	Nars2	heart
258.618982006004	0.358037343172336	0.184003186850498	1.94582142462152	0.0516761941285119	0.15416230249113	Slc35b4	heart
263.278591416425	-0.27156309715214	0.197233768181476	-1.37685904222178	0.168555832340385	0.351415799851823	Dalrd3	heart
1950.90682146781	-0.0860328101581799	0.159714062226023	-0.53866772254799	0.590116149236653	0.763120210218229	Fis1	heart
1615.62920726643	0.130456521888415	0.144448150053484	0.903137366869094	0.366452994301302	0.578596971978785	Plod1	heart
432.561944742588	0.0502889035406925	0.148309695428032	0.33908035071851	0.734549200378011	0.855649686726367	Rab3d	heart
73.7507951297656	-0.824787791565476	0.310543447239097	-2.65594975163152	0.00790853975358128	0.0385371844278082	Mfsd3	heart
565.619335551338	-0.256645922554658	0.270114363604358	-0.950138004991738	0.342042134377725	0.555441904481038	Slc25a22	heart
2183.92553957611	-0.247974776453067	0.116104041470779	-2.13579797319525	0.0326958844161039	0.11106742872435	Atp6ap1	heart
282.906570424644	-0.383146070983465	0.16188378121988	-2.366797143582	0.0179427644214736	0.0713526895268393	Dnase1l1	heart
396.269186051961	0.421581067341561	0.23488108821149	1.79487020667225	0.0726743817767201	0.197799574099655	Ccl9	heart
367.491204993511	0.518587590791433	0.187093421479299	2.77181093109044	0.00557454047201958	0.0293930140315664	Scrn1	heart
3368.75062150256	0.0140381697424198	0.113545433140145	0.123634824881886	0.901604417746818	0.953825748293214	BC005537	heart
330.324284315871	0.322459947479472	0.201270359402085	1.60212337493412	0.109128329984498	0.261310448281589	Isyna1	heart
371.51520090121	-0.409026384092428	0.140793862558761	-2.90514356704803	0.00367084680368862	0.0212360238861135	Hars2	heart
389.40747806198	-0.215421364350436	0.245994563531802	-0.875715955903984	0.381184468969983	0.592760530502216	Tmem160	heart
1569.53238911572	0.570727648493209	0.130461242707562	4.37469118527819	1.21604505598487e-05	0.000182929644364471	Rab5c	heart
18559.6607086808	-0.213919507214831	0.170123213817707	-1.25743866703607	0.20859483502015	0.404213595940198	Mdh2	heart
525.436049225683	-0.158524143328351	0.153093904002627	-1.03546999053359	0.300449474136129	0.509803833492519	H13	heart
409.80495047286	0.431711327831903	0.14235335995038	3.03267395994294	0.00242397339443646	0.0152408723473231	Rnf145	heart
307.663275974972	0.56477907751118	0.201132749697444	2.80799162921382	0.00498515225990753	0.0270124771382757	Scn1b	heart
2134.15576776003	-0.0453402226372058	0.103705968039576	-0.437199743604951	0.66196649567144	0.811999538518486	Atp6v1e1	heart
18.7015519424114	-0.275259315481928	0.472027636879337	-0.583142371285119	0.559797462060239	0.743048896988289	Chtf18	heart
109.393540156967	0.809471293136206	0.244009897813333	3.31737073122931	0.000908689540723002	0.00690320717907831	Rps6kl1	heart
1103.26745956922	0.254948767515368	0.152451292649338	1.67232932620513	0.0944593998432845	0.236641926849894	Ppp1r12c	heart
198.184521852858	-0.203266603909257	0.218845504429143	-0.928813248595057	0.352985877255802	0.565530978398102	Ahr	heart
124.734168926899	-0.399869392872701	0.274039971375813	-1.45916448197379	0.14451984200993	0.316925617902039	Map1s	heart
1464.72135872349	0.599558467063453	0.176795665705403	3.39125093746646	0.000695743672172231	0.00561367632354697	Dpep1	heart
497.534986489972	0.178911157001468	0.149407283463282	1.19747279285375	0.231122325940983	0.431681453133302	Tmem129	heart
244.109750806037	0.0962515755384169	0.175025739417198	0.549928118338	0.582368677299796	0.757973693892819	Nop9	heart
1035.28213595962	0.34807695721768	0.161103574785325	2.16057873130067	0.0307278958227005	0.106328027036501	Atp6v0a1	heart
56.5990733914589	-0.13544506077376	0.29987426758947	-0.451672835627182	0.651504690330454	0.805240505564917	Psmc3ip	heart
267.964801607459	0.147433094906717	0.178613085707452	0.82543277455156	0.409125934118464	0.617695501284976	Aoc3	heart
229.17076176896	-0.411736442540493	0.210368804807983	-1.95721244371907	0.0503224964015019	0.151433643780788	Zfp687	heart
1364.45383108066	-0.238748575354643	0.19486824043483	-1.22517951012386	0.220507592796351	0.419232669218511	D8Ertd738e	heart
3061.63150655815	0.0516520555452105	0.161452328268803	0.319921404039554	0.749027911839034	0.865130225023161	Calm3	heart
1104.0777606357	-0.00185076014706229	0.12352879281656	-0.0149824191175467	0.988046206321392	0.994189095518945	Cops3	heart
1875.32519185929	0.0391846060666876	0.239868191426874	0.163358909047486	0.870235854053419	0.934112028377378	Fkbp8	heart
1620.14539830277	-0.285928575834598	0.135306410018401	-2.1131931280692	0.0345842412406867	0.115483942116478	Ddx39b	heart
420.889126035387	0.195462856914721	0.21269542993645	0.918980050361791	0.358106007021549	0.570394391758349	Gipc1	heart
106.714375506906	0.121817781865902	0.229852304083382	0.529982861610605	0.596123813496518	0.767023133850102	Tlcd1	heart
434.732521105222	0.0485128849342732	0.137132285587905	0.35376705584897	0.723513464546907	0.84994389875195	Plscr3	heart
394.205324390614	-0.0171823898104859	0.138883102408759	-0.123718361071133	0.9015382733198	0.953825748293214	Arhgef25	heart
378.718830663033	0.0874000198438076	0.152213859199406	0.574192260175928	0.565837706267593	0.747060221209261	Xab2	heart
2237.79917925511	-0.362098519792305	0.162105909779975	-2.23371572500828	0.0255017836614894	0.0925750545284247	Cdc37	heart
82.9193077313406	-0.109947473671318	0.429247752492699	-0.256139893646125	0.79784281852404	0.892587545690211	Rab4a	heart
1371.8278465804	-0.440877780954895	0.171511070460589	-2.5705499929009	0.0101537170387453	0.0463645633455959	Trip10	heart
2358.24058762461	-0.065988481634873	0.13688674748022	-0.482066254400619	0.629758881131453	0.790399243322376	Cops6	heart
3017.58114426371	-0.067974045200626	0.145706622686769	-0.466513079139527	0.64084828788505	0.798383776324086	Ubb	heart
97.44609138194	0.0871794967449263	0.24752427291894	0.352205849215749	0.724683890617863	0.850509181251382	Ap4m1	heart
3643.18813256218	0.0108306174669046	0.124043576561865	0.0873130053735831	0.930422716708132	0.970047331285703	Gyg	heart
433.768662835254	0.263543549061953	0.161852263489603	1.62829696279707	0.103461933187869	0.252025846690268	Rcn3	heart
3507.99105618008	0.84250005196522	0.124150995452697	6.78609179808165	1.15211859044389e-11	6.04596386462169e-10	Slc6a8	heart
54.9005535120512	-0.176868047623849	0.298424175587596	-0.592673322379449	0.553399798435048	0.73850290515938	Arid3a	heart
4399.65728598705	-1.70976153633696	0.634628128600861	-2.69411559192374	0.00705756839856585	0.0353630052258658	Pdk4	heart
229.352272997417	-0.0855033532382748	0.244994175461217	-0.349001575557089	0.727088126728746	0.852047616687023	Ubxn6	heart
518.331966474762	-0.0528236789478509	0.137279796639929	-0.38478844113094	0.700394163647401	0.834673593222564	Mydgf	heart
220.247288961073	0.825012767039676	0.189054962218	4.36387787636248	1.27776926833082e-05	0.000191161007643703	Cyb561	heart
393.503099283137	0.0493065304753903	0.147823074342732	0.333550974329432	0.738718418200088	0.859030342625074	Sema6a	heart
637.159670124157	0.0104069666878474	0.151319361818068	0.0687748518286758	0.945168836011472	0.975288129208427	Ccdc12	heart
930.612473677142	-0.469494287170107	0.171797224708845	-2.73283976482033	0.00627908715059593	0.0322802807395369	Fmc1	heart
741.299166036237	0.670076161635721	0.13921977530134	4.81308176360252	1.4862044699988e-06	2.8440075439921e-05	Akt3	heart
766.465120576568	-0.267838981846357	0.134469559783438	-1.99181868578814	0.046390955277795	0.142507849219786	Mrpl24	heart
614.88846943211	-0.283303922672779	0.14048092523949	-2.01667181640359	0.0437297729652243	0.136595472146868	Gle1	heart
90.5649720529684	-1.09683638574465	0.258647809766418	-4.24065599757135	2.22867479425921e-05	0.000310286111151762	L3hypdh	heart
287.834906221336	0.451199317065953	0.171009074541669	2.63845248139748	0.00832853717294923	0.0400295677539986	Lyst	heart
1644.21743083646	0.204998115730042	0.10515090925671	1.94956103736174	0.0512284611390244	0.153353360162454	Slc35e1	heart
446.926388599944	-0.106930249523296	0.269149411465735	-0.397289553564226	0.691153949904135	0.828440138307834	Calr3	heart
443.089852586573	-0.317601793075728	0.199895260590755	-1.5888410367365	0.112096285898697	0.266128714947245	Polr2i	heart
45.8977044416037	-0.235237107742434	0.347111803776686	-0.677698381855587	0.497962952626714	0.694789246293026	Krt10	heart
765.850076847749	0.213426327220172	0.135435178930719	1.57585591059284	0.115059013781665	0.271203560302433	Rmnd1	heart
32.5373205885243	0.885584819547604	0.392437256109606	2.25662779402439	0.0240313421296413	0.0887611348177657	Esr1	heart
29.4307492572826	0.299025756863713	0.421432273971785	0.709546409546538	0.477985462238711	0.676506705639974	Fbxo5	heart
178.64256312596	-0.0524678046352961	0.202931337676814	-0.258549543091544	0.795982818411933	0.891438034508119	Mtrf1l	heart
45.1076698498284	0.525769239955897	0.322327946254458	1.6311624420578	0.102856047909322	0.250959928053431	Rgs17	heart
1011.77511440645	-0.203645590566666	0.133070105458814	-1.53036318611542	0.125926856048772	0.287826192912577	Hdac2	heart
64.9818389840221	0.517778597866582	0.285735809919854	1.81208857934822	0.0699725107540316	0.192877155616595	Frk	heart
918.285542383326	-0.209957706963478	0.149042925791314	-1.40870628947164	0.158922034398115	0.338748982553957	Rwdd1	heart
7347.79884825118	-0.101163638092926	0.142588557017407	-0.709479359417152	0.478027055780929	0.676506705639974	Trdn	heart
100.587781624913	0.143641260368311	0.291669078487962	0.492480248893574	0.622379881216708	0.785733520614395	Hey2	heart
372.579023606197	0.386363872099292	0.153790058241533	2.51228120020927	0.0119953463568544	0.0522055839530849	Stxbp5	heart
734.356774375083	-0.463213844958054	0.15657362611857	-2.95844106342195	0.00309199361599939	0.0184626524712016	Hint3	heart
187.821839708814	-0.36192126007621	0.207785149752987	-1.74180522769052	0.0815425316512566	0.213449743663231	Trmt11	heart
229.817485163541	-0.195138128450854	0.15995663917592	-1.21994391390183	0.222486137095428	0.421552680812389	Katna1	heart
1555.91926403864	0.0612599920394351	0.108599304122834	0.564091939025184	0.572691563745548	0.751688667219265	Pcmt1	heart
54.8598317990387	0.955490214151325	0.305895472153321	3.1235840381201	0.00178662836349082	0.0119669893919827	Lrp11	heart
1129.90778225811	-0.0319555882237071	0.108292286390645	-0.29508646727093	0.76792782724119	0.875460913496677	1700021F05Rik	heart
1234.35759847047	0.318814570911414	0.164131139175022	1.94243805601961	0.0520840920168944	0.155194442340796	Sec63	heart
2200.78581363765	-0.0190697187948485	0.127904820464857	-0.14909304219764	0.881480216050861	0.941515270690305	Snx3	heart
669.292577172466	-0.49126169718969	0.127566305631566	-3.85103021332718	0.000117621985272218	0.00128592497360108	Aig1	heart
50.1888166232692	-0.52231600545759	0.294837626889841	-1.77153781546594	0.0764713100621603	0.203943423473048	Adat2	heart
424.614559582966	-0.00403990702346223	0.133277840018057	-0.0303119184923382	0.975818291358978	0.988790550857921	Pex3	heart
5189.98472868039	1.43245497418181	0.111410731092967	12.8574236981399	7.81377720001358e-38	4.10042985065328e-35	Fuca2	heart
63.3735313756072	-0.314139569413314	0.286035072148711	-1.09825542390127	0.272092970722996	0.479088284225766	Cep57l1	heart
356.959214018965	-0.152719249523478	0.164963652872943	-0.925775144183453	0.35456284696866	0.566602891079924	Ltv1	heart
242.093513210302	0.656836247890078	0.271686899043515	2.4176220870513	0.0156222923130406	0.0639515620519429	Plagl1	heart
3299.25278776497	0.198528107275102	0.100613265308185	1.97318024285364	0.0484750306085831	0.147267384161778	Cd164	heart
1910.22497239213	0.303241464857007	0.139150861062579	2.17922808771289	0.029314728347801	0.102715150456677	Utrn	heart
391.4296395888	-0.229676252882588	0.186490463558643	-1.23157103317707	0.218109367032124	0.416091191804572	Smpd2	heart
205.309507793575	0.24606623665208	0.177681347719937	1.38487376311402	0.166091070896133	0.348423519573622	Mical1	heart
150.237205635868	-0.00383370182582211	0.205563952838288	-0.0186496794447127	0.985120571249174	0.992943384084175	Zbtb24	heart
365.13276728061	0.0267258057098359	0.162129995878762	0.164841833030212	0.869068476419138	0.933625963686647	Grm1	heart
63.4129661642967	0.308026374228488	0.270027042855769	1.14072416958999	0.253984725318724	0.458898368182882	Rab32	heart
623.241035303245	-0.103278612456496	0.13889048851057	-0.743597445469684	0.457120049139881	0.658461354567624	Gtf3c6	heart
343.974381913336	0.111726165113658	0.179024289107154	0.624083836170326	0.532572528617961	0.723020602385075	Slc16a10	heart
430.512820704721	0.775156604190783	0.178649948812331	4.3389690808424	1.43152659167803e-05	0.000210471431216111	Rev3l	heart
95.1295029266907	-0.16023279435419	0.23117941859119	-0.693110119104244	0.488240447787938	0.685556516375284	Traf3ip2	heart
918.759535300024	0.137264623045556	0.147472055546943	0.93078395453613	0.35196533130501	0.564700726755122	Fyn	heart
18.5283951780123	-0.322847305950206	0.481149741808202	-0.670991331590282	0.50222605172647	0.698508893960851	Tube1	heart
1987.25634639977	0.230661062596618	0.132849759098279	1.73625503096306	0.0825187507060805	0.215151124523937	Lama4	heart
356.155366107852	0.248133041979085	0.164490543305921	1.50849426959217	0.131428072201309	0.295810725357086	Popdc3	heart
669.744018240463	0.0162231634297563	0.124897448832589	0.129891871942889	0.896651975057924	0.950724242127006	Prep	heart
103.174378411125	0.0938479072866186	0.27259547257317	0.344275370389463	0.730639205027028	0.853999785816471	Tnfaip3	heart
2631.06305084797	0.184038967223234	0.116796309127988	1.57572588207013	0.115088989989827	0.27120452148898	Perp	heart
32.4505886704267	0.17308906814979	0.390577501242845	0.443161901540691	0.657648633723772	0.80901532069436	Hebp2	heart
438.633644662986	-0.165920497790081	0.145428252976723	-1.14090965403151	0.253907521568029	0.458849566129032	Reps1	heart
35.6588234418541	-0.764309273916239	0.345895510844148	-2.20965363803353	0.0271292096657442	0.0968727915936702	Fam184a	heart
256.410757677224	-0.0578104435156087	0.15506599741898	-0.372811863837614	0.70928847235137	0.841451344818893	Asf1a	heart
440.981217531931	0.161294361933116	0.181236034171117	0.889968502515493	0.373482799037007	0.585185956598636	Gopc	heart
410.714879474533	-0.311170859107133	0.147390584875422	-2.11119902516258	0.03475520859796	0.115799771943972	Qrsl1	heart
956.531938348267	-0.249543044269706	0.116560323404172	-2.14089183164341	0.0322827620165167	0.11025431913726	Rtn4ip1	heart
148.599533393547	0.275209358121861	0.219865083479408	1.25171925331034	0.210672181920065	0.406737123265511	Crybg1	heart
284.814438556429	-0.0278207150119553	0.153723825422223	-0.180978549912755	0.856384412676727	0.92599676737519	Vta1	heart
1896.86904646294	-0.12168055620212	0.142461106922297	-0.854131761509393	0.393031987305686	0.603964689104151	Smpdl3a	heart
1087.609783536	0.378444298888706	0.144204354617833	2.62436110124172	0.00868116929418633	0.0412559644200203	Reep3	heart
30.1347829887336	-1.06288786487373	0.41017384861525	-2.59131065635229	0.00956111389833677	0.0443562863070068	Pkib	heart
4868.82082311862	-0.0765344968472453	0.133682108194386	-0.572511145141106	0.566975737482899	0.74777028975335	Serinc1	heart
333.857341637996	-0.361825324685914	0.167826318489831	-2.15595103284016	0.0310874889504783	0.107226261810509	Hsf2	heart
90.6736714137238	0.570728117641814	0.233161215919903	2.44778324469656	0.0143738097803359	0.060179467459849	Echdc1	heart
509.830256310005	0.335129461435341	0.14769195319062	2.26911117495212	0.0232615659757399	0.086743874549825	Ptprk	heart
32.4163631502942	0.88440980480993	0.467585972937282	1.89143784458341	0.0585659207302816	0.169871050689618	Nts	heart
137.344521753906	0.0611843022177373	0.197025476255302	0.310540054923942	0.756150304521746	0.867888787233771	Dcbld1	heart
372.144409941893	-0.0360182424640544	0.163260544963183	-0.220618168781544	0.825389752975347	0.908350460201289	Ccdc59	heart
1789.16231185704	0.0345234472119128	0.148724327429954	0.232130464521163	0.816436683770068	0.903957000191415	Lama2	heart
25.4453478823771	0.777182944160229	0.47622070710234	1.63198057658844	0.102683578016883	0.250818403068855	Lin7a	heart
1060.82513154328	0.319357612805292	0.137590044637502	2.32108081399842	0.0202824826621578	0.0784640893769128	Ppp1r12a	heart
942.591171308732	0.648596856217893	0.158214984930082	4.09946539832821	4.14105573539471e-05	0.000530521731959864	P4ha1	heart
332.295298602349	-0.36440875912735	0.162950884621299	-2.23631040711588	0.0253314452095572	0.0920555930655887	Sept10	heart
2640.66097573182	0.0134646900051233	0.118776615319966	0.113361455610193	0.909743996645597	0.959219777015516	Lims1	heart
2057.84693556438	1.16771104598774	0.100765340203738	11.5884196255055	4.71756524281028e-31	1.65042205571547e-28	Zwint	heart
686.539212683555	-0.135546898204588	0.143861817246183	-0.942202043594612	0.346089207850903	0.558953734838746	Ube2d1	heart
19618.0907991738	-0.0544471049001154	0.128613468684327	-0.423339059719725	0.67204790009134	0.817722337816266	Dcn	heart
31.4970391660557	0.218692565227941	0.493629926531189	0.443029389981936	0.657744476744146	0.80901532069436	Cdk1	heart
1135.16899103941	0.411722695419814	0.137911799224424	2.98540587342941	0.00283202281393986	0.0172480550796844	Atp2b1	heart
1085.72428949048	0.148882706781551	0.173535991423801	0.857935610705429	0.390928019168667	0.601671956405786	Rhobtb1	heart
259.670987293385	-1.46733870580938	0.165515662598296	-8.86525590856371	7.63285560276974e-19	1.07363589530093e-16	Cabcoco1	heart
544.612204103963	-0.320848810489337	0.181562913107031	-1.76714949655053	0.0772031950404441	0.205293391762194	Arid5b	heart
287.076157648494	0.243464313642922	0.175525701628291	1.38705791450704	0.165424103721783	0.347665815030807	Actr6	heart
760.245964027562	1.25786374957173	0.132177069250248	9.51650506934935	1.79101237712753e-21	3.17358089266597e-19	Uhrf1bp1l	heart
144.676317594827	-0.282193469597422	0.225725799758422	-1.2501604597234	0.211240937568533	0.407546854098567	Poc1b	heart
405.596731158966	0.00773512246733603	0.167246642140197	0.0462497923327629	0.963111156364849	0.983066604375461	Dusp6	heart
858.629296247195	0.0991723691859642	0.16118088324396	0.615286175320549	0.538365745796698	0.727129502638106	Tmpo	heart
1754.20276943757	0.113733417293579	0.216944452738405	0.524251327277403	0.600103745402473	0.770038136205336	Kitl	heart
729.219711223178	0.258613727762931	0.121385229909069	2.1305205580338	0.0331286604040397	0.11209304857895	Psen1	heart
943.34026254337	-0.243238050540259	0.179601565388368	-1.35432032574039	0.175634204232087	0.361658565466739	Sgk1	heart
98.4860249692179	0.164930207714537	0.285201877463846	0.578292854104527	0.563066418082401	0.745025532626316	Cep290	heart
339.990704955014	-0.175352014131818	0.166022836375174	-1.05619213573464	0.290880442974433	0.500097374488807	Ikbip	heart
1126.83343479701	-0.173454029385475	0.120028574866617	-1.44510613058788	0.148428077251363	0.323042380924804	Hbs1l	heart
1345.46096268088	0.582553080988747	0.133213314969282	4.37308448575938	1.22503287978512e-05	0.000184078729204716	Epb41l2	heart
194.533435002628	0.466585200443438	0.209596158527896	2.2261152290219	0.0260064641218732	0.0939455113790941	Apaf1	heart
276.616155156002	-0.0262817695520624	0.176836315795715	-0.148622014849165	0.881851900601898	0.941838538693722	Med23	heart
59.4953017342669	0.331474124912908	0.28425607672228	1.16611095437288	0.243569588235915	0.447030946485017	Ahi1	heart
629.906649692936	-0.190050386241035	0.227384250698313	-0.835811564157927	0.40326091979525	0.612650963593935	Nedd1	heart
202.050256053971	-0.23706250462764	0.206737584743036	-1.14668314869933	0.251512597489278	0.456092222241322	Enpp3	heart
293.920558997383	0.0346285460612051	0.227705758062107	0.152075847163075	0.87912711378917	0.939958493890716	Pde7b	heart
244.423068902092	0.000694558294091201	0.214690623032252	0.0032351589663367	0.997418721111738	0.998871072903632	Map7	heart
793.716712200002	1.41127027381682	0.564317181506969	2.50084583646403	0.0123897098326647	0.053597083372504	Ccn2	heart
1049.98683449574	-0.309296348057263	0.124752732589659	-2.47927513599731	0.0131649710792374	0.0561496922179165	Stx7	heart
601.578716300904	-0.682914065434648	0.1227756338607	-5.56229313553757	2.66252557385244e-08	7.61582786784961e-07	Pex7	heart
1206.82283887436	0.224230939763614	0.126082194755638	1.77845047984928	0.0753298982084294	0.202044649332772	Ifngr1	heart
431.937718634193	-0.204800986933349	0.15558709277692	-1.31631090521751	0.188069712125745	0.377837062606861	Cdk17	heart
17.1475548748076	1.88994360835972	1.88435530029211	1.00296563395807	0.31587744279365	0.526938724718983	Hal	heart
434.488400632891	0.931362380714718	0.222820749948965	4.17987274940973	2.91672262663969e-05	0.000388630503104218	Ntn4	heart
217.150684486592	0.251483328032471	0.178494974318595	1.40890985302252	0.158861825701511	0.338673554667409	Fgd6	heart
3934.9586546687	-0.176584605842654	0.14581399057863	-1.21102649438451	0.2258852507281	0.425511302075686	Ndufa12	heart
893.722166301558	0.00251456802486886	0.125872548337695	0.0199770963413143	0.984061643391501	0.992279732646045	Tmcc3	heart
442.52728132517	-0.0681260821545608	0.186810350074125	-0.364680447991929	0.715349955186259	0.844950191856302	Cep83	heart
740.351802992947	-0.61014924313587	0.183432937653637	-3.32627962535262	0.000880135856562576	0.00673126324380033	Socs2	heart
4252.09344497779	0.287913993367888	0.13450971865798	2.14046982062294	0.0323168172221451	0.110299043656593	Nudt4	heart
492.607045410585	-0.214263763929925	0.131592902493105	-1.62823191730383	0.103475719455884	0.252025846690268	Nuak1	heart
2047.2167374188	-0.211136737720658	0.132275978010184	-1.59618353155856	0.110447823309799	0.263452814901906	Tcp11l2	heart
112.181697386598	-0.284827510682012	0.277577418189117	-1.02611917259046	0.304835414094501	0.514049485836779	Cry1	heart
29.0810501232637	0.188950195346998	0.436396501740014	0.432978253935606	0.665030568114594	0.814126230745596	Btbd11	heart
2789.92019174417	0.533067906362673	0.169906030753085	3.13742781230263	0.00170437237979963	0.0115178091877098	Timp3	heart
4843.11512718064	-0.106364498977728	0.150290137790125	-0.707727736109089	0.479114349793528	0.677563506504232	Hsp90b1	heart
485.745792229764	-0.190779254150945	0.195686571390228	-0.974922565179514	0.329598671981432	0.541812563917429	Igf1	heart
479.918122733937	-0.203326522638249	0.153496990672229	-1.3246287223469	0.185294324610249	0.374486115387682	Washc3	heart
132.663736035663	0.440037585739913	0.210410611456279	2.09132791684961	0.0364986789495295	0.11964230220119	Dram1	heart
342.507431323104	0.425492729160794	0.185513351441948	2.29359626061169	0.0218137003893389	0.0825592588383191	Sirt1	heart
670.707427657321	0.594205641217275	0.152172167464197	3.90482472004664	9.4293703430274e-05	0.00106413837022552	Herc4	heart
1593.1002202461	0.00487754118310219	0.198325409513249	0.0245936271861138	0.980379102532515	0.991136159315648	Mypn	heart
513.078867453809	0.130825654867208	0.137160969055165	0.953811100697251	0.340179269344578	0.553536786039048	Hnrnph3	heart
239.720424524545	0.559742802123771	0.202860934567917	2.75924392893089	0.00579352721472793	0.0302977712984852	Rufy2	heart
689.912337983367	0.0326866005080671	0.171053759592252	0.191089635129818	0.848455367979387	0.921411358656534	Ccar1	heart
722.44022307098	0.0349223497990843	0.130526839364301	0.267549187348479	0.789046347913648	0.887877577913844	Ddx21	heart
928.882505225489	0.0139884656884162	0.139327525266474	0.100399871896542	0.920026871465497	0.964861513505329	Ddx50	heart
1072.98075562792	0.3054209701661	0.189904675384117	1.60828568095193	0.107772625254833	0.25892757509719	Srgn	heart
1449.88457578044	-0.224822856226805	0.106871154184367	-2.10368137167262	0.0354062504885966	0.117224674027278	Vps26a	heart
556.792855869982	0.161473701481584	0.1320288111225	1.22301867379359	0.221322643289849	0.420132217686312	Supv3l1	heart
37.637145955211	-1.54062040120634	0.363159420678974	-4.24227023582632	2.21270028231645e-05	0.000308376738017626	Fam241b	heart
377.214541079996	-0.177759622265595	0.159437156508944	-1.11491967216327	0.264884845834703	0.470860840897804	Aifm2	heart
90.7116208849598	-0.0763183639964045	0.242146638626206	-0.315174162356285	0.752629422036668	0.865987167673158	H2afy2	heart
177.334261810724	-0.0616464436149345	0.225486409338444	-0.273393167223689	0.784551004564022	0.884881698460074	Tysnd1	heart
3433.52551157051	0.219669422308045	0.106813385435908	2.05657204302221	0.0397274097507036	0.12735920550719	Sar1a	heart
679.384781970862	-0.118554429738579	0.142333586639721	-0.832933621202616	0.404882166652408	0.613733172070375	Ppa1	heart
2198.19259299078	0.13076910991262	0.117963550264128	1.10855522421816	0.267622103217955	0.473904734108472	Eif4ebp2	heart
567.100435901666	0.287609742627214	0.12739791211735	2.25757029960026	0.0239724620645038	0.0886156251444297	Pald1	heart
498.032820007774	0.027578144778455	0.145123550236846	0.190032181086025	0.849283913124181	0.921729425375453	Sgpl1	heart
440.117116627676	-0.025835083109873	0.149423821647598	-0.172898021379767	0.862731586942444	0.929936266868308	Unc5b	heart
260.408403513996	0.726408094321526	0.198404963857653	3.66123951839578	0.000250997967958512	0.00242708453212327	Slc29a3	heart
758.380646933015	0.557157692678169	0.174386818916734	3.19495301387544	0.00139853607147243	0.00983588977276795	Vsir	heart
174.844806790722	-0.88930230006111	0.233006783553646	-3.81663695150043	0.000135282999865544	0.00144428892814201	Slc16a7	heart
34.5692319620732	0.120165675770868	0.358812803451439	0.334897959646334	0.737702061287066	0.858513043688224	Lrig3	heart
775.01636399943	-0.456285573786374	0.162800384372328	-2.80273032244715	0.0050672020433686	0.027305254612844	Anapc16	heart
625.227772947313	-0.426526976240929	0.273195995067321	-1.56124900782614	0.11846500985844	0.276533206930462	Ddit4	heart
550.604136265141	0.211242546846522	0.168383720169795	1.25453070304842	0.209649173210126	0.405342384253287	Dnajb12	heart
399.433870290213	0.105404718931517	0.138498019459261	0.761055785079445	0.446623748063589	0.65040105895044	Micu1	heart
773.54128860561	0.723333657643378	0.143446822552421	5.04252129655254	4.59437603528755e-07	1.02395424490171e-05	Cand1	heart
374.623346788559	0.127909472671064	0.148592468407154	0.860807240381678	0.389344216616752	0.600154158891535	Tbk1	heart
513.77082822409	-0.700988789377545	0.144102263980932	-4.86452308251244	1.14733117860537e-06	2.29415376499911e-05	Pno1	heart
222.084404569094	0.151298013755697	0.283443884995703	0.533784716357493	0.593490489113545	0.765225094540823	Plek	heart
67.7871764848721	0.256247131626419	0.278911456210308	0.918740072954194	0.358231544145654	0.570461156433625	Srgap1	heart
195.269650362823	-0.114191995474038	0.232443371844379	-0.491268021832384	0.623236894151611	0.786336617699702	Egfr	heart
24.3611175425857	-1.24970848074023	0.445509921604588	-2.80511930293083	0.00502979589523207	0.0271358383529246	Avpr1a	heart
1464.31085755304	0.0550105740687223	0.167584174511706	0.328256377602526	0.742717824003252	0.861411253884764	Usp15	heart
743.914301058046	0.472923703741069	0.13397848916811	3.52984801274826	0.000415798455608395	0.00370310321691967	Vps54	heart
718.082638648527	0.361556108329486	0.150350346690527	2.4047573968931	0.0161832051354843	0.0658133087536656	Tbc1d15	heart
1893.87049365291	0.0992002175900155	0.108895749351319	0.910965011774483	0.362313809124864	0.574681424285009	Rab21	heart
340.103403449974	-0.0382993276397499	0.17946642708273	-0.213406642469652	0.83100979989759	0.910987564495907	2310011J03Rik	heart
263.200715871884	0.158594852624029	0.196395231684381	0.807529038581246	0.419361751364303	0.626879832568484	Peli1	heart
79.9279626931129	-0.0260738012354482	0.24362797012032	-0.107023020479016	0.914770716938867	0.962708096113956	Apc2	heart
286.575273547493	0.112474431399343	0.167547590070836	0.671298413494289	0.502030445140912	0.698308022581569	Thap2	heart
58.4458361230509	0.956252675080937	0.296497615125481	3.22516143907681	0.0012590165076462	0.00903630785393201	Slc1a4	heart
127.323138995428	0.233841820145006	0.235852545936156	0.991474648776128	0.321453865297029	0.532728996666546	Dock2	heart
3528.56876855187	0.0428942103423029	0.108931398752814	0.39377269394693	0.693748866082607	0.830380693817974	Rab1a	heart
77.4027698907688	0.0257996085968184	0.259855022591849	0.0992846254788058	0.92091228518963	0.965344746398841	Gamt	heart
61.4321013852419	0.0428885492932616	0.283647336972792	0.151203779139924	0.879814969249407	0.940399172772339	Ptprr	heart
1716.85825027286	0.224867095219473	0.172178803754818	1.30600916207829	0.191549441859715	0.382258385949093	Actr2	heart
4320.62705945119	-0.248585242331991	0.234974407250025	-1.05792475547127	0.290089748038866	0.499367211991205	Ndufs7	heart
3902.40300572825	0.36103822309511	0.137019869015219	2.63493335448312	0.00841538045591817	0.0402949374172583	Ptprb	heart
42.9073854377048	0.570135907163975	0.37241071794992	1.53093313291978	0.125785919496924	0.287812021736716	Kcnmb1	heart
394.118496353856	-0.0892161472770593	0.158712819427489	-0.562123132831242	0.574032128327025	0.752673120318095	Pwwp3a	heart
380.666750247181	-0.624965765454824	0.166599958438182	-3.75129604661169	0.000175922827188713	0.00180744808295391	Meis1	heart
9236.8606719446	-0.656270760437997	0.252619103423377	-2.59786671532169	0.00938048969959327	0.0436987029319061	Uqcr11	heart
739.285066524236	-0.0608579142442155	0.155153998494171	-0.392241997208353	0.694879416031091	0.831150587562742	Cnot2	heart
356.2767623008	-0.261369810320999	0.225648713995365	-1.15830401021638	0.246739995443154	0.450319242148893	Tcf3	heart
59.7909036476228	-0.475081702931221	0.349156843153712	-1.36065413651959	0.173623014731054	0.358833896261058	Best3	heart
565.890139111002	-0.139011878027185	0.137198320607986	-1.01321851033717	0.31095580089474	0.521598346128329	Frs2	heart
487.46364549135	0.261935636131791	0.146006632860024	1.79399819721141	0.072813456579598	0.198002792982963	Yeats4	heart
178.679311295753	-0.186749725756596	0.201864993487424	-0.925121897216075	0.354902504016118	0.566681072533167	Cobl	heart
30.4028845661299	0.00374047201559391	0.411002012164562	0.0091008605916417	0.992738664081542	0.996976765253096	Rab36	heart
1897.70096025561	0.713266573756517	0.10420949611229	6.84454488665738	7.67193798285327e-12	4.20385228265261e-10	Grb10	heart
177.324188022026	0.135067081092095	0.258070311700228	0.523373185401456	0.600714580574112	0.770532434571512	Adora2a	heart
1018.98353820812	-0.164856222884978	0.141873337160684	-1.16199580685314	0.245237168186695	0.448527603584352	Snrpd3	heart
149.129937438732	-0.389031088703721	0.217466109898016	-1.78892742821474	0.0736265038659432	0.199376780058284	Nav3	heart
118.977020999499	-0.190782774817428	0.340204519744806	-0.560788477944203	0.574941742306981	0.753519874633519	Ddc	heart
174.984208538164	0.167826177447193	0.227290222410588	0.738378341431794	0.460284572203214	0.661135140871739	Cpm	heart
794.668829842752	-0.256319601008304	0.123965627971171	-2.06766670086899	0.038671375210662	0.124853820012842	Mdm2	heart
25.1499605043646	0.368961485296104	0.41137769542695	0.896892294836686	0.369776392019461	0.581602832712182	E2f7	heart
842.898989293803	1.90746916728939	0.161714273977352	11.7953048940907	4.12703206432464e-32	1.60883501387558e-29	Csrp2	heart
1585.16467033888	0.274335145026037	0.15298651665262	1.79319819176587	0.0729412391306544	0.198091215505304	Osbpl8	heart
3289.43558223386	0.673150534042295	0.197943075333271	3.40072787547092	0.000672066945099254	0.0054581436898418	Mknk2	heart
26.0475392523111	-0.595237870421735	0.417417075059689	-1.42600268648957	0.153867566594316	0.331026344782851	Zpbp	heart
498.864164504409	0.168186278262139	0.157880949359806	1.06527278271457	0.286752505647283	0.495749010016666	Cabin1	heart
1206.30222523617	0.505671460790542	0.127597218158302	3.96302888173619	7.40048247585149e-05	0.000865970693829483	Ap3d1	heart
113.627479149341	-1.04063957659704	0.304713760021627	-3.4151381169107	0.000637496771666132	0.0052555927206119	Phlda1	heart
314.566702125118	-0.252032058168212	0.233499358129486	-1.07936938322738	0.280423093870054	0.489119997724093	Sf3a2	heart
67.4117779153084	-0.41232359153625	0.306600016519855	-1.34482573163707	0.178681518538501	0.366055651492389	Mdm1	heart
78.3821910796999	0.88453473664114	0.858225557279873	1.03065532031539	0.302702484000257	0.51178100268891	Wif1	heart
606.707382393691	-0.627804960944967	0.290313007461394	-2.16251061719462	0.0305788396130228	0.105919697303905	Timm13	heart
1858.65501569223	0.0424825847011233	0.131726383490142	0.322506270767713	0.747069187950725	0.863961010374613	Vps13d	heart
154.502028283001	0.22975659023323	0.195896917876645	1.17284433427332	0.240858235721316	0.443670820599654	Llph	heart
944.052468912781	0.181263274429675	0.132951095306682	1.36338308467148	0.172761809287409	0.357579205994753	Tmbim4	heart
140.364761063529	0.48292837190654	0.211137044317746	2.28727447363413	0.0221798074584825	0.0835739555270741	Irak3	heart
192.223958696389	0.214447451008654	0.220327088089459	0.973314052612461	0.330397240331071	0.542863673780964	Helb	heart
288.877378645138	0.363030358154132	0.172285091018245	2.10714900522464	0.0351046656164598	0.116593977037726	Prmt2	heart
286.231969068494	0.0642686849473009	0.148963567916967	0.431438947428573	0.666149235815775	0.814421162497351	Dip2a	heart
490.621400071253	0.189254083516524	0.212904555257331	0.888915144571609	0.374048685600947	0.585340718741744	Hmg20b	heart
417.991756189586	-0.155261105300294	0.207596613460345	-0.747898064001667	0.454521645412552	0.656381597164358	Fzr1	heart
652.261458180501	0.076305112031762	0.236149168565498	0.32312250979024	0.746602463529171	0.863787332518614	Ncln	heart
1959.99568205117	0.0292725109403957	0.149785287735992	0.195429814121602	0.8450564782748	0.919307175058314	Col6a2	heart
393.523306158752	0.0418297319074505	0.160042918587782	0.261365715375325	0.793810493522879	0.890050656185916	Hcfc2	heart
277.226756980295	-0.0465081257633738	0.16672599259421	-0.278949460967186	0.780283610058903	0.881745036909365	Nfyb	heart
714.572291424599	-0.0786904209507543	0.13372114375108	-0.588466556173312	0.556219175526659	0.740756899061565	Txnrd1	heart
53.001145562551	0.269485579041171	0.327336869164006	0.823266806850742	0.410356285165263	0.618560887706585	Glt8d2	heart
188.557718820082	0.194433105447038	0.178390885744138	1.08992735046962	0.275745147560701	0.483355937960096	Ppm1m	heart
263.495893087553	0.0362840867459462	0.16892452676752	0.214794662683185	0.829927414344058	0.910590694394856	D10Wsu102e	heart
126.88867059483	-0.837450607063911	0.252882166801166	-3.31162381933549	0.000927561821553165	0.00703482684450883	Aldh1l2	heart
1229.31712647856	0.462941380311517	0.132904286017791	3.48326900646038	0.000495330371457408	0.00427469170661915	Wdr82	heart
756.280368771978	-0.0877301171858896	0.162646691773551	-0.539390726176184	0.589617278698286	0.762976357960518	Pofut2	heart
316.91272693075	0.925505569342596	0.166144377381149	5.57048985906641	2.54024102656681e-08	7.312035562548e-07	Slc36a1	heart
450.462122830109	0.102393397629559	0.136523169518606	0.750007474852862	0.453250202850363	0.655725349134805	Adarb1	heart
1246.58028048822	0.0360334803518057	0.117470437993996	0.306745092358023	0.759037404504269	0.869491792494917	Appl2	heart
361.86381042778	-0.790410628586289	0.190506251174548	-4.14900101027179	3.33929337568751e-05	0.000437248741054514	Slc36a2	heart
993.607722725004	-0.260228721763476	0.147271635194449	-1.76699825068069	0.0772285212649754	0.205320721773056	Sumo3	heart
3588.00521352635	0.0244772665339171	0.141885931864946	0.172513696123275	0.863033694831087	0.93018656546926	Hint1	heart
222.0606553344	-0.54514006366697	0.219019518773883	-2.48900219815466	0.0128102173717032	0.0549458050360006	Lyrm7	heart
974.346695291568	0.110833879172732	0.114028735905454	0.97198200341911	0.331059501724766	0.543624484478603	Fbxw11	heart
339.689741024466	0.068631887515692	0.178172129639048	0.385199905589783	0.700089313288025	0.834408951783912	Stk10	heart
243.650225953542	-0.106913320716415	0.175569776202486	-0.608950600888794	0.542557182763144	0.72982847299816	Papolg	heart
194.438249880597	-0.589548657585532	0.199243675346194	-2.95893285727222	0.00308706354156604	0.0184493626636562	Rel	heart
1661.76647817368	0.464451061354427	0.18889307510346	2.45880406732772	0.0139400673441889	0.0587757351187	Pfkl	heart
247.128937225714	0.26783761358449	0.216669819581242	1.23615561272973	0.216400726308602	0.414221592277577	Pus10	heart
426.067293265524	0.0626307653947751	0.184665489883346	0.339157930560491	0.734490759513698	0.855649686726367	Rhbdf1	heart
651.897936411212	-0.0608513925645179	0.149079726030483	-0.408180201190303	0.683141382606932	0.823908999604367	Pex13	heart
203.592063926137	-0.153748683610779	0.209029046214876	-0.735537411641488	0.462012264226717	0.662431203563402	1810043G02Rik	heart
47.5994060190851	0.555356759880825	0.310265153427056	1.78994242101181	0.0734631682851768	0.199151891135099	Mpg	heart
307.468080189336	-0.00172820362129055	0.160095706292765	-0.0107948155594517	0.991387150601805	0.996352849352609	Ahsa2	heart
310.563488455031	-0.215004753970897	0.151772996482412	-1.41662060415215	0.156593881179036	0.33530554218562	Nprl3	heart
1060.89842214882	0.280606027044304	0.189735805351894	1.47893027635916	0.139158950512716	0.30895649609268	Xpo1	heart
1010.69249601977	0.408316511553965	0.129275156163925	3.15850720022497	0.00158579391994335	0.010872649368697	Cpeb4	heart
320.976791010823	-0.45995749391161	0.225656415625793	-2.03830896026621	0.041519044354782	0.131587884129302	Stc2	heart
214.804852660912	0.170683354691925	0.182111123639718	0.937248374951541	0.348630811489091	0.561463502355661	Asb3	heart
2223.97892896989	0.108653879017535	0.198235201624972	0.548105876892088	0.583619205504586	0.758782216294759	Cdc34	heart
82.4950489335329	-0.232373635996188	0.376811146059005	-0.616684613569792	0.537442771902575	0.726386248621965	Tpgs1	heart
277.916918654457	-0.235657392139383	0.200642843094657	-1.17451182661027	0.240190077666147	0.442765408771822	Chac2	heart
913.380174814533	0.375449927251114	0.118863678619546	3.15865983294054	0.00158496371424197	0.0108724207728092	Erlec1	heart
84.0910725997038	0.422385246705403	0.275174641425608	1.53497155303677	0.124790815793686	0.286160191733422	Shc2	heart
17617.663470039	0.305123990444028	0.117371185407416	2.59964990031316	0.00933189116374729	0.0435743747563888	Sptbn1	heart
82.6129014344155	0.277676604487458	0.234665486061384	1.18328693813467	0.236695447683019	0.438036218854096	Wdpcp	heart
45092.1526143649	-0.441651988213042	0.0934345275683196	-4.72686061253003	2.2801767140335e-06	4.20984182493546e-05	Mdh1	heart
28344.2268371561	0.934287015846082	0.16532684653808	5.65115125226129	1.59376771643482e-08	4.82158907384406e-07	Ccng1	heart
291.495370118519	-0.157377597433759	0.169583390132671	-0.928024833744844	0.353394687908401	0.565530978398102	Nudcd2	heart
273.999408018039	-0.30080415336165	0.28013887731681	-1.07376796909723	0.282926689341061	0.491438796864346	Polrmt	heart
732.283690308989	2.71817066726792	0.156543369604239	17.3636908042787	1.55404265901544e-67	2.12033580396067e-64	Hcn2	heart
96.8043333703344	-0.237707364186939	0.297143471838678	-0.799975051499676	0.423725252050638	0.630913526508714	Acsl6	heart
47.5091211838064	-0.90283322994252	0.323500027027287	-2.7908289165811	0.00525732530377475	0.0281077376350716	Slc22a4	heart
35.1935656653279	-0.687482995061602	0.398254541755958	-1.72624018807267	0.0843042107908455	0.218387441053787	Zfp354b	heart
461.097291854284	-2.12380173810966	0.813893255835182	-2.60943523353109	0.0090691811895825	0.0426101612089062	Cyfip2	heart
848.238541754312	-0.310440409623969	0.159498599871605	-1.94635194211029	0.0516124781790962	0.1540920464498	Mgat1	heart
3679.46366186234	0.141855011115311	0.0992213106806496	1.42968289918968	0.152808050528211	0.329578413121548	Ppp2ca	heart
395.71737624086	-0.208411616107179	0.187557913726753	-1.11118540383642	0.266488552655921	0.472539402215815	Sgcd	heart
491.320646941547	0.385540533782103	0.147357553700654	2.61636084543925	0.00888725812056265	0.0420060170377142	Flt4	heart
918.755171537863	-0.0485116162537208	0.150845733016403	-0.321597537322754	0.747757609738264	0.864402565053822	Hnrnpab	heart
180.890377330731	-0.629405893028149	0.189696196452154	-3.31796791290384	0.000906749002614172	0.0068923027251631	Phykpl	heart
2512.64566087015	0.263471258853908	0.115778508956853	2.27564909263164	0.0228670205335973	0.0855960571084778	Hspa4	heart
1104.58156619429	1.06651644887271	0.143399907009358	7.437358022855	1.02718885541562e-13	7.4547684804738e-12	Cnot6	heart
446.789832541587	1.23506324988515	0.233930851528082	5.2796082338754	1.2946038868754e-07	3.21155916955053e-06	Gfpt2	heart
58.6444672388542	-0.102467688321317	0.298736226760294	-0.34300389153518	0.731595532542857	0.854467509503059	Zfp354a	heart
910.348806780455	-0.222455498876627	0.116712847760907	-1.9060069490579	0.0566493040772214	0.165401905591613	Mapk9	heart
5193.22194634556	-0.396616559488267	0.142642808643517	-2.78048759176821	0.00542773339196324	0.0288492381768393	Canx	heart
8493.27506522463	-0.511429483493089	0.143920192899295	-3.55356307680153	0.000380050045701607	0.003450035145411	Rack1	heart
585.238026545259	-0.0608546000049846	0.135479687174997	-0.44917877560774	0.653302697008289	0.8062284730446	Rufy1	heart
1157.44931162946	0.153565732671833	0.129296514616351	1.18770202837635	0.234950824370944	0.436264160005057	Rnf130	heart
18.0433983579111	0.426849054369697	0.540831840497931	0.789245422341826	0.429968578715805	0.636555044270664	Ltc4s	heart
198.570320918452	-0.0135576144527016	0.195860106400299	-0.0692209082384163	0.944813780655853	0.975263975130009	Rad50	heart
17.5845172057778	-0.11083118138999	0.47296783056606	-0.234331331281758	0.81472776410593	0.902577591219658	Mrnip	heart
818.409254050413	-0.169951286279665	0.151839488372042	-1.11928252723853	0.263019627553086	0.468796838449943	Clk4	heart
2026.43032421669	-0.204722853823181	0.120966205566693	-1.69239708614576	0.0905702875680386	0.229606280858105	Sar1b	heart
415.656019671918	0.219855547931307	0.160835250368952	1.36696120674394	0.171637465330203	0.356333167523629	Jade2	heart
225.22859142894	0.569334886292999	0.229836408364705	2.47713097478262	0.0132443289913182	0.05636482369231	Pdlim4	heart
166.355385191242	0.707106760327289	0.192170666915298	3.67957697018846	0.000233621170540112	0.00228006241119406	Cdkl3	heart
6071.964286737	-0.319691030782047	0.097935413613623	-3.26430469822999	0.00109733086258219	0.00805378283435796	Ube2b	heart
388.722646131424	0.328261775129526	0.153490682573241	2.13864300833302	0.0324645915248879	0.110626095595797	Cdkn2aipnl	heart
1725.23262044918	-0.208846327505255	0.151275741877618	-1.38056720074929	0.167412074002621	0.349847469224723	Kremen1	heart
70.4205207203384	0.0514341597613992	0.250728131674568	0.205139165748493	0.837463397222231	0.914913170926425	Med7	heart
22.3351647822502	0.337045891449022	0.438849405672498	0.768021756649137	0.442474259321935	0.646749093252562	Havcr2	heart
740.993115532174	0.228310603476698	0.188073548526299	1.21394319012794	0.224769418579159	0.424346747902871	Tnip1	heart
15892.8753791761	-0.201280614977812	0.110979710544215	-1.81367039065777	0.0697284862272061	0.192547149581866	Vdac1	heart
103.559446476552	0.454205120856953	0.29117784484804	1.55988901248306	0.118786111429801	0.277007416611584	Upp1	heart
619.216763203056	-0.159127782378352	0.154506569374015	-1.02990949202393	0.303052494492525	0.512150341739896	Slu7	heart
366.268443642112	-0.119090302364952	0.147866185348997	-0.805392403164199	0.42059327421114	0.6278589223212	Ascc2	heart
331.912745906571	0.139797948644723	0.168036289081728	0.831950939934941	0.405436637029624	0.61423245343462	Hus1	heart
188.180920058837	-2.49948541631	1.18693987554088	-2.10582310681155	NA	NA	Pttg1	heart
49.0459731900507	-0.25266573603211	0.292880032263903	-0.862693622638099	0.388305939676655	0.599190934285036	Zfp607a	heart
681.633359801479	0.364244341837193	0.134754637353529	2.70301897575219	0.00687128234899981	0.0346755152616296	Tns3	heart
1546.47821322809	1.56936659259486	0.582009162093568	2.69646372395519	0.0070080030323878	0.0351792470102646	Btg2	heart
95.9564519628131	-0.0559267829384161	0.251504061672851	-0.222369303169203	0.82402640613625	0.908128210888072	Castor1	heart
639.787990933557	-0.0864801067814152	0.170968417976668	-0.505825039529915	0.612979478890215	0.778349459199824	Igfbp3	heart
528.241161994885	-0.230125689042247	0.132485507491285	-1.73698764038312	0.0823893524934365	0.214936964707543	Pes1	heart
26.2359287611761	-1.24098044931484	0.535336500441143	-2.3181315832046	0.0204421709068976	0.0789004186290553	Adcy1	heart
1116.88962292508	0.337442043893811	0.115116110310192	2.93131902202513	0.00337525966662491	0.019807330275884	Tcn2	heart
317.135977213681	-0.354633972758811	0.210387268775761	-1.68562468072531	0.0918681123722632	0.232034158683295	Osbp2	heart
71.0202689026067	0.273571340799853	0.285538142553793	0.958090356521507	0.338017197810871	0.551201941786964	Myo1g	heart
1450.51456133773	-0.193652322591651	0.180062831216168	-1.07547083028573	0.282163985041596	0.490662088256206	Smtn	heart
858.810714731073	-0.13242097568626	0.191809444325861	-0.690377766077528	0.489956655085575	0.687117751257845	Arf5	heart
116.357572333692	-0.144585950045846	0.239466141217894	-0.603784523818273	0.545986910041157	0.732348151848362	2310033P09Rik	heart
1147.60421413177	-0.870808144245891	0.181420558266078	-4.79994192812884	1.58711644818027e-06	3.01176868135906e-05	Guk1	heart
570.655251451758	0.416471068148995	0.132204166045159	3.15021137841249	0.00163152372703982	0.0111080387882891	Rnf185	heart
541.849825853937	0.0537421504130332	0.12936673042154	0.41542481778673	0.677830941872909	0.820601201374547	Limk2	heart
218.144894192448	-0.632935863544262	0.240879528585439	-2.62760338025056	0.00859887089761608	0.0409933593735408	Patz1	heart
740.985482465129	0.031517023542798	0.136580794880893	0.230757359190089	0.817503309637032	0.904477388638312	Eif4enif1	heart
317.572006196301	-0.221954116113786	0.17898581816207	-1.24006537720664	0.214951213763665	0.412546681754317	Trim11	heart
27268.86170486	-0.206250877449289	0.16025999577617	-1.28697668092637	0.198102416105919	0.391045915125747	Ogdh	heart
867.645210268822	-0.101575517614723	0.116521735350751	-0.871730216761384	0.383355571791617	0.594645682301595	Drg1	heart
1328.85117281248	0.210484183656994	0.128807421123704	1.63409981987644	0.102237892680562	0.249988137586663	Rtn4	heart
590.748637314548	-0.43046803502928	0.153310384737692	-2.80782046021079	0.00498780261033493	0.0270161090970265	Mtif2	heart
5269.24858769899	-0.323519227388862	0.15520999484935	-2.08439686956292	0.0371240823542561	0.121206264570823	Rps27a	heart
374.684802523794	0.479882445920848	0.167851466863803	2.85897082037555	0.00425017877999888	0.0238051885362499	Cfap36	heart
767.570585485201	0.705778266864389	0.134077007930961	5.26397685744754	1.40972202905071e-07	3.45939700797984e-06	Ppp4r3b	heart
477.782102765826	-0.228379043416166	0.165108669400086	-1.38320443285001	0.1666021909117	0.348745058729555	Pnpt1	heart
257.370594741592	0.579505942274651	0.325424185969833	1.78077096681552	0.0749498742451003	0.201461009495695	Efemp1	heart
513.096990790679	2.84754177886905	1.57862547054888	1.80381086710768	0.0712609616673106	0.195434082610811	Myl7	heart
327.732351643444	-0.461780940279288	0.178831067047597	-2.58221878280457	0.00981673305543888	0.0452651253154471	Pold2	heart
333.200753611256	-0.107658102010106	0.165702976858663	-0.649705298305738	0.515882600845732	0.708998225323547	Zkscan17	heart
393.646709101898	0.796490431295181	0.162098726320902	4.91361313794897	8.94130965310171e-07	1.8797415856228e-05	Aebp1	heart
71.9133914826931	0.0655691928063945	0.273376294959366	0.239849591992388	0.810446859994123	0.899959965559976	Polm	heart
6846.26931101768	-0.319490441073175	0.194548684543497	-1.64221331962666	0.10054580327186	0.247118374993677	Pgam2	heart
624.920196595552	0.0672428711347348	0.187357787075927	0.358900861203514	0.719669255346009	0.847356517081545	Dbnl	heart
882.58666160632	-0.492743694048481	0.145292157399416	-3.39139911519037	0.000695367580241748	0.00561367632354697	Mrps24	heart
620.207739977294	-0.193611569155508	0.14628402018425	-1.32353191354495	0.185658550588458	0.374944532893564	Ccdc117	heart
7418.1196561869	-0.0556725712383454	0.106577309050611	-0.522367957441186	0.601414161459413	0.770788228825954	Dynll2	heart
1449.98620450631	-0.404051582838717	0.152537197985645	-2.64887245979661	0.00807608032014885	0.0391438862835208	Xbp1	heart
479.366625401176	-0.278547093345271	0.14931348401083	-1.86551867830683	0.0621087365567912	0.177171566293301	Supt4a	heart
815.12714545982	0.0473892427049782	0.168607811051982	0.281061965097026	0.778662873176468	0.881227292768723	Sept4	heart
87.858439072076	0.248324522102388	0.356392895362231	0.696771808119228	0.485945611727712	0.683741561968949	2810021J22Rik	heart
234.499062421071	-0.546705532799083	0.211175844559473	-2.58886395808927	0.00962931281558687	0.0445666024612847	Ska2	heart
25.8766549605948	1.39697601416697	0.433399327701227	3.22329991044657	0.00126722797434474	0.00908091306825609	Prr11	heart
187.038345956045	-0.0819911779916485	0.178090028037484	-0.460391740599823	0.64523506204536	0.801864968282962	Smg8	heart
1893.38484982926	-0.586355479522602	0.178475783734755	-3.28535035539625	0.0010185563150035	0.0075816597719082	Rnf187	heart
131.120931884735	-0.34603105843571	0.194284381608277	-1.78105442944657	0.0749035593352129	0.201415877723619	Tubd1	heart
508.378691966104	-0.152904620462015	0.151877589228951	-1.00676223028215	0.314049049036055	0.524851203460061	Mrpl22	heart
754.212026623014	-0.0870616503301021	0.119041963668947	-0.731352605810658	0.464563806083575	0.66417227769196	Cnot8	heart
870.33485806417	0.486182702499088	0.147951687220355	3.28609096410629	0.00101588197887452	0.00756588085139952	Rps6kb1	heart
340.493397259934	-0.293438647868868	0.14765111123158	-1.98737852645505	0.0468804654837524	0.143641830464927	Sap30l	heart
338.847480056005	0.126631060928937	0.15273483239822	0.829090908344836	0.407052967937989	0.615644443938596	Galnt10	heart
805.771935823721	0.673928516631568	0.132248878134826	5.09591102878399	3.47068109406503e-07	7.98549289163968e-06	Rnft1	heart
414.024892348455	0.00978128777021679	0.168612411304014	0.0580104850797772	0.953740276707178	0.979041413874491	Mfap3	heart
911.81054248562	-0.281453617398222	0.112923356028976	-2.49243050592653	0.0126872155359628	0.0545382384286946	Fam114a2	heart
197.742335697135	-0.00111120503015837	0.219683850929888	-0.00505820079835093	0.995964156887336	0.998333537667211	Ppm1d	heart
159.968589941706	-0.380646010956071	0.185918879260736	-2.04737685849669	0.0406210967397159	0.129524244897566	Znhit3	heart
94.5079971553264	0.0805634533130916	0.23296488450315	0.345818012379467	0.729479487487785	0.853310881968736	Myo19	heart
192.555766819943	0.269583281952079	0.182704881074323	1.47551220507576	0.14007488939915	0.310005156684834	Prpsap2	heart
1055.84974784902	0.108269355384173	0.119471121335666	0.906238714207591	0.364809515867952	0.57662894282928	Ggnbp2	heart
161.130512855173	-0.216912959745434	0.20218130323431	-1.07286359458298	0.283332322348818	0.491955485635947	Acaca	heart
124.620648056836	-0.733000123968296	0.267561542926429	-2.73955709759772	0.00615220275991651	0.0318077508360367	Shmt1	heart
326.413741127068	-0.0715033171658787	0.16688274151659	-0.428464420682892	0.668313031781429	0.815896833001594	Llgl1	heart
459.532933514699	-0.077968588681251	0.149775407480779	-0.520570032107954	0.602666330150064	0.771610043517574	Drg2	heart
290.287762674032	-0.291885985175679	0.173438534328277	-1.68293618431536	0.092387445880094	0.233043873467924	Srebf1	heart
414.041464120135	0.529796456556672	0.156586517795332	3.38341042393668	0.000715915571580675	0.00574585415214513	Tom1l1	heart
876.987116767984	0.233622917784015	0.191339677181834	1.22098521971477	0.222091616011333	0.420922073740606	Myocd	heart
39.1260624680434	0.0756226666730387	0.425416225385638	0.177761594787522	0.858910209830838	0.927500665051995	Cox11	heart
141.958085590104	0.430682137479153	0.22053962824893	1.95285600551131	0.0508366600242459	0.152677831690691	Stxbp4	heart
2737.94202682884	-0.193441480353425	0.111200452943313	-1.73957457216507	0.0819337473954449	0.213941148232221	Bzw2	heart
342.750096396581	-0.446673775484538	0.162878434946598	-2.74237516851747	0.00609966295926638	0.0316440309567416	Elac2	heart
184.926223678496	0.859731271327857	0.203573377599361	4.22320089918554	2.4085694337909e-05	0.000330682019405401	Pctp	heart
188.076090451068	-0.419130885446029	0.232319216984129	-1.80411629690824	0.0712130774326337	0.195381304743787	Twistnb	heart
279.646941118122	-0.114671509256738	0.16857499137974	-0.680240338843757	0.496352294196517	0.69352080921836	Atxn7l1	heart
1653.85087273389	-0.0455201935756727	0.12351857233832	-0.368529142734842	0.712478719074151	0.84339567335974	Sypl	heart
1848.64220445202	-0.664225073429308	0.112740473441555	-5.89162927166209	3.82406332635969e-09	1.31424483689802e-07	Pdia6	heart
3778.12640990894	-0.260729144633689	0.165513939937485	-1.57527000282978	0.115194134924386	0.271333539091728	Nampt	heart
100.250885959986	0.020224433076533	0.258407681506218	0.0782656032461883	0.937616778138826	0.972595533448219	Pik3cg	heart
375.672020111391	-0.147605858543278	0.141954711555891	-1.03980950632387	0.29842841164952	0.507257661460826	Nbas	heart
1296.81023143506	-0.0368729616947971	0.169229325515079	-0.217887541550898	0.827516734355172	0.909508484255032	Tspan13	heart
2230.72457820718	0.381114733322262	0.127636190916079	2.98594568348444	0.00282702851952345	0.0172480550796844	Rock2	heart
8106.03782019375	-0.12545564692992	0.0993839257774209	-1.2623333798555	0.206828850310923	0.401704317956189	Laptm4a	heart
324.953136614621	0.154990678348653	0.184333651652602	0.840815971251687	0.400451038345941	0.610404826964371	Fam49a	heart
[truncated: 26,031 more rows]
