# Supplementary material for: Inducible and reversible inhibition of miRNA-mediated gene repression in vivo
Source: eLife. 2021 Aug 31;10:e70948. doi: 10.7554/eLife.70948 (PMC8476124; doi:10.7554/eLife.70948)
Supplement: Figure 6—source data 2. [file elife-70948-fig6-data2.csv]

seed	miRNA	z_score	pvalue	fdr	gene_set_size	tissue	counts	conservation	miRNA_family
AAAGUGC	mmu-miR-106a/mmu-miR-17/mmu-miR-106b/mmu-miR-20a/mmu-miR-93/mmu-miR-20b	11.7188024811767	5.10525479462003e-32	3.18057373704828e-29	766	Muscle	34067	2	mmu-miR-106a/mmu-miR-17/mmu-miR-106b/mmu-miR-20a/mmu-miR-93/mmu-miR-20b
AAGUGCU	mmu-miR-302a/mmu-miR-291a-3p/mmu-miR-294/mmu-miR-295/mmu-miR-302d/mmu-miR-302b	8.42607441409478	1.78727452753345e-17	1.03840650049693e-14	470	Muscle	10	2	mmu-miR-302a/mmu-miR-291a-3p/mmu-miR-294/mmu-miR-295/mmu-miR-302d/mmu-miR-302b
AAGUUGU	mmu-miR-382	2.52286803178092	0.00582010375936987	0.686772243605645	92	Muscle	427	1	mmu-miR-382
ACACACC	mmu-miR-329/mmu-miR-362-3p	5.684413075649	6.56313318757065e-09	3.18311959597177e-06	159	Muscle	1352	1	mmu-miR-329/mmu-miR-362-3p
ACAUACA	mmu-miR-466m-3p/mmu-miR-466o-3p	7.64110987347051	1.07678591347131e-14	6.10537612938235e-12	393	Muscle	1	0	mmu-miR-466m-3p/mmu-miR-466o-3p
ACAUUCA	mmu-miR-181a/mmu-miR-181c/mmu-miR-181d/mmu-miR-181b	9.80104028308793	5.57160186422519e-23	3.38196233158469e-20	655	Muscle	1214572	2	mmu-miR-181a/mmu-miR-181c/mmu-miR-181d/mmu-miR-181b
AGUUGUG	mmu-miR-669o-5p	2.19733587181384	0.0139982337678934	1	76	Muscle	30	0	mmu-miR-669o-5p
AUACAUA	mmu-miR-297b-3p/mmu-miR-467g/mmu-miR-466a-3p/mmu-miR-466d-3p	8.98446275407761	1.30000707321552e-19	7.72204201490016e-17	552	Muscle	23	0	mmu-miR-297b-3p/mmu-miR-467g/mmu-miR-466a-3p/mmu-miR-466d-3p
AUAUACA	mmu-miR-669f-3p	13.213925156035	3.64602529900574e-40	2.28241183717759e-37	934	Muscle	26	0	mmu-miR-669f-3p
CCCCUGG	mmu-miR-331-3p	5.62851216210492	9.08853439503206e-09	4.36249650961539e-06	92	Muscle	633	1	mmu-miR-331-3p
CUGGCUG	mmu-miR-3085-3p/mmu-miR-3064-5p	6.64101471990627	1.55765460690867e-11	8.34902869303045e-09	209	Muscle	7	1	mmu-miR-3085-3p/mmu-miR-3064-5p
CUGGUCC	mmu-miR-1934	5.31840290665828	5.23410283914541e-08	2.39530801124463e-05	142	Muscle	44	0	mmu-miR-1934
CUUUGGU	mmu-miR-9	11.3581682835585	3.377301534959e-30	2.09392695167458e-27	781	Muscle	795	2	mmu-miR-9
GAUUGUC	mmu-miR-219-5p	6.34852183250703	1.08696794533947e-10	5.65223331576526e-08	247	Muscle	165	2	mmu-miR-219-5p
GCACCAC	mmu-miR-770-5p	3.92016948057152	4.4243358953489e-05	0.0129190608144188	154	Muscle	11	0	mmu-miR-770-5p
GCAGCUG	mmu-miR-1968	5.50442866959382	1.85183688161287e-08	8.7591884500289e-06	257	Muscle	141	0	mmu-miR-1968
GCCCCCU	mmu-miR-3072	2.80694657470666	0.00250067678334268	0.3926062549848	54	Muscle	27	0	mmu-miR-3072
GCUGGAG	mmu-miR-1964-5p	3.64757513163996	0.000132363457548374	0.0344144989625771	129	Muscle	10	0	mmu-miR-1964-5p
GGCAGUG	mmu-miR-34a/mmu-miR-449a/mmu-miR-449c/mmu-miR-34b-5p/mmu-miR-34c/mmu-miR-449b	6.04994053877167	7.24496526660977e-10	3.68044235543776e-07	337	Muscle	5067	2	mmu-miR-34a/mmu-miR-449a/mmu-miR-449c/mmu-miR-34b-5p/mmu-miR-34c/mmu-miR-449b
GUGGGGA	mmu-miR-491	3.46185432553163	0.000268233720895187	0.0627666906894738	66	Muscle	91	1	mmu-miR-491
UACAUAC	mmu-miR-466b-3p	8.52282500781092	7.78539763043876e-18	4.54667221617623e-15	369	Muscle	32	0	mmu-miR-466b-3p
UCUGCCU	mmu-miR-3110	3.98358299679309	3.39419740572847e-05	0.0102165341912427	135	Muscle	6	0	mmu-miR-3110
UGUGCUU	mmu-miR-218	8.59949051180893	4.00353811857922e-18	2.34607333748742e-15	522	Muscle	809	2	mmu-miR-218
UUAUUGA	mmu-miR-325	4.37241768381969	6.14390765696548e-06	0.00223023847947847	1211	Muscle	7	1	mmu-miR-325
UUGGCAA	mmu-miR-182	9.22262833979051	1.44952615516678e-20	8.6536711463457e-18	643	Muscle	17866	2	mmu-miR-182
UUGGCAC	mmu-miR-96	9.9189109513027	1.7224716391247e-23	1.04726275658782e-20	621	Muscle	121	2	mmu-miR-96
AACAUCC	mmu-miR-448-5p	4.97535357020501	3.25643258587324e-07	0.000141003530968311	105	Muscle	2	0	mmu-miR-448-5p
AACAUUC	mmu-miR-543	6.41406412662734	7.08452805168732e-11	3.70520817103247e-08	357	Muscle	249	1	mmu-miR-543
AGGUCAC	mmu-miR-1193-3p	4.48523935266655	3.64160648318968e-06	0.00139473528306165	136	Muscle	147	1	mmu-miR-1193-3p
AGUGGUU	mmu-miR-876-3p/mmu-miR-140	4.68688957592569	1.38694266436269e-06	0.00056309872173125	170	Muscle	3953	2	mmu-miR-876-3p/mmu-miR-140
CCAGUGU	mmu-miR-199a-5p	7.28598311729636	1.59666483956775e-13	8.95728974997505e-11	271	Muscle	35646	2	mmu-miR-199a-5p
CCCUGAG	mmu-miR-125a-5p/mmu-miR-351/mmu-miR-125b-5p	8.53692690155957	6.89193469510777e-18	4.03178179663805e-15	486	Muscle	351305	2	mmu-miR-125a-5p/mmu-miR-351/mmu-miR-125b-5p
CCCUGUC	mmu-miR-339-5p	4.78878519067905	8.38969872707473e-07	0.000350689406791724	96	Muscle	1358	1	mmu-miR-339-5p
GAGAACU	mmu-miR-146a/mmu-miR-146b	2.8991575265359	0.00187083428146357	0.31430015928588	104	Muscle	757463	2	mmu-miR-146a/mmu-miR-146b
GAGGUAG	mmu-miR-1961/mmu-let-7g/mmu-miR-98/mmu-let-7a/mmu-let-7b/mmu-let-7i/mmu-let-7d/mmu-let-7f/mmu-let-7e/mmu-let-7c	10.8708420320386	7.93645431049139e-28	4.88885585526269e-25	682	Muscle	1711813	2	mmu-miR-1961/mmu-let-7g/mmu-miR-98/mmu-let-7a/mmu-let-7b/mmu-let-7i/mmu-let-7d/mmu-let-7f/mmu-let-7e/mmu-let-7c
GAGGUAU	mmu-miR-202-3p	10.8374988075114	1.14318294451621e-27	7.0305751087747e-25	477	Muscle	11038	0	mmu-miR-202-3p
UCCCUGA	mmu-miR-670	8.13801184261847	2.00910774407697e-16	1.15724606058833e-13	385	Muscle	4	0	mmu-miR-670
AUUUAGA	mmu-miR-465a-5p/mmu-miR-465b-5p/mmu-miR-465c-5p	4.65952056630801	1.58473364789635e-06	0.000637062926454334	240	Muscle	36	0	mmu-miR-465a-5p/mmu-miR-465b-5p/mmu-miR-465c-5p
AUUCAUU	mmu-miR-664	6.19971811409346	2.82821888211933e-10	1.45653272429145e-07	269	Muscle	6783	0	mmu-miR-664
GGUGUGA	mmu-miR-1188	2.56535793252052	0.0051534709896671	0.633876931729053	68	Muscle	13	0	mmu-miR-1188
AUAAAUA	mmu-miR-466l-3p	14.2093051252597	4.01087599996621e-46	2.51883012797878e-43	1980	Muscle	0	0	mmu-miR-466l-3p
GGUCAGA	mmu-miR-540-3p	4.78378906265519	8.60106042867191e-07	0.000358664219875619	137	Muscle	327	0	mmu-miR-540-3p
UAAUACA	mmu-miR-374c	6.5989886368303	2.06986018837307e-11	1.10323548040285e-08	466	Muscle	1	1	mmu-miR-374c
AACAAAC	mmu-miR-1192/mmu-miR-495	8.4818684835988	1.10802988627254e-17	6.44873393810617e-15	465	Muscle	301	1	mmu-miR-1192/mmu-miR-495
AAGGCAC	mmu-miR-124	12.0903493391224	5.93902921824501e-34	3.70595423218489e-31	1110	Muscle	140	2	mmu-miR-124
AAUACUG	mmu-miR-200b/mmu-miR-429/mmu-miR-200c	10.3339337660193	2.4744243704365e-25	1.51434771470714e-22	644	Muscle	539	2	mmu-miR-200b/mmu-miR-429/mmu-miR-200c
ACAAUAU	mmu-miR-338-5p	9.60184500971047	3.92629964318669e-22	2.37541128412795e-19	503	Muscle	449	0	mmu-miR-338-5p
ACAGUAC	mmu-miR-101a/mmu-miR-101b	10.3617970989201	1.84972540790453e-25	1.13388167504548e-22	455	Muscle	135924	2	mmu-miR-101a/mmu-miR-101b
ACAGUAU	mmu-miR-144	9.93158405360329	1.51698441141302e-23	9.2536049096194e-21	477	Muscle	3506	2	mmu-miR-144
ACCCUGU	mmu-miR-10a/mmu-miR-10b	6.38728077270674	8.44307158171154e-11	4.40728336565343e-08	153	Muscle	20544665	2	mmu-miR-10a/mmu-miR-10b
ACUGUGU	mmu-miR-881	4.3653562126098	6.34578825768735e-06	0.00229082956102513	109	Muscle	6	0	mmu-miR-881
AGGAAAG	mmu-miR-1958	6.46518340741357	5.05880093957767e-11	2.6508116923387e-08	259	Muscle	11	0	mmu-miR-1958
AUAUAAC	mmu-miR-344d/mmu-miR-410/mmu-miR-344e	9.92556688064917	1.61133126678518e-23	9.81300741472176e-21	377	Muscle	9877	1	mmu-miR-344d/mmu-miR-410/mmu-miR-344e
AUUCAGA	mmu-miR-871-5p	4.09817758949753	2.08207874507376e-05	0.00657936883443308	233	Muscle	4	0	mmu-miR-871-5p
AUUGCAC	mmu-miR-25/mmu-miR-92a/mmu-miR-363-3p/mmu-miR-367/mmu-miR-32/mmu-miR-92b	10.5087505465502	3.93648325935615e-26	2.41700072124468e-23	535	Muscle	115788	2	mmu-miR-25/mmu-miR-92a/mmu-miR-363-3p/mmu-miR-367/mmu-miR-32/mmu-miR-92b
CACAGUG	mmu-miR-128	11.6763923127342	8.41437735349426e-32	5.23374271387343e-29	643	Muscle	19257	2	mmu-miR-128
CAGUGCA	mmu-miR-148a/mmu-miR-148b/mmu-miR-152	9.42021728343078	2.25077753292934e-21	1.35271729729054e-18	392	Muscle	395912	2	mmu-miR-148a/mmu-miR-148b/mmu-miR-152
CAGUGCU	mmu-miR-1960	7.27521593268205	1.72933382677803e-13	9.6669760916892e-11	302	Muscle	20	0	mmu-miR-1960
CAUGGAU	mmu-miR-490-5p	3.00203309364561	0.00134091509755066	0.244385087016484	64	Muscle	2	0	mmu-miR-490-5p
CUACAGU	mmu-miR-139-5p	5.53942656895855	1.51731827151245e-08	7.20726178968415e-06	190	Muscle	6938	2	mmu-miR-139-5p
GCUACAU	mmu-miR-222/mmu-miR-1928/mmu-miR-221	6.7351588193149	8.1875485886789e-12	4.41308868929793e-09	221	Muscle	12388	2	mmu-miR-222/mmu-miR-1928/mmu-miR-221
GGUUACC	mmu-miR-409-5p	2.94398759437702	0.00162006493477239	0.284197702474564	69	Muscle	762	1	mmu-miR-409-5p
GUAAACA	mmu-miR-30b/mmu-miR-30a/mmu-miR-30e/mmu-miR-384-5p/mmu-miR-30c/mmu-miR-30d	14.1030603973554	1.81825359859791e-45	1.14004500632089e-42	874	Muscle	7237329	2	mmu-miR-30b/mmu-miR-30a/mmu-miR-30e/mmu-miR-384-5p/mmu-miR-30c/mmu-miR-30d
GUGUGUG	mmu-miR-466k/mmu-miR-466i-5p/mmu-miR-466d-5p	6.55102816120861	2.85711403712089e-11	1.51712755371119e-08	247	Muscle	10	0	mmu-miR-466k/mmu-miR-466i-5p/mmu-miR-466d-5p
UAGAGGA	mmu-miR-877	4.39618737903305	5.50844198707267e-06	0.00202710665124274	62	Muscle	109	1	mmu-miR-877
UCAAGUA	mmu-miR-26b/mmu-miR-26a	11.0356043973171	1.28657794620534e-28	7.93818592808692e-26	578	Muscle	6110467	2	mmu-miR-26b/mmu-miR-26a
UCACAGC	mmu-miR-673-5p	11.2064917219886	1.89458058708464e-29	1.17085080281831e-26	537	Muscle	1411	0	mmu-miR-673-5p
UCACAGU	mmu-miR-27a/mmu-miR-27b	12.5016074934937	3.65784260192734e-36	2.28615162620459e-33	723	Muscle	1019876	2	mmu-miR-27a/mmu-miR-27b
UGCAGUC	mmu-miR-682	4.08397727356527	2.21356812492978e-05	0.0069284682310302	119	Muscle	0	2	mmu-miR-682
GCCACAC	mmu-miR-3064-3p	3.02065779640522	0.00126113121879436	0.233309275476956	107	Muscle	11	0	mmu-miR-3064-3p
CUUGUGU	mmu-miR-669d	3.16941530438838	0.000763729840506821	0.155037157622885	73	Muscle	11	0	mmu-miR-669d
UAUUGCU	mmu-miR-137	8.7136213423394	1.47159163518175e-18	8.66767473122049e-16	666	Muscle	13	2	mmu-miR-137
AAUGCCC	mmu-miR-365	5.63289782489604	8.86032278490142e-09	4.26181525953758e-06	157	Muscle	17531	2	mmu-miR-365
ACAUAGA	mmu-miR-376c	4.92590791067208	4.19847699573065e-07	0.000180114663116845	133	Muscle	722	1	mmu-miR-376c
AGGGAGG	mmu-miR-1943	5.2673136343979	6.92172909465267e-08	3.14938673806696e-05	119	Muscle	3201	0	mmu-miR-1943
AUAAAGU	mmu-miR-142-5p	7.89758161749096	1.42183399409078e-15	8.11867210625835e-13	443	Muscle	21429	2	mmu-miR-142-5p
CAGUAGU	mmu-miR-199a-3p	7.28211260215152	1.64316292643197e-13	9.20171238801903e-11	255	Muscle	227995	2	mmu-miR-199a-3p
GUAGUGU	mmu-miR-142-3p	5.44438977728257	2.59916402211076e-08	1.2086112702815e-05	206	Muscle	1539	2	mmu-miR-142-3p
AGCACCC	mmu-miR-3102	8.07053926038309	3.49941769493321e-16	2.00516633919673e-13	353	Muscle	1577	0	mmu-miR-3102
AUACAAG	mmu-miR-539-3p/mmu-miR-381	9.45678339597005	1.58780851636766e-21	9.55860726853329e-19	515	Muscle	15208	1	mmu-miR-539-3p/mmu-miR-381
CCUGUAC	mmu-miR-3107	3.9877128715856	3.33566679530571e-05	0.0100737137218232	72	Muscle	6526335	1	mmu-miR-3107
GCUGAGA	mmu-miR-883a-5p	4.10488778035262	2.0225559810735e-05	0.0064456888819711	145	Muscle	0	0	mmu-miR-883a-5p
AAAGCUG	mmu-miR-320	6.68987518418529	1.11680511756816e-11	6.00841153251671e-09	388	Muscle	5938	1	mmu-miR-320
ACAUGGC	mmu-miR-3082-3p	4.29267835271882	8.82653232274934e-06	0.00308928631296227	138	Muscle	729	0	mmu-miR-3082-3p
AAAGACA	mmu-miR-743a/mmu-miR-743b-3p	7.60832014139501	1.38840666058005e-14	7.84449763227729e-12	350	Muscle	7	0	mmu-miR-743a/mmu-miR-743b-3p
AAAUCUU	mmu-miR-1264-3p	6.63666906669311	1.60425442441771e-11	8.58276117063476e-09	312	Muscle	4	0	mmu-miR-1264-3p
AGAUUGU	mmu-miR-3086-5p	3.97168038969579	3.56837142978034e-05	0.0106694305750432	112	Muscle	43	0	mmu-miR-3086-5p
AGCACCA	mmu-miR-29a/mmu-miR-29b/mmu-miR-29c	11.2772062661273	8.50305799533877e-30	5.2633928991147e-27	670	Muscle	125992	2	mmu-miR-29a/mmu-miR-29b/mmu-miR-29c
AGGUAGU	mmu-miR-196b/mmu-miR-196a	6.20851056478659	2.67445637260897e-10	1.38001948826623e-07	162	Muscle	67667	2	mmu-miR-196b/mmu-miR-196a
CAACAAA	mmu-miR-3065	6.47701773118959	4.67766015625359e-11	2.45577158203314e-08	339	Muscle	36	0	mmu-miR-3065
CAAGAGC	mmu-miR-335-5p	3.9358398782905	4.14531194617335e-05	0.0122286702412114	117	Muscle	12264	1	mmu-miR-335-5p
CUGGCUC	mmu-miR-149	5.27870035263828	6.5051679539614e-08	2.9663565870064e-05	196	Muscle	14507	1	mmu-miR-149
GCAUCUG	mmu-miR-3089-3p	3.32524070862691	0.000441711144473911	0.0980598740732083	146	Muscle	42	0	mmu-miR-3089-3p
GGAGAGA	mmu-miR-185/mmu-miR-882/mmu-miR-3473	4.10511235103345	2.02059212600975e-05	0.0064456888819711	105	Muscle	2324	1	mmu-miR-185/mmu-miR-882/mmu-miR-3473
GGCUCAG	mmu-miR-24	6.27807721139687	1.71392844116676e-10	8.8781493252438e-08	324	Muscle	77612	2	mmu-miR-24
GGCUCAU	mmu-miR-3106	5.6884805182737	6.40873656367992e-09	3.11464596994844e-06	199	Muscle	0	0	mmu-miR-3106
GUGACAG	mmu-miR-542-3p	3.11026568235437	0.000934595666188693	0.179442367908229	113	Muscle	2573	1	mmu-miR-542-3p
UCACAUU	mmu-miR-23a/mmu-miR-23b	8.87577451804673	3.47242070444278e-19	2.05220063632568e-16	616	Muscle	148595	2	mmu-miR-23a/mmu-miR-23b
UGCAUUG	mmu-miR-33	5.07049121247296	1.98395118848778e-07	8.74922474123113e-05	199	Muscle	96	2	mmu-miR-33
UCCCUUU	mmu-miR-211/mmu-miR-204	7.02531576904198	1.06791329847387e-12	5.90556054056049e-10	323	Muscle	19046	2	mmu-miR-211/mmu-miR-204
AAUCUCA	mmu-miR-216a	4.26758420450351	9.88005967965997e-06	0.00343826076852167	111	Muscle	2	2	mmu-miR-216a
AUACAUG	mmu-miR-466n-3p	7.54131842873955	2.32621760414523e-14	1.30966051113376e-11	399	Muscle	3	0	mmu-miR-466n-3p
CUGAGUC	mmu-miR-1199	3.55194121234444	0.000191200143128193	0.0470352352095355	117	Muscle	155	0	mmu-miR-1199
GAGAAAU	mmu-miR-539-5p	5.5005275873159	1.89328249388948e-08	8.93629337115834e-06	304	Muscle	275	0	mmu-miR-539-5p
GCACCCC	mmu-miR-3093-5p	5.90847037330698	1.72649448236578e-09	8.63247241182889e-07	69	Muscle	0	0	mmu-miR-3093-5p
UAUACAU	mmu-miR-669m-3p	8.88235746631819	3.27290458350075e-19	1.93755951343244e-16	601	Muscle	5	0	mmu-miR-669m-3p
CACUGAG	mmu-miR-674/mmu-miR-3473d	7.13453035421837	4.85590912293227e-13	2.70474138147328e-10	170	Muscle	771	0	mmu-miR-674/mmu-miR-3473d
CUGGACU	mmu-miR-378	3.29997504031839	0.000483467138926772	0.105395836286036	76	Muscle	1573540	1	mmu-miR-378
GUCAACA	mmu-miR-505-3p	3.43358283827664	0.000297830079621288	0.0687987483925176	114	Muscle	73	1	mmu-miR-505-3p
GUUCUCA	mmu-miR-3067	4.03702685654794	2.70664369511359e-05	0.00825526327009646	106	Muscle	5	0	mmu-miR-3067
UCCAGUU	mmu-miR-145	7.54681539193724	2.23015057352279e-14	1.25780492346685e-11	385	Muscle	59478	2	mmu-miR-145
UGAUGUC	mmu-miR-3073-3p	2.98503775298607	0.00141771663194251	0.256606710381595	61	Muscle	15	0	mmu-miR-3073-3p
GGAAUGU	mmu-miR-1a/mmu-miR-206	11.4419336088872	1.29034442184622e-30	8.01303885966501e-28	480	Muscle	10746767	2	mmu-miR-1a/mmu-miR-206
GGUGCCA	mmu-miR-3085-5p	1.85431999637037	0.031846696488755	1	79	Muscle	3	0	mmu-miR-3085-5p
UGGUCAC	mmu-miR-3073-5p	6.52230002757921	3.4618670405828e-11	1.8313276644683e-08	198	Muscle	4	0	mmu-miR-3073-5p
UUGGUCC	mmu-miR-133a/mmu-miR-133b	9.26740135406223	9.53680852147745e-21	5.70301149584351e-18	382	Muscle	68839	2	mmu-miR-133a/mmu-miR-133b
UAAAGGC	mmu-miR-1971/mmu-miR-1981	4.90544937177793	4.6606841332523e-07	0.000199477280903199	210	Muscle	499	0	mmu-miR-1971/mmu-miR-1981
AAAGAAU	mmu-miR-186	5.67872251885961	6.78522065210896e-09	3.28404679562074e-06	378	Muscle	152715	1	mmu-miR-186
AGCAGCG	mmu-miR-503	6.81072888195511	4.85527418138867e-12	2.62184805794988e-09	213	Muscle	44	1	mmu-miR-503
GAGGCUG	mmu-miR-1962/mmu-miR-485	5.85216373816542	2.42609286396571e-09	1.20576815339096e-06	146	Muscle	319	1	mmu-miR-1962/mmu-miR-485
ACAUUAC	mmu-miR-323-3p	6.51798675152364	3.56286420889695e-11	1.87762943808869e-08	297	Muscle	81	1	mmu-miR-323-3p
AGGCUCU	mmu-miR-344g-3p	3.09177822210206	0.000994807177422733	0.189013363710319	73	Muscle	18	0	mmu-miR-344g-3p
AUUAUUA	mmu-miR-126-5p	5.5520725638146	1.41151177737358e-08	6.71879606029825e-06	294	Muscle	170119	0	mmu-miR-126-5p
CAGCCAC	mmu-miR-3058	4.57889423381094	2.33720235587988e-06	0.000920857728216671	144	Muscle	37	0	mmu-miR-3058
CAGUCUC	mmu-miR-452-3p	4.52864529791558	2.96815270045934e-06	0.00115757955317914	140	Muscle	1	1	mmu-miR-452-3p
CCUUGGC	mmu-miR-212-5p	4.72113753881554	1.17264636976239e-06	0.000481957657972344	141	Muscle	173	2	mmu-miR-212-5p
GAAAGGU	mmu-miR-471-3p	4.21660682647555	1.24002913957583e-05	0.00421609907455783	125	Muscle	0	0	mmu-miR-471-3p
GAGCAAG	mmu-miR-3105-5p	3.69767649772137	0.000108790965197945	0.0289383967426533	126	Muscle	1	0	mmu-miR-3105-5p
GCCCCUG	mmu-miR-3070b-5p	3.91798682826492	4.46457920553545e-05	0.0129919254881082	73	Muscle	2	0	mmu-miR-3070b-5p
GGCUGGG	mmu-miR-3083	5.88462724759673	1.99476049261982e-09	9.95385485817289e-07	221	Muscle	4	0	mmu-miR-3083
GGGCCUG	mmu-miR-3091-3p/mmu-miR-2861	3.18389223157816	0.000726545500487335	0.148215282099416	93	Muscle	20	0	mmu-miR-3091-3p/mmu-miR-2861
UCUUGGA	mmu-miR-470	3.92586604313967	4.32091209184851e-05	0.0127034815500346	139	Muscle	24	0	mmu-miR-470
UGAAAGG	mmu-miR-488	3.6901532305822	0.00011205950570848	0.0296957690127471	164	Muscle	213	1	mmu-miR-488
UUUGCAG	mmu-miR-450b-5p	6.87515958085079	3.09602516355251e-12	1.69042973929967e-09	244	Muscle	1497	0	mmu-miR-450b-5p
UUUUUGC	mmu-miR-129-5p	6.8434955795813	3.86418552854919e-12	2.09825274200221e-09	264	Muscle	33	2	mmu-miR-129-5p
AGUGCAA	mmu-miR-130a/mmu-miR-721/mmu-miR-301a/mmu-miR-130b/mmu-miR-301b	9.73350298870964	1.08494509686208e-22	6.57476728698419e-20	492	Muscle	30500	2	mmu-miR-130a/mmu-miR-721/mmu-miR-301a/mmu-miR-130b/mmu-miR-301b
GCUGGUG	mmu-miR-138	7.26363092120297	1.88417675701738e-13	1.0513706304157e-10	316	Muscle	581	2	mmu-miR-138
GUGCAAA	mmu-miR-19a/mmu-miR-19b	10.327458428058	2.6472413941106e-25	1.61746449180158e-22	670	Muscle	11120	2	mmu-miR-19a/mmu-miR-19b
ACUGCAU	mmu-miR-217	5.31854804147833	5.22993015555596e-08	2.39530801124463e-05	169	Muscle	12	2	mmu-miR-217
GACACCU	mmu-miR-667	3.16337717205256	0.000779750716749613	0.157509644783422	60	Muscle	174	0	mmu-miR-667
UCUGCCA	mmu-miR-3084	3.29866225443209	0.000485733594516686	0.105404190010121	154	Muscle	706	0	mmu-miR-3084
UGCAUAG	mmu-miR-153	9.31776883636111	5.94061947134142e-21	3.56437168280485e-18	447	Muscle	45	2	mmu-miR-153
UGCAUAU	mmu-miR-448-3p	8.74267732694032	1.13825085377444e-18	6.71568003726918e-16	401	Muscle	9	1	mmu-miR-448-3p
AAUCUCU	mmu-miR-216b	5.87723330620527	2.08590026429131e-09	1.03877833161707e-06	123	Muscle	0	2	mmu-miR-216b
CUCAAAC	mmu-miR-290-5p/mmu-miR-292-5p	3.8692254272183	5.45908299539751e-05	0.0155583865368829	152	Muscle	2	1	mmu-miR-290-5p/mmu-miR-292-5p
CUCAUUU	mmu-miR-3071	4.45636446865371	4.16806305528248e-06	0.00158386396100734	211	Muscle	3	0	mmu-miR-3071
GCAUAUA	mmu-miR-669i/mmu-miR-669j	6.13716329350493	4.20040117587907e-10	2.15227658667575e-07	235	Muscle	0	0	mmu-miR-669i/mmu-miR-669j
AGCCCUU	mmu-miR-129-1-3p/mmu-miR-129-2-3p	5.8484167145403	2.48137007351211e-09	1.2282781863885e-06	231	Muscle	49	2	mmu-miR-129-1-3p/mmu-miR-129-2-3p
AAGUGCC	mmu-miR-467a/mmu-miR-290-3p/mmu-miR-292-3p	6.11905233700117	4.70667430536814e-10	2.40511057004312e-07	223	Muscle	72	0	mmu-miR-467a/mmu-miR-290-3p/mmu-miR-292-3p
AGCAUUG	mmu-miR-1955-3p	4.3148407285165	7.98590067719471e-06	0.00281103703837254	111	Muscle	76	0	mmu-miR-1955-3p
AUGGCUU	mmu-miR-135a/mmu-miR-135b	7.75791872127584	4.31672247508058e-15	2.45621508832085e-12	421	Muscle	114	2	mmu-miR-135a/mmu-miR-135b
CAUAGAA	mmu-miR-3112	5.68938410854263	6.3749192241833e-09	3.10458566217727e-06	183	Muscle	0	0	mmu-miR-3112
CAUGACA	mmu-miR-878-3p	3.52722565712313	0.000209969348548927	0.0510225516973892	100	Muscle	3	0	mmu-miR-878-3p
CUCUGGG	mmu-miR-330/mmu-miR-326	5.49702768198574	1.9312304374652e-08	9.09609536046111e-06	185	Muscle	962	1	mmu-miR-330/mmu-miR-326
UAAUGCU	mmu-miR-155	4.09529894820855	2.1081199104e-05	0.00664057771776	210	Muscle	5291	2	mmu-miR-155
UAUAAAG	mmu-miR-340-5p	9.50213277477246	1.02817384250929e-21	6.199888270331e-19	795	Muscle	22487	1	mmu-miR-340-5p
UCAUUCG	mmu-miR-1298	2.51735448072724	0.00591199006840131	0.691702838002953	79	Muscle	38	1	mmu-miR-1298
UUCCUAG	mmu-miR-384-3p	4.33586292350452	7.25947029257479e-06	0.00258437142415662	135	Muscle	66	1	mmu-miR-384-3p
AAGUCAC	mmu-miR-224	5.44047540279619	2.65692883270973e-08	1.23281497837732e-05	176	Muscle	519	1	mmu-miR-224
AUCUUAG	mmu-miR-1941-3p	3.55569398855628	0.000188491332405956	0.0467458504366771	58	Muscle	23	0	mmu-miR-1941-3p
CUCACCC	mmu-miR-1982.1	4.37360511322783	6.11056793449532e-06	0.0022242467281563	64	Muscle	103	0	mmu-miR-1982.1
GCAUCCC	mmu-miR-324-5p	3.5685262632543	0.000179497436408822	0.0450538565386143	66	Muscle	4533	1	mmu-miR-324-5p
UAAGUGU	mmu-miR-467e/mmu-miR-467h	4.14329501759354	1.71175538019785e-05	0.00558032253944498	122	Muscle	51	0	mmu-miR-467e/mmu-miR-467h
UCAUGAG	mmu-miR-3088	2.79292246190176	0.00261171054698674	0.404815134782945	119	Muscle	1	0	mmu-miR-3088
UCAUGAU	mmu-miR-433	4.19850031742472	1.34344238478106e-05	0.00448709756516873	173	Muscle	642	1	mmu-miR-433
UUGGUAC	mmu-miR-547	6.85345311576477	3.60441427885381e-12	1.96440578197533e-09	268	Muscle	35	0	mmu-miR-547
GGAAGCC	mmu-miR-671-5p	4.55677808980795	2.59721261163248e-06	0.00101810734375993	155	Muscle	494	0	mmu-miR-671-5p
UGCCCUG	mmu-miR-874	4.45232767591392	4.24722026347565e-06	0.00160969647985727	117	Muscle	1048	1	mmu-miR-874
AAGUGCA	mmu-miR-291b-3p	9.30974598626168	6.40692149656797e-21	3.83774597644421e-18	505	Muscle	349	0	mmu-miR-291b-3p
AUCAAAG	mmu-miR-291a-5p/mmu-miR-291b-5p	7.97764186291863	7.45777142459027e-16	4.26584525486563e-13	385	Muscle	3	0	mmu-miR-291a-5p/mmu-miR-291b-5p
AUGGCAC	mmu-miR-183	5.44901052692928	2.53254078694256e-08	1.18016400671523e-05	247	Muscle	4647	2	mmu-miR-183
CUCACAC	mmu-miR-342-3p	4.73746058432073	1.08206465669234e-06	0.000445810638557246	135	Muscle	8462	1	mmu-miR-342-3p
GAGGUUG	mmu-miR-672	4.33785399491656	7.19403398863113e-06	0.00256827013394131	97	Muscle	159	0	mmu-miR-672
UAAGACG	mmu-miR-208b/mmu-miR-208a-3p	3.37938650937645	0.000363238974411134	0.0820920082169162	107	Muscle	8094	2	mmu-miR-208b/mmu-miR-208a-3p
UAAGACU	mmu-miR-499	3.73757953020719	9.29001638998901e-05	0.0248043437612707	173	Muscle	1299	2	mmu-miR-499
UCACAAA	mmu-miR-350	8.49373979914937	1.00046001142953e-17	5.83268186663413e-15	508	Muscle	954	0	mmu-miR-350
UCUAGGA	mmu-miR-1929	3.97576702448261	3.50763892737212e-05	0.0105229167821164	80	Muscle	7	0	mmu-miR-1929
UUGUGAC	mmu-miR-758	2.82400539978852	0.002371379291795	0.377049307395406	113	Muscle	25	1	mmu-miR-758
UCUCUAA	mmu-miR-3108	3.8503428596142	5.89762943945582e-05	0.01669029131366	132	Muscle	20	0	mmu-miR-3108
GUCUGCC	mmu-miR-346	3.64185774426665	0.00013533882179783	0.0350527548456379	65	Muscle	5	1	mmu-miR-346
GUCUUGC	mmu-miR-431	3.66533666189502	0.00012350671209031	0.0323587585676613	76	Muscle	490	1	mmu-miR-431
GUUUUGU	mmu-miR-669b	5.47178767037413	2.2275921332195e-08	1.04251311834673e-05	192	Muscle	9	0	mmu-miR-669b
UAUCAGA	mmu-miR-361	3.14093290986208	0.000842053032444936	0.167827518427422	112	Muscle	12349	1	mmu-miR-361
CAGGAAC	mmu-miR-873	3.8324262281476	6.34428275869851e-05	0.0178274345519428	141	Muscle	3	1	mmu-miR-873
GAGGCUU	mmu-miR-879	3.37788393506719	0.000365229521632243	0.0821766423672547	87	Muscle	71	0	mmu-miR-879
AAGGUGC	mmu-miR-18a/mmu-miR-18b	4.85187377381773	6.11502280016347e-07	0.000258053962166899	140	Muscle	237	2	mmu-miR-18a/mmu-miR-18b
AAGUGCG	mmu-miR-467c/mmu-miR-467d	4.47341750570292	3.84896322610498e-06	0.0014703039523721	116	Muscle	68	0	mmu-miR-467c/mmu-miR-467d
AGGGGGC	mmu-miR-3104-5p	3.24085727022055	0.000595854178029941	0.125725231564318	28	Muscle	4	0	mmu-miR-3104-5p
CUCCCAA	mmu-miR-150/mmu-miR-5127	4.63941351618348	1.74699655931918e-06	0.00069879862372767	137	Muscle	23751	2	mmu-miR-150/mmu-miR-5127
CUCCCAC	mmu-miR-532-3p	4.5099122358019	3.24272255920958e-06	0.00125493363041411	117	Muscle	442	1	mmu-miR-532-3p
GCACUCU	mmu-miR-3076-3p	3.49771105831378	0.000234634619851338	0.0553737702849157	65	Muscle	37	0	mmu-miR-3076-3p
GUCUGGG	mmu-miR-3075	3.35873623597373	0.000391498820681748	0.0876957358327115	88	Muscle	5	0	mmu-miR-3075
UCUGCUG	mmu-miR-3098-3p	4.77655731982278	8.91608697962676e-07	0.00037001760965451	183	Muscle	37	0	mmu-miR-3098-3p
ACAGGGG	mmu-miR-3076-5p	3.88146572043842	5.19143945661572e-05	0.0149513456350533	66	Muscle	2	0	mmu-miR-3076-5p
AGCAGCA	mmu-miR-497/mmu-miR-195/mmu-miR-15a/mmu-miR-16/mmu-miR-322/mmu-miR-1907/mmu-miR-15b	9.04780189360024	7.29375641167576e-20	4.33978506494708e-17	735	Muscle	500231	2	mmu-miR-497/mmu-miR-195/mmu-miR-15a/mmu-miR-16/mmu-miR-322/mmu-miR-1907/mmu-miR-15b
AGGUAGA	mmu-miR-1839-5p	5.85157791133925	2.43465543631216e-09	1.20758909641083e-06	206	Muscle	10640	0	mmu-miR-1839-5p
GCAGCAU	mmu-miR-103/mmu-miR-107	6.66350473376586	1.33686715230402e-11	7.17897660787257e-09	336	Muscle	50388	2	mmu-miR-103/mmu-miR-107
GCUGCAG	mmu-miR-666-3p	3.21876746184665	0.000643714216103612	0.133892556949551	197	Muscle	60	0	mmu-miR-666-3p
AACUCAC	mmu-miR-3087	4.56178174440335	2.53606782827483e-06	0.000996674656512007	84	Muscle	1	0	mmu-miR-3087
ACAGGUG	mmu-miR-3097-5p	4.86414391683119	5.74766260250901e-07	0.000243126128086131	109	Muscle	3	0	mmu-miR-3097-5p
AGCUGCC	mmu-miR-22	7.1060541009837	5.97038113980358e-13	3.31953191373079e-10	256	Muscle	4362039	2	mmu-miR-22
AGGAGCU	mmu-miR-28/mmu-miR-708	4.13008360958414	1.81315664512521e-05	0.00587462753020568	88	Muscle	8149	1	mmu-miR-28/mmu-miR-708
AGGUGGA	mmu-miR-363-5p	1.82266888152887	0.034176778061823	1	56	Muscle	27	0	mmu-miR-363-5p
AUGCAAG	mmu-miR-300	4.12986783063838	1.81485921098762e-05	0.00587462753020568	191	Muscle	5918	0	mmu-miR-300
AUUUAGC	mmu-miR-344b	3.58015942000563	0.000171692322620203	0.0434381576229114	156	Muscle	9	0	mmu-miR-344b
CUGCUUA	mmu-miR-3105-3p	4.00313455863558	3.1254362753251e-05	0.00947007191423505	111	Muscle	0	0	mmu-miR-3105-3p
GACUGGC	mmu-miR-871-3p	2.98270259595345	0.00142857740040665	0.257143932073196	64	Muscle	43	0	mmu-miR-871-3p
GAGUGUG	mmu-miR-574-5p	4.40363662818953	5.32255946051665e-06	0.00196934700039116	70	Muscle	710	0	mmu-miR-574-5p
GAGUUCA	mmu-miR-3089-5p	4.21093118291054	1.27160108014414e-05	0.00428629654279826	93	Muscle	1	0	mmu-miR-3089-5p
GAUAUGU	mmu-miR-190/mmu-miR-190b	4.40033563345812	5.40417855840866e-06	0.0019941418880528	81	Muscle	3587	2	mmu-miR-190/mmu-miR-190b
GGACGGA	mmu-miR-184	3.13732573769948	0.000852482958937334	0.168791625869592	13	Muscle	324	2	mmu-miR-184
GGAGUGU	mmu-miR-122	2.65603226474473	0.00395330245957267	0.544997687044333	97	Muscle	589	2	mmu-miR-122
UCACACA	mmu-miR-377	5.18261334616416	1.09399158609108e-07	4.92296213740987e-05	272	Muscle	1551	1	mmu-miR-377
UCAGACC	mmu-miR-3097-3p	3.00516111325567	0.00132720102734639	0.244204989031736	79	Muscle	1	0	mmu-miR-3097-3p
UGAGGAC	mmu-miR-1224	2.79990431031695	0.00255588785895815	0.398718505997472	64	Muscle	17	1	mmu-miR-1224
UGGAGUU	mmu-miR-3068	4.60083027876097	2.10405102759989e-06	0.000835308257957158	78	Muscle	862	0	mmu-miR-3068
UGGCCCU	mmu-miR-328	2.25164057156066	0.0121724974948411	1	90	Muscle	15463	1	mmu-miR-328
CUUGUUA	mmu-miR-544-5p	2.82277016327943	0.00238053447659506	0.377049307395406	108	Muscle	4	1	mmu-miR-544-5p
GUCAGGC	mmu-miR-344g-5p	4.24152149366935	1.11004812018185e-05	0.00380543061186048	73	Muscle	23	0	mmu-miR-344g-5p
AAAGCCA	mmu-miR-742	7.00797178202614	1.20898778054225e-12	6.66549802913314e-10	342	Muscle	0	0	mmu-miR-742
AACCUGG	mmu-miR-490-3p	4.35692867842729	6.59501120298905e-06	0.00236760902187307	91	Muscle	97	2	mmu-miR-490-3p
ACAGAAC	mmu-miR-1912	8.30825590881244	4.85594526495686e-17	2.80673636314506e-14	409	Muscle	4	0	mmu-miR-1912
UGACCUA	mmu-miR-192/mmu-miR-215	2.57917665167694	0.00495180636253642	0.623927601679589	69	Muscle	52497	2	mmu-miR-192/mmu-miR-215
CAUAACA	mmu-miR-669a-3-3p/mmu-miR-669a-3p	3.80611682353444	7.05828615311585e-05	0.0194808697825998	107	Muscle	92	0	mmu-miR-669a-3-3p/mmu-miR-669a-3p
CCCACAG	mmu-miR-3057-3p	4.62334926821145	1.88796573826789e-06	0.000753298329568888	183	Muscle	28	0	mmu-miR-3057-3p
GGAAGAC	mmu-miR-7a/mmu-miR-7b	6.51453432006508	3.64577549128538e-11	1.91767790841611e-08	245	Muscle	3226	2	mmu-miR-7a/mmu-miR-7b
GGCUCUG	mmu-miR-760-3p	5.16219493360968	1.2203546498371e-07	5.44278173827348e-05	195	Muscle	7	1	mmu-miR-760-3p
GUCCCAG	mmu-miR-1955-5p	3.61436122351646	0.000150544518430856	0.03868994123673	109	Muscle	181	0	mmu-miR-1955-5p
AUAAUAC	mmu-miR-369-3p	8.33591325644356	3.84511426850265e-17	2.22632116146304e-14	369	Muscle	1422	1	mmu-miR-369-3p
AUGUGUU	mmu-miR-1198-5p	4.44280081748749	4.43976801737343e-06	0.00167379254254978	81	Muscle	1345	0	mmu-miR-1198-5p
GGCAAGA	mmu-miR-31	5.99502938467036	1.01724325573521e-09	5.12690600890546e-07	201	Muscle	118	2	mmu-miR-31
GGGAGAU	mmu-miR-1941-5p	1.43964310967689	0.0749841982010298	1	64	Muscle	15	0	mmu-miR-1941-5p
GUGUGCA	mmu-miR-466j/mmu-miR-466h-5p/mmu-miR-466m-5p	3.55388489999732	0.000189792650274365	0.046878784617768	137	Muscle	28	0	mmu-miR-466j/mmu-miR-466h-5p/mmu-miR-466m-5p
UCAACAG	mmu-miR-421	4.25180929434979	1.06025198575505e-05	0.00365786935085491	201	Muscle	3069	1	mmu-miR-421
UGUGUGC	mmu-miR-466n-5p	4.61092707432918	2.00438580474039e-06	0.000797745550286676	81	Muscle	2	0	mmu-miR-466n-5p
AACAGUC	mmu-miR-132/mmu-miR-212-3p	5.99449765670126	1.02057704516587e-09	5.13350253718434e-07	211	Muscle	1016	2	mmu-miR-132/mmu-miR-212-3p
ACUCAGU	mmu-miR-201	3.2490637443858	0.000578927642925855	0.123311587943207	70	Muscle	36	0	mmu-miR-201
AUGCACC	mmu-miR-500/mmu-miR-501-3p	5.4185296624607	3.00455852863494e-08	1.38810604022934e-05	123	Muscle	4293	1	mmu-miR-500/mmu-miR-501-3p
CAGUCCA	mmu-miR-455	3.77174988800658	8.10533516219048e-05	0.0222086183444019	165	Muscle	775	2	mmu-miR-455
GGUCCUC	mmu-miR-1264-5p	3.8195454220213	6.68489194912647e-05	0.0186508485380629	102	Muscle	6	0	mmu-miR-1264-5p
AGGACAC	mmu-miR-1197	4.41849676943067	4.96948828117148e-06	0.00184864964059579	97	Muscle	41	1	mmu-miR-1197
CAGCAGG	mmu-miR-214/mmu-miR-761	6.52006748455143	3.51378831565194e-11	1.85528023066422e-08	347	Muscle	3657	0	mmu-miR-214/mmu-miR-761
CCAGCAU	mmu-miR-338-3p	4.0569001533862	2.48641640868275e-05	0.00770789086691654	146	Muscle	15218	2	mmu-miR-338-3p
GAUCUAG	mmu-miR-344/mmu-miR-344c	2.88925581673651	0.00193077393007391	0.32050847239227	29	Muscle	9	0	mmu-miR-344/mmu-miR-344c
GCAAGGU	mmu-miR-679-3p	4.19778556595567	1.34768833149609e-05	0.00448780214388198	93	Muscle	9	0	mmu-miR-679-3p
GGACGAG	mmu-miR-1947	1.29613761233288	0.0974640393689941	1	6	Muscle	415	0	mmu-miR-1947
UUCCUGC	mmu-miR-3074-5p	6.54999357190436	2.87697800821218e-11	1.52479834435246e-08	200	Muscle	40	0	mmu-miR-3074-5p
UCCUGGC	mmu-miR-3113	4.46865124909292	3.93571726858101e-06	0.00149950827932936	140	Muscle	5	0	mmu-miR-3113
UUGGAGC	mmu-miR-3057-5p	4.52047162748409	3.08510073082906e-06	0.0012001041842925	81	Muscle	746	0	mmu-miR-3057-5p
AACUGCA	mmu-miR-883a-3p/mmu-miR-883b-3p	4.33281116680296	7.3608687125408e-06	0.00261105417524599	195	Muscle	1	0	mmu-miR-883a-3p/mmu-miR-883b-3p
ACUCCAU	mmu-miR-880	3.27548348240676	0.000527406412008353	0.112864972169787	73	Muscle	3	0	mmu-miR-880
ACAGAGU	mmu-miR-3082-5p	4.99698126233844	2.91173622589777e-07	0.000126660525826553	159	Muscle	6	0	mmu-miR-3082-5p
AGCUUUU	mmu-miR-208a-5p	5.5884012484115	1.14584818194779e-08	5.46569582789096e-06	242	Muscle	23	0	mmu-miR-208a-5p
AGGUUAC	mmu-miR-872	4.69071914613186	1.36123229830637e-06	0.000556744010007305	62	Muscle	2687	0	mmu-miR-872
CCUUCAU	mmu-miR-205	6.9872558926349	1.40157351281082e-12	7.70865432045952e-10	242	Muscle	378	2	mmu-miR-205
GGUGCUA	mmu-miR-3070a/mmu-miR-3070b-3p	2.94500261377213	0.00161475967315093	0.284197702474564	75	Muscle	2	0	mmu-miR-3070a/mmu-miR-3070b-3p
CAUAGCA	mmu-miR-3060	4.83494848184435	6.65900610685547e-07	0.000280344157098615	127	Muscle	86	0	mmu-miR-3060
GAAUUGU	mmu-miR-219-3p	3.39748992529188	0.000340035460265661	0.077188049480305	68	Muscle	12	1	mmu-miR-219-3p
GAGUAUU	mmu-miR-496	2.29245827520302	0.0109396063031625	1	63	Muscle	235	1	mmu-miR-496
UAGUUGU	mmu-miR-669c	1.91584406611476	0.0276924734219442	1	66	Muscle	48	0	mmu-miR-669c
UUAGGCA	mmu-miR-1948	5.42981391961273	2.82064204307063e-08	1.3059572659417e-05	143	Muscle	21	0	mmu-miR-1948
UACCUUU	mmu-miR-3061-3p	4.42845550234697	4.74551471584353e-06	0.00177007698900964	145	Muscle	1155	0	mmu-miR-3061-3p
UGUGUGU	mmu-miR-466l-5p	4.89783667584479	4.84487599164821e-07	0.000206876204843378	164	Muscle	0	0	mmu-miR-466l-5p
AGGGCCA	mmu-miR-3109	2.10076720892602	0.0178307031277174	1	59	Muscle	25	0	mmu-miR-3109
CCUCCAU	mmu-miR-1930	2.58893658667488	0.00481364107367064	0.611332416356172	83	Muscle	12	0	mmu-miR-1930
UCAUAGA	mmu-miR-376b	4.30758028672332	8.25250971602576e-06	0.00289663091032504	108	Muscle	171	1	mmu-miR-376b
AUCACUA	mmu-miR-34b-3p	2.48727930039979	0.00643621475059902	0.746600911069486	69	Muscle	112	0	mmu-miR-34b-3p
CCUGCUG	mmu-miR-370	4.67667646718347	1.45780853012696e-06	0.00059041245470142	165	Muscle	128	1	mmu-miR-370
AUAUCAG	mmu-miR-3074-1-3p	3.51713099283944	0.000218119219492776	0.0519123742392806	94	Muscle	16	0	mmu-miR-3074-1-3p
AUGACAC	mmu-miR-425/mmu-miR-489	4.44197344858339	4.45687807115032e-06	0.00167578615475252	106	Muscle	15882	2	mmu-miR-425/mmu-miR-489
AUGUGGG	mmu-miR-299	2.17232598741576	0.0149155416022055	1	51	Muscle	833	1	mmu-miR-299
GGACACU	mmu-miR-3095-3p	4.02229683669893	2.88166802059539e-05	0.00876027078260999	74	Muscle	22	0	mmu-miR-3095-3p
GGAGCCA	mmu-miR-505-5p	3.21341540588317	0.00065583215151978	0.135101423213075	98	Muscle	39	0	mmu-miR-505-5p
GUUGGGG	mmu-miR-3094	3.00327891672841	0.00133543763396986	0.244385087016484	37	Muscle	0	0	mmu-miR-3094
AGGUUAU	mmu-miR-154	2.64389495240318	0.0040979043697605	0.553217089917668	73	Muscle	487	1	mmu-miR-154
CCUAACA	mmu-miR-3098-5p	2.21354619934334	0.0134300059015407	1	69	Muscle	109	0	mmu-miR-3098-5p
GGGAAAG	mmu-miR-1953	4.16794600502971	1.53678357363765e-05	0.00507138579300423	163	Muscle	13	0	mmu-miR-1953
GUAACAG	mmu-miR-194	5.82829692789465	2.79979408071368e-09	1.38309827587256e-06	203	Muscle	2510	2	mmu-miR-194
AGUAGAC	mmu-miR-411	3.28021691999414	0.000518636501753958	0.111506847877101	40	Muscle	23481	1	mmu-miR-411
UUCCUCU	mmu-miR-3059	4.48803877117085	3.59409245708459e-06	0.00138013150352048	185	Muscle	14	0	mmu-miR-3059
ACUGGCC	mmu-miR-193/mmu-miR-193b	5.03859029732114	2.34486578101662e-07	0.000102939607786629	119	Muscle	19510	2	mmu-miR-193/mmu-miR-193b
AGUCAUG	mmu-miR-707	3.10470257974356	0.000952352227022507	0.181899275361299	90	Muscle	7	0	mmu-miR-707
GAGGGGC	mmu-miR-423-5p	3.51379369120929	0.000220877884481731	0.0523480586221703	74	Muscle	10124	1	mmu-miR-423-5p
UUGGGAA	mmu-miR-450b-3p	5.13762591669118	1.39115518300501e-07	6.17672901254224e-05	131	Muscle	61	0	mmu-miR-450b-3p
AGUGCUU	mmu-miR-302c	7.84753788448511	2.12142134183831e-15	1.20921016484784e-12	311	Muscle	19	2	mmu-miR-302c
UGUGCGG	mmu-miR-147	-0.189081451028507	0.425014489593306	1	11	Muscle	22	2	mmu-miR-147
UGUGCGU	mmu-miR-210	-0.161078202422743	0.436015903997449	1	13	Muscle	985	2	mmu-miR-210
CUCCAUU	mmu-miR-136	3.81569938892449	6.78988741165877e-05	0.0188758870044114	121	Muscle	11239	1	mmu-miR-136
GUCUUGU	mmu-miR-669e	2.88243071475129	0.00197309955003523	0.324927533178309	73	Muscle	7	0	mmu-miR-669e
GAGAAUG	mmu-miR-3062	5.7449063516575	4.59859366902009e-09	2.24871230415083e-06	127	Muscle	2	0	mmu-miR-3062
AUGUGUA	mmu-miR-511-3p	4.44113827902001	4.47421333532783e-06	0.00167783000074794	99	Muscle	462	0	mmu-miR-511-3p
GAUGUGU	mmu-miR-466b-5p/mmu-miR-466c-5p	2.629729982384	0.00427263552452858	0.568260524762301	55	Muscle	29	0	mmu-miR-466b-5p/mmu-miR-466c-5p
AUGUAGU	mmu-miR-380-3p	4.24164142693798	1.10945498888061e-05	0.00380543061186048	73	Muscle	221	0	mmu-miR-380-3p
GUACCAU	mmu-miR-3101	4.21827450863502	1.23089498425984e-05	0.00419735189632607	118	Muscle	2	0	mmu-miR-3101
CAAGUGC	mmu-miR-105	6.89602100965784	2.67396448198681e-12	1.46265857164679e-09	181	Muscle	14	0	mmu-miR-105
GAAACAU	mmu-miR-494	7.71292769088442	6.14818820658283e-15	3.49217090133905e-12	253	Muscle	77	1	mmu-miR-494
GACCCUG	mmu-miR-504	4.43251179709998	4.65708022641282e-06	0.00174174800467839	92	Muscle	202	0	mmu-miR-504
GUUGUGU	mmu-miR-669a-5p/mmu-miR-669f-5p/mmu-miR-669l	1.75062947941511	0.0400048769737635	1	59	Muscle	114	0	mmu-miR-669a-5p/mmu-miR-669f-5p/mmu-miR-669l
UGUGUCA	mmu-miR-599	3.75926889138057	8.52053054266952e-05	0.0230054324652077	86	Muscle	1	0	mmu-miR-599
AUACCUC	mmu-miR-875-5p	2.89842864083779	0.00187518820711464	0.31430015928588	57	Muscle	2	1	mmu-miR-875-5p
AAAGCCU	mmu-miR-3078	5.66452974833084	7.37141424368609e-09	3.56039307970038e-06	176	Muscle	7	0	mmu-miR-3078
GUCACUC	mmu-miR-668	3.02791090193619	0.00123125339828592	0.22901313208118	83	Muscle	227	1	mmu-miR-668
UCUAGCC	mmu-miR-344f-3p	3.42323818692684	0.000309399147590348	0.0711618039457801	49	Muscle	2	0	mmu-miR-344f-3p
UUGAACC	mmu-miR-434-3p	2.04957520670697	0.0202029509545467	1	89	Muscle	42775	0	mmu-miR-434-3p
GAAGCGC	mmu-miR-3080-5p	1.80746695489797	0.0353447512841907	1	12	Muscle	4	0	mmu-miR-3080-5p
UAUAAUA	mmu-miR-374	8.63195653211926	3.01556529425958e-18	1.77013682773037e-15	379	Muscle	1597	1	mmu-miR-374
AGGCUAG	mmu-miR-3099	1.50665645935791	0.0659493687301341	1	47	Muscle	29	0	mmu-miR-3099
AUCCUUU	mmu-miR-501-5p	4.25313644220728	1.05398523744497e-05	0.00364678892155959	119	Muscle	68	0	mmu-miR-501-5p
GAUAGAC	mmu-miR-463	1.62657456945501	0.0519137420100223	1	26	Muscle	0	0	mmu-miR-463
GUCAGUC	mmu-miR-344f-5p	5.10760032486986	1.63137935560452e-07	7.22701054532802e-05	123	Muscle	1	0	mmu-miR-344f-5p
GUCAGUU	mmu-miR-223	6.24710828734952	2.09060597147819e-10	1.08084328725423e-07	162	Muscle	2566	2	mmu-miR-223
UUGUUCG	mmu-miR-375	3.52125893355964	0.000214751496311994	0.0513466125240809	119	Muscle	64	2	mmu-miR-375
CAGUAAC	mmu-miR-802	5.22395507782245	8.7570643032013e-08	3.96695012935019e-05	149	Muscle	19	2	mmu-miR-802
UGGGAAC	mmu-miR-3100-5p	3.63716412782485	0.000137828146429566	0.035559661778828	78	Muscle	13	0	mmu-miR-3100-5p
CCAGGAG	mmu-miR-665	4.79384433105432	8.18076260961923e-07	0.000342773953343046	143	Muscle	158	1	mmu-miR-665
UUGAUCU	mmu-miR-3079-5p	2.65699428899018	0.00394203893085555	0.544997687044333	97	Muscle	8	0	mmu-miR-3079-5p
UCCUAUG	mmu-miR-202-5p	3.40108762415321	0.000335591549520666	0.0765148732907117	114	Muscle	47	2	mmu-miR-202-5p
AAUGUUG	mmu-miR-409-3p	5.1672228534549	1.1879895223021e-07	5.31031316469039e-05	130	Muscle	961	1	mmu-miR-409-3p
AUCUAGU	mmu-miR-878-5p	3.1294374407522	0.000875706809186156	0.172514241409673	56	Muscle	0	0	mmu-miR-878-5p
AGCUUAU	mmu-miR-21/mmu-miR-590-5p	5.47497236387086	2.18789948078803e-08	1.02612485648959e-05	169	Muscle	265071	2	mmu-miR-21/mmu-miR-590-5p
ACUCCAG	mmu-miR-509-5p	1.89004571682965	0.0293759230382228	1	91	Muscle	0	0	mmu-miR-509-5p
CCCUCAG	mmu-miR-760-5p	4.35540497562848	6.64105635477329e-06	0.00237749817500884	73	Muscle	8	0	mmu-miR-760-5p
UGGUUGC	mmu-miR-3066	2.6849204114268	0.00362735397232335	0.515084264069916	70	Muscle	32	0	mmu-miR-3066
GAGAUGA	mmu-miR-143	5.20062314149683	9.93107354946732e-08	4.47891417080976e-05	183	Muscle	3500434	2	mmu-miR-143
AUGUGUG	mmu-miR-1187/mmu-miR-466a-5p	4.24244317924026	1.10549765566699e-05	0.00380291193549443	98	Muscle	4	0	mmu-miR-1187/mmu-miR-466a-5p
GGUAGAC	mmu-miR-379/mmu-miR-1193-5p	4.20280053810438	1.31816439391023e-05	0.00441585071959926	49	Muscle	5668	1	mmu-miR-379/mmu-miR-1193-5p
AGCUUUC	mmu-miR-3095-5p	5.47005042740073	2.24953775349237e-08	1.05053413088094e-05	157	Muscle	1	0	mmu-miR-3095-5p
CCCAGGU	mmu-miR-3090	3.12337136246086	0.00089396000674512	0.174322201315298	84	Muscle	1	0	mmu-miR-3090
ACCCGUA	mmu-miR-99a/mmu-miR-100/mmu-miR-99b	2.14171503881154	0.0161082099001519	1	29	Muscle	385594	2	mmu-miR-99a/mmu-miR-100/mmu-miR-99b
AACACUG	mmu-miR-141/mmu-miR-200a	8.07514983348564	3.36969196932089e-16	1.93420319039019e-13	433	Muscle	1384	2	mmu-miR-141/mmu-miR-200a
GCAGAGG	mmu-miR-298	3.5602441603427	0.000185255067610481	0.0463137669026202	186	Muscle	614	0	mmu-miR-298
GGAUUUC	mmu-miR-876-5p	4.78004859564193	8.76264141727787e-07	0.000364525882958759	94	Muscle	0	1	mmu-miR-876-5p
AGGGAUU	mmu-miR-541	2.55615871718857	0.00529174163089769	0.645592478969519	58	Muscle	52302	0	mmu-miR-541
AGUGGGC	mmu-miR-3061-5p	0.635480709774301	0.262557471945225	1	35	Muscle	719	0	mmu-miR-3061-5p
UGACUCC	mmu-miR-3077	2.66986062663888	0.0037941368731211	0.534973299110075	47	Muscle	9	0	mmu-miR-3077
AAUGGGG	mmu-miR-3092	1.30309954579452	0.096270389339103	1	49	Muscle	4	0	mmu-miR-3092
AGGCUCA	mmu-miR-3079-3p	5.25103138768941	7.56249505692169e-08	3.43337275584245e-05	142	Muscle	3	0	mmu-miR-3079-3p
AACGGAA	mmu-miR-191	2.83575316361533	0.00228588825132124	0.367892331867857	35	Muscle	613650	2	mmu-miR-191
GUGACUG	mmu-miR-134	4.27618875886981	9.50600207063882e-06	0.00331759472265295	65	Muscle	370	1	mmu-miR-134
CAGGACC	mmu-miR-1933-3p	2.18074470543426	0.014601152220237	1	57	Muscle	250	0	mmu-miR-1933-3p
AGCUAGC	mmu-miR-1198-3p	4.49557705179007	3.46907637404526e-06	0.00133906348038147	45	Muscle	22	0	mmu-miR-1198-3p
AUCAGGG	mmu-miR-465a-3p	2.55261672979569	0.00534585381056012	0.645592478969519	33	Muscle	0	0	mmu-miR-465a-3p
UGUAUGU	mmu-miR-297b-5p/mmu-miR-297a/mmu-miR-297c	4.98064196282851	3.16868465389095e-07	0.000137520913978867	68	Muscle	6	0	mmu-miR-297b-5p/mmu-miR-297a/mmu-miR-297c
AACCUCU	mmu-miR-3103	4.05600544946151	2.49595475717375e-05	0.00770789086691654	62	Muscle	8	0	mmu-miR-3103
UAGACUG	mmu-miR-151-3p	2.97494939735565	0.001465184411693	0.262268009693047	52	Muscle	188880	1	mmu-miR-151-3p
GAGGAAU	mmu-miR-3063	4.68908050934038	1.37217703691115e-06	0.000559848231059748	121	Muscle	0	0	mmu-miR-3063
GGGUACA	mmu-miR-1b-3p	3.45284577440575	0.000277353023662868	0.0646232545134483	63	Muscle	4	0	mmu-miR-1b-3p
GCGGGGC	mmu-miR-744	1.92730939734936	0.0269705415807036	1	11	Muscle	7203	1	mmu-miR-744
GUGGACA	mmu-miR-3093-3p	2.57557655333555	0.00500365589303584	0.62545698662948	66	Muscle	1	0	mmu-miR-3093-3p
UGCAUGG	mmu-miR-669h-5p	3.05434018282929	0.00112778077899074	0.210895005671268	102	Muscle	1	0	mmu-miR-669h-5p
AUCCUUG	mmu-miR-362-5p	3.52568187835071	0.000211197012273891	0.0511096769702817	71	Muscle	532	1	mmu-miR-362-5p
UGCGCUC	mmu-miR-3081	1.82077957580907	0.0343201850882171	1	5	Muscle	13	0	mmu-miR-3081
AUCCCUU	mmu-miR-188-5p	4.07984573999862	2.25327982904156e-05	0.00700770026831925	97	Muscle	136	1	mmu-miR-188-5p
UGUGACA	mmu-miR-3100-3p	2.66122542533833	0.00389284062174524	0.544997687044333	120	Muscle	2	0	mmu-miR-3100-3p
GGGCCCC	mmu-miR-296-5p	3.22241581601741	0.000635572566243175	0.132834666344823	65	Muscle	162	1	mmu-miR-296-5p
AGGGUUG	mmu-miR-296-3p	2.63808522592028	0.00416878125178667	0.558616687739413	20	Muscle	10	1	mmu-miR-296-3p
GAAGGUC	mmu-miR-493	3.30304243672567	0.000478209564537624	0.105015695161638	59	Muscle	67	1	mmu-miR-493
CCAAUGA	mmu-miR-3086-3p	3.55710899651593	0.000187479303548481	0.0466823465835717	73	Muscle	4	0	mmu-miR-3086-3p
GAGAGAU	mmu-miR-741	2.19289759570999	0.0141573789974255	1	61	Muscle	5	0	mmu-miR-741
CUCUAGC	mmu-miR-1251	4.21154767187898	1.2681350718338e-05	0.00428629654279826	66	Muscle	2	1	mmu-miR-1251
AUGGGUC	mmu-miR-3091-5p	2.32117467112295	0.0101387093092033	1	27	Muscle	23	0	mmu-miR-3091-5p
AACCGUU	mmu-miR-451	1.30656736741193	0.0956798427419033	1	9	Muscle	20952	2	mmu-miR-451
CGUACCG	mmu-miR-126-3p	3.11447114268926	0.000921374905940165	0.177825356846452	18	Muscle	90364	2	mmu-miR-126-3p
GCGGGCA	mmu-miR-666-5p	0.683870911985794	0.247028341709914	1	11	Muscle	453	0	mmu-miR-666-5p
GGUGCGG	mmu-miR-675-5p	2.34692980097445	0.00946441034897378	1	5	Muscle	40	0	mmu-miR-675-5p
AUGCCUU	mmu-miR-532-5p	2.8830446937873	0.00196925777683823	0.324927533178309	97	Muscle	8808	1	mmu-miR-532-5p
GAUCGAC	mmu-miR-369-5p	1.00715197718473	0.156930873273006	1	3	Muscle	189	0	mmu-miR-369-5p
GGUCGAC	mmu-miR-412-5p	0.845952871164204	0.198789518016379	1	3	Muscle	357	1	mmu-miR-412-5p
UUUGCGA	mmu-miR-450a	-1.31123477609478	0.0948892283004664	1	7	Muscle	1440	1	mmu-miR-450a
CGCCCUU	mmu-miR-1249	2.2599663853512	0.0119116685856737	1	6	Muscle	5010	1	mmu-miR-1249
AUCGUAC	mmu-miR-487b	1.98053513129397	0.0238217149079165	1	9	Muscle	346	1	mmu-miR-487b
CGCUCUG	mmu-miR-3104-3p	3.11948349551447	0.00090584205034821	0.175733357767553	10	Muscle	0	0	mmu-miR-3104-3p
CGACUUC	mmu-miR-1964-3p	1.29396501833508	0.0978387521325488	1	4	Muscle	229	0	mmu-miR-1964-3p
ACGUCAU	mmu-miR-598	1.63078825976622	0.0514675027723938	1	10	Muscle	134	0	mmu-miR-598
CGGAUCC	mmu-miR-127	2.60713392941891	0.00456518202052473	0.597901488061561	10	Muscle	203890	1	mmu-miR-127
CUCGACU	mmu-miR-434-5p	0.91412630658447	0.180325240506997	1	1	Muscle	12258	0	mmu-miR-434-5p
CGUCCUG	mmu-miR-676	-0.526641709979746	0.299221210653189	1	7	Muscle	4998	0	mmu-miR-676
UCGUAGA	mmu-miR-376a	0.367809954267071	0.356507473061166	1	1	Muscle	155	0	mmu-miR-376a
CGUGUGU	mmu-miR-466f	2.03640801528158	0.0208547006263033	1	9	Muscle	0	0	mmu-miR-466f
GUGCCGC	mmu-miR-293	0.707266728569029	0.23970036880226	1	4	Muscle	0	0	mmu-miR-293
CAUCCGG	mmu-miR-5103	0.598332958930862	0.274808894495448	1	1	Muscle	52	0	mmu-miR-5103
ACGCUCA	mmu-miR-574-3p	-0.809788847157337	0.209030771819999	1	4	Muscle	1939	0	mmu-miR-574-3p
CCCGUCC	mmu-miR-1247	1.10224118278019	0.135178416149671	1	4	Muscle	754	0	mmu-miR-1247
CGAGGAG	mmu-miR-151-5p	1.0913690573973	0.137555261059771	1	5	Muscle	78247	1	mmu-miR-151-5p
CCGAGCC	mmu-miR-615-3p	1.7325608110583	0.0415868798806434	1	3	Muscle	3233	1	mmu-miR-615-3p
ACGUAGU	mmu-miR-471-5p	1.83798525979793	0.0330322886879252	1	2	Muscle	1	0	mmu-miR-471-5p
CCUCGGG	mmu-miR-3080-3p	1.20269649994588	0.11454689442408	1	4	Muscle	2	0	mmu-miR-3080-3p
CGUGUCU	mmu-miR-187	-0.705061460327817	0.240385994557723	1	6	Muscle	42	2	mmu-miR-187
GAGCGCC	mmu-miR-339-3p	0.797433942876595	0.21259952636817	1	7	Muscle	662	0	mmu-miR-339-3p
GCUCGGU	mmu-miR-423-3p	1.29740087522522	0.0972466457710185	1	5	Muscle	12508	1	mmu-miR-423-3p
CGACCCA	mmu-miR-551b	-0.369254743589371	0.355968927479987	1	4	Muscle	5	2	mmu-miR-551b
AUGGCGC	mmu-miR-652	1.56218488580522	0.0591222200629052	1	2	Muscle	3276	1	mmu-miR-652
CCGGUUC	mmu-miR-671-3p	-0.937681845403736	0.174203968156878	1	4	Muscle	2200	0	mmu-miR-671-3p
AGACGGG	mmu-miR-483	0.259902491998598	0.397469494489398	1	3	Muscle	172	0	mmu-miR-483
UAGCCGC	mmu-miR-701	1.19013486757641	0.116996693906543	1	2	Muscle	10	0	mmu-miR-701
ACGCGGG	mmu-miR-700	0.599225434966957	0.274511281834627	1	1	Muscle	123	0	mmu-miR-700
AAAGUGC	mmu-miR-106a/mmu-miR-17/mmu-miR-106b/mmu-miR-20a/mmu-miR-93/mmu-miR-20b	8.75504420163932	1.02011755344233e-18	6.29412530473919e-16	755	Heart	87389	2	mmu-miR-106a/mmu-miR-17/mmu-miR-106b/mmu-miR-20a/mmu-miR-93/mmu-miR-20b
AAGUGCU	mmu-miR-302a/mmu-miR-291a-3p/mmu-miR-294/mmu-miR-295/mmu-miR-302d/mmu-miR-302b	6.29622813169948	1.52487719356825e-10	8.82903895076018e-08	460	Heart	30	2	mmu-miR-302a/mmu-miR-291a-3p/mmu-miR-294/mmu-miR-295/mmu-miR-302d/mmu-miR-302b
AAGUUGU	mmu-miR-382	2.96730558257864	0.0015021110544338	0.432607983676936	90	Heart	33	1	mmu-miR-382
ACACACC	mmu-miR-329/mmu-miR-362-3p	3.71057370479425	0.000103395038760813	0.0404274601554779	154	Heart	462	1	mmu-miR-329/mmu-miR-362-3p
ACAUACA	mmu-miR-466m-3p/mmu-miR-466o-3p	6.12147846575733	4.63555250332147e-10	2.64690047939656e-07	377	Heart	2	0	mmu-miR-466m-3p/mmu-miR-466o-3p
ACAUUCA	mmu-miR-181a/mmu-miR-181c/mmu-miR-181d/mmu-miR-181b	7.85790762615581	1.9530158977287e-15	1.18157461812587e-12	644	Heart	724090	2	mmu-miR-181a/mmu-miR-181c/mmu-miR-181d/mmu-miR-181b
AGUUGUG	mmu-miR-669o-5p	1.49925651369965	0.0669035495332404	1	76	Heart	44	0	mmu-miR-669o-5p
AUACAUA	mmu-miR-297b-3p/mmu-miR-467g/mmu-miR-466a-3p/mmu-miR-466d-3p	6.37568901105702	9.10710986820845e-11	5.30944505316553e-08	539	Heart	40	0	mmu-miR-297b-3p/mmu-miR-467g/mmu-miR-466a-3p/mmu-miR-466d-3p
AUAUACA	mmu-miR-669f-3p	8.82916641307551	5.27293591589897e-19	3.26922026785736e-16	917	Heart	57	0	mmu-miR-669f-3p
CCCCUGG	mmu-miR-331-3p	2.51649807050879	0.00592637745914081	1	90	Heart	1053	1	mmu-miR-331-3p
CUGGCUG	mmu-miR-3085-3p/mmu-miR-3064-5p	3.85036766825284	5.89703205491519e-05	0.024059890784054	214	Heart	8	1	mmu-miR-3085-3p/mmu-miR-3064-5p
CUGGUCC	mmu-miR-1934	4.11988745472936	1.89528753225771e-05	0.00833926514193393	139	Heart	22	0	mmu-miR-1934
CUUUGGU	mmu-miR-9	8.76504395732943	9.33518991925431e-19	5.76914737009916e-16	777	Heart	1392	2	mmu-miR-9
GAUUGUC	mmu-miR-219-5p	5.54387027029149	1.4792903481829e-08	8.04733949411498e-06	246	Heart	444	2	mmu-miR-219-5p
GCACCAC	mmu-miR-770-5p	3.50977824272312	0.000224240277957144	0.0805022597866146	153	Heart	5	0	mmu-miR-770-5p
GCAGCUG	mmu-miR-1968	3.60422194062608	0.000156544717672883	0.0585477244096582	254	Heart	60	0	mmu-miR-1968
GCCCCCU	mmu-miR-3072	1.26526160449498	0.102888782708584	1	51	Heart	5	0	mmu-miR-3072
GCUGGAG	mmu-miR-1964-5p	3.54058230415394	0.000199622545013126	0.0722633612947518	129	Heart	37	0	mmu-miR-1964-5p
GGCAGUG	mmu-miR-34a/mmu-miR-449a/mmu-miR-449c/mmu-miR-34b-5p/mmu-miR-34c/mmu-miR-449b	5.31006935944955	5.4791761510157e-08	2.90396336003832e-05	337	Heart	14811	2	mmu-miR-34a/mmu-miR-449a/mmu-miR-449c/mmu-miR-34b-5p/mmu-miR-34c/mmu-miR-449b
GUGGGGA	mmu-miR-491	3.10116265813275	0.000963811856913133	0.294926428215419	64	Heart	54	1	mmu-miR-491
UACAUAC	mmu-miR-466b-3p	6.16766368534197	3.46531773129316e-10	1.98562706003098e-07	356	Heart	65	0	mmu-miR-466b-3p
UCUGCCU	mmu-miR-3110	3.30812481154931	0.000469614703086421	0.154972852018519	131	Heart	9	0	mmu-miR-3110
UGUGCUU	mmu-miR-218	8.74902793619741	1.07599194610163e-18	6.62811038798606e-16	508	Heart	2777	2	mmu-miR-218
UUAUUGA	mmu-miR-325	4.80724744189213	7.65112736572543e-07	0.000388677270178852	1174	Heart	2	1	mmu-miR-325
UUGGCAA	mmu-miR-182	7.51668468446578	2.80913484982664e-14	1.69390831444546e-11	650	Heart	2393	2	mmu-miR-182
UUGGCAC	mmu-miR-96	8.24736875779206	8.09600857335045e-17	4.96285325546382e-14	627	Heart	35	2	mmu-miR-96
AACAUCC	mmu-miR-448-5p	4.27710871849113	9.46681742733205e-06	0.00435473601657274	101	Heart	2	0	mmu-miR-448-5p
AACAUUC	mmu-miR-543	5.86811894775745	2.2038350477809e-09	1.24296296694843e-06	342	Heart	50	1	mmu-miR-543
AGGUCAC	mmu-miR-1193-3p	5.70423004859849	5.8435074866184e-09	3.24314665507321e-06	133	Heart	15	1	mmu-miR-1193-3p
AGUGGUU	mmu-miR-876-3p/mmu-miR-140	4.30181759946382	8.47013695580895e-06	0.00393861368445116	169	Heart	13507	2	mmu-miR-876-3p/mmu-miR-140
CCAGUGU	mmu-miR-199a-5p	5.26478120764465	7.01782047982515e-08	3.7124270338275e-05	271	Heart	24981	2	mmu-miR-199a-5p
CCCUGAG	mmu-miR-125a-5p/mmu-miR-351/mmu-miR-125b-5p	6.24534118648241	2.11438005087987e-10	1.21999728935768e-07	487	Heart	309154	2	mmu-miR-125a-5p/mmu-miR-351/mmu-miR-125b-5p
CCCUGUC	mmu-miR-339-5p	4.55079105675969	2.6722300429523e-06	0.00130672049100367	99	Heart	1134	1	mmu-miR-339-5p
GAGAACU	mmu-miR-146a/mmu-miR-146b	1.53557870194008	0.0623208705201397	1	110	Heart	253823	2	mmu-miR-146a/mmu-miR-146b
GAGGUAG	mmu-miR-1961/mmu-let-7g/mmu-miR-98/mmu-let-7a/mmu-let-7b/mmu-let-7i/mmu-let-7d/mmu-let-7f/mmu-let-7e/mmu-let-7c	8.48207498183428	1.10606463025649e-17	6.79123682977487e-15	665	Heart	1232990	2	mmu-miR-1961/mmu-let-7g/mmu-miR-98/mmu-let-7a/mmu-let-7b/mmu-let-7i/mmu-let-7d/mmu-let-7f/mmu-let-7e/mmu-let-7c
GAGGUAU	mmu-miR-202-3p	8.1898027072429	1.30827369059894e-16	8.00663498646552e-14	467	Heart	8788	0	mmu-miR-202-3p
UCCCUGA	mmu-miR-670	6.15785540448832	3.68683156264964e-10	2.10886765383559e-07	389	Heart	4	0	mmu-miR-670
AUUUAGA	mmu-miR-465a-5p/mmu-miR-465b-5p/mmu-miR-465c-5p	4.56970167501155	2.4420948141796e-06	0.00120395274339054	238	Heart	63	0	mmu-miR-465a-5p/mmu-miR-465b-5p/mmu-miR-465c-5p
AUUCAUU	mmu-miR-664	4.53346406423841	2.90120708333921e-06	0.00140998664250286	260	Heart	3110	0	mmu-miR-664
GGUGUGA	mmu-miR-1188	2.01426216534928	0.0219910079963828	1	67	Heart	9	0	mmu-miR-1188
AUAAAUA	mmu-miR-466l-3p	11.4097914281504	1.86812058554251e-30	1.16944348654961e-27	1946	Heart	1	0	mmu-miR-466l-3p
GGUCAGA	mmu-miR-540-3p	5.11456858133068	1.57229413332278e-07	8.2073753759449e-05	135	Heart	61	0	mmu-miR-540-3p
UAAUACA	mmu-miR-374c	4.65970539644672	1.58331137326755e-06	0.00078848906388724	465	Heart	1	1	mmu-miR-374c
AACAAAC	mmu-miR-1192/mmu-miR-495	7.273190128951	1.75547804882855e-13	1.05504230734596e-10	465	Heart	54	1	mmu-miR-1192/mmu-miR-495
AAGGCAC	mmu-miR-124	8.70658122841286	1.5658877412303e-18	9.63020960856632e-16	1086	Heart	27	2	mmu-miR-124
AAUACUG	mmu-miR-200b/mmu-miR-429/mmu-miR-200c	6.83749790789057	4.02941325931725e-12	2.39347147603444e-09	636	Heart	949	2	mmu-miR-200b/mmu-miR-429/mmu-miR-200c
ACAAUAU	mmu-miR-338-5p	6.53369167441132	3.20839895264386e-11	1.88653858415459e-08	484	Heart	189	0	mmu-miR-338-5p
ACAGUAC	mmu-miR-101a/mmu-miR-101b	8.09740750339999	2.80713806181724e-16	1.71516135577034e-13	453	Heart	115494	2	mmu-miR-101a/mmu-miR-101b
ACAGUAU	mmu-miR-144	8.00212629331641	6.11444307073061e-16	3.71758138700421e-13	475	Heart	53028	2	mmu-miR-144
ACCCUGU	mmu-miR-10a/mmu-miR-10b	4.43915260720675	4.51568816059999e-06	0.00216301462892739	148	Heart	3557305	2	mmu-miR-10a/mmu-miR-10b
ACUGUGU	mmu-miR-881	3.40953361410919	0.000325370290172318	0.112578120399622	107	Heart	35	0	mmu-miR-881
AGGAAAG	mmu-miR-1958	5.25849407666445	7.26199315599494e-08	3.83433238636533e-05	254	Heart	15	0	mmu-miR-1958
AUAUAAC	mmu-miR-344d/mmu-miR-410/mmu-miR-344e	5.79839987123491	3.34753290017141e-09	1.87461842409599e-06	370	Heart	827	1	mmu-miR-344d/mmu-miR-410/mmu-miR-344e
AUUCAGA	mmu-miR-871-5p	3.6850187204493	0.00011434291553168	0.0440220224796969	222	Heart	18	0	mmu-miR-871-5p
AUUGCAC	mmu-miR-25/mmu-miR-92a/mmu-miR-363-3p/mmu-miR-367/mmu-miR-32/mmu-miR-92b	7.95779990839056	8.75626267860305e-16	5.31505144591205e-13	536	Heart	208118	2	mmu-miR-25/mmu-miR-92a/mmu-miR-363-3p/mmu-miR-367/mmu-miR-32/mmu-miR-92b
CACAGUG	mmu-miR-128	10.5702921124764	2.0460900034776e-26	1.27676016217002e-23	624	Heart	5485	2	mmu-miR-128
CAGUGCA	mmu-miR-148a/mmu-miR-148b/mmu-miR-152	6.35213926732226	1.06170471600071e-10	6.1685043999641e-08	386	Heart	653959	2	mmu-miR-148a/mmu-miR-148b/mmu-miR-152
CAGUGCU	mmu-miR-1960	5.53813161141883	1.52857746829188e-08	8.3001756528249e-06	296	Heart	71	0	mmu-miR-1960
CAUGGAU	mmu-miR-490-5p	2.25045257739153	0.0122101153179716	1	63	Heart	257	0	mmu-miR-490-5p
CUACAGU	mmu-miR-139-5p	3.41759800877543	0.000315881714743327	0.109926836730678	195	Heart	5626	2	mmu-miR-139-5p
GCUACAU	mmu-miR-222/mmu-miR-1928/mmu-miR-221	5.53552607558056	1.55147781678766e-08	8.40900976698912e-06	219	Heart	19256	2	mmu-miR-222/mmu-miR-1928/mmu-miR-221
GGUUACC	mmu-miR-409-5p	3.12690835419586	0.000883274927322284	0.273850238377341	69	Heart	42	1	mmu-miR-409-5p
GUAAACA	mmu-miR-30b/mmu-miR-30a/mmu-miR-30e/mmu-miR-384-5p/mmu-miR-30c/mmu-miR-30d	13.7953214161734	1.35969065157771e-43	8.53885729190804e-41	871	Heart	8703711	2	mmu-miR-30b/mmu-miR-30a/mmu-miR-30e/mmu-miR-384-5p/mmu-miR-30c/mmu-miR-30d
GUGUGUG	mmu-miR-466k/mmu-miR-466i-5p/mmu-miR-466d-5p	5.0335082206605	2.40792077301177e-07	0.000125211880196612	240	Heart	9	0	mmu-miR-466k/mmu-miR-466i-5p/mmu-miR-466d-5p
UAGAGGA	mmu-miR-877	3.26297825224589	0.000551239898972374	0.179704207064994	63	Heart	54	1	mmu-miR-877
UCAAGUA	mmu-miR-26b/mmu-miR-26a	10.2286763000599	7.37609679513802e-25	4.59530830337099e-22	569	Heart	3139701	2	mmu-miR-26b/mmu-miR-26a
UCACAGC	mmu-miR-673-5p	8.76559392114336	9.28972830440131e-19	5.75034182042441e-16	527	Heart	348	0	mmu-miR-673-5p
UCACAGU	mmu-miR-27a/mmu-miR-27b	10.2285084767537	7.38888846525987e-25	4.59588862539164e-22	708	Heart	1024113	2	mmu-miR-27a/mmu-miR-27b
UGCAGUC	mmu-miR-682	4.05748536540465	2.48019622438472e-05	0.0107888535760735	118	Heart	0	2	mmu-miR-682
GCCACAC	mmu-miR-3064-3p	2.688372003436	0.00359006783936436	0.915467299037913	101	Heart	6	0	mmu-miR-3064-3p
CUUGUGU	mmu-miR-669d	3.13762529728495	0.00085161229696069	0.266554648948696	71	Heart	37	0	mmu-miR-669d
UAUUGCU	mmu-miR-137	6.68806755609747	1.13068374395896e-11	6.69364776423703e-09	661	Heart	33	2	mmu-miR-137
AAUGCCC	mmu-miR-365	4.75813348876837	9.76956371370762e-07	0.000491409054799493	154	Heart	2252	2	mmu-miR-365
ACAUAGA	mmu-miR-376c	3.48681296959953	0.000244406536162439	0.0870087268738284	132	Heart	99	1	mmu-miR-376c
AGGGAGG	mmu-miR-1943	3.70390023417413	0.000106154891924014	0.0412942529584415	121	Heart	1467	0	mmu-miR-1943
AUAAAGU	mmu-miR-142-5p	5.31050727197158	5.46602610418157e-08	2.90245986132041e-05	435	Heart	51970	2	mmu-miR-142-5p
CAGUAGU	mmu-miR-199a-3p	5.88654384913672	1.9717758239191e-09	1.11602511633821e-06	249	Heart	273125	2	mmu-miR-199a-3p
GUAGUGU	mmu-miR-142-3p	4.38778121817859	5.7256439676215e-06	0.00271395524065259	206	Heart	9622	2	mmu-miR-142-3p
AGCACCC	mmu-miR-3102	6.97251883715484	1.55657979518058e-12	9.27721557927623e-10	350	Heart	1717	0	mmu-miR-3102
AUACAAG	mmu-miR-539-3p/mmu-miR-381	6.37165072757171	9.35021897305565e-11	5.44182744231839e-08	503	Heart	2080	1	mmu-miR-539-3p/mmu-miR-381
CCUGUAC	mmu-miR-3107	1.67736847489921	0.046735225020502	1	72	Heart	8002374	1	mmu-miR-3107
GCUGAGA	mmu-miR-883a-5p	4.13859623353443	1.74718648899637e-05	0.00774003614625393	140	Heart	0	0	mmu-miR-883a-5p
AAAGCUG	mmu-miR-320	6.33714530003771	1.17030621014135e-10	6.78777601881986e-08	375	Heart	6619	1	mmu-miR-320
ACAUGGC	mmu-miR-3082-3p	3.51496287908171	0.000219907730612117	0.0791667830203623	132	Heart	859	0	mmu-miR-3082-3p
AAAGACA	mmu-miR-743a/mmu-miR-743b-3p	5.37029229513356	3.93045626462833e-08	2.10279410157616e-05	345	Heart	31	0	mmu-miR-743a/mmu-miR-743b-3p
AAAUCUU	mmu-miR-1264-3p	4.75721901991957	9.81390890717824e-07	0.000492658227140347	308	Heart	0	0	mmu-miR-1264-3p
AGAUUGU	mmu-miR-3086-5p	2.61522553620711	0.00445842769778567	1	111	Heart	23	0	mmu-miR-3086-5p
AGCACCA	mmu-miR-29a/mmu-miR-29b/mmu-miR-29c	10.6938238563654	5.43955466171879e-27	3.39972166357424e-24	651	Heart	179912	2	mmu-miR-29a/mmu-miR-29b/mmu-miR-29c
AGGUAGU	mmu-miR-196b/mmu-miR-196a	5.59188259137638	1.12310347917843e-08	6.14337603110601e-06	158	Heart	129	2	mmu-miR-196b/mmu-miR-196a
CAACAAA	mmu-miR-3065	4.87303612690935	5.49480584919172e-07	0.000281334059478616	332	Heart	13	0	mmu-miR-3065
CAAGAGC	mmu-miR-335-5p	4.55657997679734	2.59966237760938e-06	0.0012764342274062	115	Heart	8651	1	mmu-miR-335-5p
CUGGCUC	mmu-miR-149	4.23790137178056	1.12809418022695e-05	0.00515539040363714	189	Heart	19050	1	mmu-miR-149
GCAUCUG	mmu-miR-3089-3p	2.87500382463956	0.00202011301957651	0.563611532461847	146	Heart	19	0	mmu-miR-3089-3p
GGAGAGA	mmu-miR-185/mmu-miR-882/mmu-miR-3473	2.82867701413859	0.00233704222317301	0.628975436129942	105	Heart	4030	1	mmu-miR-185/mmu-miR-882/mmu-miR-3473
GGCUCAG	mmu-miR-24	5.61803673844571	9.65697193882701e-09	5.2920206224772e-06	320	Heart	164515	2	mmu-miR-24
GGCUCAU	mmu-miR-3106	4.65151864175535	1.647497410032e-06	0.000818806212785903	195	Heart	4	0	mmu-miR-3106
GUGACAG	mmu-miR-542-3p	3.37009391971351	0.00037571283920304	0.12849379100744	113	Heart	2539	1	mmu-miR-542-3p
UCACAUU	mmu-miR-23a/mmu-miR-23b	8.03756304646055	4.58213747167694e-16	2.79510385772293e-13	601	Heart	168409	2	mmu-miR-23a/mmu-miR-23b
UGCAUUG	mmu-miR-33	3.01312652099397	0.00129285546169059	0.378806650275343	198	Heart	169	2	mmu-miR-33
UCCCUUU	mmu-miR-211/mmu-miR-204	6.25372700300168	2.00385662787565e-10	1.15822913091213e-07	319	Heart	20173	2	mmu-miR-211/mmu-miR-204
AAUCUCA	mmu-miR-216a	4.88351017583335	5.21068845250724e-07	0.000267308317613621	112	Heart	2	2	mmu-miR-216a
AUACAUG	mmu-miR-466n-3p	4.77357950937244	9.04900257066934e-07	0.000456069729561735	393	Heart	0	0	mmu-miR-466n-3p
CUGAGUC	mmu-miR-1199	1.81771803619751	0.0345536198088958	1	117	Heart	64	0	mmu-miR-1199
GAGAAAU	mmu-miR-539-5p	4.22467859127476	1.1964101636697e-05	0.00541973804142374	309	Heart	16	0	mmu-miR-539-5p
GCACCCC	mmu-miR-3093-5p	4.09740759195039	2.08901434331371e-05	0.00914988282371403	67	Heart	0	0	mmu-miR-3093-5p
UAUACAU	mmu-miR-669m-3p	5.42639302943505	2.875213077008e-08	1.54111420927629e-05	590	Heart	9	0	mmu-miR-669m-3p
CACUGAG	mmu-miR-674/mmu-miR-3473d	5.2561636398749	7.35457106877447e-08	3.87585895324415e-05	164	Heart	1181	0	mmu-miR-674/mmu-miR-3473d
CUGGACU	mmu-miR-378	3.36518347964527	0.000382463871959285	0.130420180338116	75	Heart	833117	1	mmu-miR-378
GUCAACA	mmu-miR-505-3p	3.0951930729323	0.000983424097958844	0.299494627373156	111	Heart	110	1	mmu-miR-505-3p
GUUCUCA	mmu-miR-3067	3.48587343621847	0.000245266513502979	0.0870696122935577	105	Heart	3	0	mmu-miR-3067
UCCAGUU	mmu-miR-145	5.55827248477978	1.36228903836422e-08	7.43809814946865e-06	388	Heart	74937	2	mmu-miR-145
UGAUGUC	mmu-miR-3073-3p	3.33269433940914	0.000430046890338153	0.143635661372943	60	Heart	92	0	mmu-miR-3073-3p
GGAAUGU	mmu-miR-1a/mmu-miR-206	11.52532324891	4.91712082689481e-31	3.08303475846305e-28	474	Heart	2425050	2	mmu-miR-1a/mmu-miR-206
GGUGCCA	mmu-miR-3085-5p	1.79389094269251	0.0364152886956287	1	76	Heart	1	0	mmu-miR-3085-5p
UGGUCAC	mmu-miR-3073-5p	4.96103228429961	3.50597676528672e-07	0.000180908401088795	195	Heart	5	0	mmu-miR-3073-5p
UUGGUCC	mmu-miR-133a/mmu-miR-133b	7.93498315981899	1.05261943909595e-15	6.37887380092143e-13	383	Heart	16177	2	mmu-miR-133a/mmu-miR-133b
UAAAGGC	mmu-miR-1971/mmu-miR-1981	4.13317999193871	1.78889159300773e-05	0.00790690084109418	210	Heart	173	0	mmu-miR-1971/mmu-miR-1981
AAAGAAU	mmu-miR-186	5.00677606523384	2.76746284570552e-07	0.000143354575407546	376	Heart	161932	1	mmu-miR-186
AGCAGCG	mmu-miR-503	5.64224401644236	8.39239904529262e-09	4.62421187395623e-06	209	Heart	92	1	mmu-miR-503
GAGGCUG	mmu-miR-1962/mmu-miR-485	3.15938407860775	0.000790514910388026	0.249802711682616	141	Heart	24	1	mmu-miR-1962/mmu-miR-485
ACAUUAC	mmu-miR-323-3p	5.36871616698115	3.96495520297353e-08	2.11728607838786e-05	292	Heart	18	1	mmu-miR-323-3p
AGGCUCU	mmu-miR-344g-3p	1.21298074103978	0.112568591921377	1	72	Heart	8	0	mmu-miR-344g-3p
AUUAUUA	mmu-miR-126-5p	3.94861862420844	3.93017313605472e-05	0.0165853306341509	297	Heart	289561	0	mmu-miR-126-5p
CAGCCAC	mmu-miR-3058	3.00232516928876	0.00133962910022378	0.391171697265342	143	Heart	27	0	mmu-miR-3058
CAGUCUC	mmu-miR-452-3p	2.9536537845525	0.00157018049011534	0.447501439682872	139	Heart	9	1	mmu-miR-452-3p
CCUUGGC	mmu-miR-212-5p	3.83625221781644	6.24630565444138e-05	0.025360000957032	141	Heart	373	2	mmu-miR-212-5p
GAAAGGU	mmu-miR-471-3p	3.10537307023884	0.000950195824771648	0.291710118204896	120	Heart	1	0	mmu-miR-471-3p
GAGCAAG	mmu-miR-3105-5p	4.43440848748927	4.6162712988061e-06	0.00220657768082932	123	Heart	0	0	mmu-miR-3105-5p
GCCCCUG	mmu-miR-3070b-5p	2.13425715382738	0.0164108682488569	1	75	Heart	1	0	mmu-miR-3070b-5p
GGCUGGG	mmu-miR-3083	3.14526677488327	0.000829677205334547	0.261348319680382	228	Heart	2	0	mmu-miR-3083
GGGCCUG	mmu-miR-3091-3p/mmu-miR-2861	-0.549494246934236	0.291333155812329	1	89	Heart	52	0	mmu-miR-3091-3p/mmu-miR-2861
UCUUGGA	mmu-miR-470	3.57213133987527	0.000177043870949584	0.0654166895255657	134	Heart	229	0	mmu-miR-470
UGAAAGG	mmu-miR-488	3.64794410524821	0.000132173563397218	0.0503581276543402	159	Heart	775	1	mmu-miR-488
UUUGCAG	mmu-miR-450b-5p	5.80641139688702	3.19130117734957e-09	1.79351126167046e-06	236	Heart	2009	0	mmu-miR-450b-5p
UUUUUGC	mmu-miR-129-5p	4.5320991474083	2.92002129446903e-06	0.00141621032781748	261	Heart	24	2	mmu-miR-129-5p
AGUGCAA	mmu-miR-130a/mmu-miR-721/mmu-miR-301a/mmu-miR-130b/mmu-miR-301b	7.02212899791026	1.09256320711224e-12	6.52260234646006e-10	482	Heart	60556	2	mmu-miR-130a/mmu-miR-721/mmu-miR-301a/mmu-miR-130b/mmu-miR-301b
GCUGGUG	mmu-miR-138	4.97994900935315	3.18005141736606e-07	0.000164408658277825	320	Heart	237	2	mmu-miR-138
GUGCAAA	mmu-miR-19a/mmu-miR-19b	9.48790520118161	1.17861760715808e-21	7.3192153404517e-19	667	Heart	20141	2	mmu-miR-19a/mmu-miR-19b
ACUGCAU	mmu-miR-217	3.80448885002571	7.104865608659e-05	0.0286326084028958	167	Heart	7	2	mmu-miR-217
GACACCU	mmu-miR-667	1.40914855065715	0.0793956236338495	1	59	Heart	80	0	mmu-miR-667
UCUGCCA	mmu-miR-3084	2.67751180701516	0.0037085619159658	0.934557602823382	155	Heart	172	0	mmu-miR-3084
UGCAUAG	mmu-miR-153	6.18668982754382	3.07203437033314e-10	1.76334772857122e-07	452	Heart	449	2	mmu-miR-153
UGCAUAU	mmu-miR-448-3p	5.73073688961771	4.99976353781680e-09	2.78986805410177e-06	410	Heart	3	1	mmu-miR-448-3p
AAUCUCU	mmu-miR-216b	3.781842807392	7.78358285049702e-05	0.0311343314019881	122	Heart	0	2	mmu-miR-216b
CUCAAAC	mmu-miR-290-5p/mmu-miR-292-5p	2.89051049444154	0.00192308344675117	0.540386448537079	151	Heart	6	1	mmu-miR-290-5p/mmu-miR-292-5p
CUCAUUU	mmu-miR-3071	2.6202792836211	0.00439288910549014	1	210	Heart	0	0	mmu-miR-3071
GCAUAUA	mmu-miR-669i/mmu-miR-669j	3.34340464790538	0.000413785644839966	0.139445762311069	241	Heart	1	0	mmu-miR-669i/mmu-miR-669j
AGCCCUU	mmu-miR-129-1-3p/mmu-miR-129-2-3p	5.02464584200662	2.52181200850949e-07	0.000130882043241643	235	Heart	39	2	mmu-miR-129-1-3p/mmu-miR-129-2-3p
AAGUGCC	mmu-miR-467a/mmu-miR-290-3p/mmu-miR-292-3p	3.87883456059562	5.24790514585399e-05	0.0217263273038355	216	Heart	99	0	mmu-miR-467a/mmu-miR-290-3p/mmu-miR-292-3p
AGCAUUG	mmu-miR-1955-3p	2.39917698492195	0.00821598517342641	1	105	Heart	52	0	mmu-miR-1955-3p
AUGGCUU	mmu-miR-135a/mmu-miR-135b	6.53309328411324	3.22124938429187e-11	1.89087338857933e-08	414	Heart	1261	2	mmu-miR-135a/mmu-miR-135b
CAUAGAA	mmu-miR-3112	3.31897463786203	0.000451743174277228	0.149526990685762	181	Heart	0	0	mmu-miR-3112
CAUGACA	mmu-miR-878-3p	2.96997098518484	0.00148913938706103	0.430361282860639	99	Heart	2	0	mmu-miR-878-3p
CUCUGGG	mmu-miR-330/mmu-miR-326	3.55666313726742	0.000187797637473906	0.0687339353154497	189	Heart	1409	1	mmu-miR-330/mmu-miR-326
UAAUGCU	mmu-miR-155	2.67945208183512	0.0036871378563033	0.932845877644736	204	Heart	6512	2	mmu-miR-155
UAUAAAG	mmu-miR-340-5p	8.01033902128604	5.71963302892556e-16	3.48325651461567e-13	774	Heart	15222	1	mmu-miR-340-5p
UCAUUCG	mmu-miR-1298	2.67359445789815	0.00375215696460836	0.93664340971502	76	Heart	1	1	mmu-miR-1298
UUCCUAG	mmu-miR-384-3p	4.02658380461855	2.82965373908242e-05	0.0122241041528361	133	Heart	22	1	mmu-miR-384-3p
AAGUCAC	mmu-miR-224	4.15795725931661	1.60553040900135e-05	0.00714461032005602	182	Heart	540	1	mmu-miR-224
AUCUUAG	mmu-miR-1941-3p	2.43750581358495	0.0073944882083667	1	58	Heart	4	0	mmu-miR-1941-3p
CUCACCC	mmu-miR-1982.1	3.6787848032847	0.00011717394857782	0.0447604483567272	61	Heart	37	0	mmu-miR-1982.1
GCAUCCC	mmu-miR-324-5p	1.9248662893635	0.0271230441163341	1	65	Heart	4382	1	mmu-miR-324-5p
UAAGUGU	mmu-miR-467e/mmu-miR-467h	3.7125468194044	0.000102592044455456	0.0402160814265386	122	Heart	84	0	mmu-miR-467e/mmu-miR-467h
UCAUGAG	mmu-miR-3088	3.85352747973807	5.82140946845747e-05	0.023809564725991	116	Heart	3	0	mmu-miR-3088
UCAUGAU	mmu-miR-433	4.68676617186916	1.3877788563714e-06	0.000695277207042071	167	Heart	175	1	mmu-miR-433
UUGGUAC	mmu-miR-547	4.55295194918941	2.64491793633077e-06	0.00129600978880208	265	Heart	258	0	mmu-miR-547
GGAAGCC	mmu-miR-671-5p	3.91867199663304	4.45190911877207e-05	0.018653499207655	150	Heart	622	0	mmu-miR-671-5p
UGCCCUG	mmu-miR-874	3.04339532068108	0.00116962405029104	0.348547966986729	115	Heart	3824	1	mmu-miR-874
AAGUGCA	mmu-miR-291b-3p	5.89820323121156	1.83740591532603e-09	1.04180915398986e-06	490	Heart	286	0	mmu-miR-291b-3p
AUCAAAG	mmu-miR-291a-5p/mmu-miR-291b-5p	6.19561368059167	2.90291850924074e-10	1.66917814281343e-07	385	Heart	1	0	mmu-miR-291a-5p/mmu-miR-291b-5p
AUGGCAC	mmu-miR-183	5.553528116187	1.39980304989165e-08	7.62892662190949e-06	250	Heart	759	2	mmu-miR-183
CUCACAC	mmu-miR-342-3p	4.36487051035342	6.35990420804305e-06	0.00300187478619632	131	Heart	11145	1	mmu-miR-342-3p
GAGGUUG	mmu-miR-672	3.38251910932355	0.000359121403622712	0.123537762846213	96	Heart	34	0	mmu-miR-672
UAAGACG	mmu-miR-208b/mmu-miR-208a-3p	3.95564374502423	3.81644180101754e-05	0.0162475630302179	101	Heart	81272	2	mmu-miR-208b/mmu-miR-208a-3p
UAAGACU	mmu-miR-499	4.36655385287757	6.31110890080136e-06	0.00298515451007904	166	Heart	60928	2	mmu-miR-499
UCACAAA	mmu-miR-350	6.52934419364972	3.30291442777731e-11	1.93550785467751e-08	499	Heart	803	0	mmu-miR-350
UCUAGGA	mmu-miR-1929	3.40272054163521	0.00033359242267711	0.115089385823603	78	Heart	17	0	mmu-miR-1929
UUGUGAC	mmu-miR-758	2.50983286236466	0.00603941584259238	1	112	Heart	16	1	mmu-miR-758
UCUCUAA	mmu-miR-3108	3.77592151643751	7.97085925553095e-05	0.0317240198370132	133	Heart	20	0	mmu-miR-3108
GUCUGCC	mmu-miR-346	1.47055626541759	0.0707055794009971	1	65	Heart	4	1	mmu-miR-346
GUCUUGC	mmu-miR-431	3.43053063449349	0.000301200973956328	0.105420340884715	70	Heart	113	1	mmu-miR-431
GUUUUGU	mmu-miR-669b	4.34093196575501	7.09398260348353e-06	0.00333417182363726	194	Heart	24	0	mmu-miR-669b
UAUCAGA	mmu-miR-361	2.28768083586167	0.0110780572651595	1	110	Heart	5613	1	mmu-miR-361
CAGGAAC	mmu-miR-873	3.97408569381267	3.53250624608807e-05	0.015083801670796	137	Heart	6	1	mmu-miR-873
GAGGCUU	mmu-miR-879	4.30998273480838	8.16336460987454e-06	0.00381229127281141	84	Heart	140	0	mmu-miR-879
AAGGUGC	mmu-miR-18a/mmu-miR-18b	4.63890754350019	1.75127844904167e-06	0.000866882832275627	137	Heart	857	2	mmu-miR-18a/mmu-miR-18b
AAGUGCG	mmu-miR-467c/mmu-miR-467d	3.25113096761641	0.000574734467483271	0.186788701932063	111	Heart	115	0	mmu-miR-467c/mmu-miR-467d
AGGGGGC	mmu-miR-3104-5p	2.06224935141993	0.0195920011750257	1	28	Heart	3	0	mmu-miR-3104-5p
CUCCCAA	mmu-miR-150/mmu-miR-5127	3.0689879689023	0.00107392620439742	0.322177861319226	132	Heart	34837	2	mmu-miR-150/mmu-miR-5127
CUCCCAC	mmu-miR-532-3p	2.39328604441941	0.00834910857497352	1	116	Heart	193	1	mmu-miR-532-3p
GCACUCU	mmu-miR-3076-3p	2.15589368784893	0.015545983737264	1	64	Heart	54	0	mmu-miR-3076-3p
GUCUGGG	mmu-miR-3075	1.23080683055955	0.109197560119763	1	84	Heart	7	0	mmu-miR-3075
UCUGCUG	mmu-miR-3098-3p	3.64694545645272	0.000132688113896774	0.0504214832807743	178	Heart	80	0	mmu-miR-3098-3p
ACAGGGG	mmu-miR-3076-5p	2.54887672370198	0.00540352471345299	1	65	Heart	2	0	mmu-miR-3076-5p
AGCAGCA	mmu-miR-497/mmu-miR-195/mmu-miR-15a/mmu-miR-16/mmu-miR-322/mmu-miR-1907/mmu-miR-15b	6.55241051070657	2.83078237006366e-11	1.6673308159675e-08	715	Heart	741937	2	mmu-miR-497/mmu-miR-195/mmu-miR-15a/mmu-miR-16/mmu-miR-322/mmu-miR-1907/mmu-miR-15b
AGGUAGA	mmu-miR-1839-5p	4.67636319185475	1.46003625409372e-06	0.000728558090792766	201	Heart	2547	0	mmu-miR-1839-5p
GCAGCAU	mmu-miR-103/mmu-miR-107	5.72975447160557	5.028805228779e-09	2.8010445124299e-06	331	Heart	48616	2	mmu-miR-103/mmu-miR-107
GCUGCAG	mmu-miR-666-3p	3.12767931953804	0.000880961519387094	0.273850238377341	192	Heart	19	0	mmu-miR-666-3p
AACUCAC	mmu-miR-3087	2.92489626110819	0.001722855347613	0.489290918722093	81	Heart	7	0	mmu-miR-3087
ACAGGUG	mmu-miR-3097-5p	2.51597439743355	0.00593519027246956	1	110	Heart	5	0	mmu-miR-3097-5p
AGCUGCC	mmu-miR-22	7.49936070318903	3.20649157412667e-14	1.93030792762425e-11	250	Heart	2686515	2	mmu-miR-22
AGGAGCU	mmu-miR-28/mmu-miR-708	3.60669656582497	0.000155059976379428	0.0581474911422856	88	Heart	5133	1	mmu-miR-28/mmu-miR-708
AGGUGGA	mmu-miR-363-5p	1.7592239219999	0.0392697413035633	1	53	Heart	12	0	mmu-miR-363-5p
AUGCAAG	mmu-miR-300	3.57066878974575	0.000178035456707282	0.0655170480682798	189	Heart	1354	0	mmu-miR-300
AUUUAGC	mmu-miR-344b	2.40183670470879	0.00815649433245349	1	160	Heart	3	0	mmu-miR-344b
CUGCUUA	mmu-miR-3105-3p	3.8658390438807	5.53539675780502e-05	0.0227504806745786	107	Heart	1	0	mmu-miR-3105-3p
GACUGGC	mmu-miR-871-3p	1.82755724642227	0.0338080136135969	1	64	Heart	620	0	mmu-miR-871-3p
GAGUGUG	mmu-miR-574-5p	2.8497210393596	0.00218787944862345	0.597291089474203	70	Heart	570	0	mmu-miR-574-5p
GAGUUCA	mmu-miR-3089-5p	2.51581946811281	0.00593779978074051	1	88	Heart	4	0	mmu-miR-3089-5p
GAUAUGU	mmu-miR-190/mmu-miR-190b	2.58975236625963	0.00480224973366813	1	79	Heart	3761	2	mmu-miR-190/mmu-miR-190b
GGACGGA	mmu-miR-184	3.55455084737298	0.000189312645876628	0.0690991157449694	13	Heart	352	2	mmu-miR-184
GGAGUGU	mmu-miR-122	3.4141940554822	0.000319854973226364	0.110989675709548	100	Heart	182	2	mmu-miR-122
UCACACA	mmu-miR-377	4.32582519902193	7.59809480774825e-06	0.00355590837002618	273	Heart	83	1	mmu-miR-377
UCAGACC	mmu-miR-3097-3p	2.37826708457591	0.00869711095802566	1	79	Heart	6	0	mmu-miR-3097-3p
UGAGGAC	mmu-miR-1224	0.840923885291118	0.200195288250375	1	62	Heart	10	1	mmu-miR-1224
UGGAGUU	mmu-miR-3068	3.7780129785391	7.90423211921542e-05	0.0315378861556695	76	Heart	894	0	mmu-miR-3068
UGGCCCU	mmu-miR-328	1.68240165333103	0.0462454905074368	1	91	Heart	10229	1	mmu-miR-328
CUUGUUA	mmu-miR-544-5p	4.02525018354603	2.8457386575319e-05	0.0122651336139625	103	Heart	3	1	mmu-miR-544-5p
GUCAGGC	mmu-miR-344g-5p	2.59879140430629	0.00467763015777315	1	65	Heart	16	0	mmu-miR-344g-5p
AAAGCCA	mmu-miR-742	5.45494063551834	2.44946045836402e-08	1.31780972659984e-05	348	Heart	3	0	mmu-miR-742
AACCUGG	mmu-miR-490-3p	3.3588980305444	0.000391269684172113	0.132640422934346	93	Heart	33330	2	mmu-miR-490-3p
ACAGAAC	mmu-miR-1912	5.9386564790205	1.4368364431562e-09	8.1612309971272e-07	405	Heart	0	0	mmu-miR-1912
UGACCUA	mmu-miR-192/mmu-miR-215	2.3517922955742	0.00934160210718837	1	68	Heart	104734	2	mmu-miR-192/mmu-miR-215
CAUAACA	mmu-miR-669a-3-3p/mmu-miR-669a-3p	4.30422977954453	8.37838390189317e-06	0.00390432689828222	108	Heart	125	0	mmu-miR-669a-3-3p/mmu-miR-669a-3p
CCCACAG	mmu-miR-3057-3p	3.76128362223363	8.45218092256074e-05	0.0334706364533405	187	Heart	21	0	mmu-miR-3057-3p
GGAAGAC	mmu-miR-7a/mmu-miR-7b	4.12137346003327	1.88310159949257e-05	0.00830447805376225	244	Heart	2046	2	mmu-miR-7a/mmu-miR-7b
GGCUCUG	mmu-miR-760-3p	3.0830165653701	0.0010245687399964	0.308395190738917	185	Heart	3	1	mmu-miR-760-3p
GUCCCAG	mmu-miR-1955-5p	2.26867612943099	0.0116440141255768	1	108	Heart	65	0	mmu-miR-1955-5p
AUAAUAC	mmu-miR-369-3p	7.21666197420123	2.66395968613501e-13	1.59571185199487e-10	361	Heart	171	1	mmu-miR-369-3p
AUGUGUU	mmu-miR-1198-5p	3.81721321203619	6.7483764639177e-05	0.0272634409142275	78	Heart	1205	0	mmu-miR-1198-5p
GGCAAGA	mmu-miR-31	2.87271282422535	0.00203481932118992	0.565679771290799	197	Heart	2037	2	mmu-miR-31
GGGAGAU	mmu-miR-1941-5p	1.31746946947575	0.0938406541444918	1	63	Heart	5	0	mmu-miR-1941-5p
GUGUGCA	mmu-miR-466j/mmu-miR-466h-5p/mmu-miR-466m-5p	5.46944733411493	2.2572051939262e-08	1.21663359952622e-05	141	Heart	30	0	mmu-miR-466j/mmu-miR-466h-5p/mmu-miR-466m-5p
UCAACAG	mmu-miR-421	3.95579786633002	3.81398193197604e-05	0.0162475630302179	198	Heart	4291	1	mmu-miR-421
UGUGUGC	mmu-miR-466n-5p	4.8036207110669	7.79109378576967e-07	0.000395008454938522	80	Heart	5	0	mmu-miR-466n-5p
AACAGUC	mmu-miR-132/mmu-miR-212-3p	4.77807891812404	8.84889618090111e-07	0.000446869257135506	212	Heart	1753	2	mmu-miR-132/mmu-miR-212-3p
ACUCAGU	mmu-miR-201	3.64093950751757	0.000135822480962844	0.0514767202849178	68	Heart	259	0	mmu-miR-201
AUGCACC	mmu-miR-500/mmu-miR-501-3p	3.70905486900245	0.000104017173284146	0.0405666975808168	121	Heart	1063	1	mmu-miR-500/mmu-miR-501-3p
CAGUCCA	mmu-miR-455	4.54066988981054	2.8037886131084e-06	0.00136544505458379	163	Heart	765	2	mmu-miR-455
GGUCCUC	mmu-miR-1264-5p	2.81545042561968	0.00243544556582103	0.650263966074214	99	Heart	0	0	mmu-miR-1264-5p
AGGACAC	mmu-miR-1197	2.52164063741899	0.00584044859567749	1	95	Heart	2	1	mmu-miR-1197
CAGCAGG	mmu-miR-214/mmu-miR-761	4.64975313206211	1.66166287636633e-06	0.000824184786677702	342	Heart	2817	0	mmu-miR-214/mmu-miR-761
CCAGCAU	mmu-miR-338-3p	4.11440110696744	1.94092966270819e-05	0.00852068121928896	146	Heart	4088	2	mmu-miR-338-3p
GAUCUAG	mmu-miR-344/mmu-miR-344c	2.64230136177172	0.00411723755717173	1	30	Heart	38	0	mmu-miR-344/mmu-miR-344c
GCAAGGU	mmu-miR-679-3p	2.3468161515384	0.00946729750999564	1	91	Heart	1	0	mmu-miR-679-3p
GGACGAG	mmu-miR-1947	-0.170621327999915	0.432260763259473	1	5	Heart	312	0	mmu-miR-1947
UUCCUGC	mmu-miR-3074-5p	4.39209683258823	5.61313380137428e-06	0.00266623855565278	197	Heart	52	0	mmu-miR-3074-5p
UCCUGGC	mmu-miR-3113	3.37567045125539	0.000368180316034727	0.126285848399911	133	Heart	9	0	mmu-miR-3113
UUGGAGC	mmu-miR-3057-5p	3.56599035034638	0.000181242354591031	0.0665159441349086	80	Heart	368	0	mmu-miR-3057-5p
AACUGCA	mmu-miR-883a-3p/mmu-miR-883b-3p	3.45250407662492	0.000277704541829423	0.0980297032657863	188	Heart	5	0	mmu-miR-883a-3p/mmu-miR-883b-3p
ACUCCAU	mmu-miR-880	3.21881134674313	0.000643615713365182	0.207027794241143	72	Heart	5	0	mmu-miR-880
ACAGAGU	mmu-miR-3082-5p	2.6201236599447	0.00439489436675397	1	152	Heart	3	0	mmu-miR-3082-5p
AGCUUUU	mmu-miR-208a-5p	3.57248945415243	0.00017680186358261	0.0654166895255657	236	Heart	3075	0	mmu-miR-208a-5p
AGGUUAC	mmu-miR-872	3.74673113355061	8.95769646363573e-05	0.0352933240667248	60	Heart	1202	0	mmu-miR-872
CCUUCAU	mmu-miR-205	5.73601449745027	4.84651840671530e-09	2.70920378935385e-06	240	Heart	12	2	mmu-miR-205
GGUGCUA	mmu-miR-3070a/mmu-miR-3070b-3p	2.21582068834923	0.0133518925010252	1	74	Heart	7	0	mmu-miR-3070a/mmu-miR-3070b-3p
CAUAGCA	mmu-miR-3060	3.53599636296821	0.000203120143182921	0.0733263716890345	118	Heart	55	0	mmu-miR-3060
GAAUUGU	mmu-miR-219-3p	3.7974751589696	7.30887101578812e-05	0.0293816614834682	67	Heart	2	1	mmu-miR-219-3p
GAGUAUU	mmu-miR-496	1.67114889684501	0.0473461356296731	1	61	Heart	35	1	mmu-miR-496
UAGUUGU	mmu-miR-669c	1.57473236877576	0.057659116515135	1	65	Heart	85	0	mmu-miR-669c
UUAGGCA	mmu-miR-1948	4.04756149218744	2.58769940541742e-05	0.0112047384254574	140	Heart	29	0	mmu-miR-1948
UACCUUU	mmu-miR-3061-3p	3.93679131291395	4.12891798672204e-05	0.0173827447240998	144	Heart	197	0	mmu-miR-3061-3p
UGUGUGU	mmu-miR-466l-5p	3.97656901758083	3.49583566475688e-05	0.0149621766451595	160	Heart	0	0	mmu-miR-466l-5p
AGGGCCA	mmu-miR-3109	1.731952858834	0.0416409780813657	1	59	Heart	17	0	mmu-miR-3109
CCUCCAU	mmu-miR-1930	1.72152221371174	0.0425780523947462	1	81	Heart	4	0	mmu-miR-1930
UCAUAGA	mmu-miR-376b	2.47073520441254	0.00674178088888485	1	106	Heart	64	1	mmu-miR-376b
AUCACUA	mmu-miR-34b-3p	2.22215211702719	0.0131365135838534	1	66	Heart	73	0	mmu-miR-34b-3p
CCUGCUG	mmu-miR-370	2.37922020858088	0.0086746541012719	1	157	Heart	51	1	mmu-miR-370
AUAUCAG	mmu-miR-3074-1-3p	1.82141618588728	0.034271808300497	1	95	Heart	30	0	mmu-miR-3074-1-3p
AUGACAC	mmu-miR-425/mmu-miR-489	3.54454963583775	0.000196642223326435	0.0713811270674958	99	Heart	11660	2	mmu-miR-425/mmu-miR-489
AUGUGGG	mmu-miR-299	2.61386519741997	0.0044762175329341	1	48	Heart	120	1	mmu-miR-299
GGACACU	mmu-miR-3095-3p	1.22613582700628	0.110073782789681	1	74	Heart	4	0	mmu-miR-3095-3p
GGAGCCA	mmu-miR-505-5p	1.77982247501894	0.0375525091182078	1	97	Heart	37	0	mmu-miR-505-5p
GUUGGGG	mmu-miR-3094	2.29896489017067	0.0107534665430801	1	37	Heart	3	0	mmu-miR-3094
AGGUUAU	mmu-miR-154	2.45445177323563	0.00705497947446719	1	73	Heart	159	1	mmu-miR-154
CCUAACA	mmu-miR-3098-5p	2.11297352574533	0.0173015169503892	1	69	Heart	92	0	mmu-miR-3098-5p
GGGAAAG	mmu-miR-1953	2.43204271651209	0.00750696825826835	1	158	Heart	12	0	mmu-miR-1953
GUAACAG	mmu-miR-194	3.68034464329255	0.000116459466240686	0.0446039755701827	199	Heart	5646	2	mmu-miR-194
AGUAGAC	mmu-miR-411	1.8727208903953	0.0305534685368018	1	40	Heart	4670	1	mmu-miR-411
UUCCUCU	mmu-miR-3059	4.19388554290549	1.37108191835194e-05	0.00615615781340023	182	Heart	8	0	mmu-miR-3059
ACUGGCC	mmu-miR-193/mmu-miR-193b	3.68337542028837	0.000115082897579326	0.044191832670461	117	Heart	3461	2	mmu-miR-193/mmu-miR-193b
AGUCAUG	mmu-miR-707	1.34048728185371	0.0900434881937496	1	86	Heart	6	0	mmu-miR-707
GAGGGGC	mmu-miR-423-5p	2.21300804165999	0.0134485456189297	1	72	Heart	5329	1	mmu-miR-423-5p
UUGGGAA	mmu-miR-450b-3p	2.28568058131975	0.0111364760538752	1	131	Heart	52	0	mmu-miR-450b-3p
AGUGCUU	mmu-miR-302c	5.68316797630848	6.61111429185313e-09	3.66255731768663e-06	298	Heart	11	2	mmu-miR-302c
UGUGCGG	mmu-miR-147	0.510672977879248	0.304790032680075	1	11	Heart	14	2	mmu-miR-147
UGUGCGU	mmu-miR-210	-0.102340926954885	0.459243035408617	1	13	Heart	3260	2	mmu-miR-210
CUCCAUU	mmu-miR-136	2.40057653548925	0.0081846336122587	1	116	Heart	716	1	mmu-miR-136
GUCUUGU	mmu-miR-669e	2.54908347713062	0.00540032219147442	1	73	Heart	11	0	mmu-miR-669e
GAGAAUG	mmu-miR-3062	5.43016756089644	2.81505823810724e-08	1.51168627386359e-05	125	Heart	3	0	mmu-miR-3062
AUGUGUA	mmu-miR-511-3p	4.52266330004353	3.05331699427407e-06	0.00147780542522865	101	Heart	248	0	mmu-miR-511-3p
GAUGUGU	mmu-miR-466b-5p/mmu-miR-466c-5p	0.882128779526582	0.188853585285801	1	55	Heart	24	0	mmu-miR-466b-5p/mmu-miR-466c-5p
AUGUAGU	mmu-miR-380-3p	2.8278011753727	0.00234344528008443	0.628975436129942	70	Heart	39	0	mmu-miR-380-3p
GUACCAU	mmu-miR-3101	4.5214227878172	3.07126826681936e-06	0.00148342257287375	121	Heart	0	0	mmu-miR-3101
CAAGUGC	mmu-miR-105	4.51041566581497	3.23503600788893e-06	0.00155928735580246	172	Heart	15	0	mmu-miR-105
GAAACAU	mmu-miR-494	6.20288298784467	2.77190298087054e-10	1.59661611698143e-07	243	Heart	35	1	mmu-miR-494
GACCCUG	mmu-miR-504	2.83912933221542	0.00226184089194726	0.615220722609654	92	Heart	204	0	mmu-miR-504
GUUGUGU	mmu-miR-669a-5p/mmu-miR-669f-5p/mmu-miR-669l	1.70806392554885	0.0438122408245147	1	59	Heart	135	0	mmu-miR-669a-5p/mmu-miR-669f-5p/mmu-miR-669l
UGUGUCA	mmu-miR-599	3.0630866244425	0.00109533317895487	0.327504620507507	85	Heart	0	0	mmu-miR-599
AUACCUC	mmu-miR-875-5p	1.14467528976856	0.126171845571243	1	57	Heart	9	1	mmu-miR-875-5p
AAAGCCU	mmu-miR-3078	3.63071669491415	0.000141317646511195	0.0532563584682293	172	Heart	0	0	mmu-miR-3078
GUCACUC	mmu-miR-668	2.2047179730397	0.0137369455618853	1	79	Heart	64	1	mmu-miR-668
UCUAGCC	mmu-miR-344f-3p	0.805913743616917	0.210146293058635	1	48	Heart	5	0	mmu-miR-344f-3p
UUGAACC	mmu-miR-434-3p	0.614625050775282	0.269401183427316	1	85	Heart	1725	0	mmu-miR-434-3p
GAAGCGC	mmu-miR-3080-5p	0.857941548945142	0.195462369996469	1	12	Heart	2	0	mmu-miR-3080-5p
UAUAAUA	mmu-miR-374	6.6498128495315	1.46732966217185e-11	8.67191830343563e-09	361	Heart	1977	1	mmu-miR-374
AGGCUAG	mmu-miR-3099	2.82970615514058	0.00232953865233312	0.628975436129942	46	Heart	8	0	mmu-miR-3099
AUCCUUU	mmu-miR-501-5p	2.03705009990605	0.0208225108465666	1	114	Heart	40	0	mmu-miR-501-5p
GAUAGAC	mmu-miR-463	1.49349573274404	0.0676537352185055	1	26	Heart	3	0	mmu-miR-463
GUCAGUC	mmu-miR-344f-5p	4.89196601327688	4.99168434291939e-07	0.000256572575226056	121	Heart	7	0	mmu-miR-344f-5p
GUCAGUU	mmu-miR-223	5.80199298850651	3.27656513962332e-09	1.83815304332868e-06	162	Heart	3255	2	mmu-miR-223
UUGUUCG	mmu-miR-375	2.78232443230476	0.00269855288672858	0.707020856322887	114	Heart	76	2	mmu-miR-375
CAGUAAC	mmu-miR-802	4.82881831148336	6.86728251228015e-07	0.000350231408126287	151	Heart	8	2	mmu-miR-802
UGGGAAC	mmu-miR-3100-5p	2.31273502469994	0.0103686060467786	1	89	Heart	19	0	mmu-miR-3100-5p
CCAGGAG	mmu-miR-665	4.83528995477479	6.64758479091166e-07	0.000339691582815586	144	Heart	45	1	mmu-miR-665
UUGAUCU	mmu-miR-3079-5p	1.35196132136877	0.0881938444719992	1	92	Heart	6	0	mmu-miR-3079-5p
UCCUAUG	mmu-miR-202-5p	2.37643933599755	0.00874031777030333	1	114	Heart	1	2	mmu-miR-202-5p
AAUGUUG	mmu-miR-409-3p	4.34964434529898	6.81792516585123e-06	0.00321124275311593	131	Heart	399	1	mmu-miR-409-3p
AUCUAGU	mmu-miR-878-5p	4.23638489696074	1.13573638412219e-05	0.00517195956502067	55	Heart	4	0	mmu-miR-878-5p
AGCUUAU	mmu-miR-21/mmu-miR-590-5p	4.29036846983403	8.91884542885854e-06	0.00412050658813265	168	Heart	209418	2	mmu-miR-21/mmu-miR-590-5p
ACUCCAG	mmu-miR-509-5p	3.44999149152536	0.000280302111135909	0.0986663431198401	90	Heart	0	0	mmu-miR-509-5p
CCCUCAG	mmu-miR-760-5p	3.90935822843088	4.62708233554323e-05	0.0192486625158599	71	Heart	6	0	mmu-miR-760-5p
UGGUUGC	mmu-miR-3066	1.98992573621892	0.0232995584200184	1	70	Heart	44	0	mmu-miR-3066
GAGAUGA	mmu-miR-143	3.49399448774572	0.000237925421677654	0.085143178323297	180	Heart	3030047	2	mmu-miR-143
AUGUGUG	mmu-miR-1187/mmu-miR-466a-5p	2.77947455185366	0.00272234597377656	0.710532299155682	94	Heart	12	0	mmu-miR-1187/mmu-miR-466a-5p
GGUAGAC	mmu-miR-379/mmu-miR-1193-5p	4.06986197960115	2.35204989289329e-05	0.0102549375330148	49	Heart	1045	1	mmu-miR-379/mmu-miR-1193-5p
AGCUUUC	mmu-miR-3095-5p	4.2812644218239	9.29171916448018e-06	0.00428348253482536	152	Heart	2	0	mmu-miR-3095-5p
CCCAGGU	mmu-miR-3090	1.69223643691284	0.0453004508839546	1	82	Heart	1	0	mmu-miR-3090
ACCCGUA	mmu-miR-99a/mmu-miR-100/mmu-miR-99b	3.18411582094286	0.000725984519439925	0.230863077181896	30	Heart	417417	2	mmu-miR-99a/mmu-miR-100/mmu-miR-99b
AACACUG	mmu-miR-141/mmu-miR-200a	5.86383538658715	2.26147947039597e-09	1.27321294183293e-06	427	Heart	6283	2	mmu-miR-141/mmu-miR-200a
GCAGAGG	mmu-miR-298	2.71376053127801	0.00332621177499732	0.85816263794931	182	Heart	225	0	mmu-miR-298
GGAUUUC	mmu-miR-876-5p	3.13046083667641	0.000872661346744033	0.272270340184138	95	Heart	2	1	mmu-miR-876-5p
AGGGAUU	mmu-miR-541	2.10795428331463	0.0175174720334848	1	56	Heart	8417	0	mmu-miR-541
AGUGGGC	mmu-miR-3061-5p	0.596042532422185	0.275573406747836	1	35	Heart	94	0	mmu-miR-3061-5p
UGACUCC	mmu-miR-3077	2.01039247144075	0.0221948333343722	1	47	Heart	7	0	mmu-miR-3077
AAUGGGG	mmu-miR-3092	1.16880138461029	0.121241831202586	1	50	Heart	2	0	mmu-miR-3092
AGGCUCA	mmu-miR-3079-3p	4.17908372056954	1.46342966572105e-05	0.00655616490243029	142	Heart	1	0	mmu-miR-3079-3p
AACGGAA	mmu-miR-191	2.33659704213177	0.00973007320584462	1	35	Heart	619442	2	mmu-miR-191
GUGACUG	mmu-miR-134	5.36220711754996	4.11055989734034e-08	2.18973570779321e-05	66	Heart	173	1	mmu-miR-134
CAGGACC	mmu-miR-1933-3p	2.78685875506821	0.00266108354304907	0.702526055364954	56	Heart	35	0	mmu-miR-1933-3p
AGCUAGC	mmu-miR-1198-3p	4.23668865805245	1.13420165899576e-05	0.00517195956502067	42	Heart	23	0	mmu-miR-1198-3p
AUCAGGG	mmu-miR-465a-3p	2.45194629100088	0.00710429340154362	1	32	Heart	18	0	mmu-miR-465a-3p
UGUAUGU	mmu-miR-297b-5p/mmu-miR-297a/mmu-miR-297c	3.60091365610106	0.000158550440728686	0.0591393143917999	70	Heart	31	0	mmu-miR-297b-5p/mmu-miR-297a/mmu-miR-297c
AACCUCU	mmu-miR-3103	2.55489623162853	0.00531097293207735	1	61	Heart	13	0	mmu-miR-3103
UAGACUG	mmu-miR-151-3p	1.58357170008327	0.0566456091178803	1	52	Heart	148801	1	mmu-miR-151-3p
GAGGAAU	mmu-miR-3063	3.12781752841268	0.000880547390280839	0.273850238377341	115	Heart	2	0	mmu-miR-3063
GGGUACA	mmu-miR-1b-3p	3.01445775690678	0.0012871952936398	0.378435416330102	70	Heart	16	0	mmu-miR-1b-3p
GCGGGGC	mmu-miR-744	1.00191574466765	0.158192143831633	1	11	Heart	2728	1	mmu-miR-744
GUGGACA	mmu-miR-3093-3p	0.26540356436581	0.395349295313096	1	65	Heart	1	0	mmu-miR-3093-3p
UGCAUGG	mmu-miR-669h-5p	2.32982087080139	0.00990781030231164	1	100	Heart	3	0	mmu-miR-669h-5p
AUCCUUG	mmu-miR-362-5p	1.91970640067256	0.0274474976548796	1	71	Heart	513	1	mmu-miR-362-5p
UGCGCUC	mmu-miR-3081	1.57682312838054	0.0574181141597913	1	5	Heart	8	0	mmu-miR-3081
AUCCCUU	mmu-miR-188-5p	3.14518985297938	0.000829895397648189	0.261348319680382	97	Heart	225	1	mmu-miR-188-5p
UGUGACA	mmu-miR-3100-3p	2.39475203085936	0.00831580442720347	1	118	Heart	2	0	mmu-miR-3100-3p
GGGCCCC	mmu-miR-296-5p	2.06377813401735	0.0195193785914315	1	63	Heart	132	1	mmu-miR-296-5p
AGGGUUG	mmu-miR-296-3p	2.12436476369358	0.0168198270269747	1	21	Heart	8	1	mmu-miR-296-3p
GAAGGUC	mmu-miR-493	2.42106785807608	0.00773749412044065	1	58	Heart	4	1	mmu-miR-493
CCAAUGA	mmu-miR-3086-3p	2.70701504793857	0.00339455899835445	0.872401662577095	77	Heart	1	0	mmu-miR-3086-3p
GAGAGAU	mmu-miR-741	1.37202336358162	0.0850280823693705	1	60	Heart	41	0	mmu-miR-741
CUCUAGC	mmu-miR-1251	4.23667252034321	1.13428314362845e-05	0.00517195956502067	64	Heart	7	1	mmu-miR-1251
AUGGGUC	mmu-miR-3091-5p	0.201635445978612	0.420100866224732	1	25	Heart	21	0	mmu-miR-3091-5p
AACCGUU	mmu-miR-451	0.434143187074354	0.33209223297046	1	9	Heart	393459	2	mmu-miR-451
CGUACCG	mmu-miR-126-3p	1.8822796474616	0.0298990281930901	1	17	Heart	191148	2	mmu-miR-126-3p
GCGGGCA	mmu-miR-666-5p	1.5619106923941	0.0591545146153483	1	10	Heart	75	0	mmu-miR-666-5p
GGUGCGG	mmu-miR-675-5p	1.04887777420398	0.147117188043242	1	4	Heart	5	0	mmu-miR-675-5p
AUGCCUU	mmu-miR-532-5p	2.27917029999927	0.0113284719317542	1	97	Heart	6793	1	mmu-miR-532-5p
GAUCGAC	mmu-miR-369-5p	0.873839253771838	0.191102900013975	1	3	Heart	27	0	mmu-miR-369-5p
GGUCGAC	mmu-miR-412-5p	0.57576869521255	0.28238576786337	1	2	Heart	8	1	mmu-miR-412-5p
UUUGCGA	mmu-miR-450a	0.038324168413957	0.484714610665262	1	7	Heart	2464	1	mmu-miR-450a
CGCCCUU	mmu-miR-1249	1.3293592892858	0.0918647311287046	1	4	Heart	1431	1	mmu-miR-1249
AUCGUAC	mmu-miR-487b	0.489011302635757	0.3124168474678	1	8	Heart	42	1	mmu-miR-487b
CGCUCUG	mmu-miR-3104-3p	1.66309002147905	0.0481472085095789	1	9	Heart	0	0	mmu-miR-3104-3p
CGACUUC	mmu-miR-1964-3p	1.13087582674951	0.129053679501796	1	4	Heart	206	0	mmu-miR-1964-3p
ACGUCAU	mmu-miR-598	0.589591858154176	0.277732155757693	1	8	Heart	84	0	mmu-miR-598
CGGAUCC	mmu-miR-127	1.62158445270461	0.0524461769023161	1	9	Heart	32565	1	mmu-miR-127
CUCGACU	mmu-miR-434-5p	1.26217505598094	0.103442901148594	1	1	Heart	1453	0	mmu-miR-434-5p
CGUCCUG	mmu-miR-676	1.87999198122545	0.0300545853932122	1	7	Heart	1743	0	mmu-miR-676
UCGUAGA	mmu-miR-376a	-0.539558578334858	0.294750744489552	1	1	Heart	46	0	mmu-miR-376a
CGUGUGU	mmu-miR-466f	2.30313829577227	0.0106355316121704	1	9	Heart	2	0	mmu-miR-466f
GUGCCGC	mmu-miR-293	-0.537028012779538	0.295624132171735	1	4	Heart	9	0	mmu-miR-293
CAUCCGG	mmu-miR-5103	0.720236868898301	0.235689583608797	1	1	Heart	31	0	mmu-miR-5103
ACGCUCA	mmu-miR-574-3p	-0.0659651049914172	0.47370280355122	1	4	Heart	2332	0	mmu-miR-574-3p
CCCGUCC	mmu-miR-1247	0.372274252277346	0.354844333442785	1	4	Heart	208	0	mmu-miR-1247
CGAGGAG	mmu-miR-151-5p	2.8604738104664	0.00211504245032048	0.583751716288452	6	Heart	57106	1	mmu-miR-151-5p
CCGAGCC	mmu-miR-615-3p	-0.535537039113845	0.296139276226439	1	3	Heart	4	1	mmu-miR-615-3p
ACGUAGU	mmu-miR-471-5p	0.369708419789585	0.355799878775103	1	3	Heart	11	0	mmu-miR-471-5p
CCUCGGG	mmu-miR-3080-3p	0.643794258159129	0.259854428799598	1	4	Heart	0	0	mmu-miR-3080-3p
CGUGUCU	mmu-miR-187	0.104658026595775	0.458323584454937	1	6	Heart	154	2	mmu-miR-187
GAGCGCC	mmu-miR-339-3p	0.162003367399473	0.435651601050147	1	6	Heart	895	0	mmu-miR-339-3p
GCUCGGU	mmu-miR-423-3p	1.66585837447195	0.047870813043237	1	4	Heart	6233	1	mmu-miR-423-3p
CGACCCA	mmu-miR-551b	-0.348169374498735	0.363856493098484	1	4	Heart	5	2	mmu-miR-551b
AUGGCGC	mmu-miR-652	1.58993727957205	0.0559244717280175	1	2	Heart	9117	1	mmu-miR-652
CCGGUUC	mmu-miR-671-3p	1.20659492422097	0.113794091234574	1	4	Heart	789	0	mmu-miR-671-3p
AGACGGG	mmu-miR-483	0.0275767149915377	0.488999876673146	1	4	Heart	21	0	mmu-miR-483
UAGCCGC	mmu-miR-701	-0.582396628594993	0.280149775960287	1	2	Heart	33	0	mmu-miR-701
ACGCGGG	mmu-miR-700	0.0552462686998454	0.47797113405208	1	1	Heart	222	0	mmu-miR-700
